# Supplementary material for: Further validation of the estimates of the downwelling solar radiation at ground level in cloud-free conditions provided by the McClear service: the case of Sub-Saharan Africa and the Maldives Archipelago
Source: Copernicus journal article supplement (doi:10.5194/amt-16-2001-2023), 2023-04-17
Supplement: Supplementary file 1 [file amt-16-2001-2023-supplement.pdf]

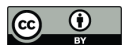

*Supplement of*

**Further validation of the estimates of the downwelling solar radiation at ground level in cloud-free conditions provided by the McClear service: the case of Sub-Saharan Africa and the Maldives Archipelago**

William Wandji Nyamsi et al.

*Correspondence to:* William Wandji Nyamsi ([william.wandji@fmi.fi](mailto:william.wandji@fmi.fi))

The copyright of individual parts of the supplement might differ from the article licence.

Here are given graphs of the comparisons between McClear-v3 estimates and ground-based measurements for all stations ordered by decreasing latitude and for (1) global irradiance  $G$ , (2) direct component at normal incidence  $B_N$ , (3) clearness index  $KT$  and (4) direct clearness index  $KT_{BN}$ . At each station, the description is as follows:

- Top left graph shows the 2D histogram between measurements (horizontal axis) and McClear-v3 estimates (vertical axis). The color indicates the number of pairs in each class.
- Top right graph shows statistical indicators (correlation coefficient, relative bias and relative root mean square error) per month. Each year being represented by one color.
- Bottom left graph shows boxplots of the ratios between the McClear estimates (Est) and the measurements (Meas) for several classes of various variables. In each boxplot, the red point is the mean while the lower, middle, and upper lines are respectively the 25, 50 and 75 percentiles. The number of samples is given for each class. Only classes with at least 50 samples are drawn.
- Bottom right graph. Same as Bottom left graph but for the difference between the McClear estimates (Est) and the measurements (Meas).

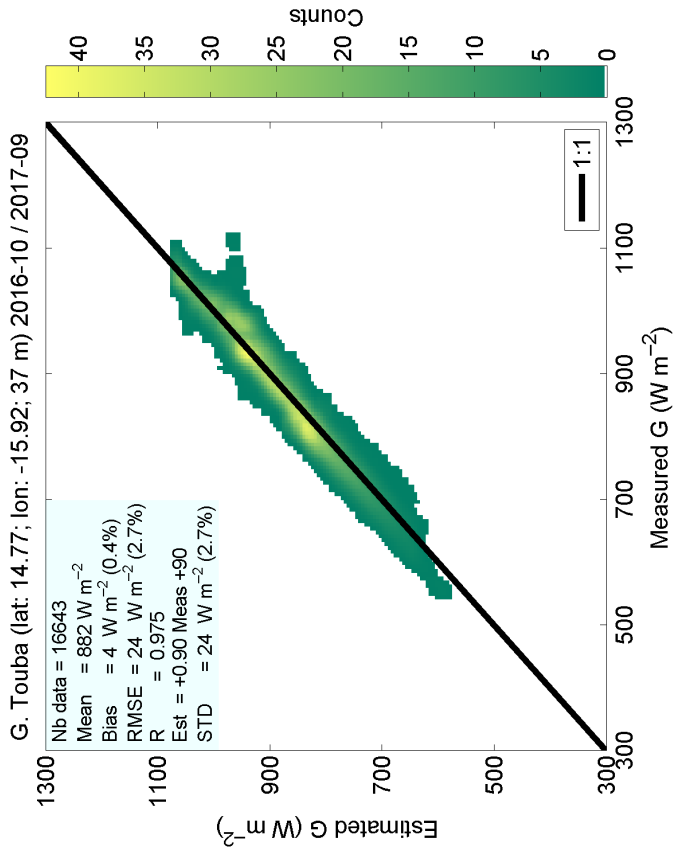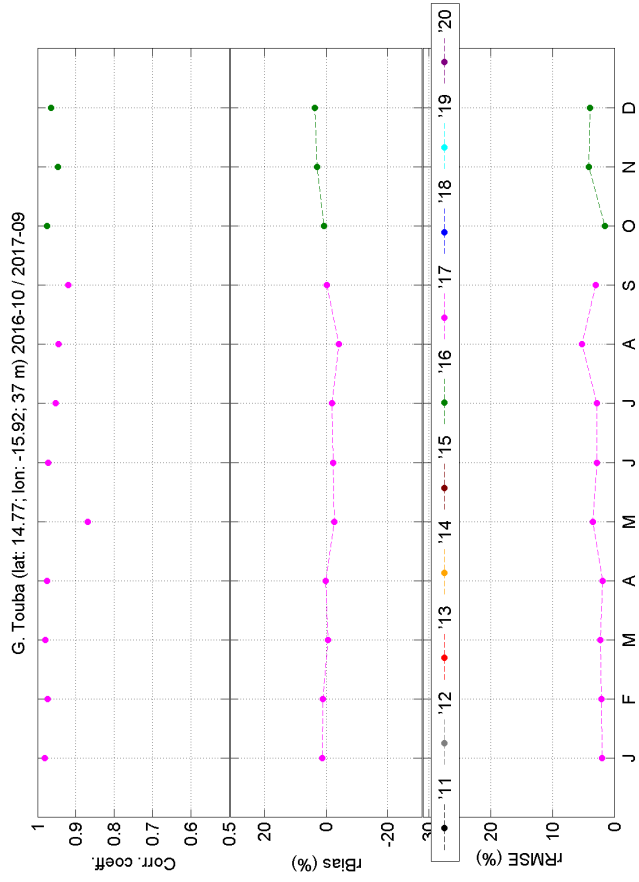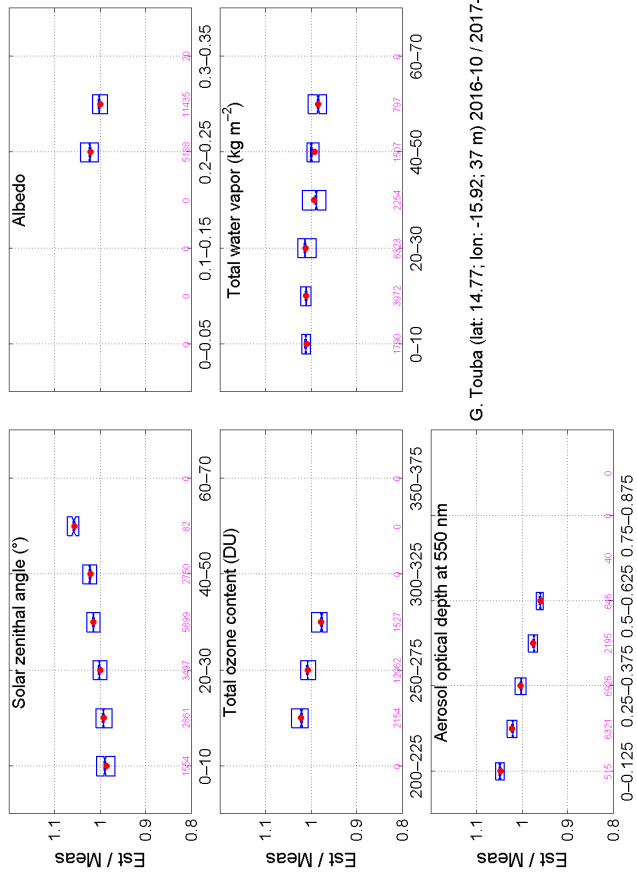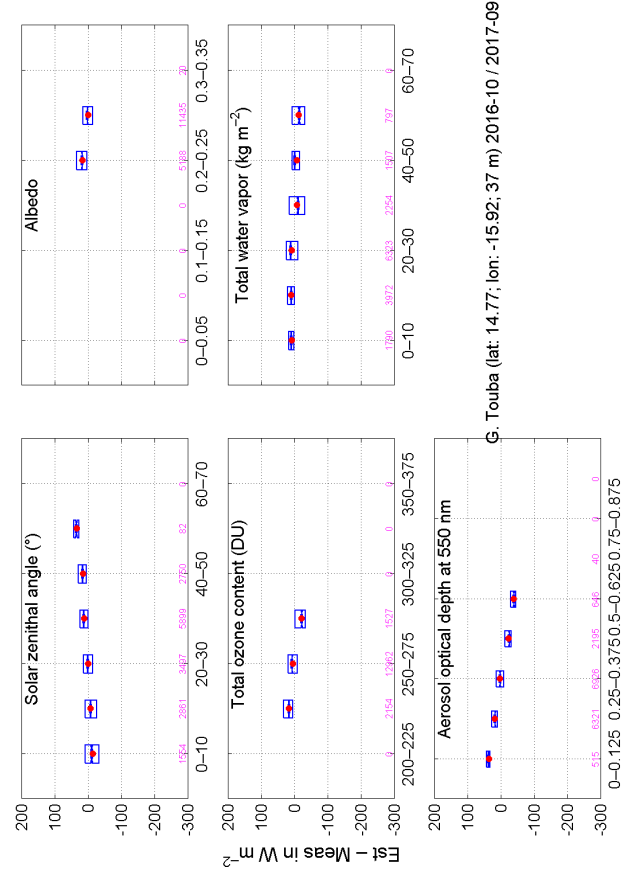

Figure S1: Comparison on global irradiance at Touba

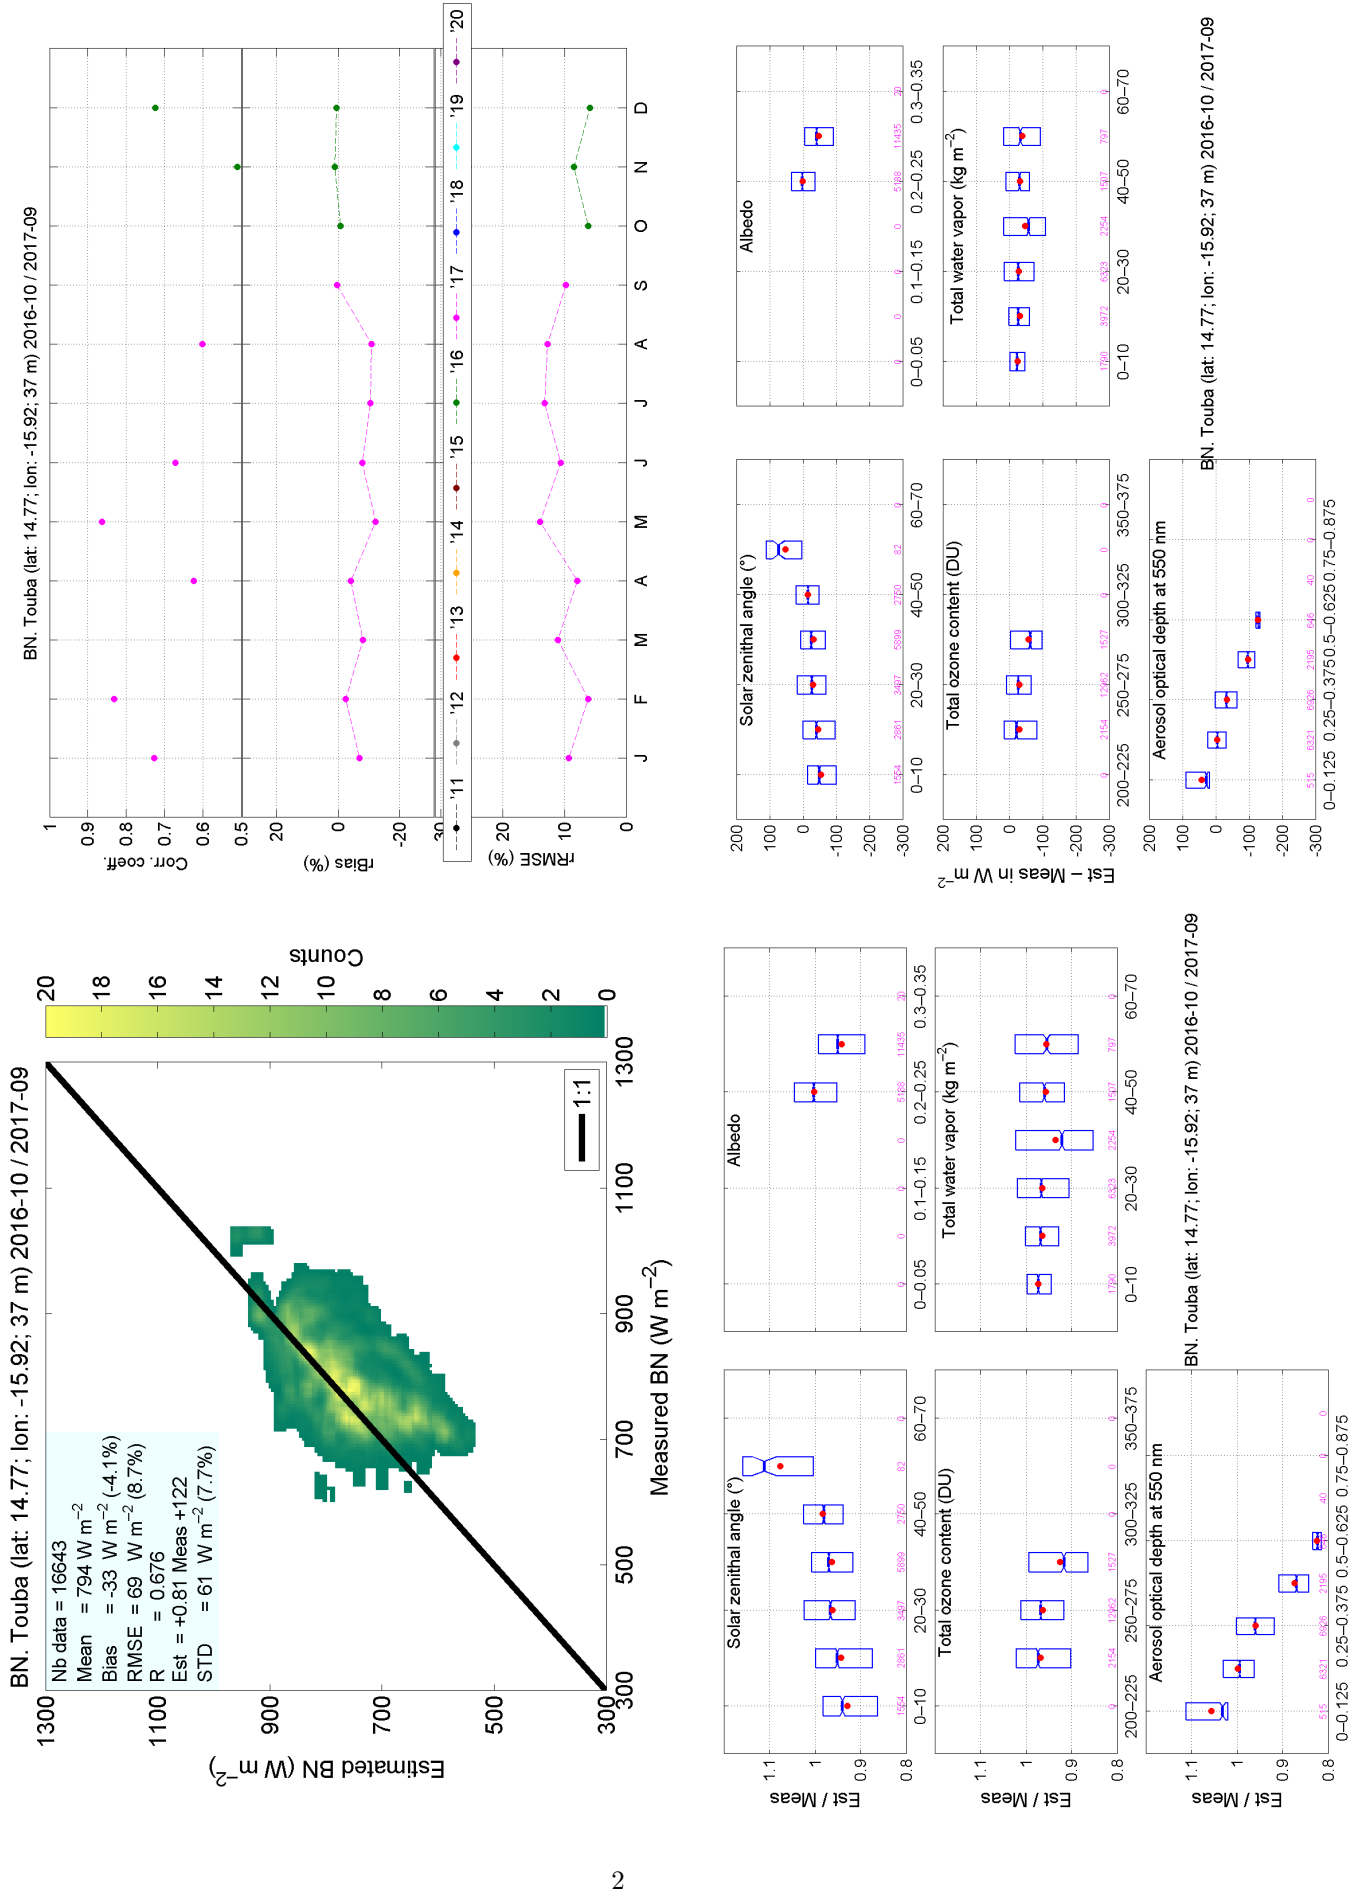

Figure S2: Comparison on direct component at normal irradiance at Touba

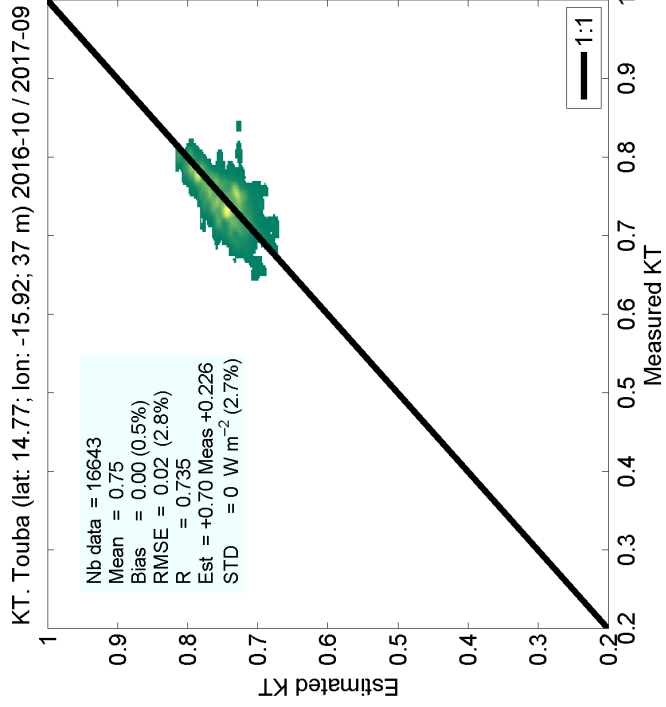

KT. Touba (lat: 14.77; lon: -15.92; 37 m) 2016-10 / 2017-09

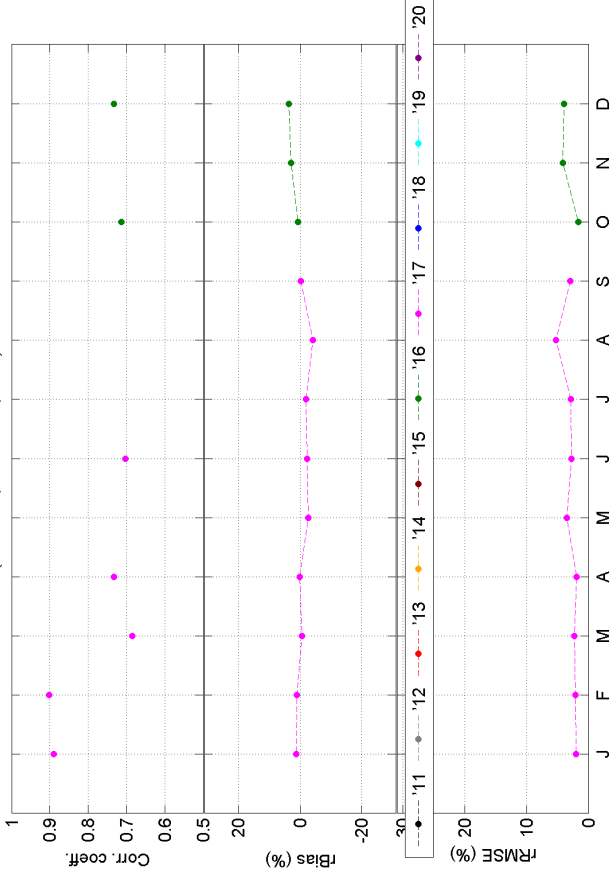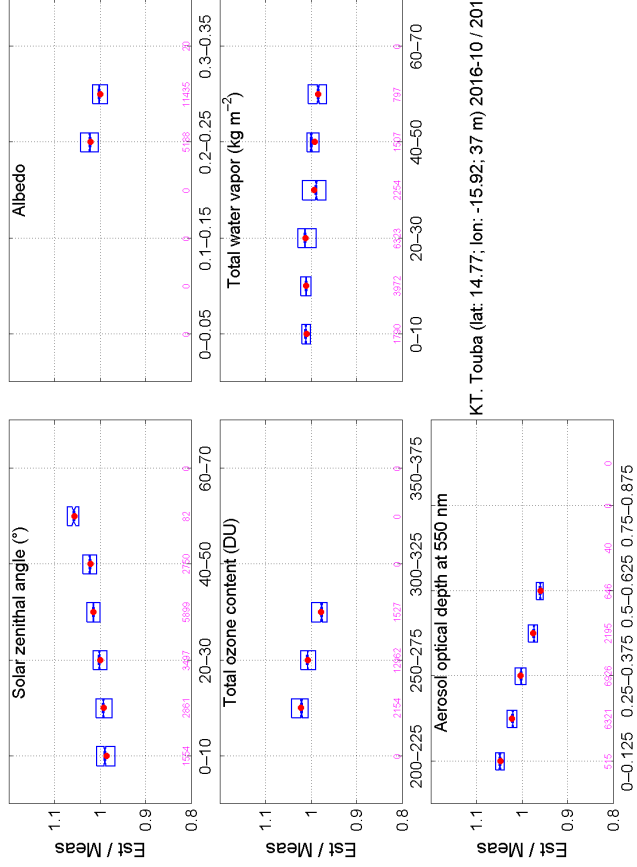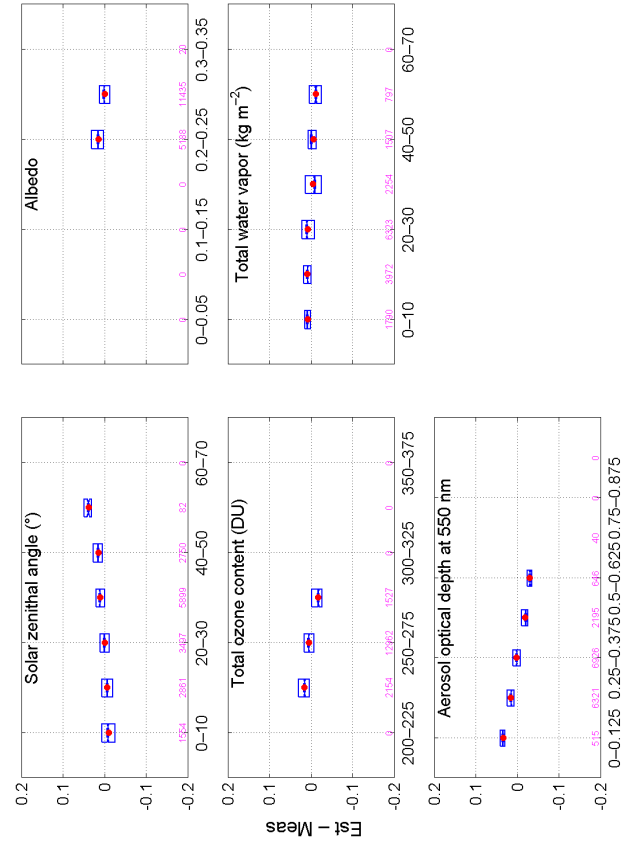

Figure S3: Comparison on clearness index at Touba

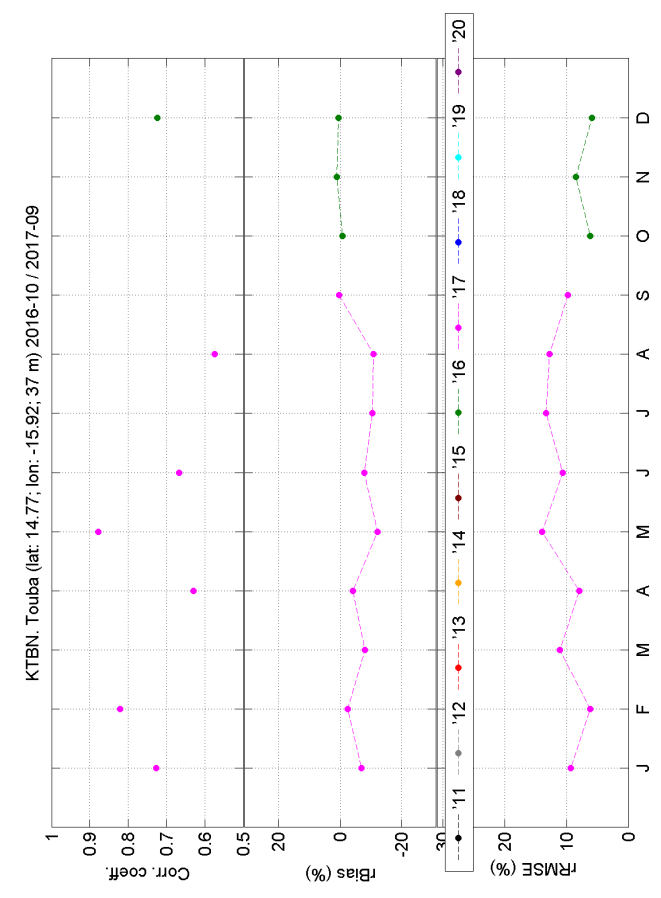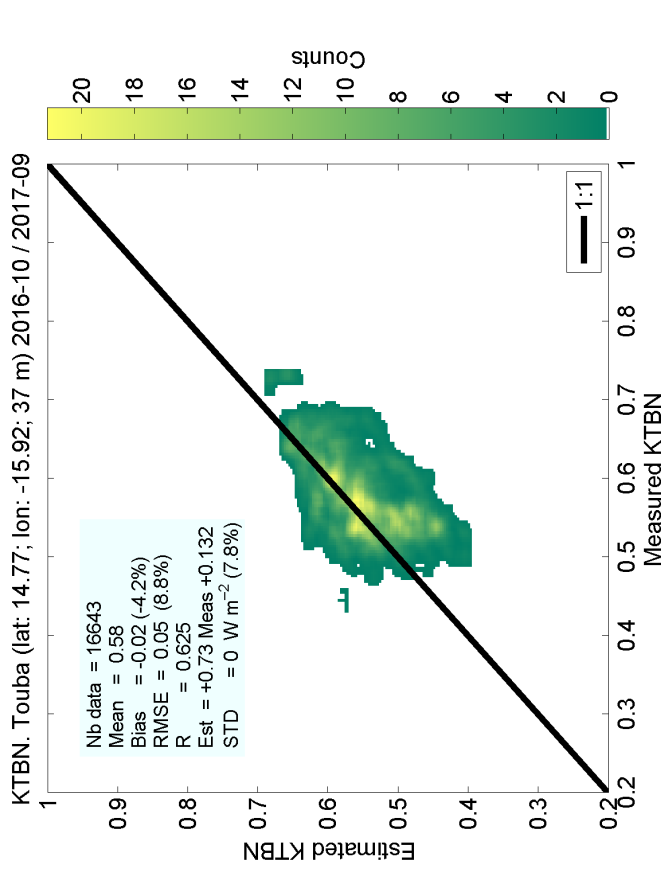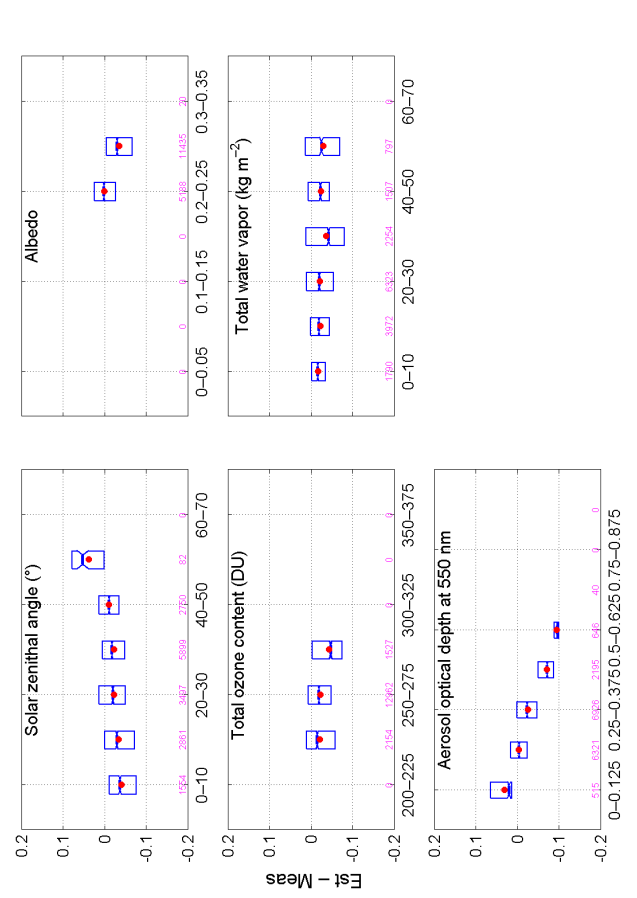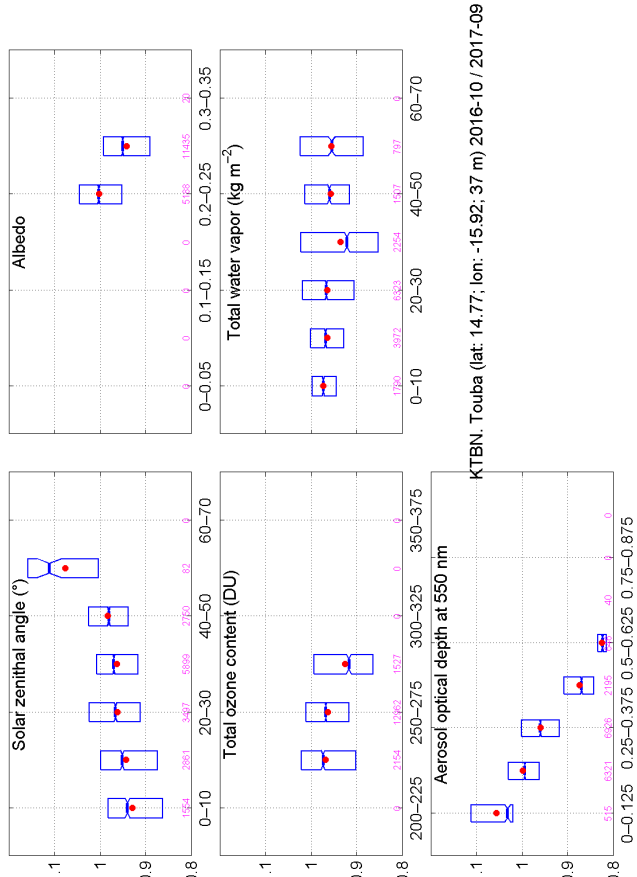

Figure S4: Comparison on direct clearness index at Touba

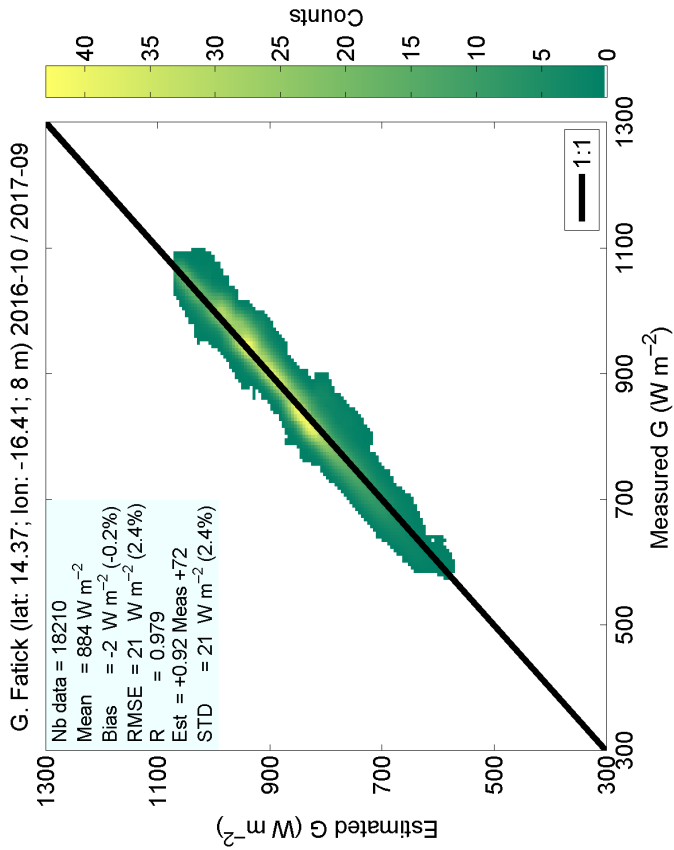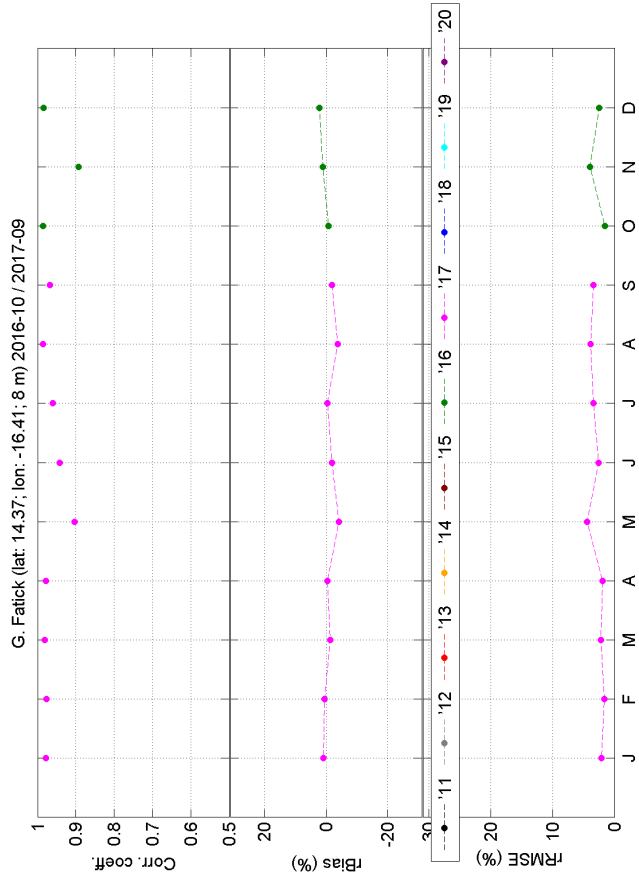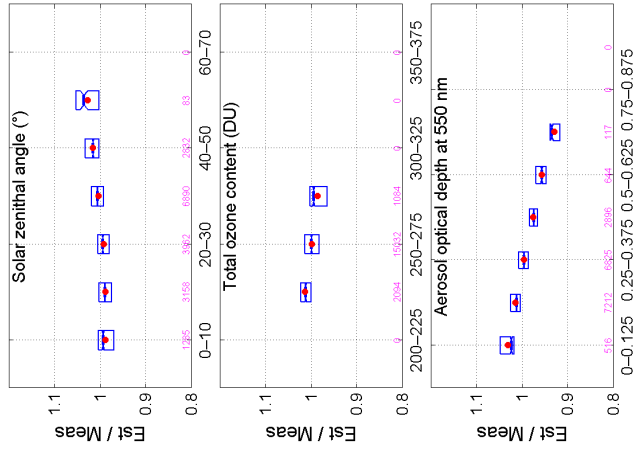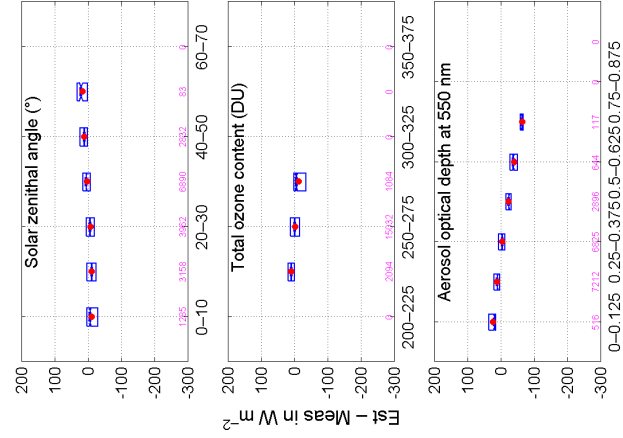

Figure S5: Comparison on global irradiance at Fatick

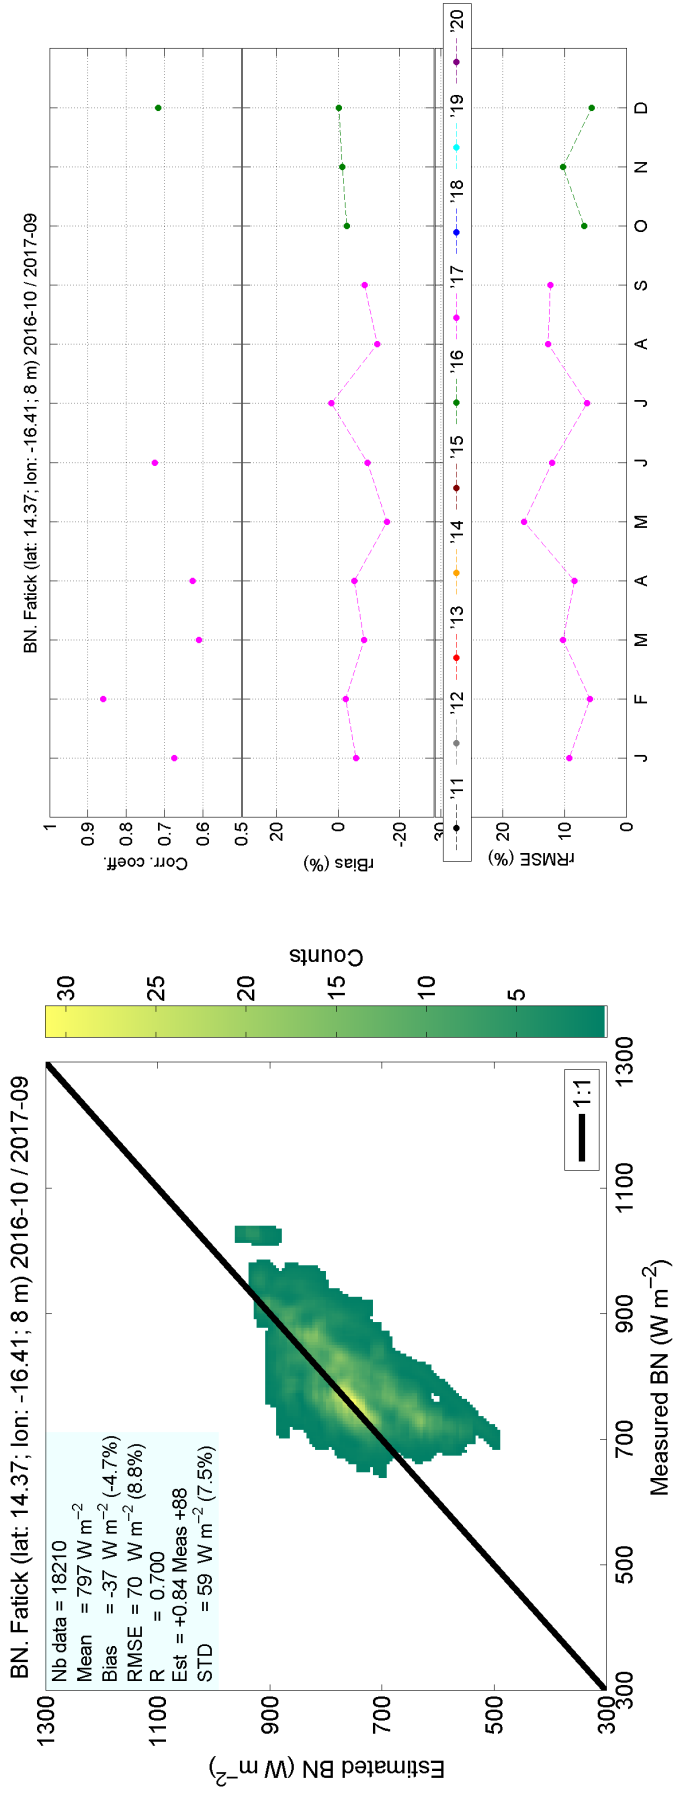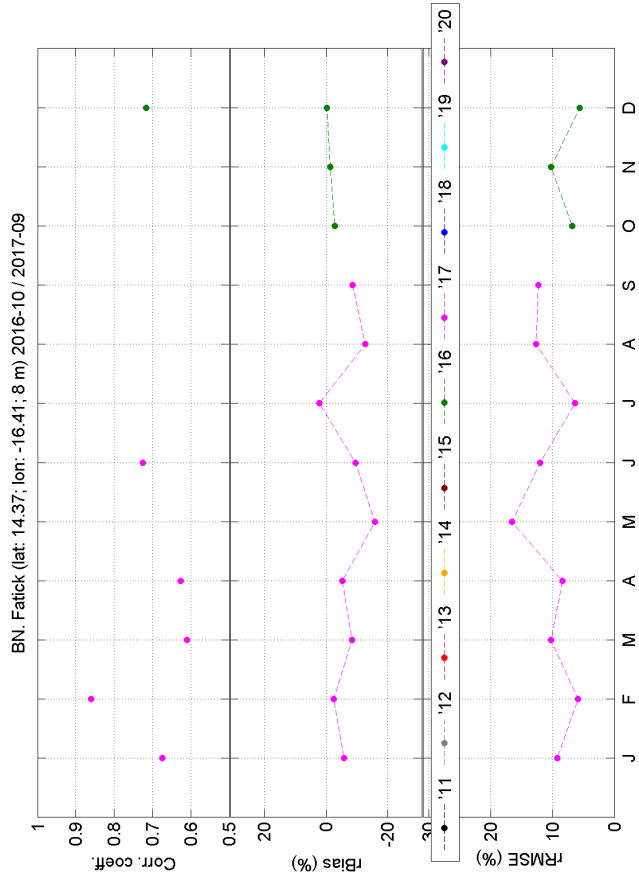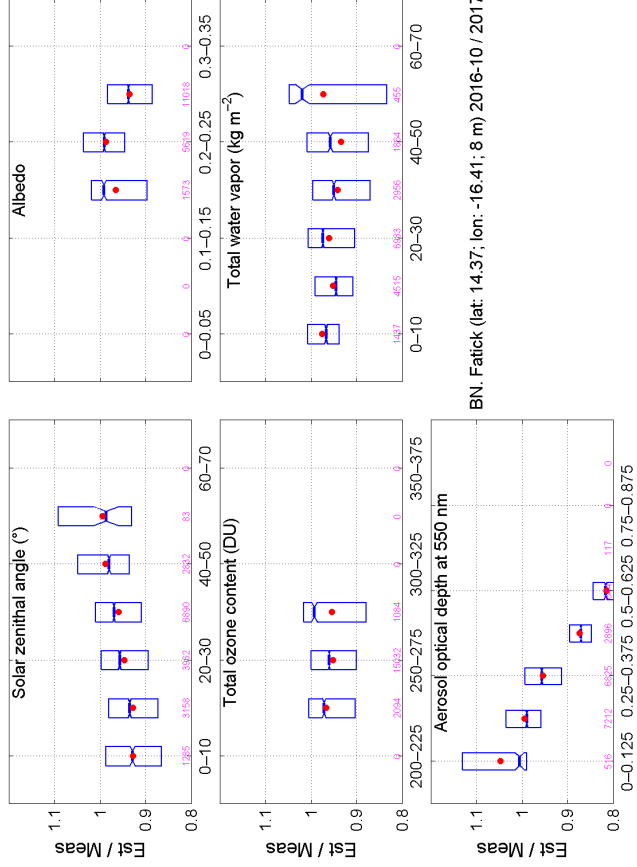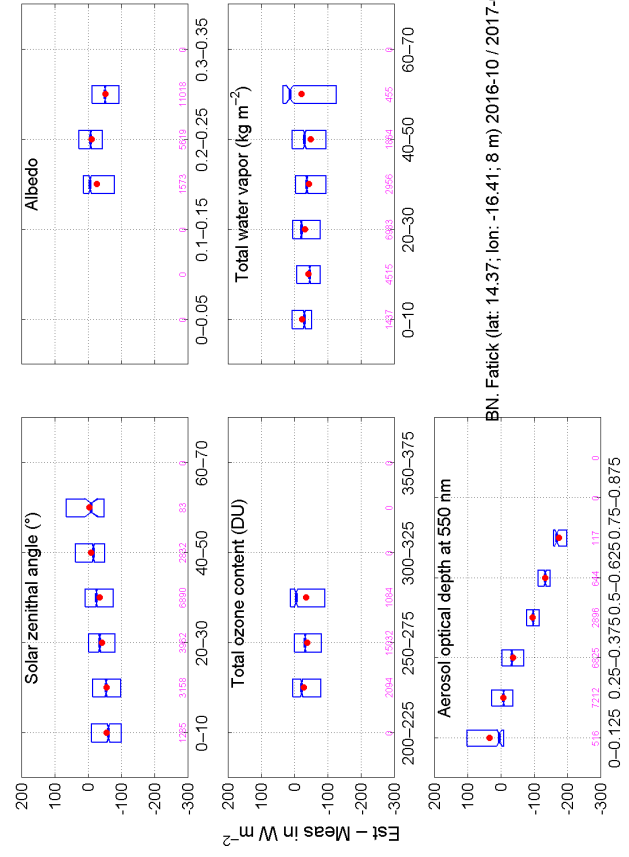

Figure S6: Comparison on direct component at normal irradiance at Fatick



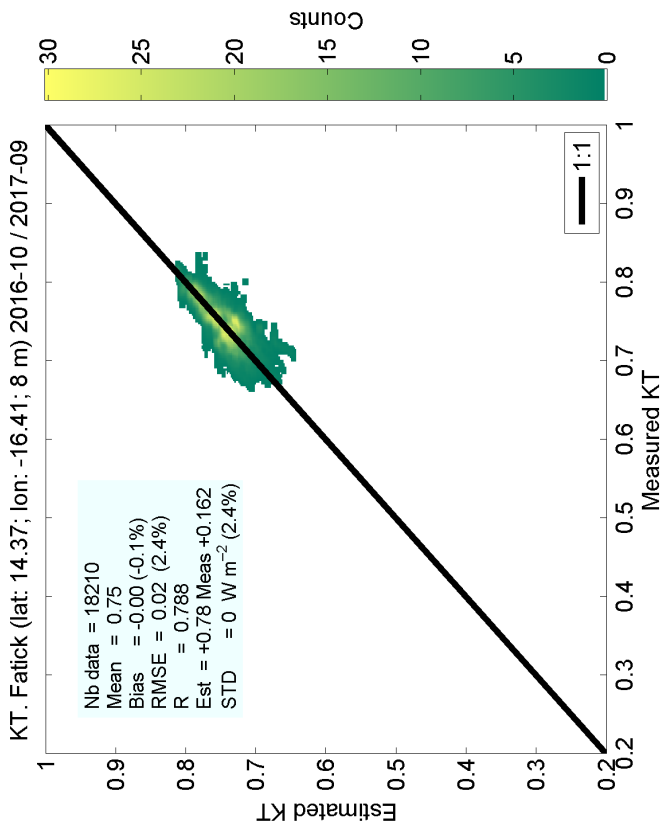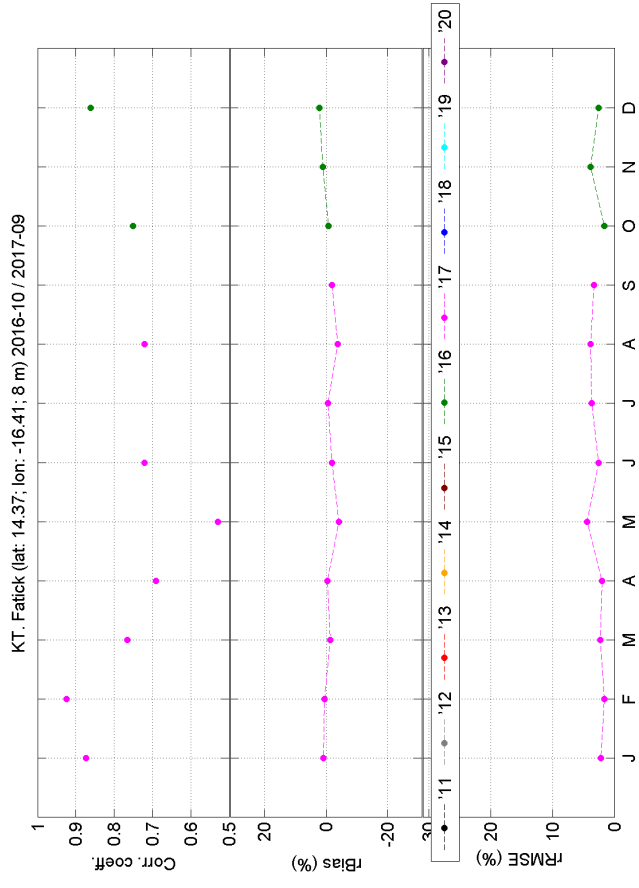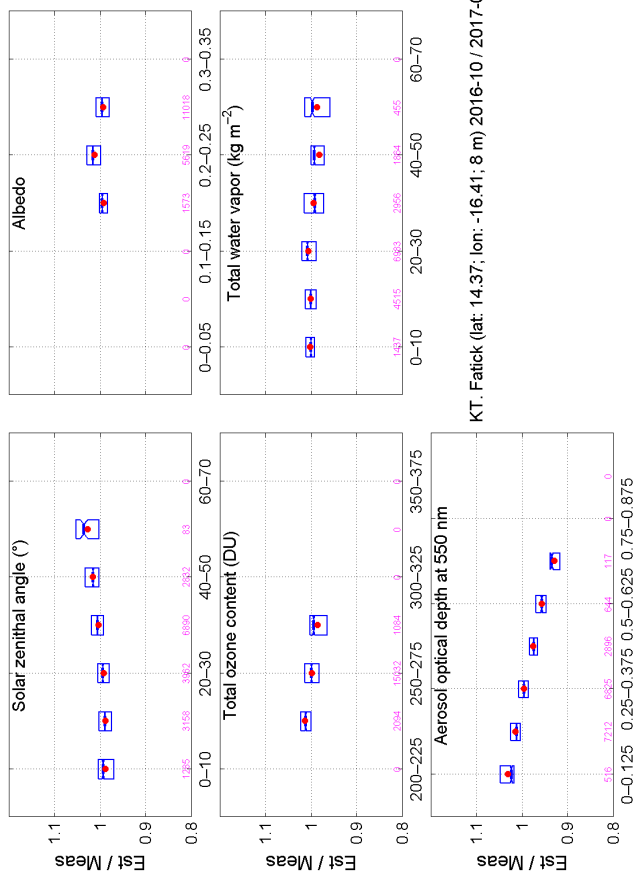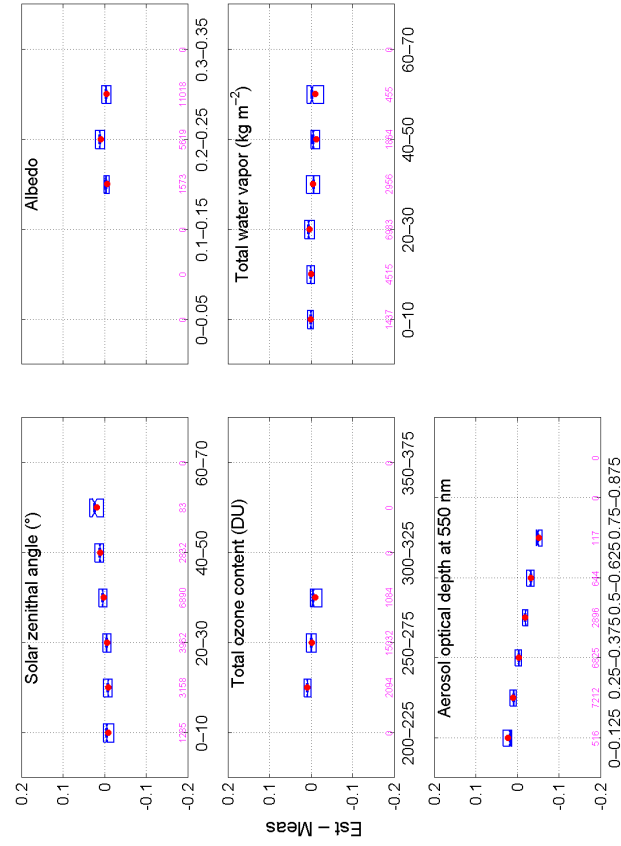

Figure S7: Comparison on clearness index at Fatick

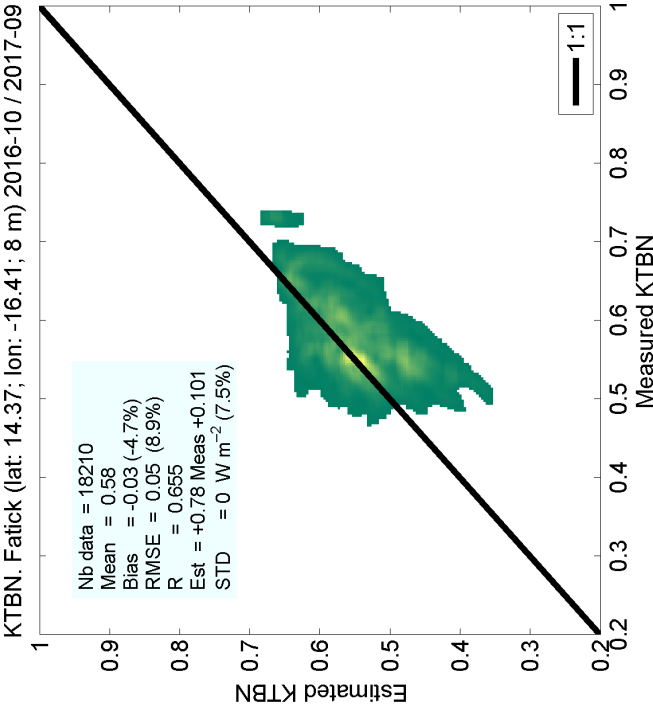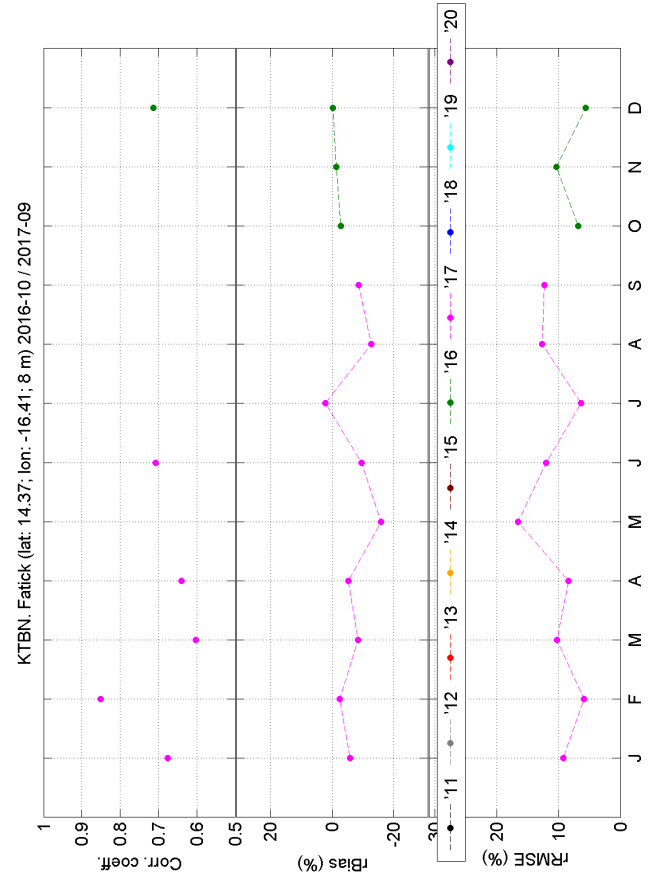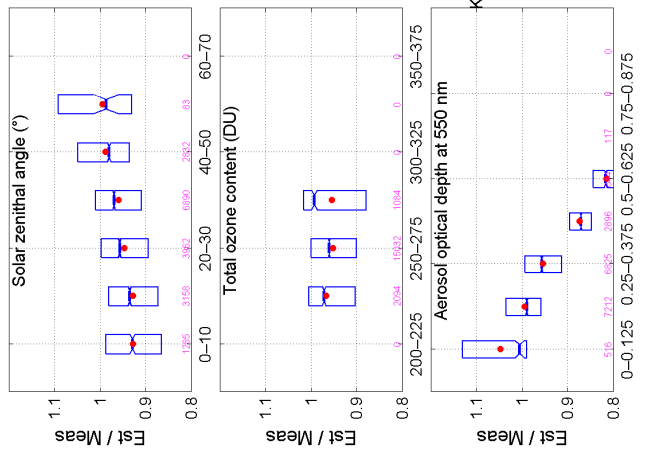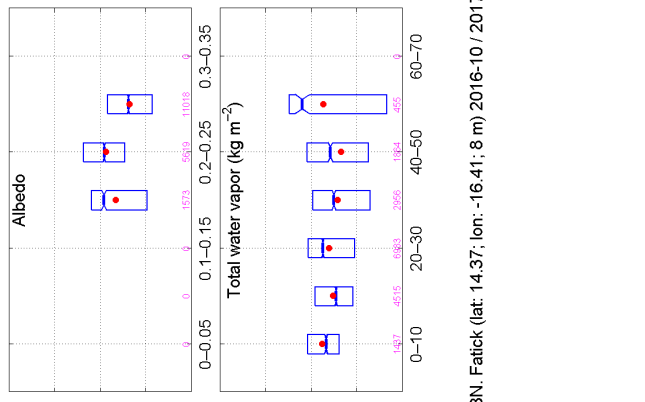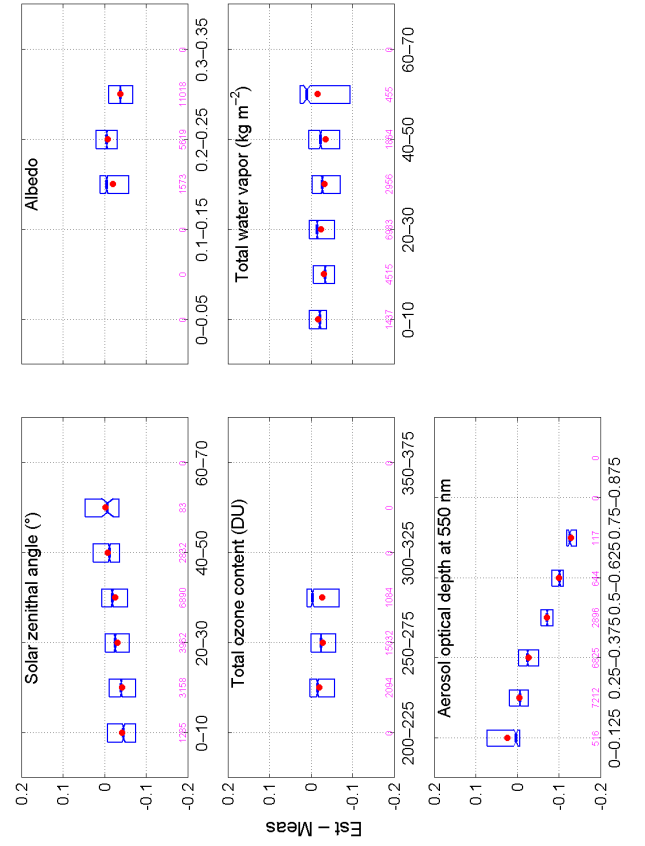

Figure S8: Comparison on direct clearness index at Fatick

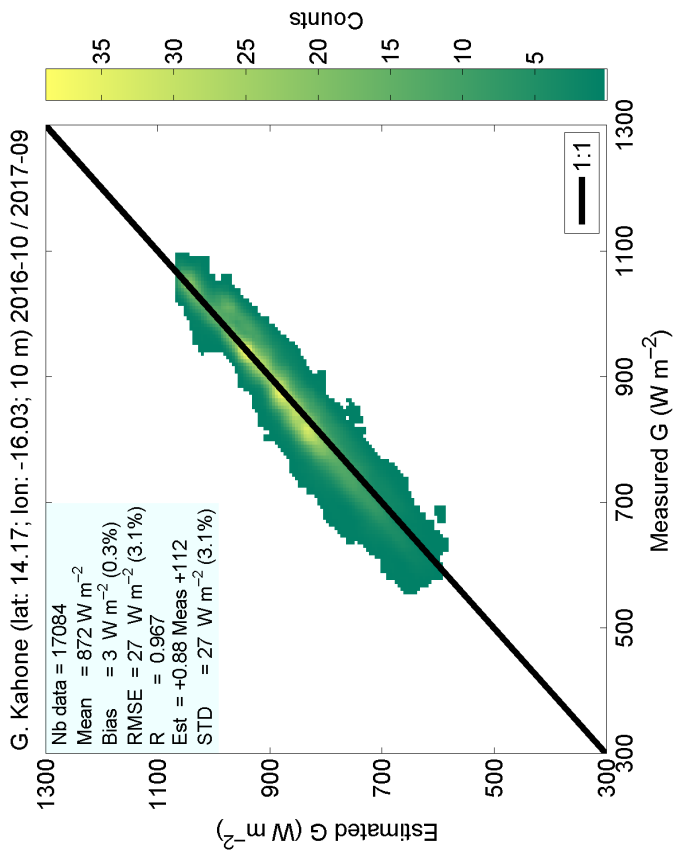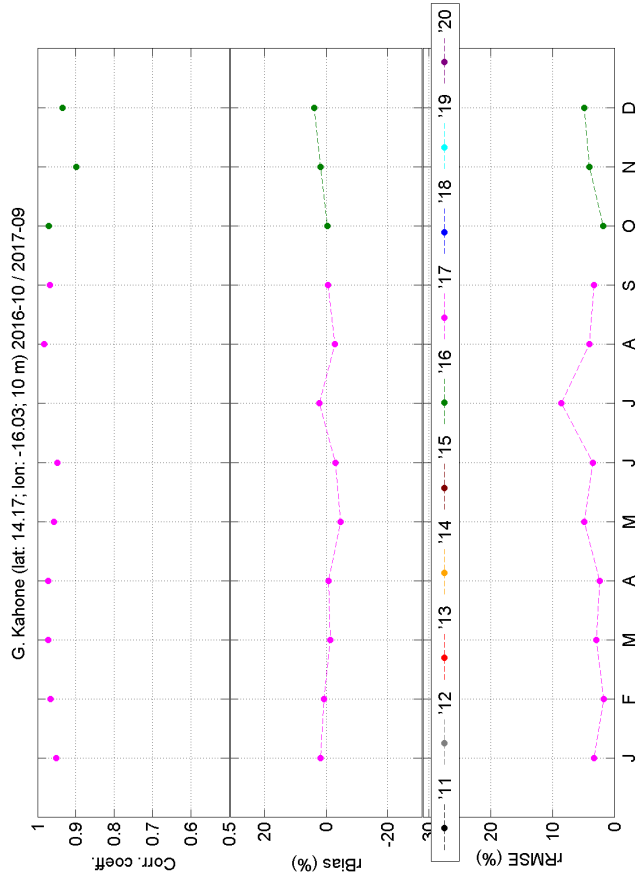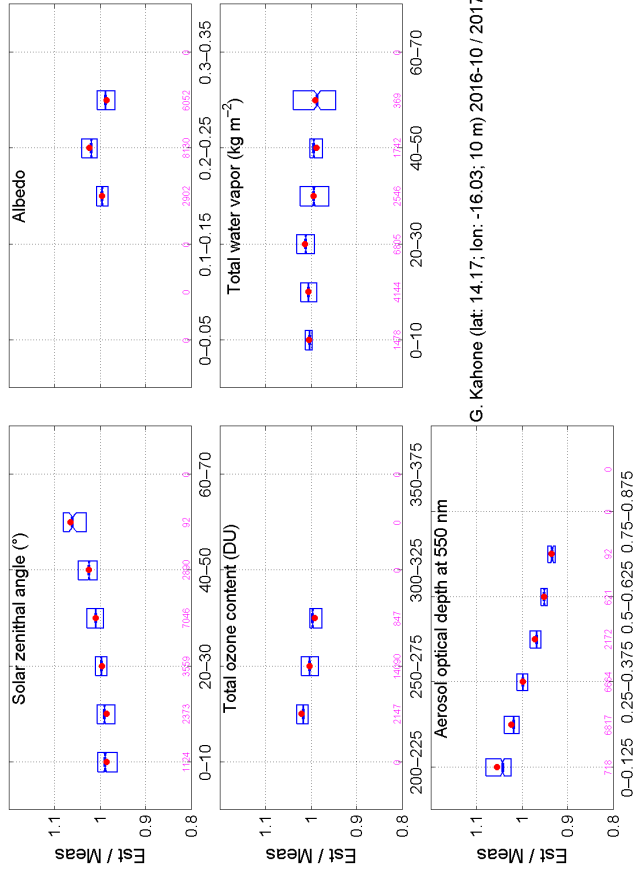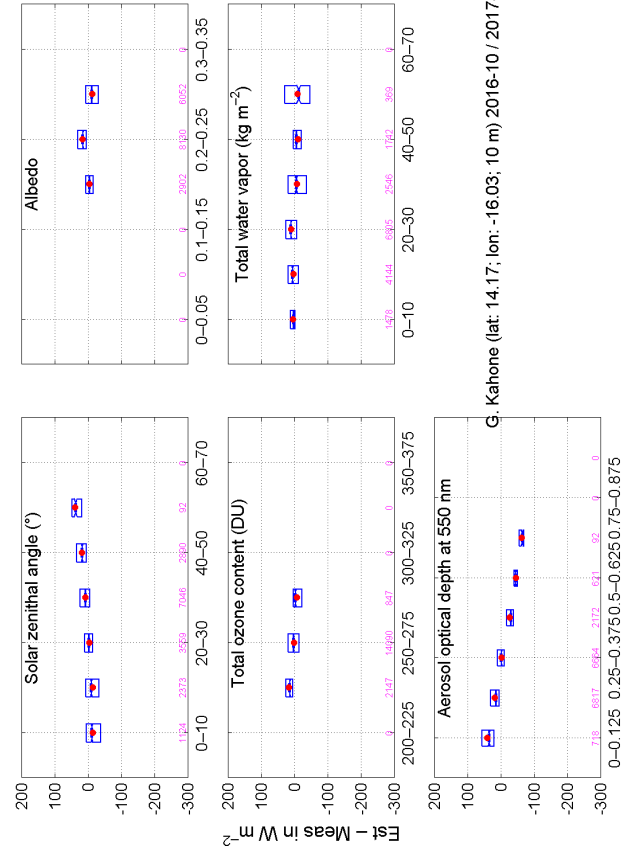

Figure S9: Comparison on global irradiance at Kahone

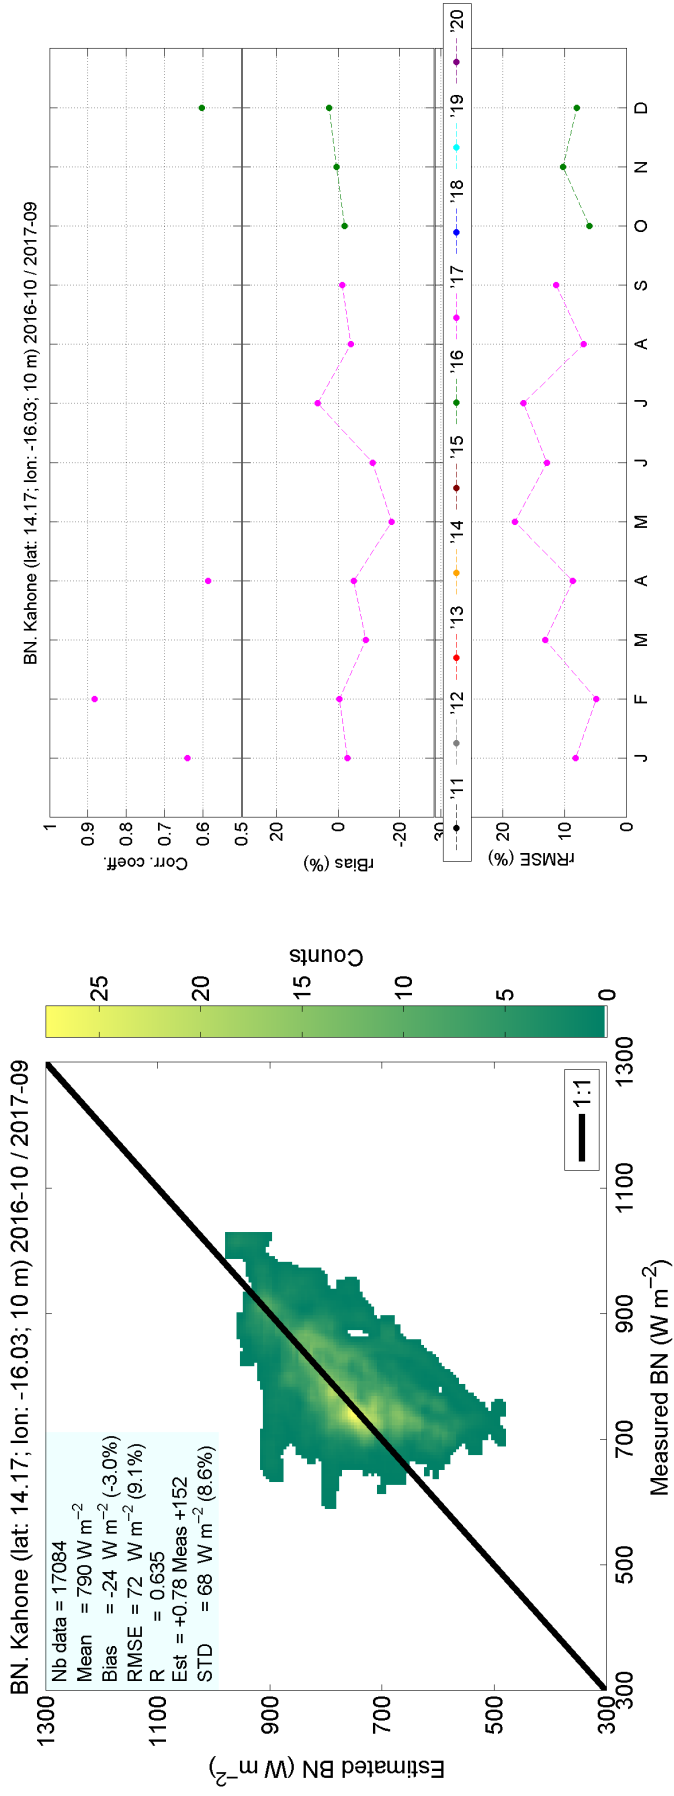

BN, Kahone (lat: 14.17; lon: -16.03; 10 m) 2016-10 / 2017-09

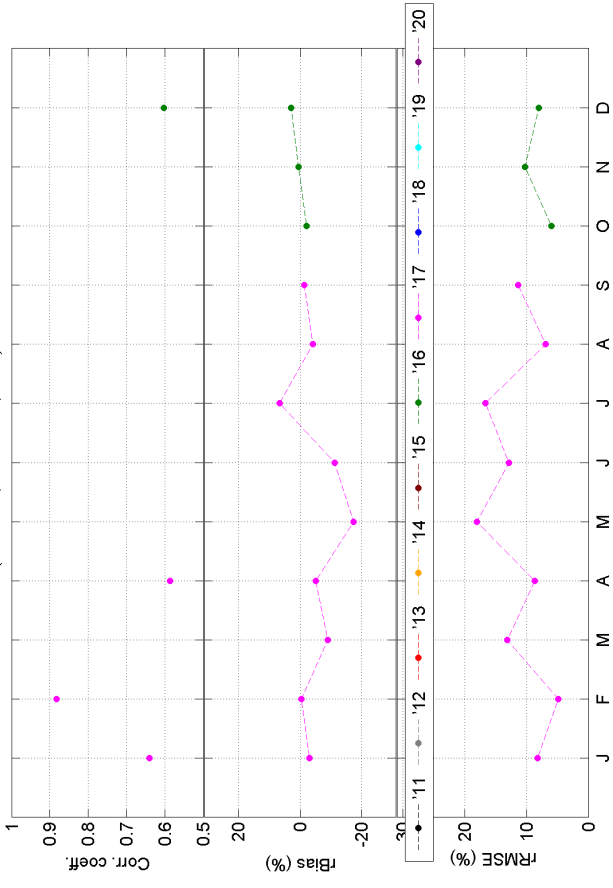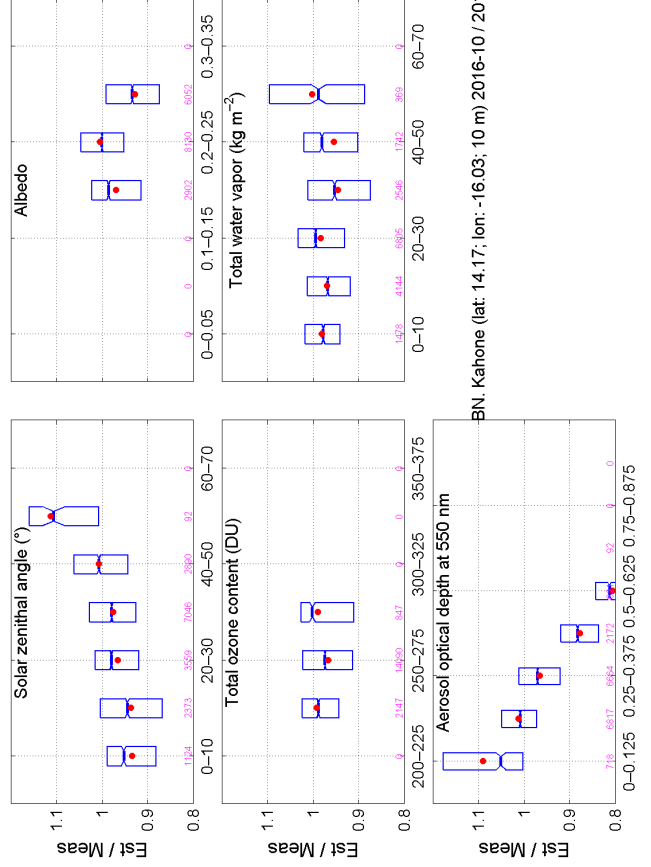

BN, Kahone (lat: 14.17; lon: -16.03; 10 m) 2016-10 / 2017-09

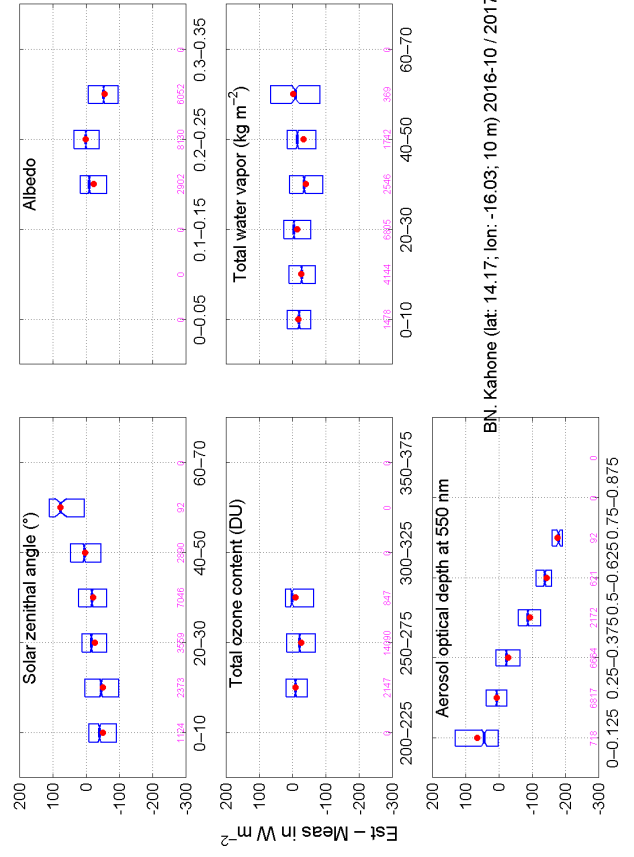

BN, Kahone (lat: 14.17; lon: -16.03; 10 m) 2016-10 / 2017-09

Figure S10: Comparison on direct component at normal irradiance at Kahone

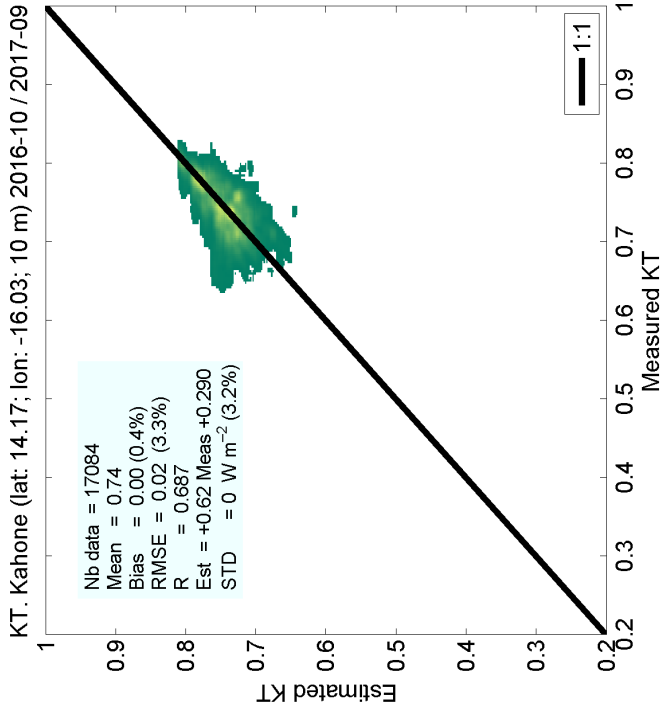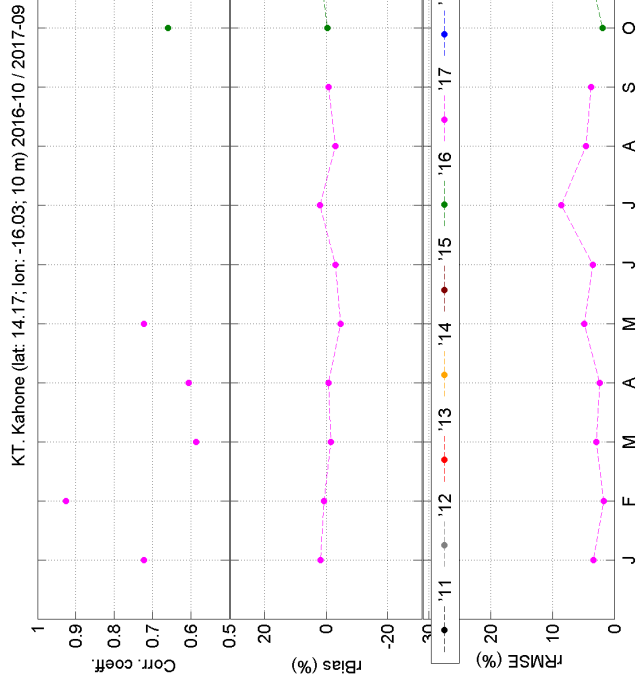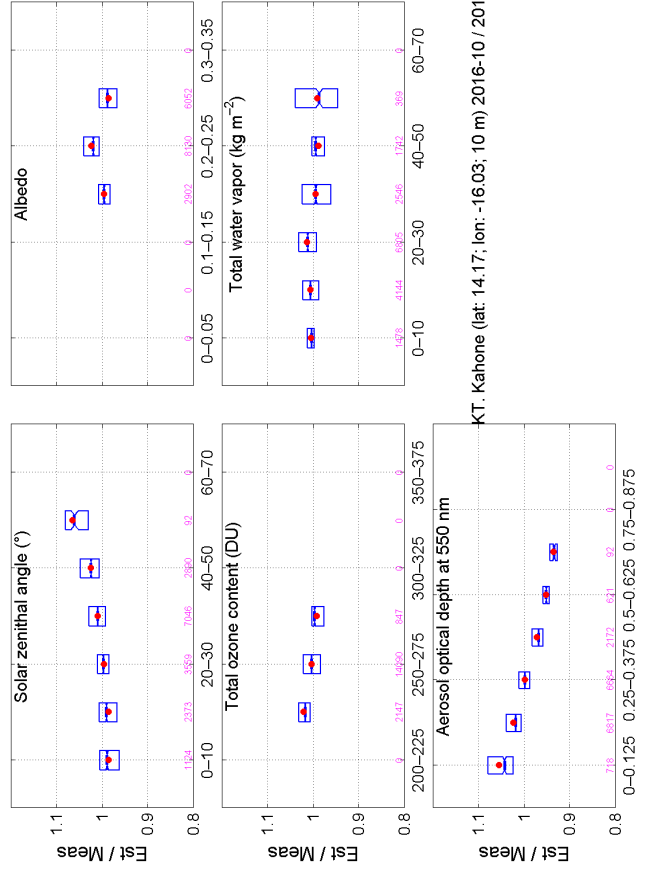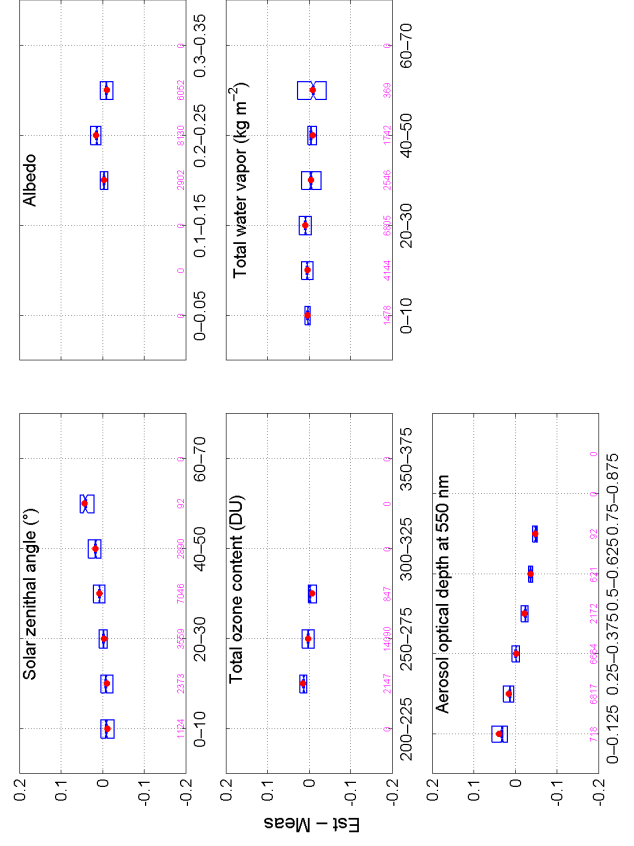

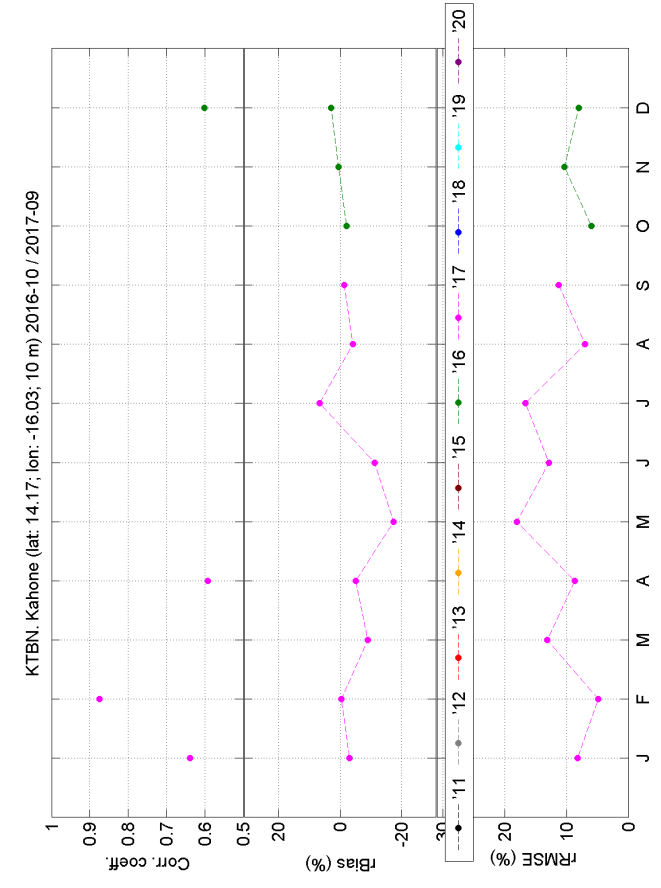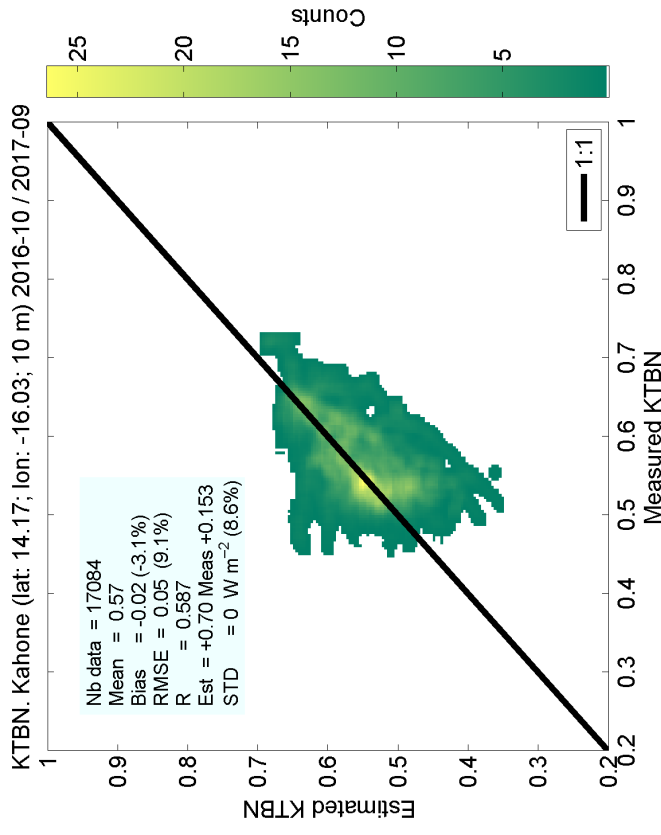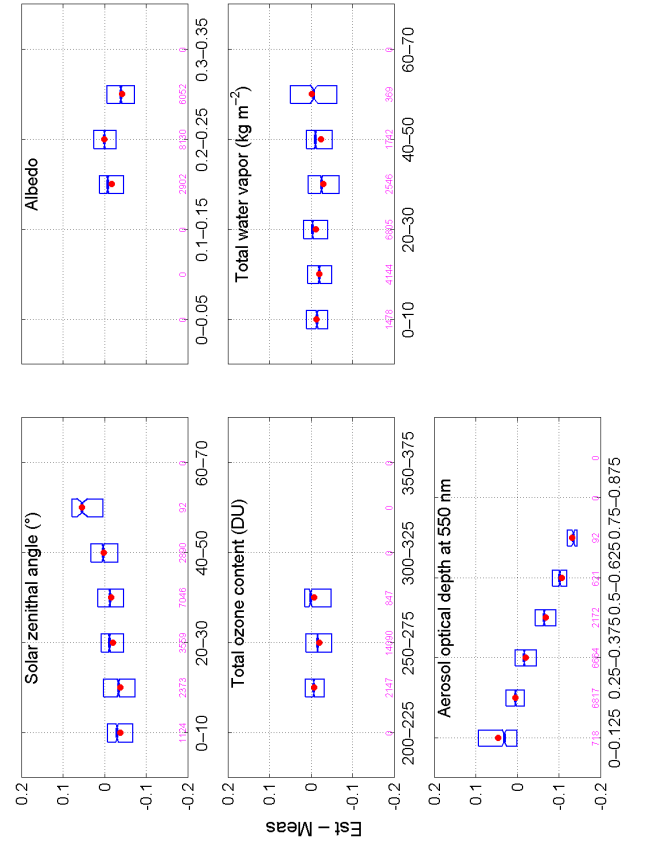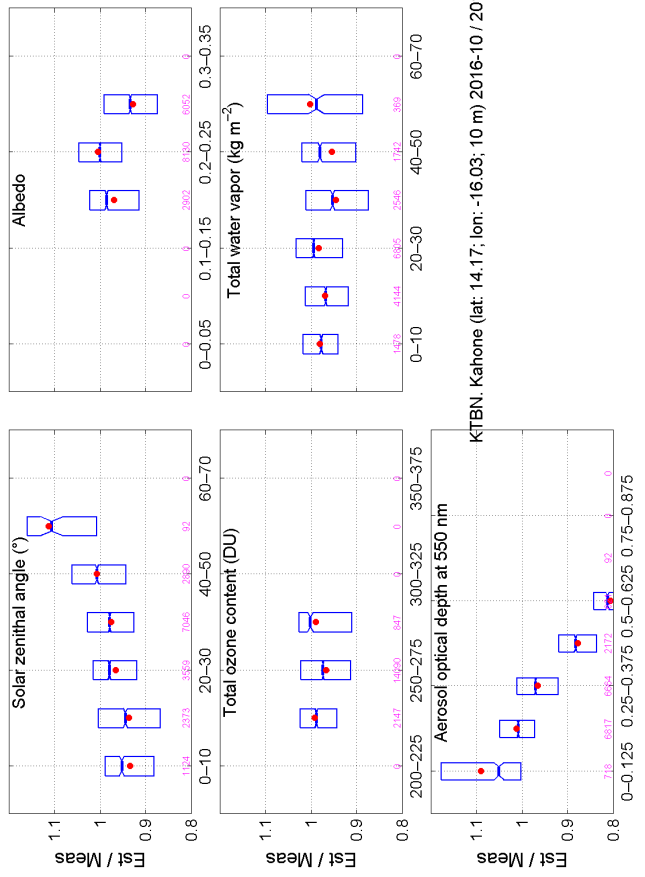

Figure S12: Comparison on direct clearness index at Kahone

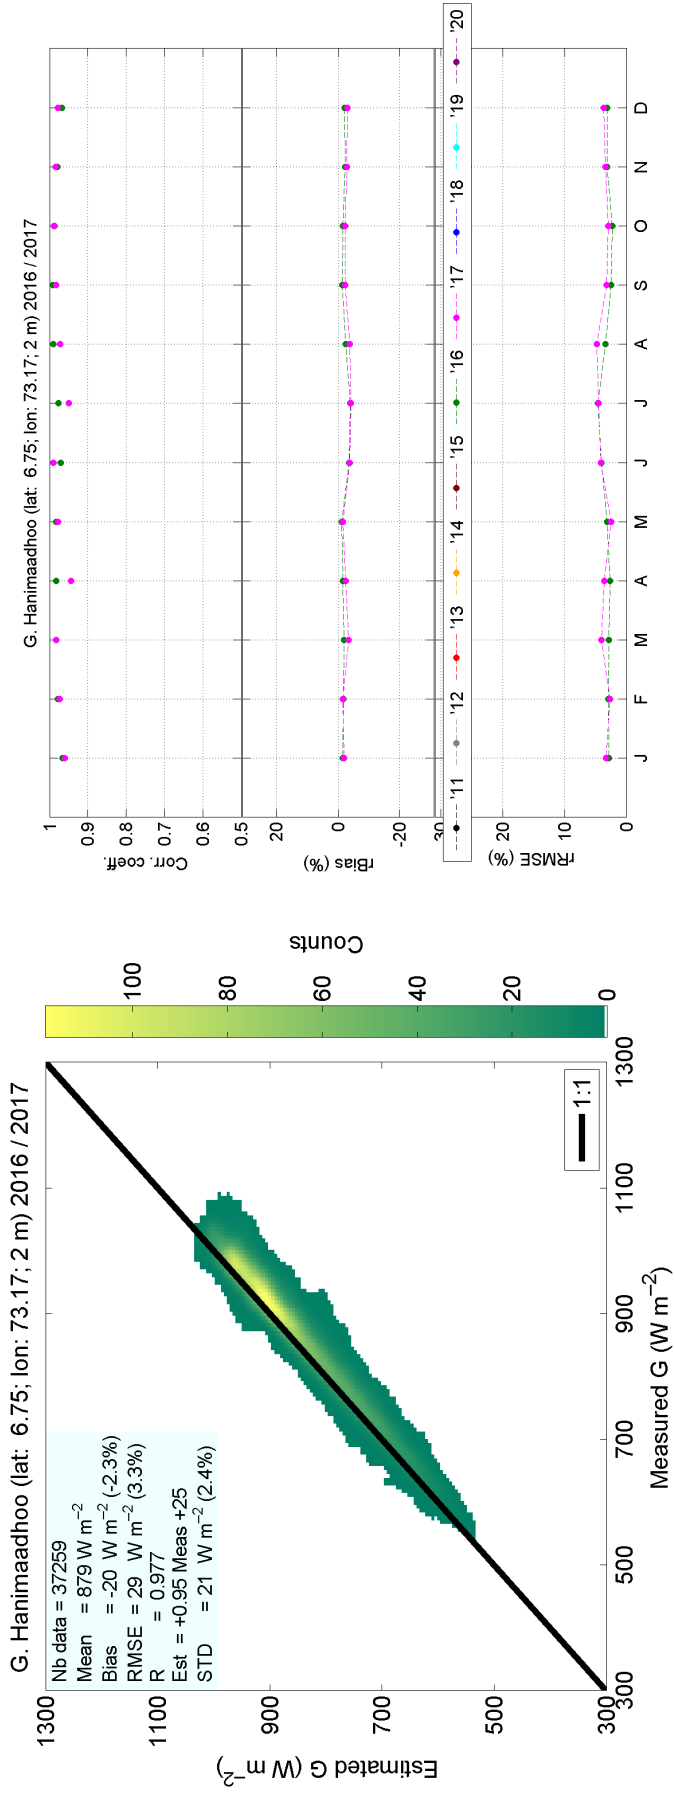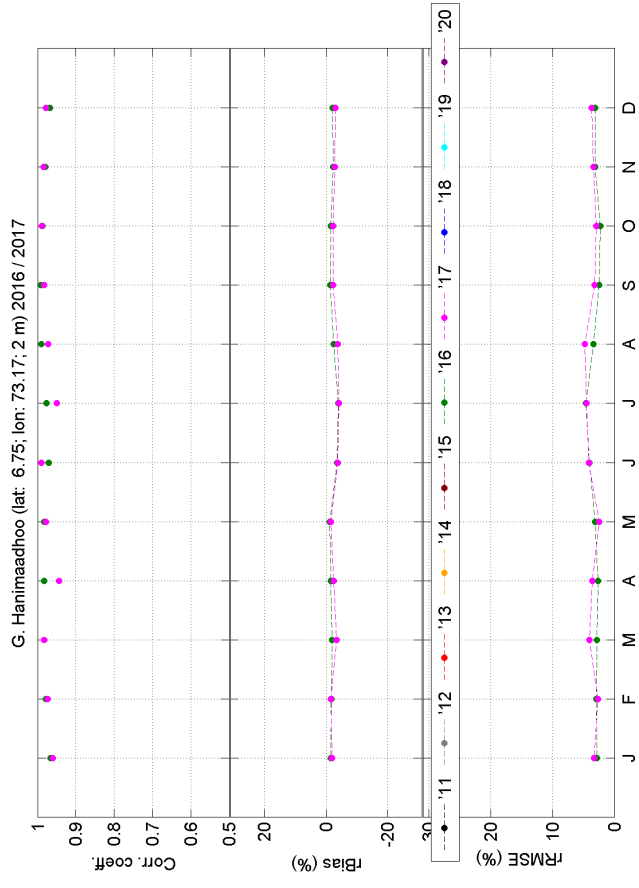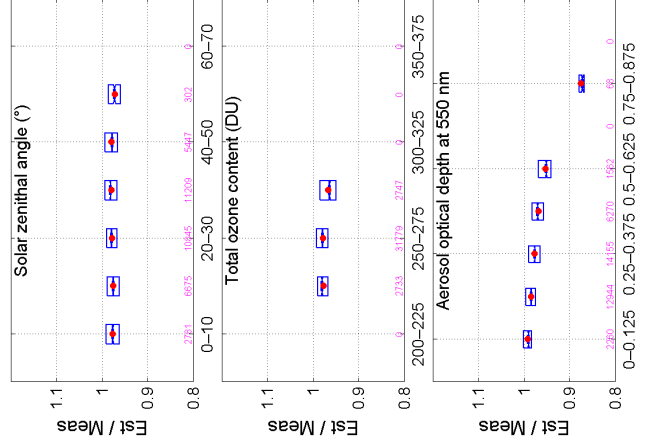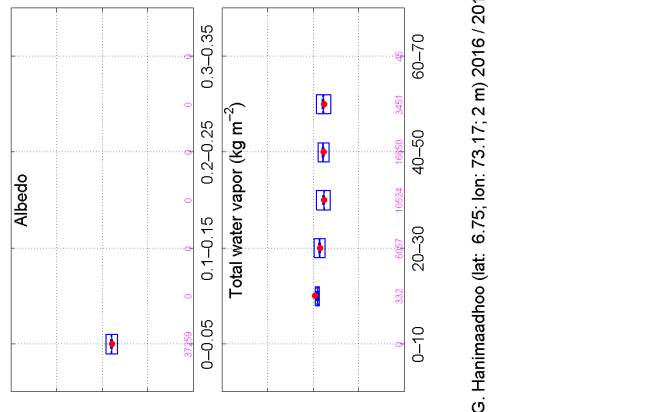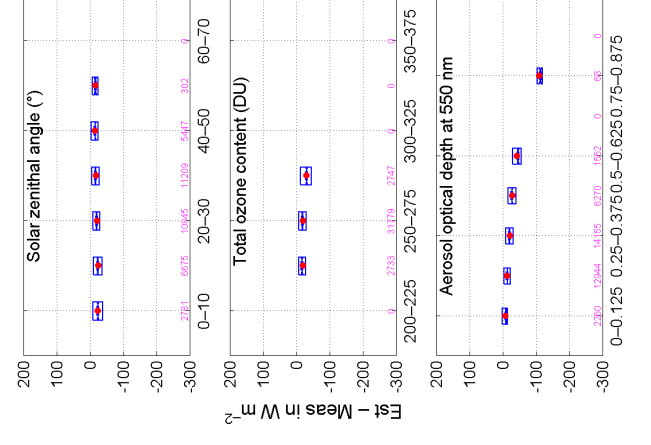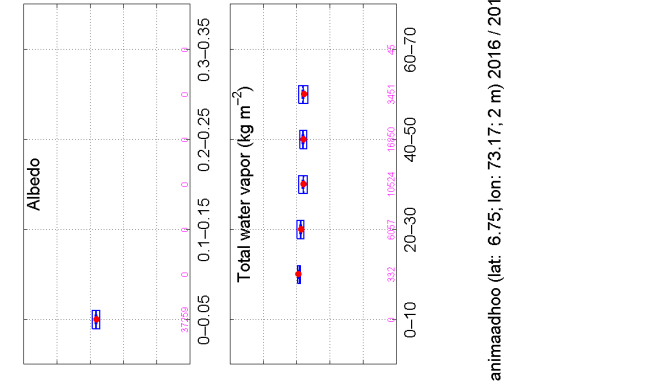

Figure S13: Comparison on global irradiance at Hanimaadhoo

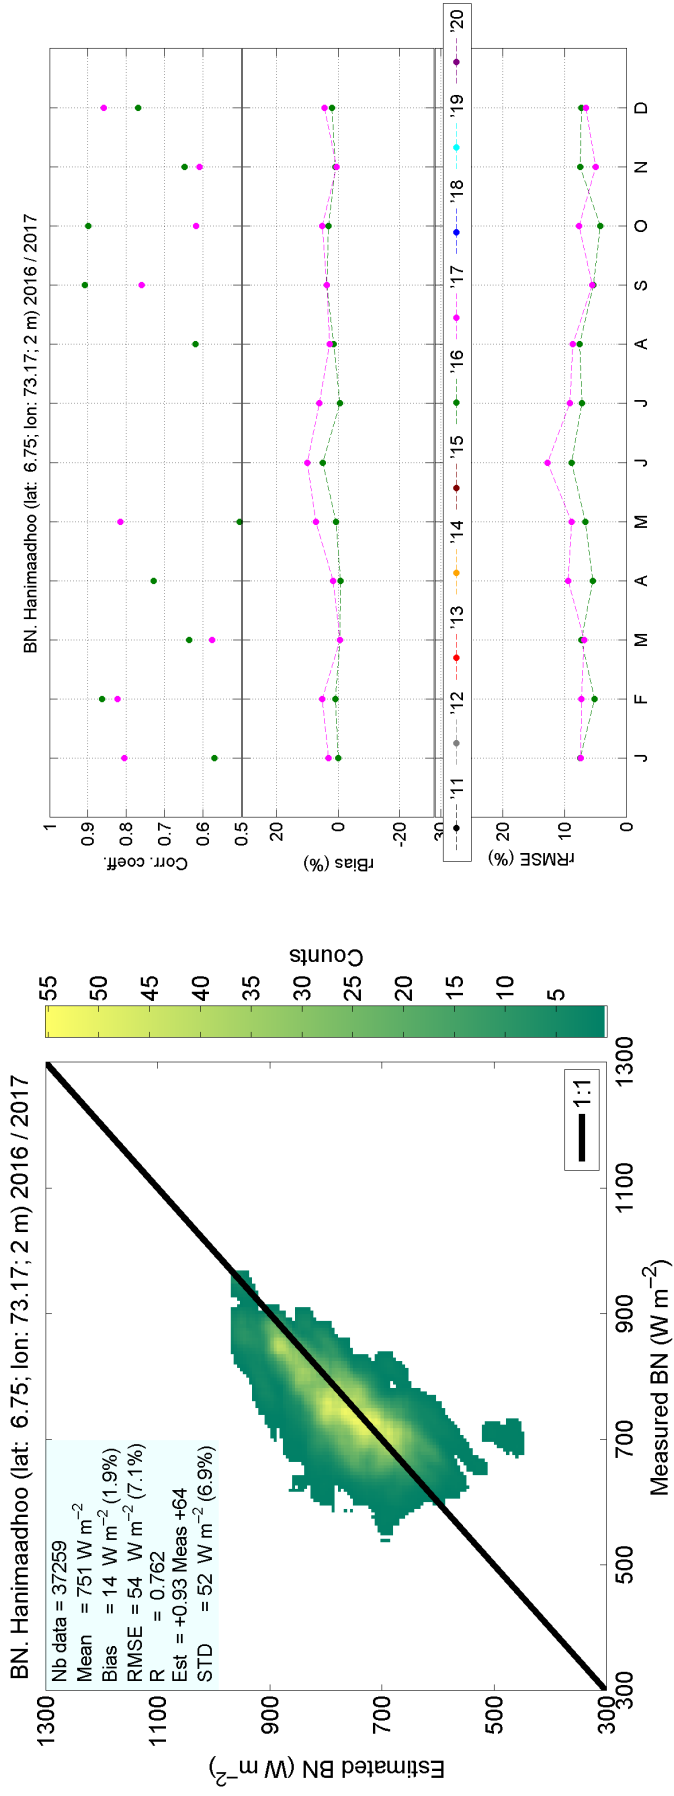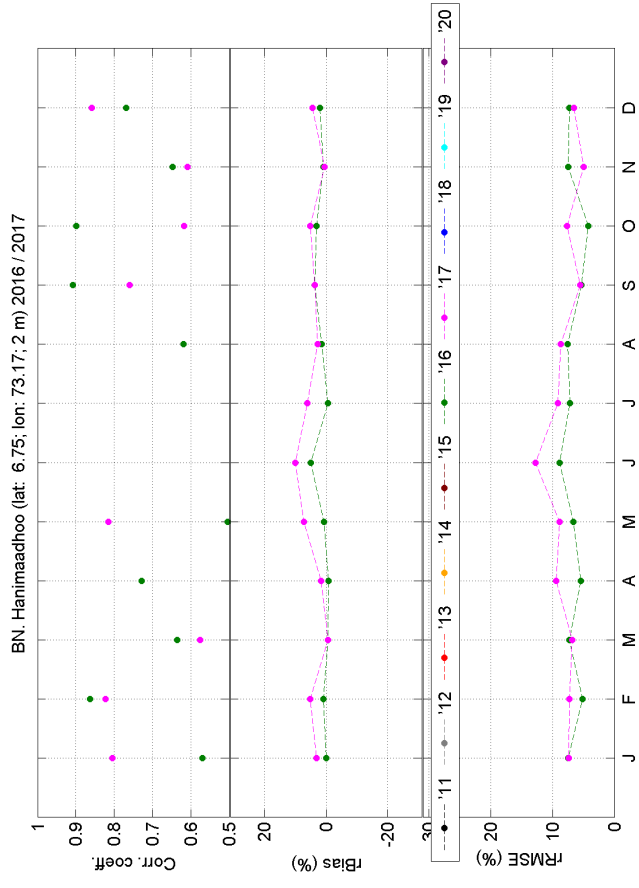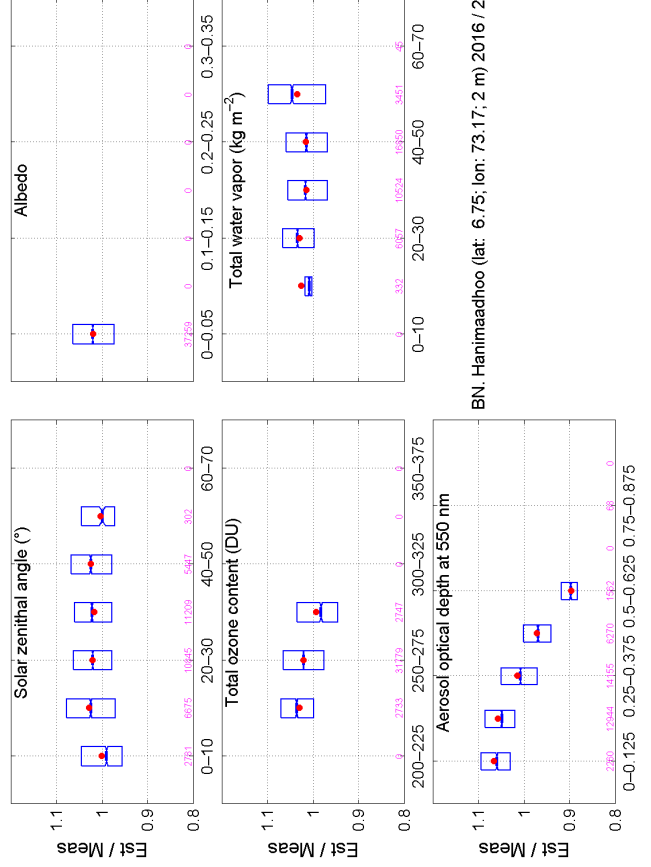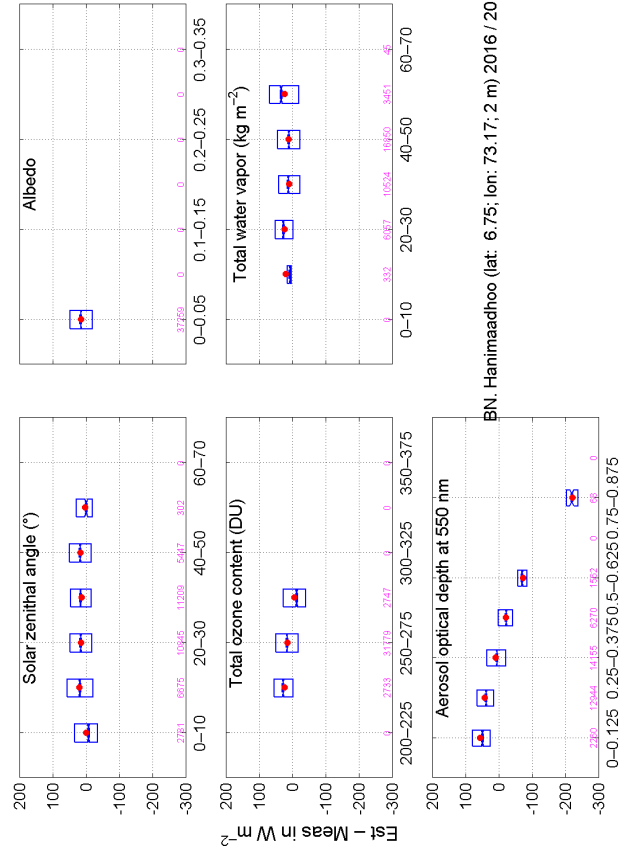

Figure S14: Comparison on direct component at normal irradiance at Hanimaadhoo



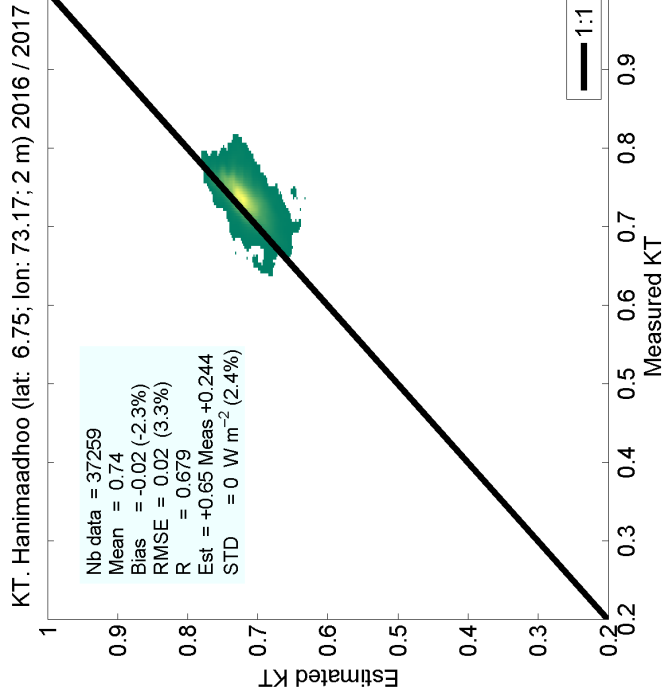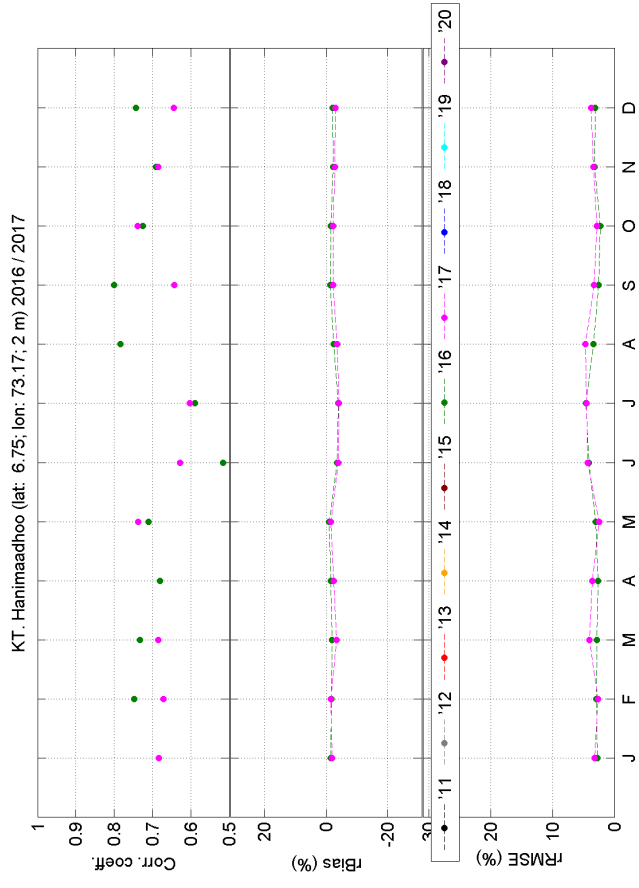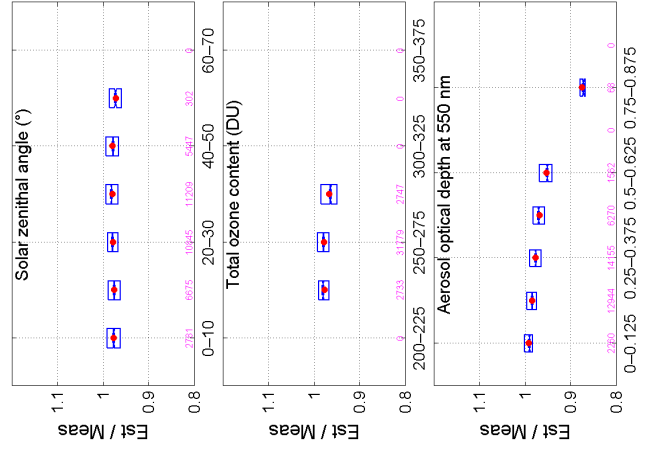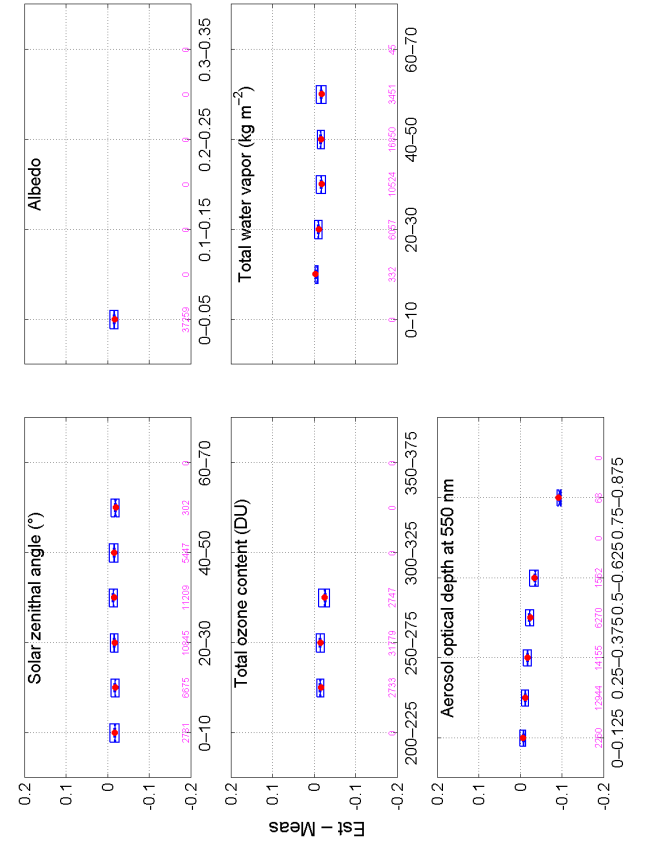

Figure S15: Comparison on clearness index at Hanimaadhoo

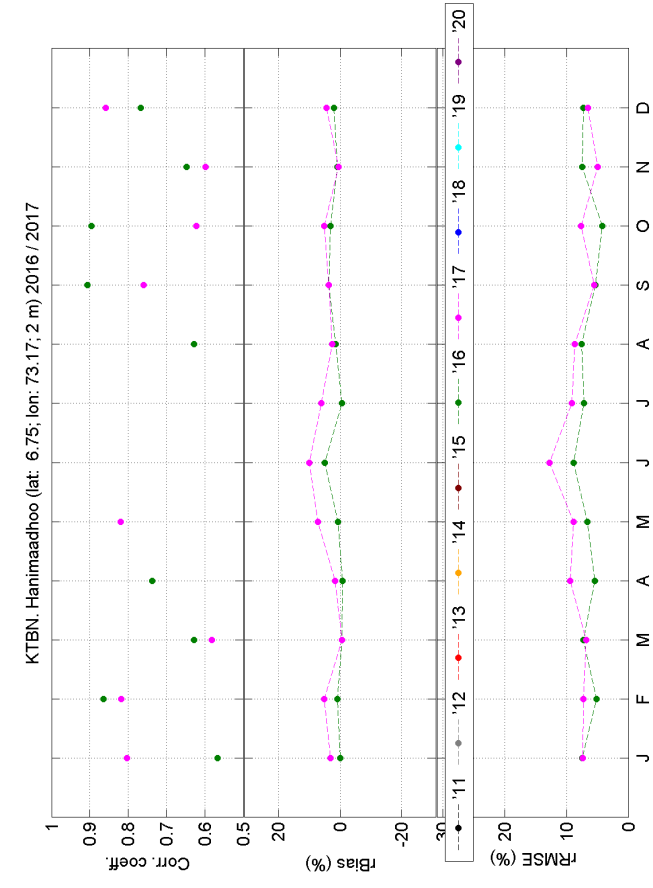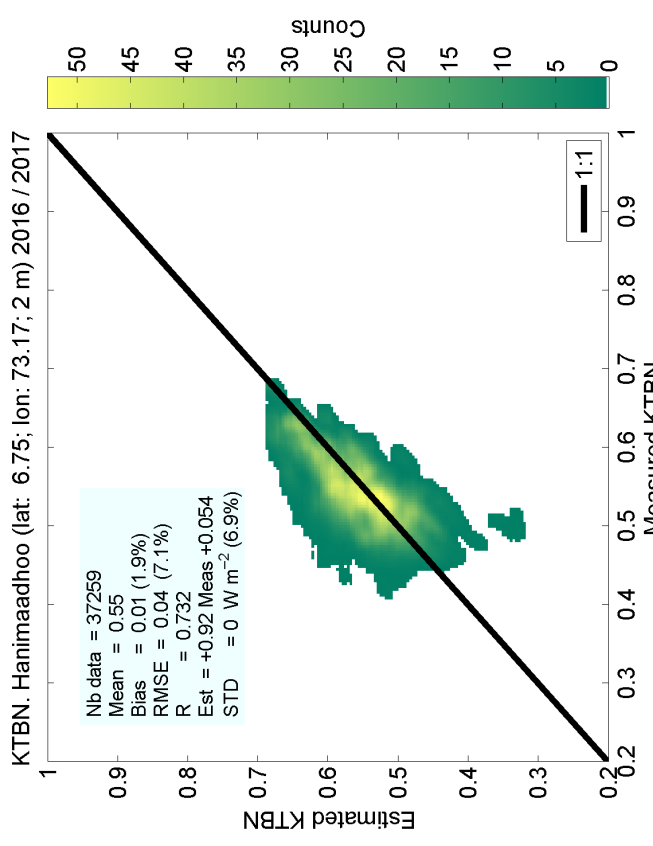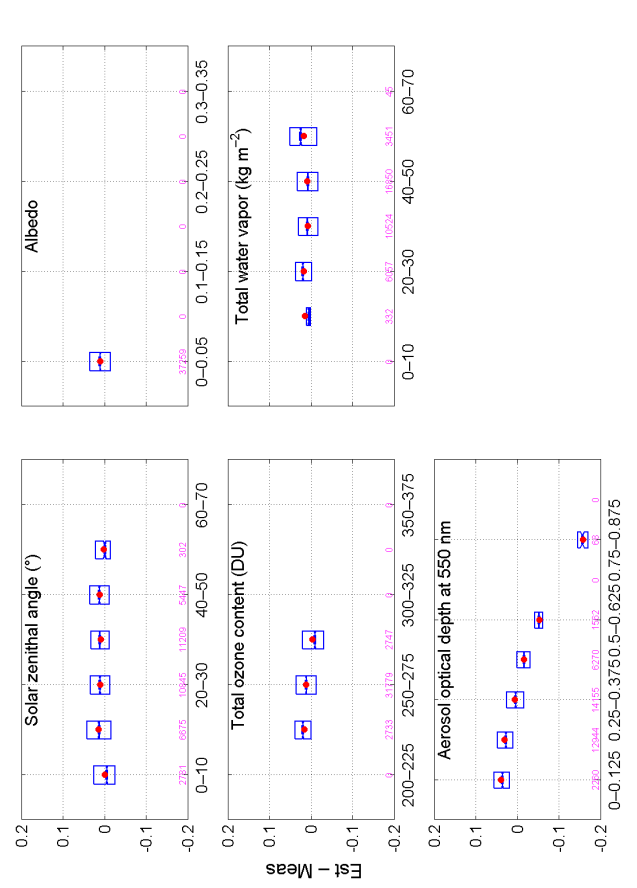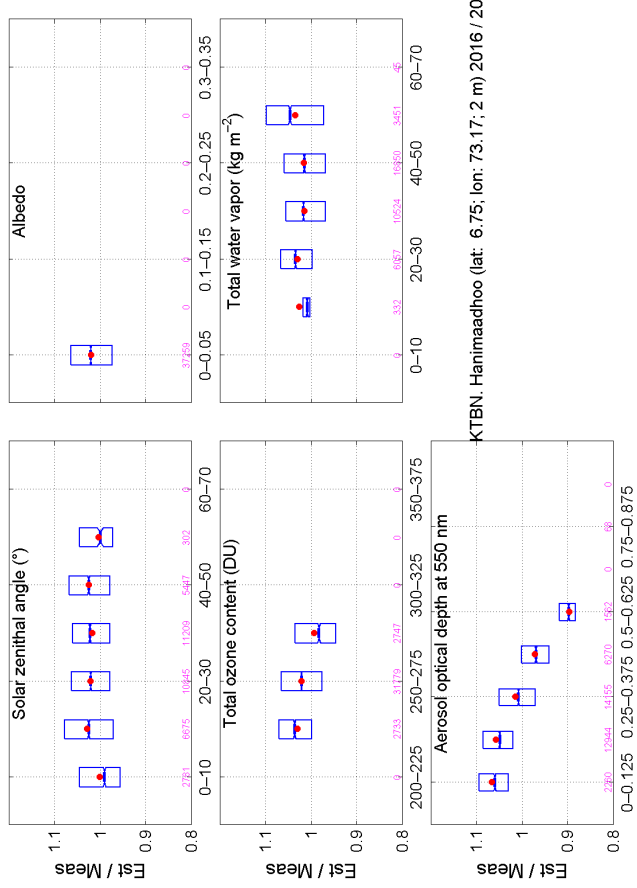

Figure S16: Comparison on direct clearness index at Hanimaadhoo

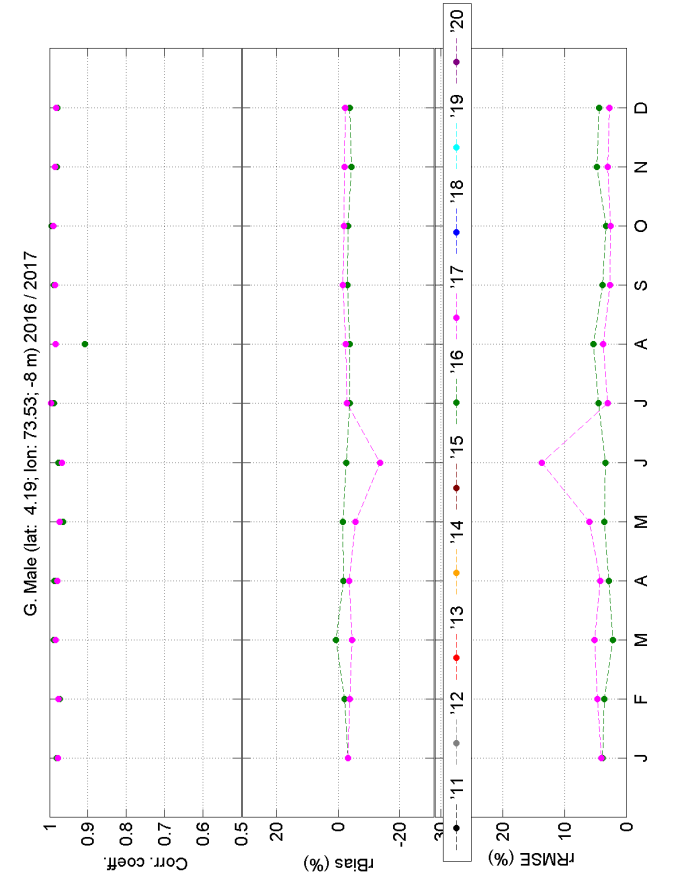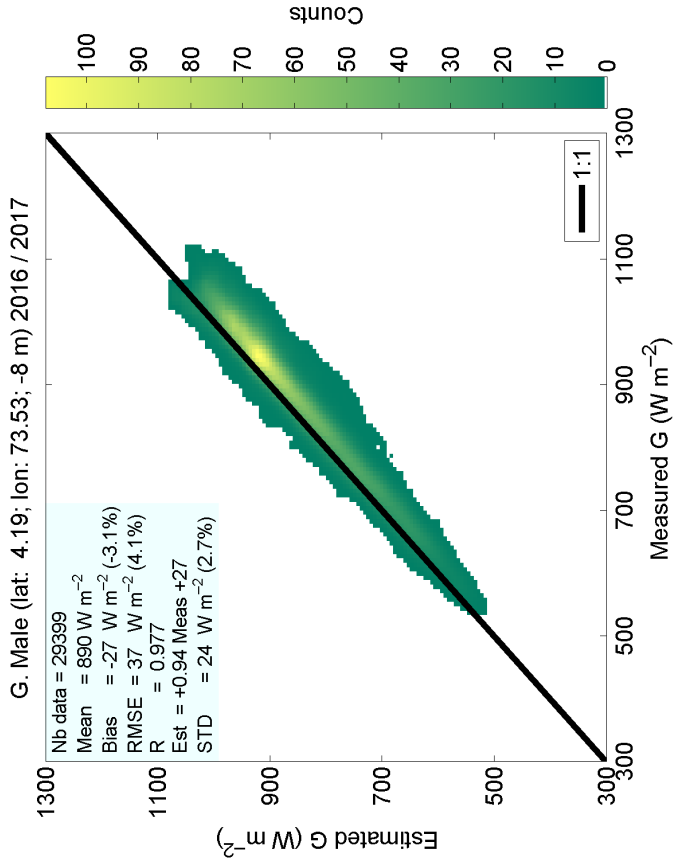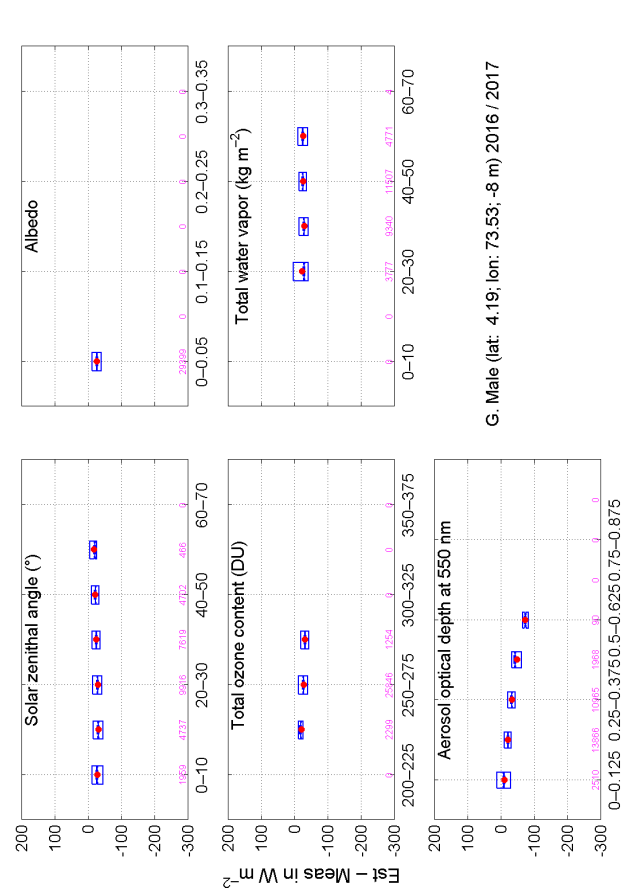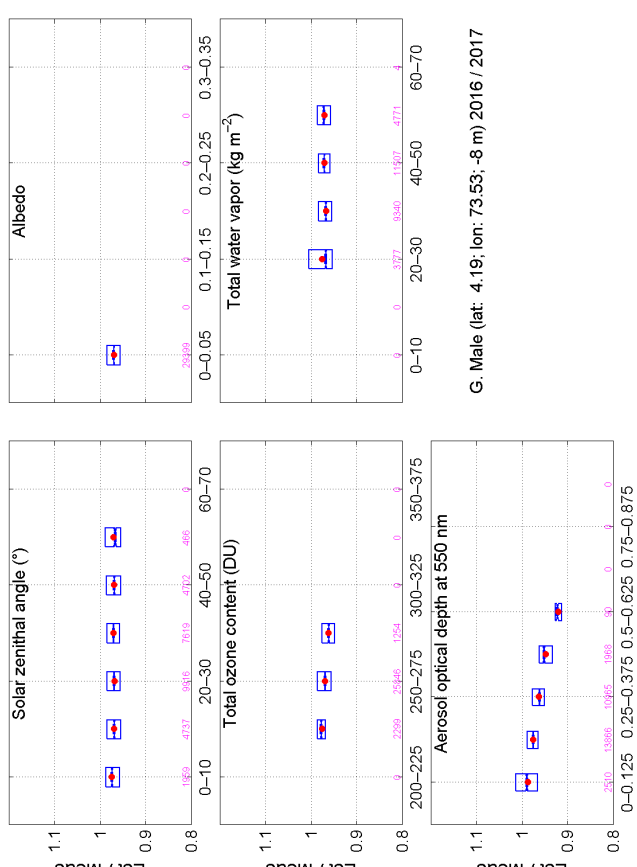

Figure S17: Comparison on global irradiance at Male

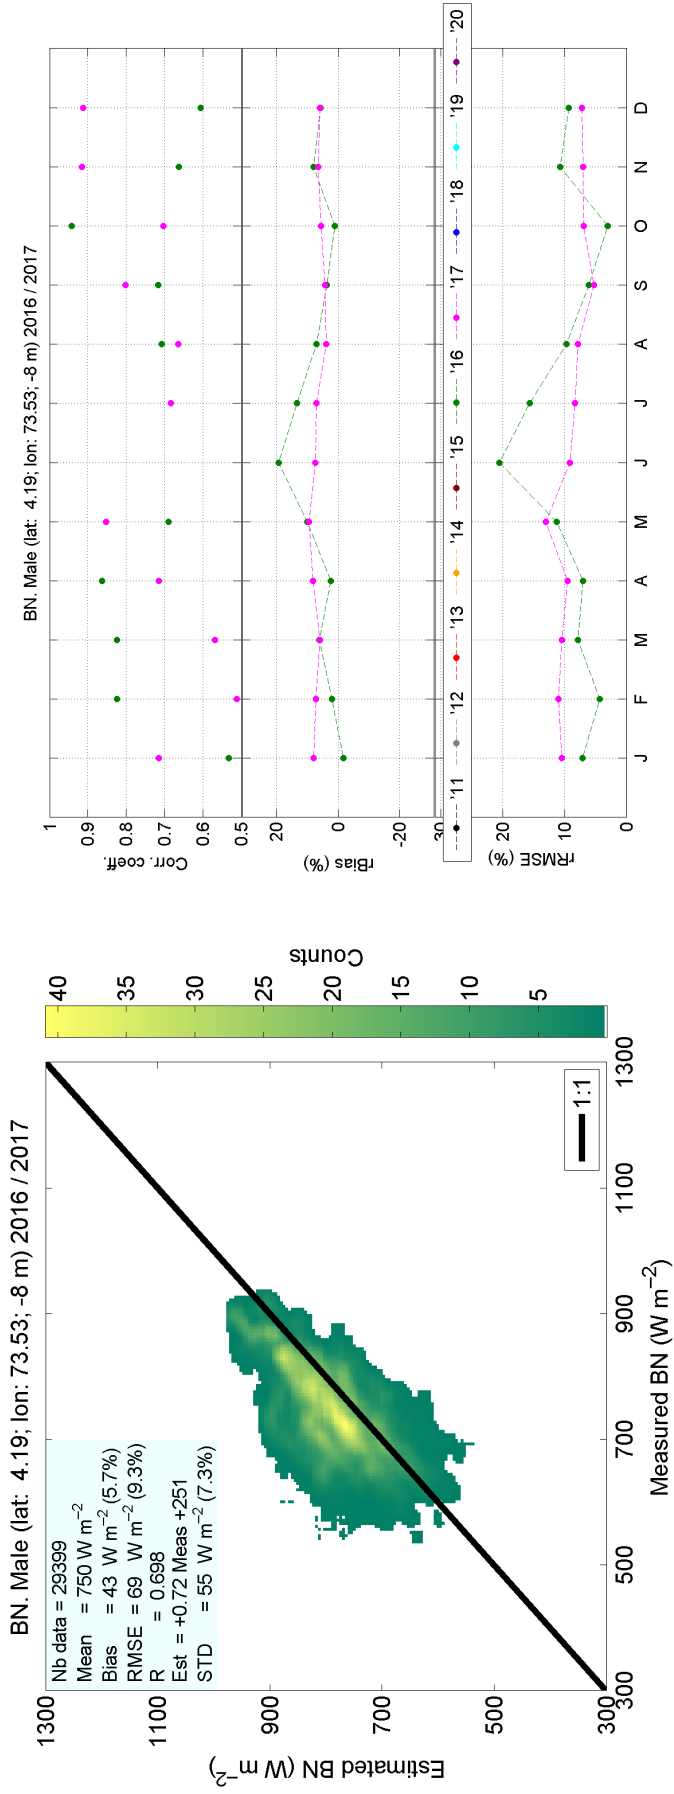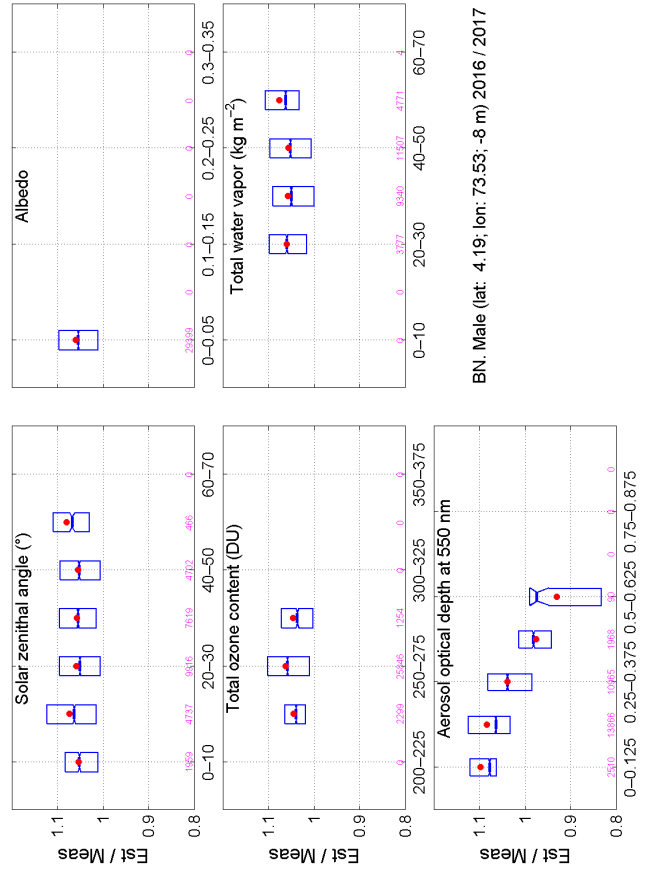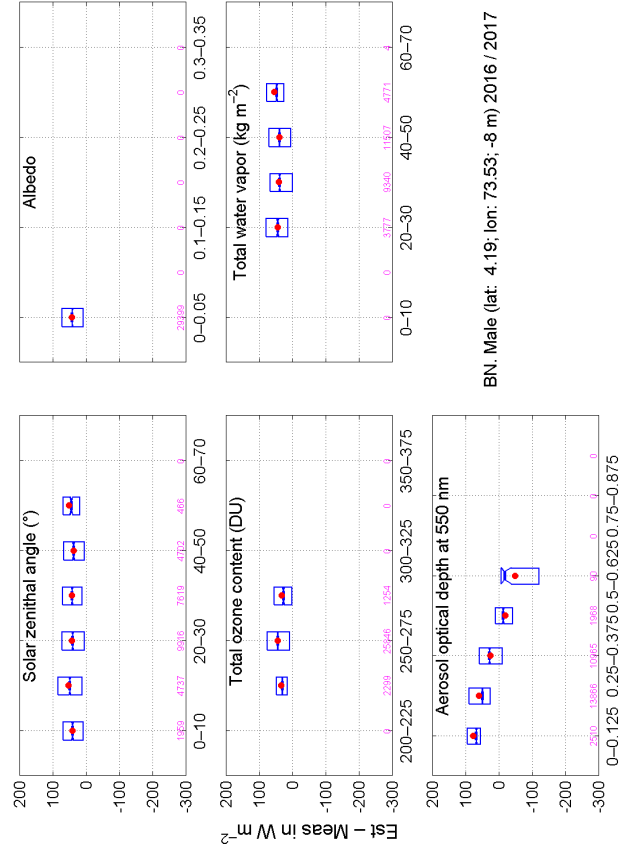

Figure S18: Comparison on direct component at normal irradiance at Male

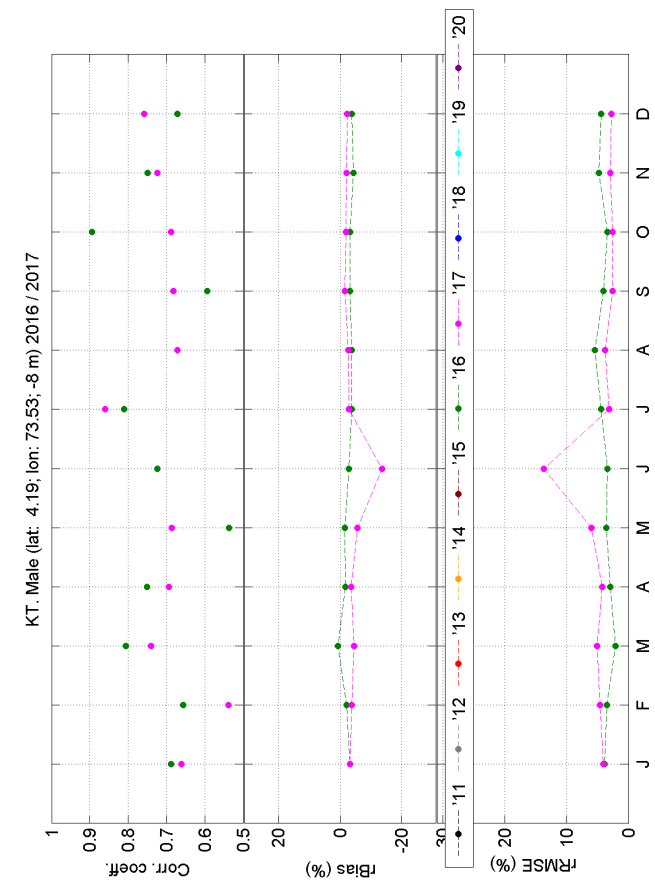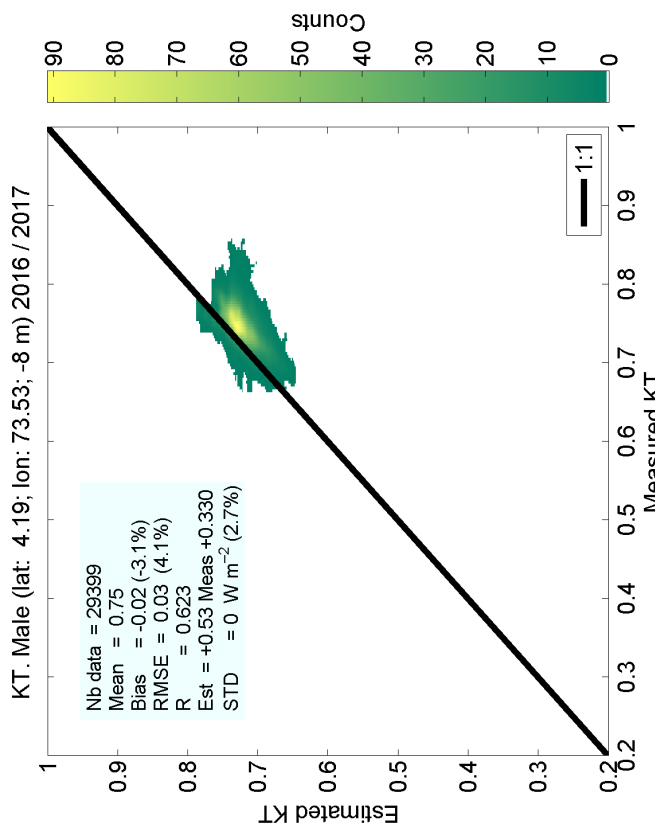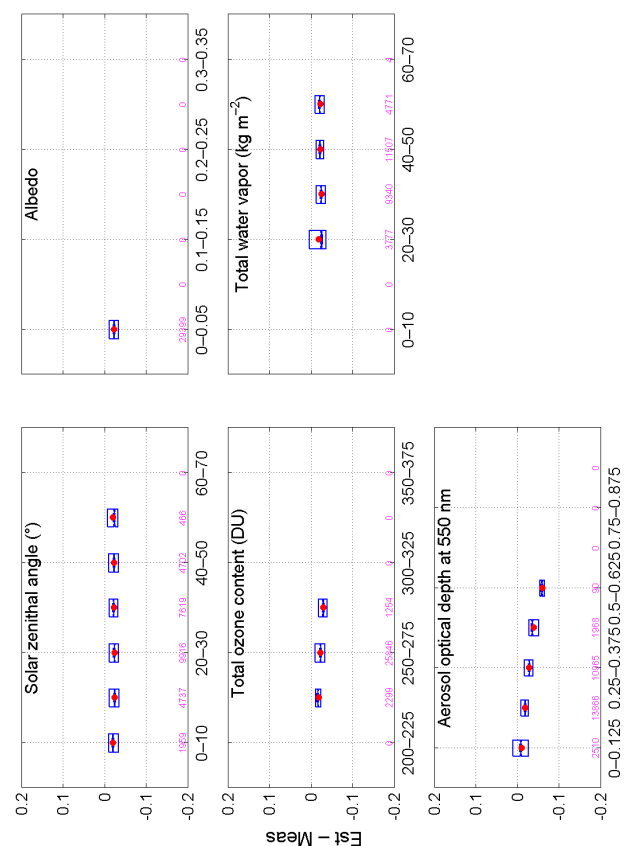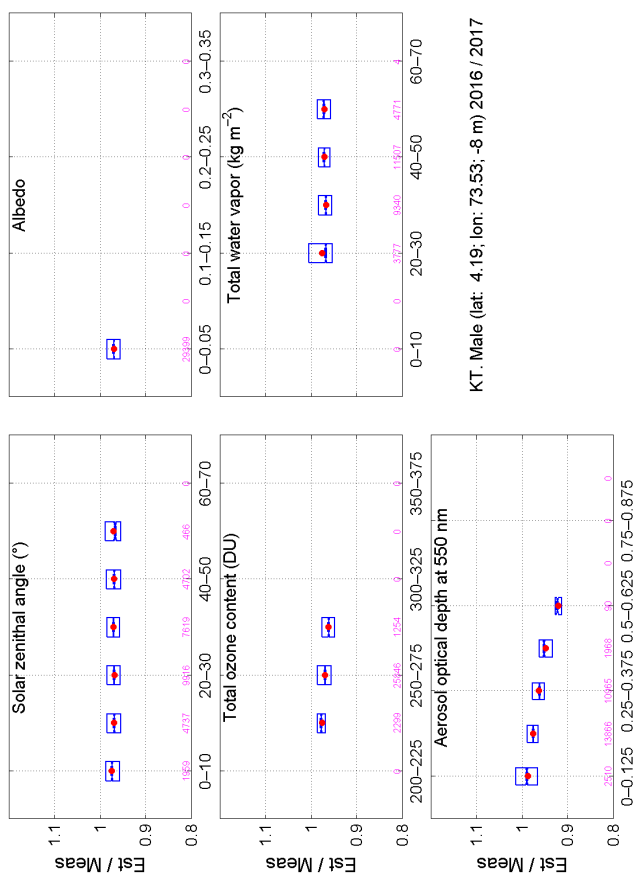

KT. Male (lat: 4.19; lon: 73.53; -8 m) 2016 / 2017

Figure S19: Comparison on clearness index at Male

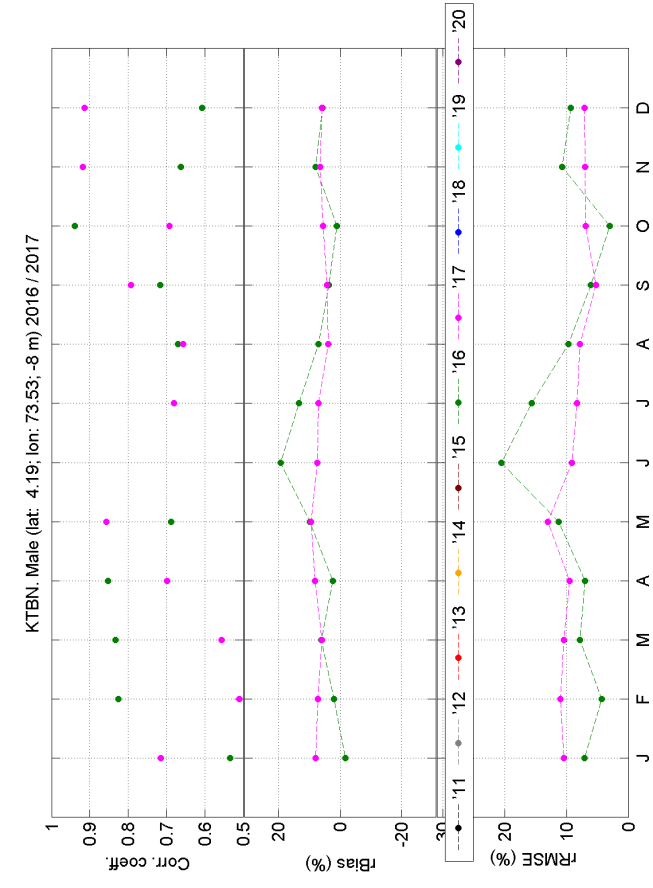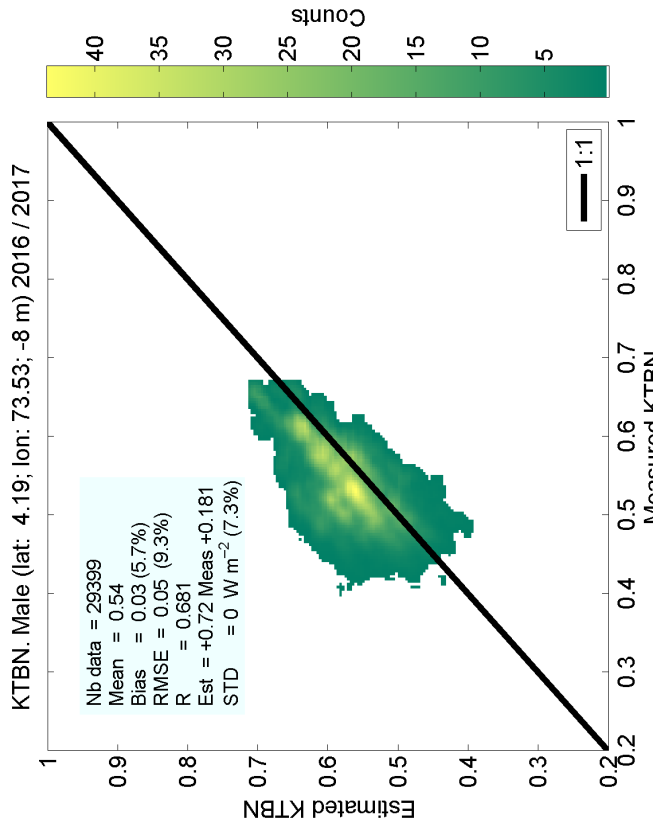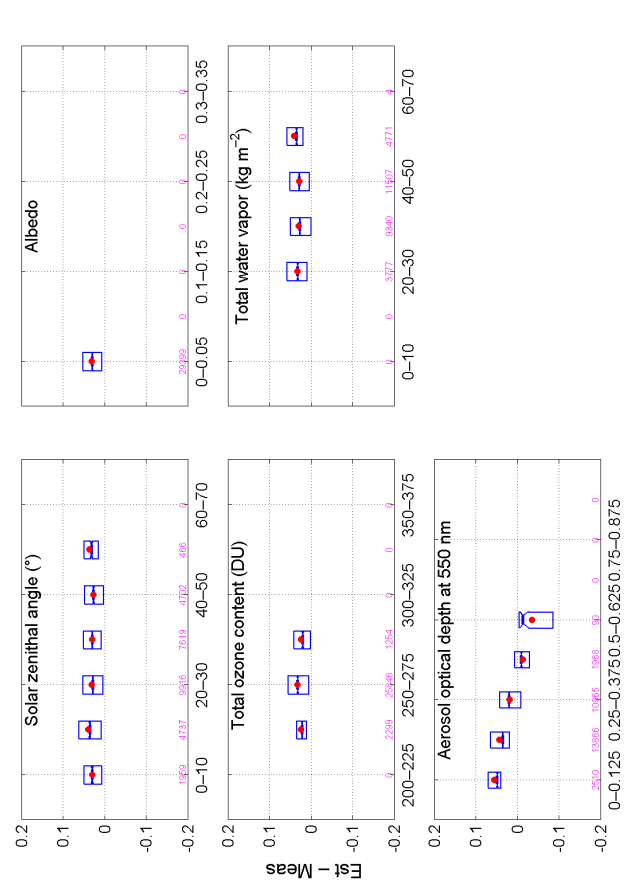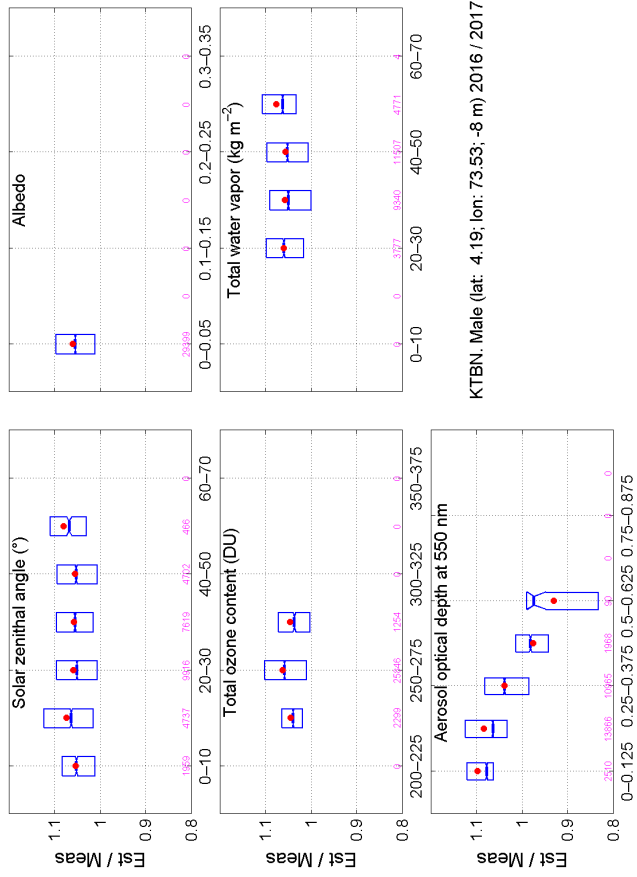

Figure S20: Comparison on direct clearness index at Male

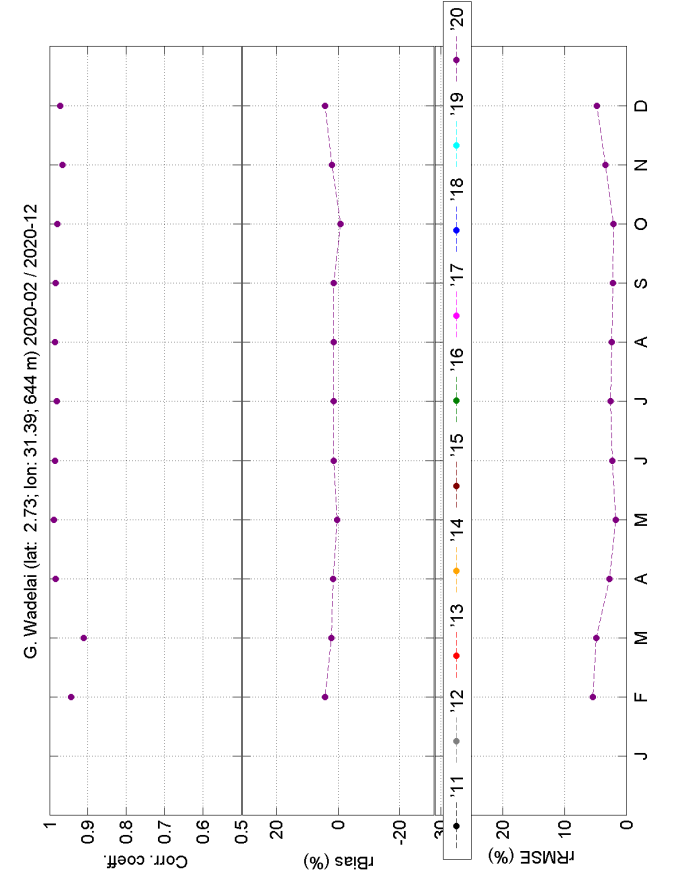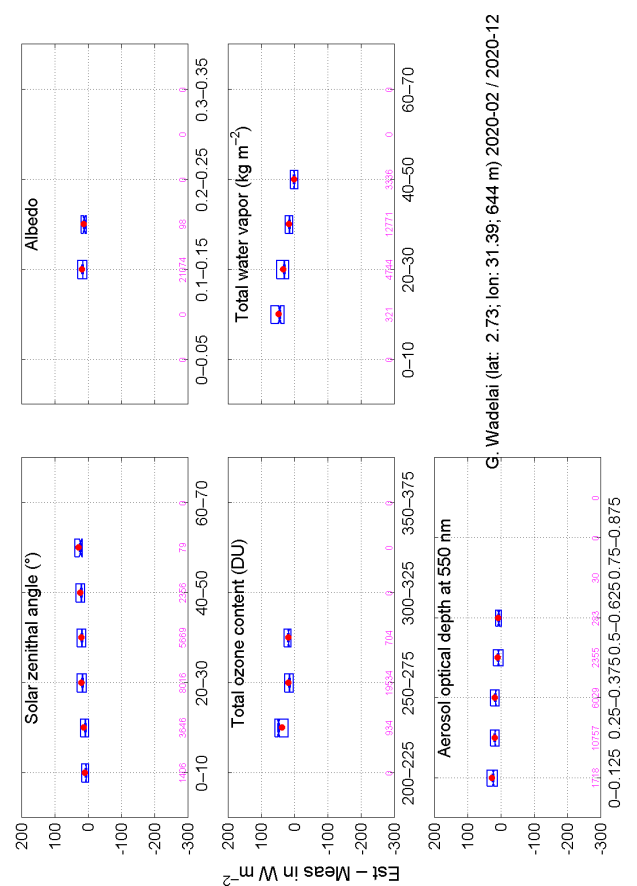

Figure S21: Comparison on global irradiance at Wadelai

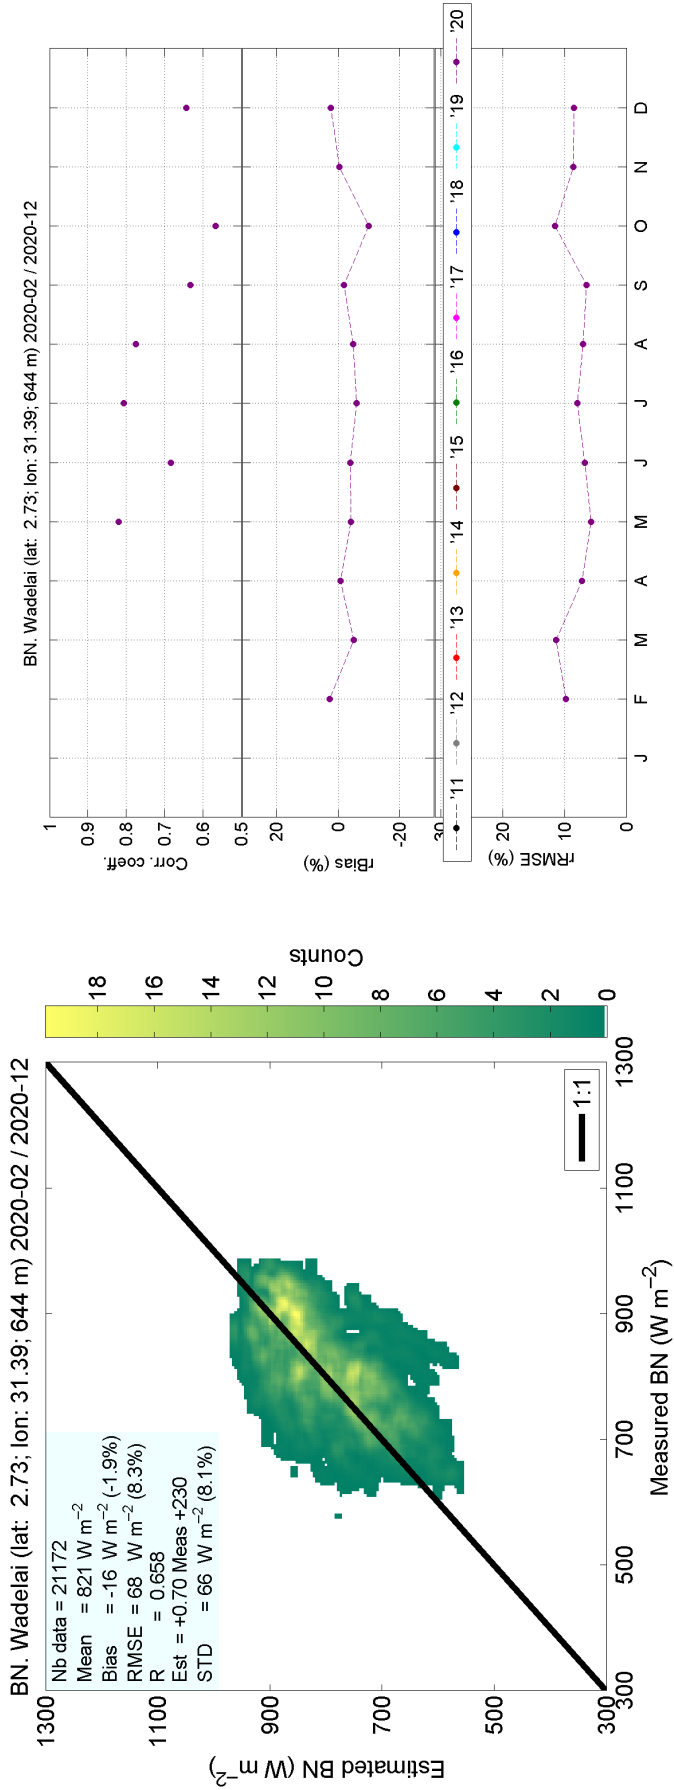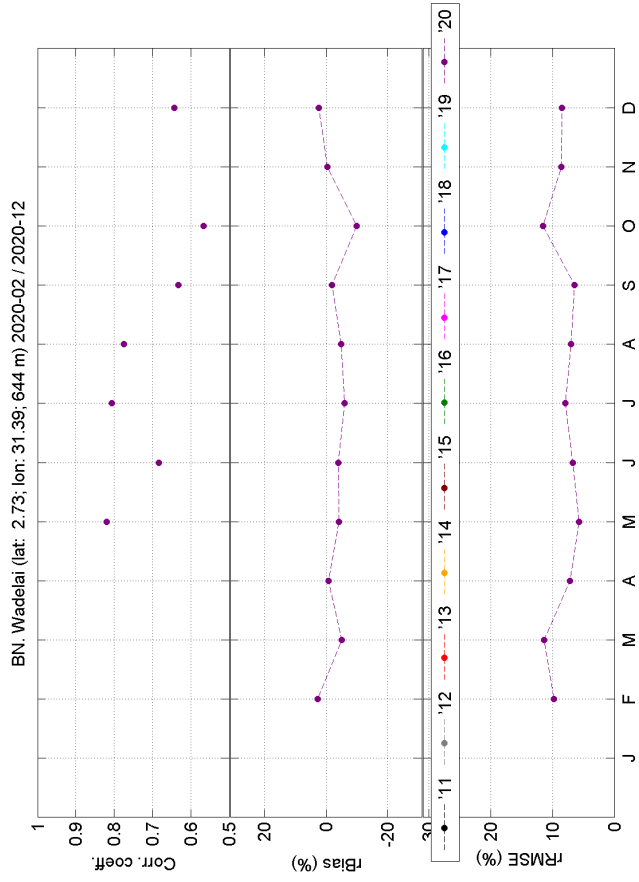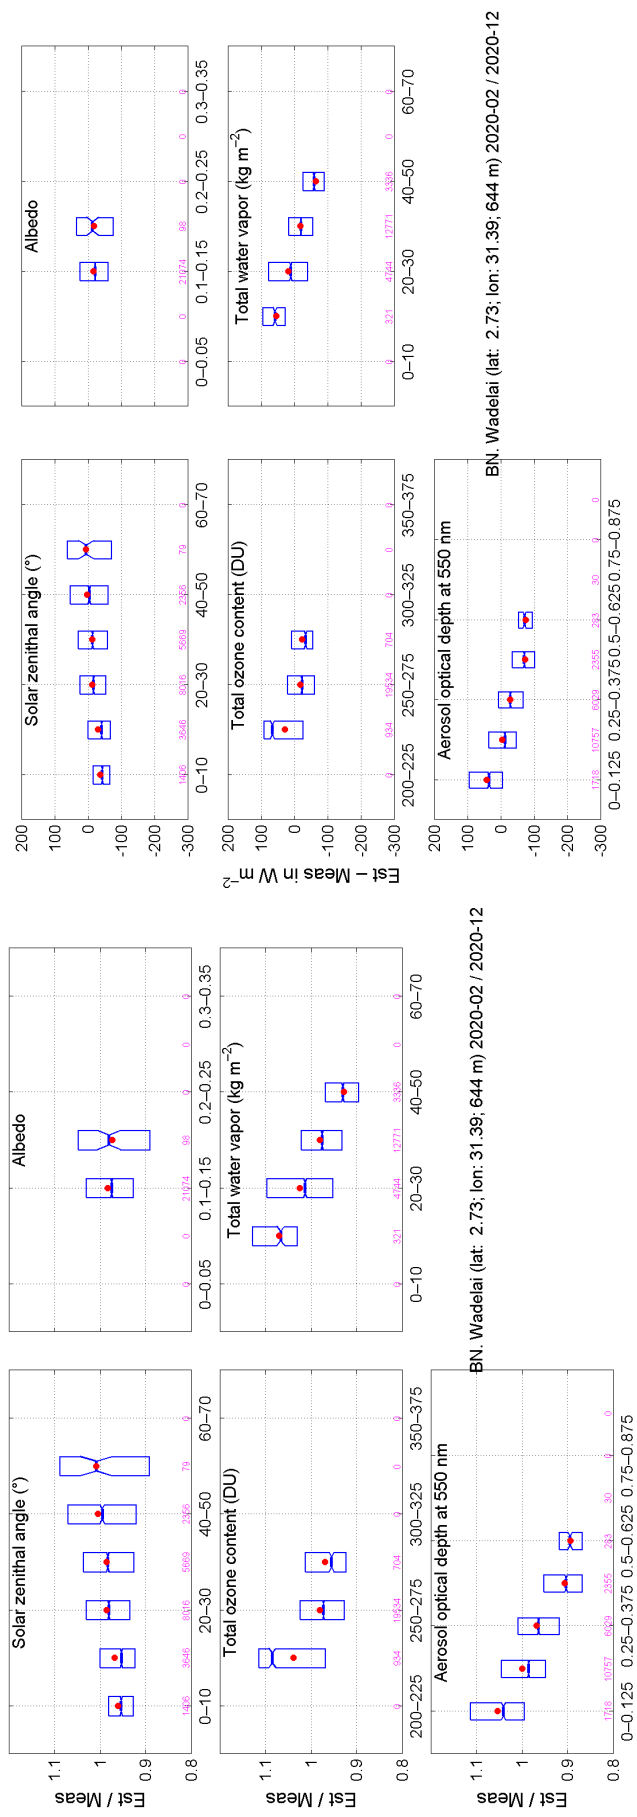

Figure S22: Comparison on direct component at normal irradiance at Wadelai



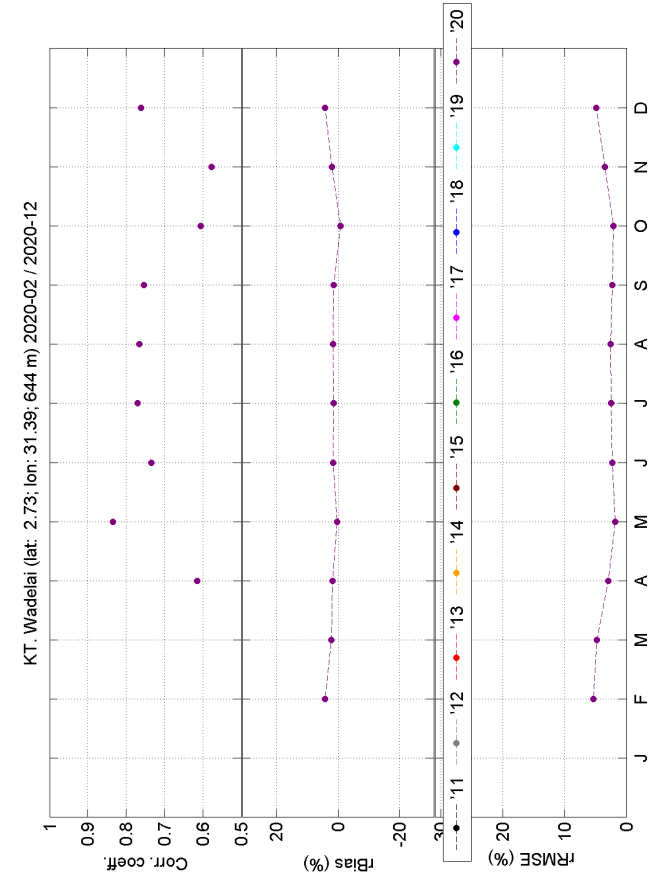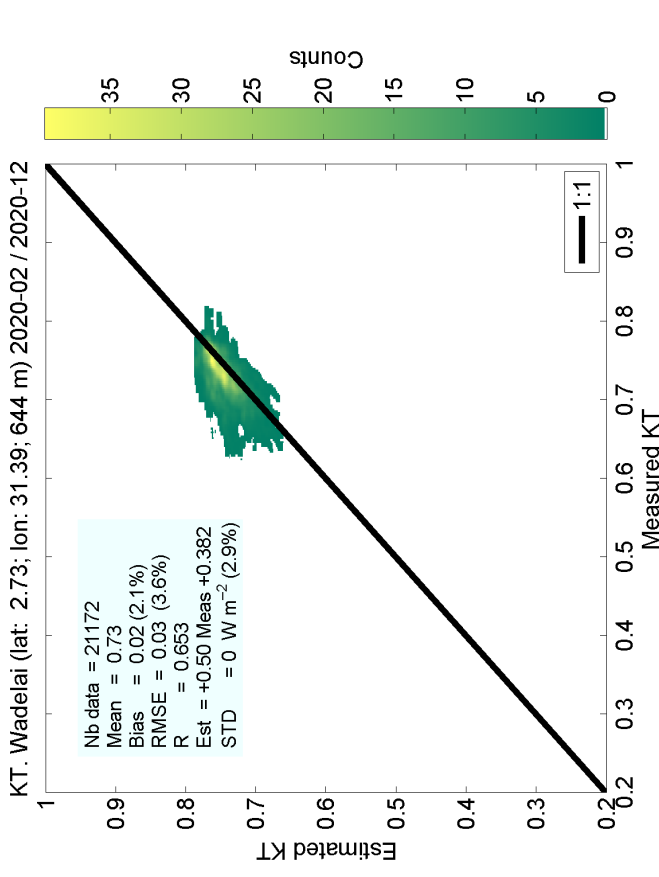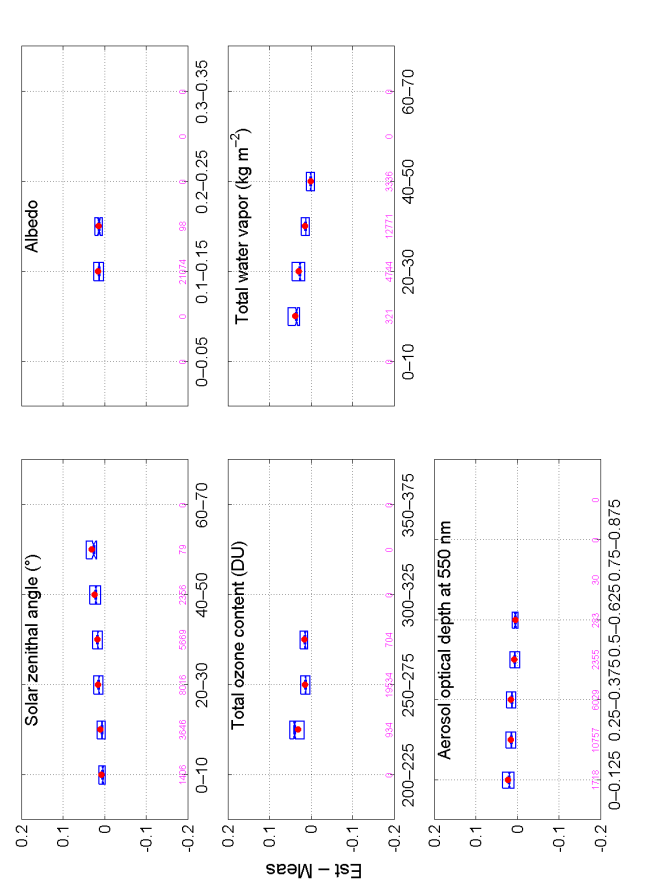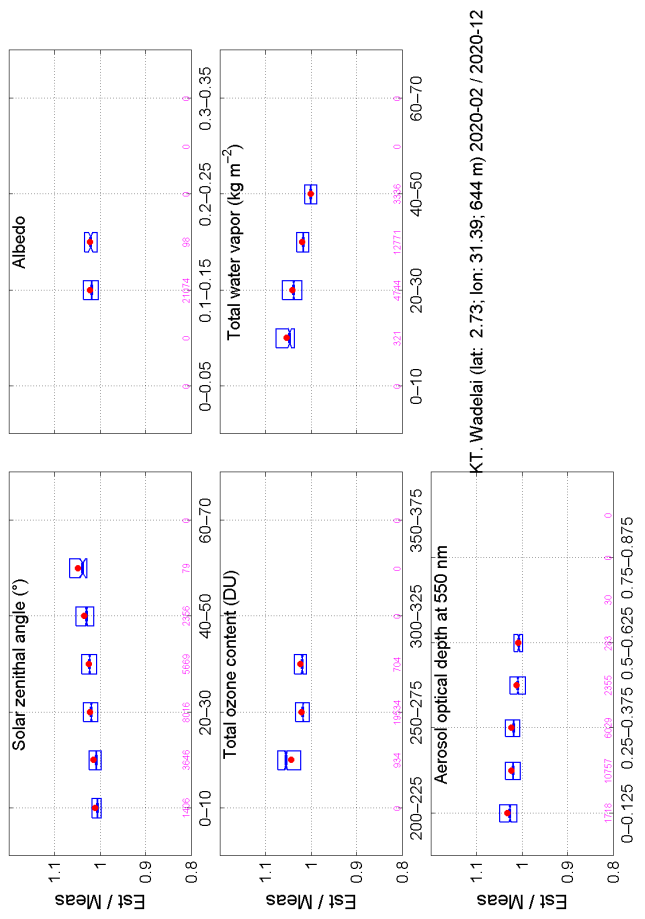

Figure S23: Comparison on clearness index at Wadelai

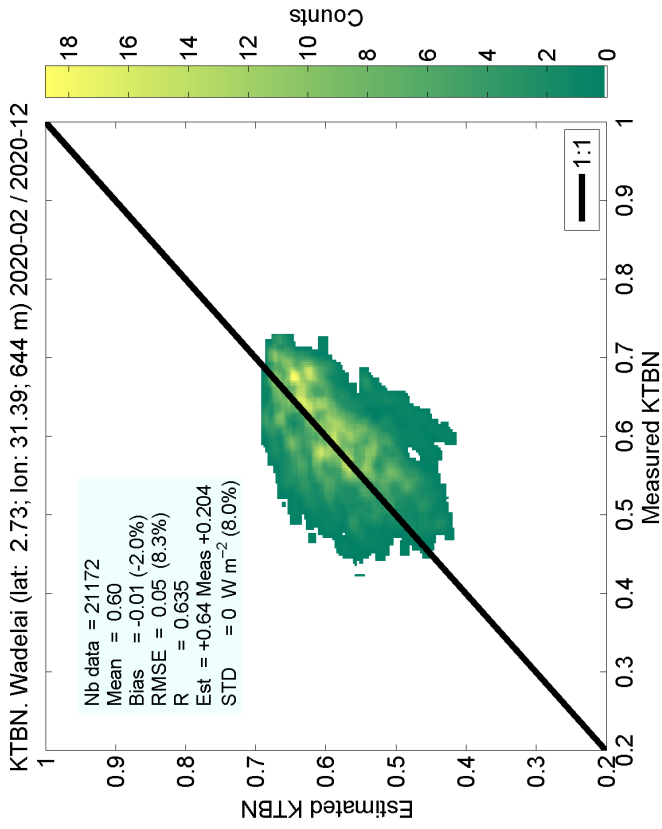

KTBN, Wadelai (lat: 2.73; lon: 31.39; 644 m) 2020-02 / 2020-12

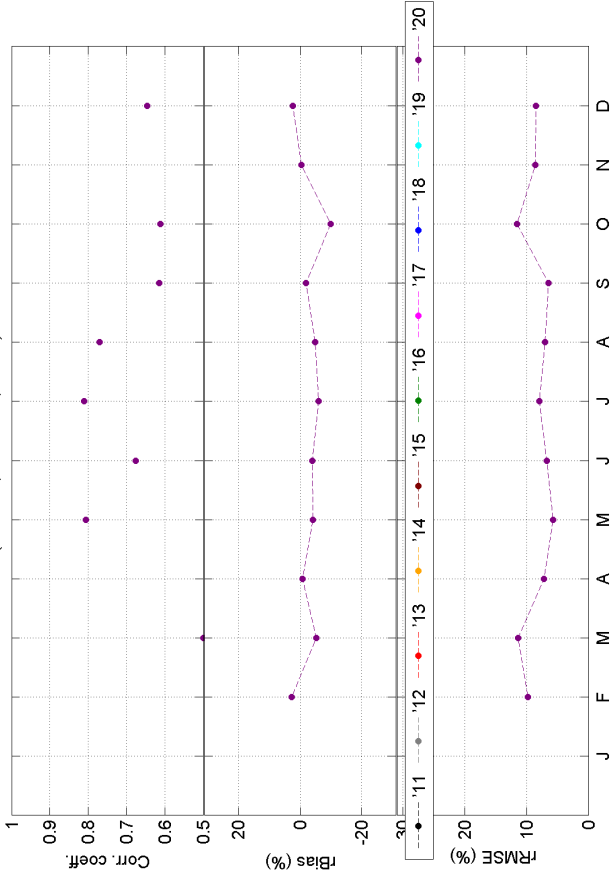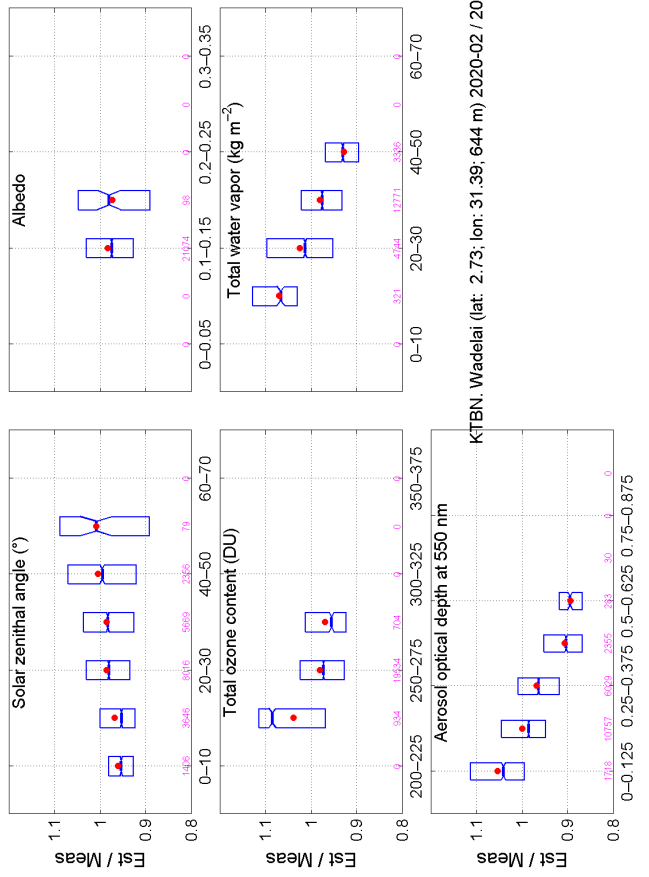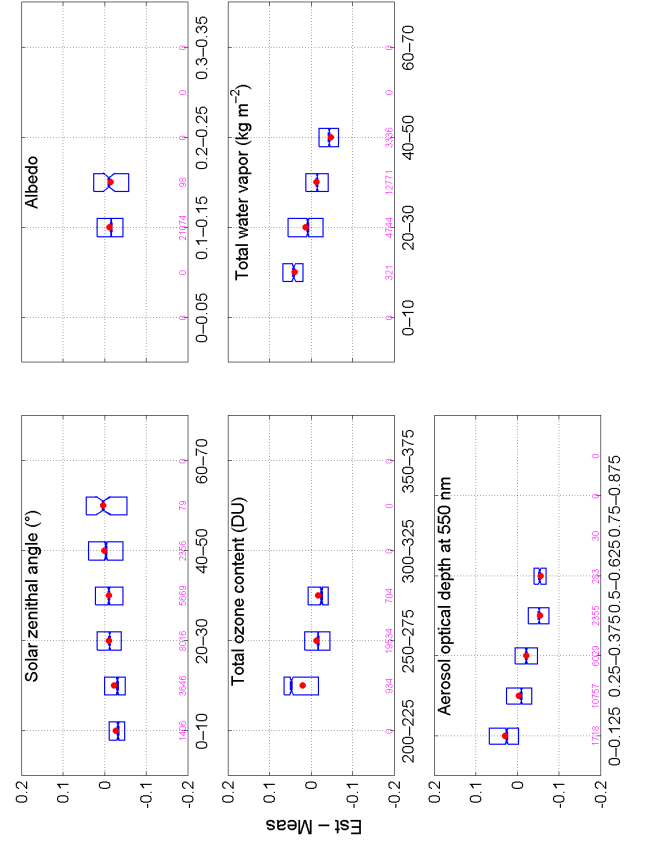

Figure S24: Comparison on direct clearness index at Wadelai

G. Kadhoo (lat: 1.86; lon: 73.52; 0 m) 2017

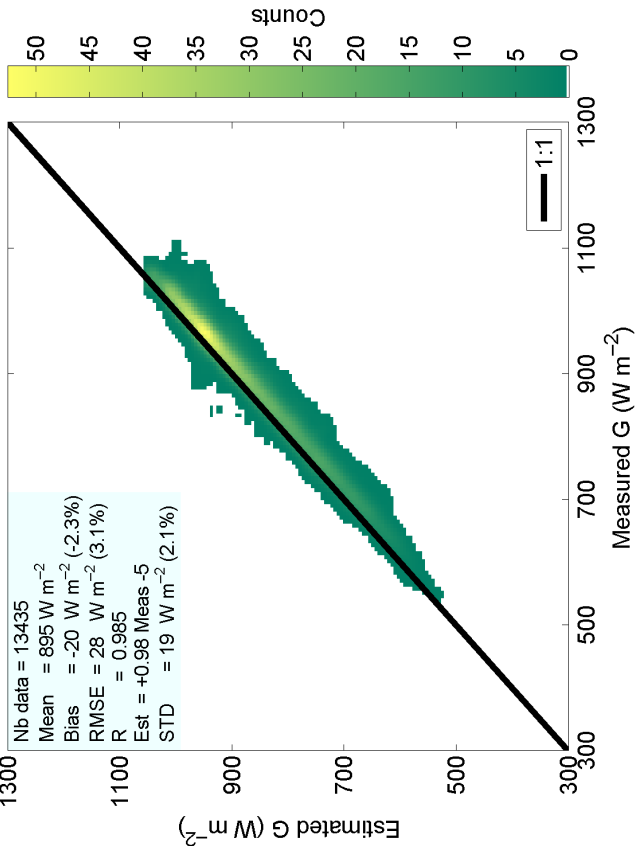

G. Kadhoo (lat: 1.86; lon: 73.52; 0 m) 2017

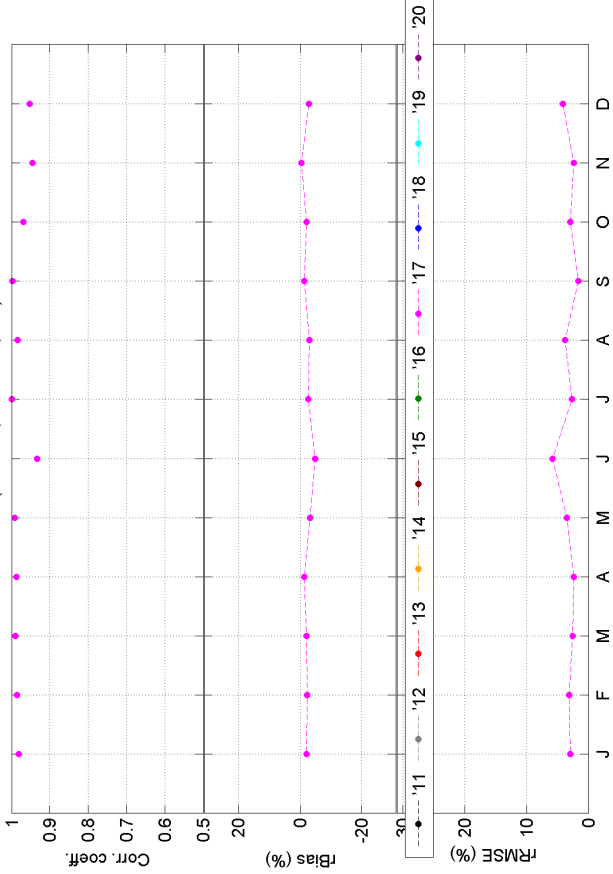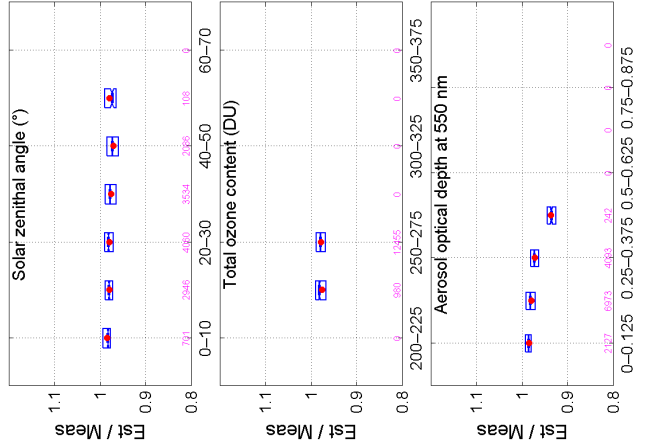

G. Kadhoo (lat: 1.86; lon: 73.52; 0 m) 2017

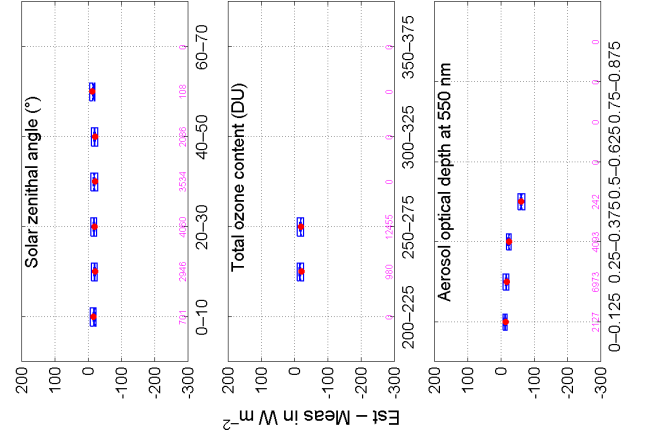

G. Kadhoo (lat: 1.86; lon: 73.52; 0 m) 2017

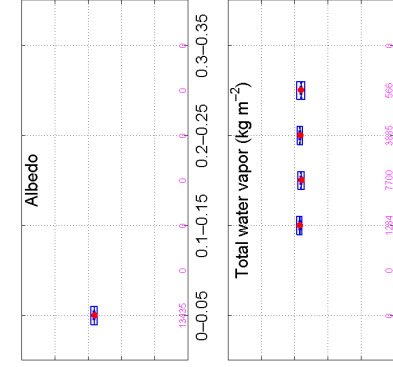

Figure S25: Comparison on global irradiance at Kadhoo

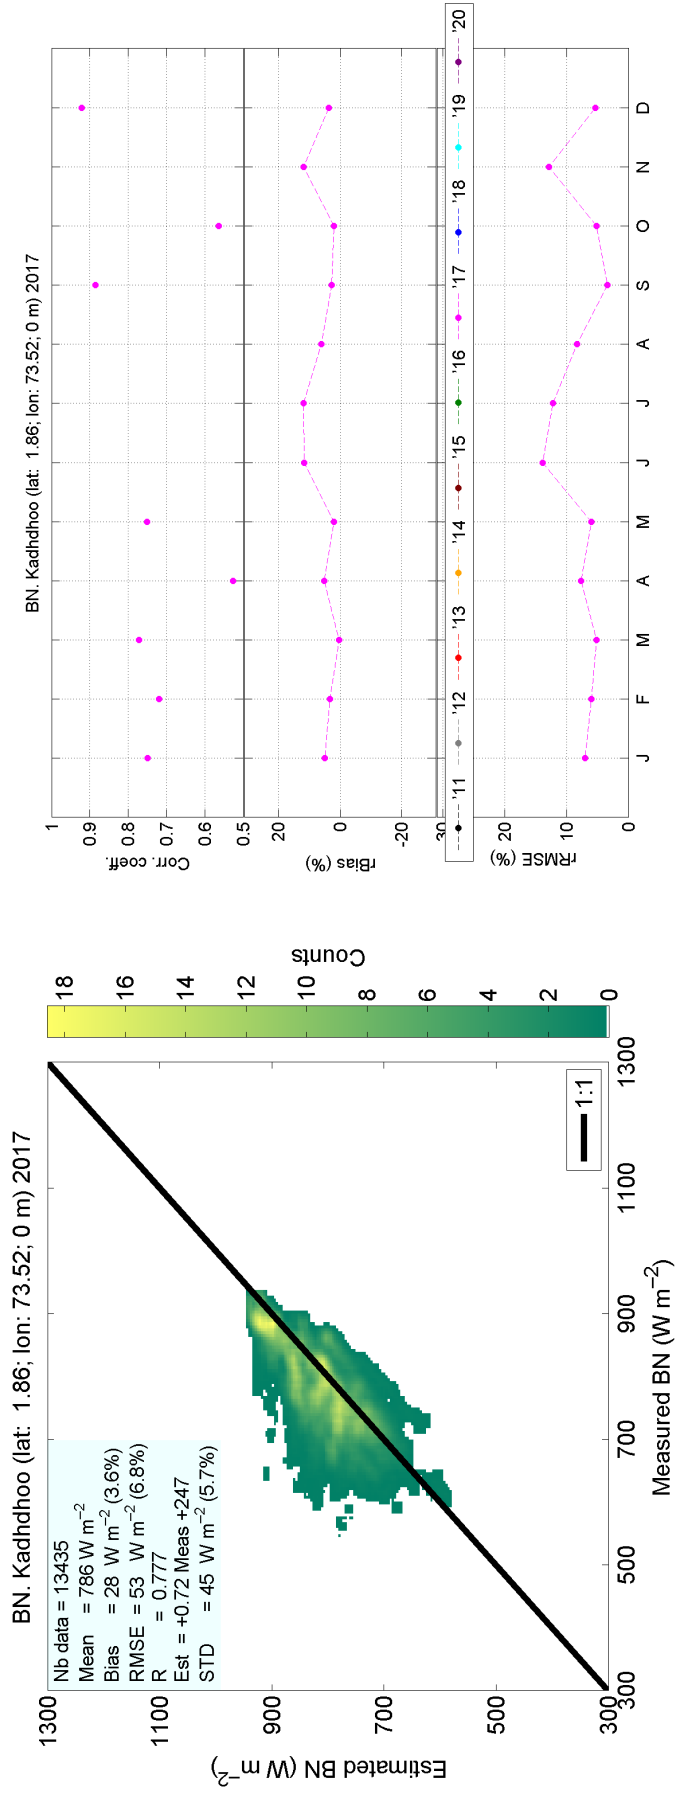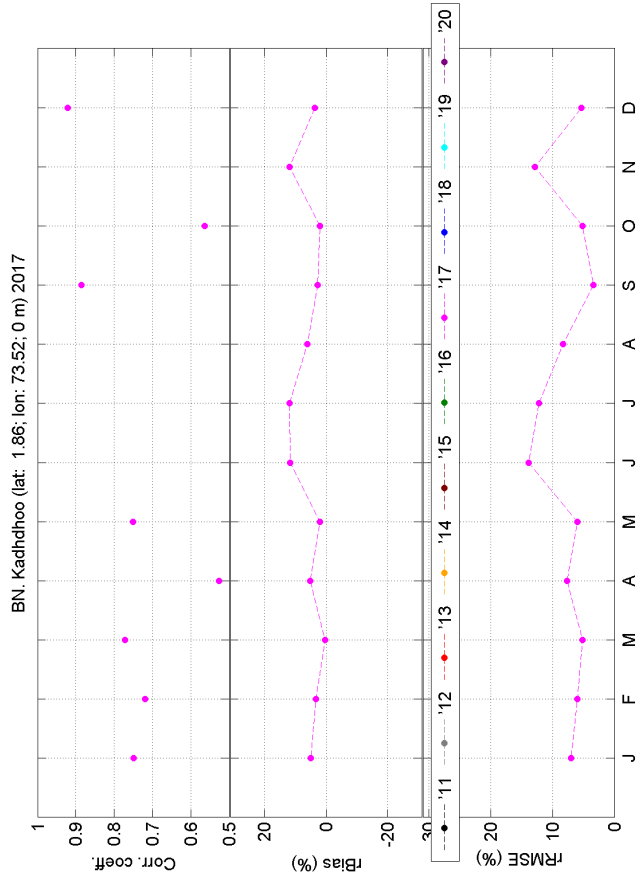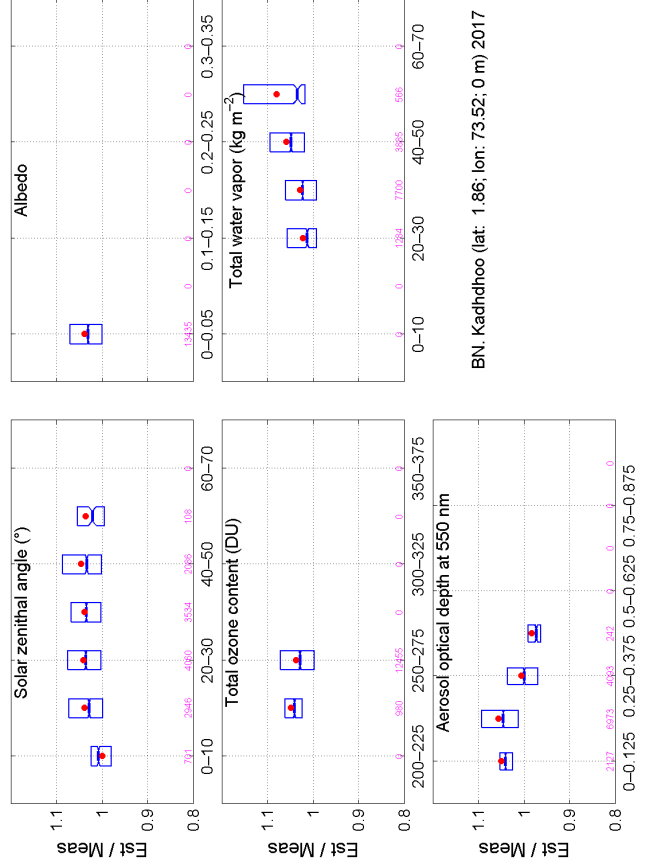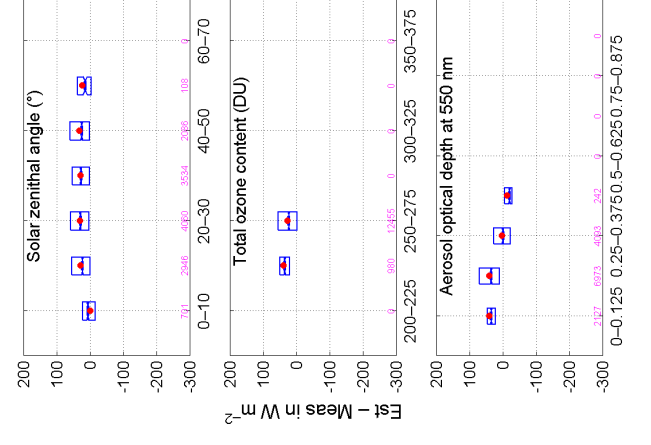

Figure S26: Comparison on direct component at normal irradiance at Kadhoo

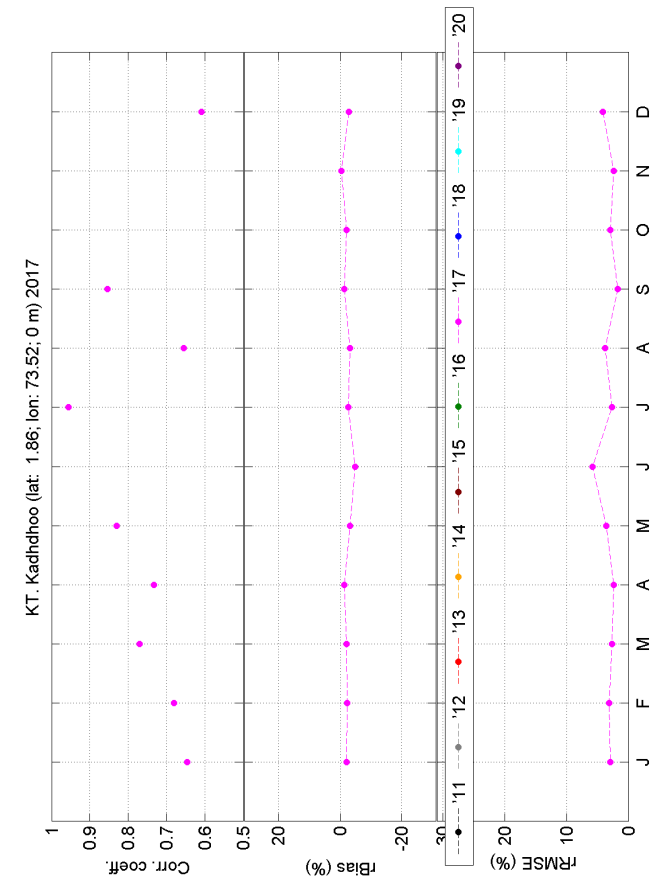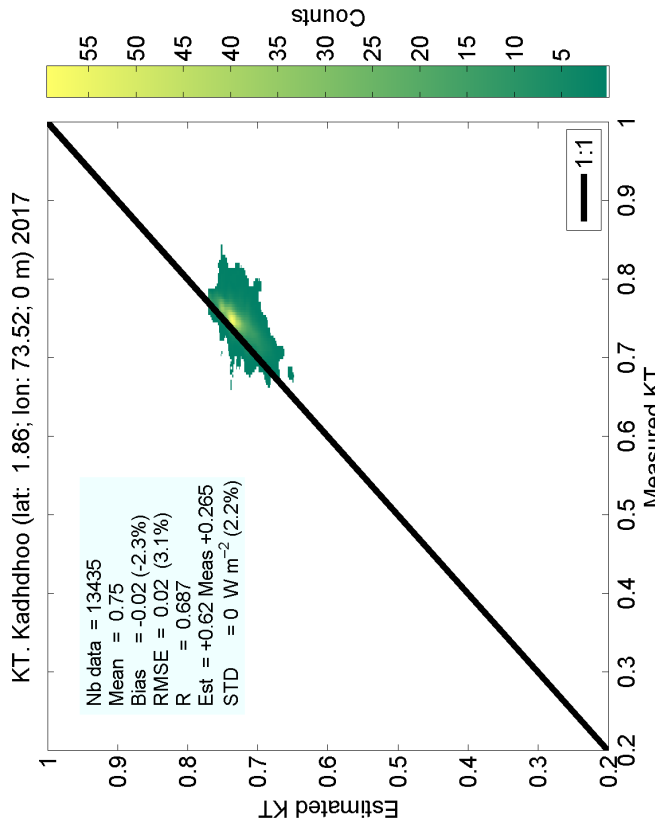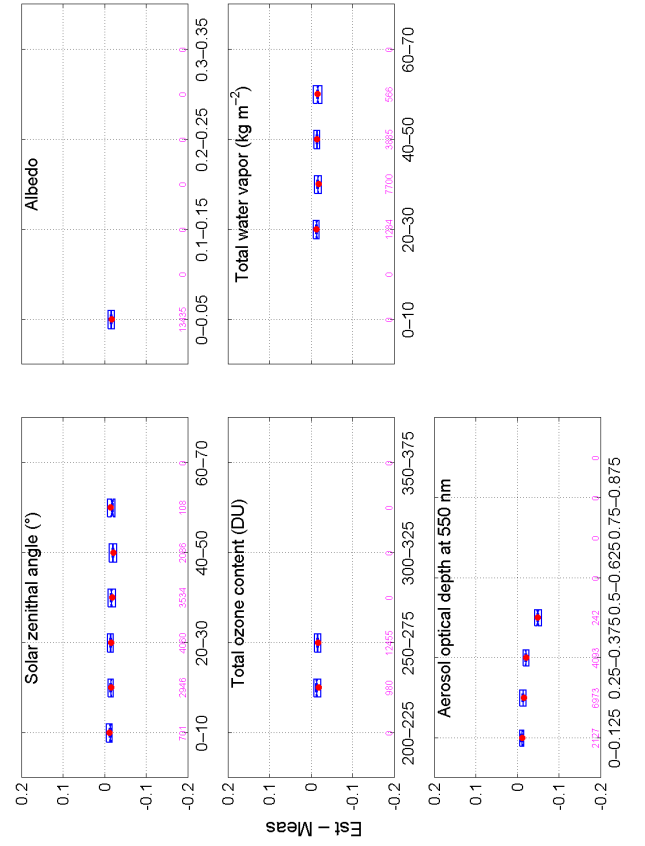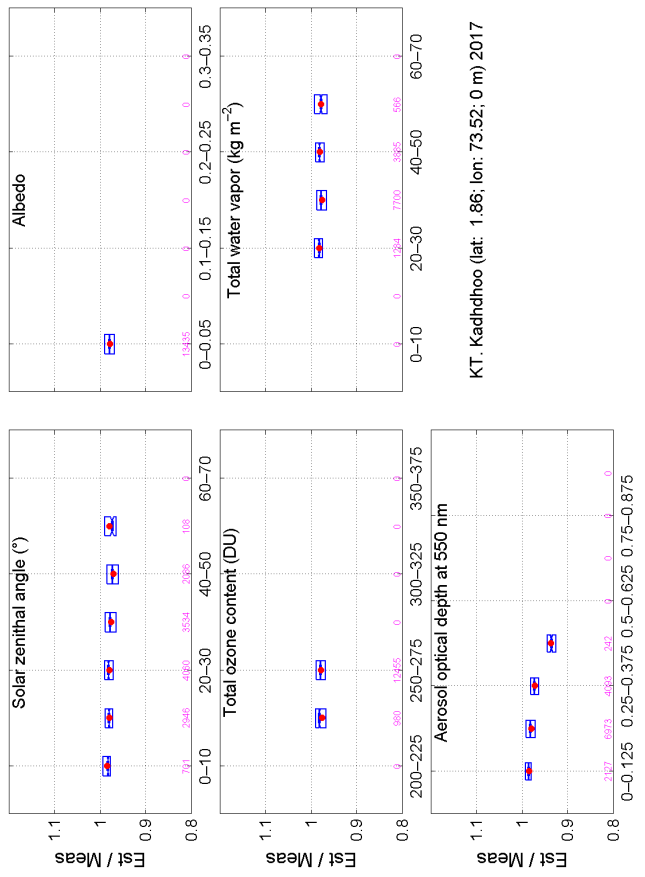

Figure S27: Comparison on clearness index at Kadhoo

KTBN, Kadhoo (lat: 1.86; lon: 73.52; 0 m) 2017

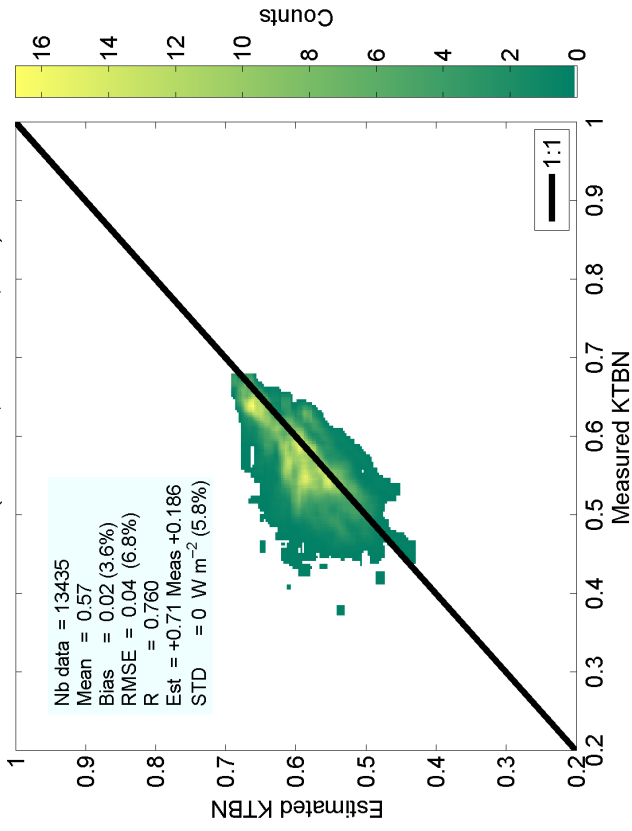

KTBN, Kadhoo (lat: 1.86; lon: 73.52; 0 m) 2017

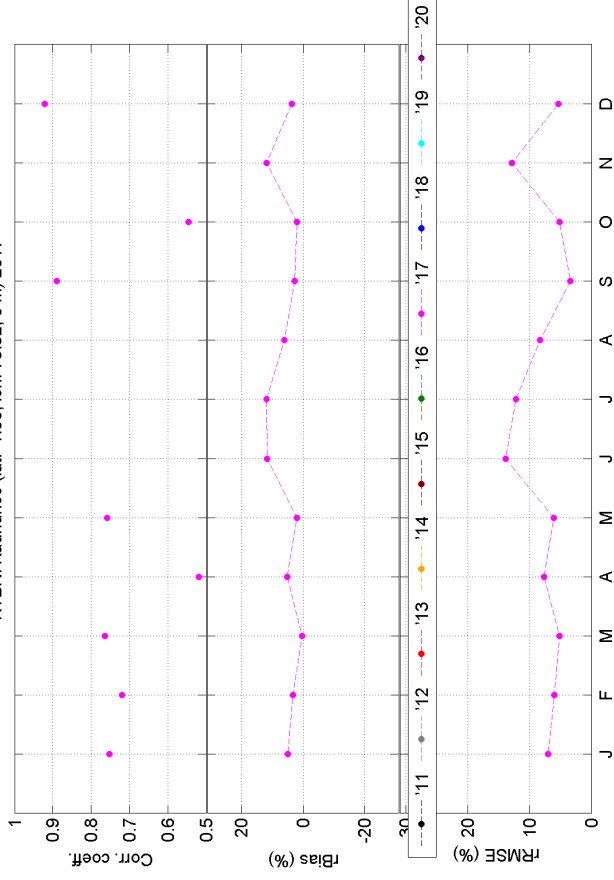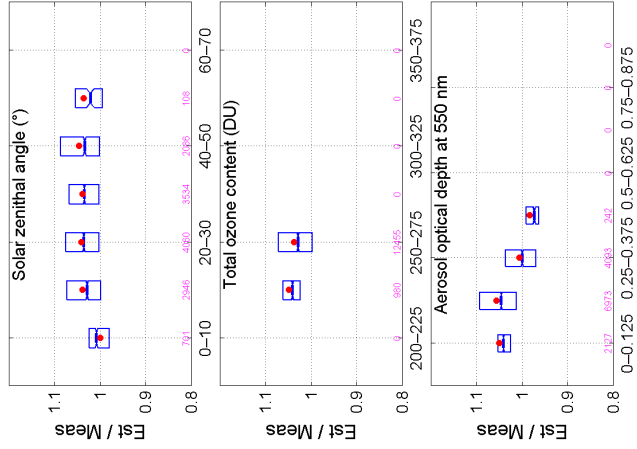

KTBN, Kadhoo (lat: 1.86; lon: 73.52; 0 m) 2017

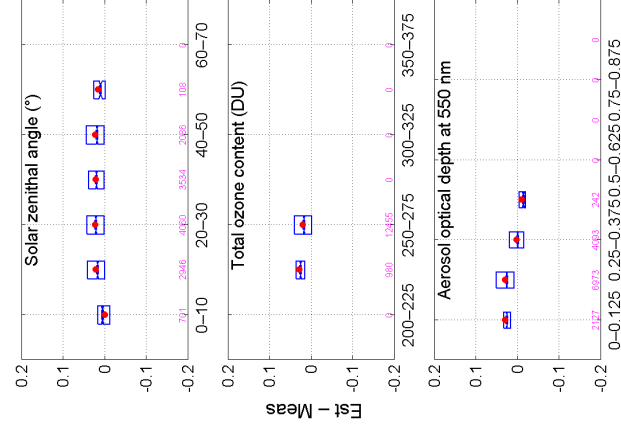

Figure S28: Comparison on direct clearness index at Kadhoo

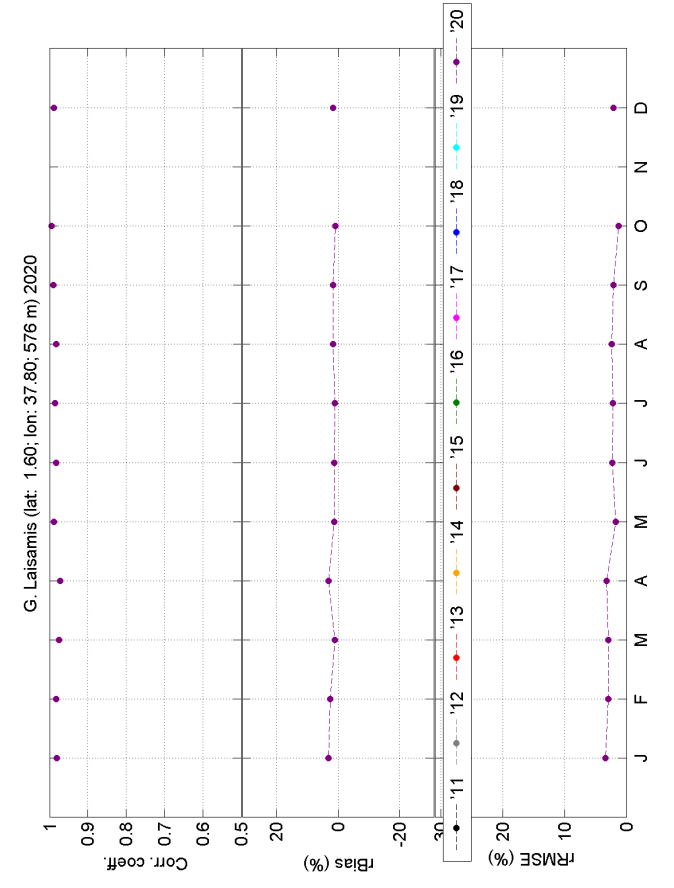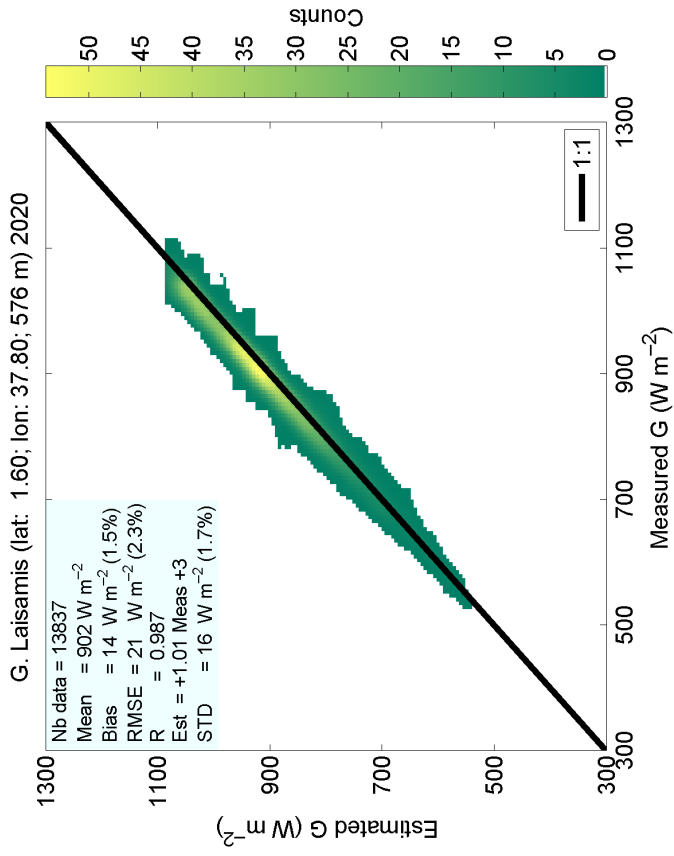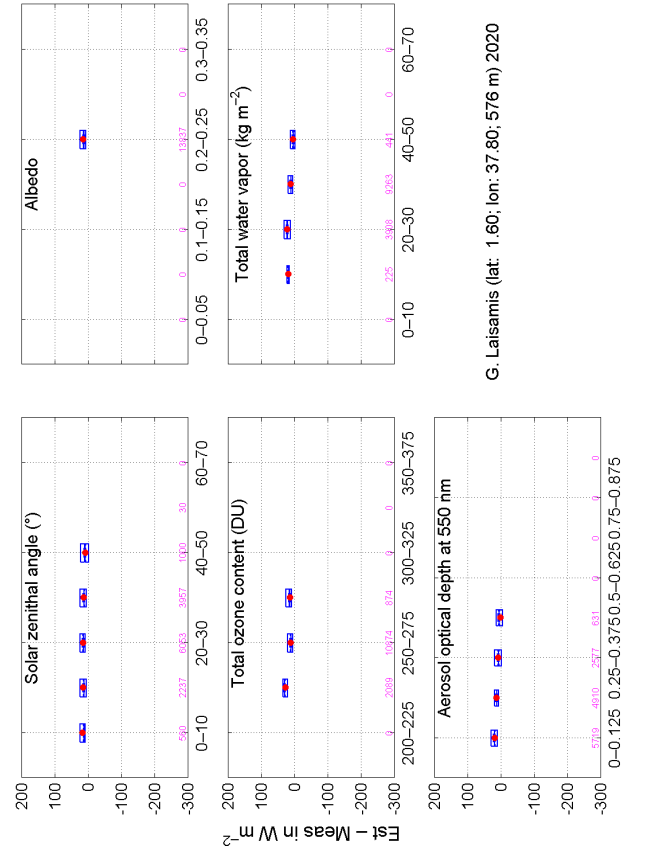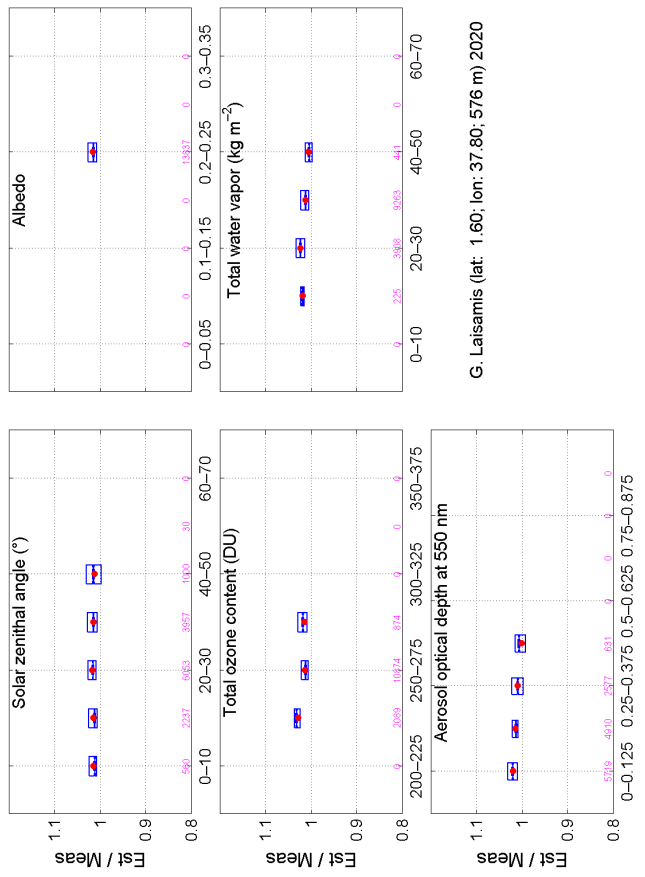

Figure S29: Comparison on global irradiance at Laisamis

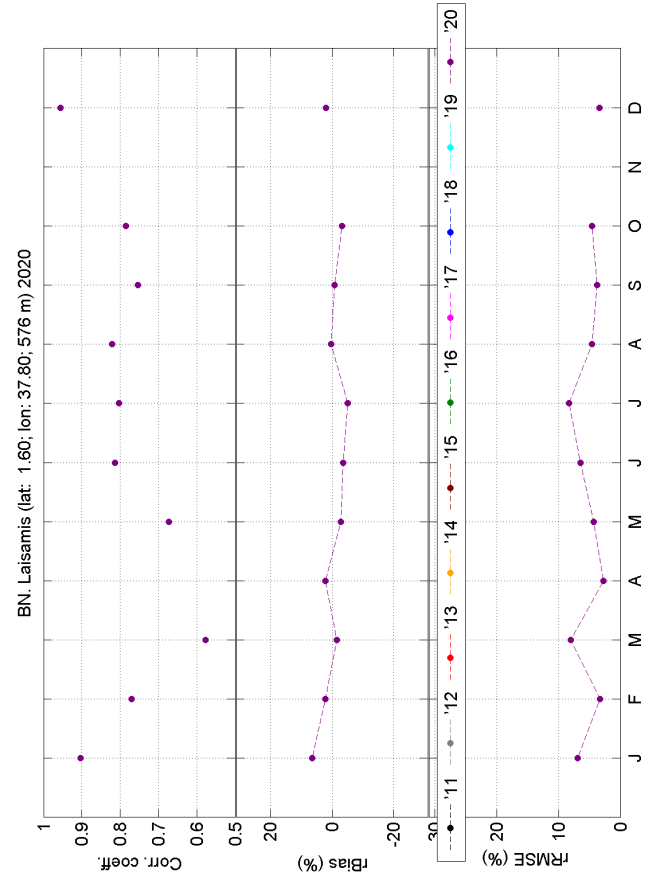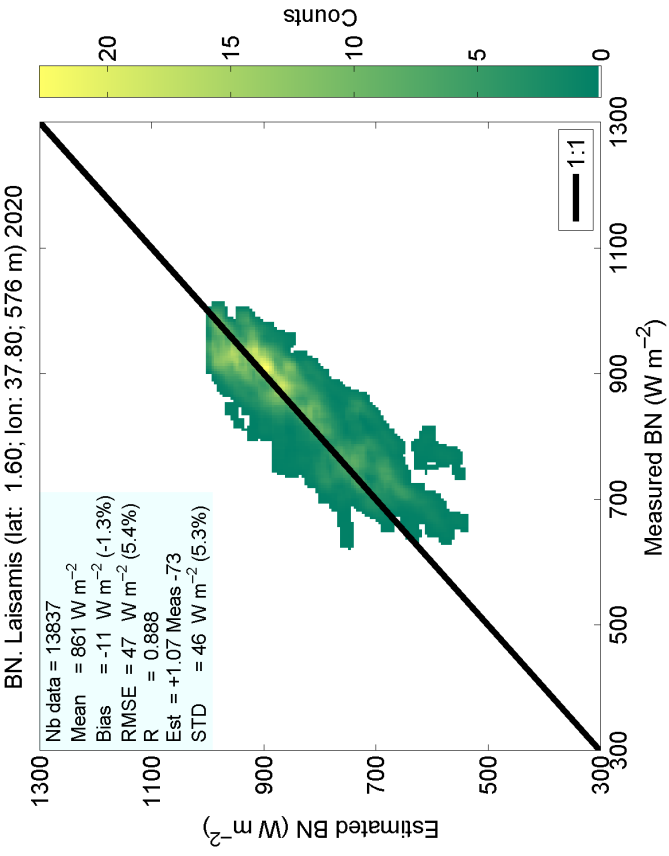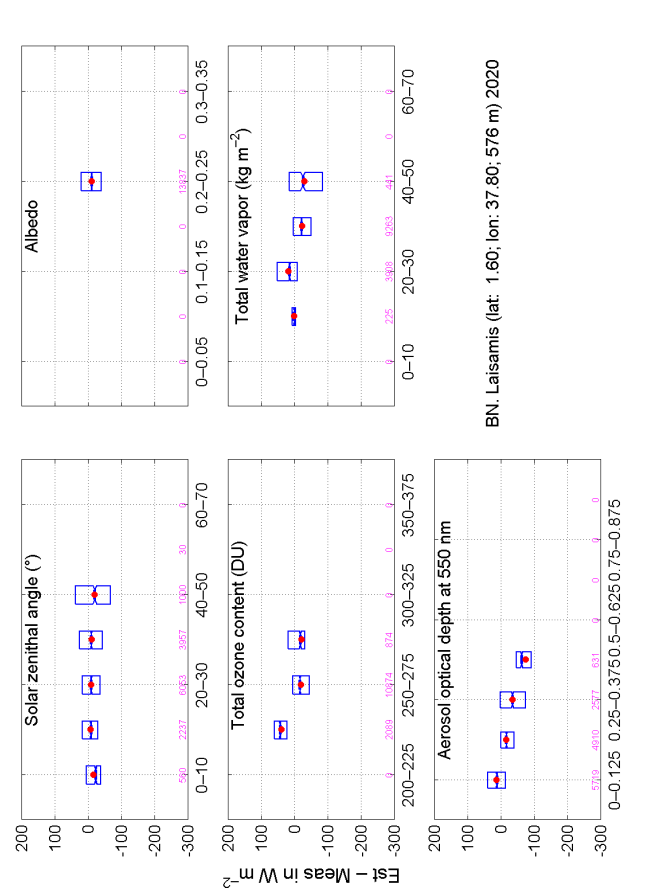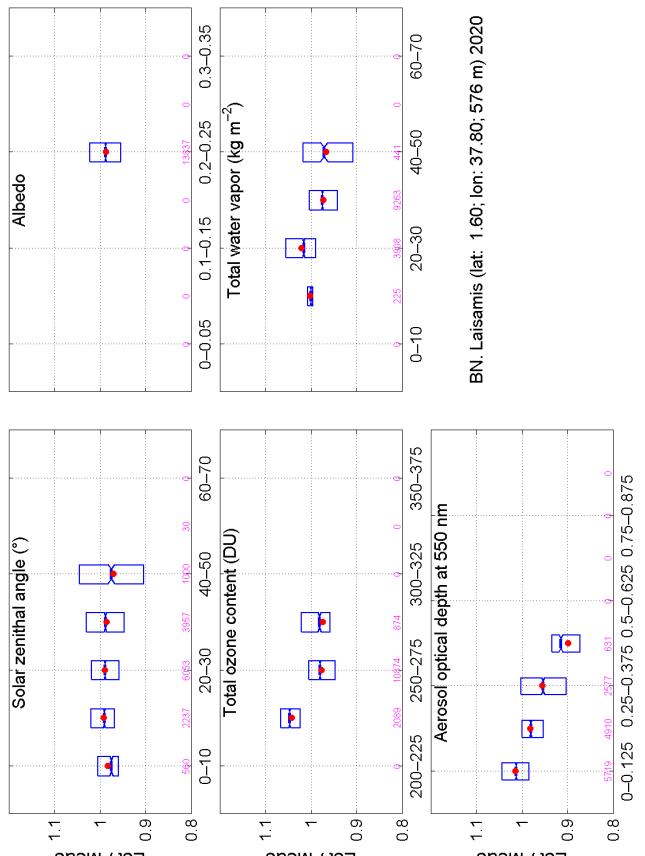

Figure S30: Comparison on direct component at normal irradiance at Laisamis



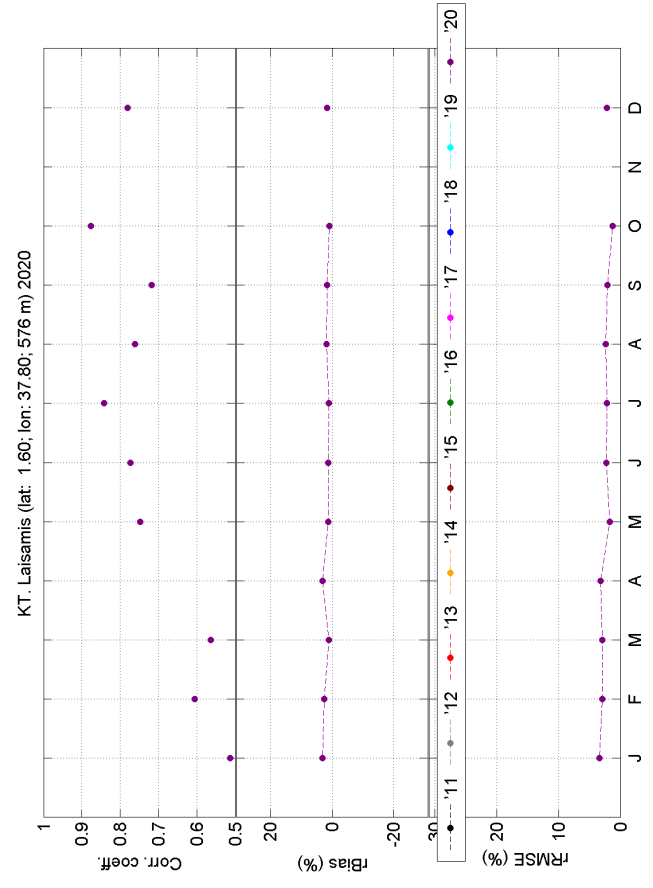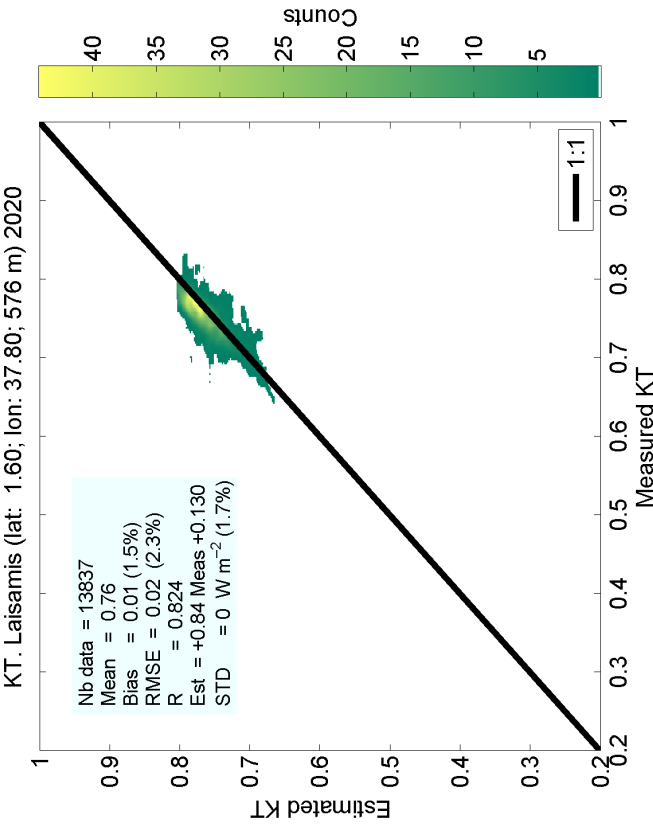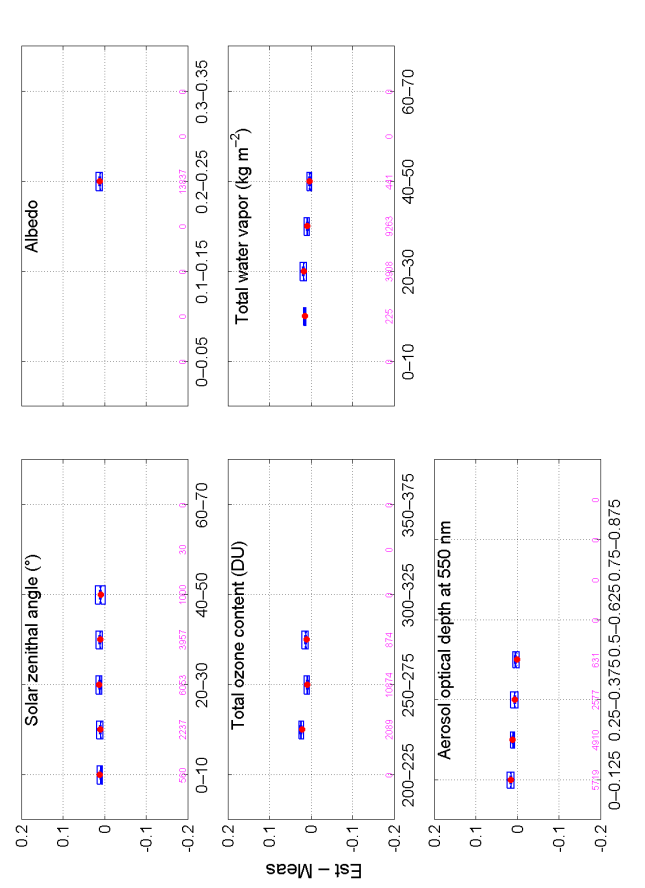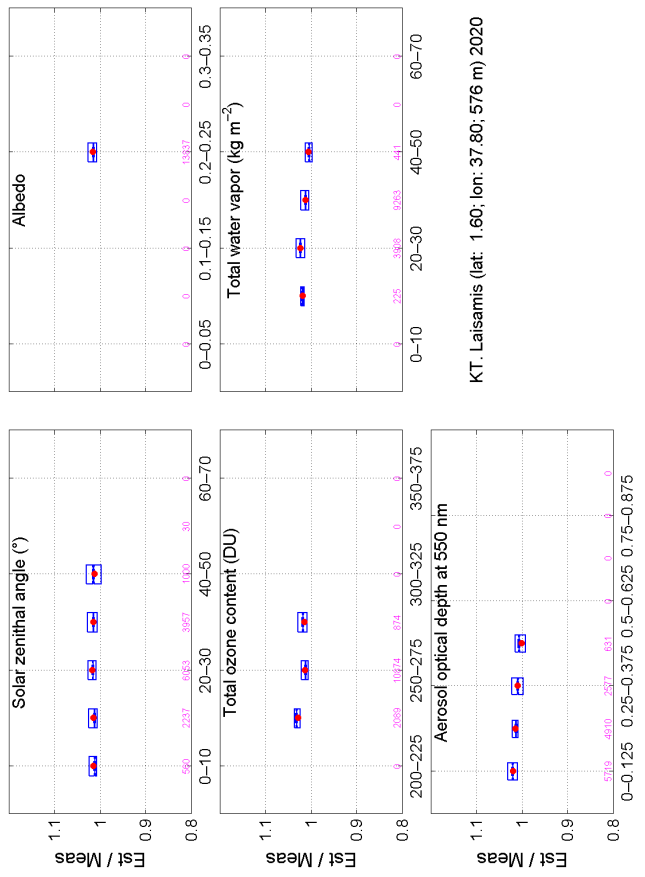

Figure S31: Comparison on clearness index at Laisamis

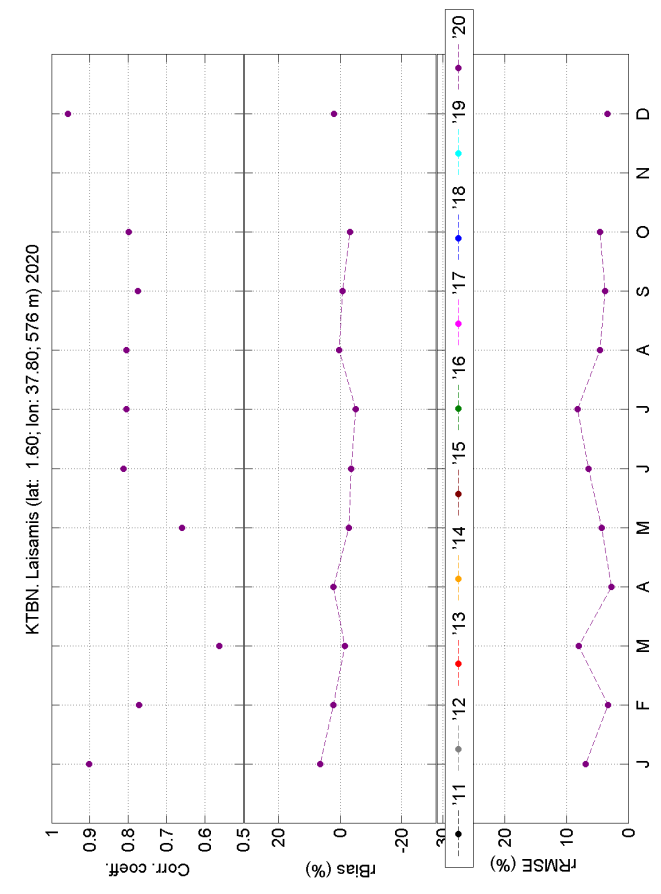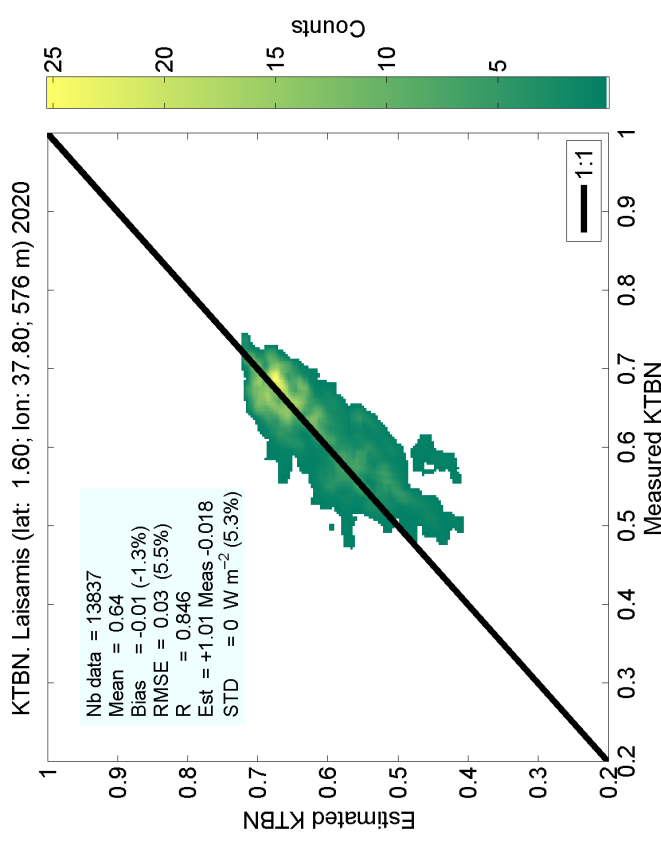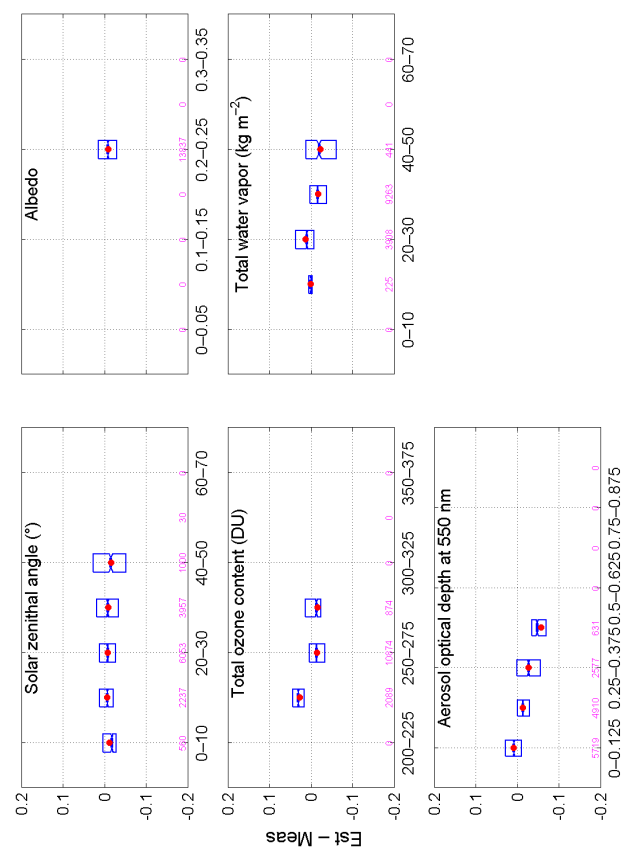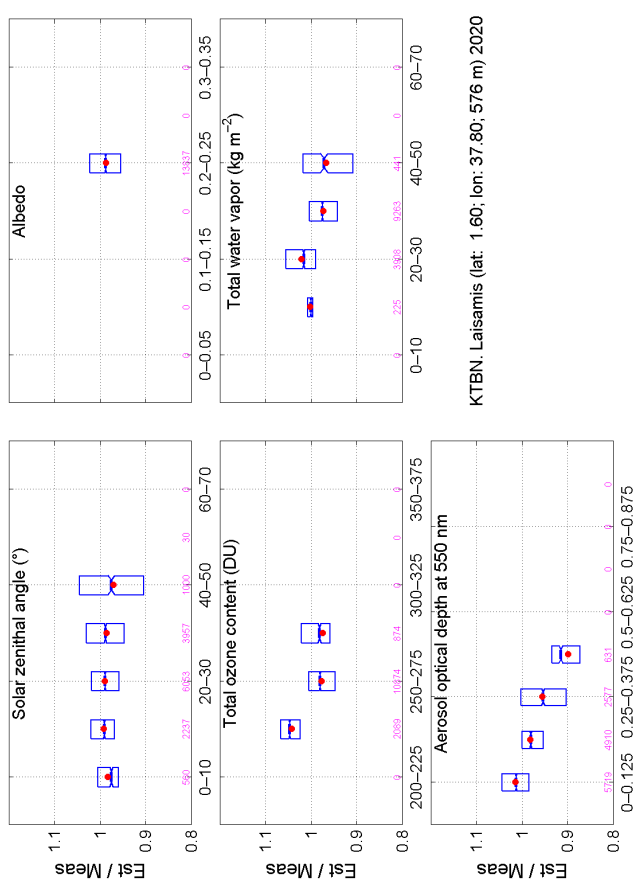

KTBN, Laisamis (lat: 1.60; lon: 37.80; 576 m) 2020

Figure S32: Comparison on direct clearness index at Laisamis

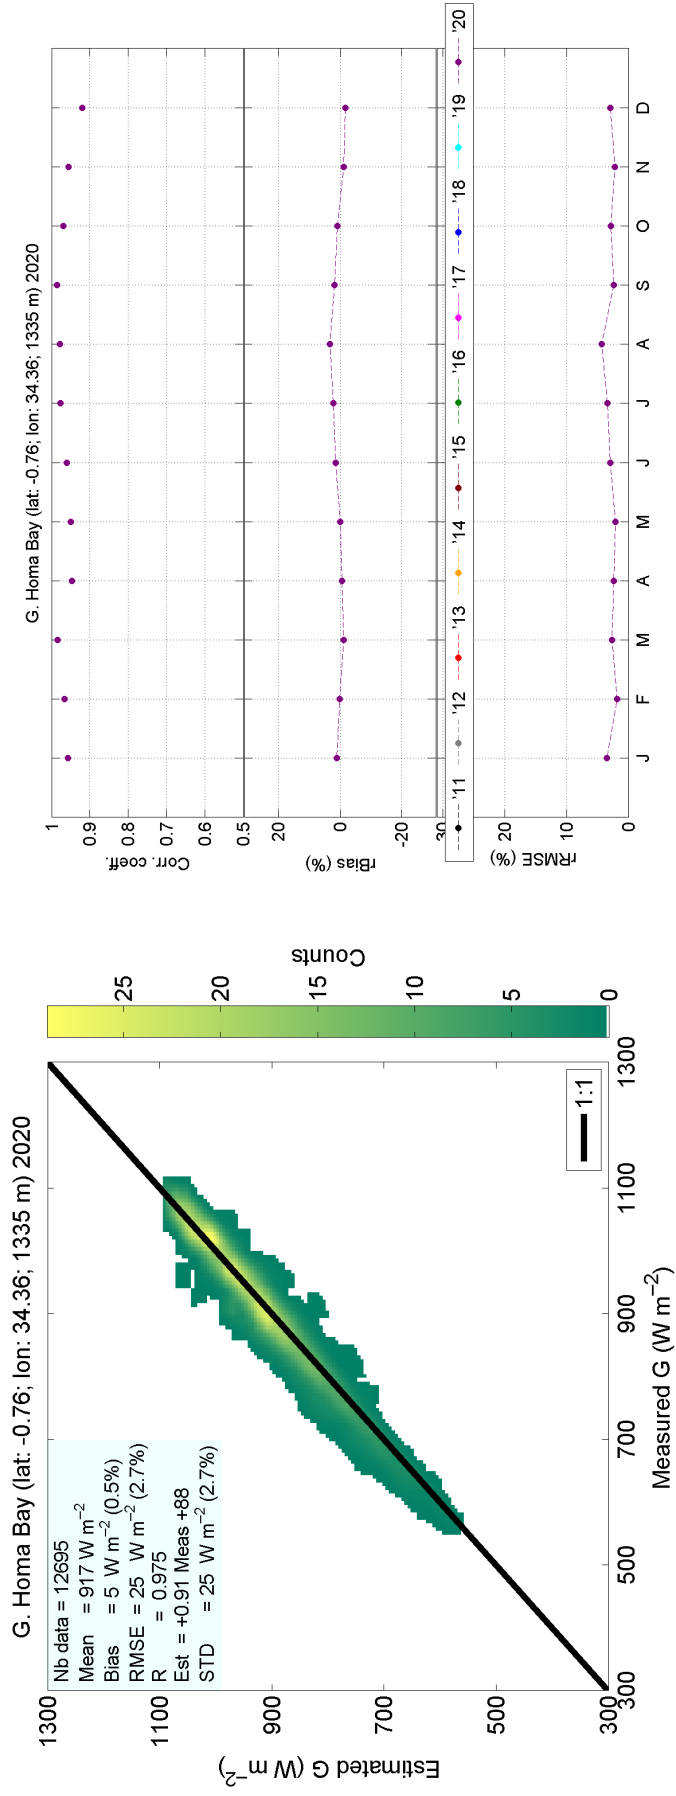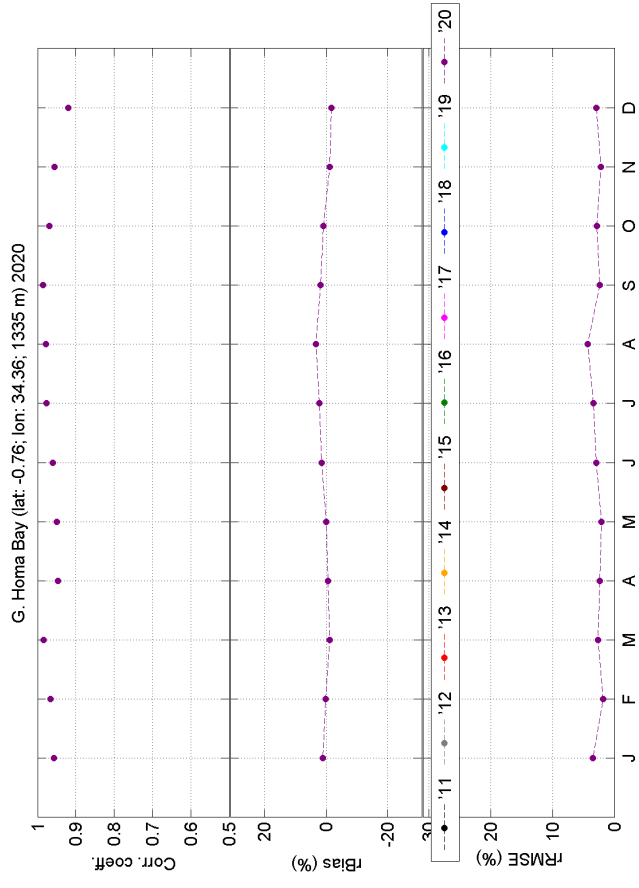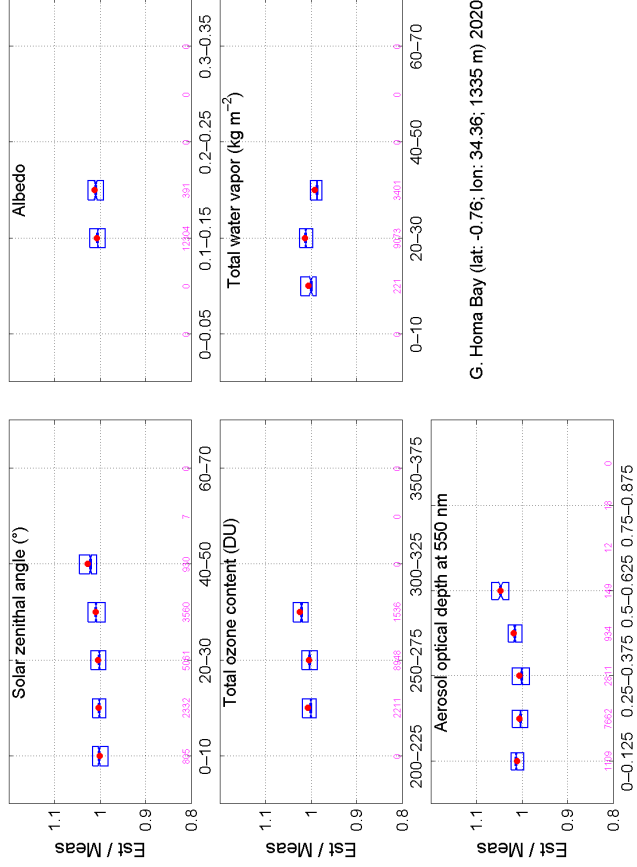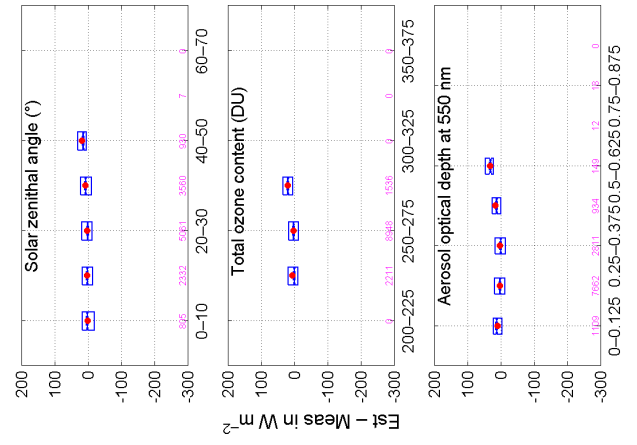

G. Homa Bay (lat: -0.76; lon: 34.36; 1335 m) 2020

G. Homa Bay (lat: -0.76; lon: 34.36; 1335 m) 2020

Figure S33: Comparison on global irradiance at Homa Bay

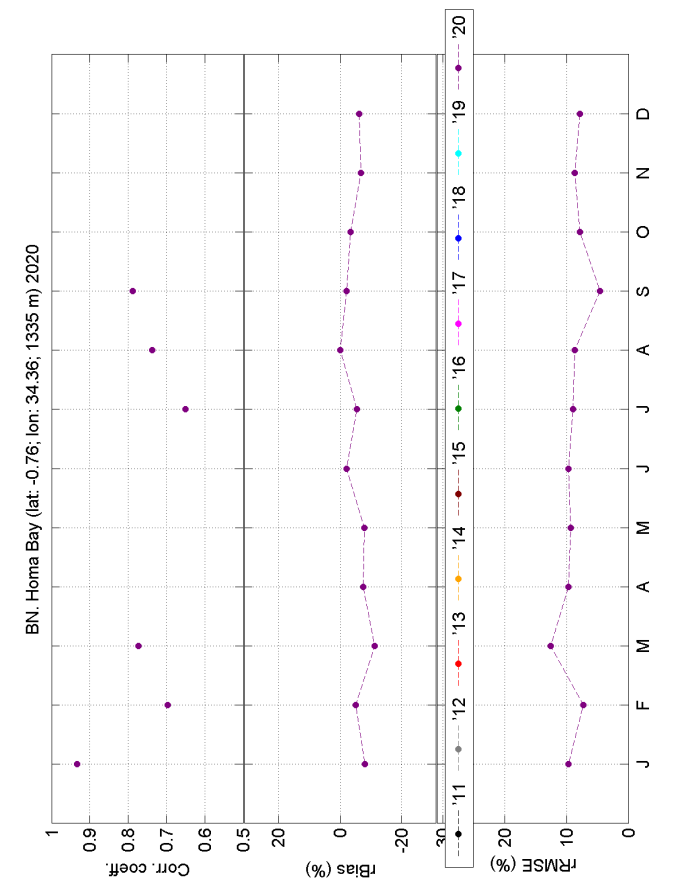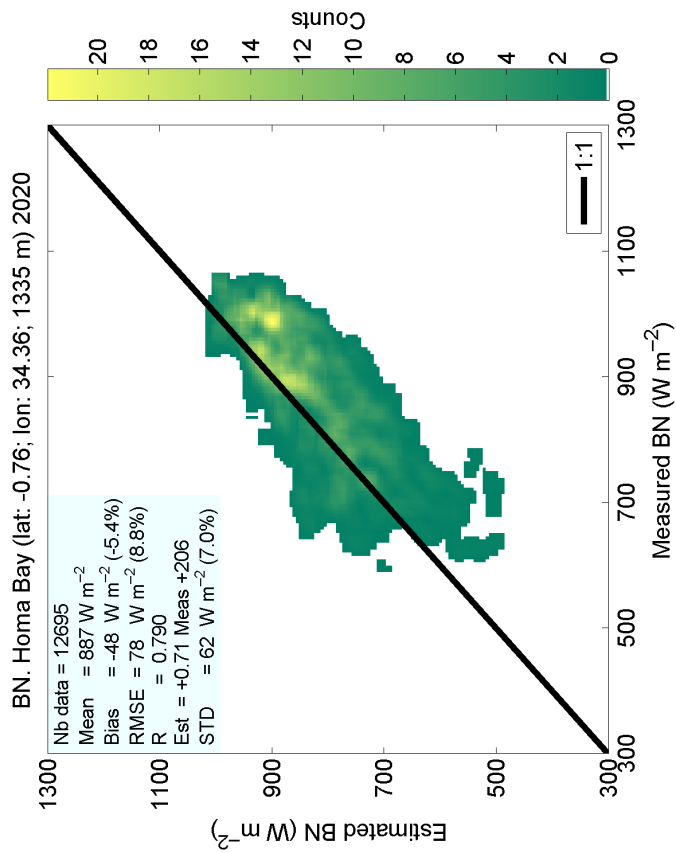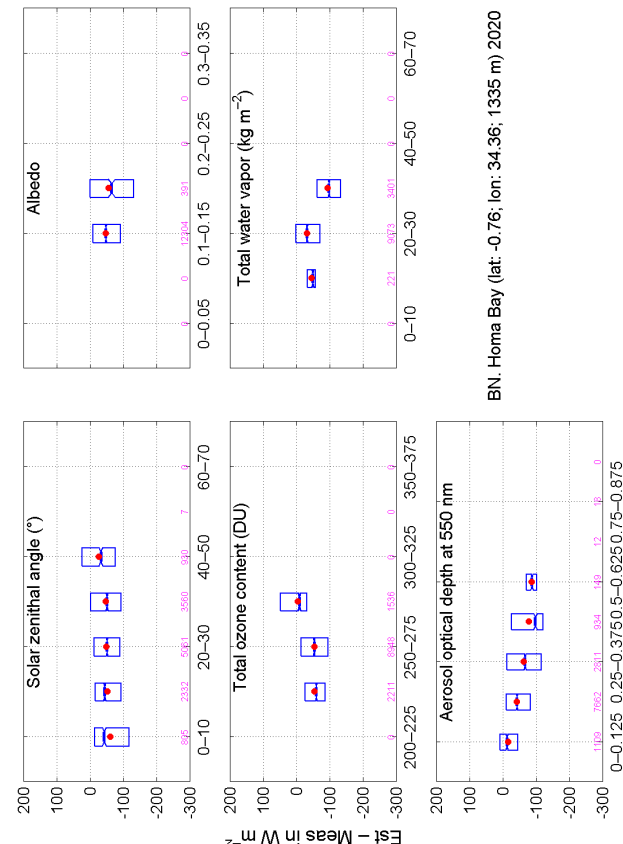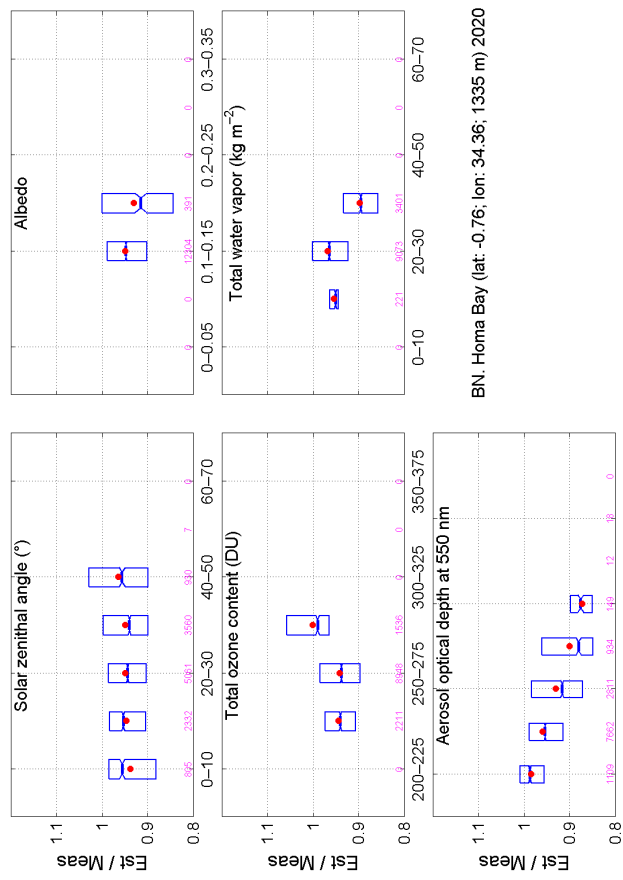

Figure S34: Comparison on direct component at normal irradiance at Homa Bay

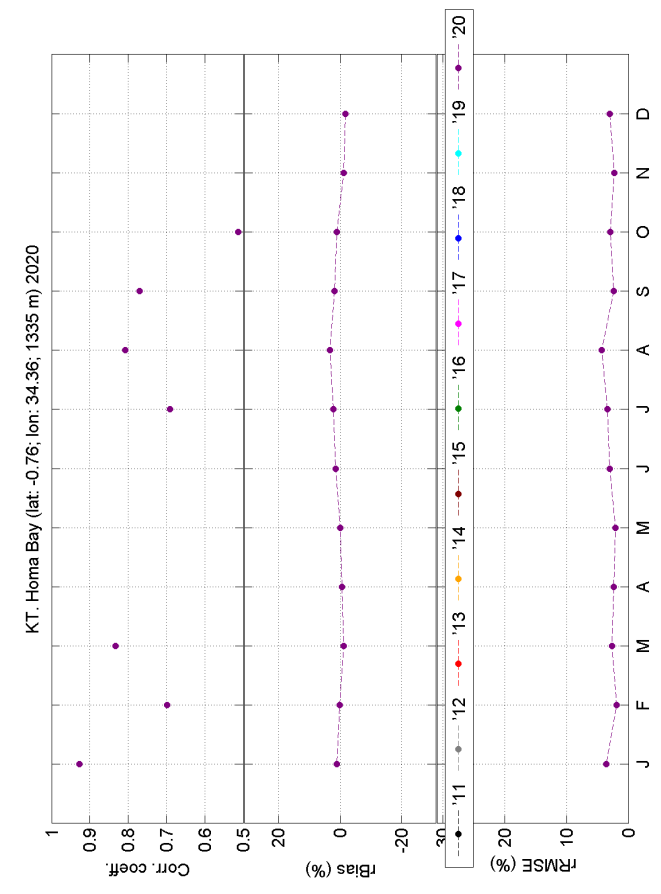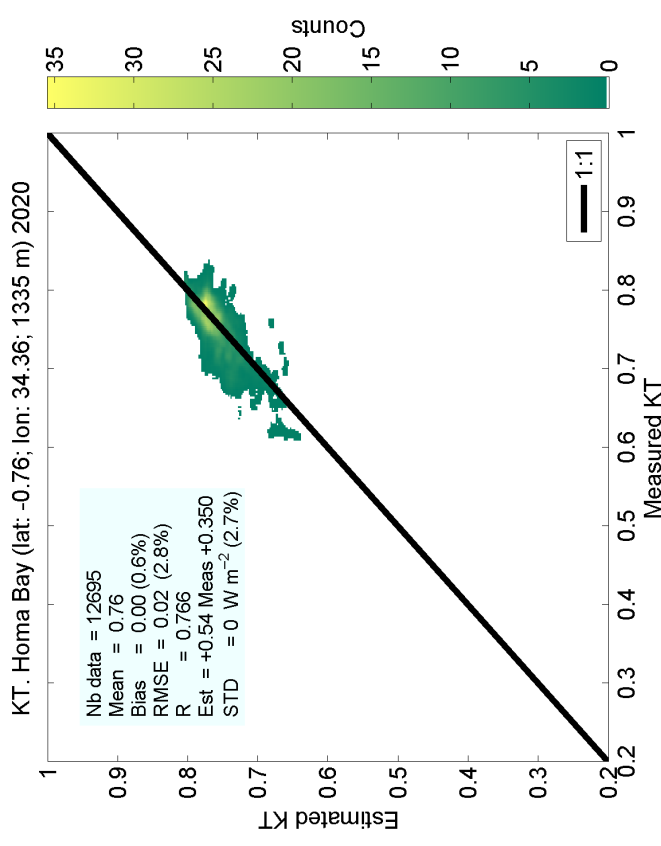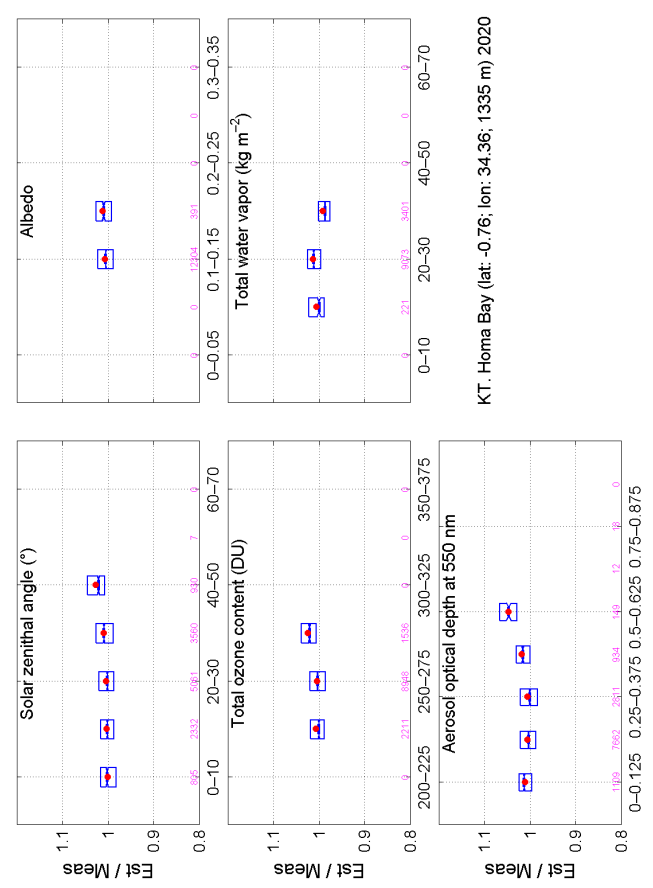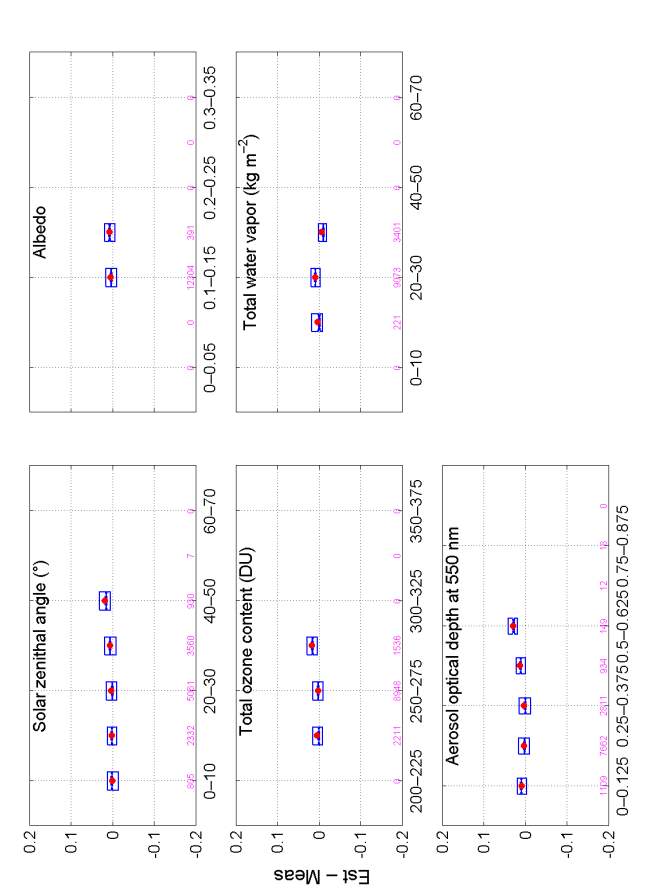

Figure S35: Comparison on clearness index at Homa Bay

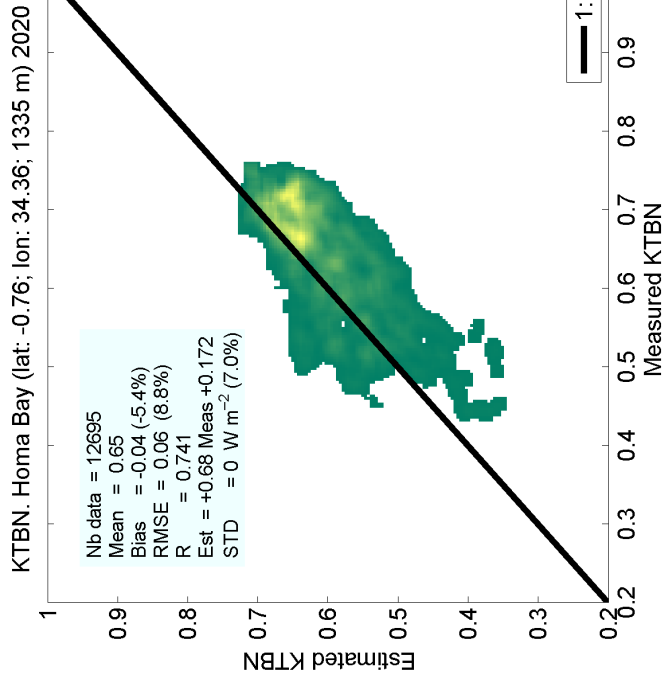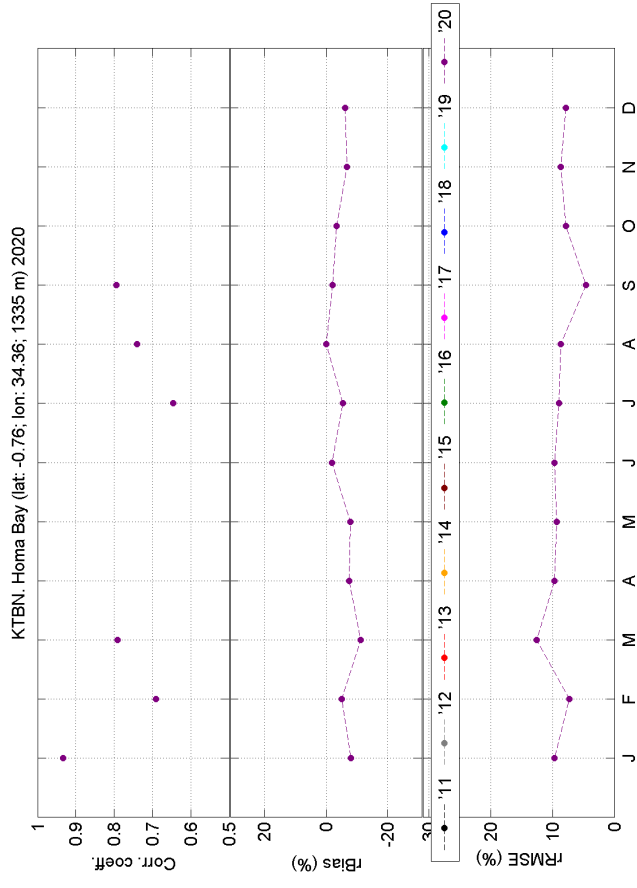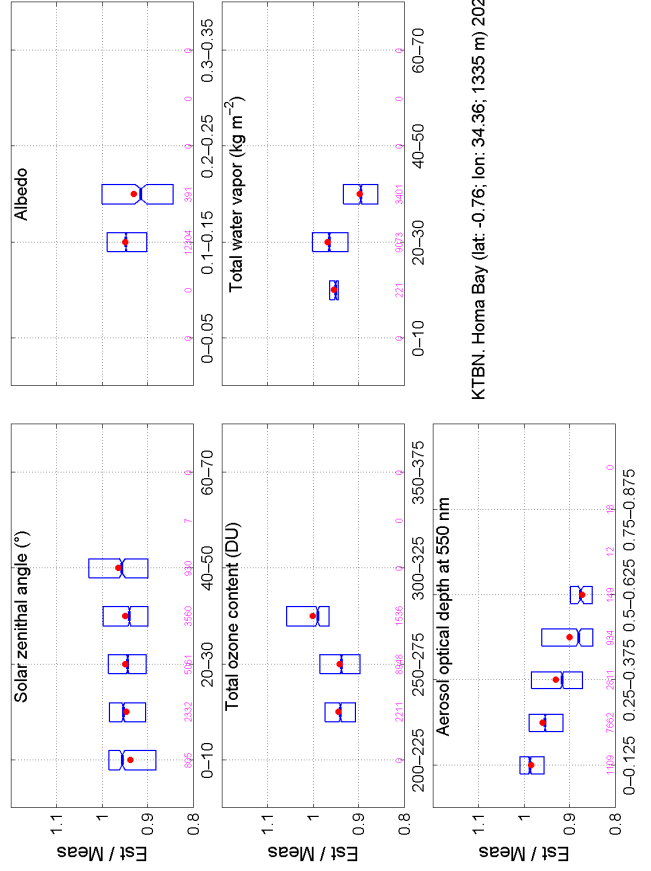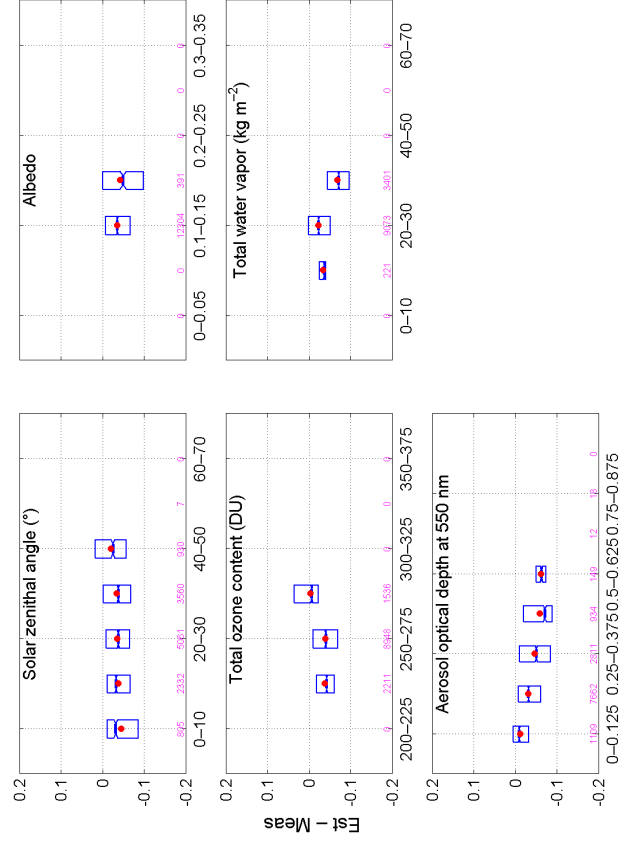

Figure S36: Comparison on direct clearness index at Homa Bay

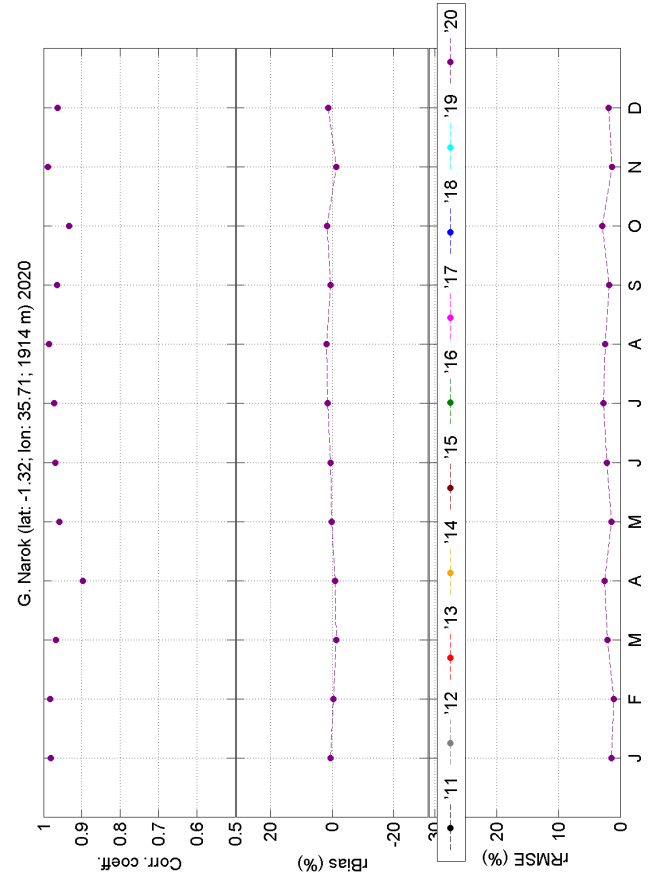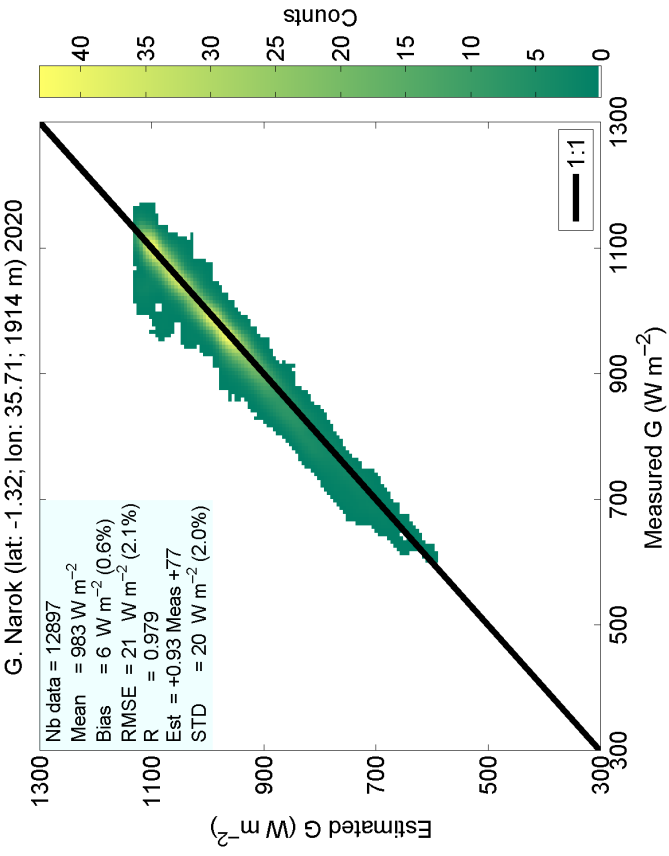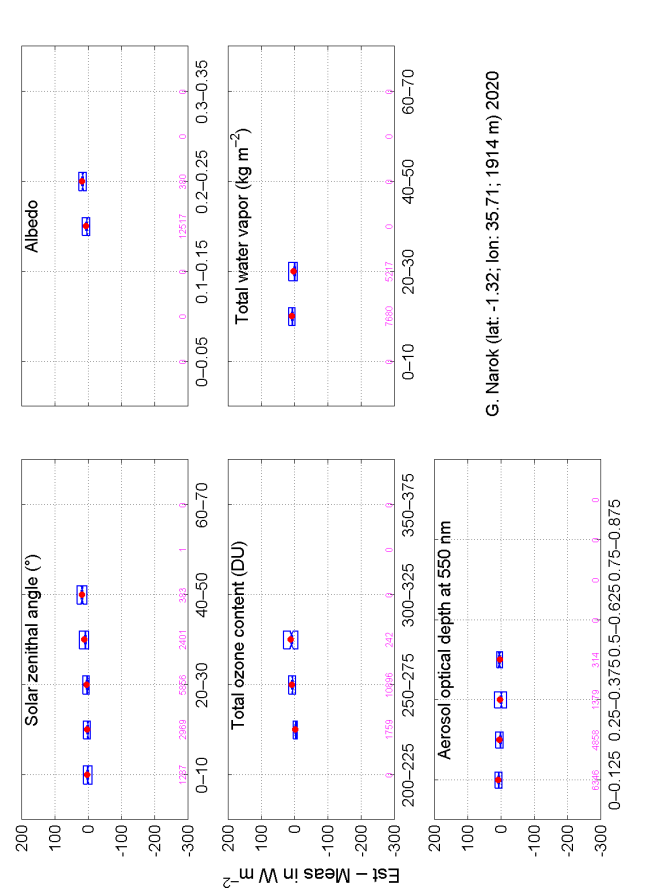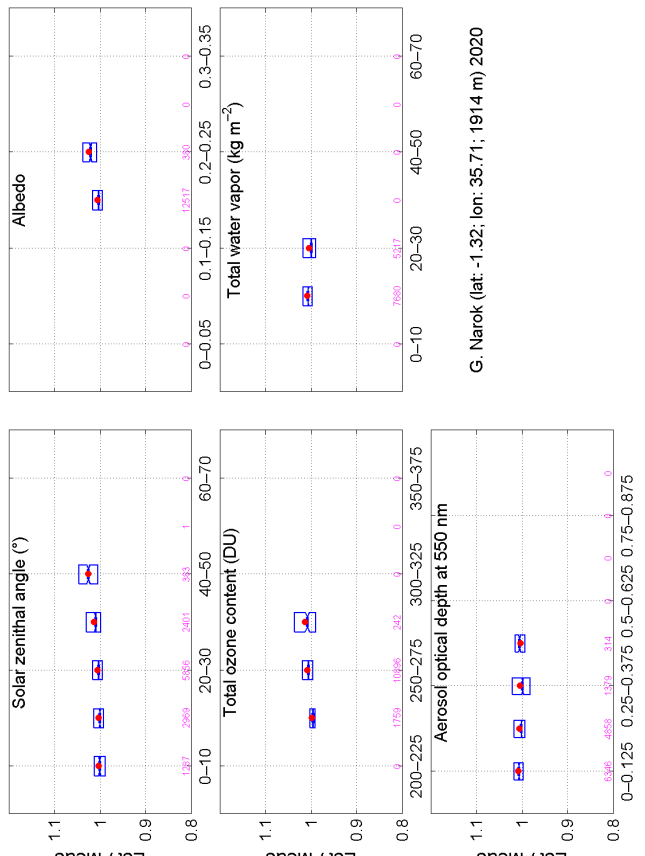

Figure S37: Comparison on global irradiance at Narok

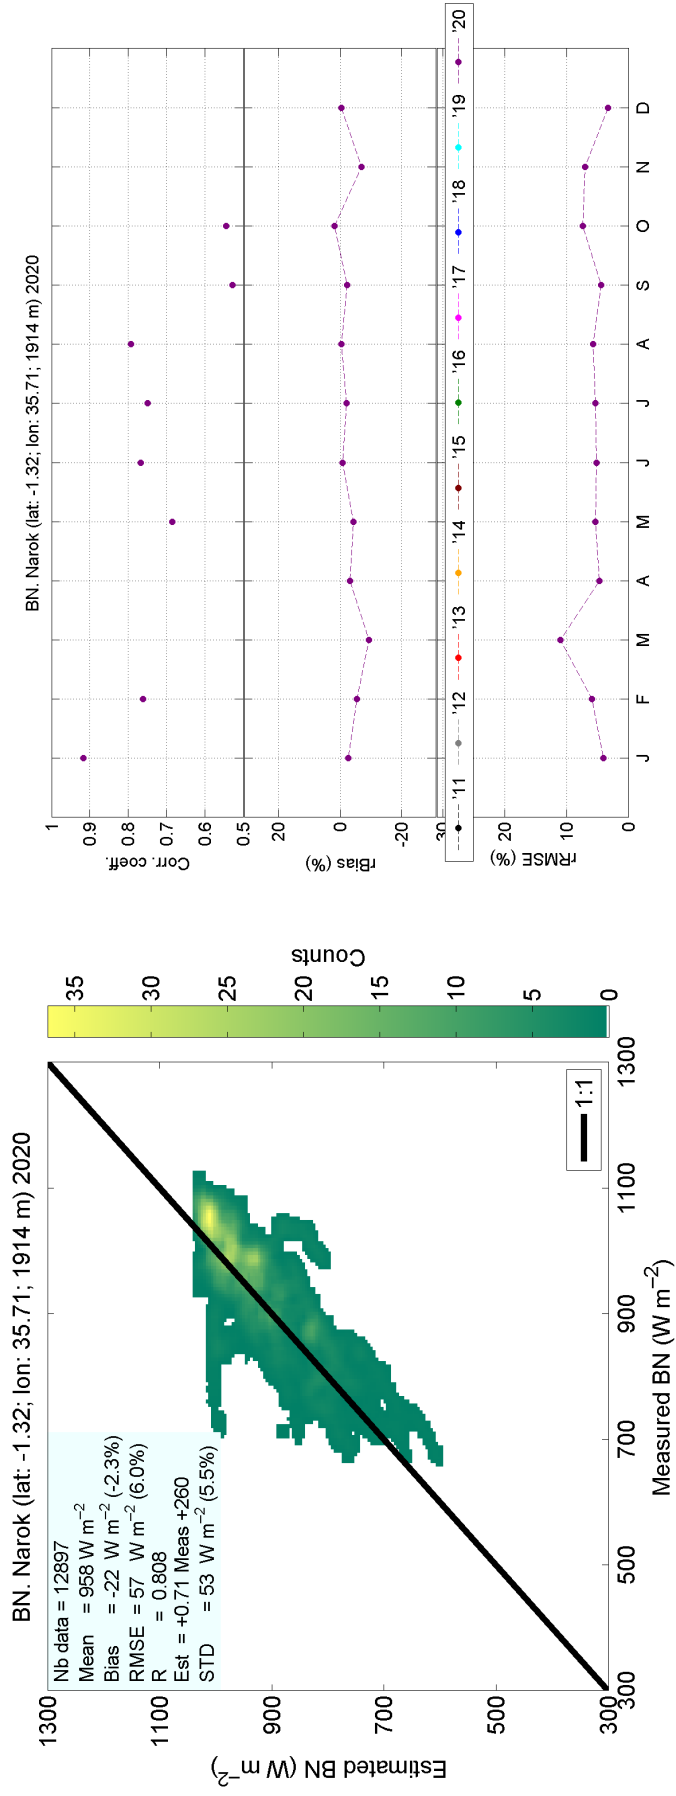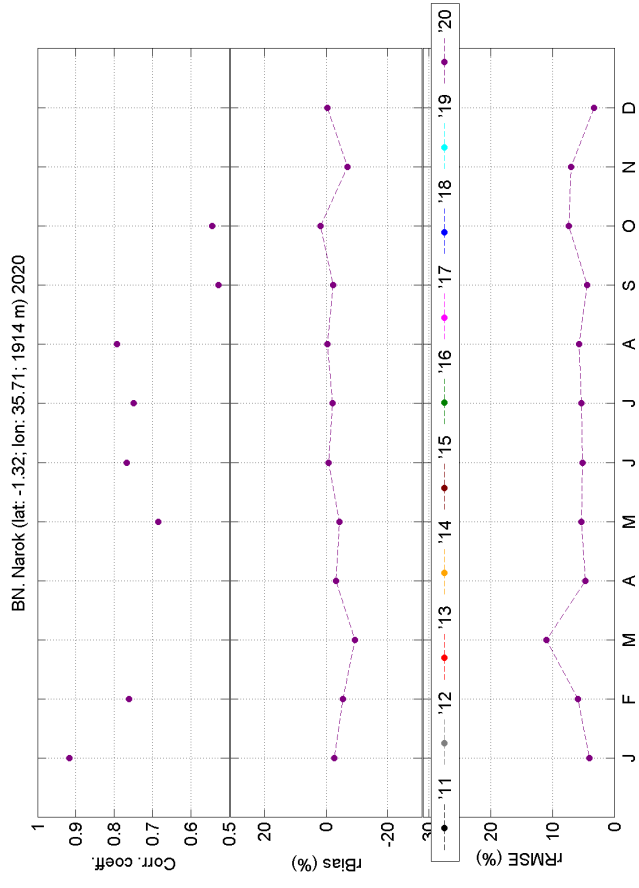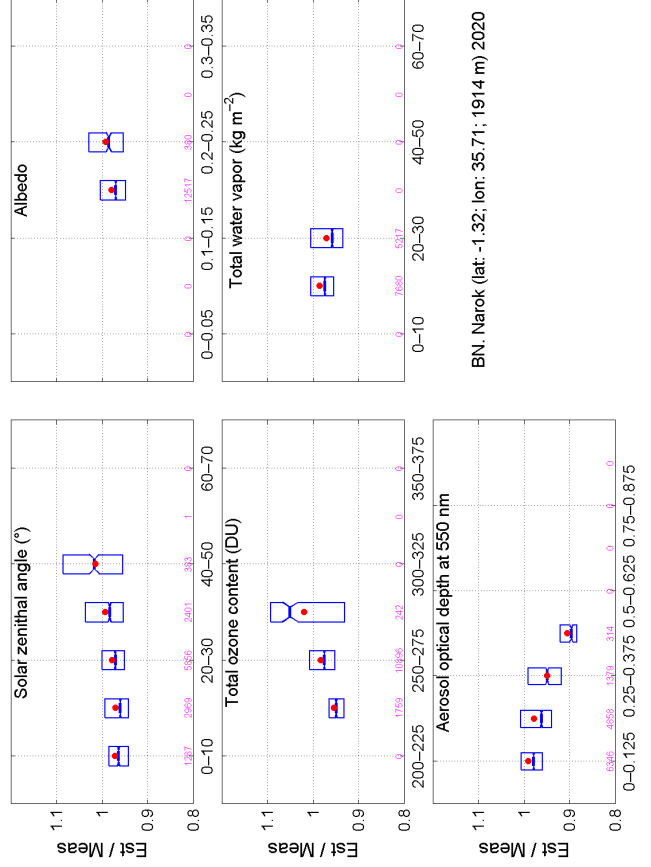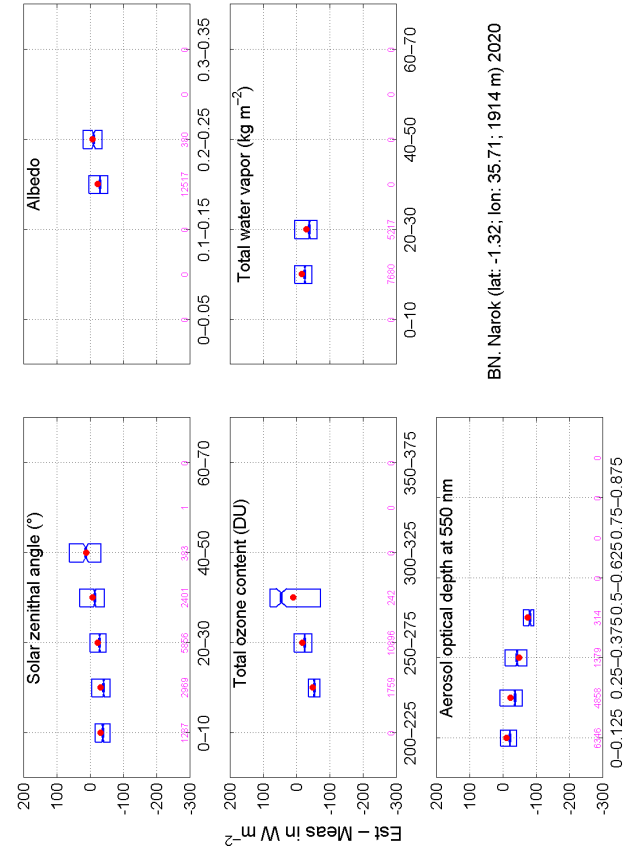

Figure S38: Comparison on direct component at normal irradiance at Narok



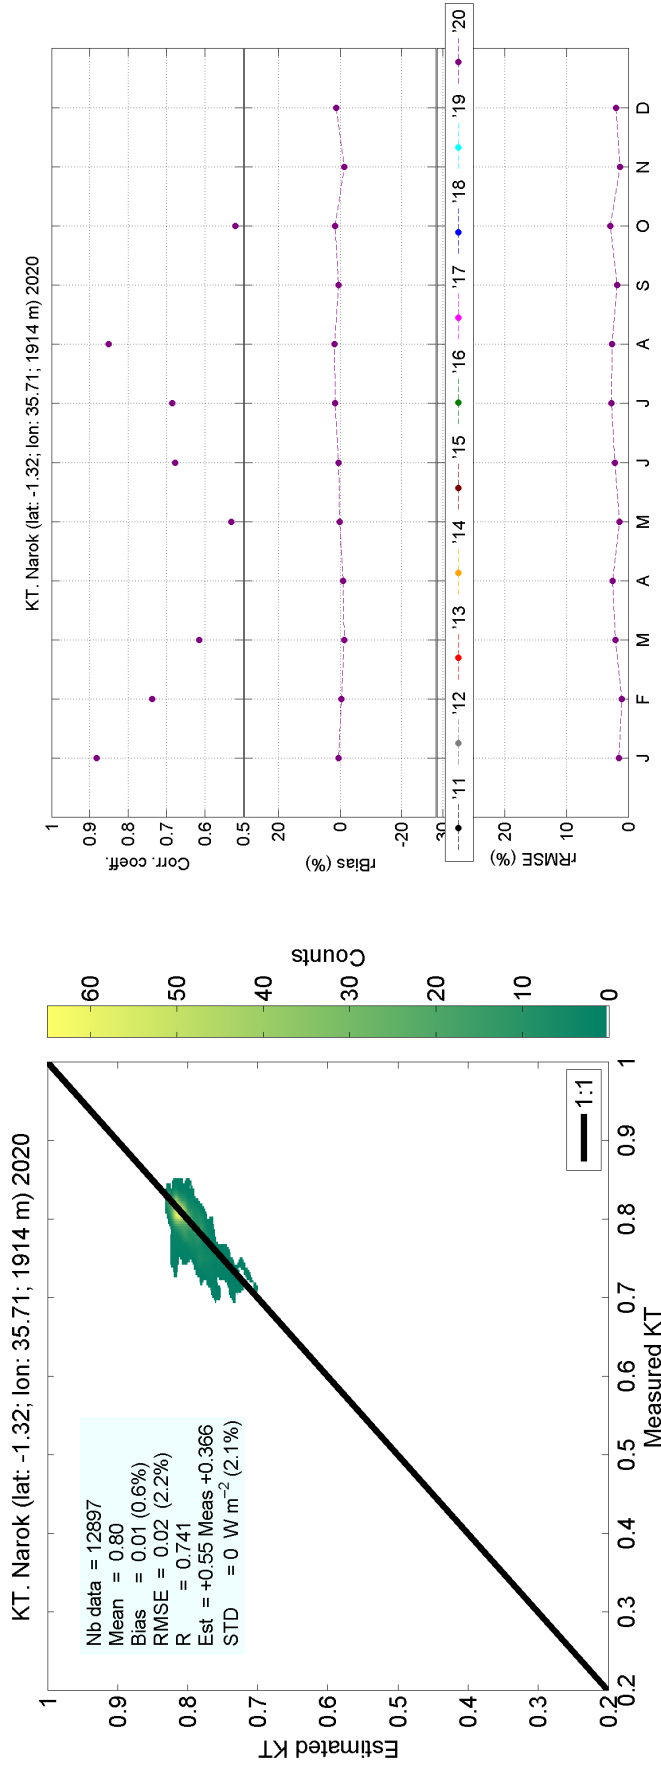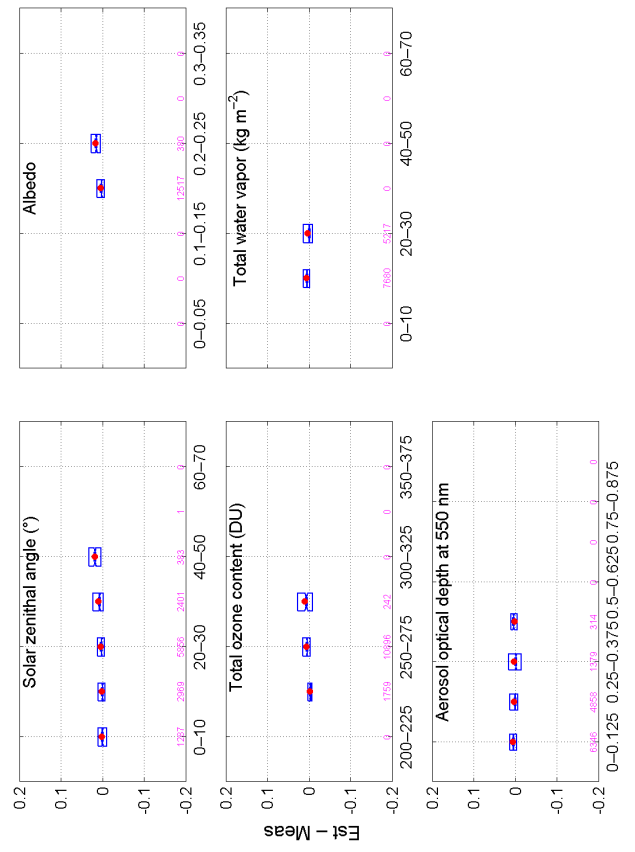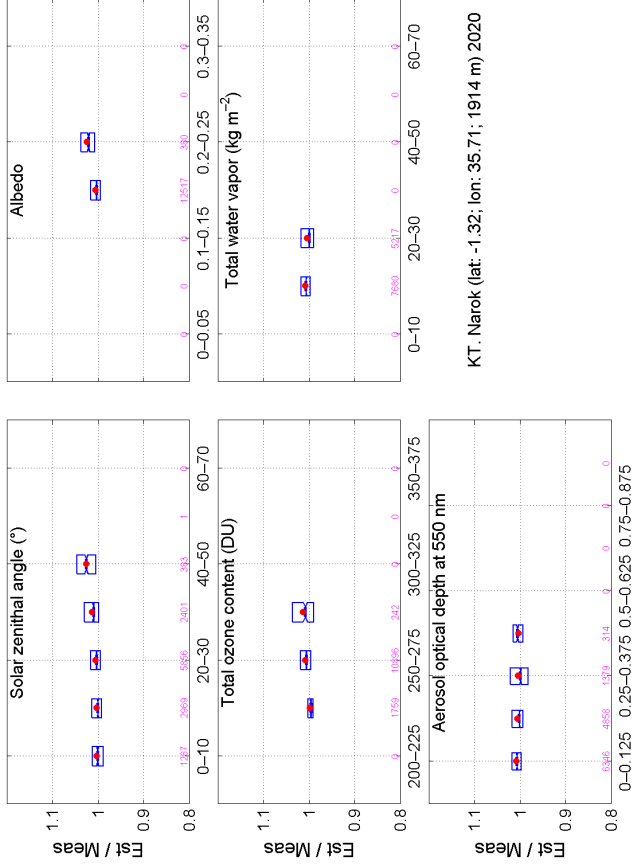

Figure S39: Comparison on clearness index at Narok

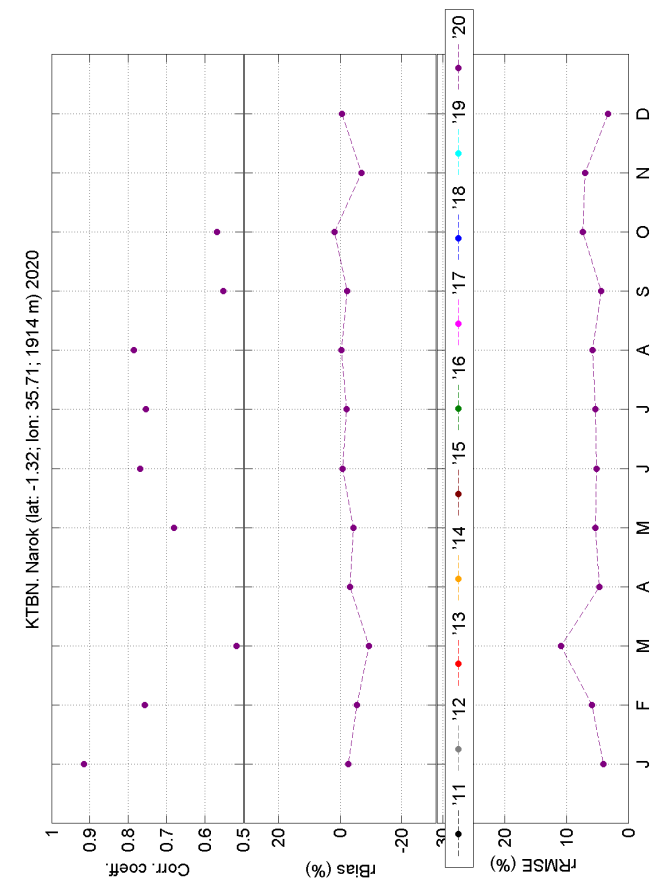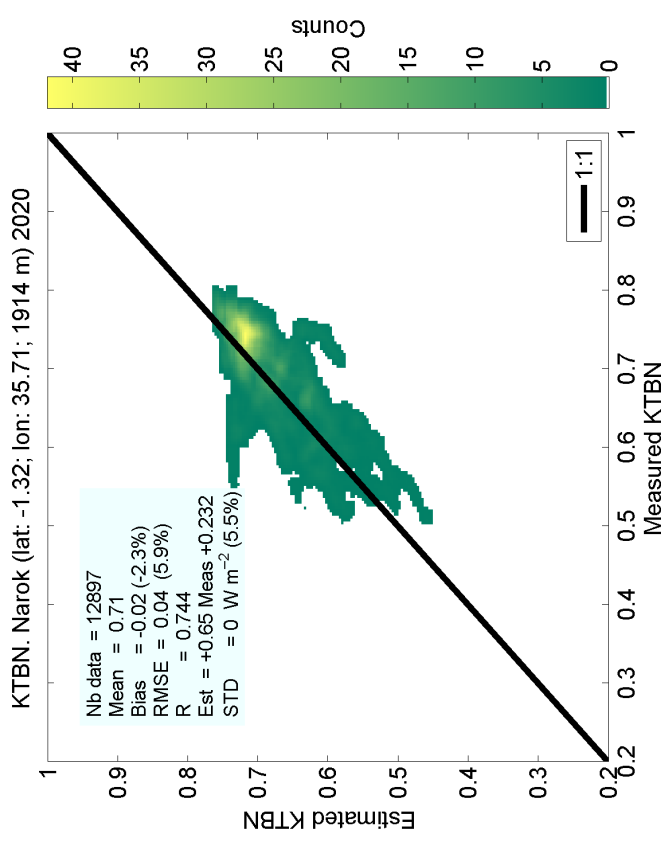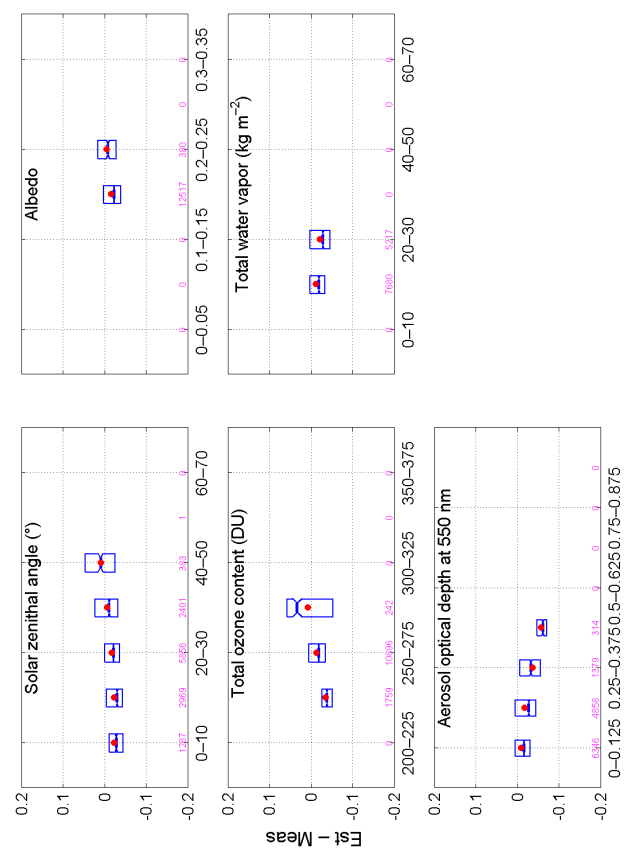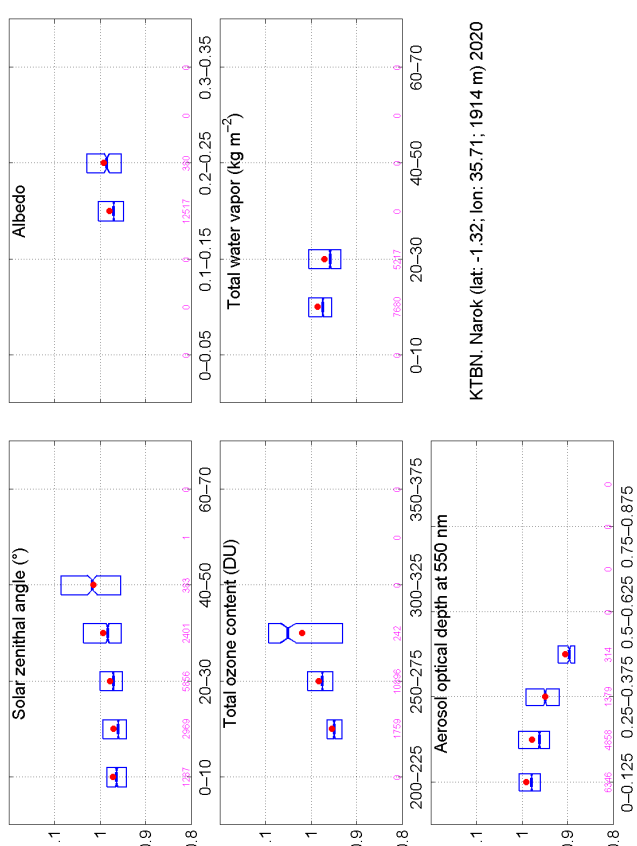

Figure S40: Comparison on direct clearness index at Narok

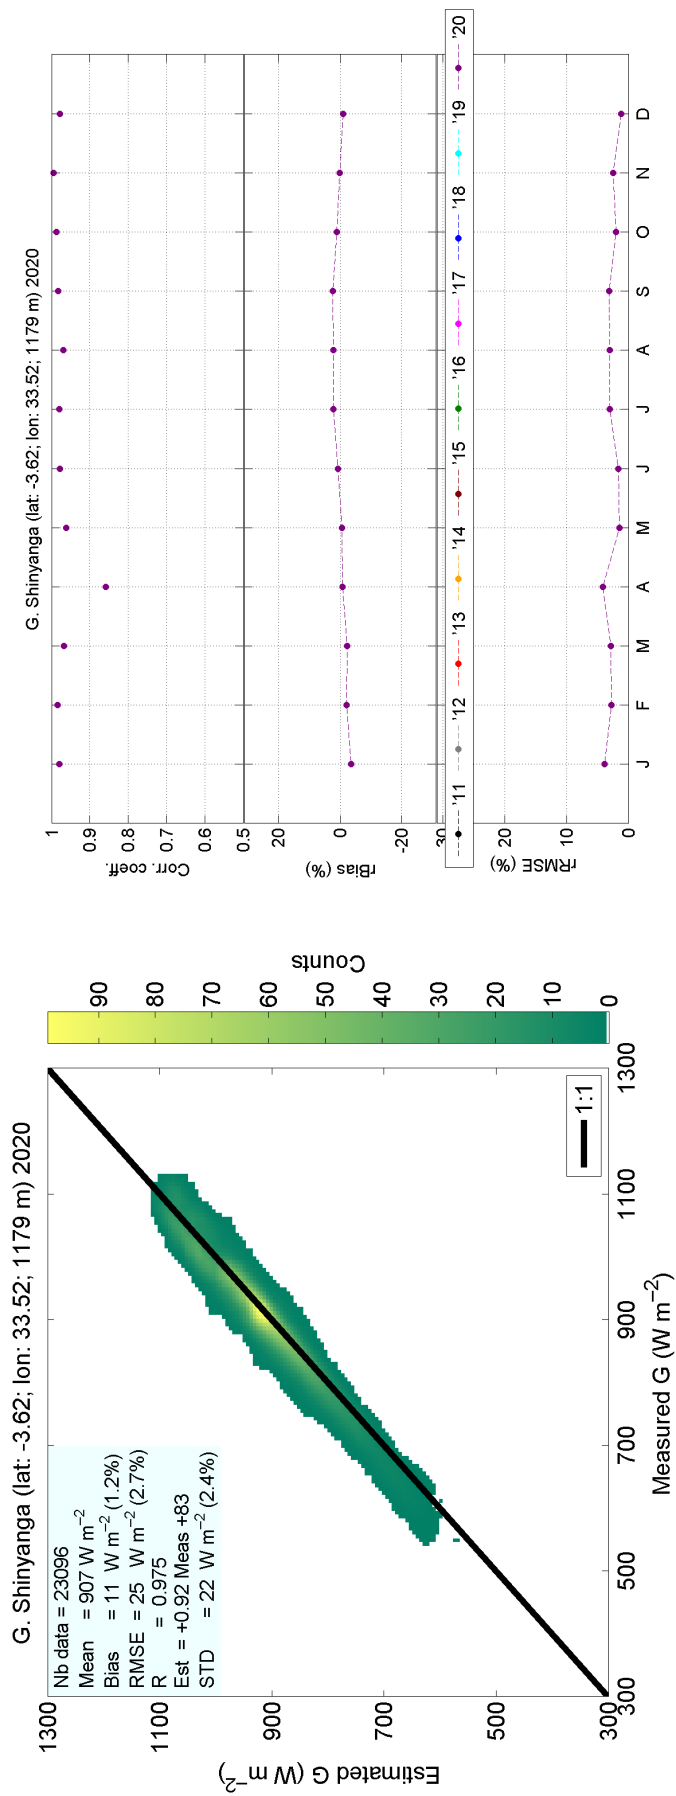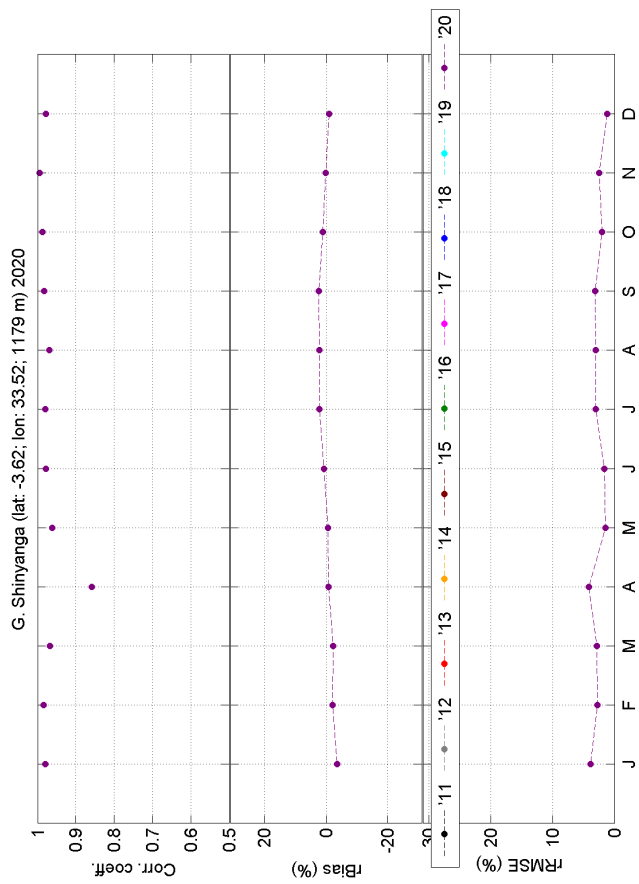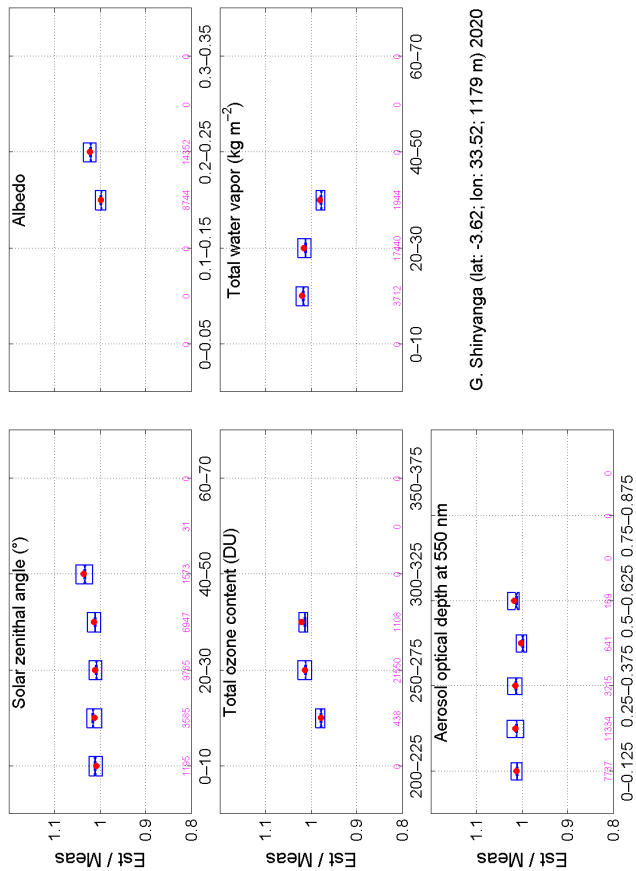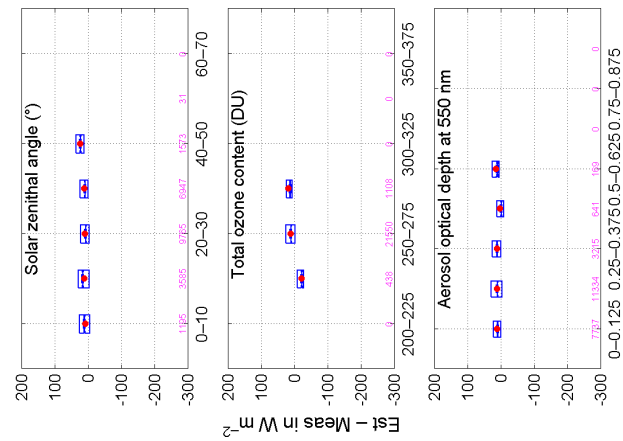

G. Shinyanga (lat: -3.62; lon: 33.52; 1179 m) 2020

G. Shinyanga (lat: -3.62; lon: 33.52; 1179 m) 2020

Figure S41: Comparison on global irradiance at Shinyanga

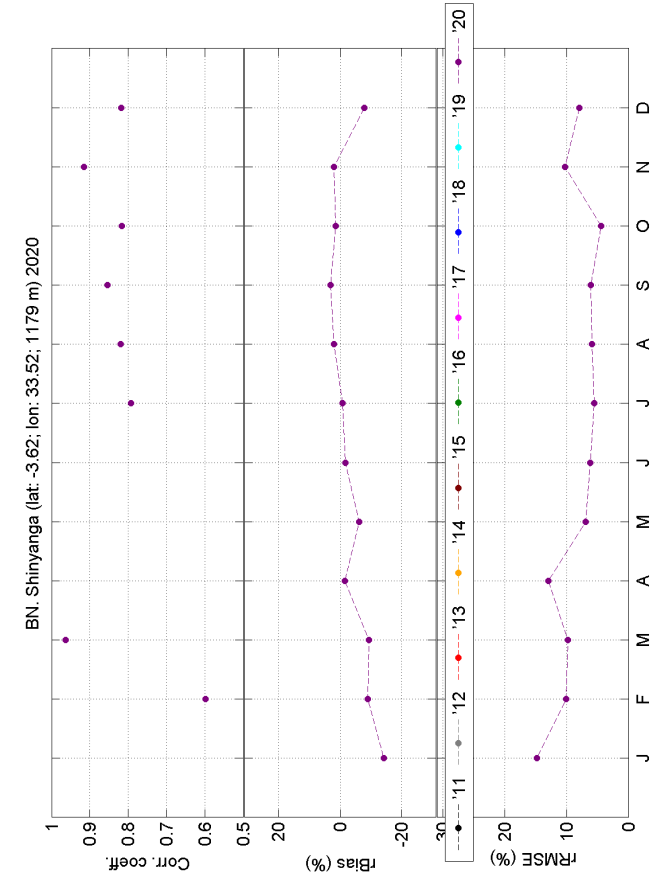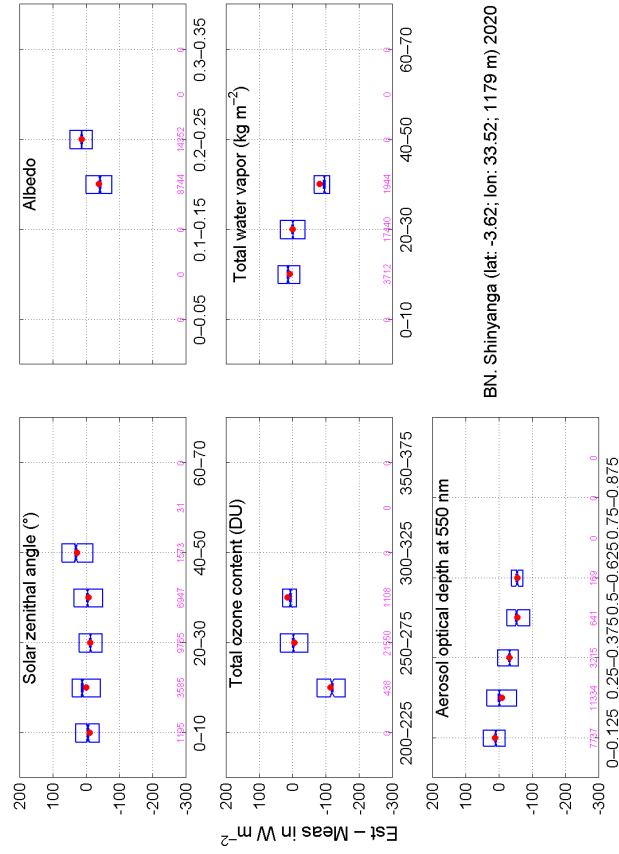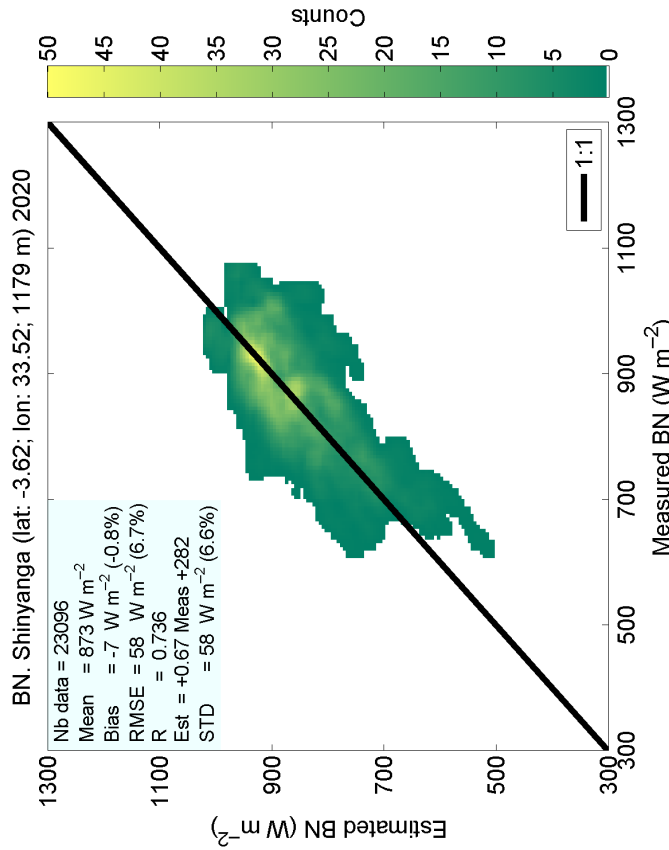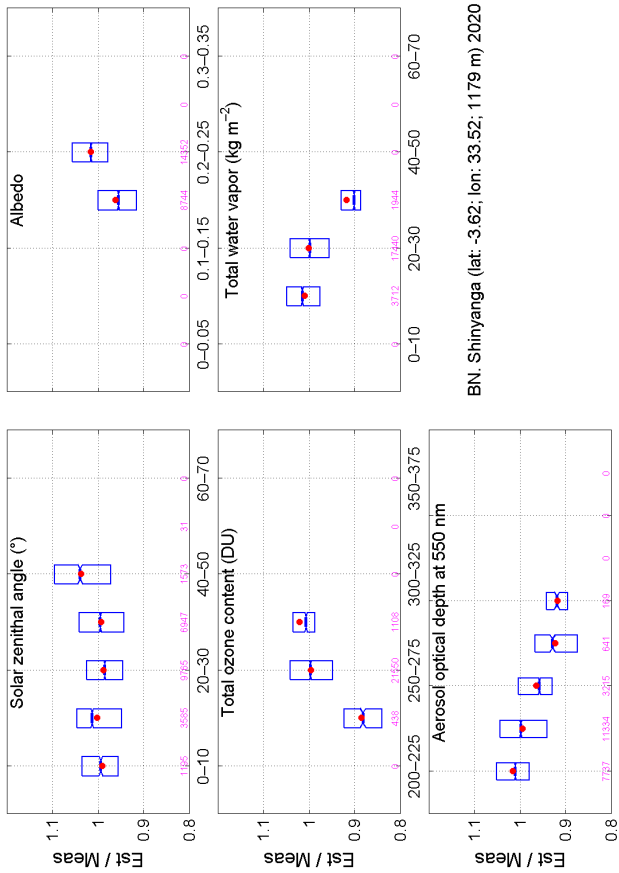

Figure S42: Comparison on direct component at normal irradiance at Shinyanga

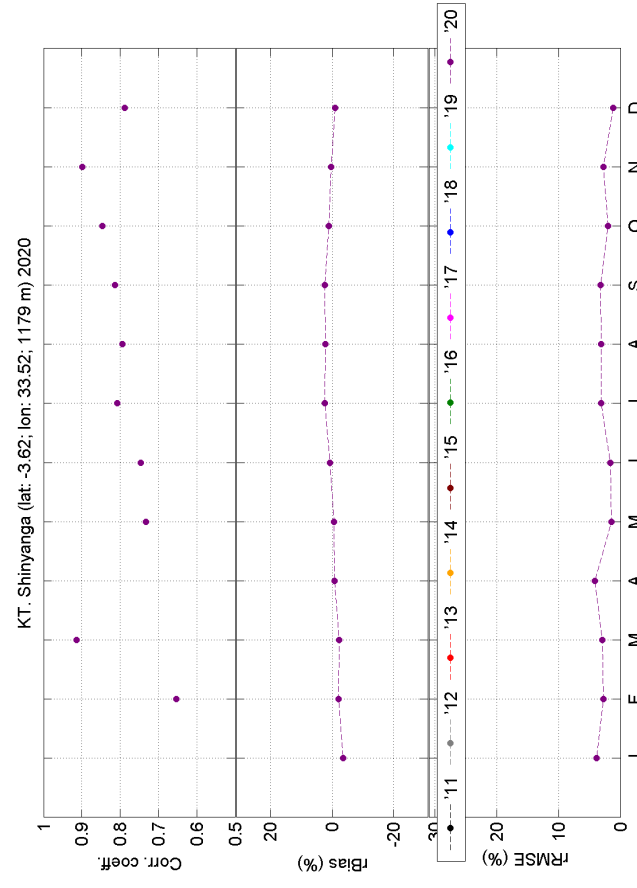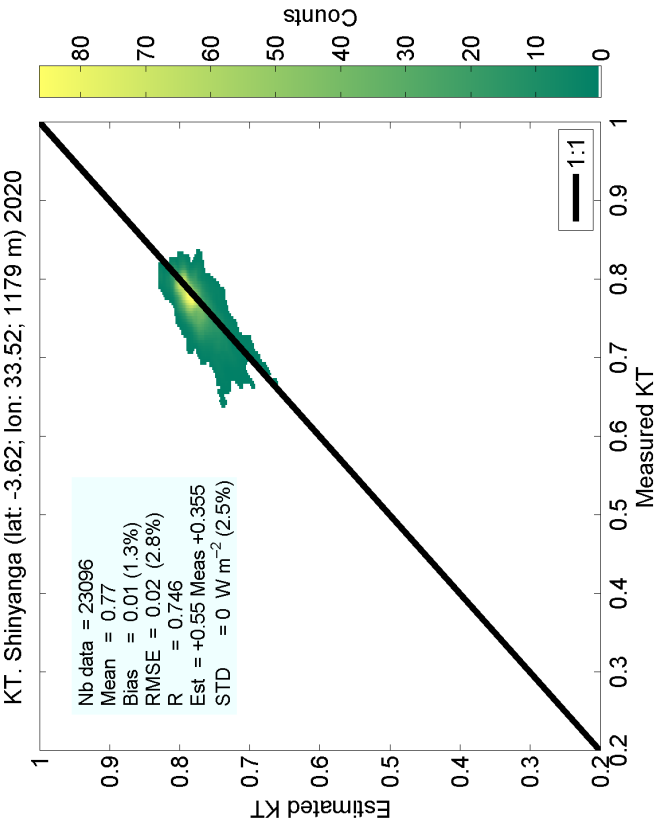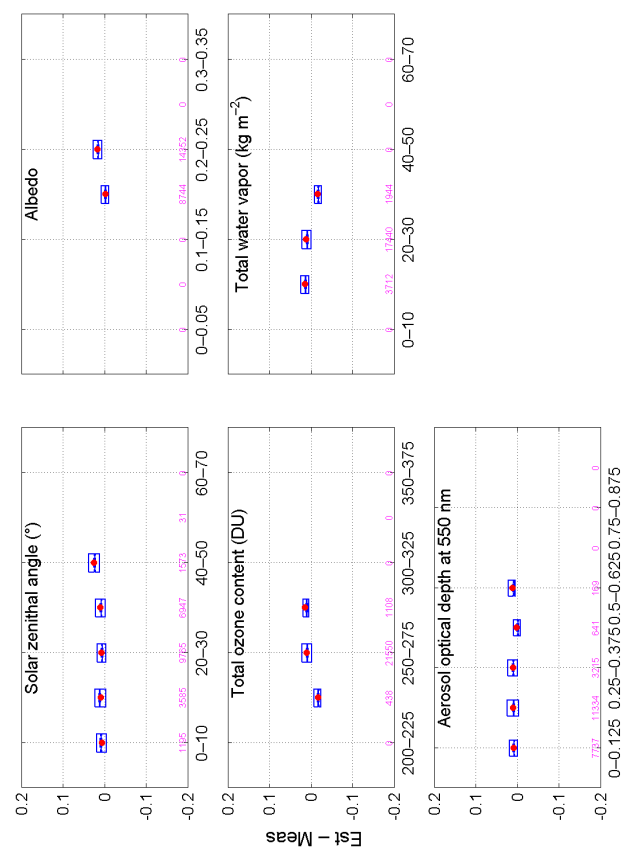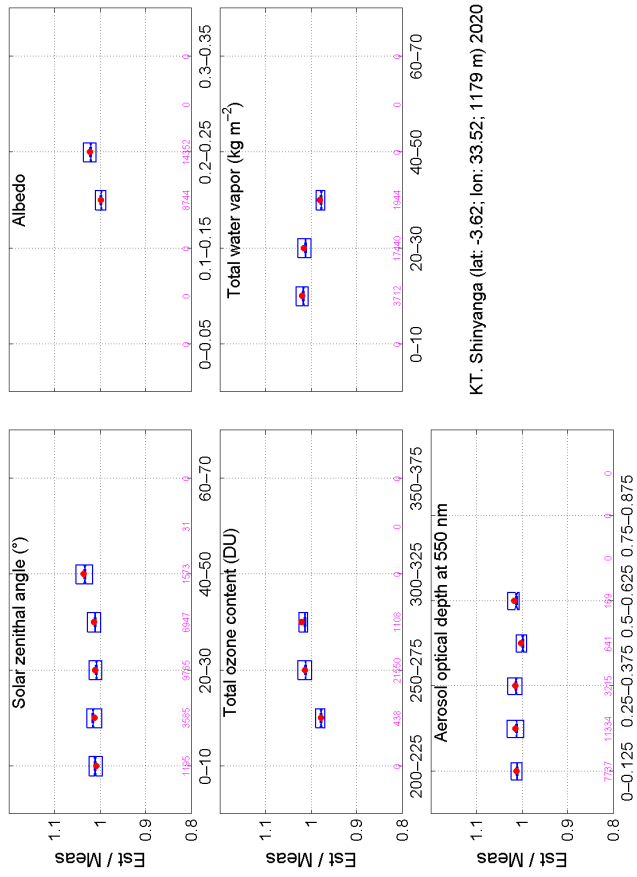

Figure S43: Comparison on clearness index at Shinyanga

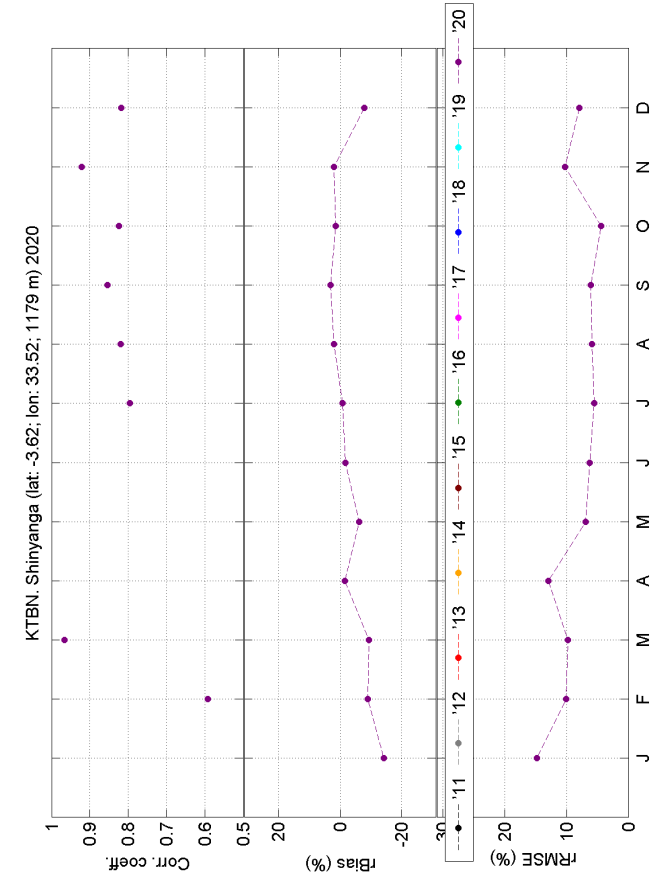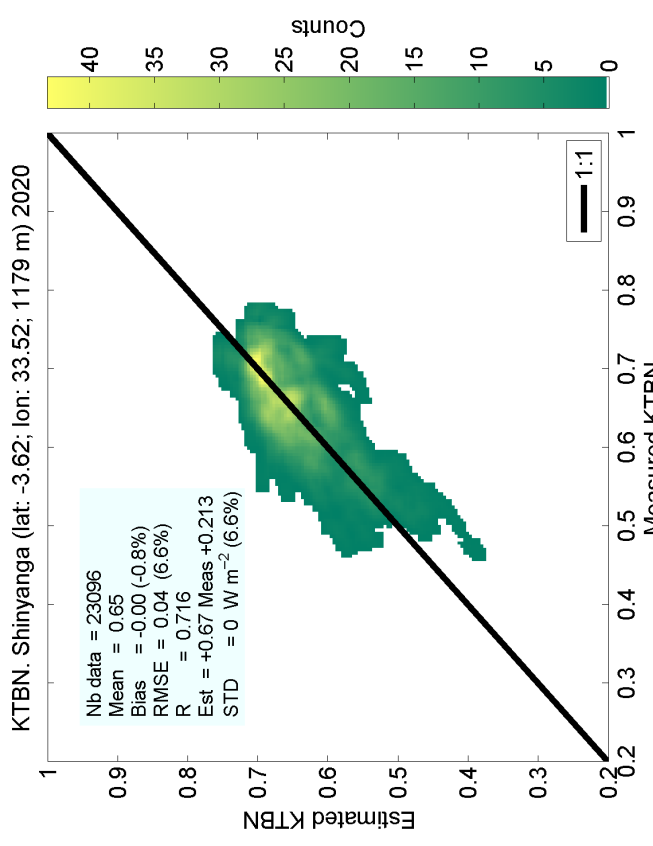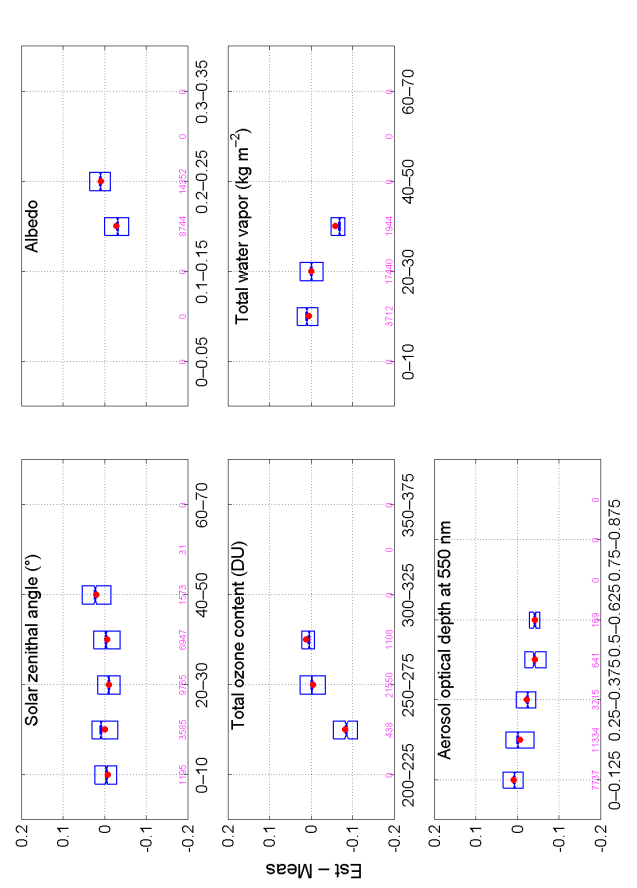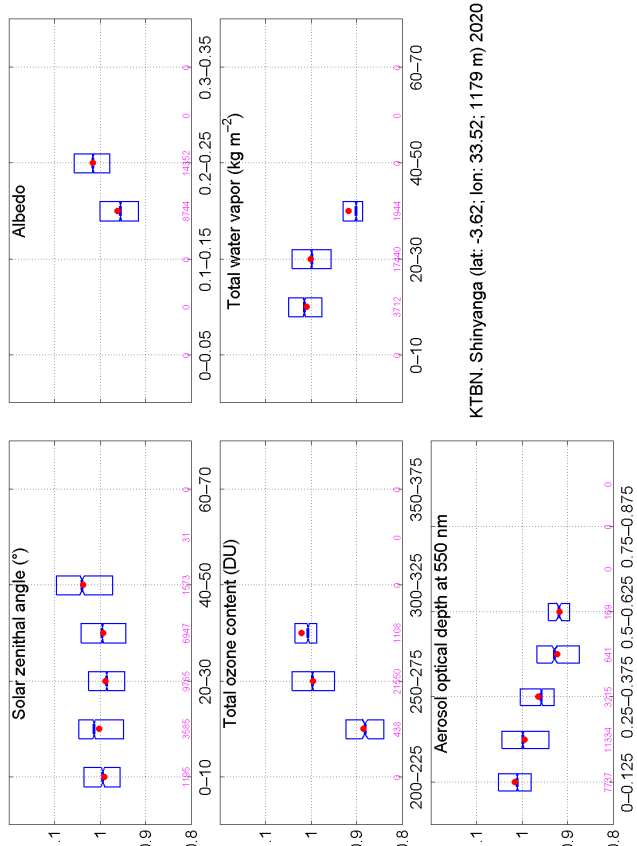

Figure S44: Comparison on direct clearness index at Shinyanga

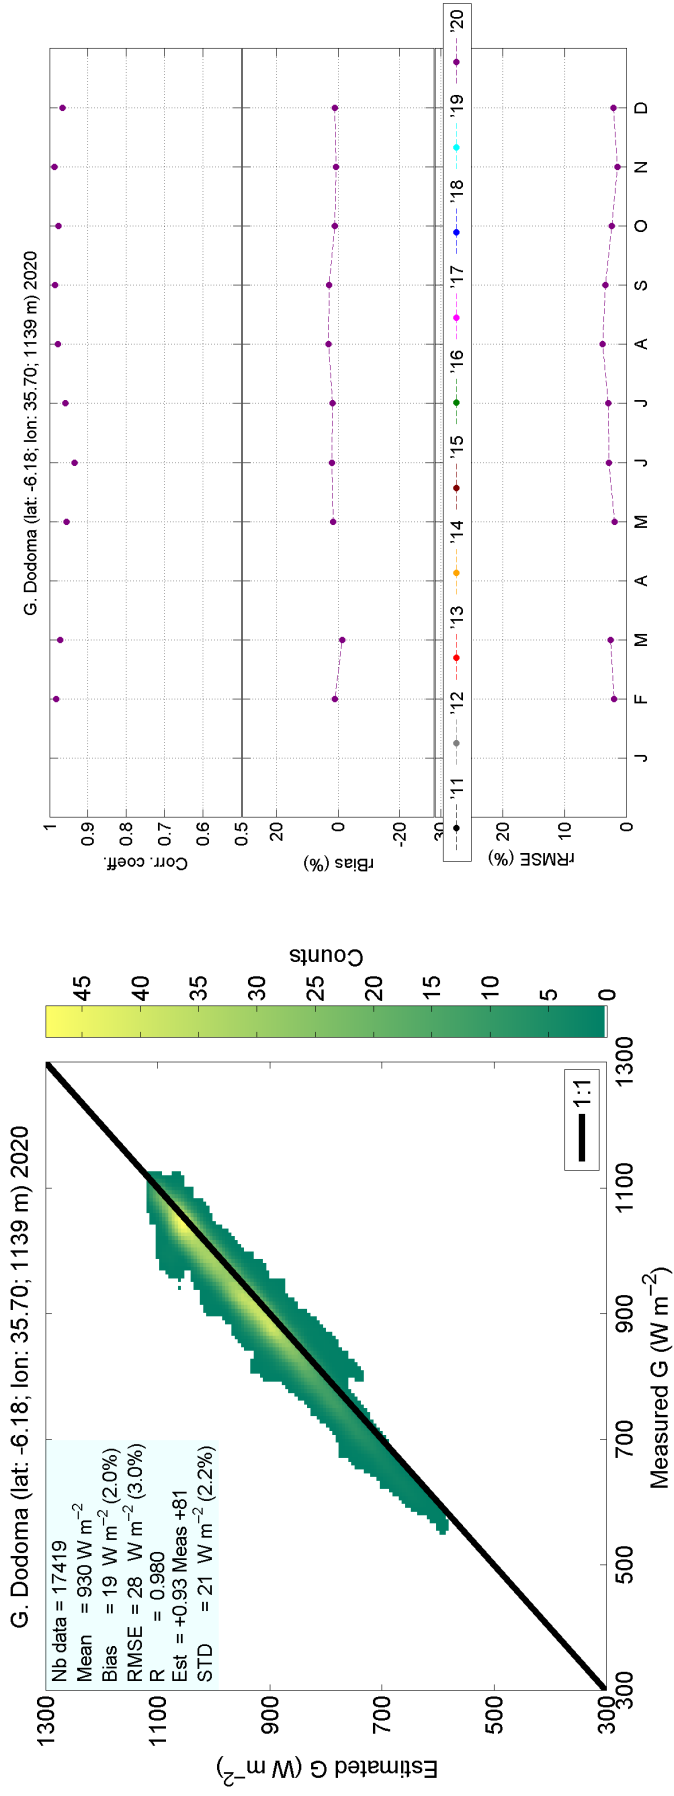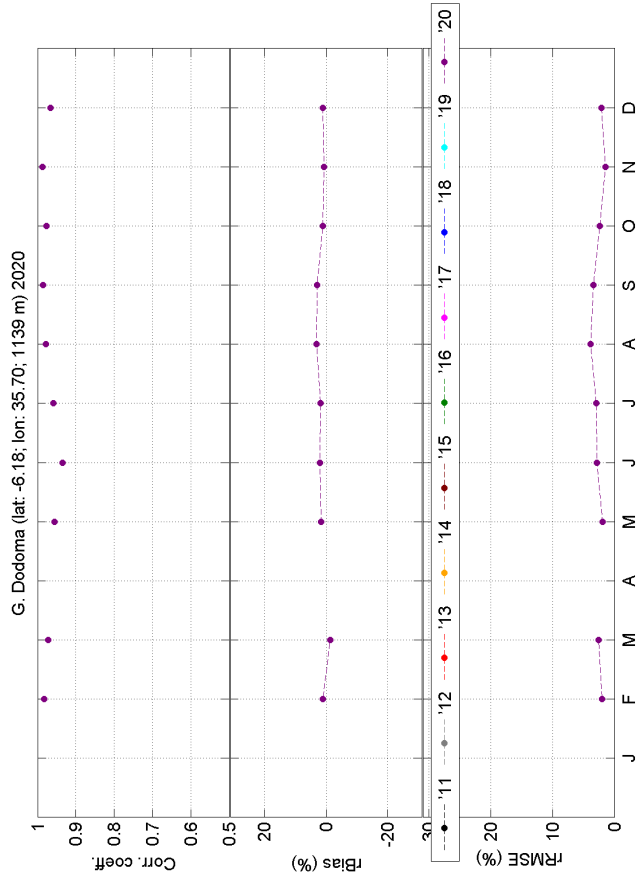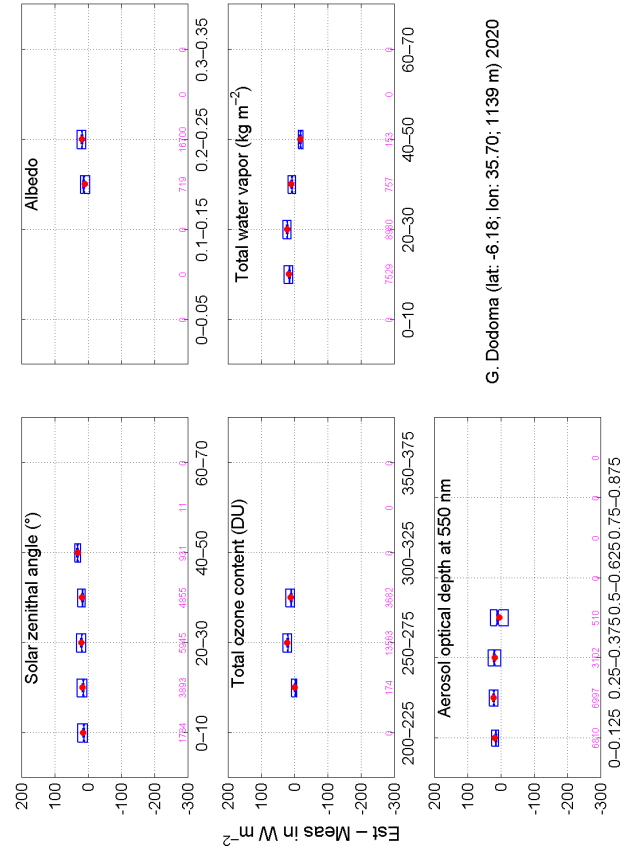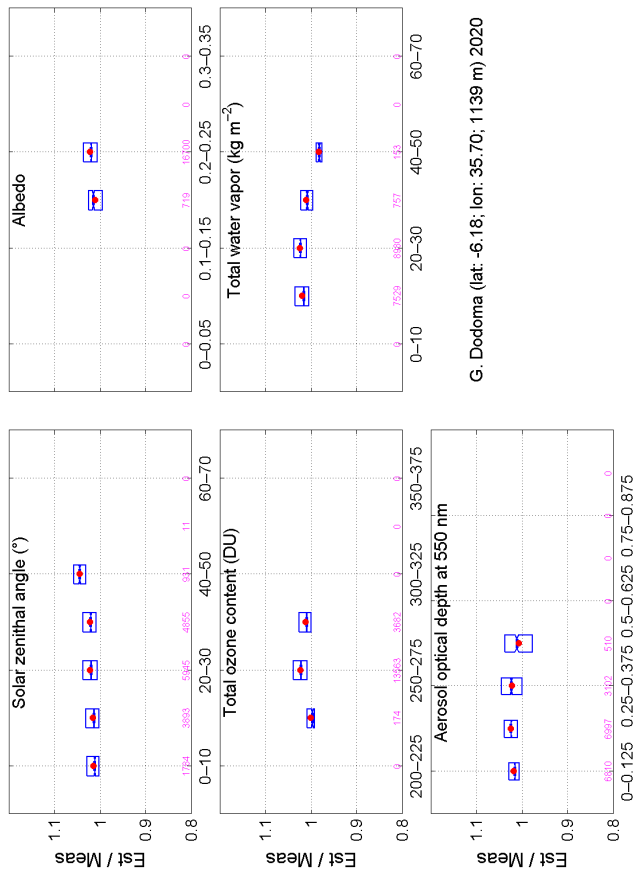

Figure S45: Comparison on global irradiance at Dodoma

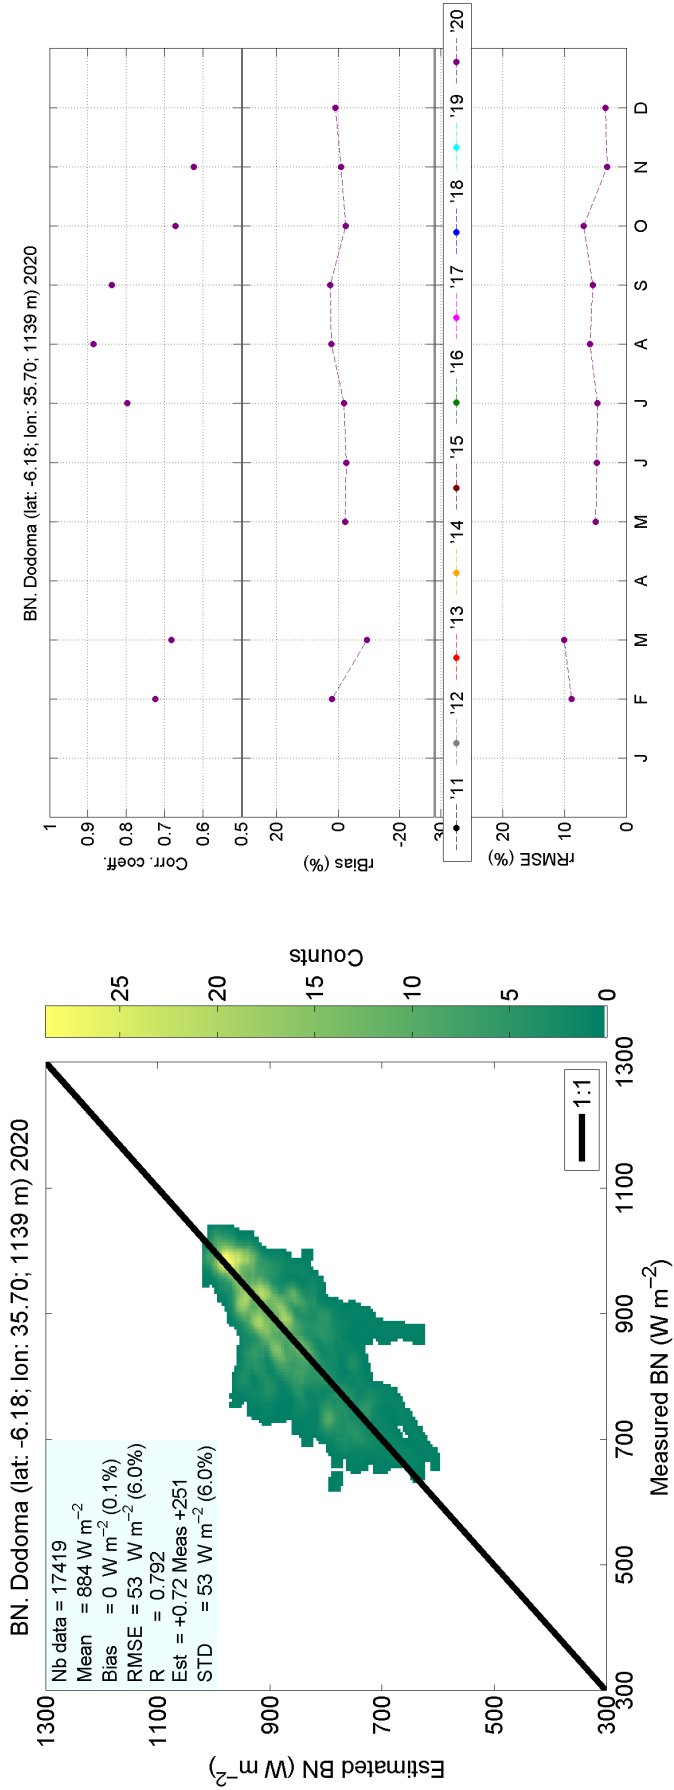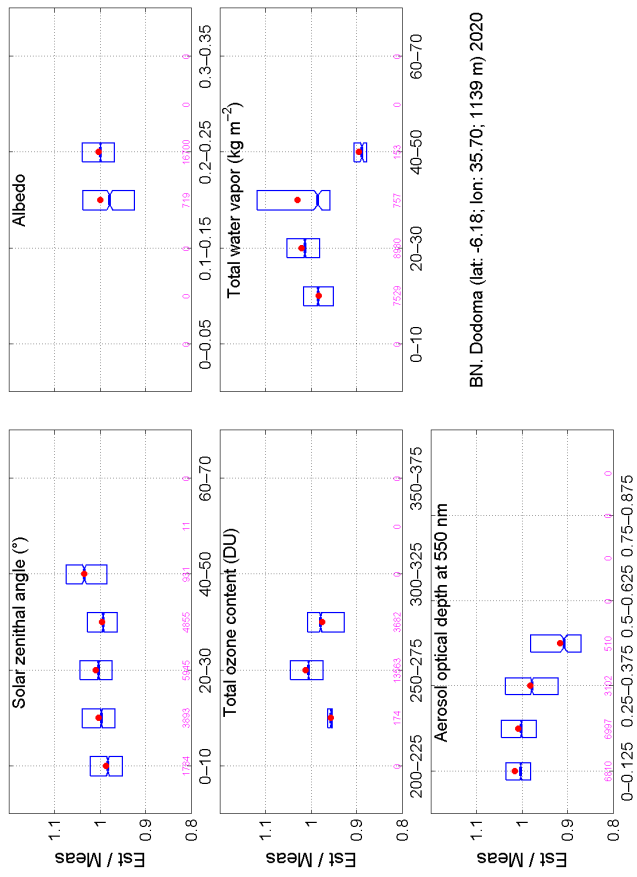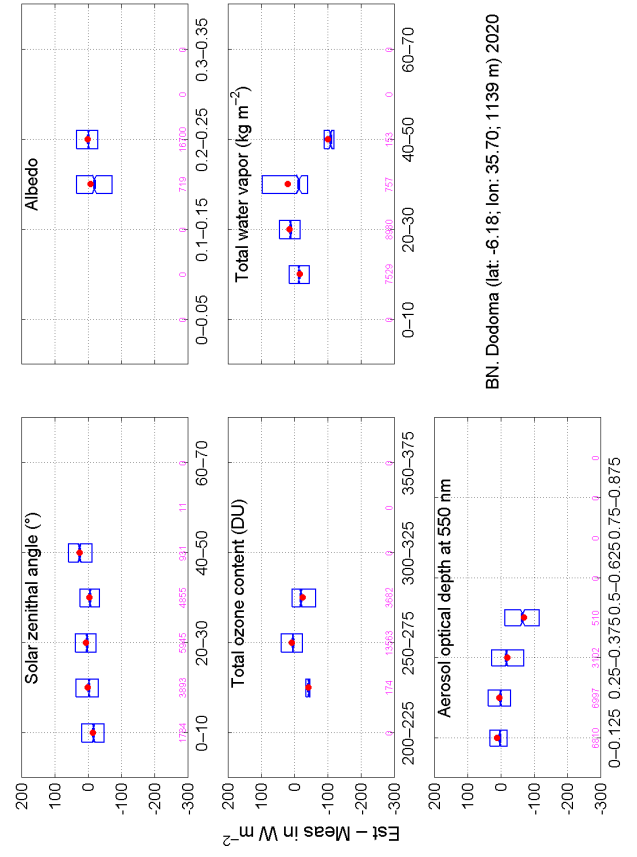

Figure S46: Comparison on direct component at normal irradiance at Dodoma



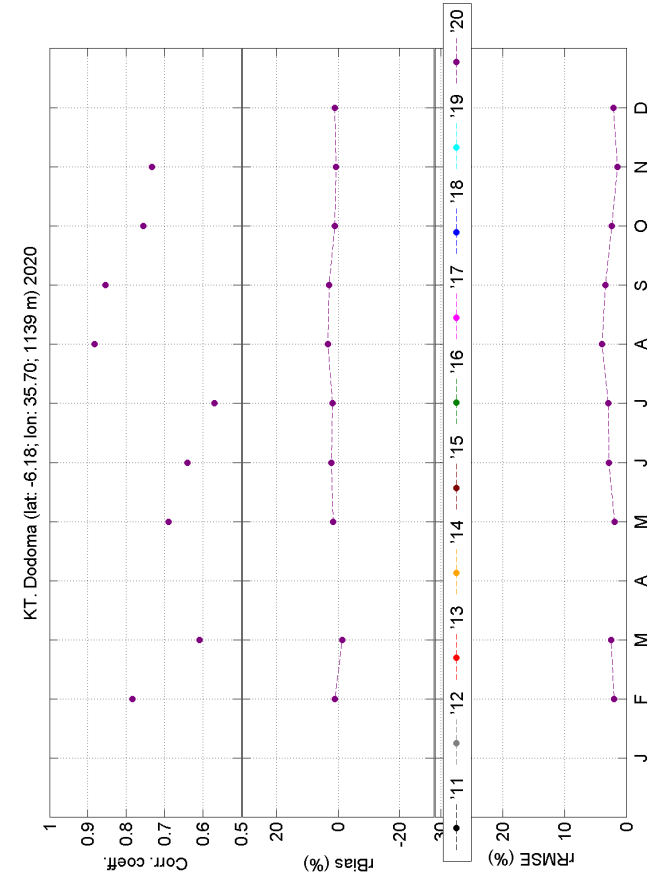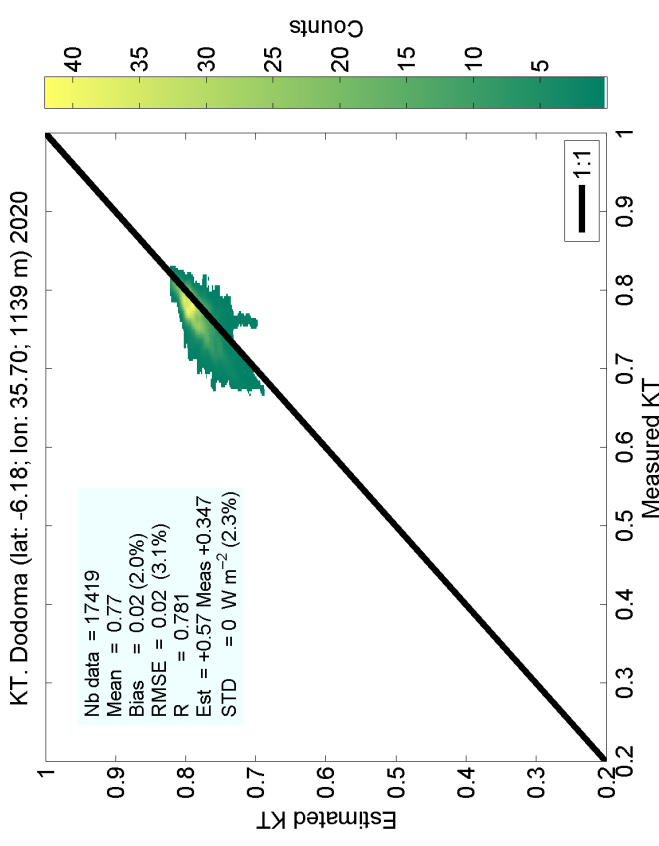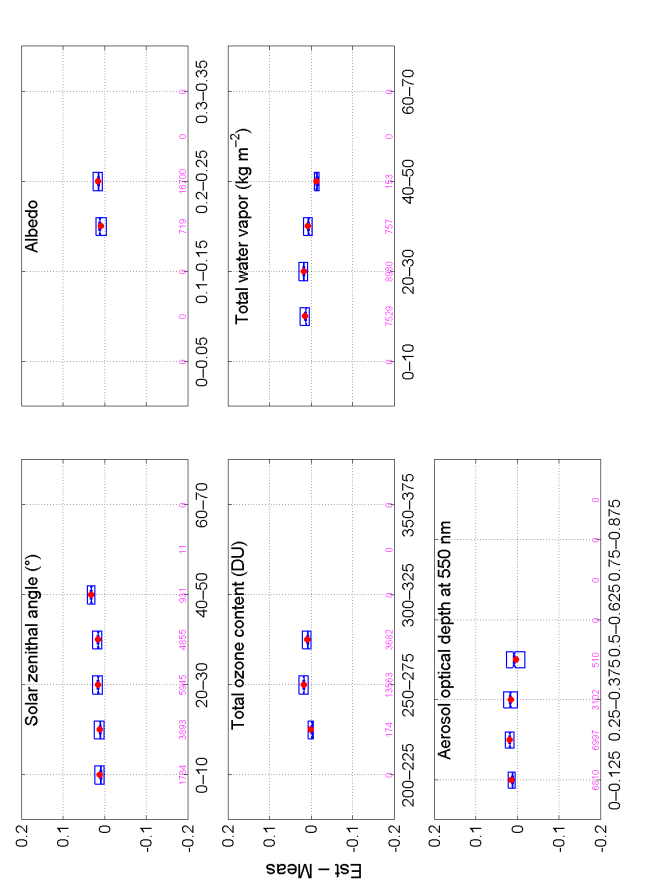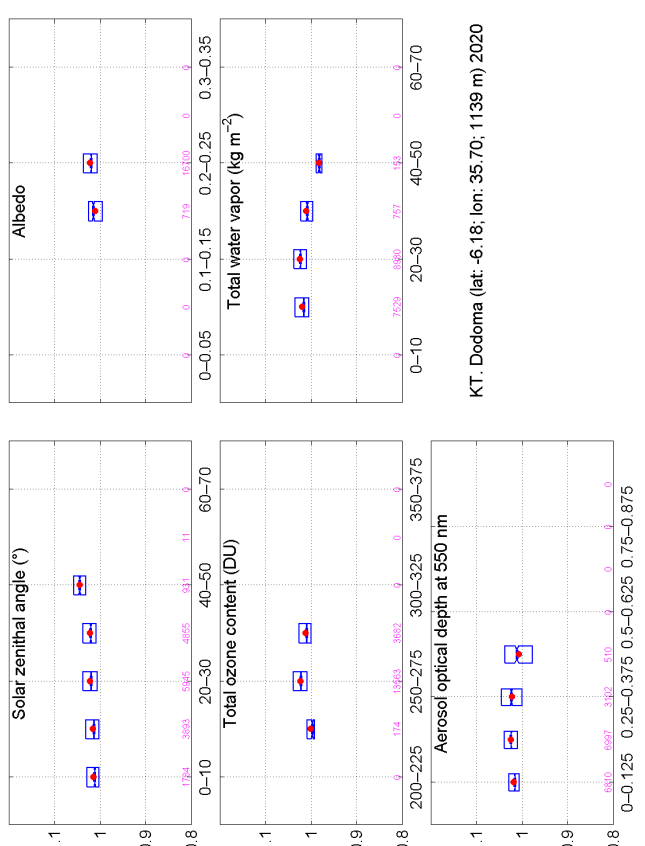

Figure S47: Comparison on clearness index at Dodoma

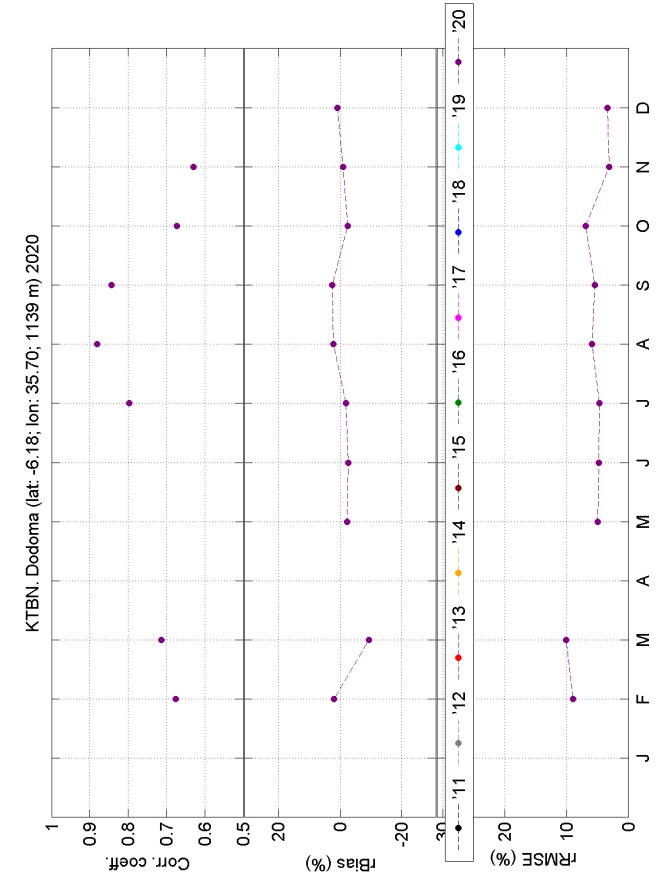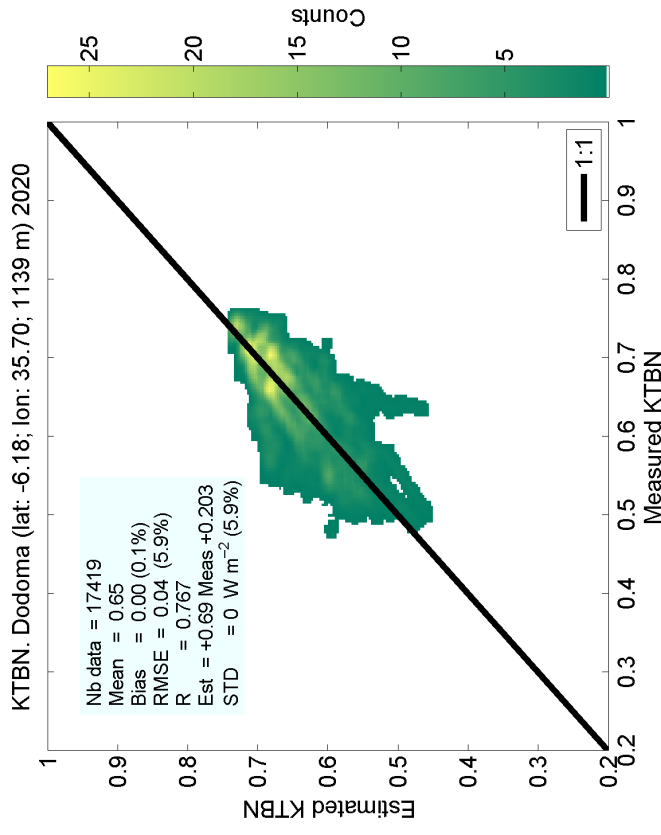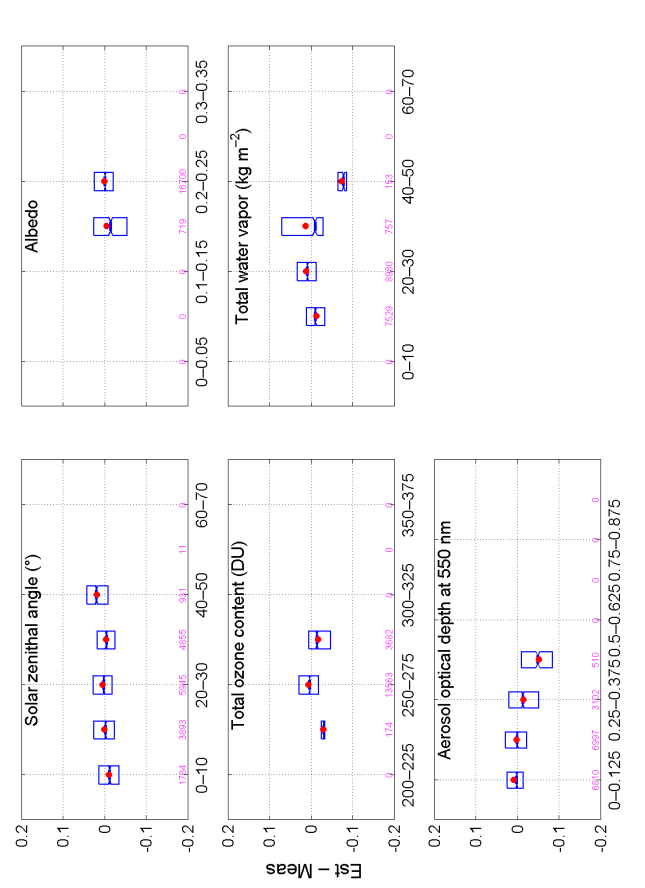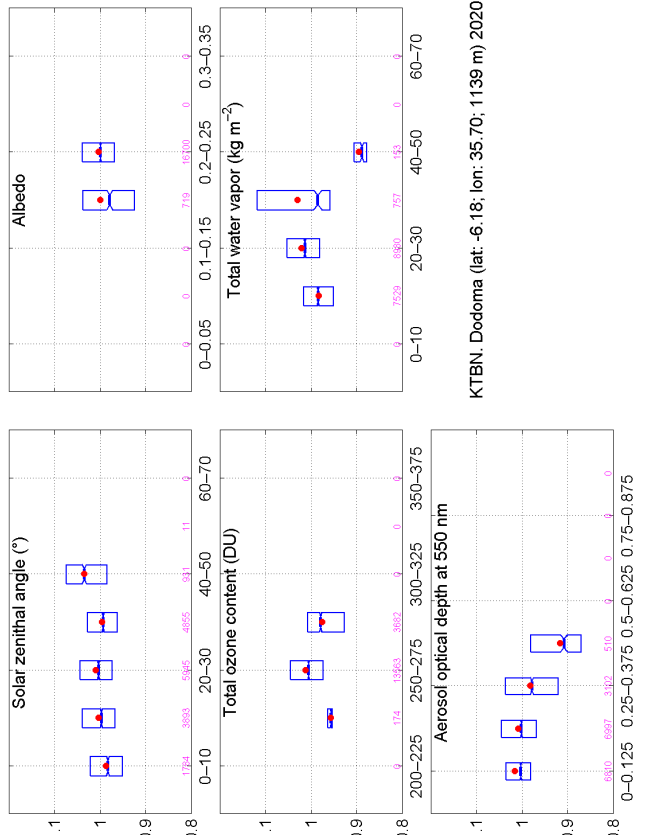

Figure S48: Comparison on direct clearness index at Dodoma

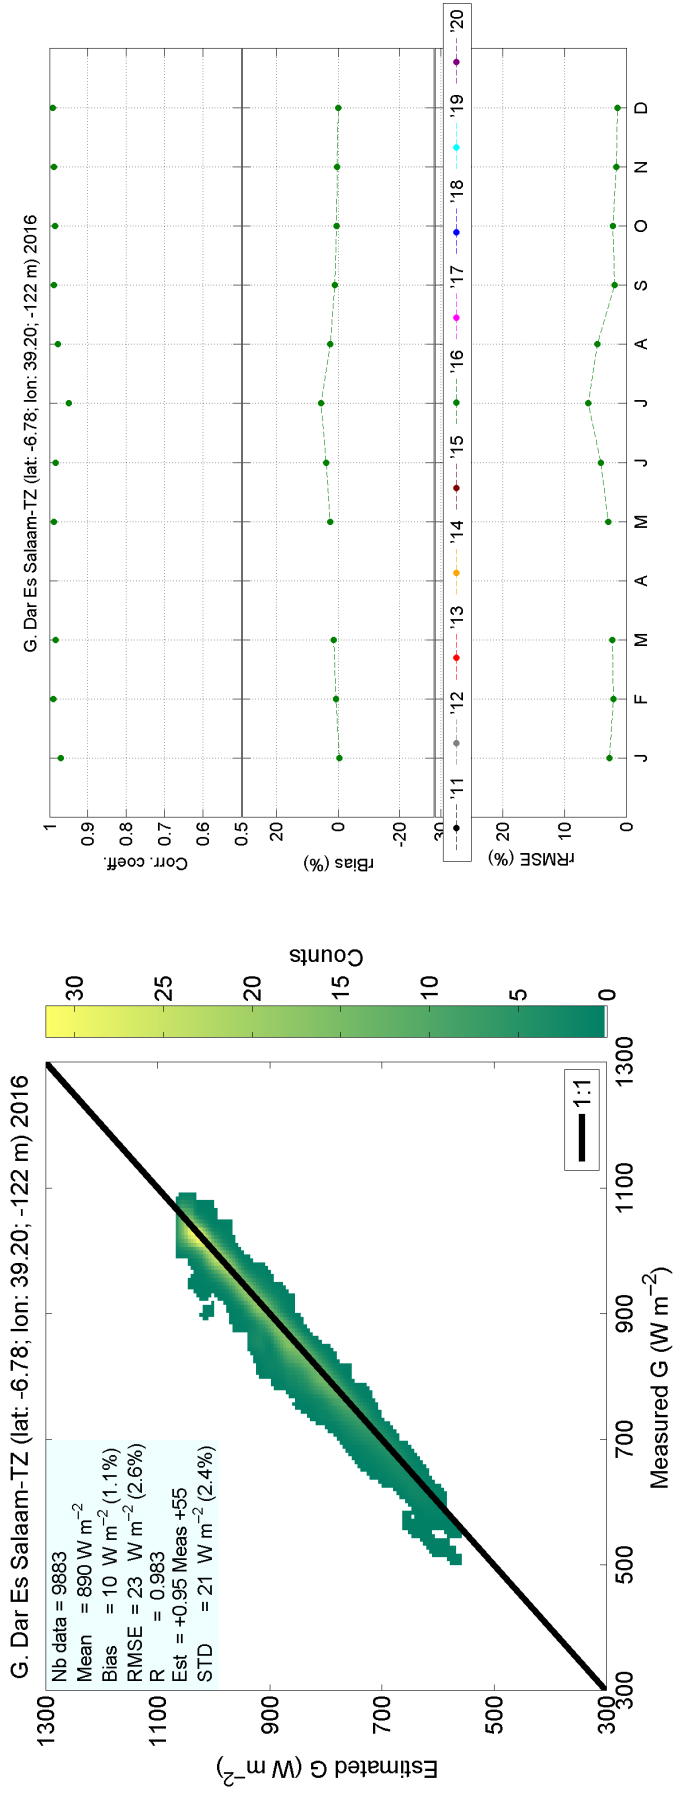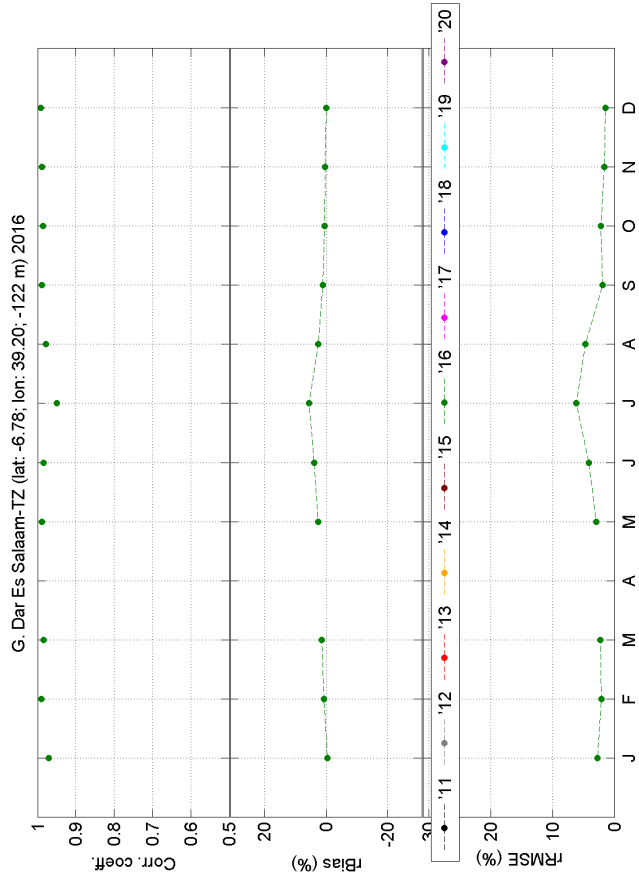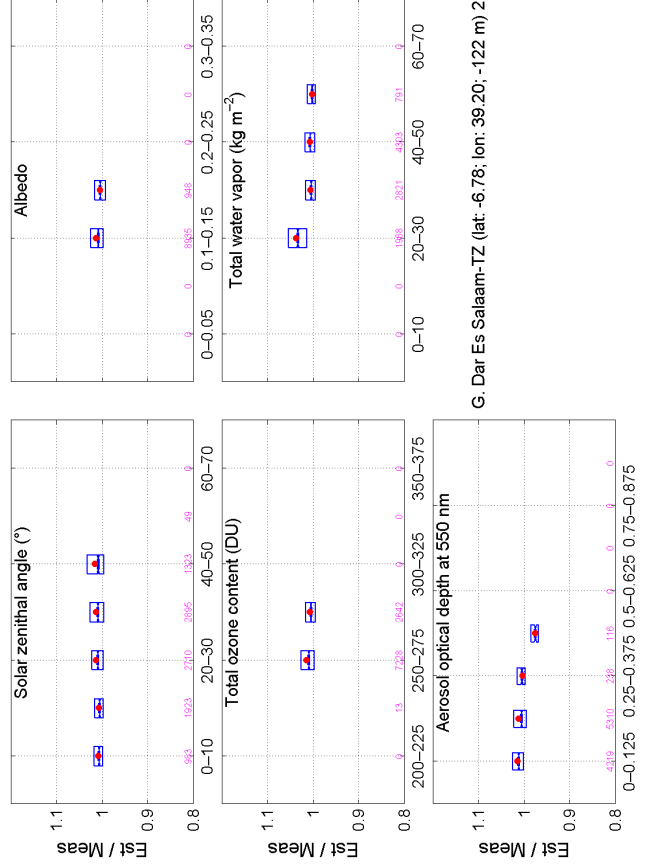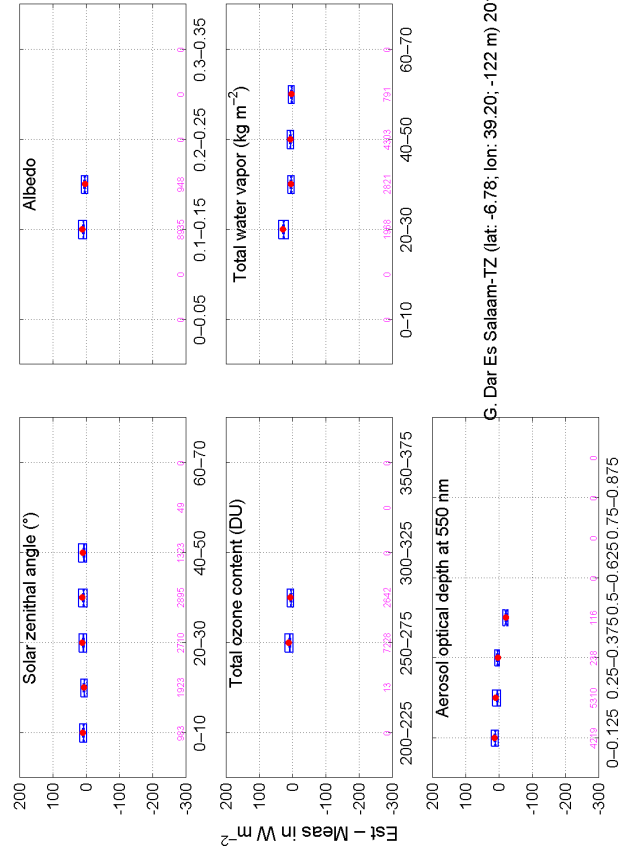

Figure S49: Comparison on global irradiance at Dar Es Salaam-TZ

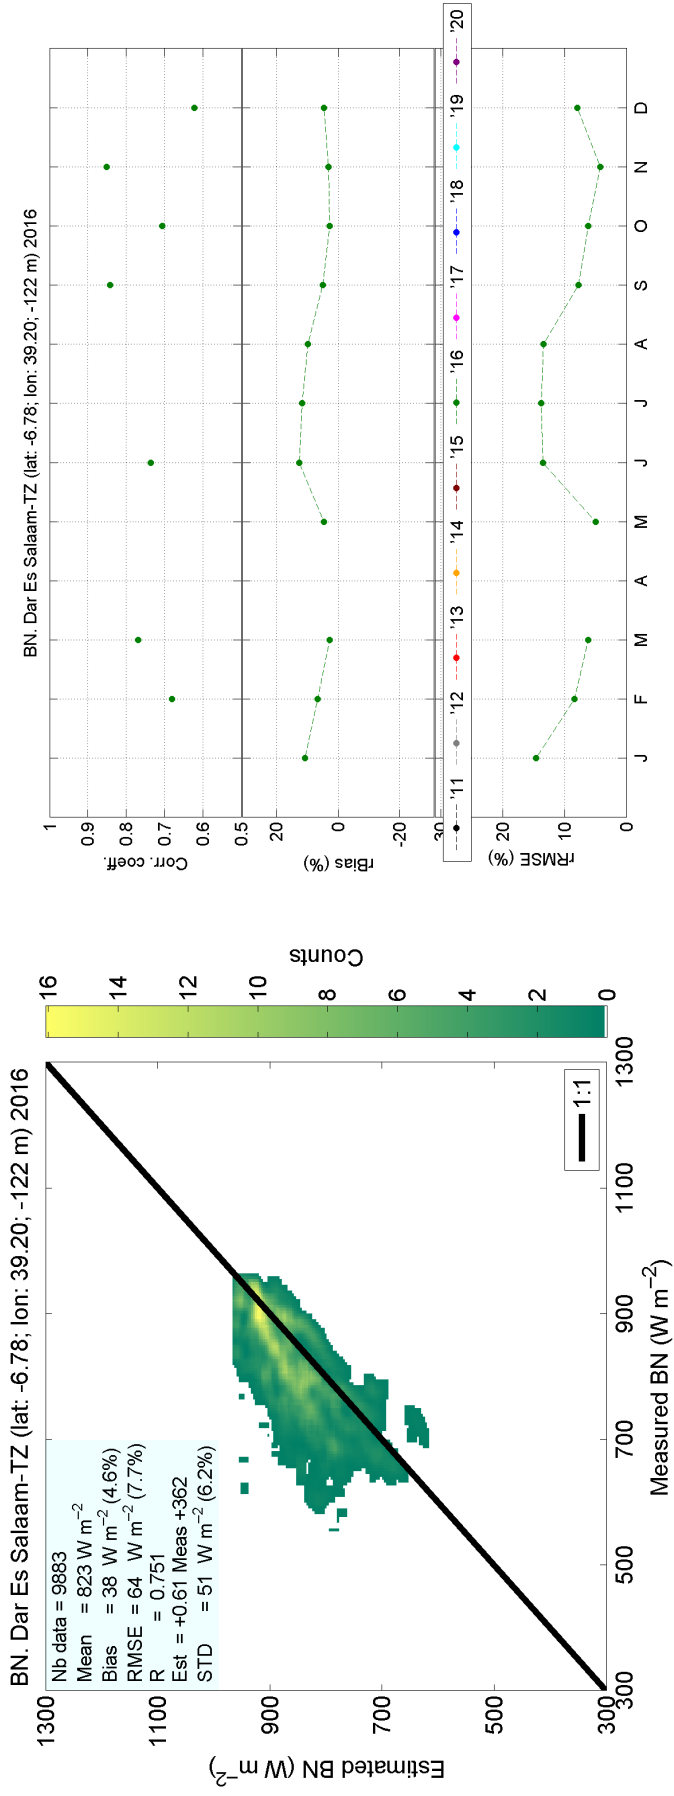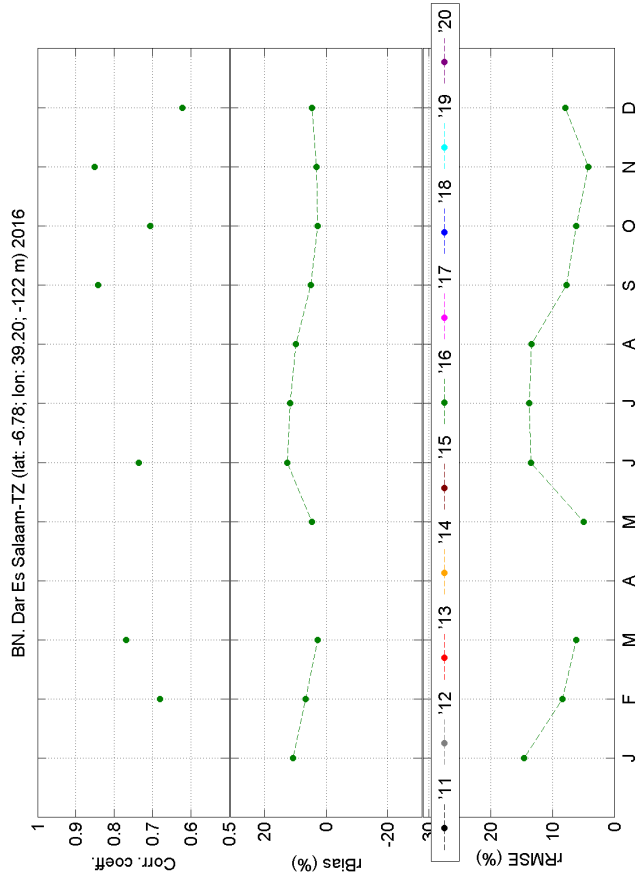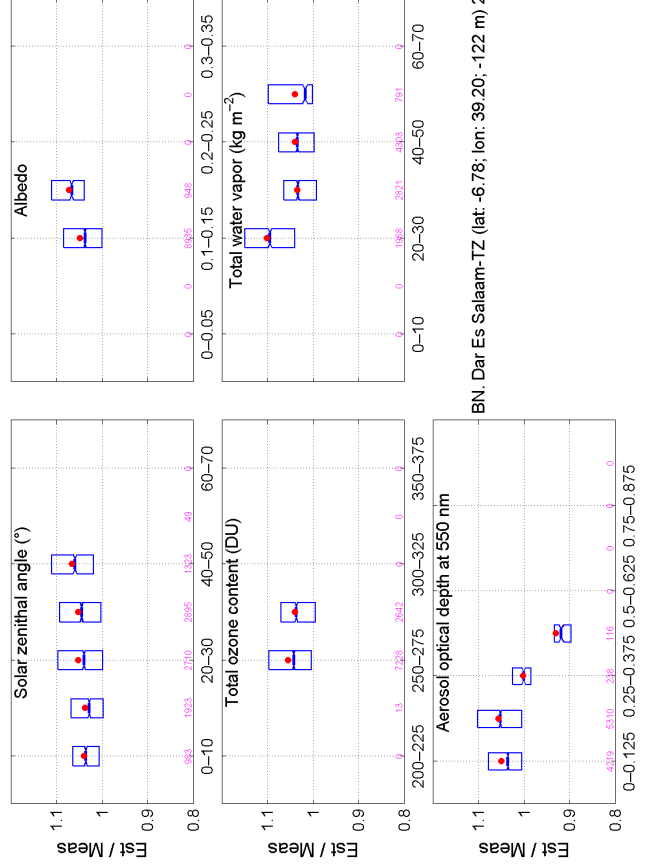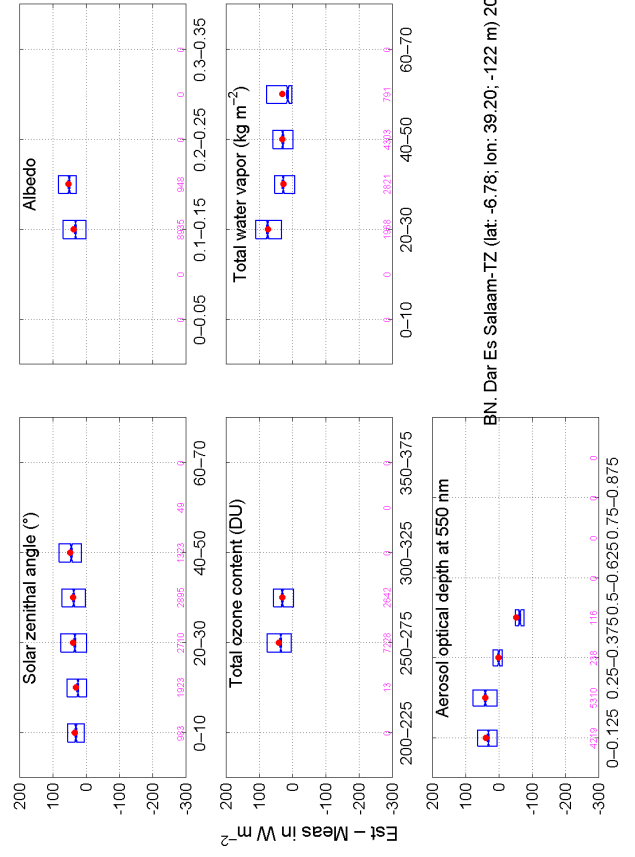

Figure S50: Comparison on direct component at normal irradiance at Dar Es Salaam-TZ

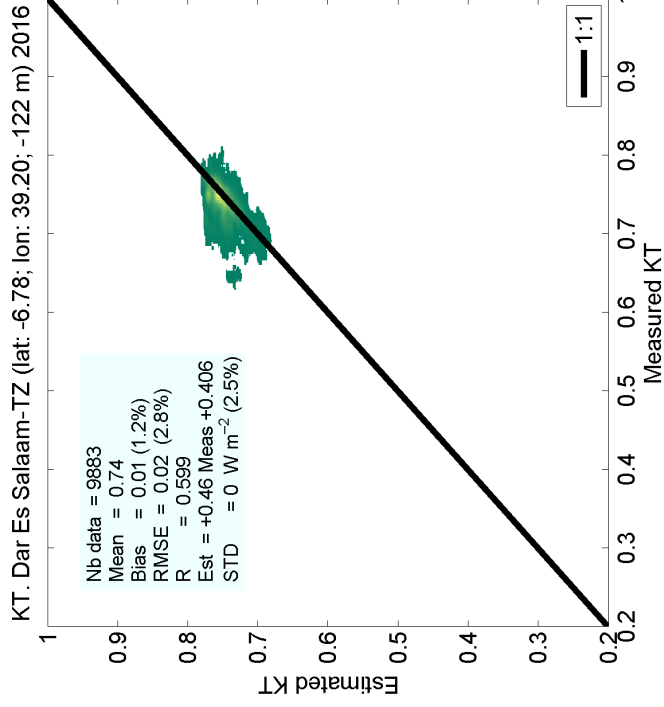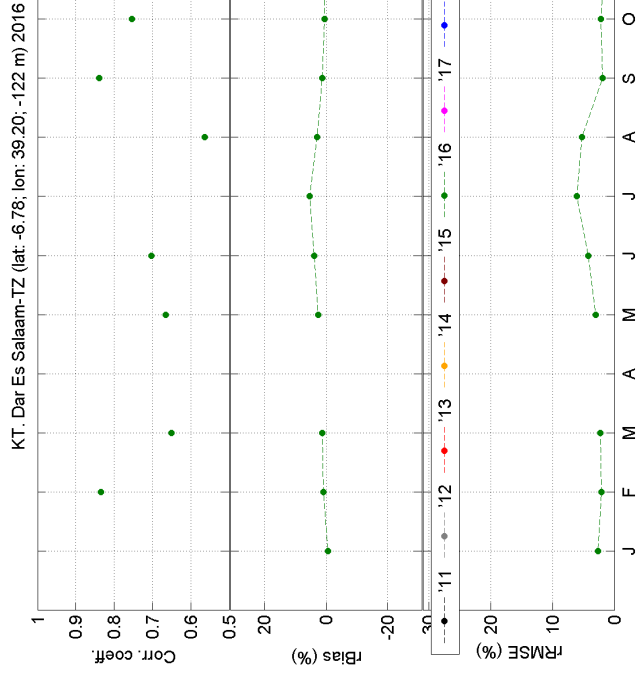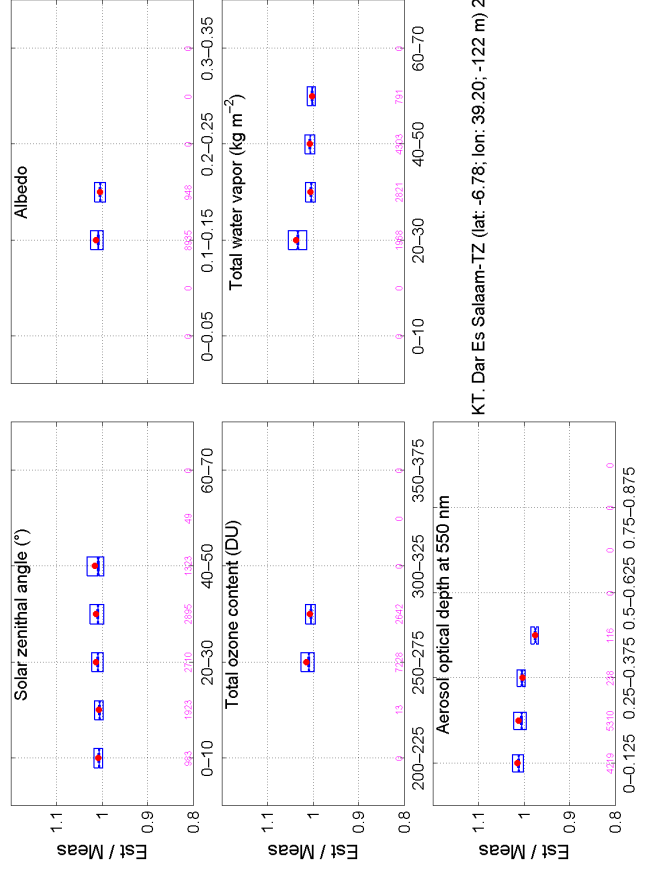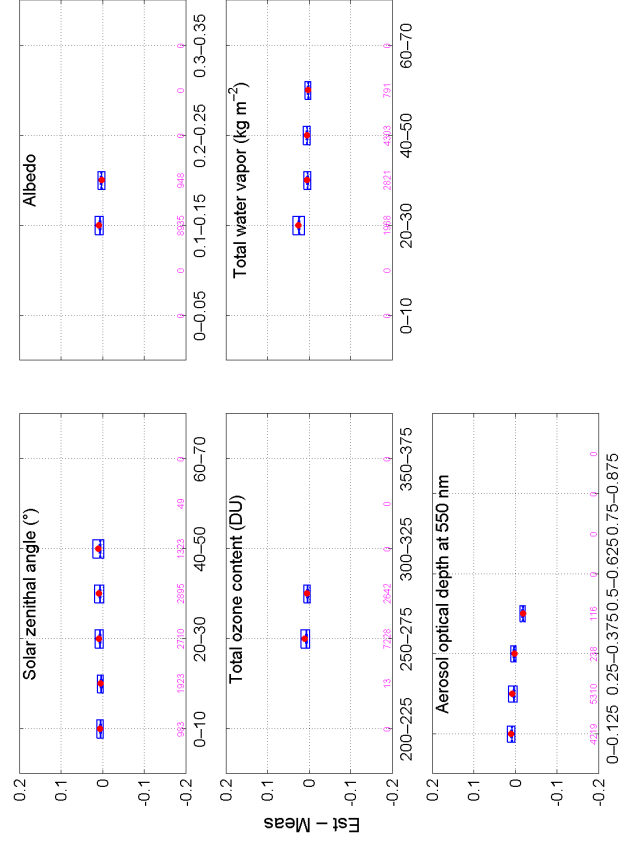

Figure S51: Comparison on clearness index at Dar Es Salaam-TZ

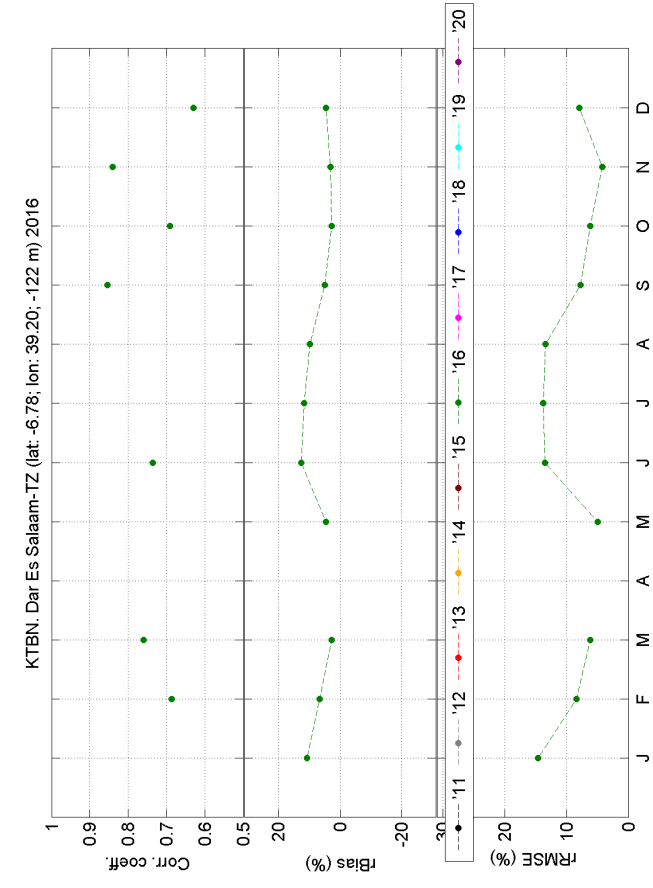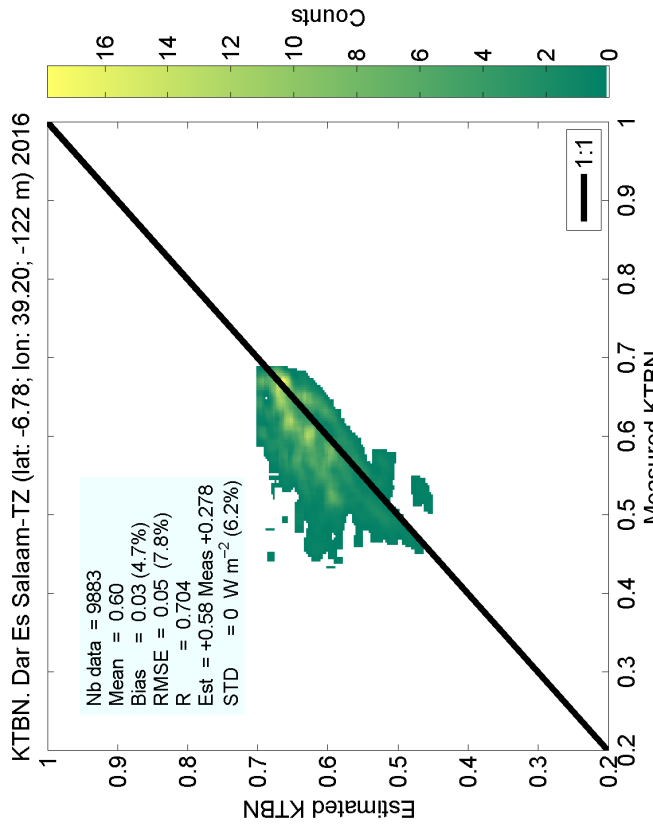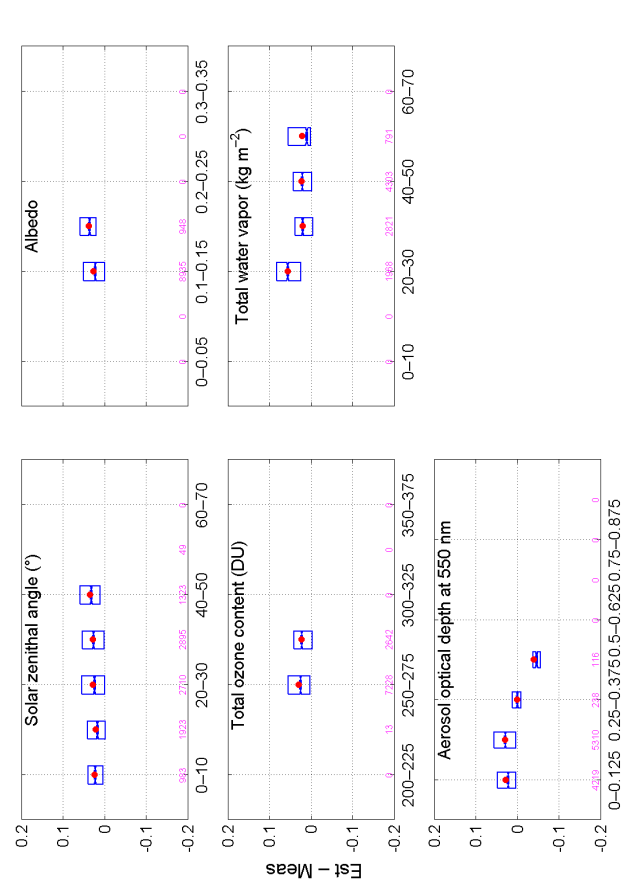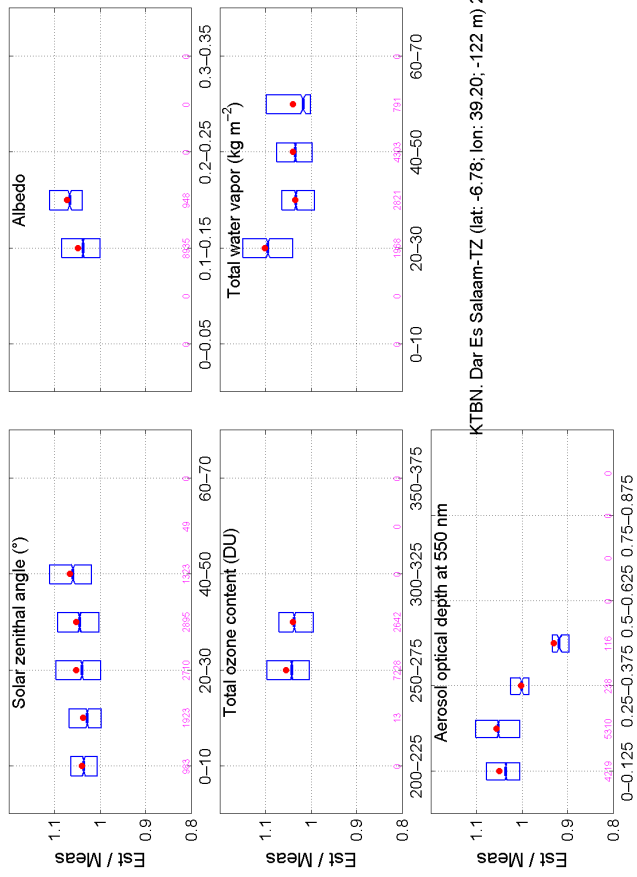

Figure S52: Comparison on direct clearness index at Dar Es Salaam-TZ

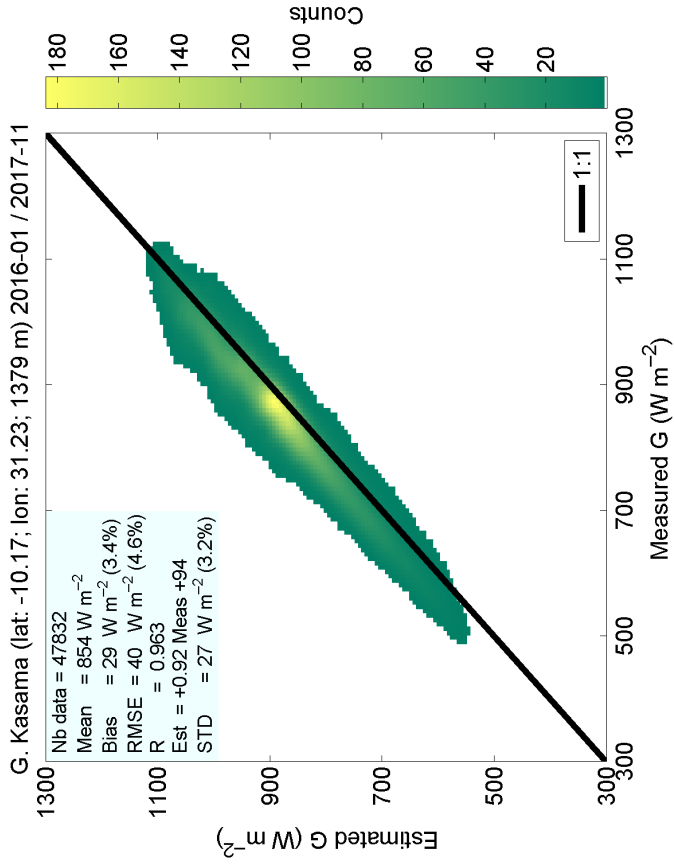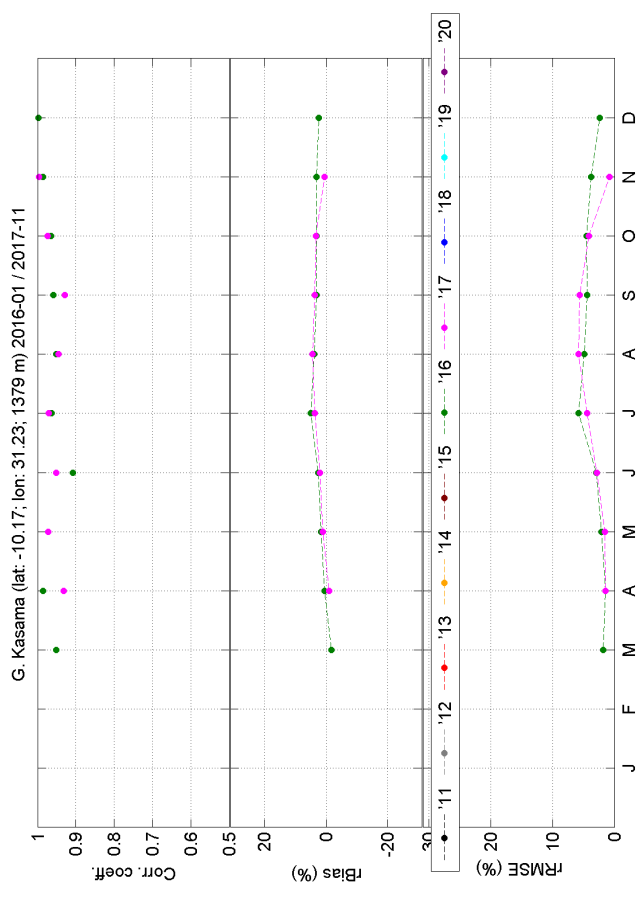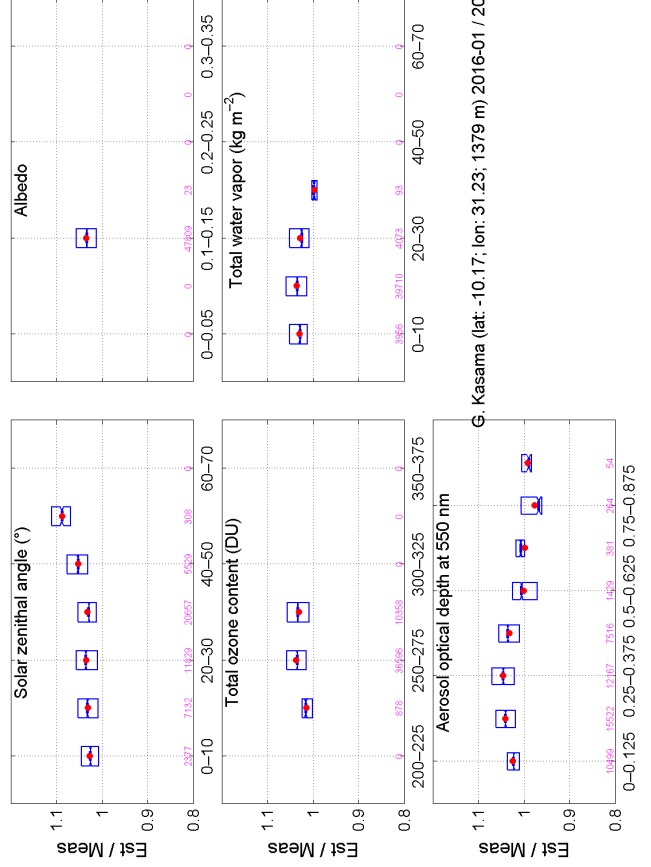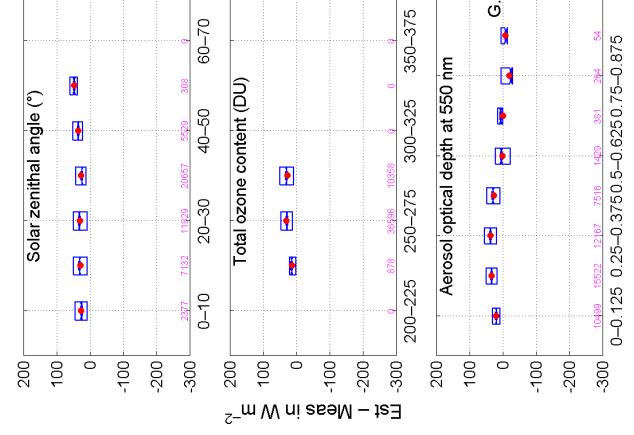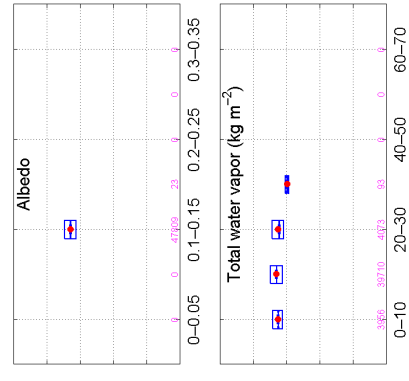

Figure S53: Comparison on global irradiance at Kasama

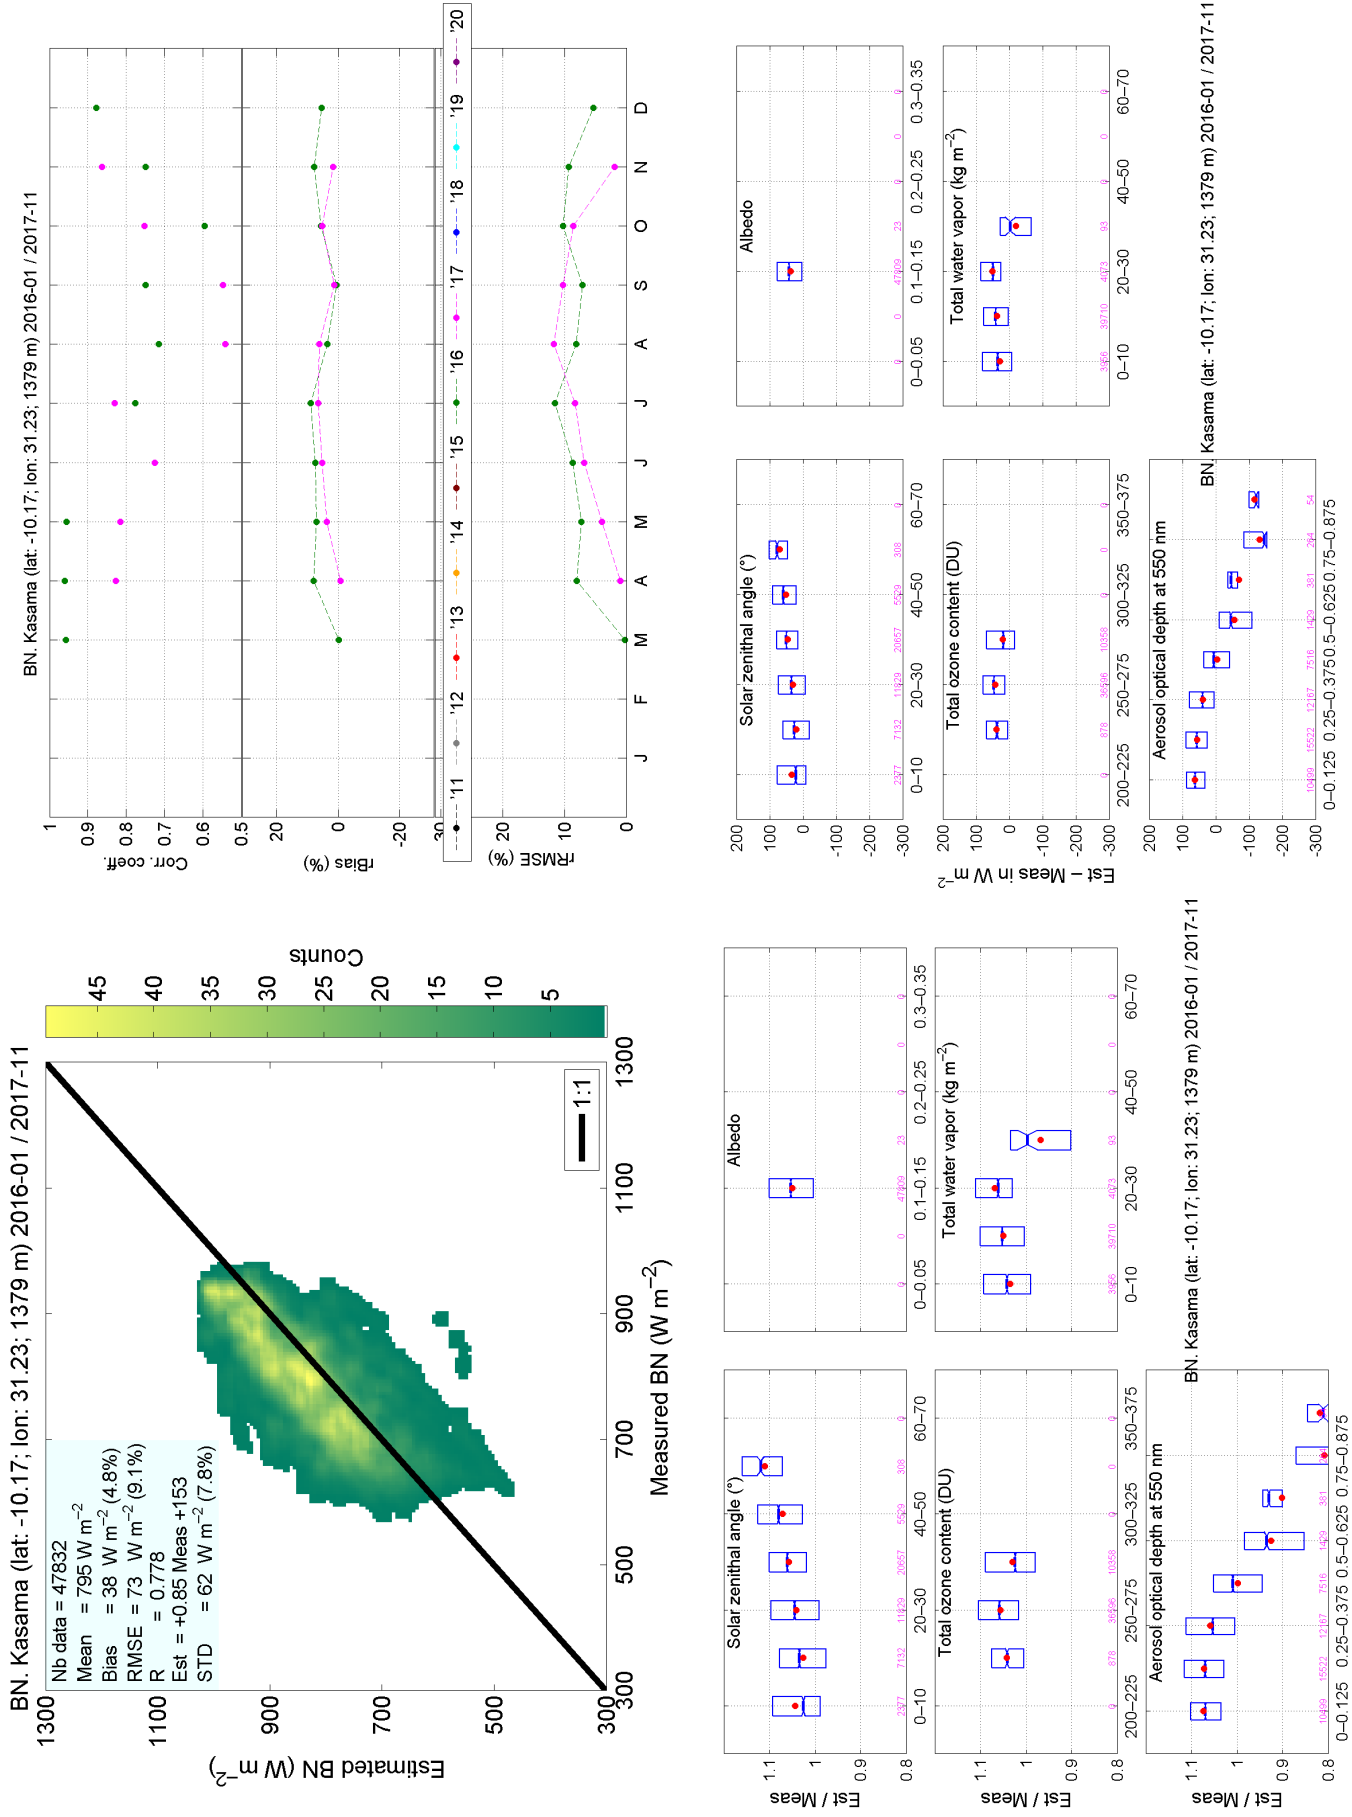

Figure S54: Comparison on direct component at normal irradiance at Kasama



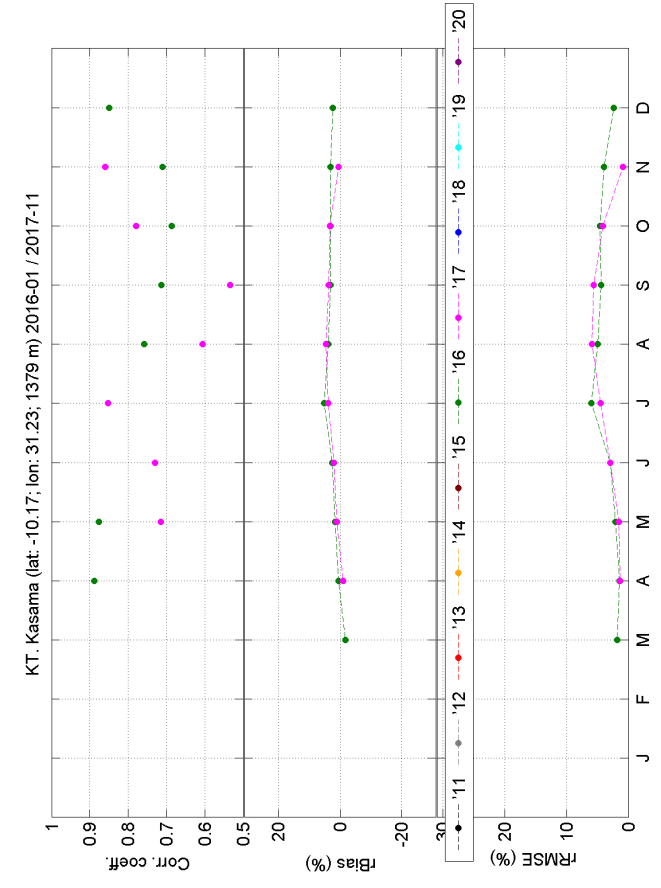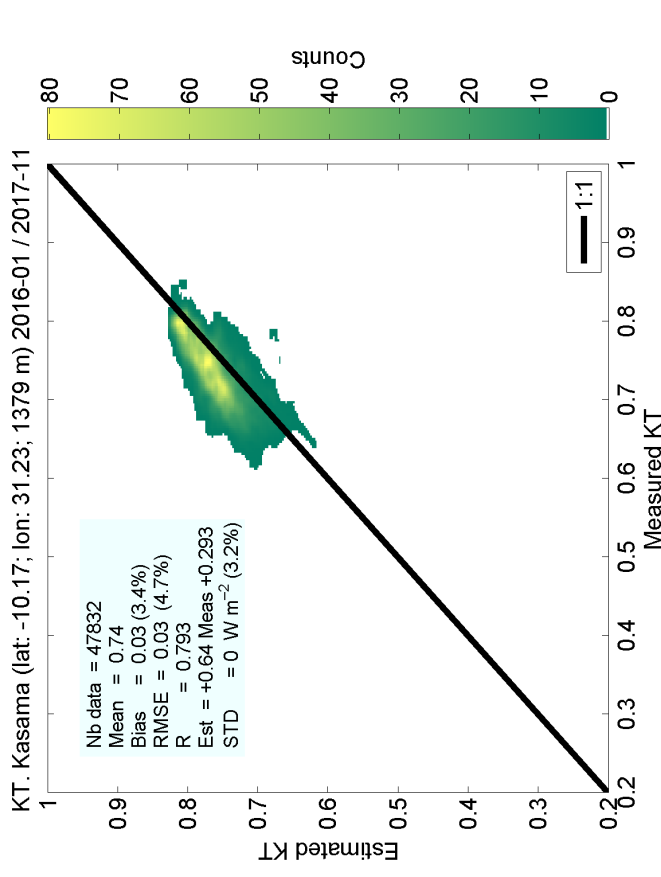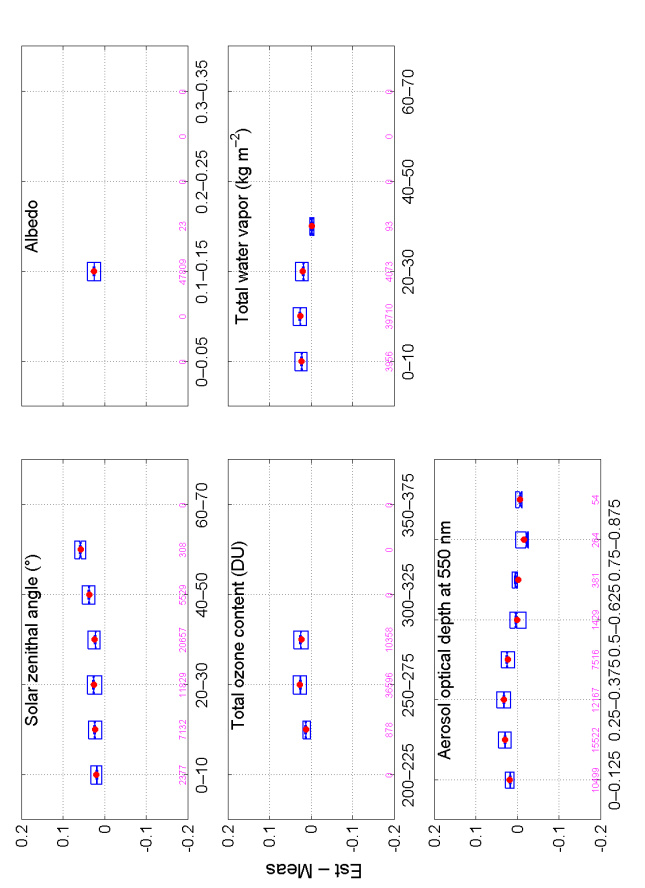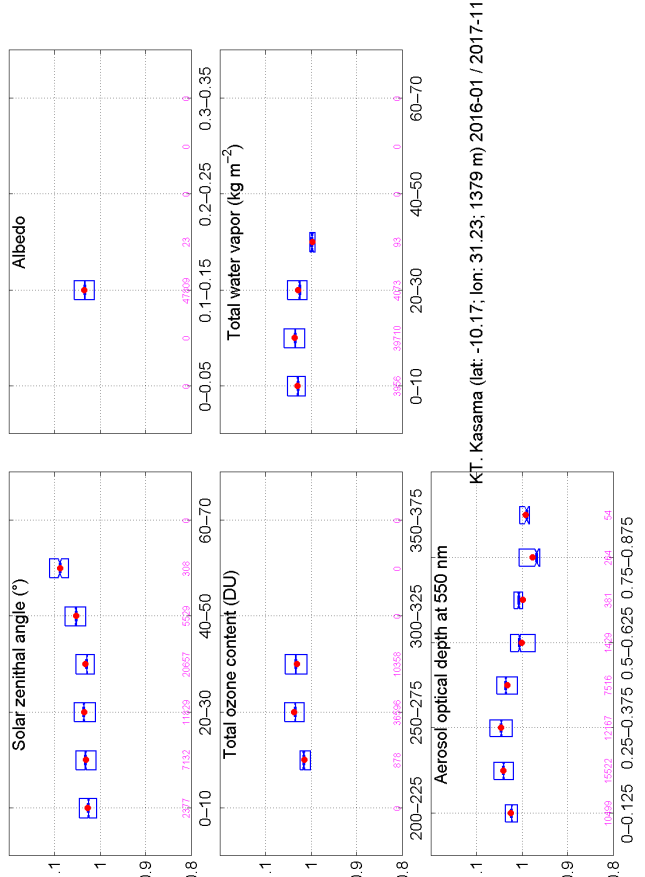

Figure S55: Comparison on clearness index at Kasama

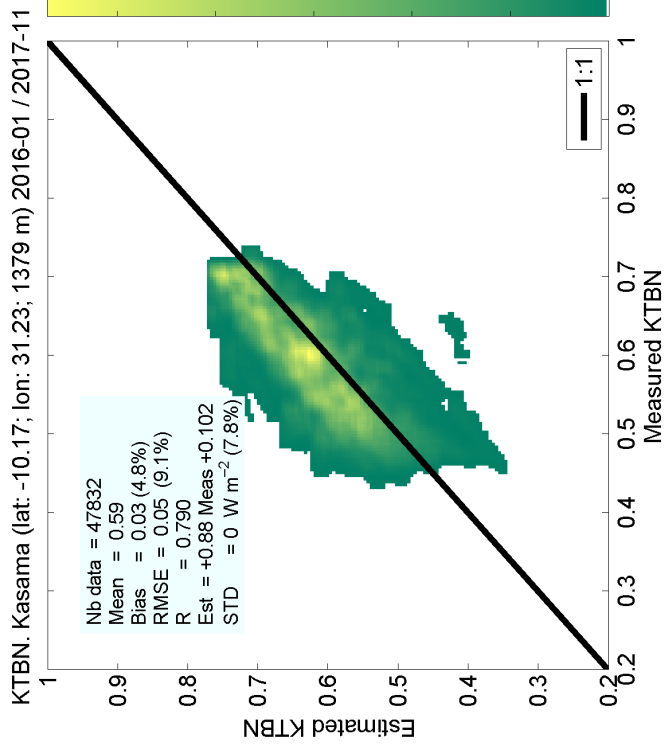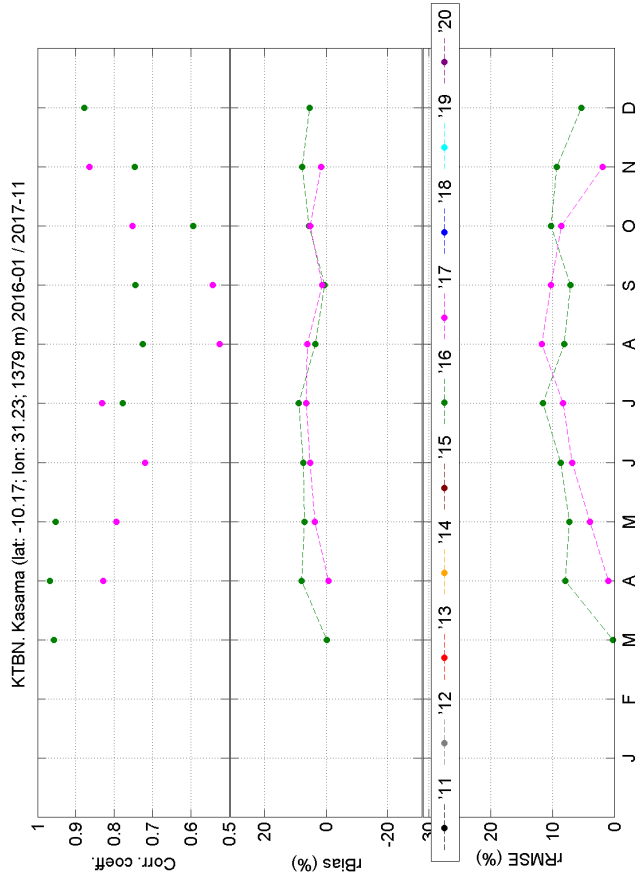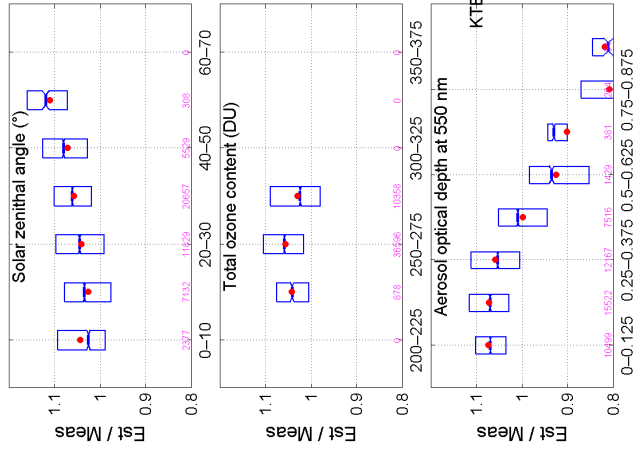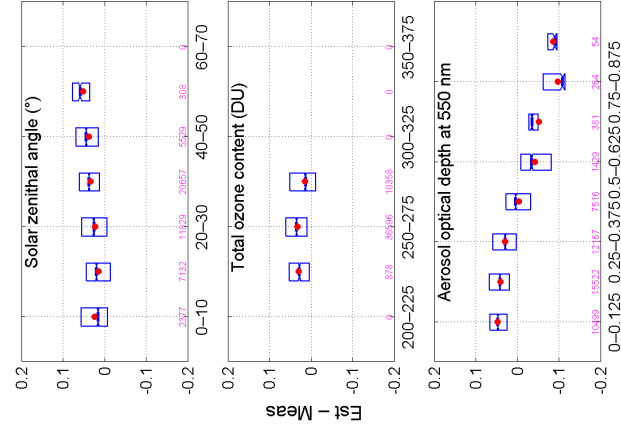

Figure S56: Comparison on direct clearness index at Kasama

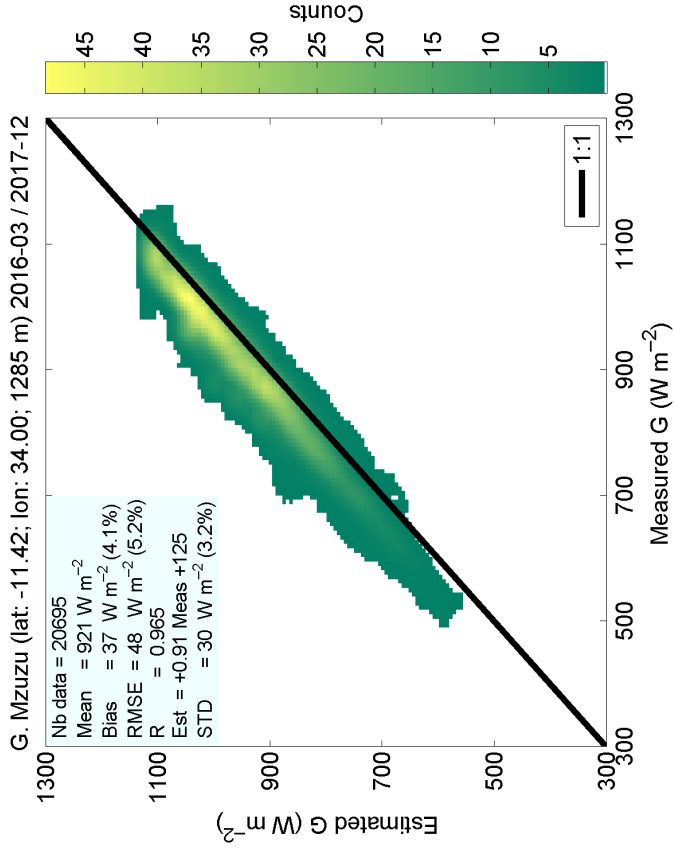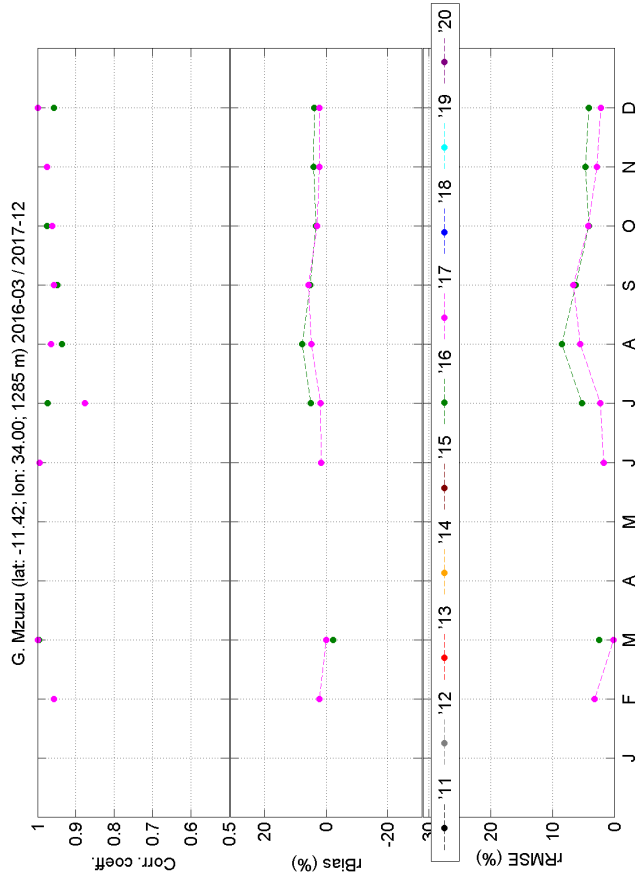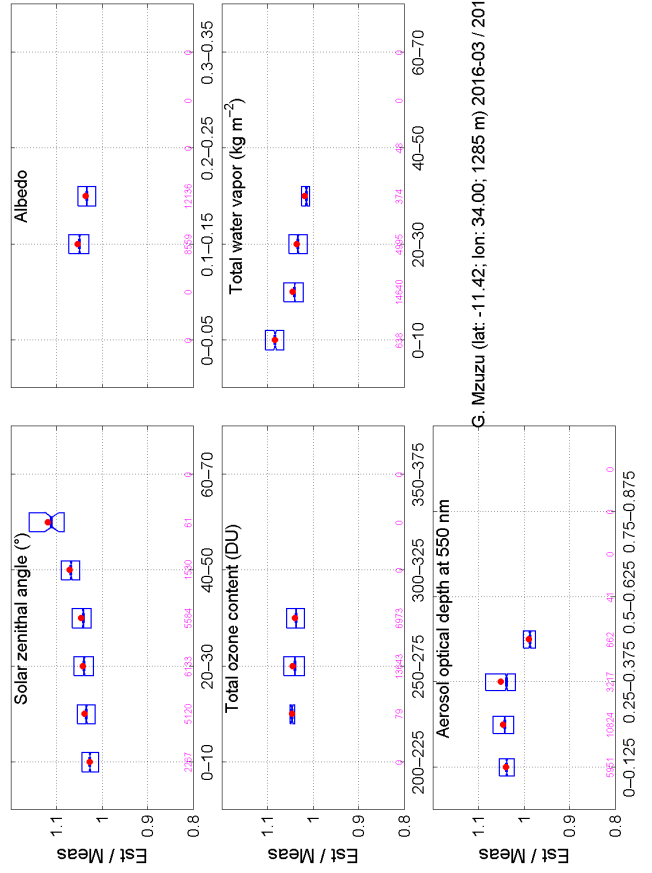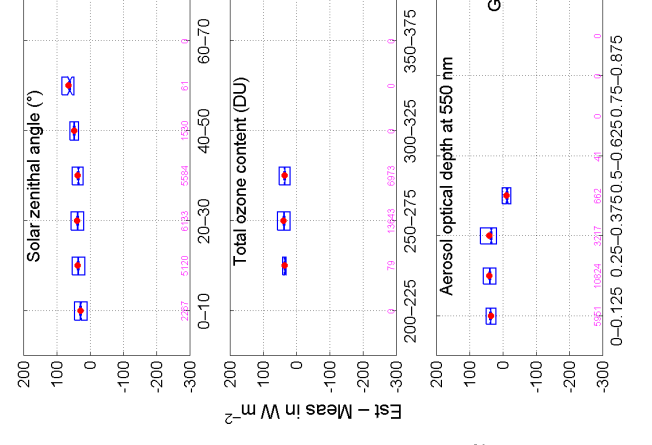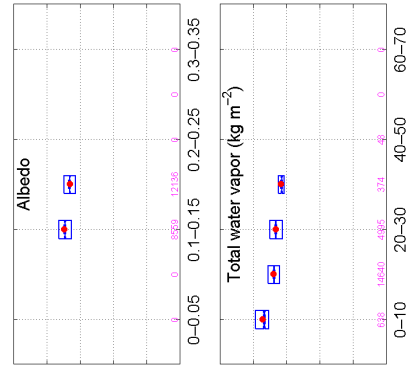

Figure S57: Comparison on global irradiance at Mizuzu

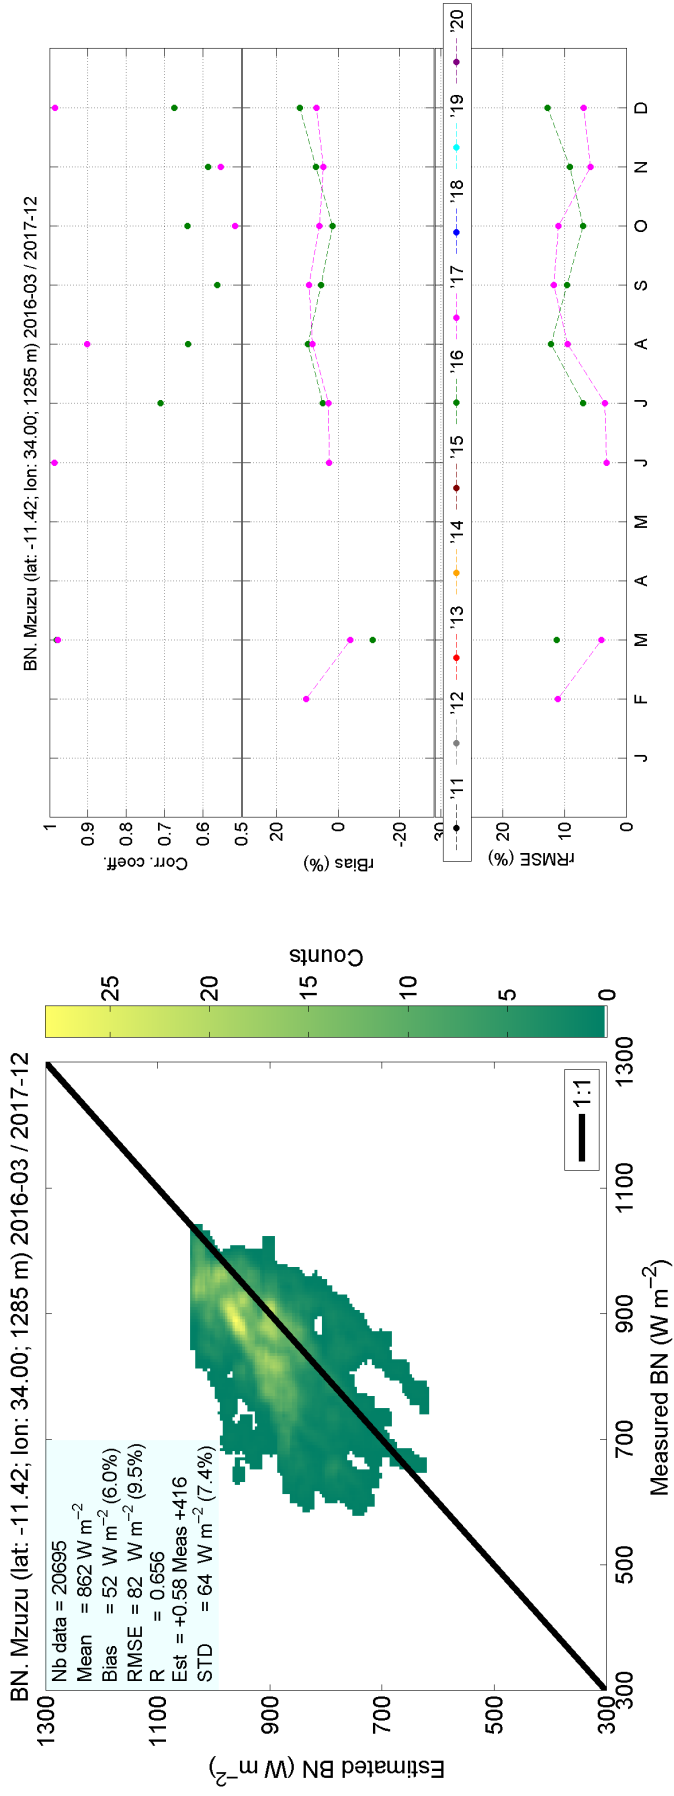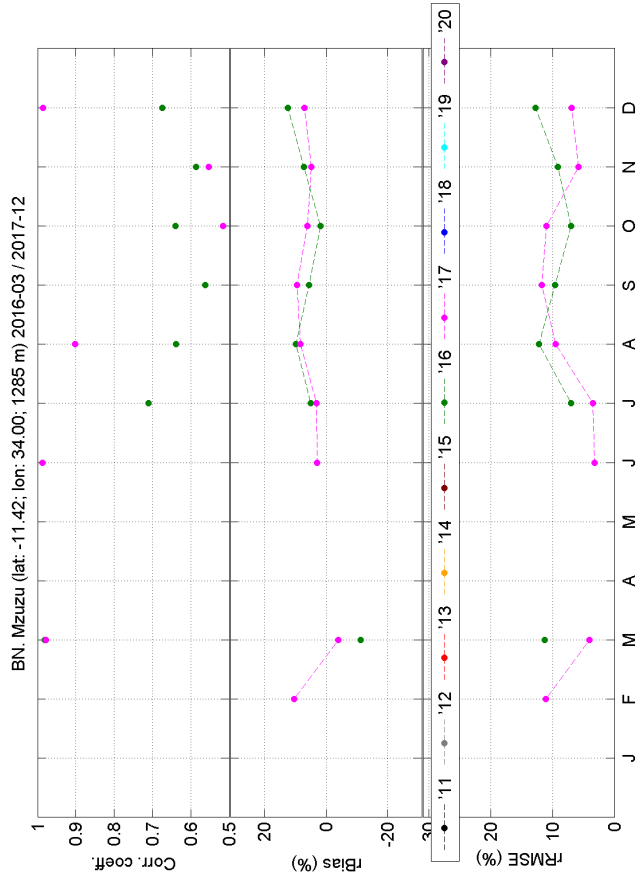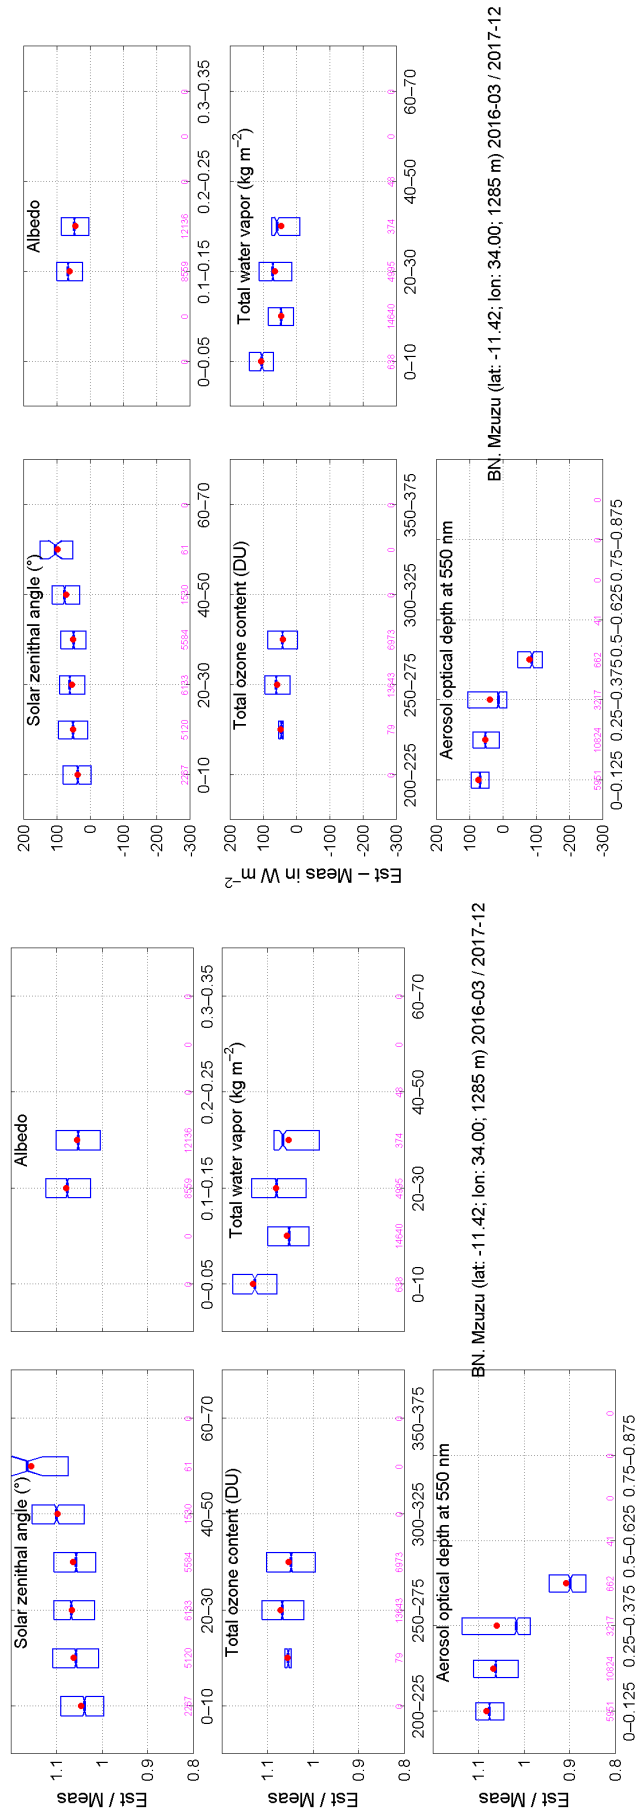

Figure S58: Comparison on direct component at normal irradiance at Mzuzu

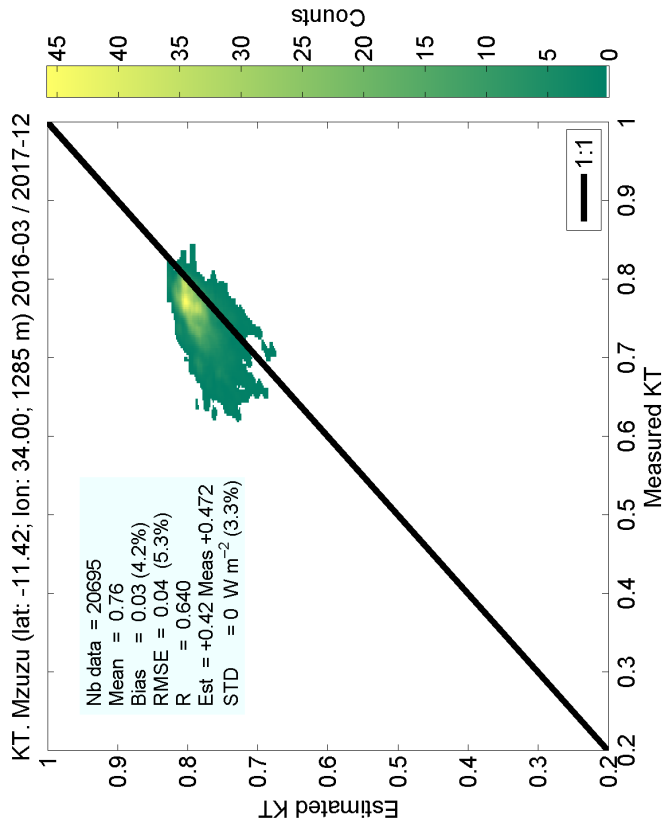

KT. Mzuzu (lat: -11.42; lon: 34.00; 1285 m) 2016-03 / 2017-12

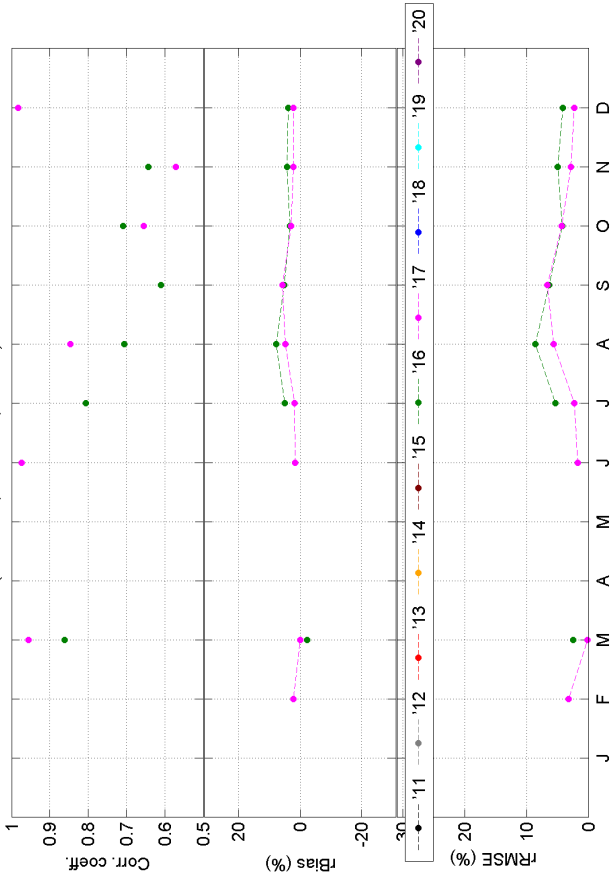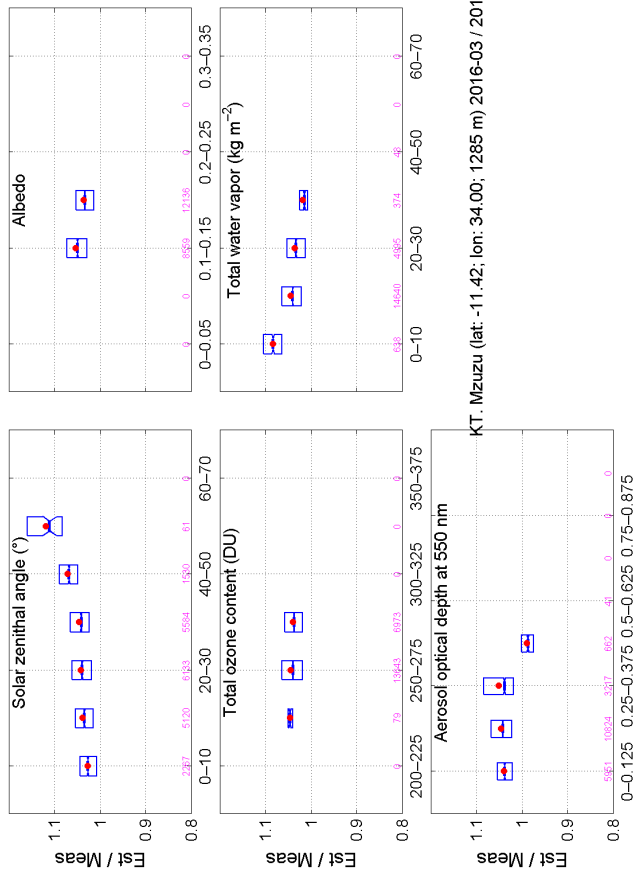

KT. Mzuzu (lat: -11.42; lon: 34.00; 1285 m) 2016-03 / 2017-12

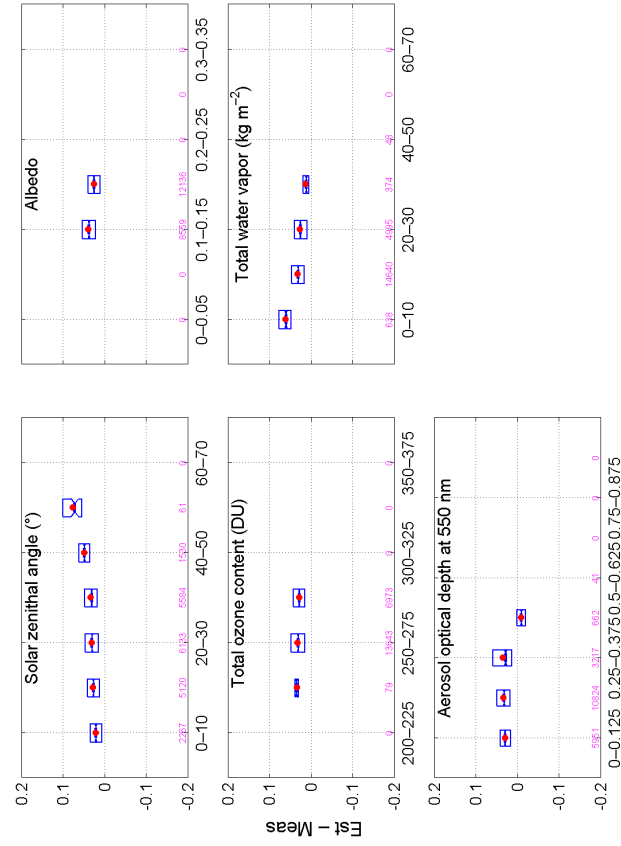

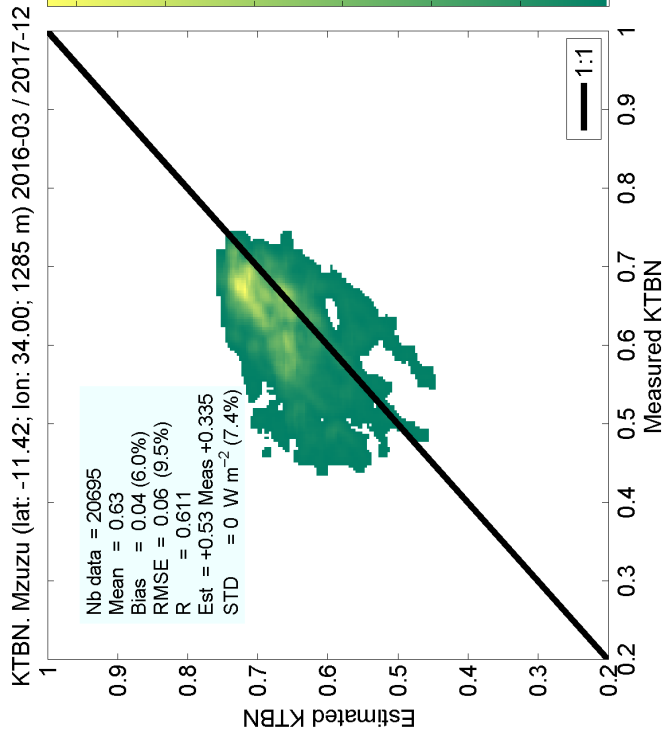

KTBN, Mzuzu (lat: -11.42; lon: 34.00; 1285 m) 2016-03 / 2017-12

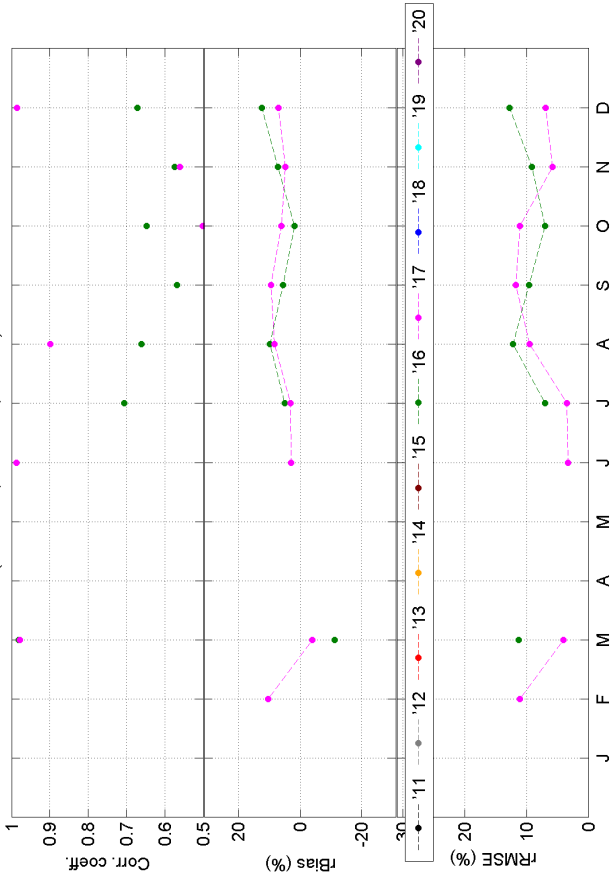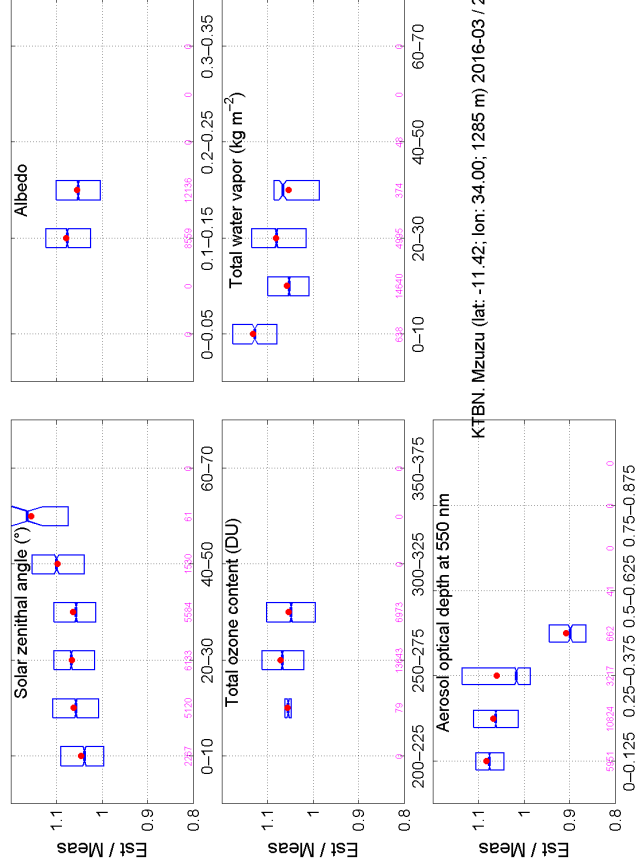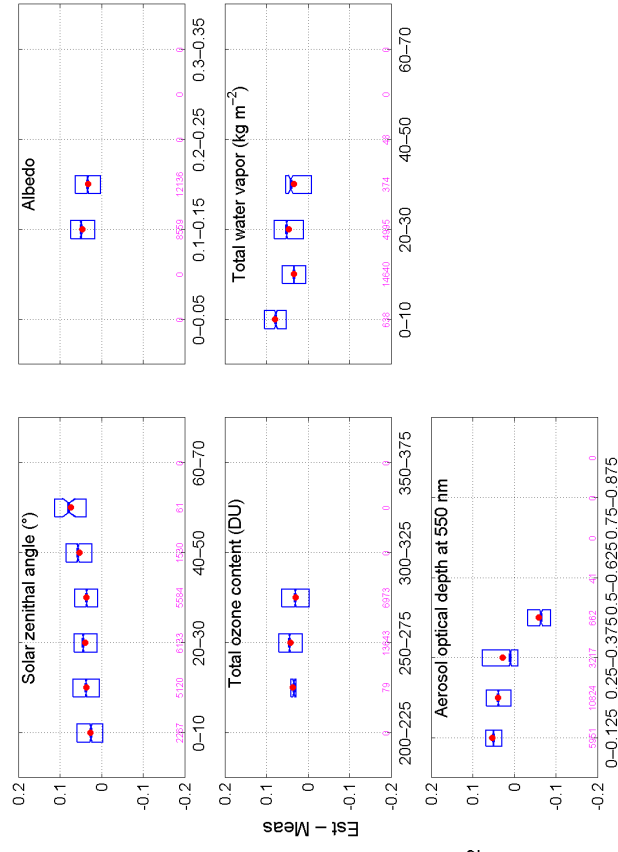

Figure S60: Comparison on direct clearness index at Mzuzu

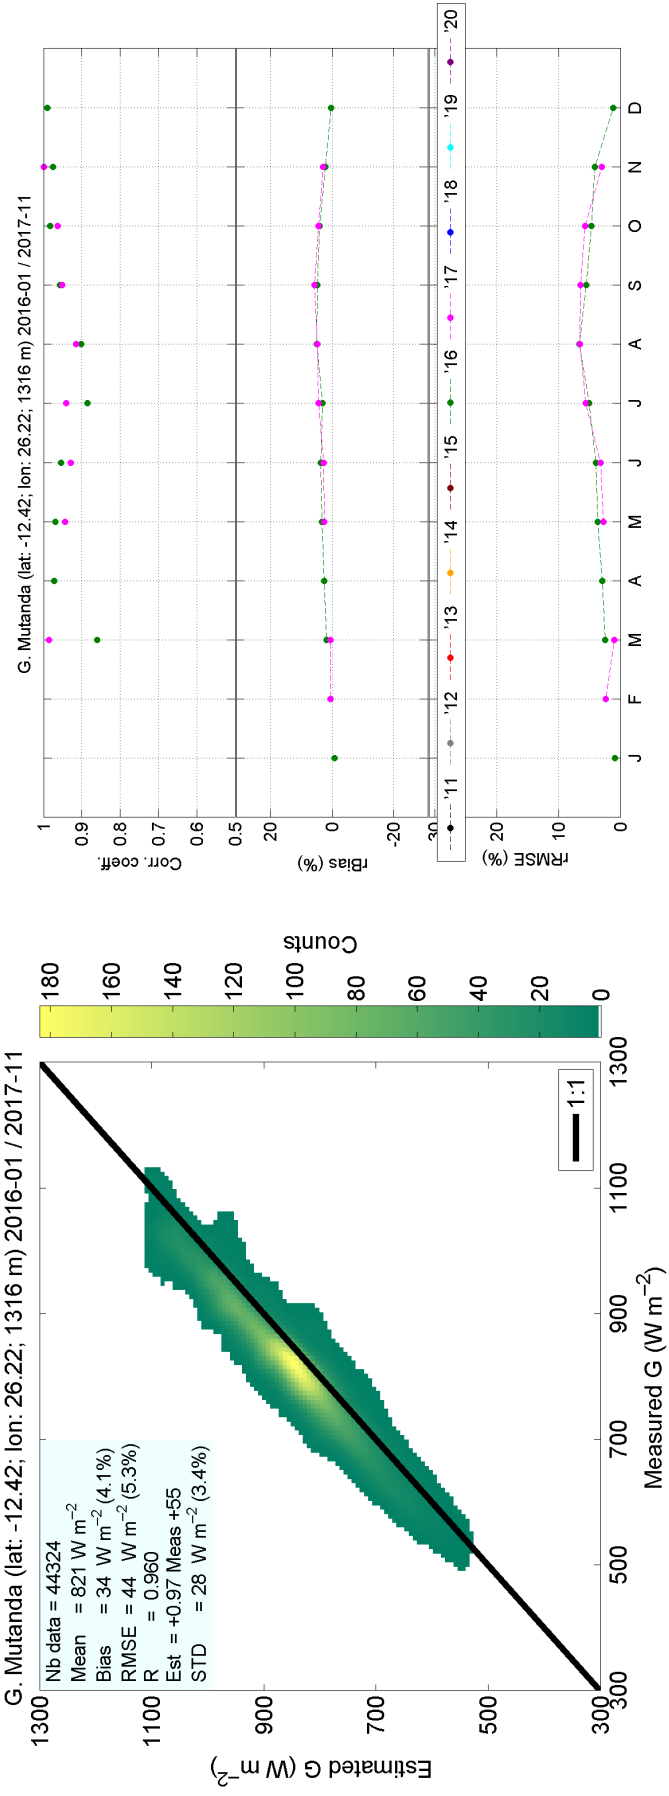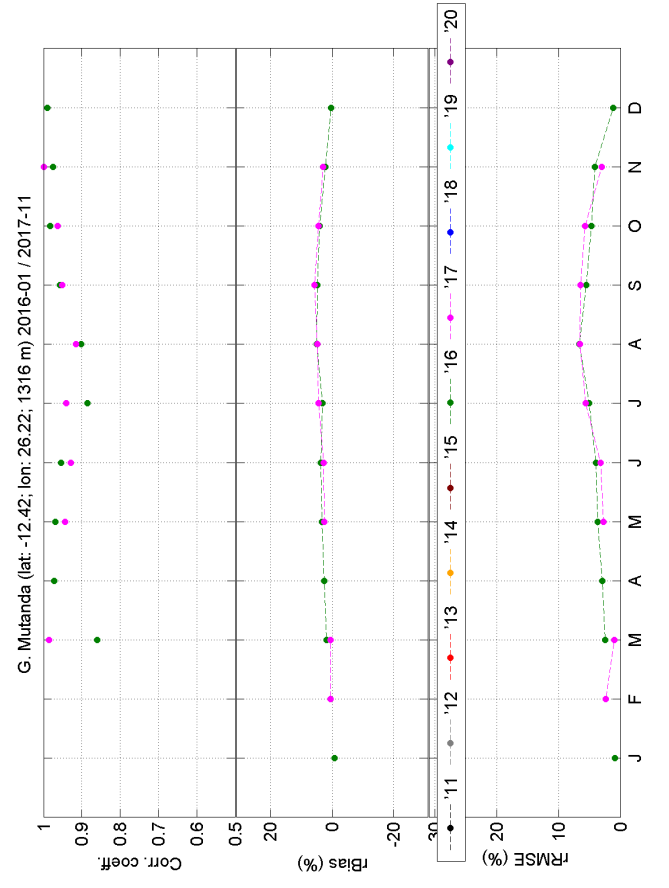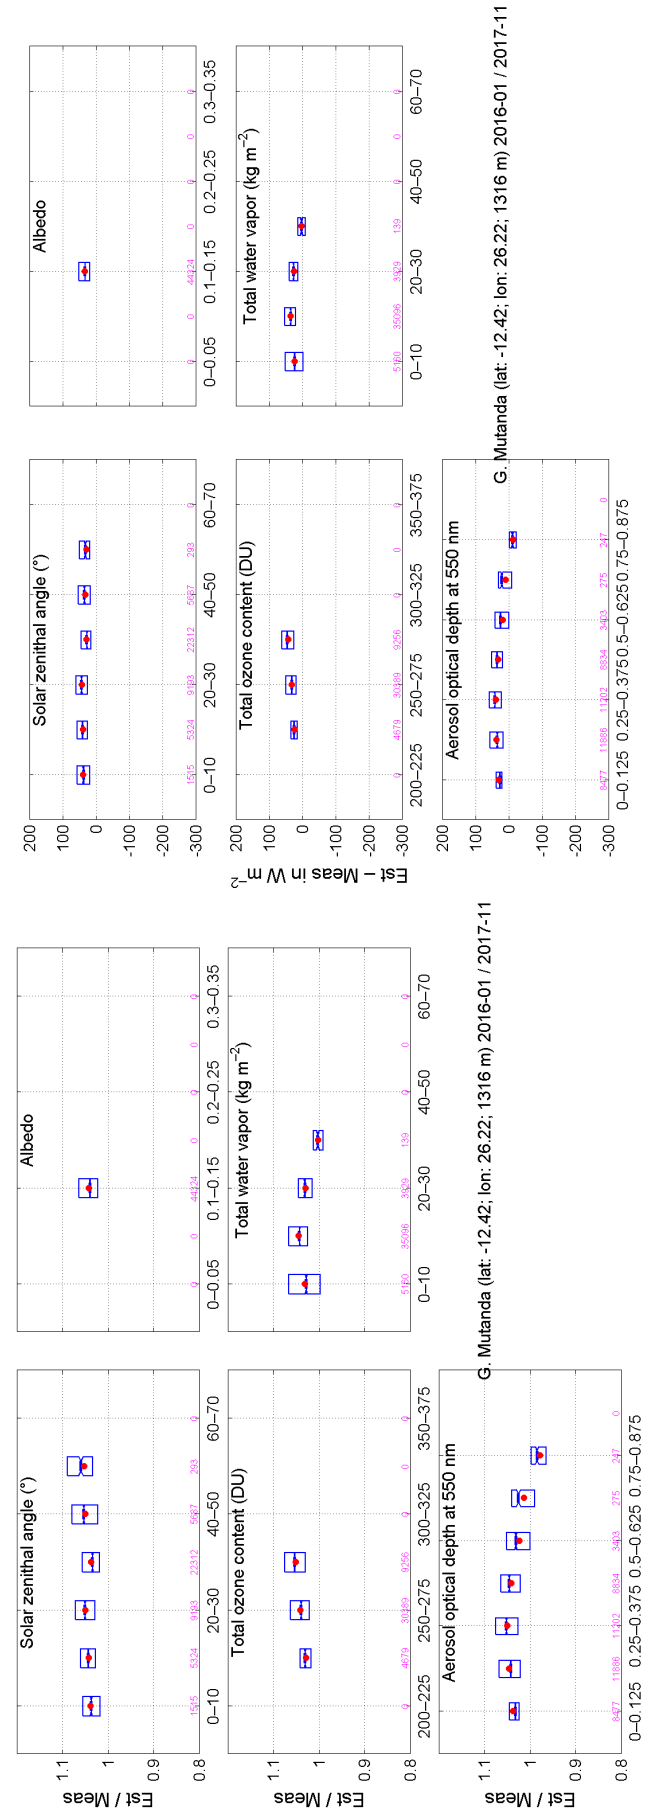

Figure S61: Comparison on global irradiance at Mutanda

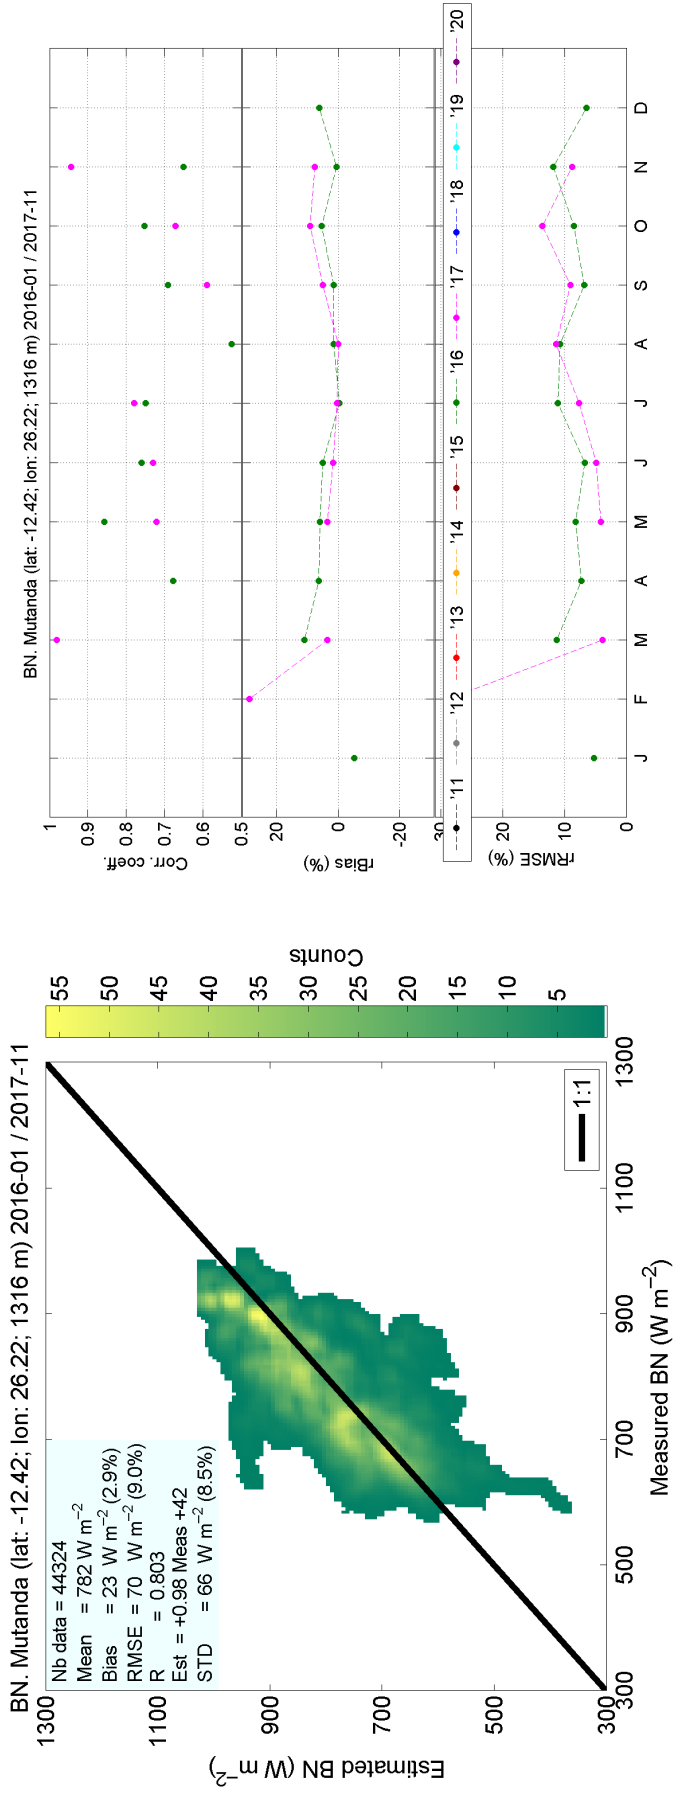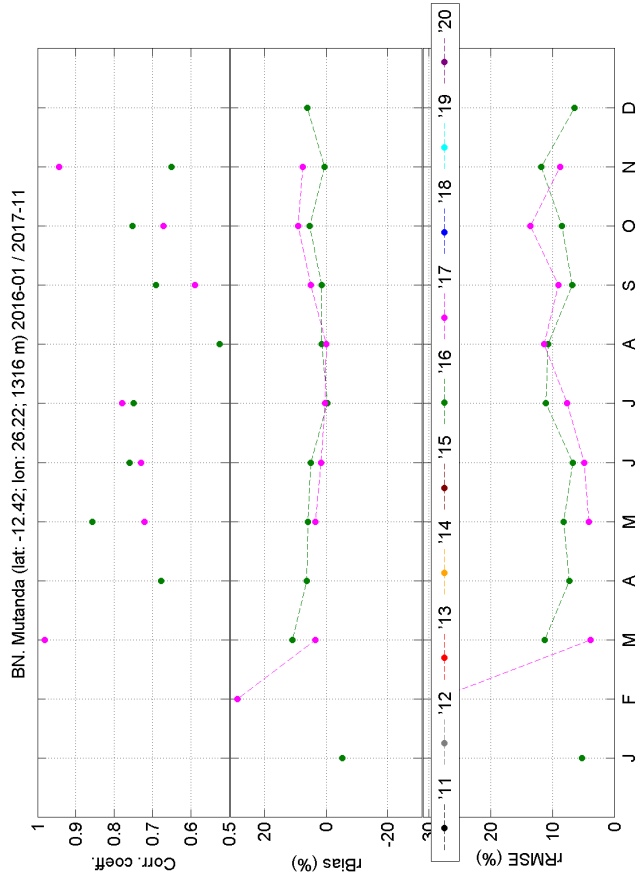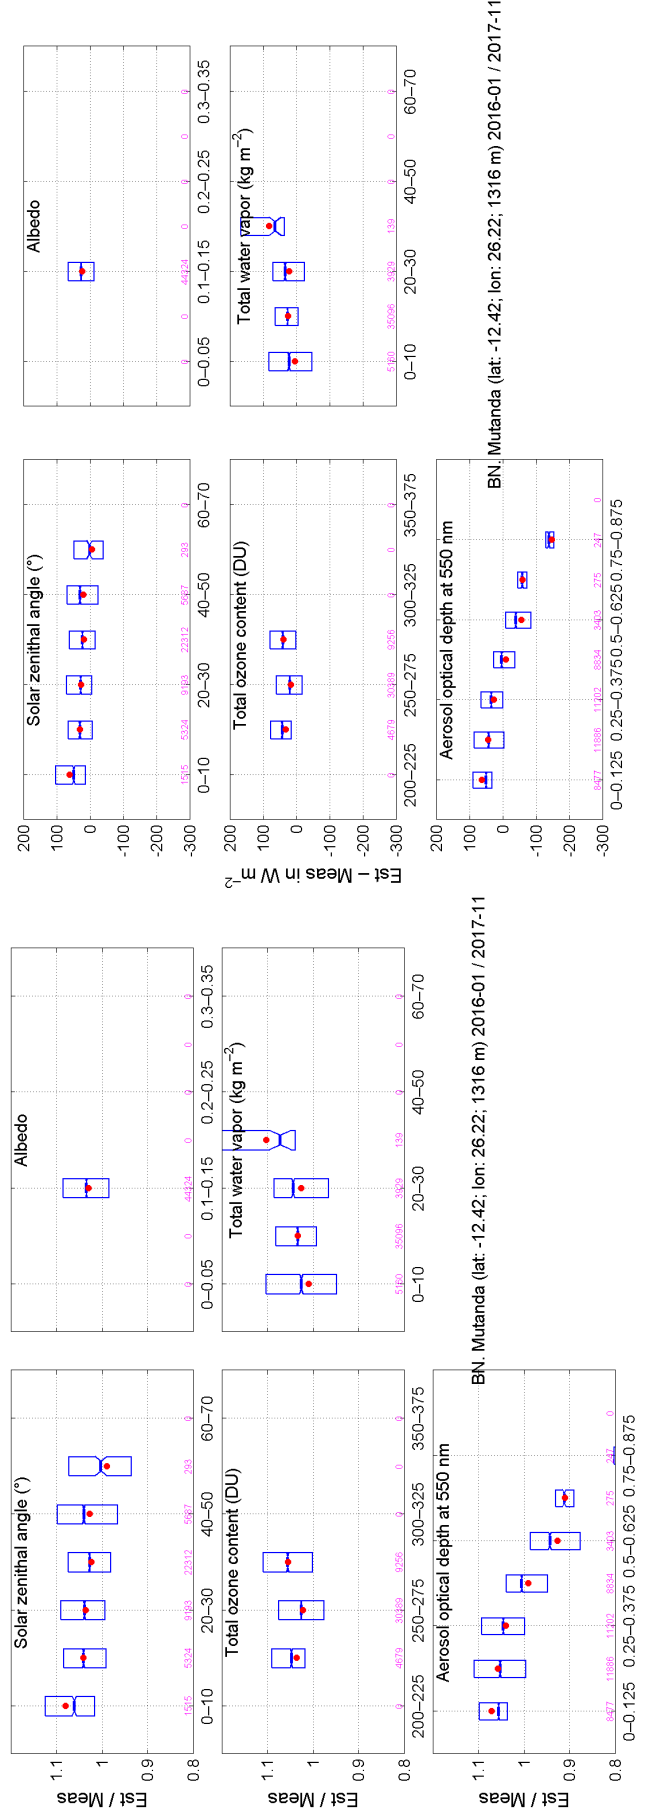

Figure S62: Comparison on direct component at normal irradiance at Mutanda



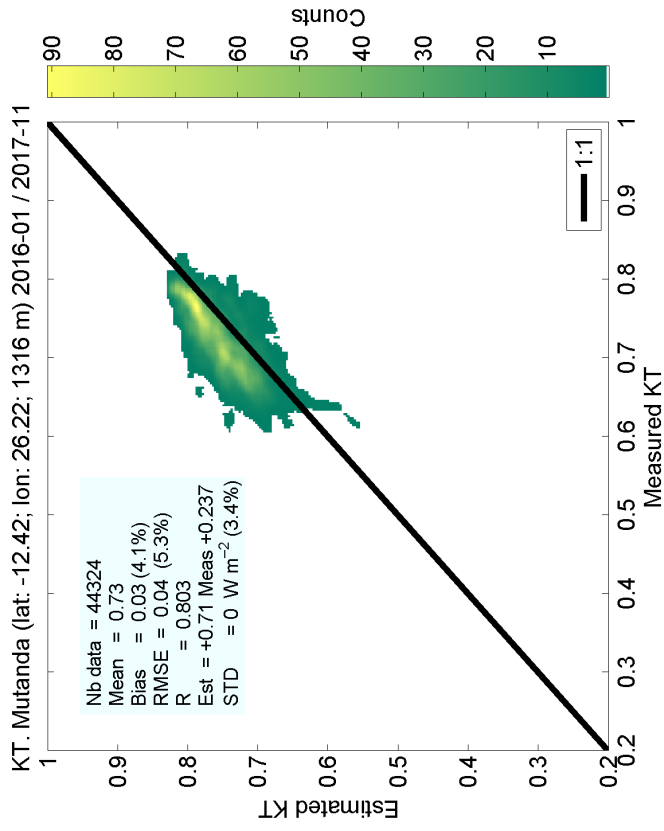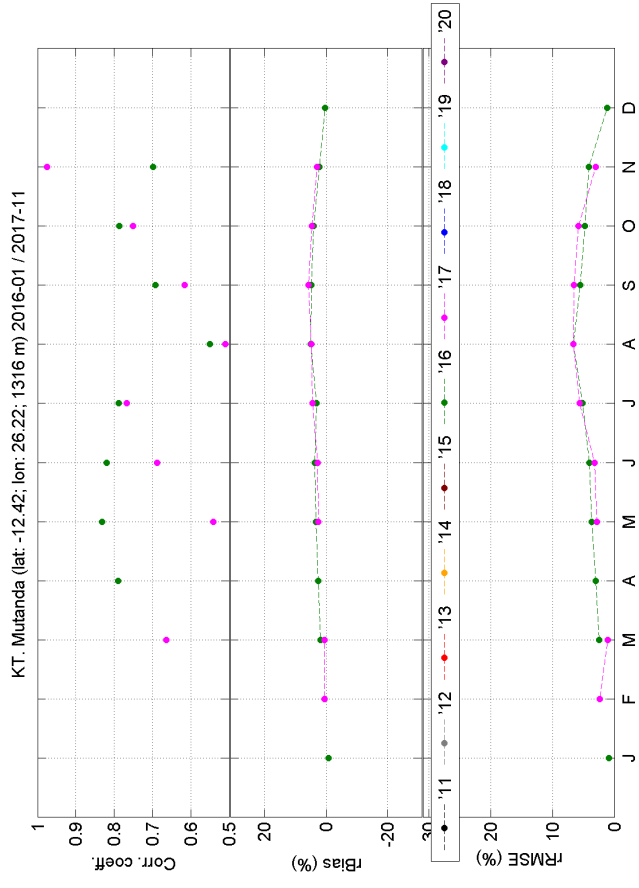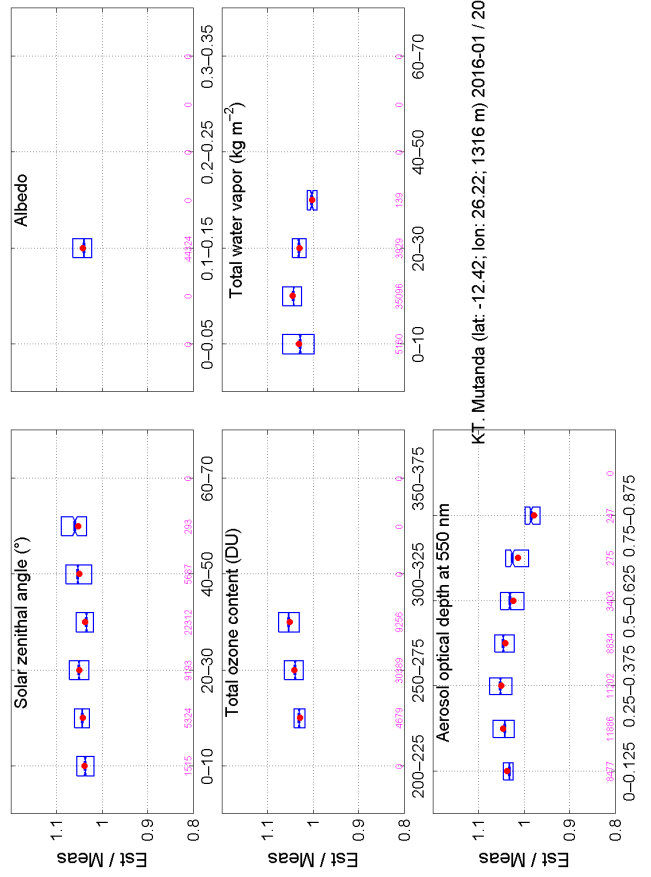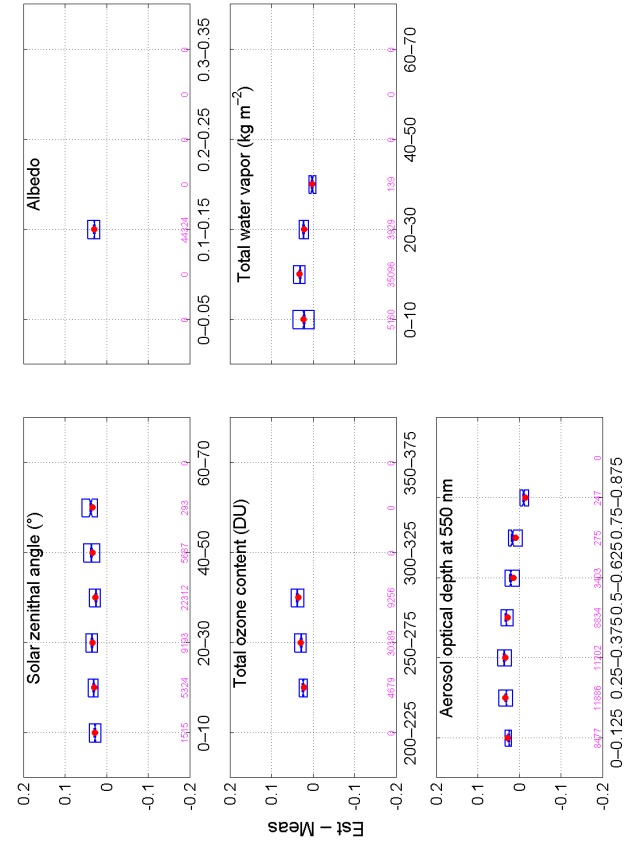

Figure S63: Comparison on clearness index at Mutanda

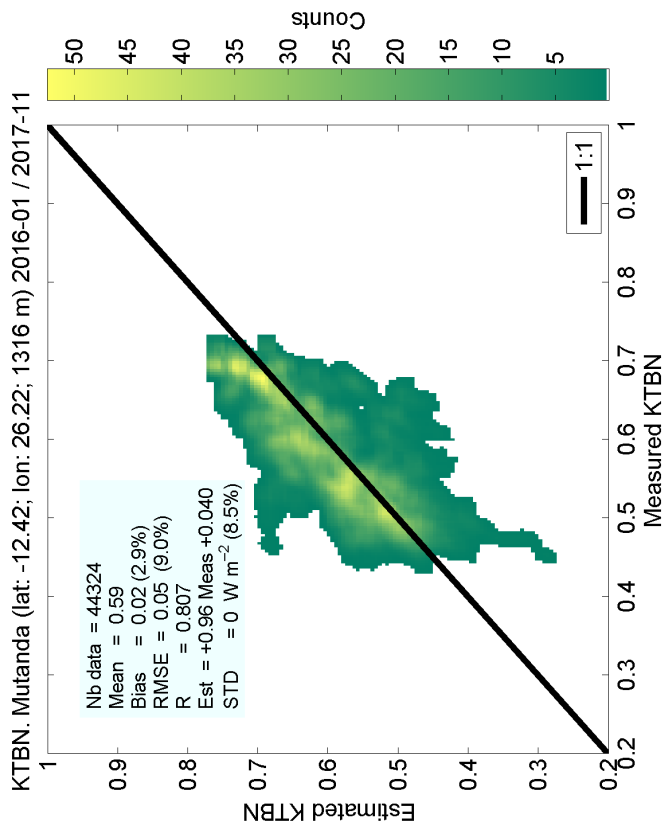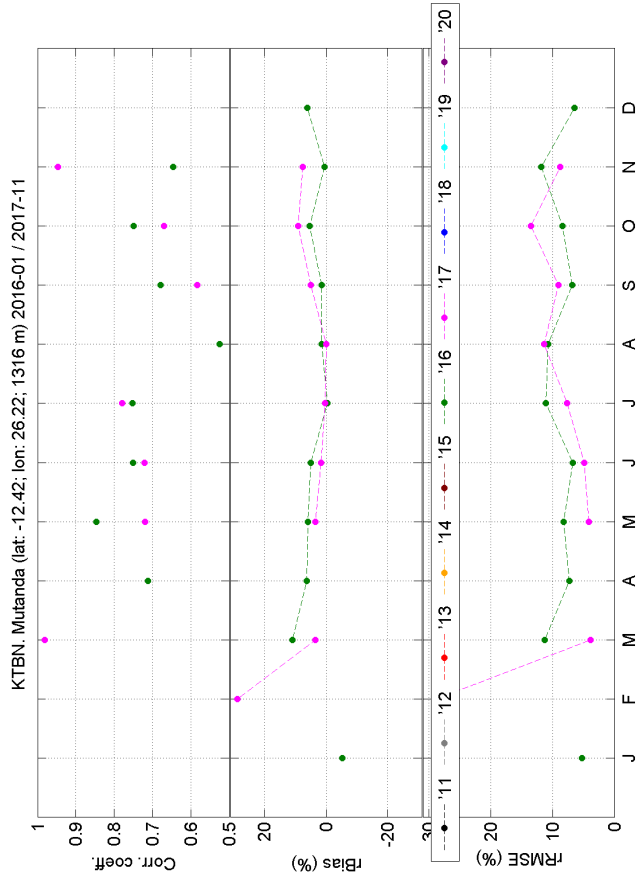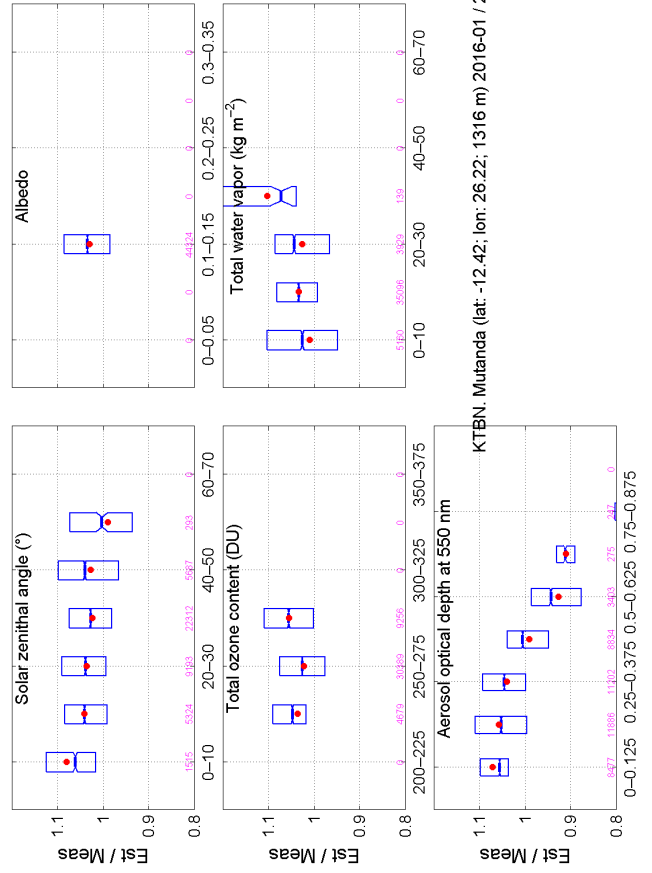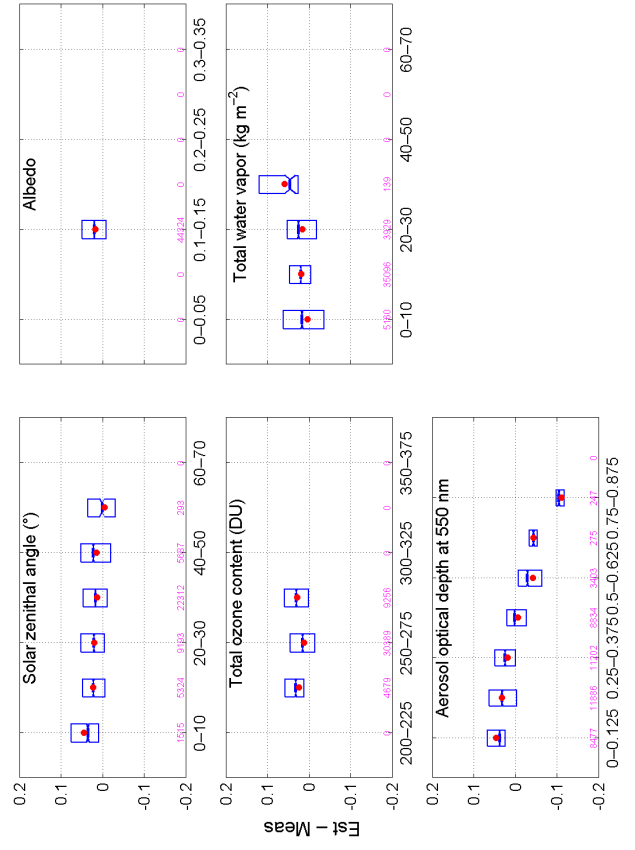

Figure S64: Comparison on direct clearness index at Mutanda

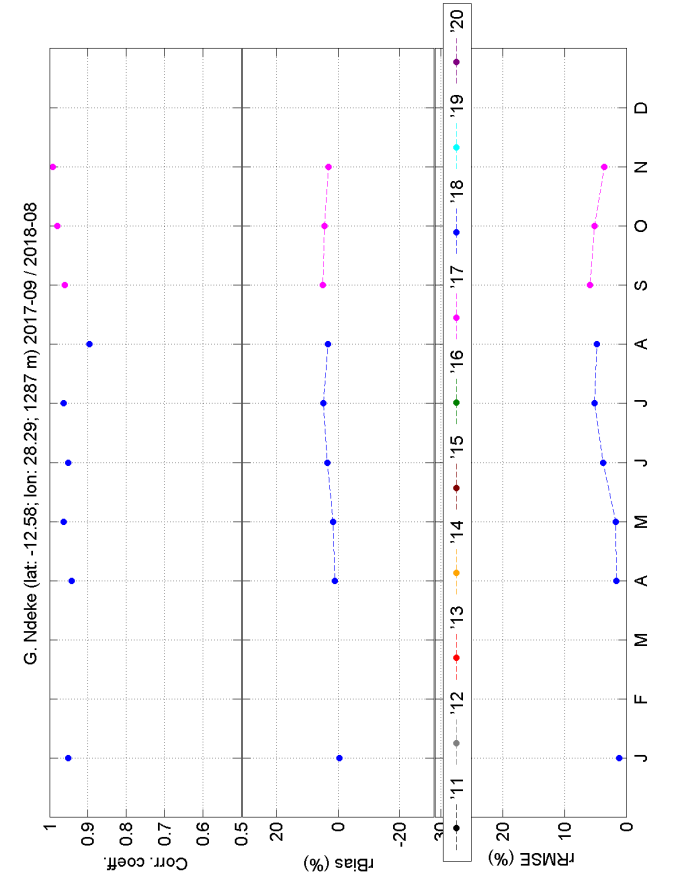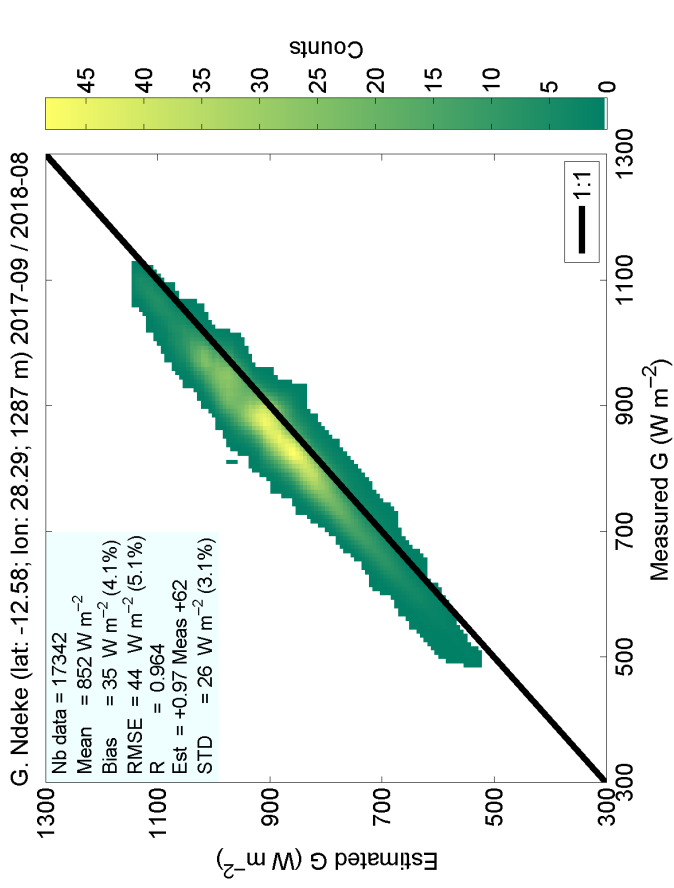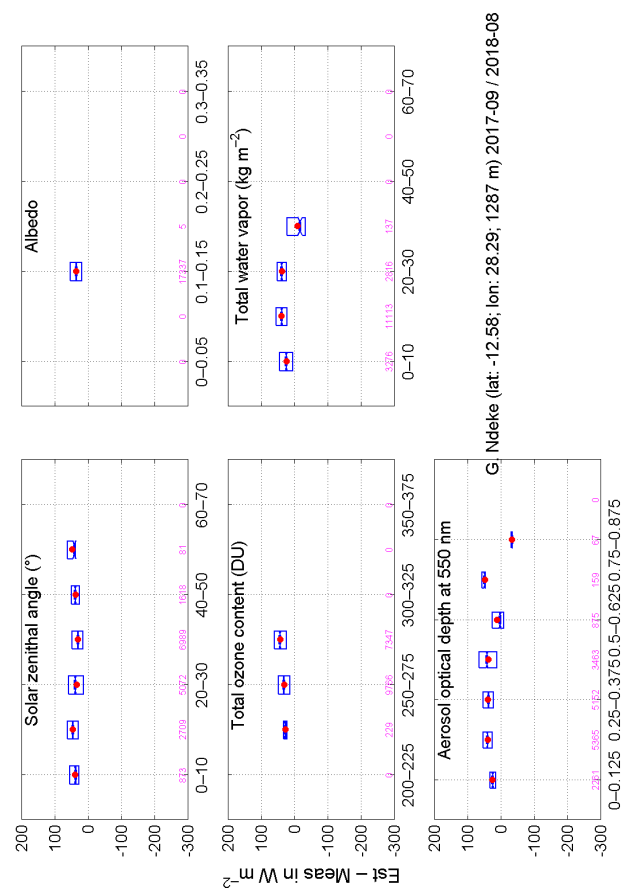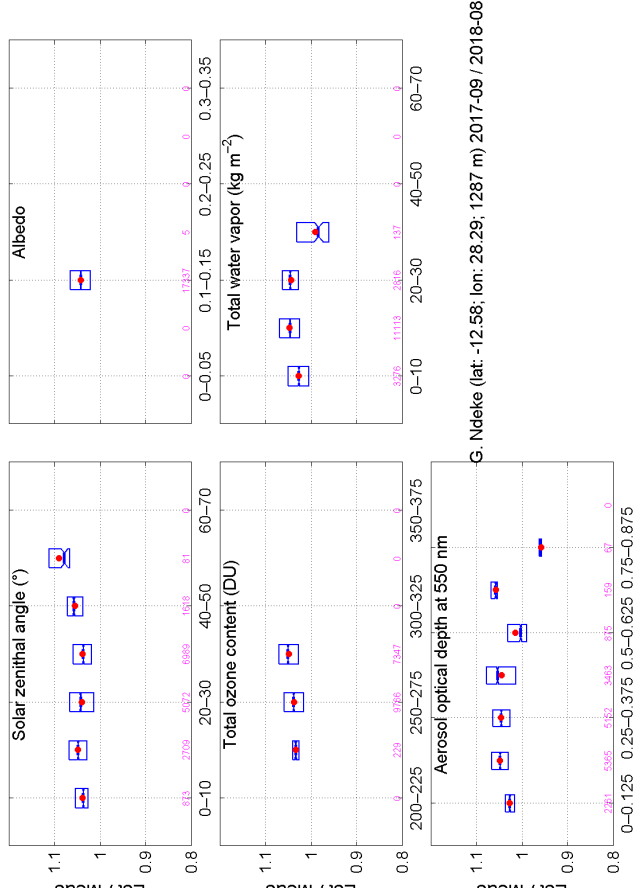

Figure S65: Comparison of global irradiance at Ndeke

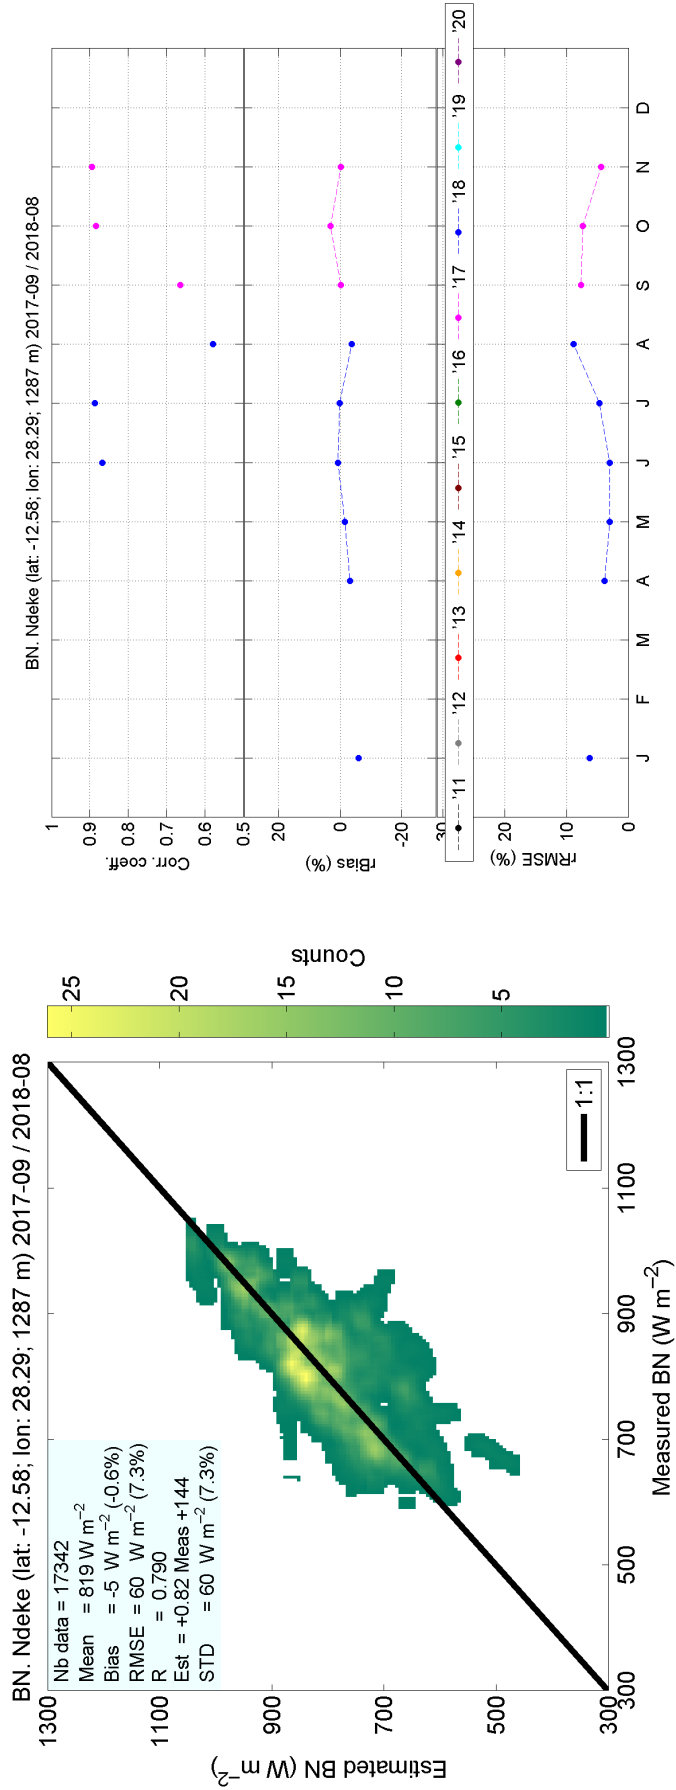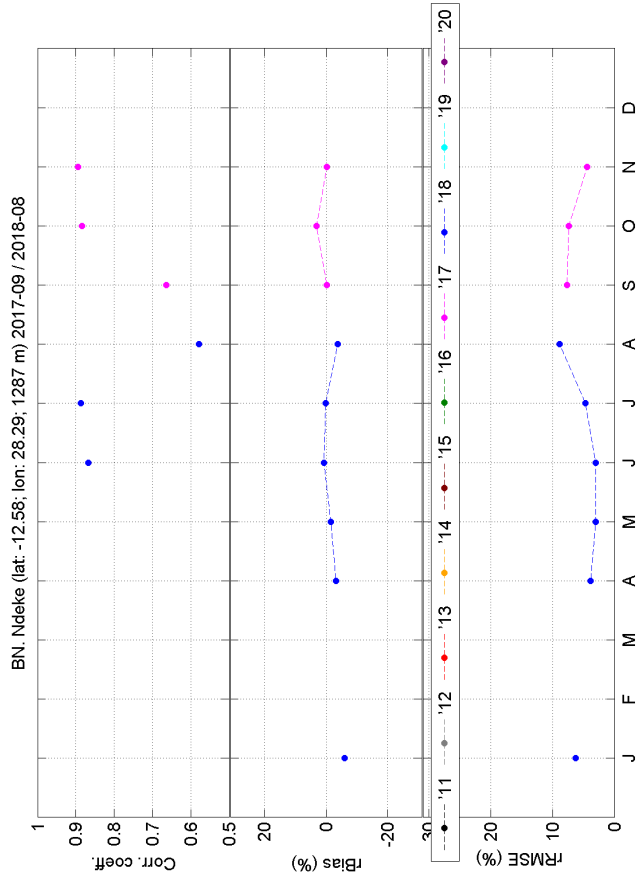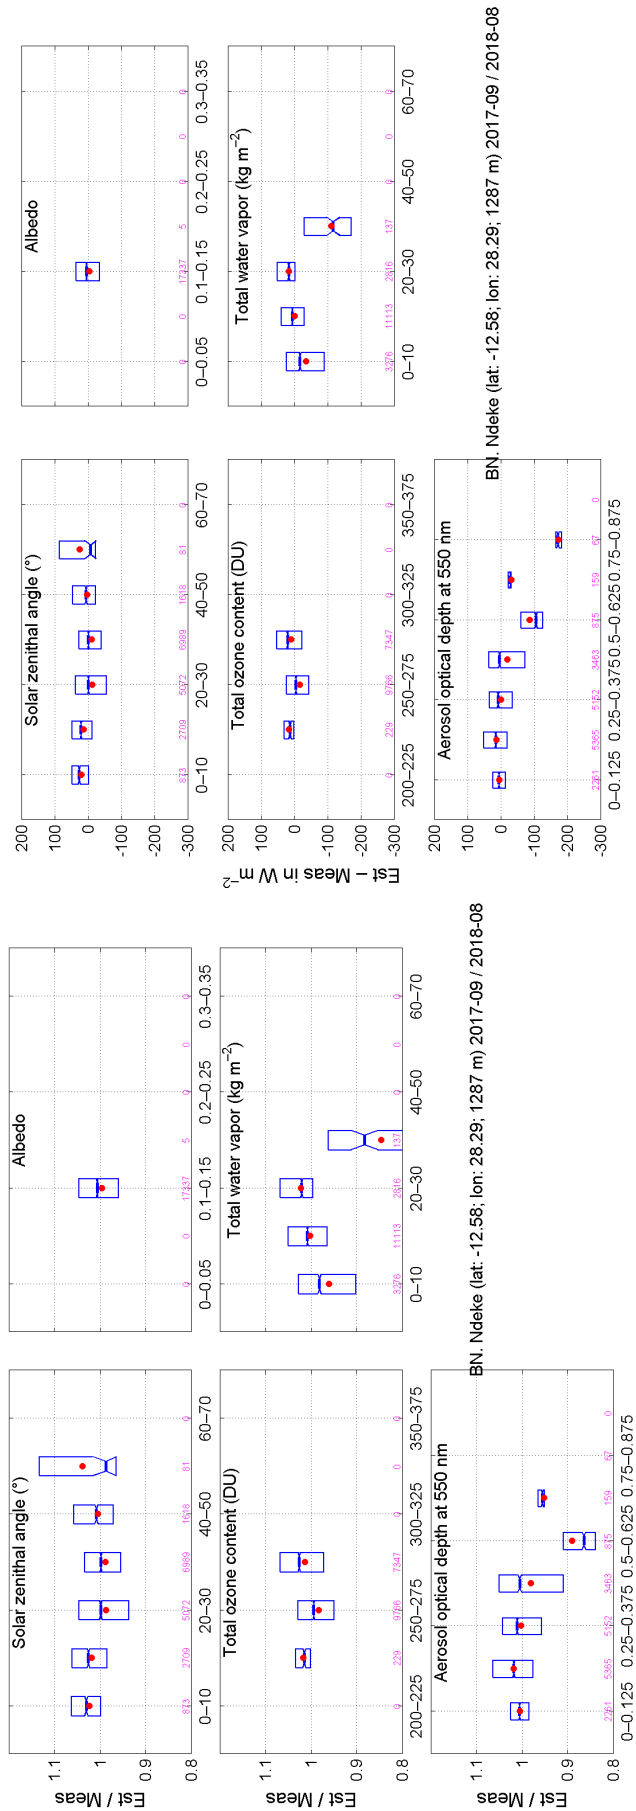

Figure S66: Comparison on direct component at normal irradiance at Ndeke

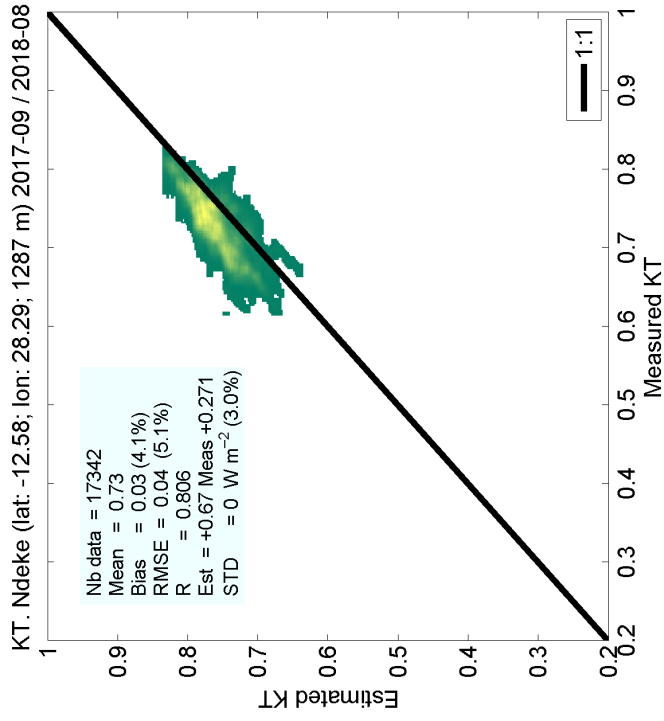

KT. Ndeke (lat: -12.58; lon: 28.29; 1287 m) 2017-09 / 2018-08

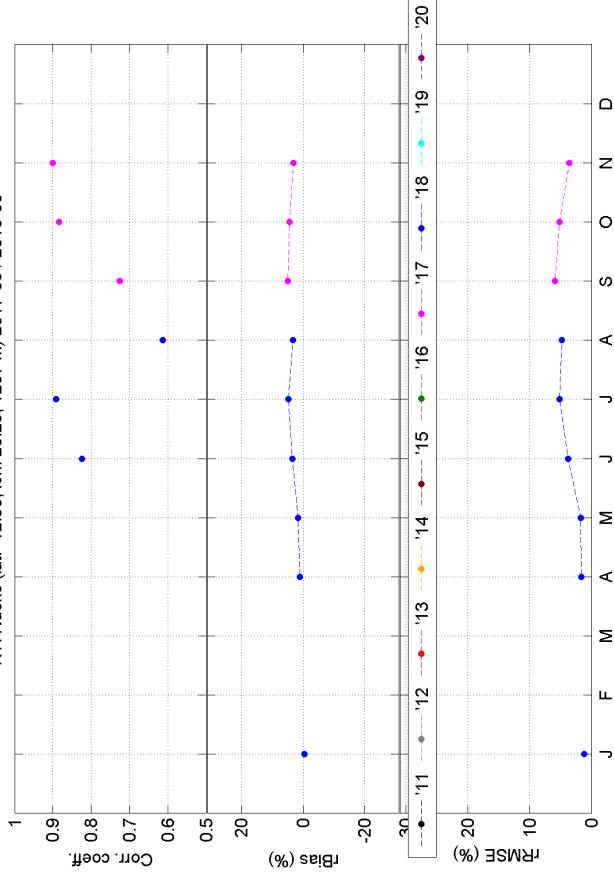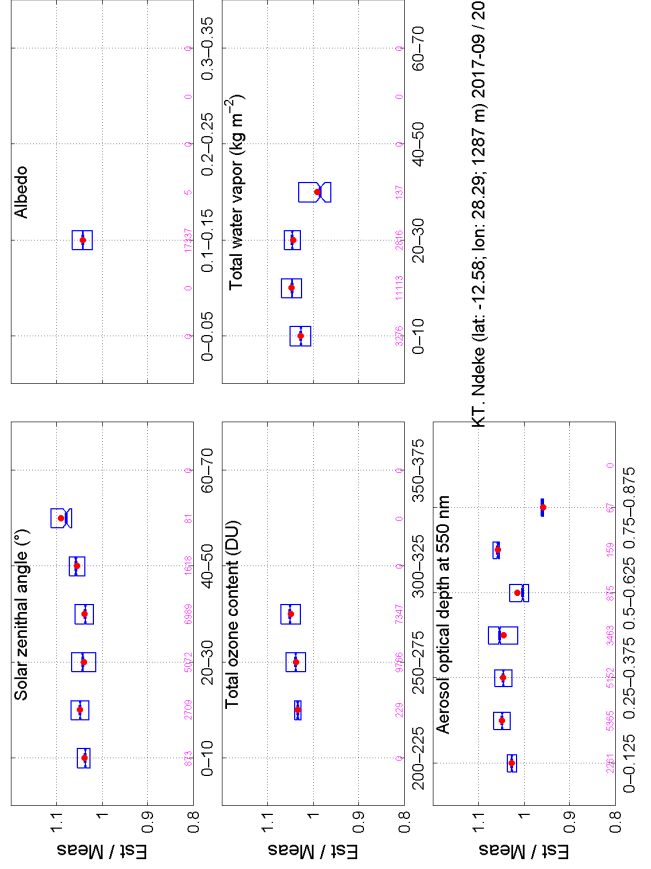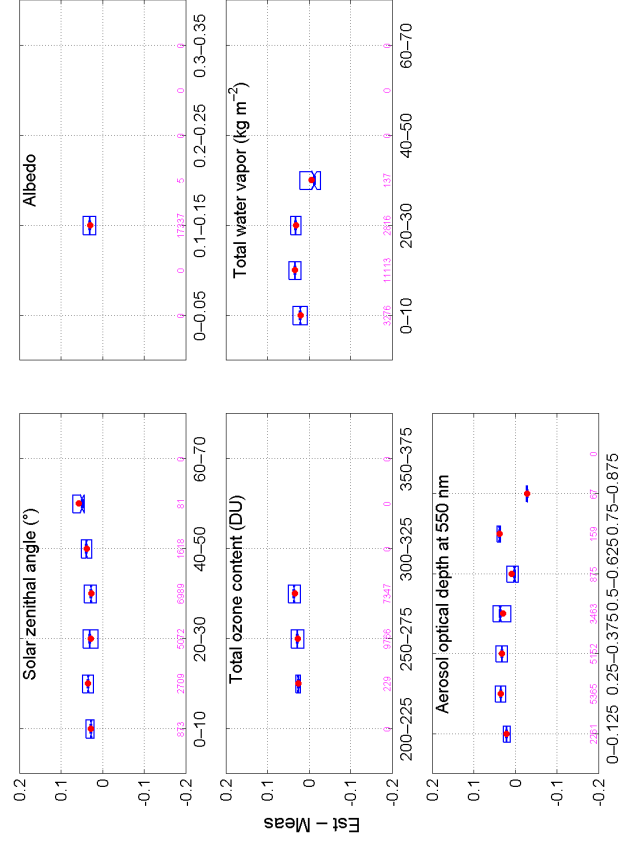

Figure S67: Comparison on clearness index at Ndeke

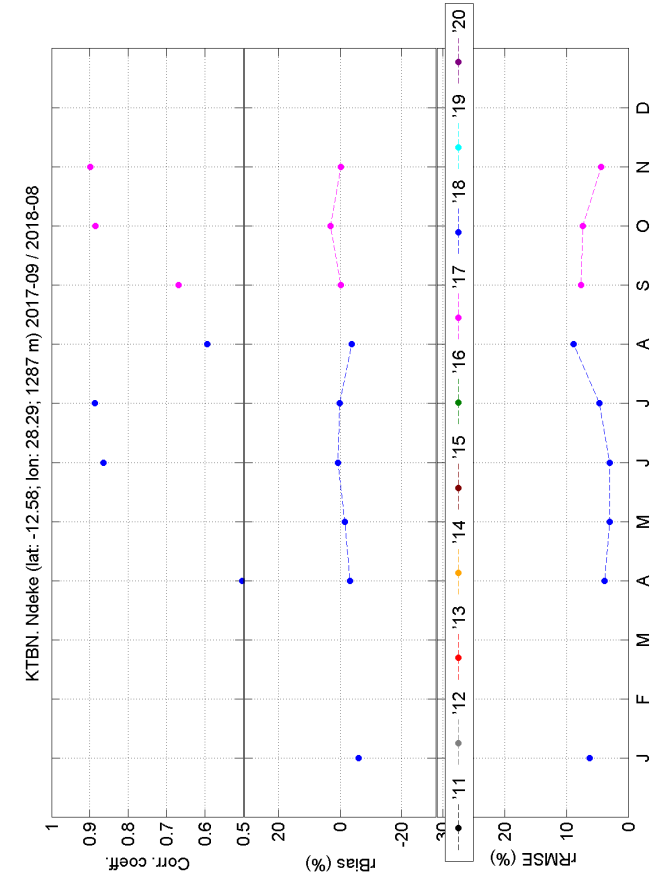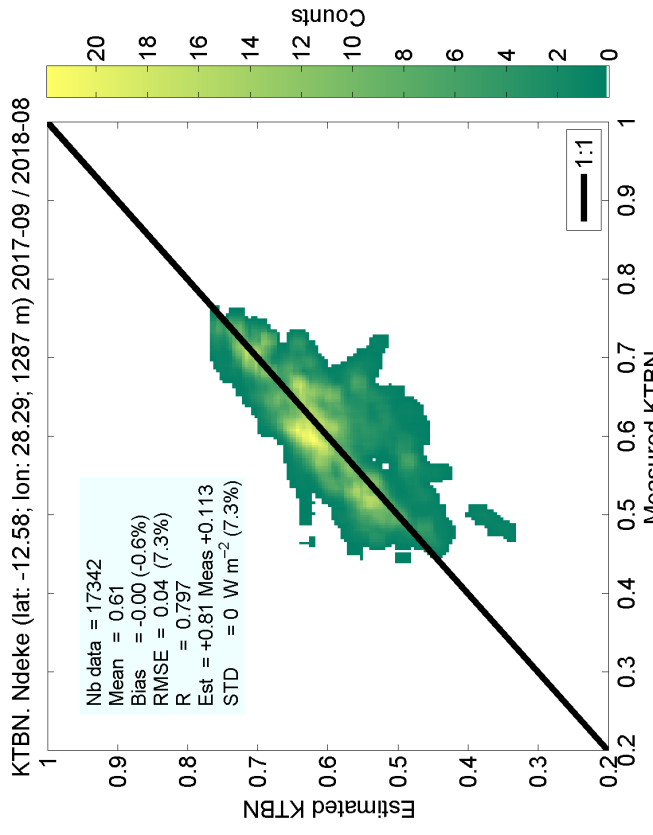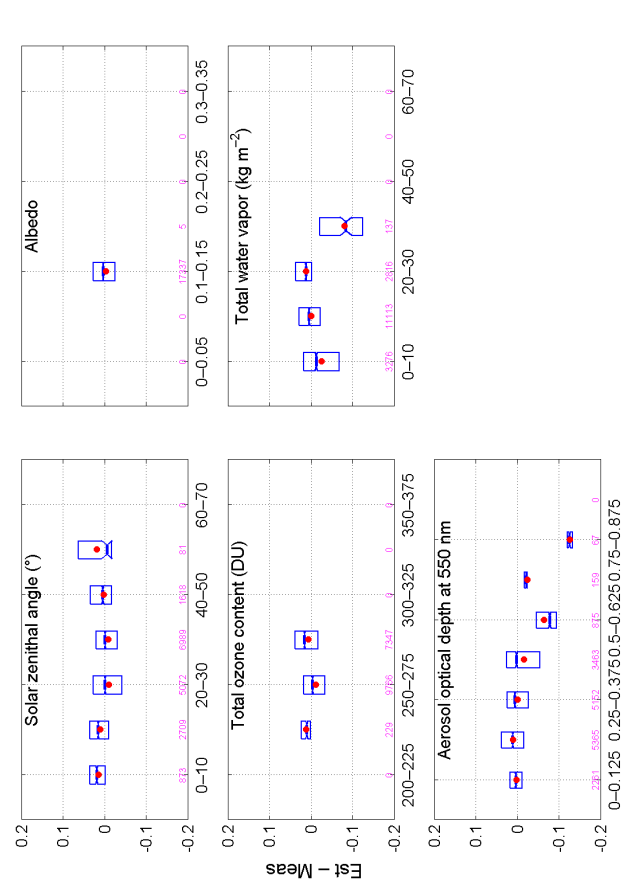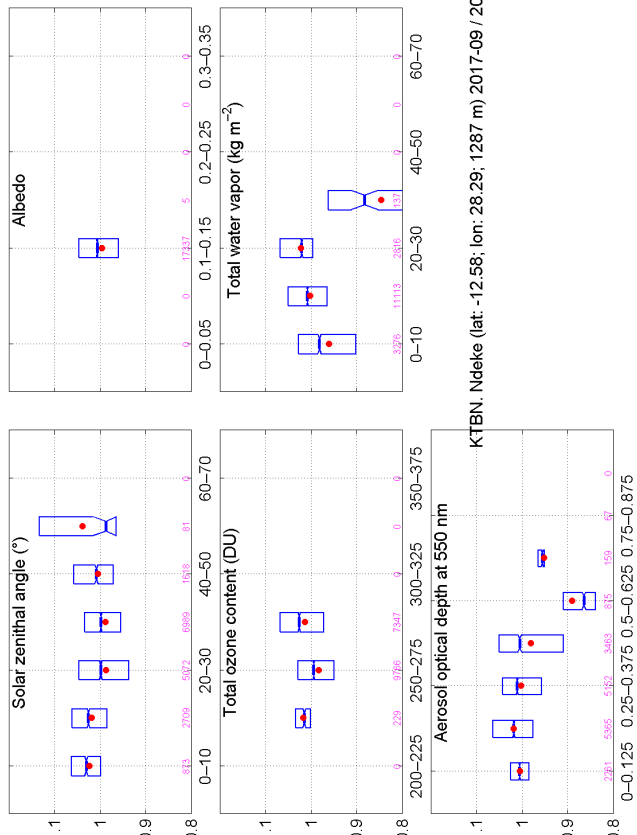

KTBN, Ndeke (lat: -12.58; lon: 28.29; 1287 m) 2017-09 / 2018-08

Figure S68: Comparison on direct clearness index at Ndeke

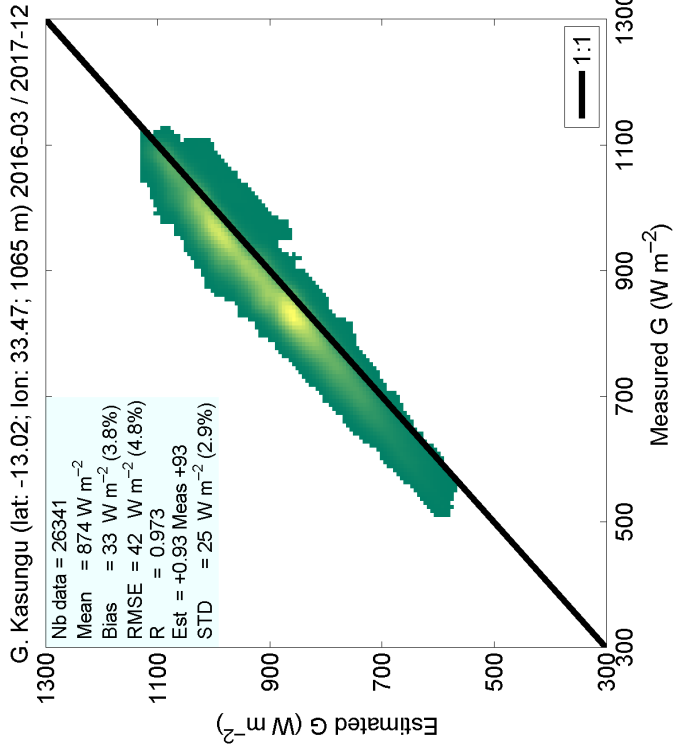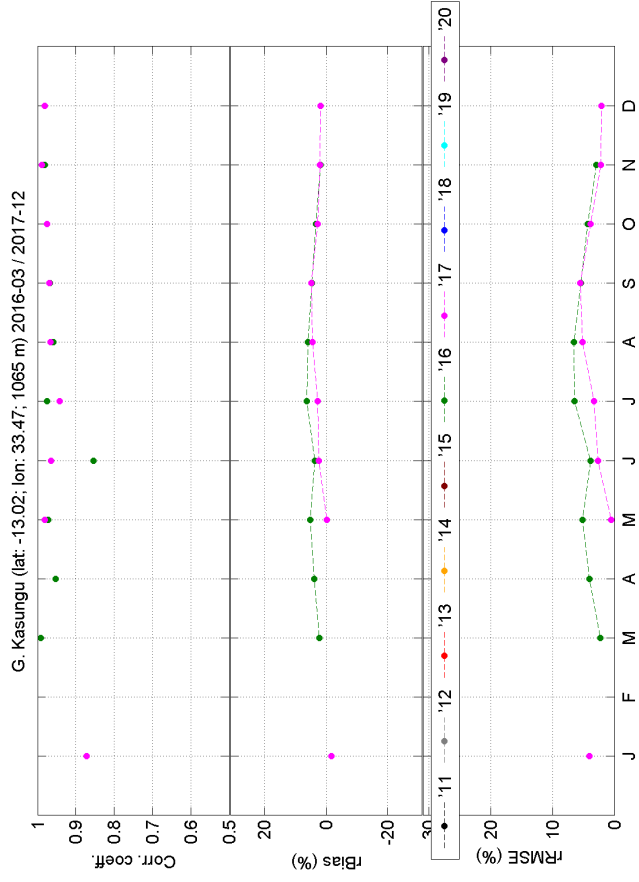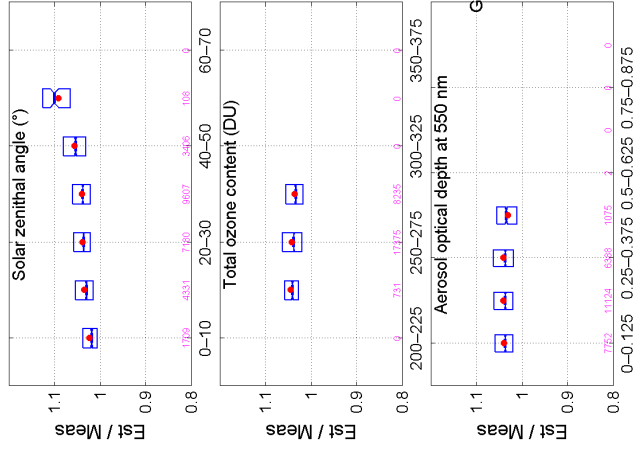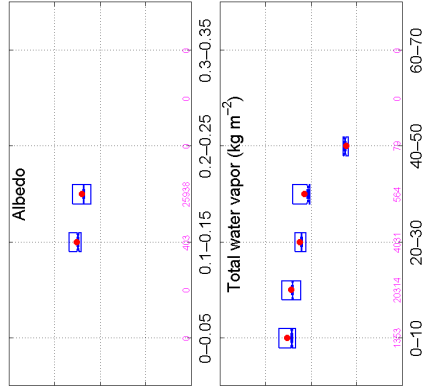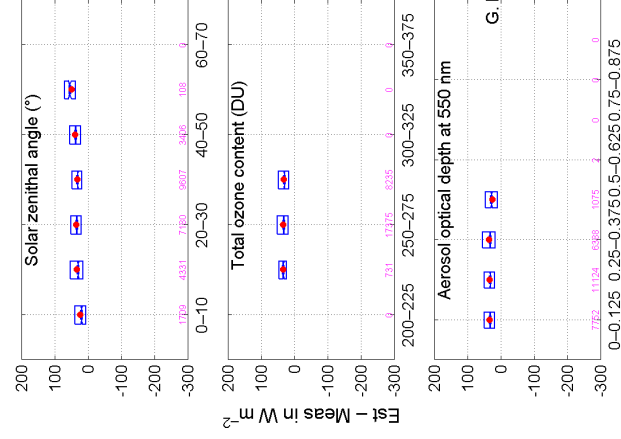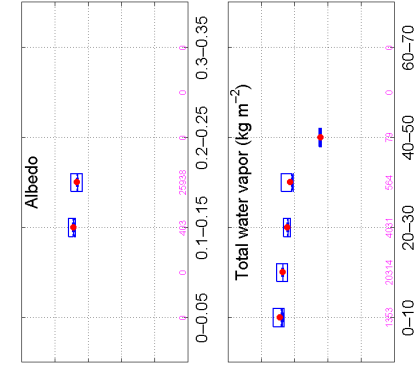

Figure S69: Comparison on global irradiance at Kasungu

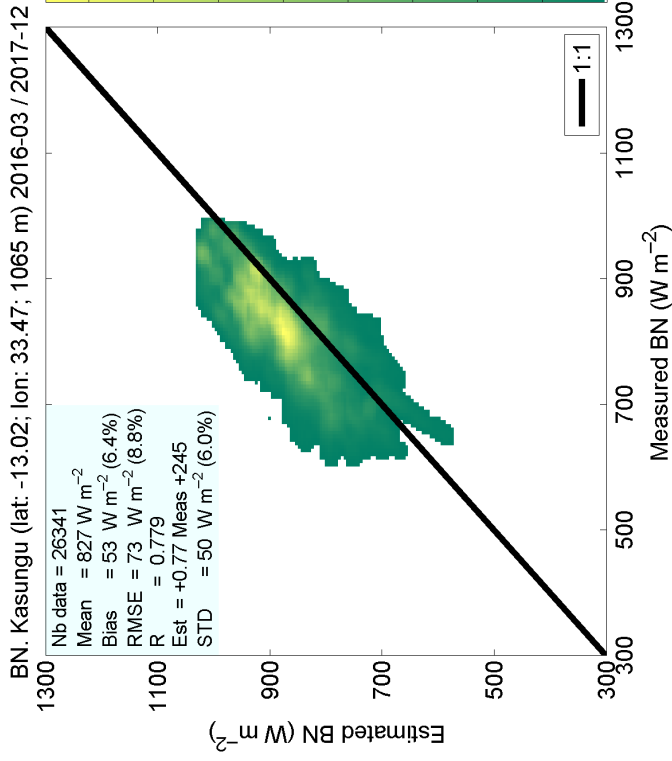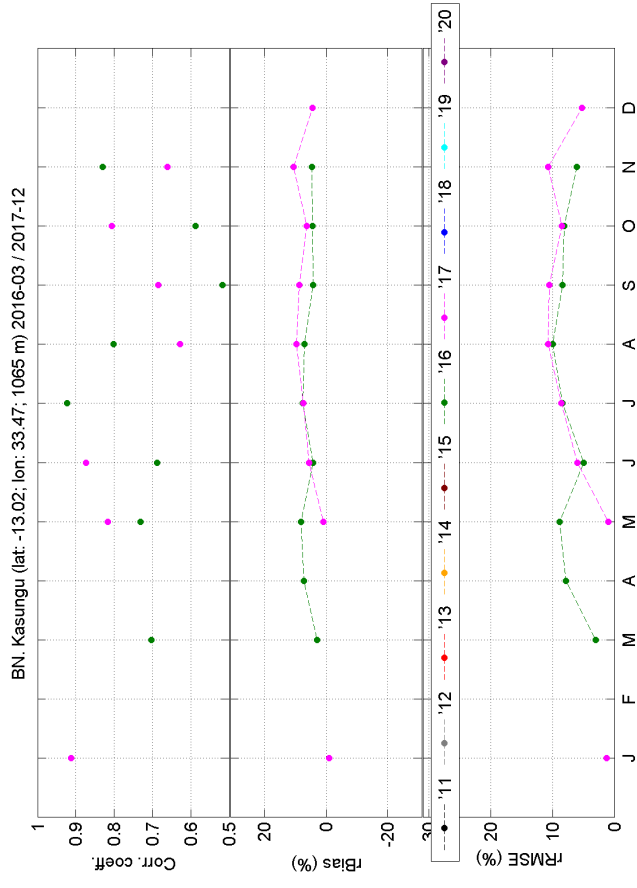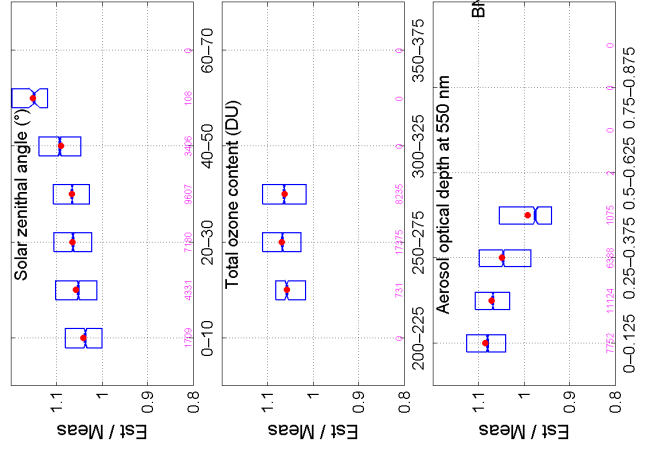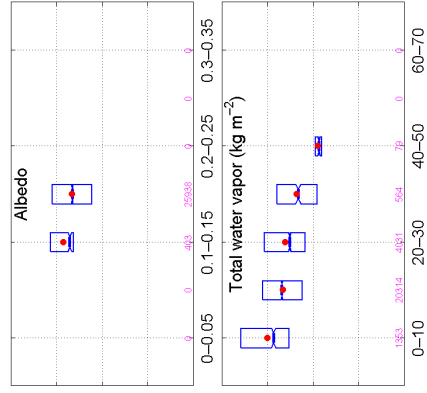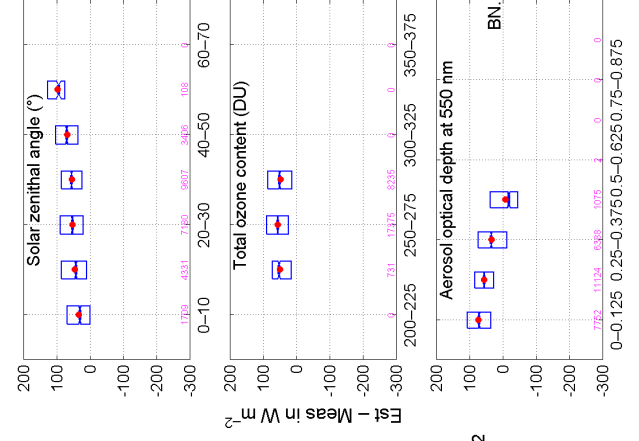

Figure S70: Comparison on direct component at normal irradiance at Kasungu



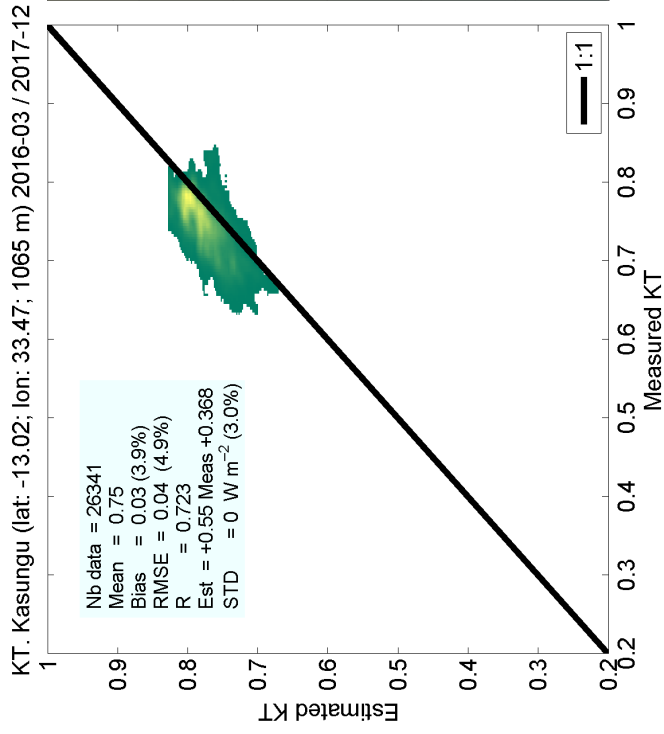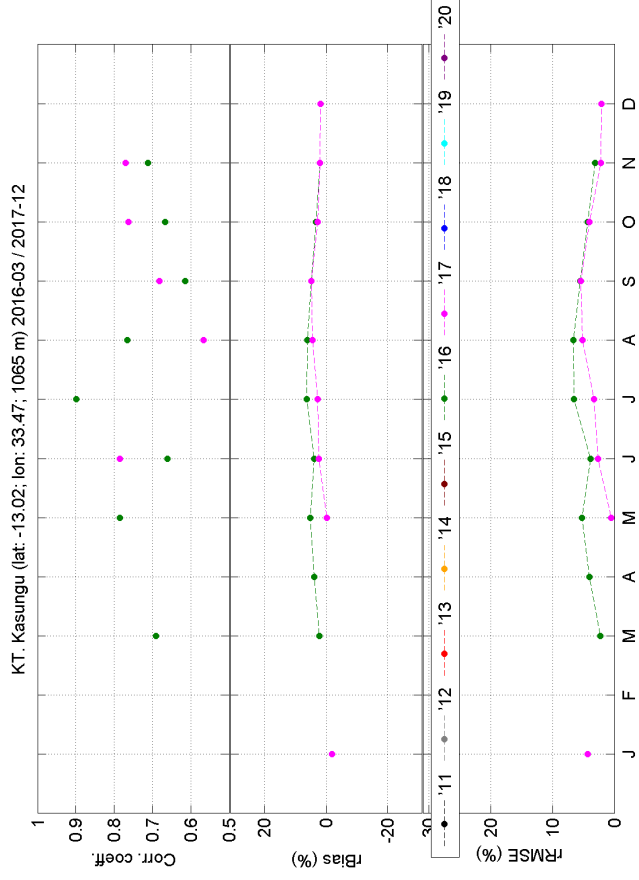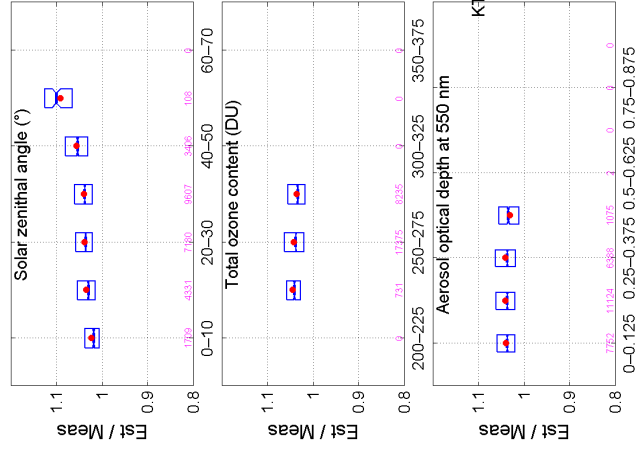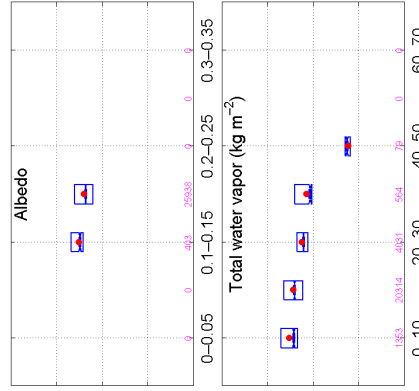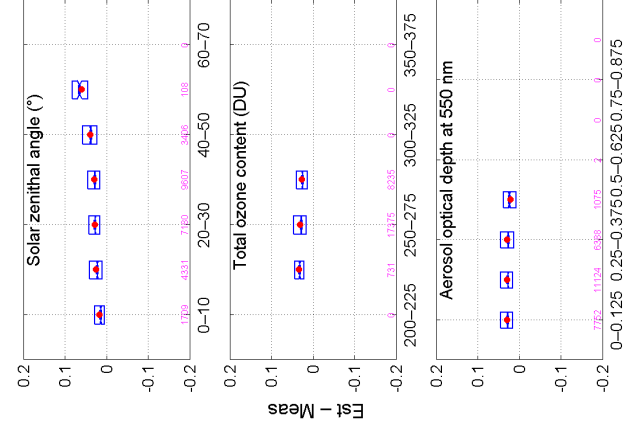

Figure S71: Comparison on clearness index at Kasungu

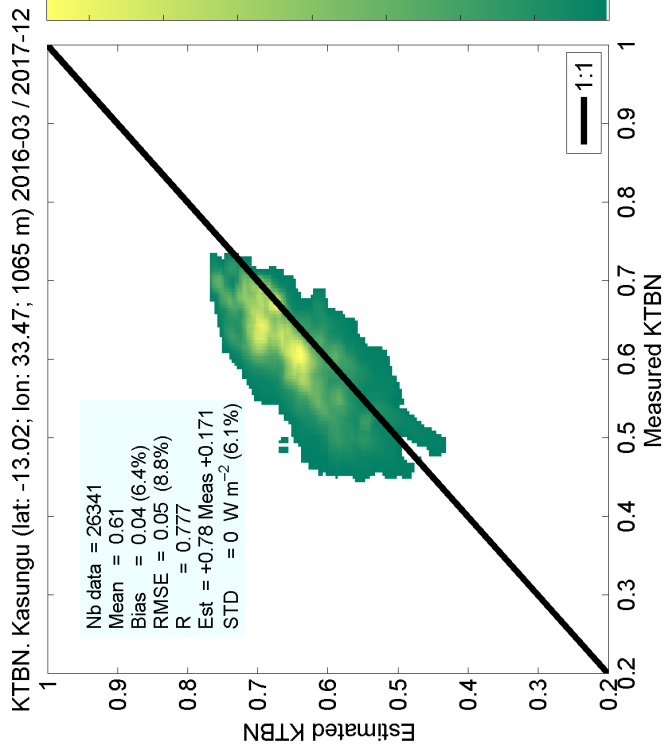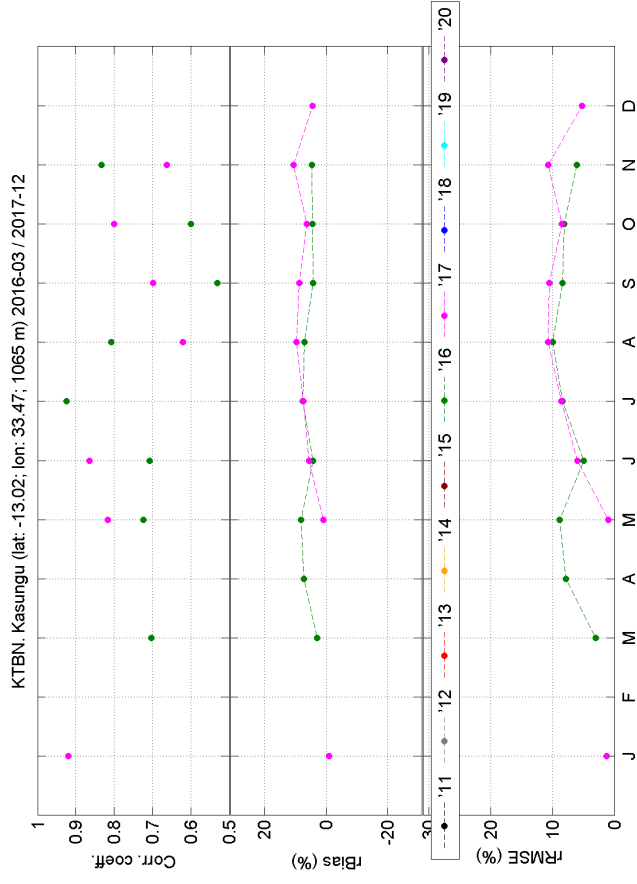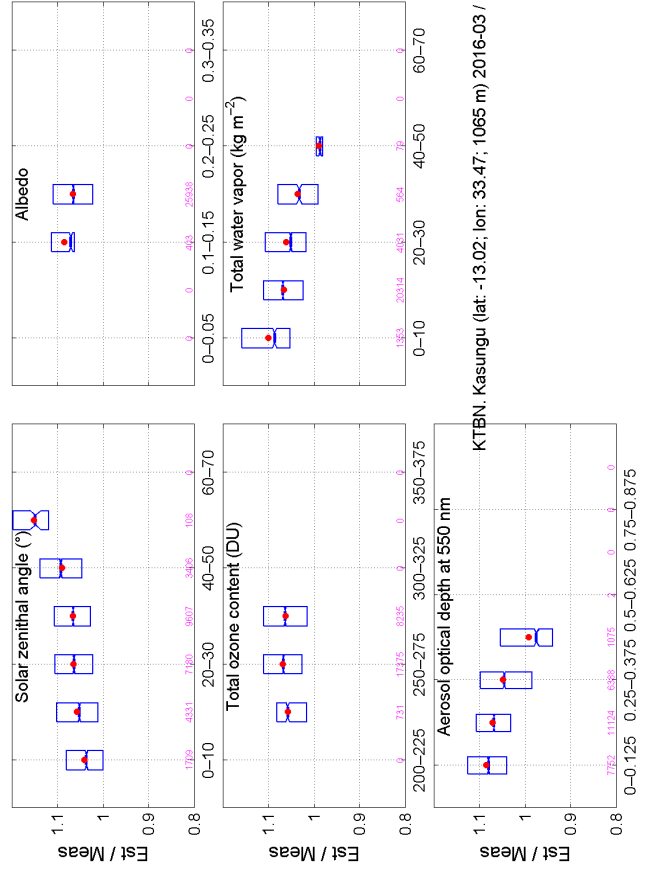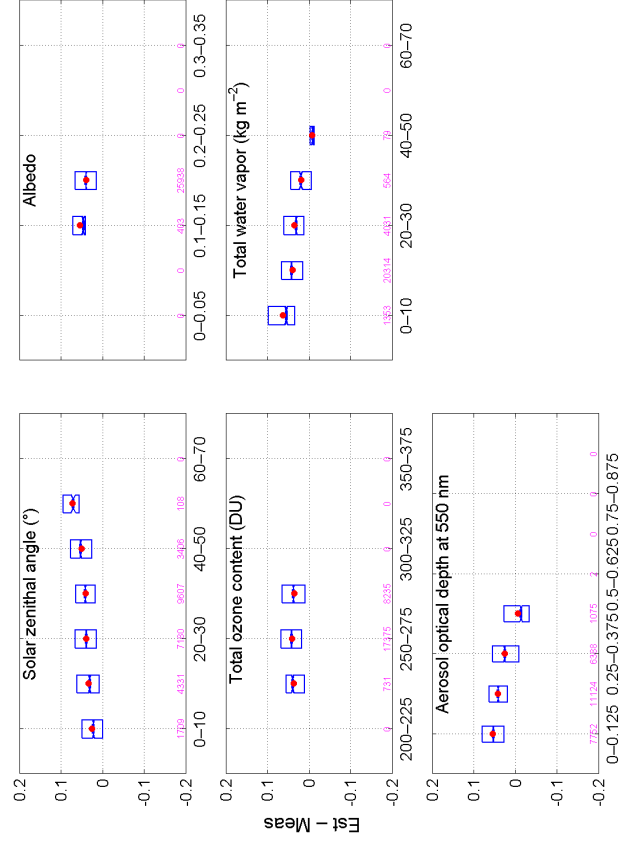

Figure S72: Comparison on direct clearness index at Kasungu

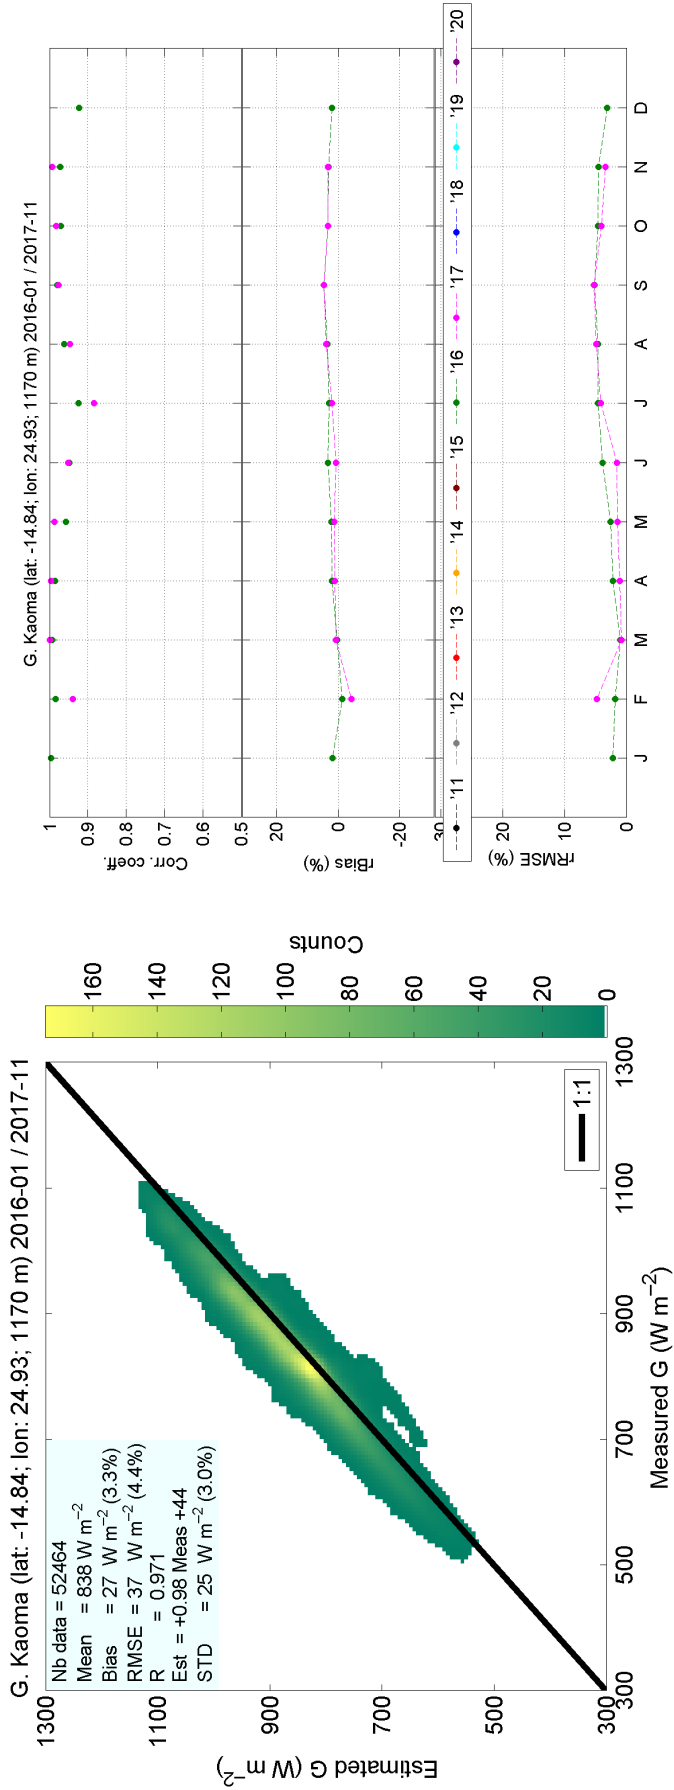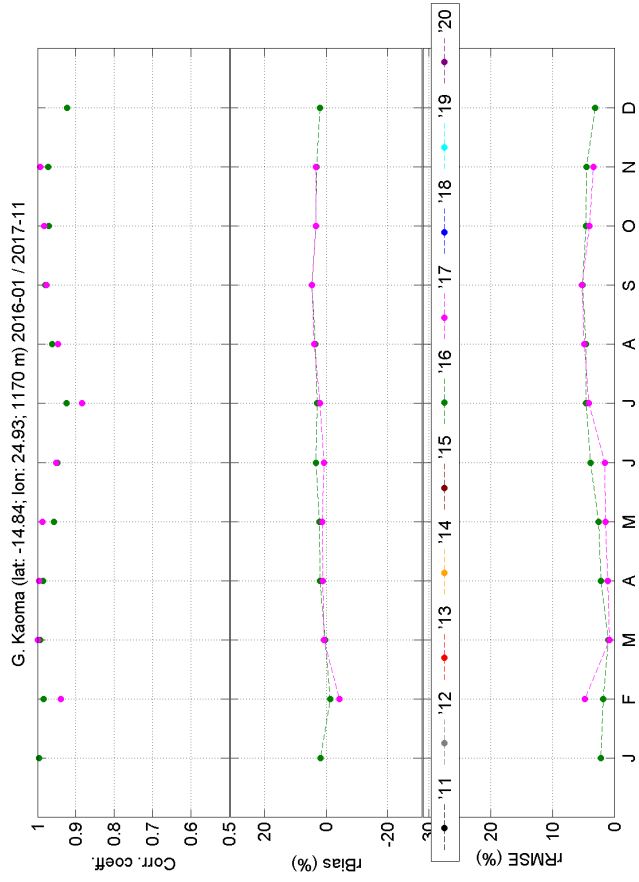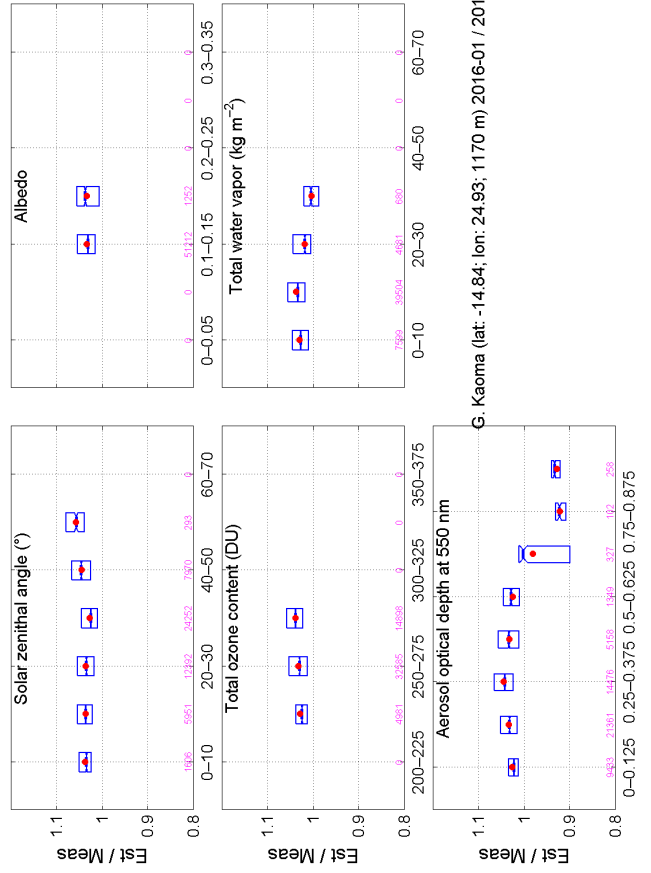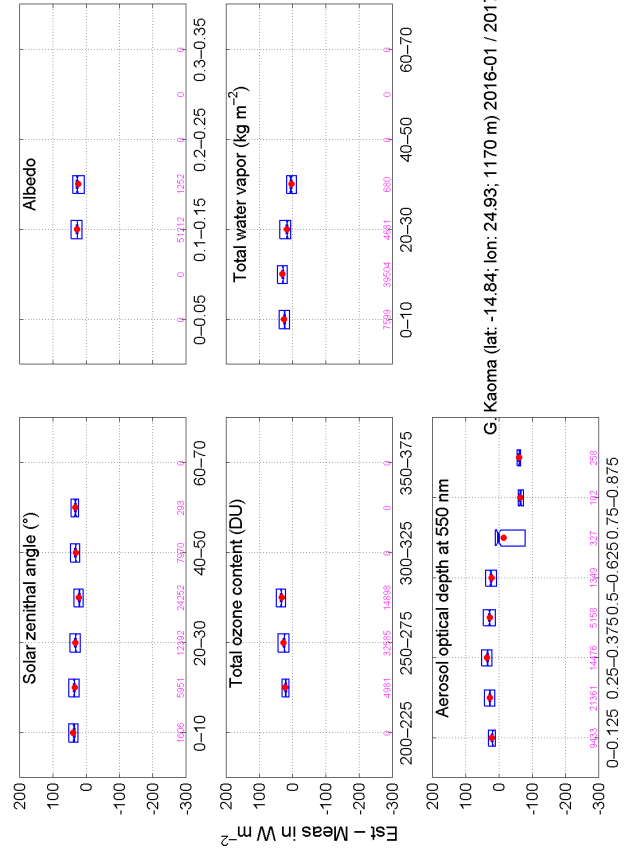

Figure S73: Comparison on global irradiance at Kaoma

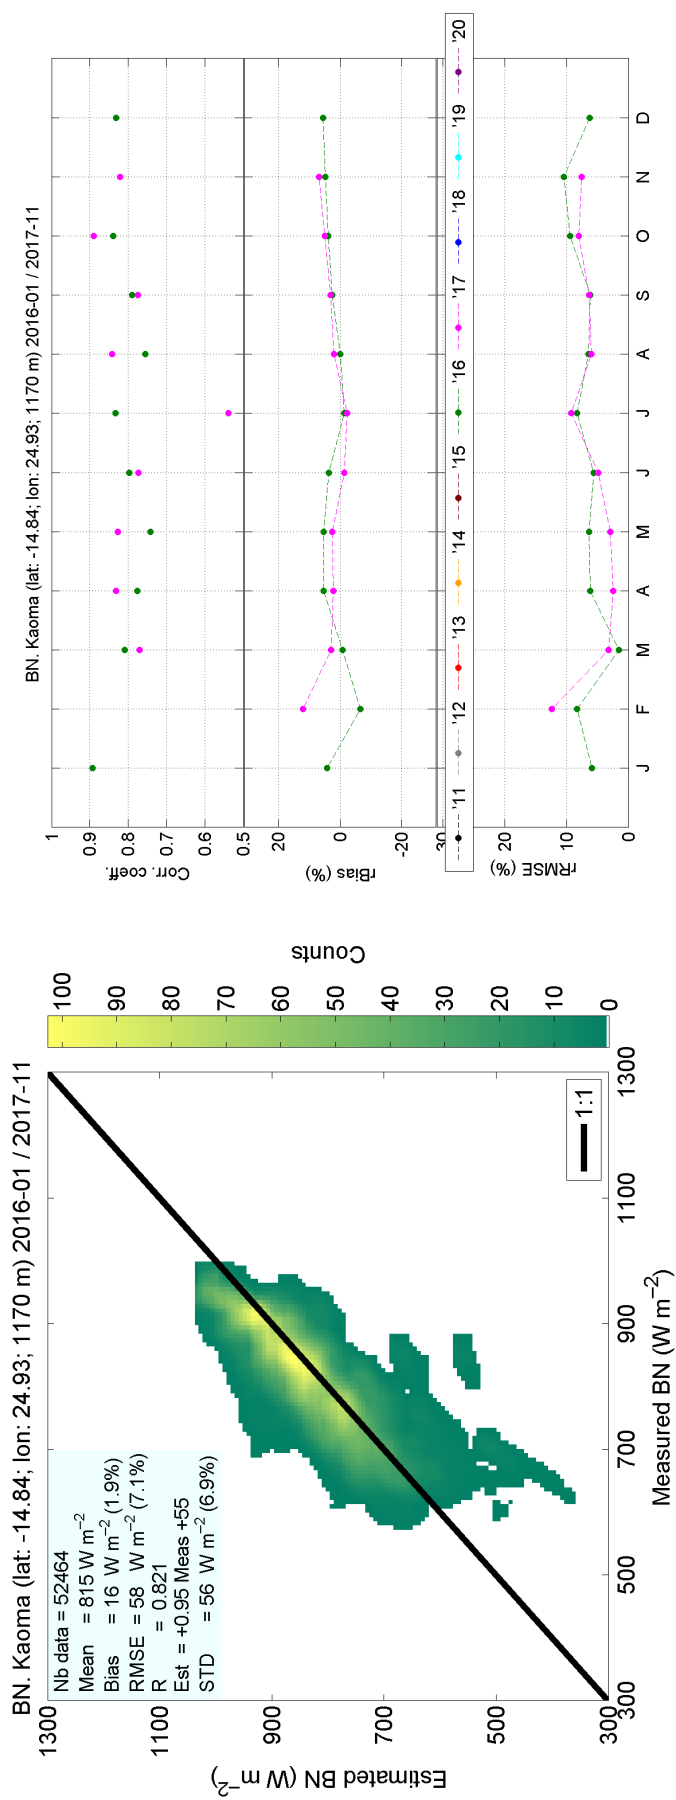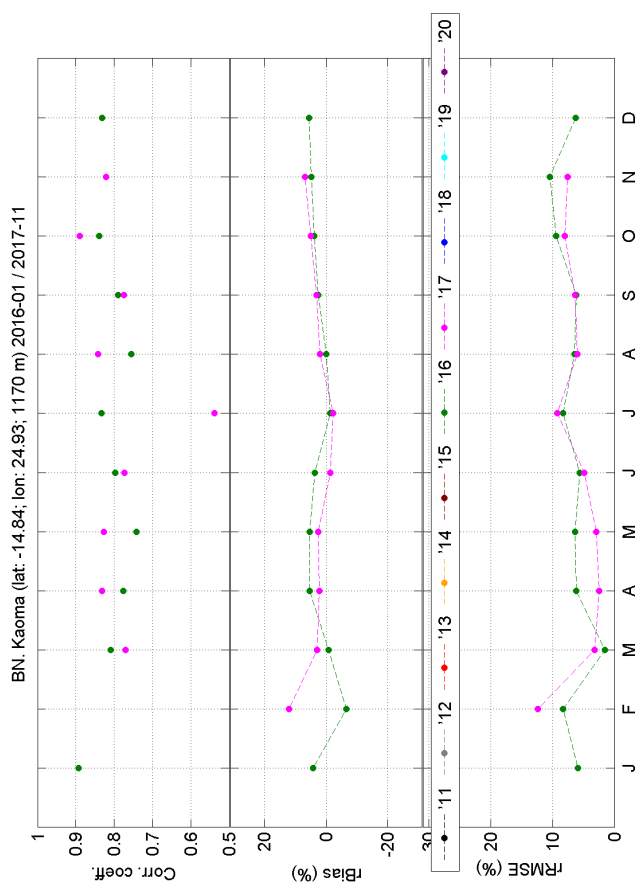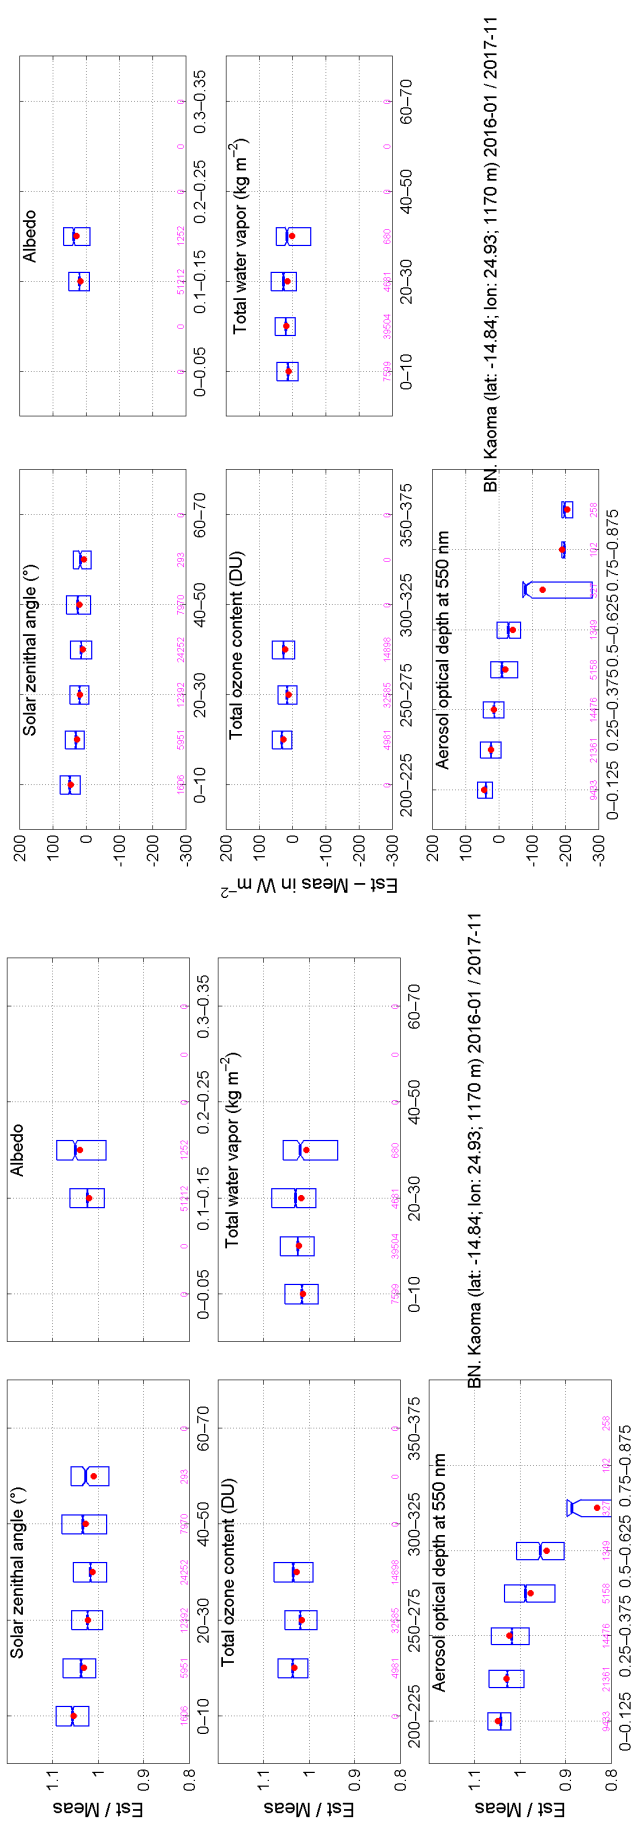

Figure S74: Comparison on direct component at normal irradiance at Kaoma

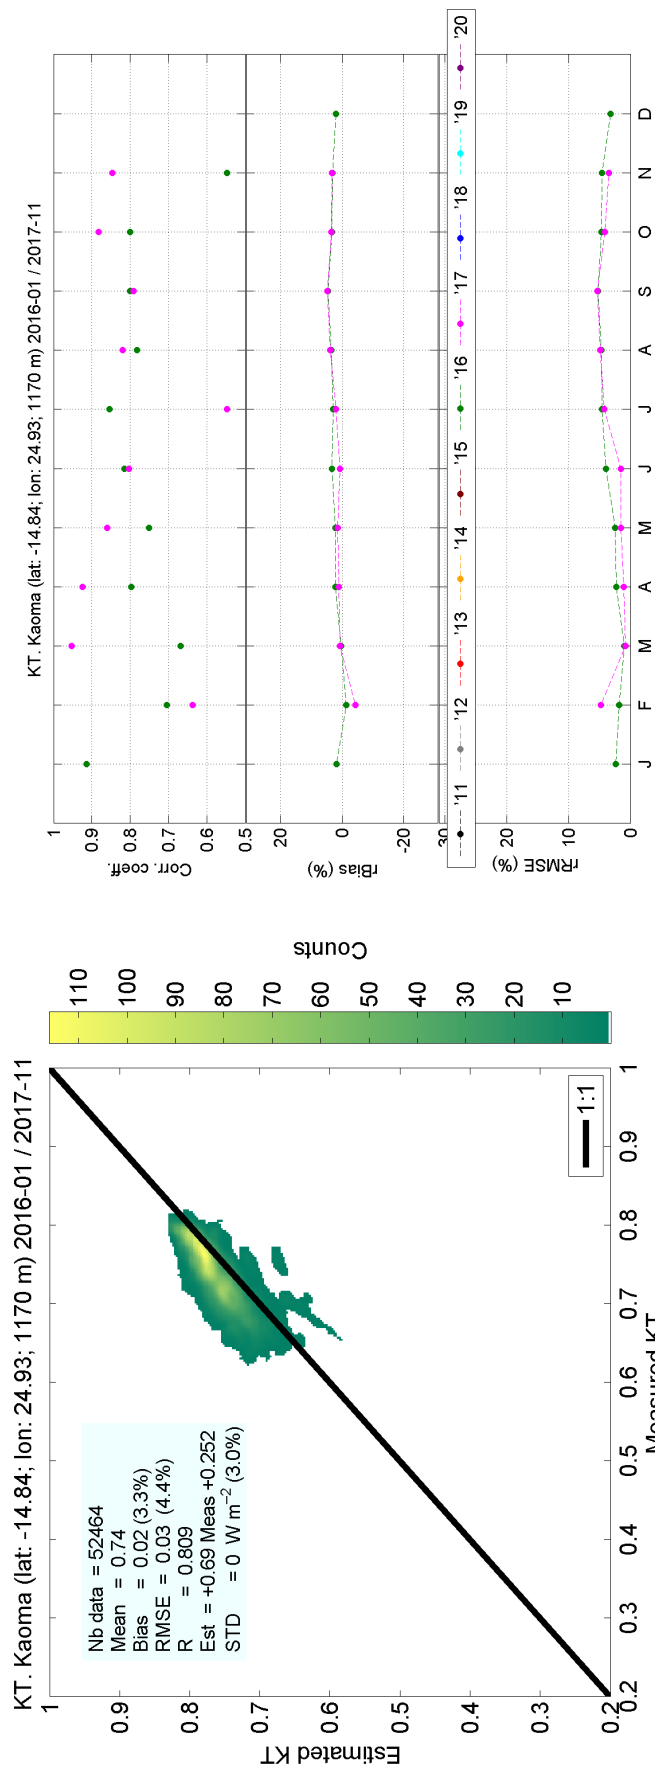

Figure S75: Comparison on clearness index at Kaoma

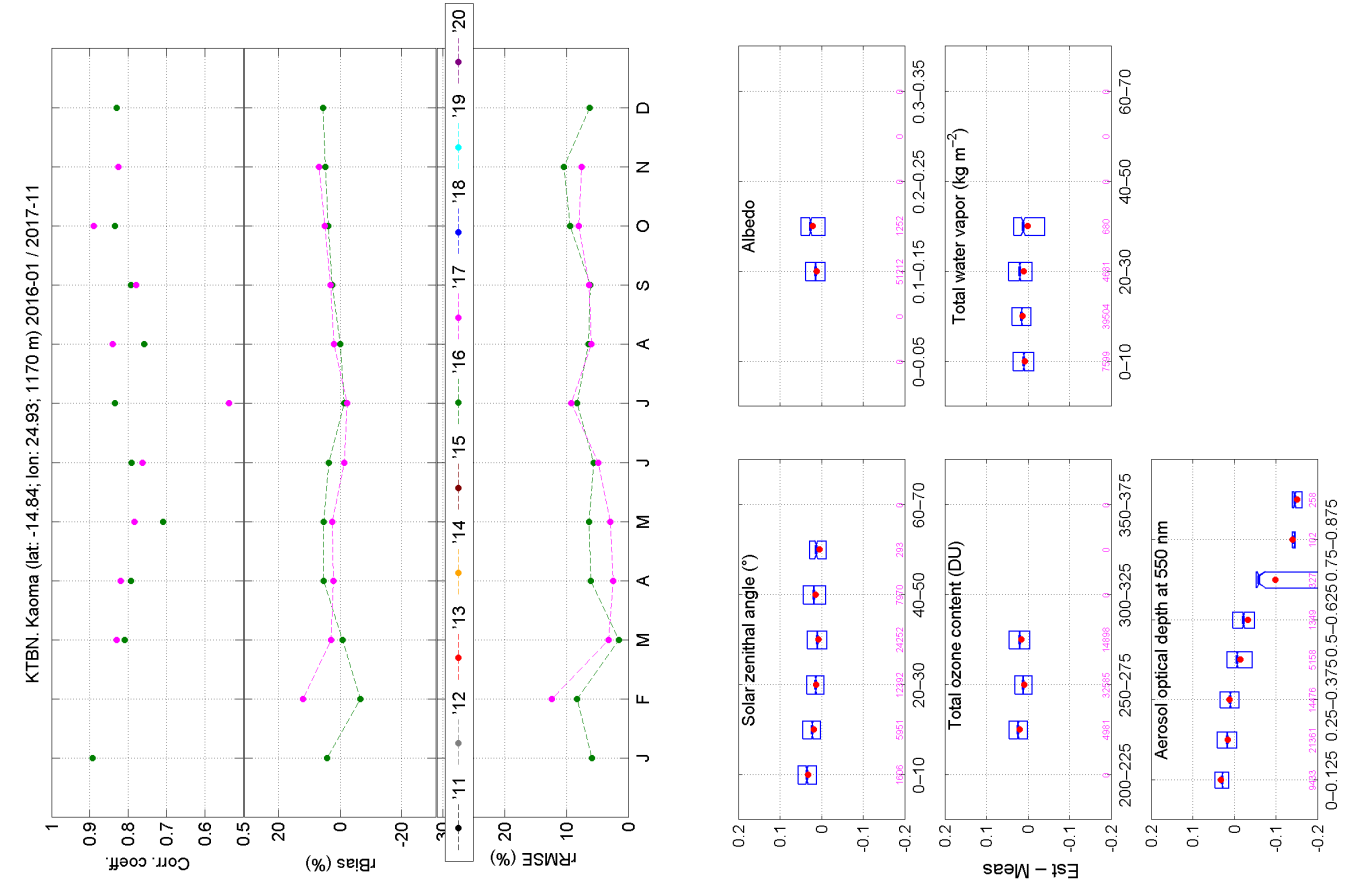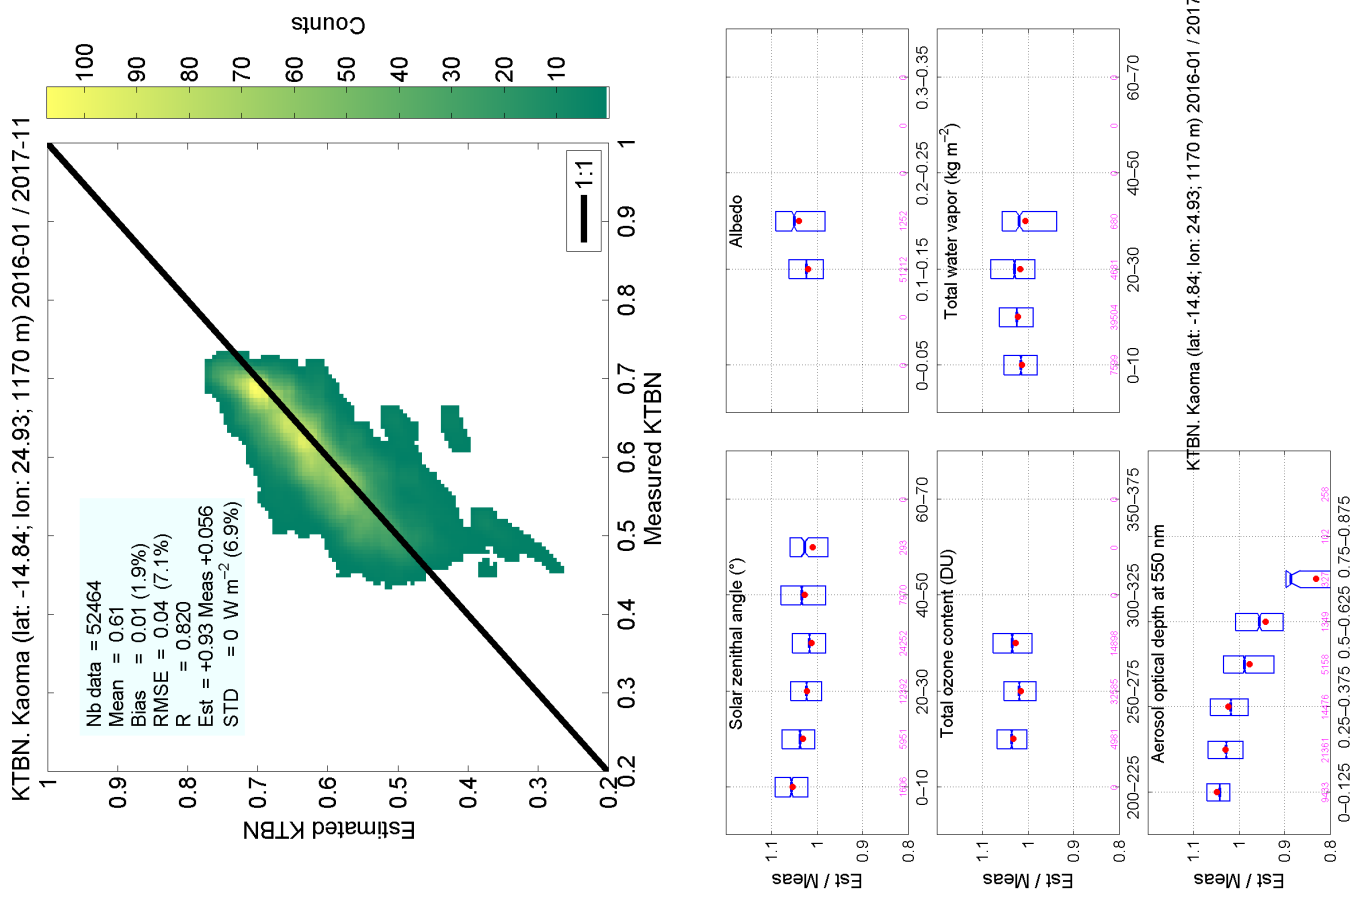

Figure S76: Comparison on direct clearness index at Kaoma

G. Fig Tree (lat: -15.00; lon: 28.55; 1143 m) 2017-09 / 2018-08

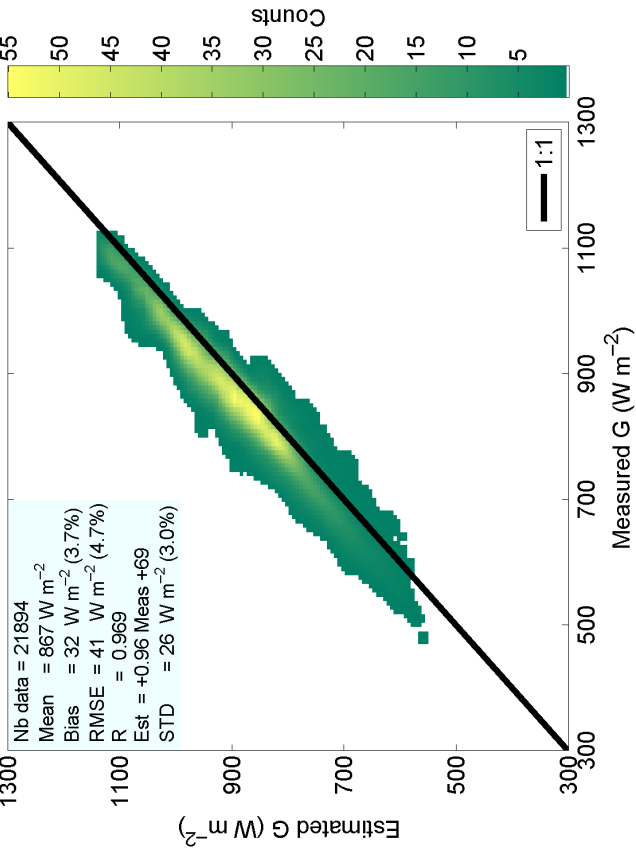

G. Fig Tree (lat: -15.00; lon: 28.55; 1143 m) 2017-09 / 2018-08

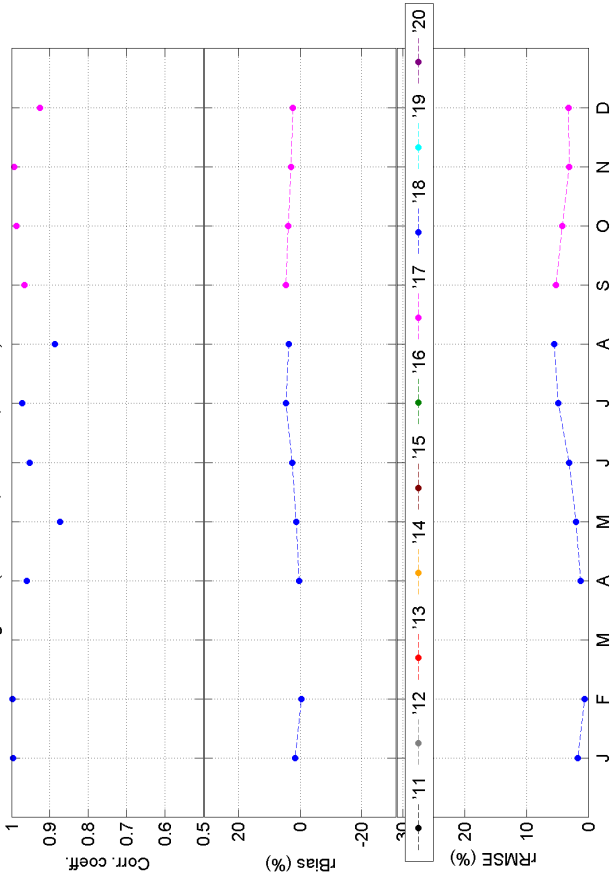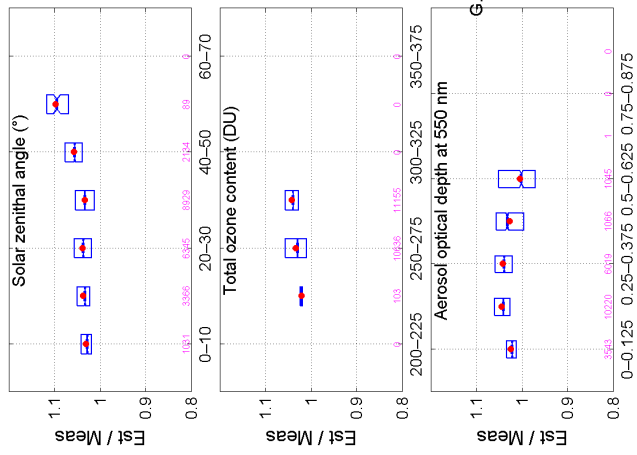

G. Fig Tree (lat: -15.00; lon: 28.55; 1143 m) 2017-09 / 2018-08

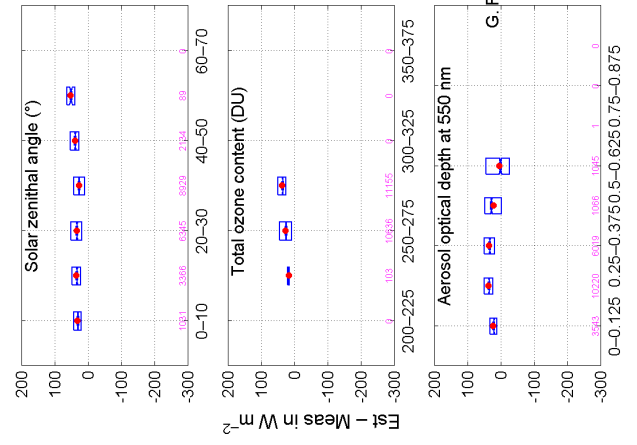

G. Fig Tree (lat: -15.00; lon: 28.55; 1143 m) 2017-09 / 2018-08

Figure S77: Comparison on global irradiance at Fig Tree

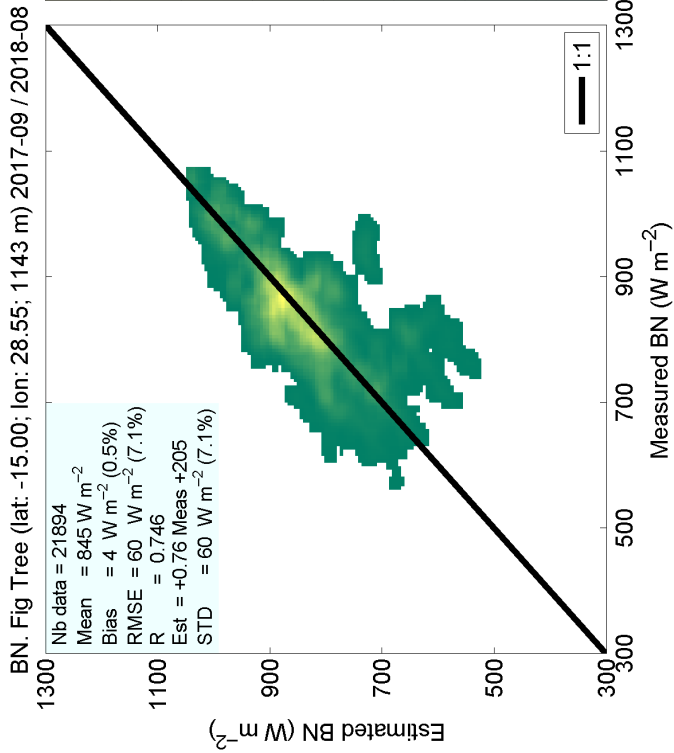

BN, Fig Tree (lat: -15.00; lon: 28.55; 1143 m) 2017-09 / 2018-08

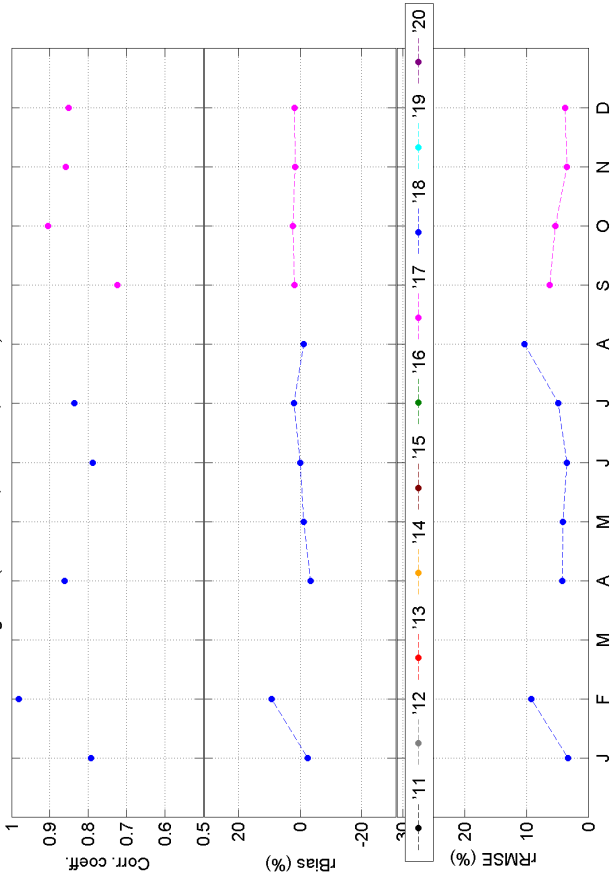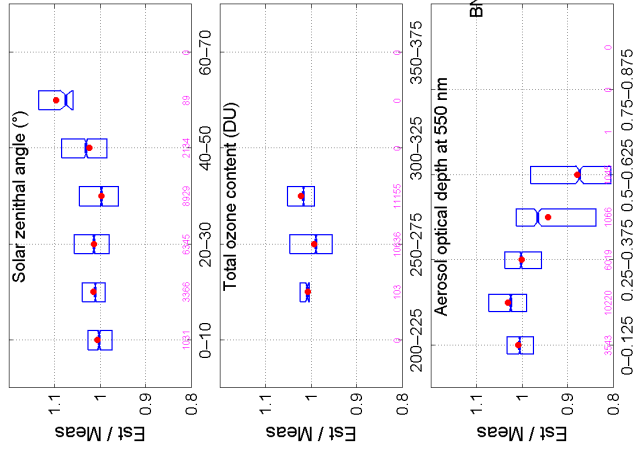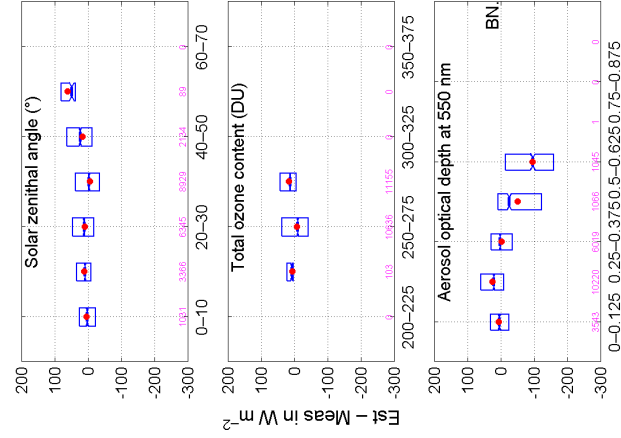

Figure S78: Comparison on direct component at normal irradiance at Fig Tree



KT. Fig Tree (lat: -15.00; lon: 28.55; 1143 m) 2017-09 / 2018-08

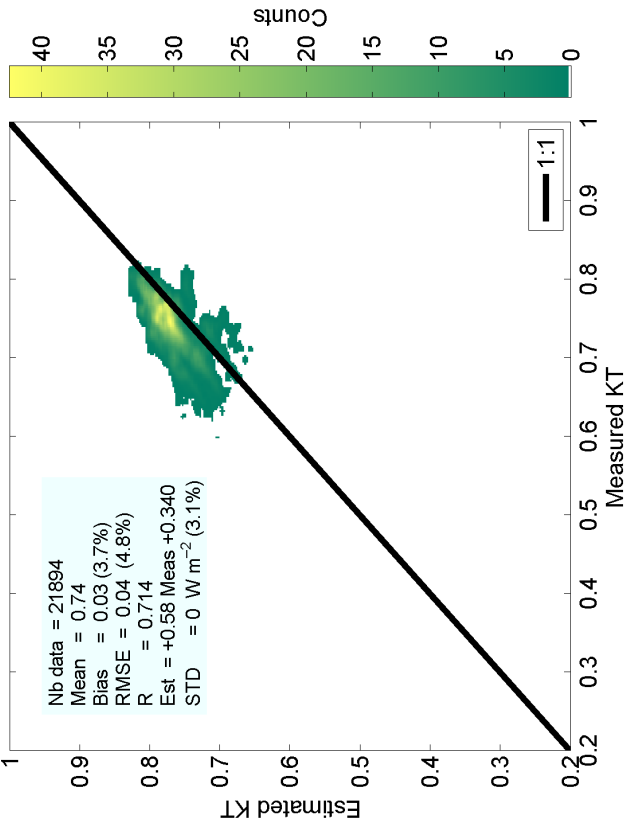

KT. Fig Tree (lat: -15.00; lon: 28.55; 1143 m) 2017-09 / 2018-08

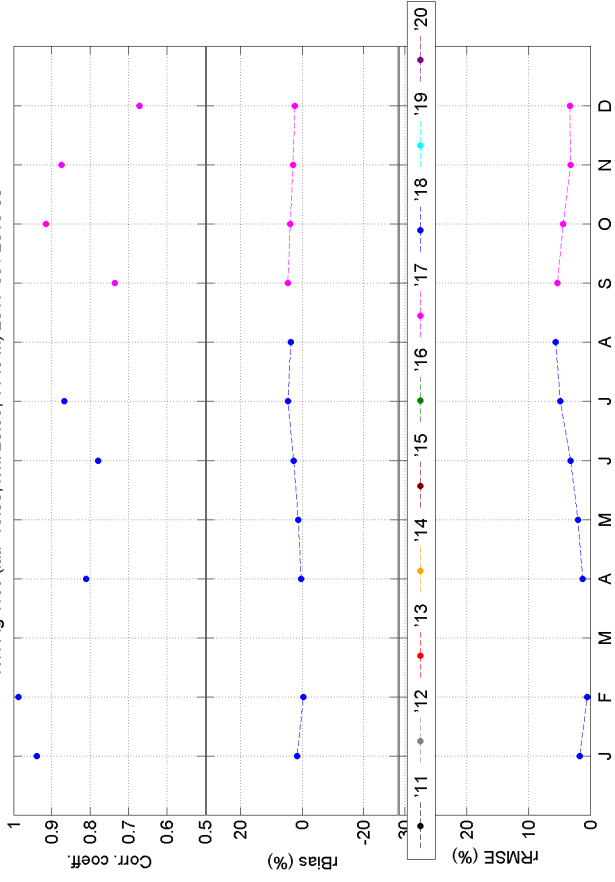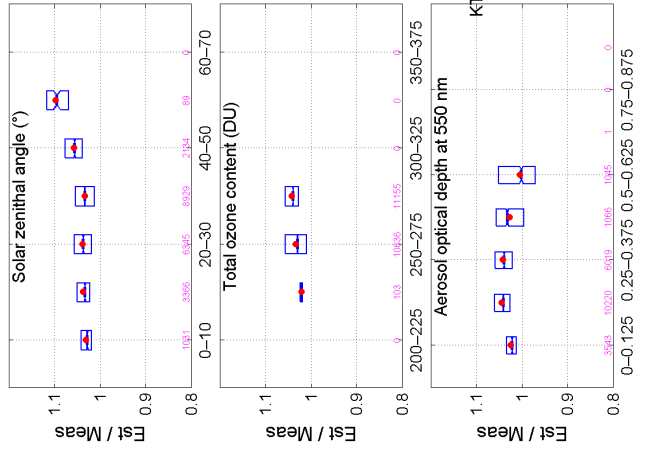

KT. Fig Tree (lat: -15.00; lon: 28.55; 1143 m) 2017-09 / 2018-08

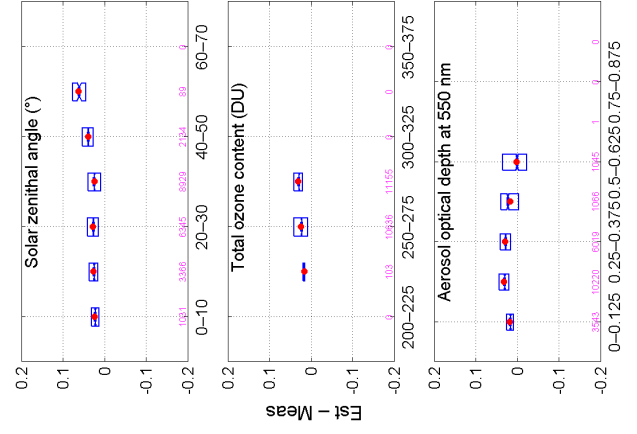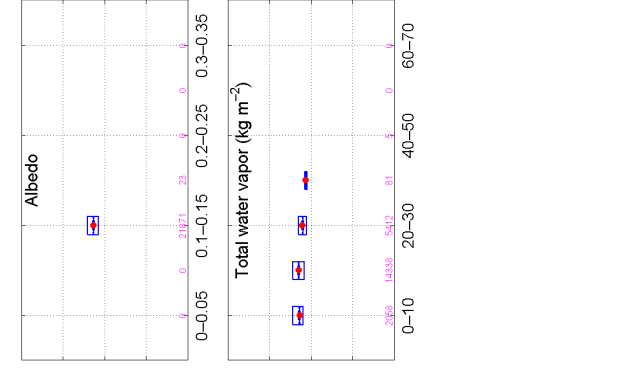

KTBN. Fig Tree (lat: -15.00; lon: 28.55; 1143 m) 2017-09 / 2018-08

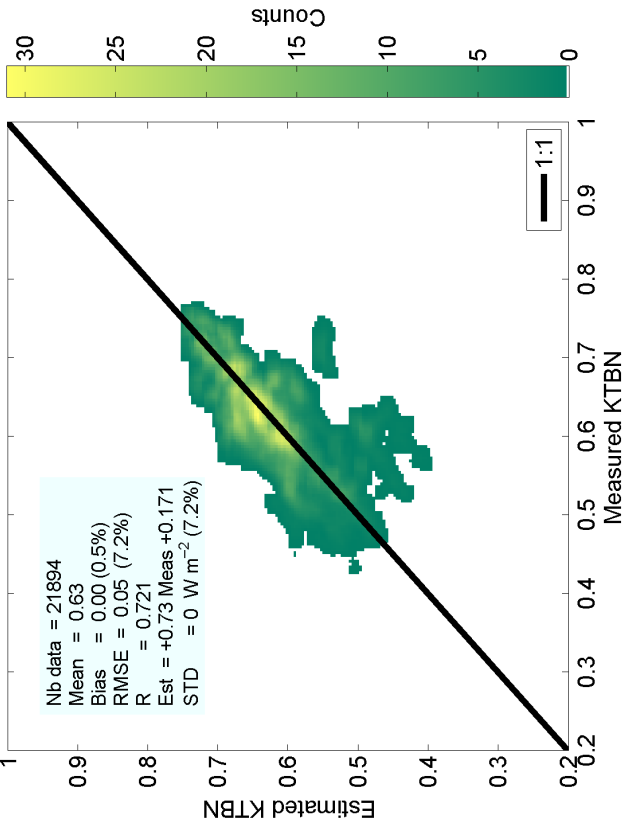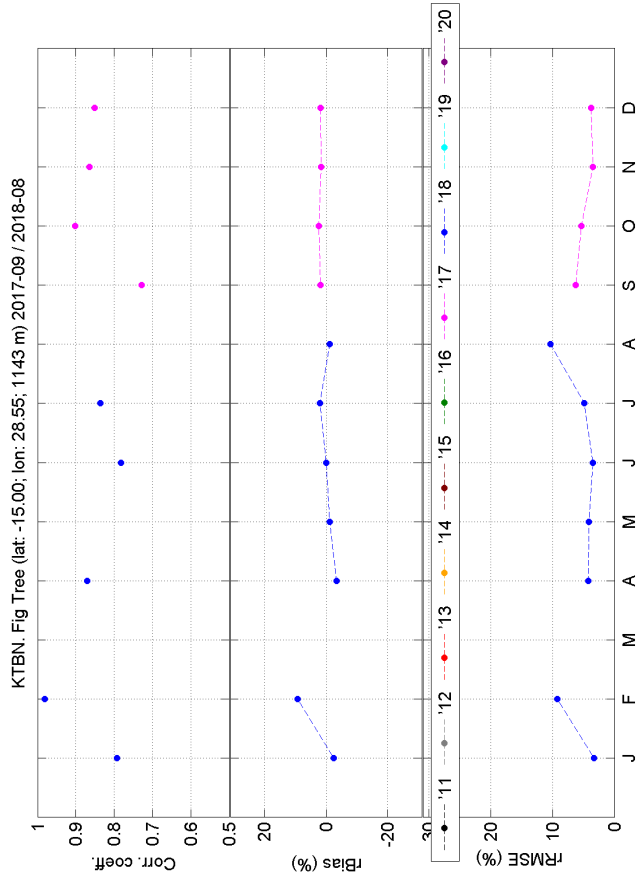

KTBN. Fig Tree (lat: -15.00; lon: 28.55; 1143 m) 2017-09 / 2018-08

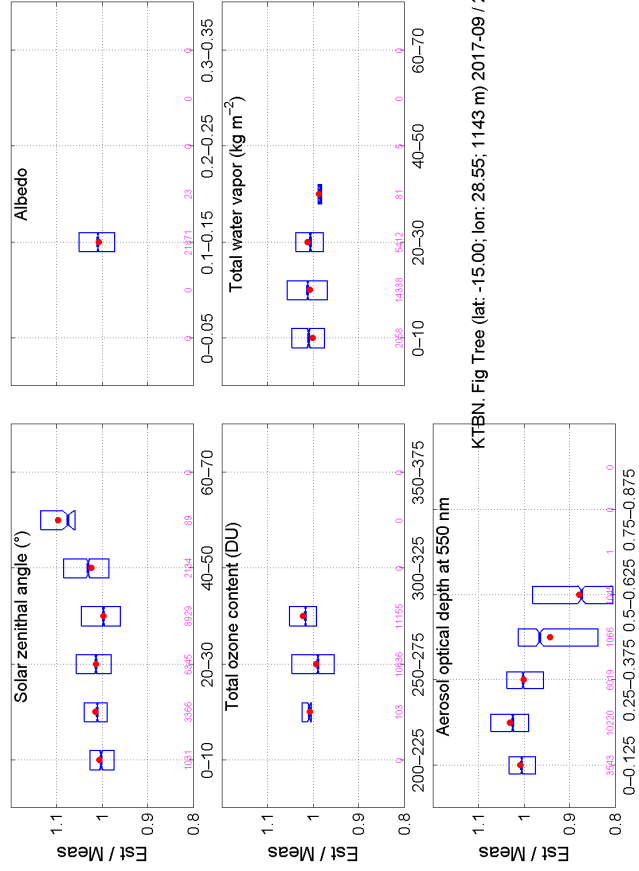

KTBN. Fig Tree (lat: -15.00; lon: 28.55; 1143 m) 2017-09 / 2018-08

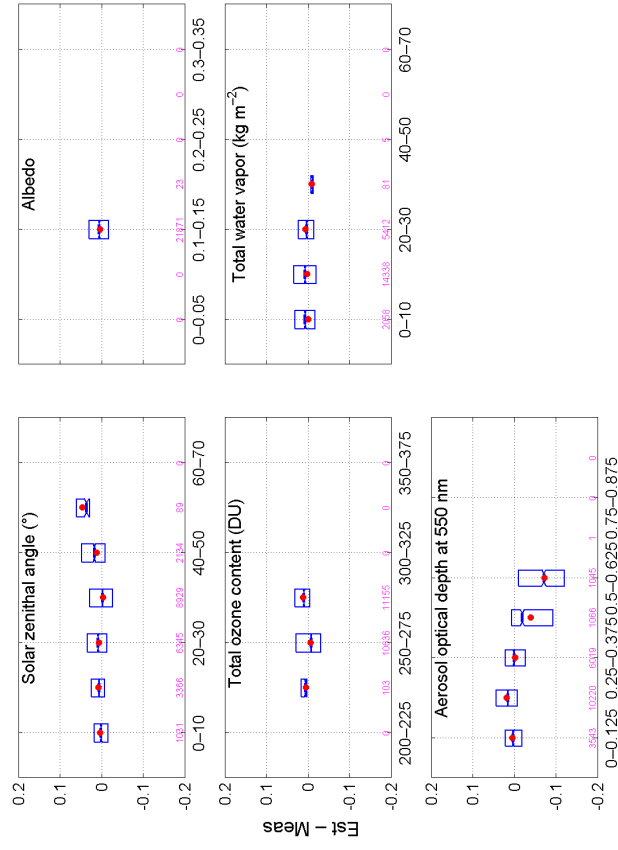

Figure S80: Comparison on direct clearness index at Fig Tree

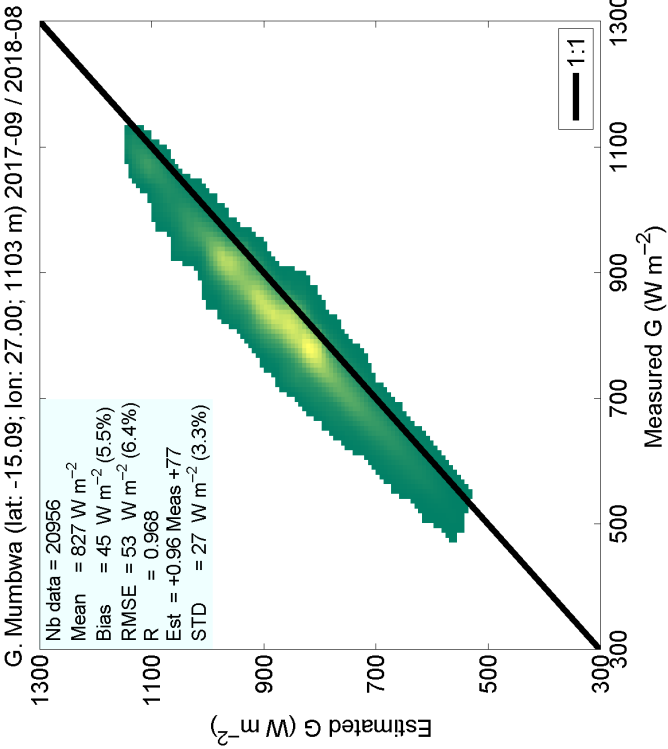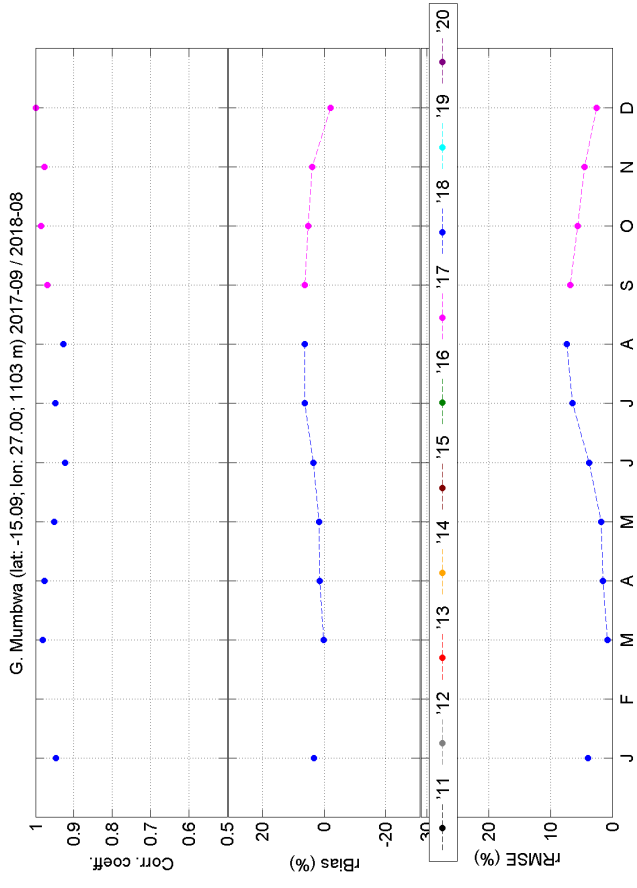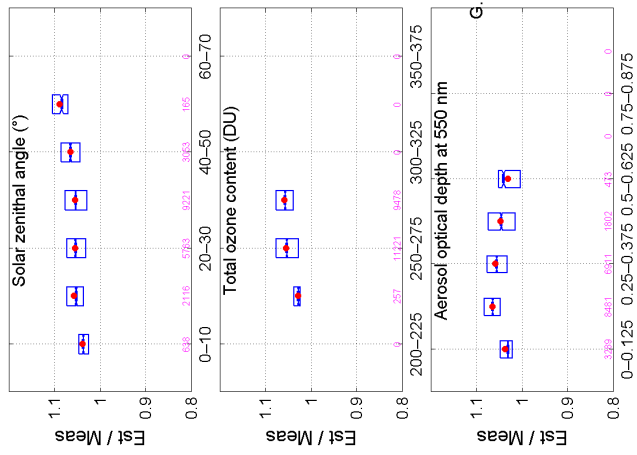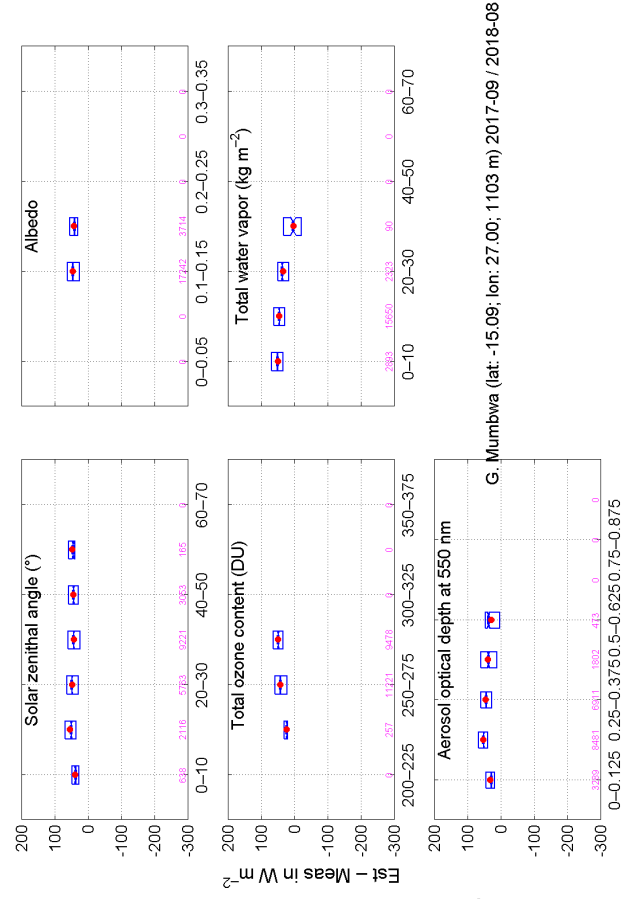

Figure S81: Comparison on global irradiance at Mumbwa

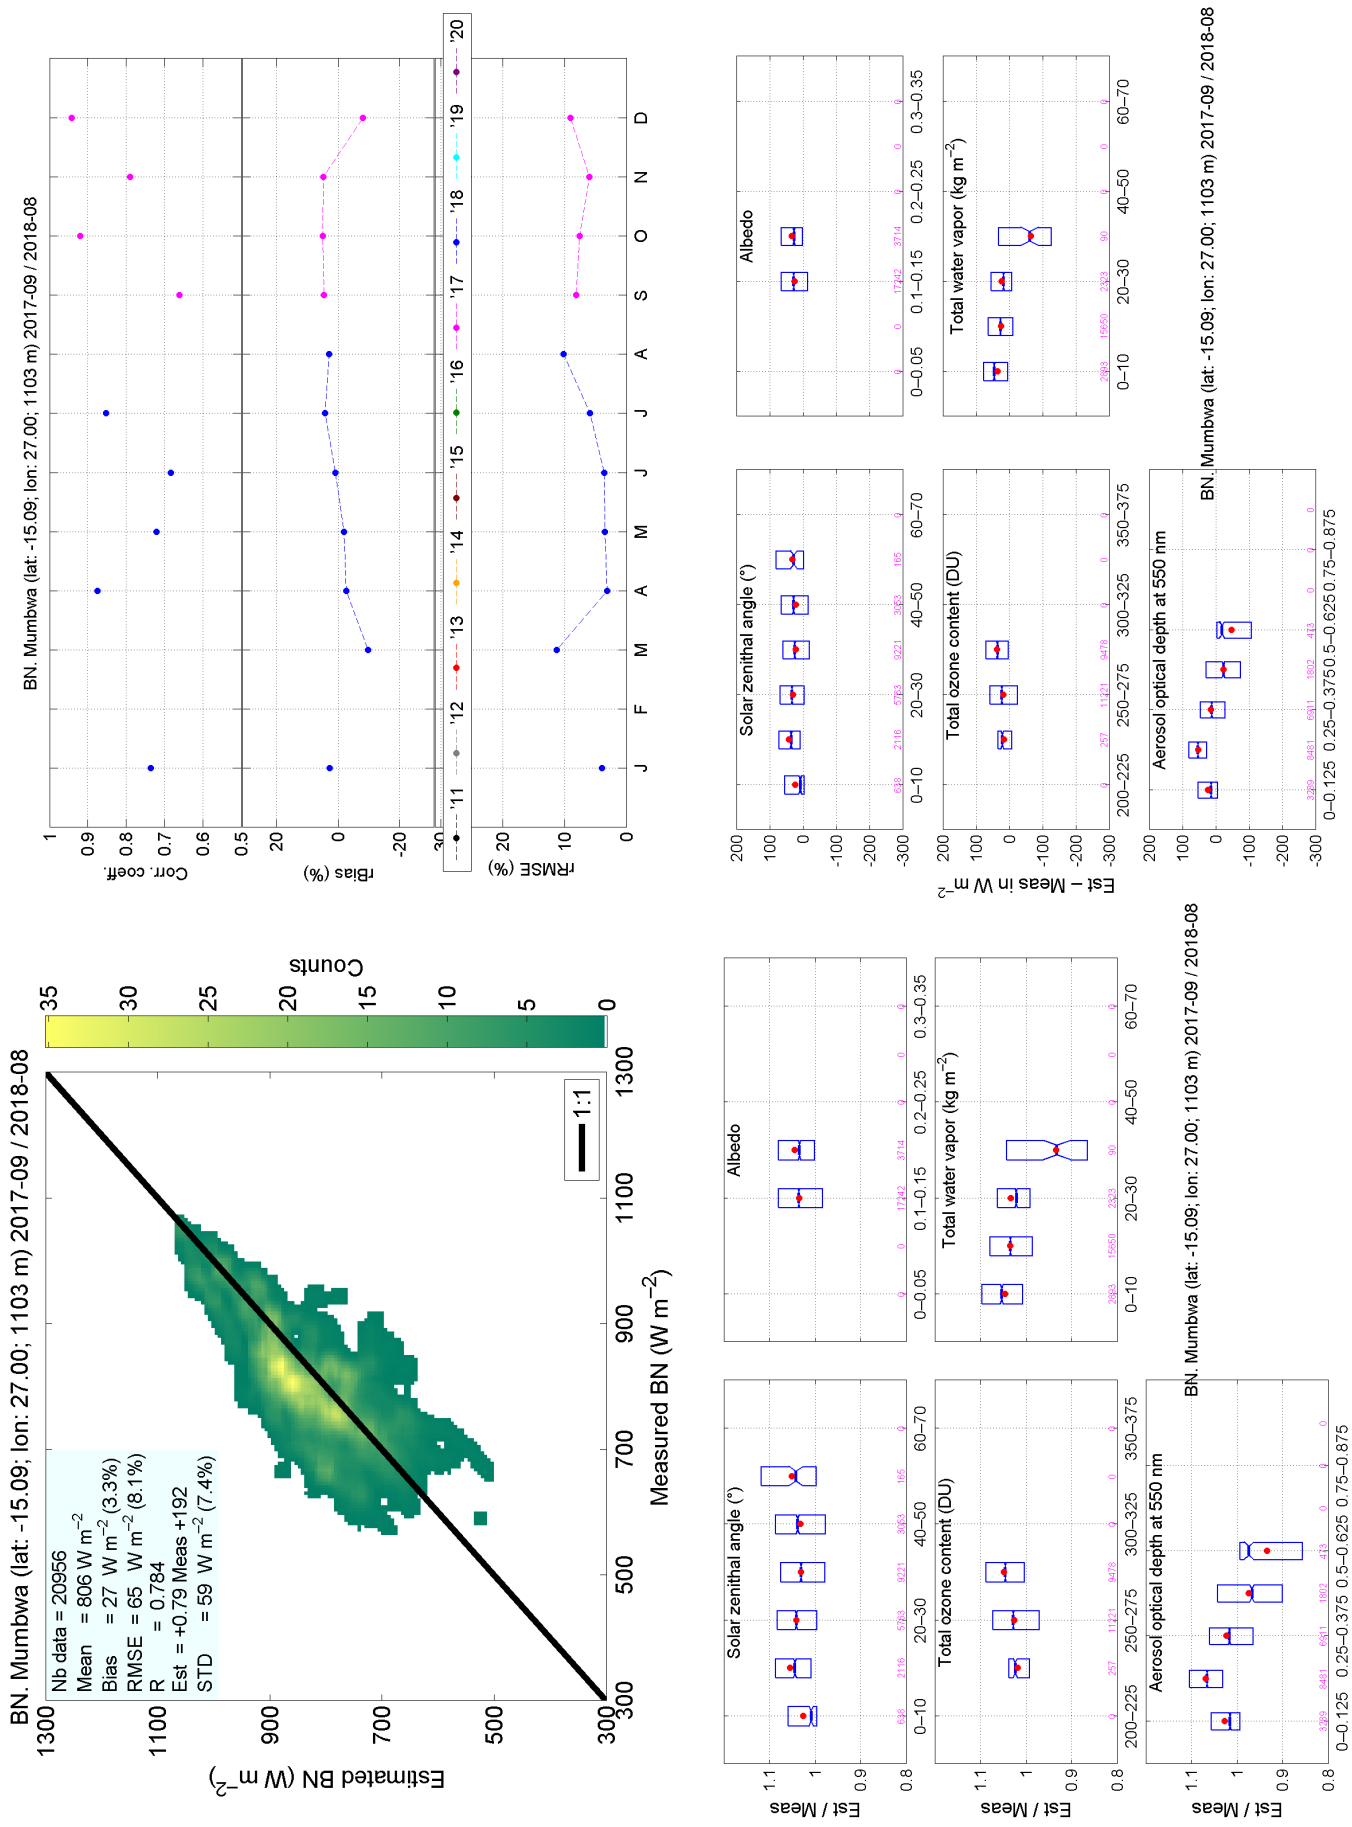

Figure S82: Comparison on direct component at normal irradiance at Mumbwa

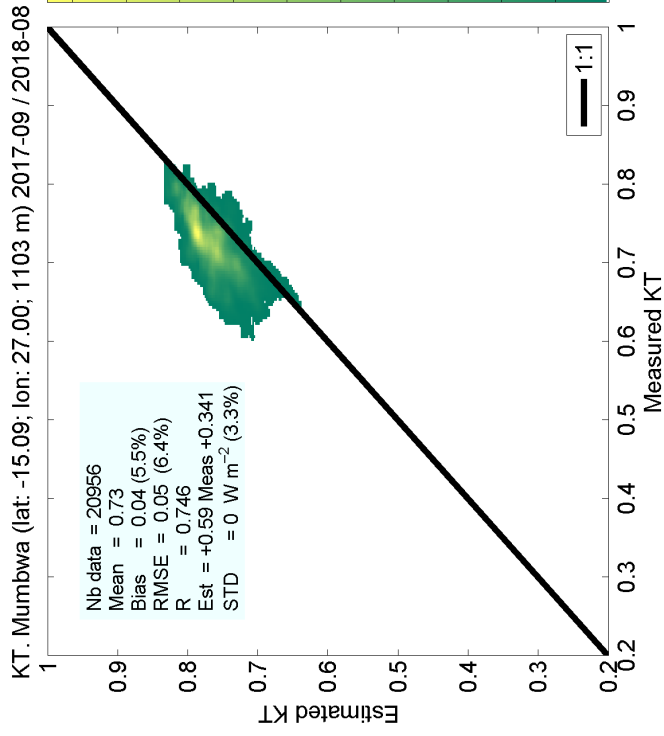

KT. Mumbai (lat: -15.09; lon: 27.00; 1103 m) 2017-09 / 2018-08

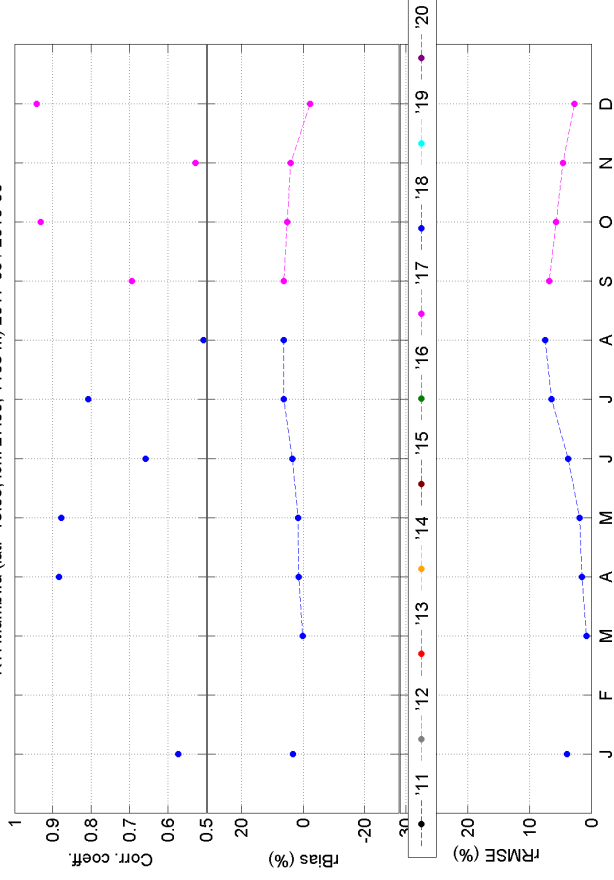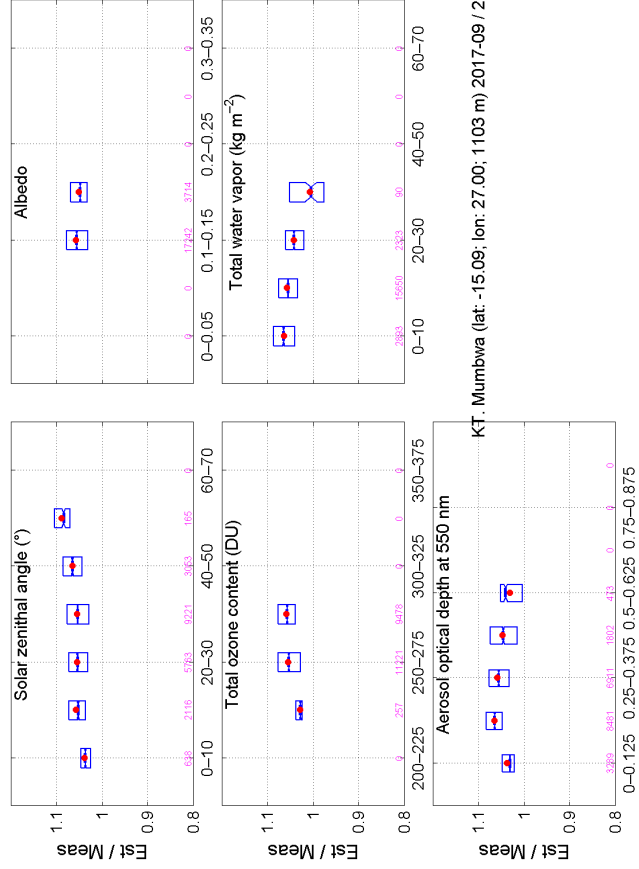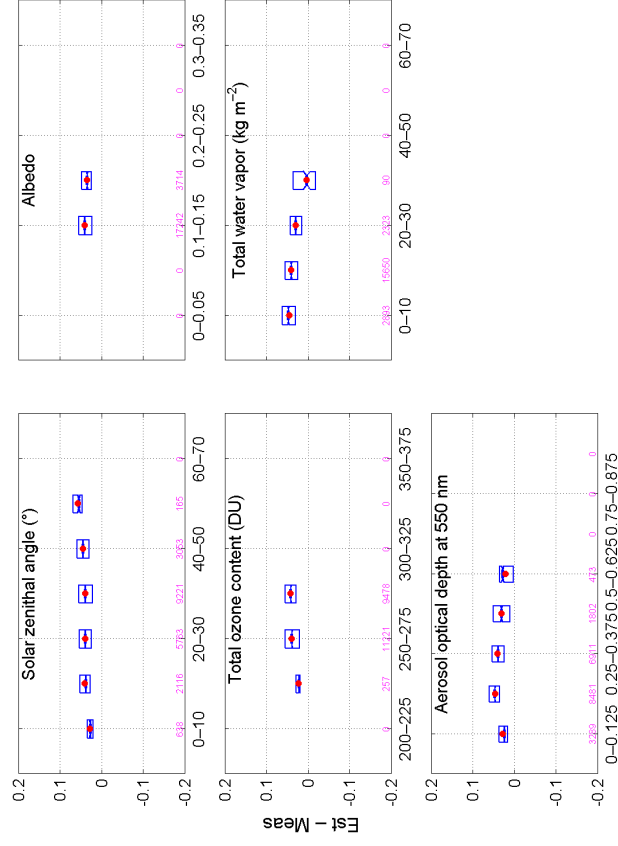

Figure S83: Comparison on clearness index at Mumbai

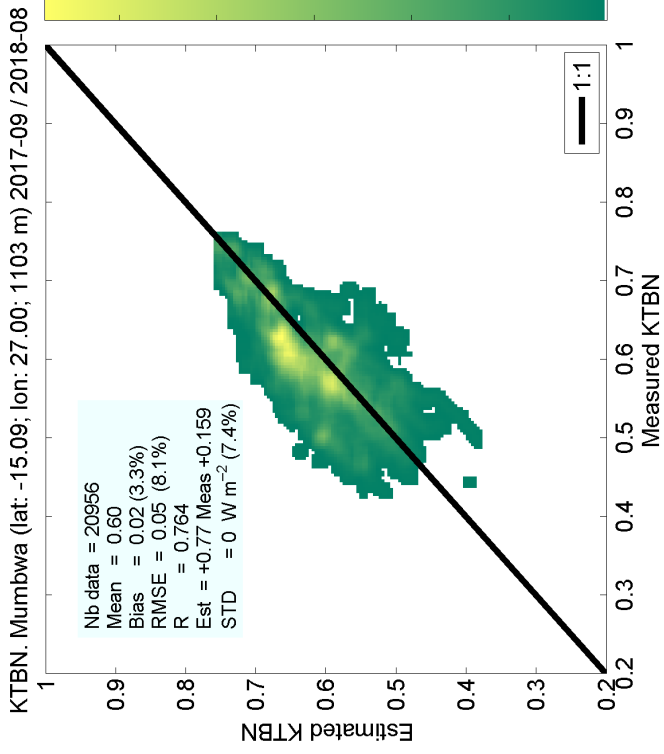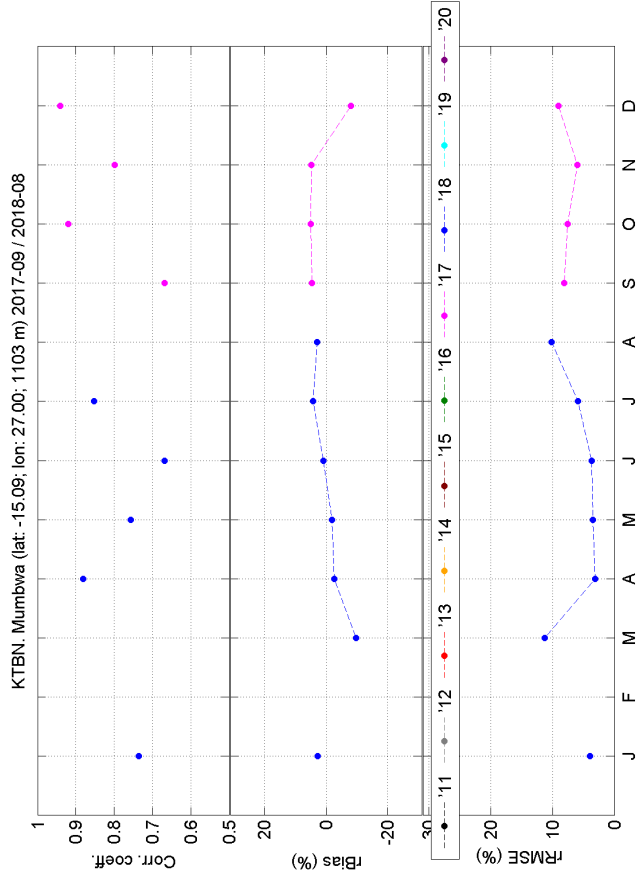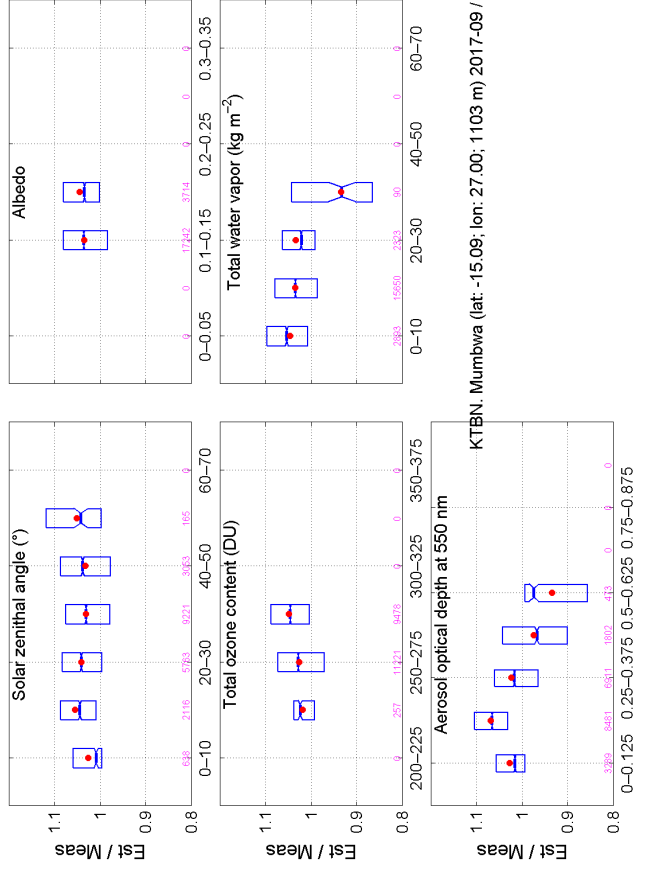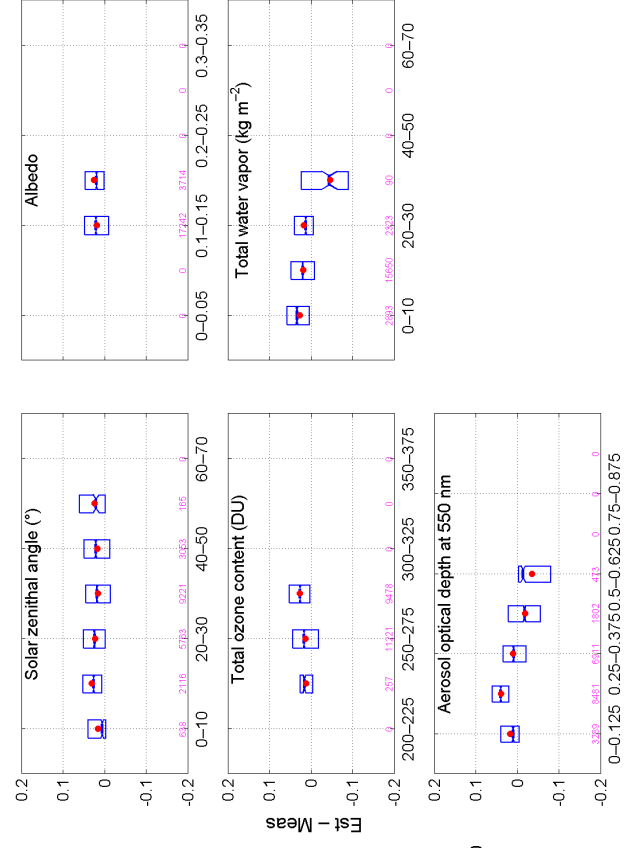

Figure S84: Comparison on direct clearness index at Mumbwa

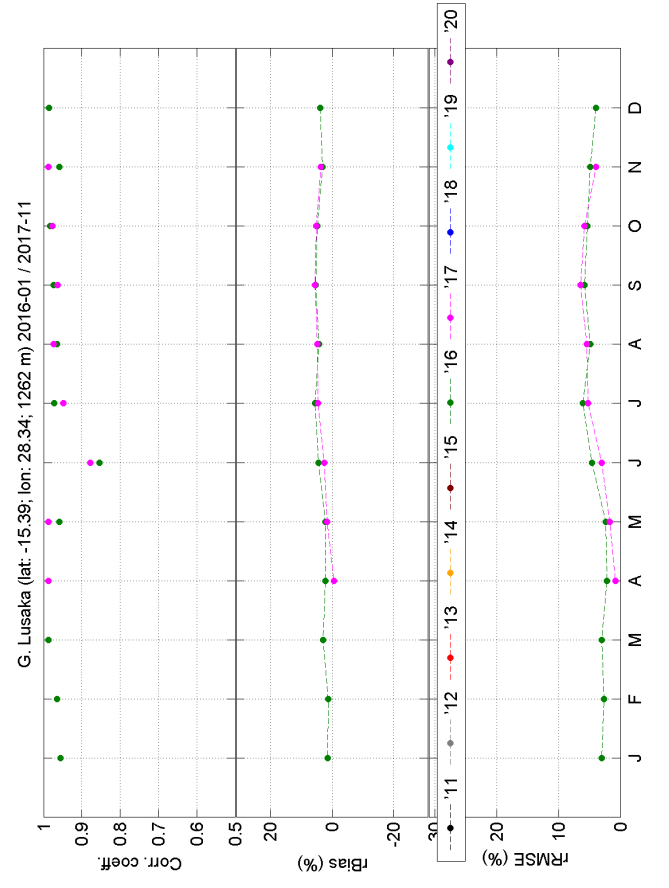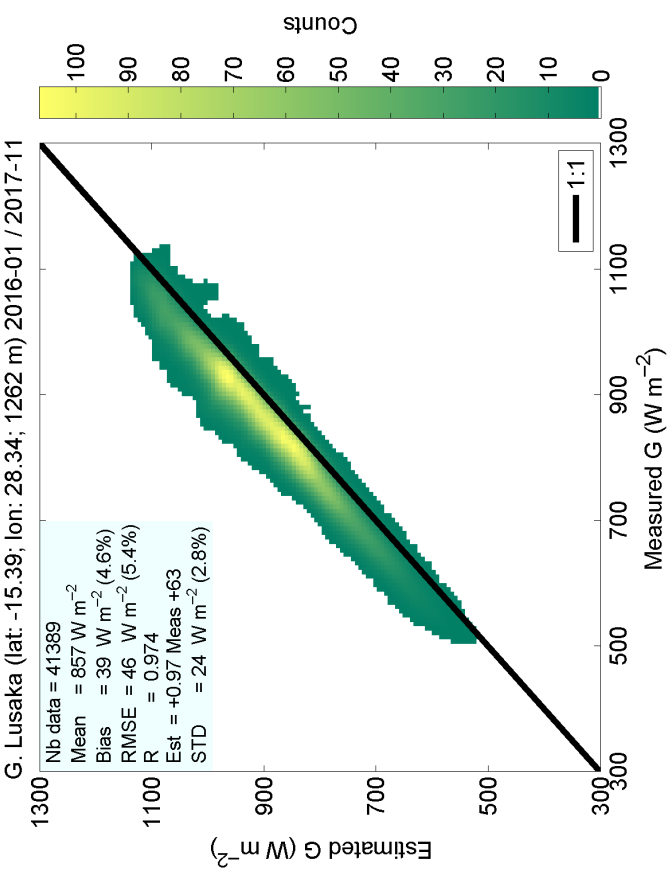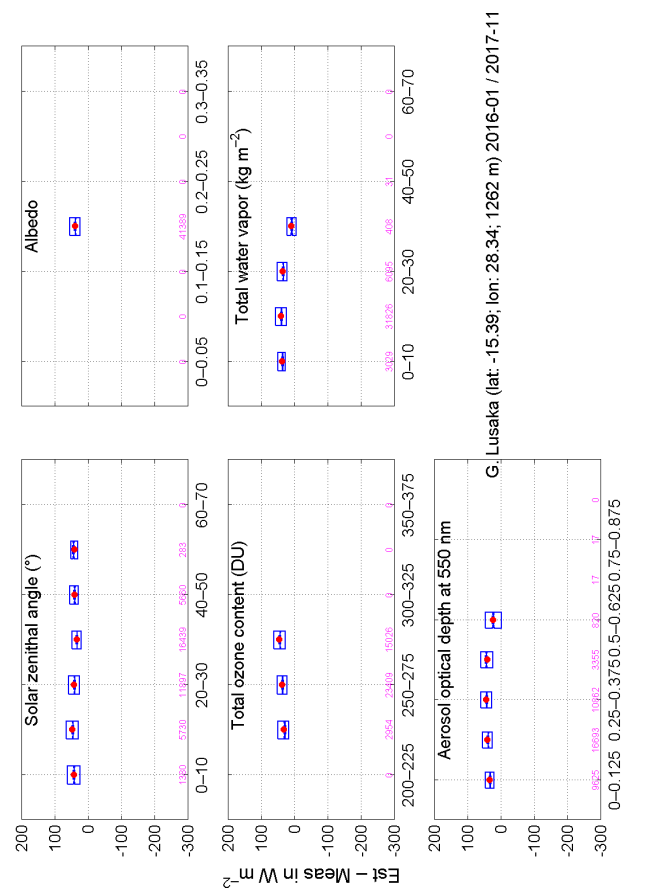

Figure S85: Comparison on global irradiance at Lusaka

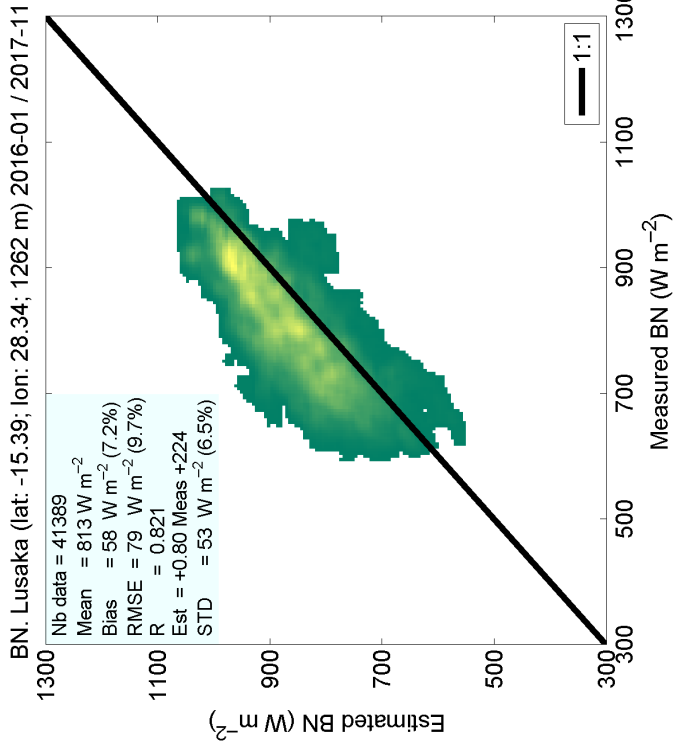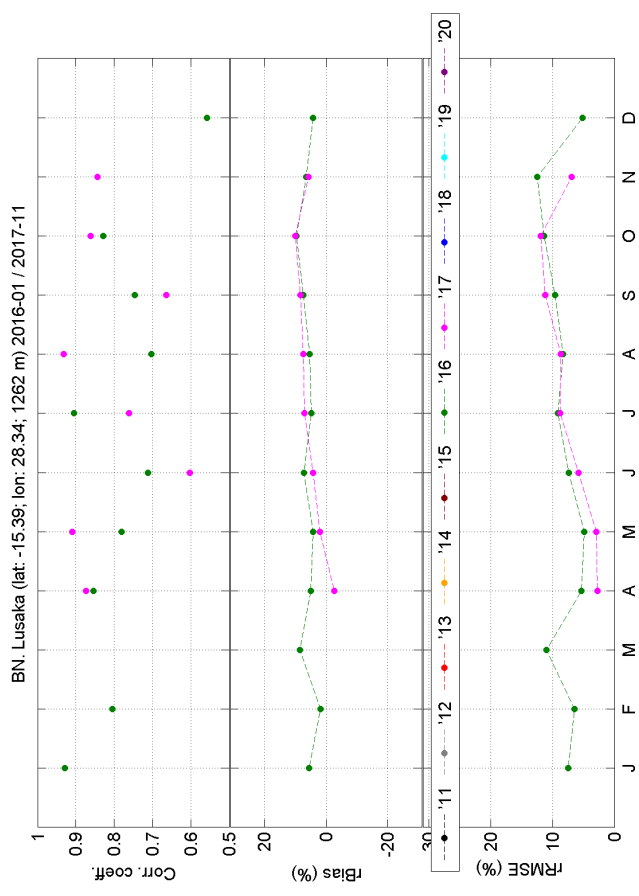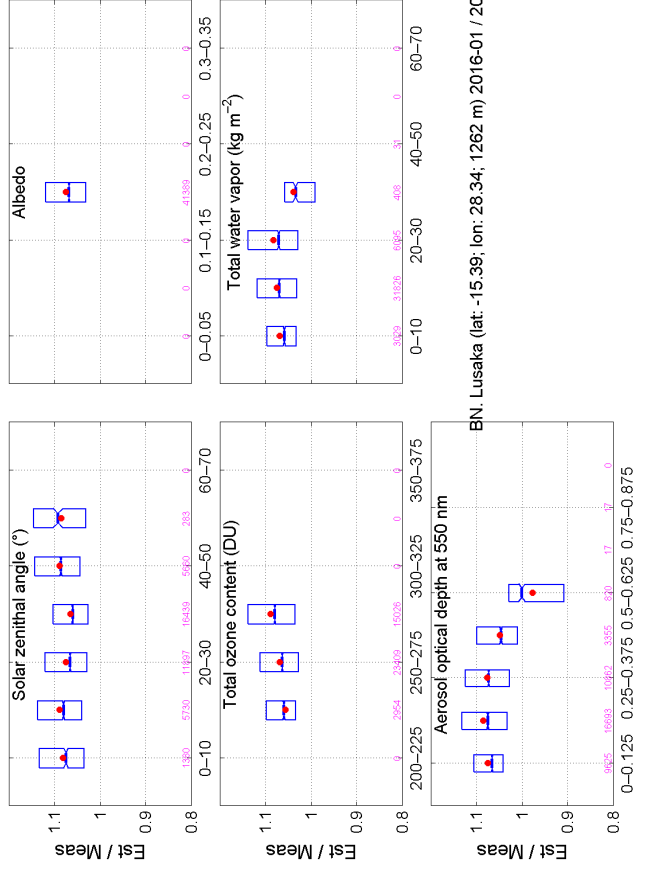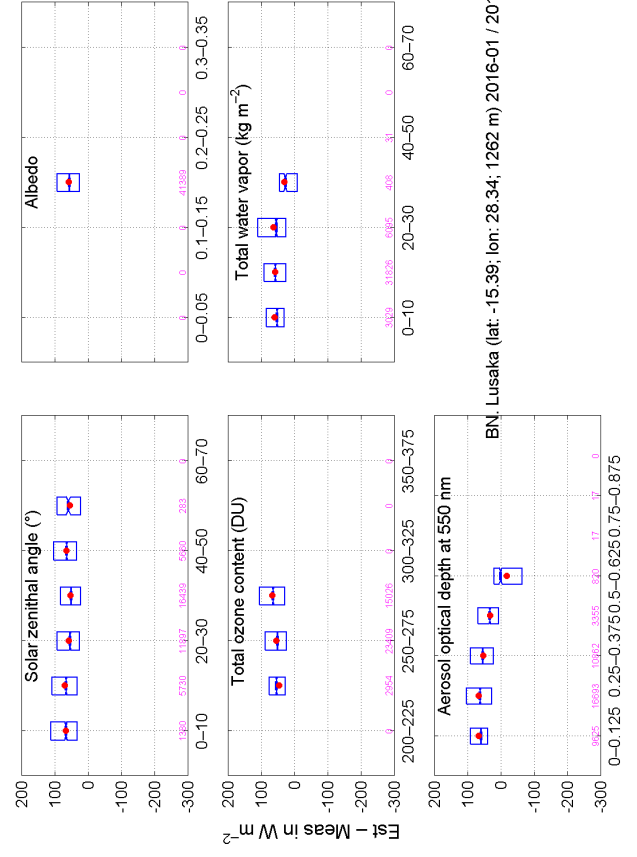

Figure S86: Comparison on direct component at normal irradiance at Lusaka



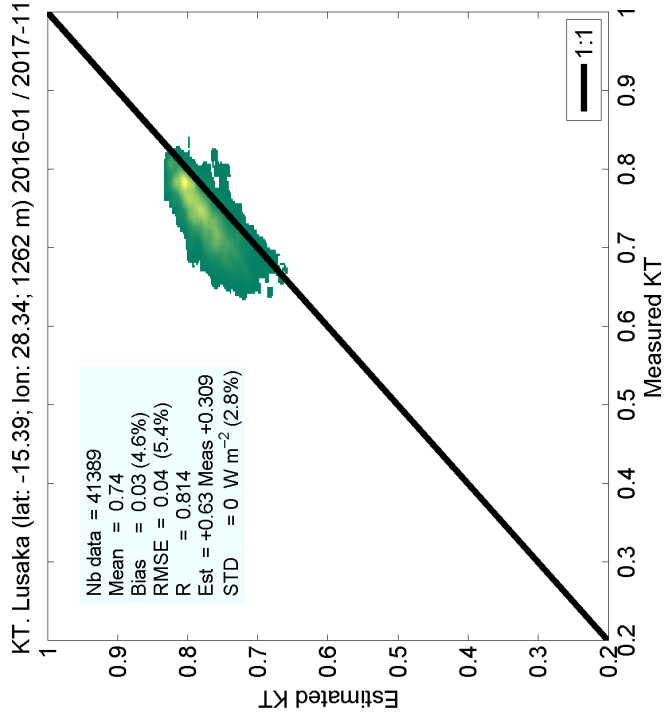

KT. Lusaka (lat: -15.39; lon: 28.34; 1262 m) 2016-01 / 2017-11

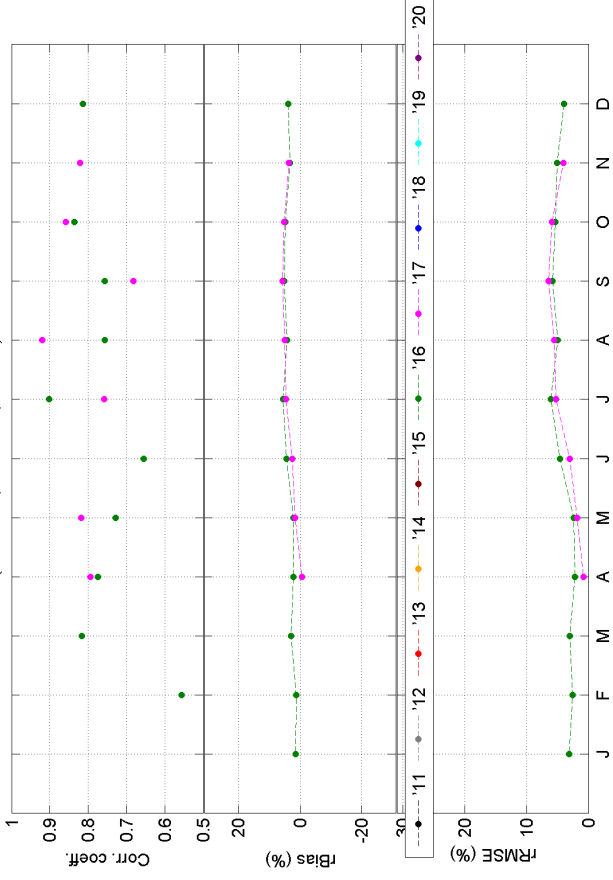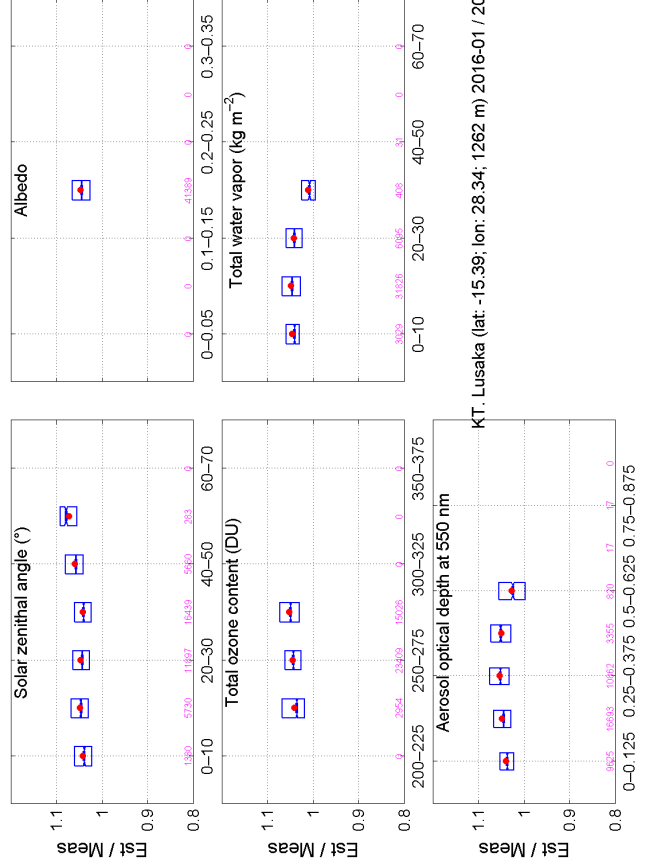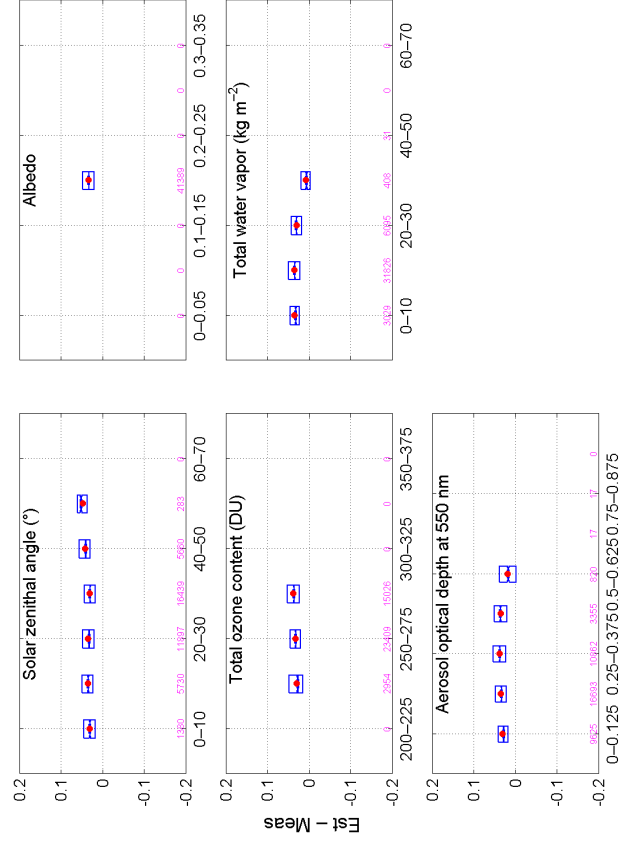

Figure S87: Comparison on clearness index at Lusaka

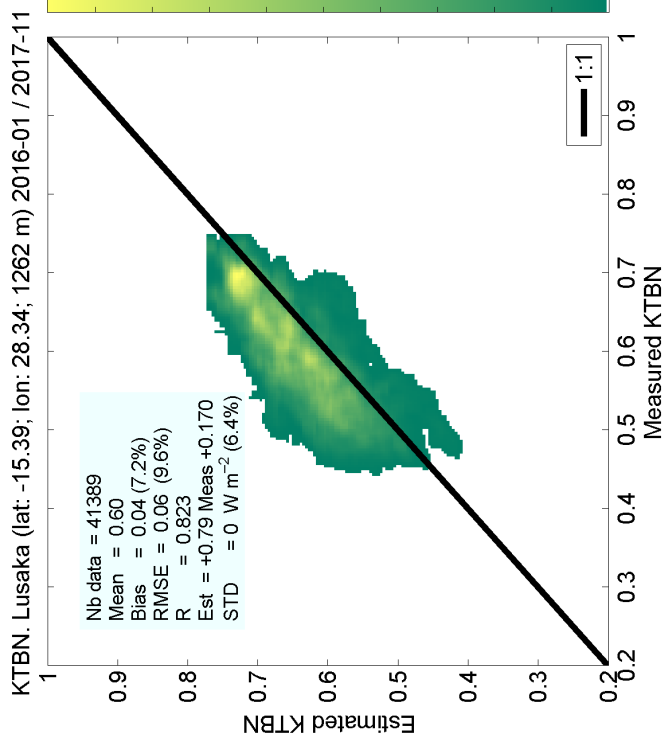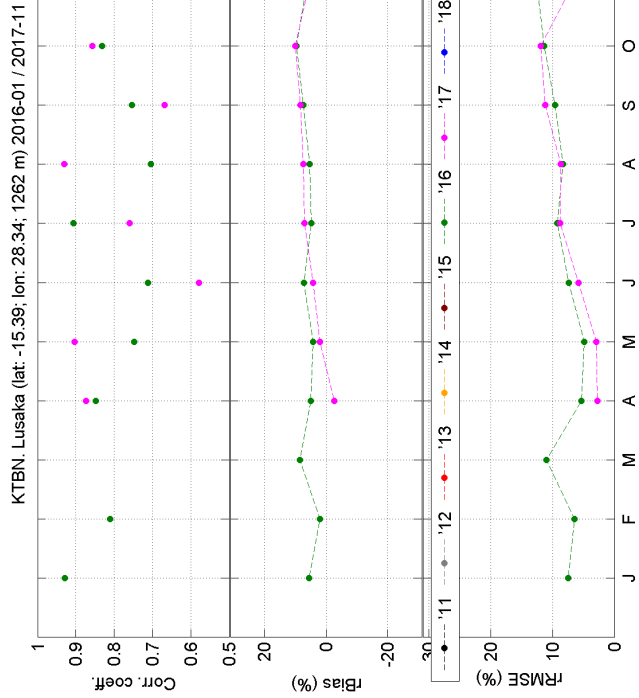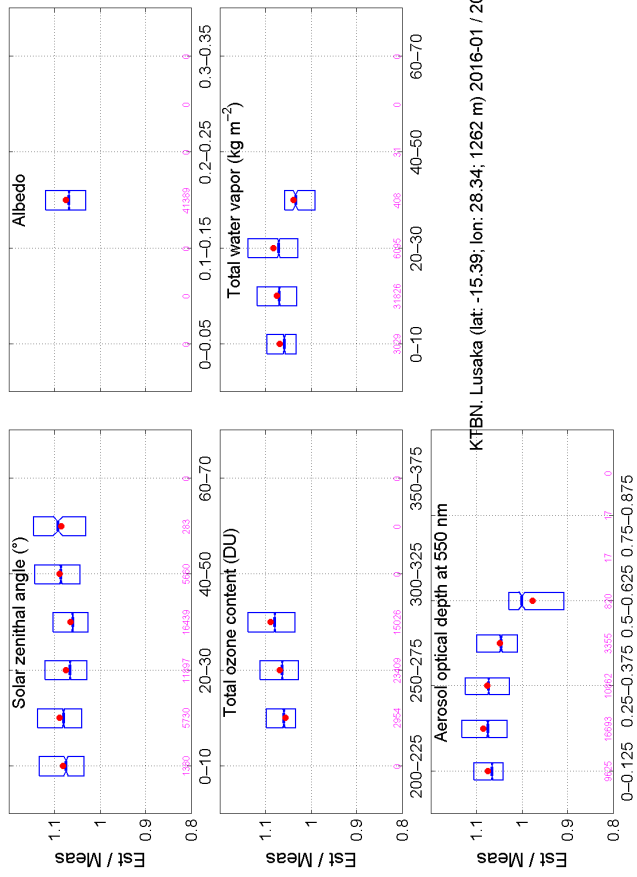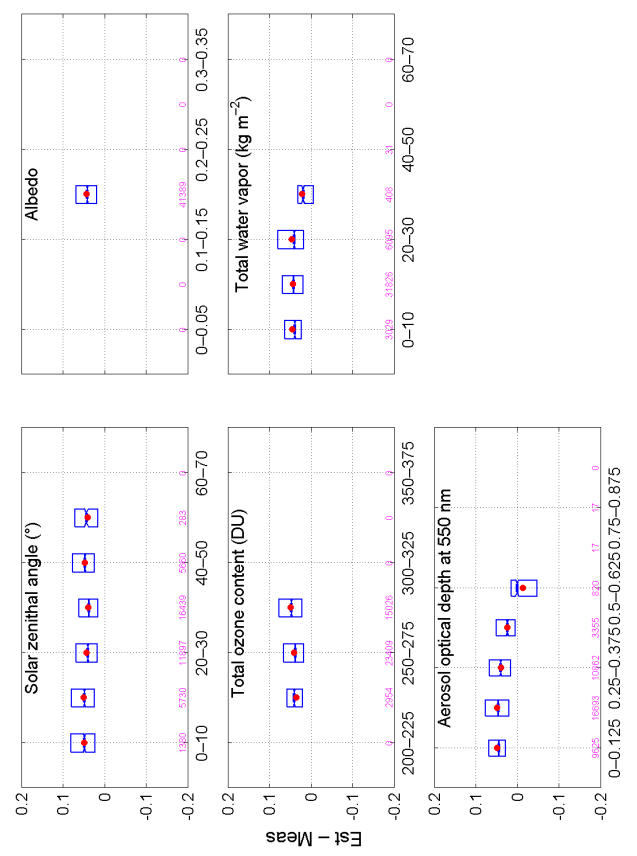

Figure S88: Comparison on direct clearness index at Lusaka

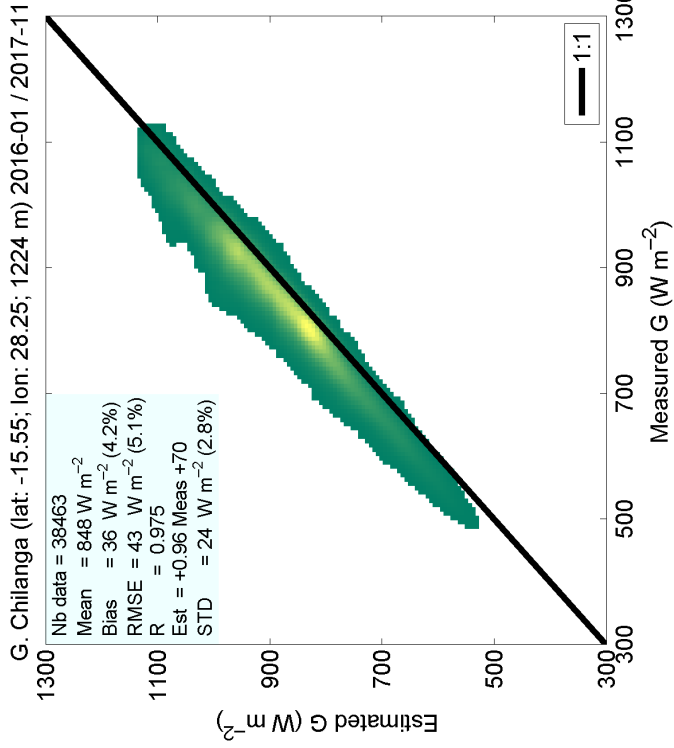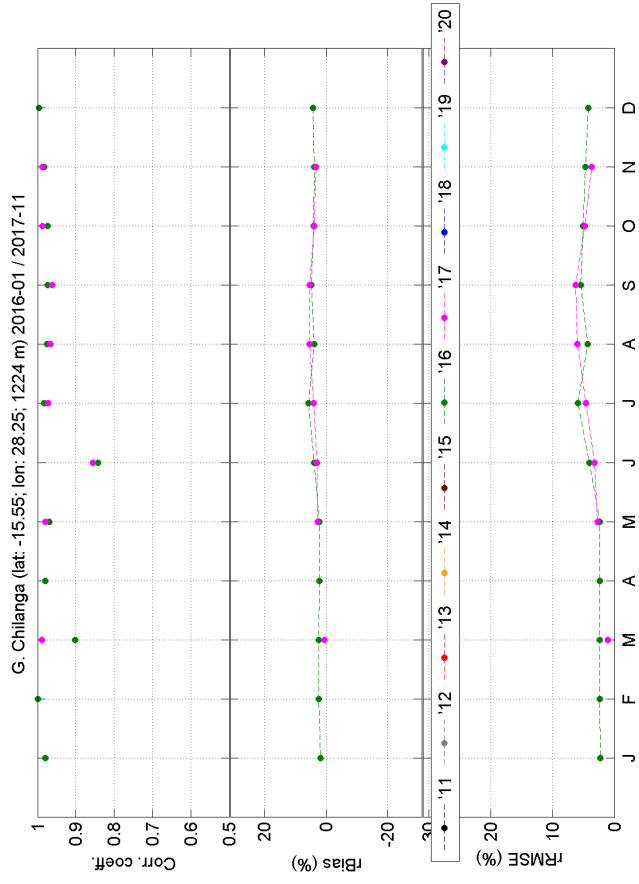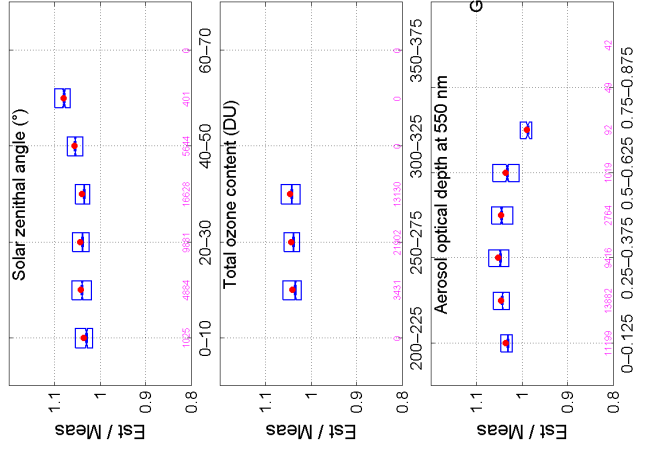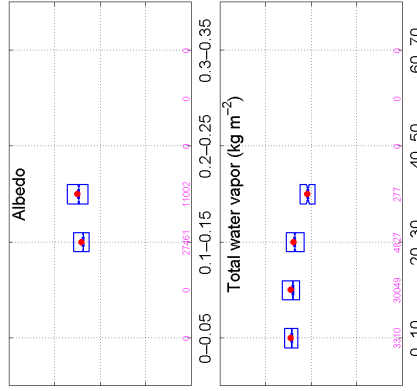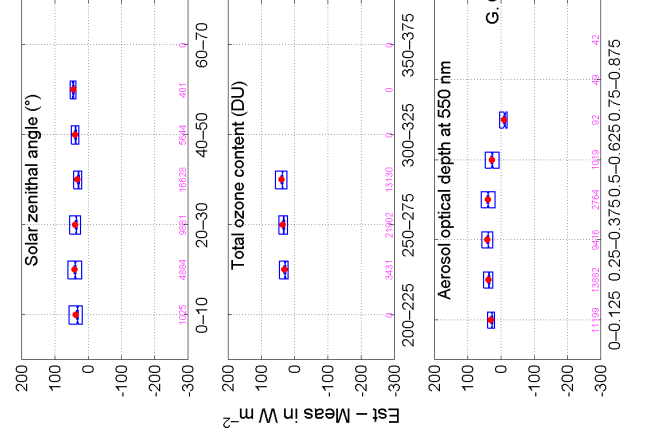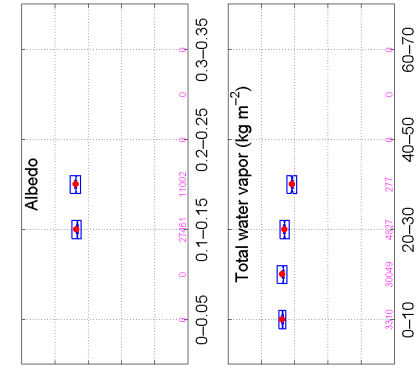

G. Chilianga (lat: -15.55; lon: 28.25; 1224 m) 2016-01 / 2017-11

G. Chilianga (lat: -15.55; lon: 28.25; 1224 m) 2016-01 / 2017-11

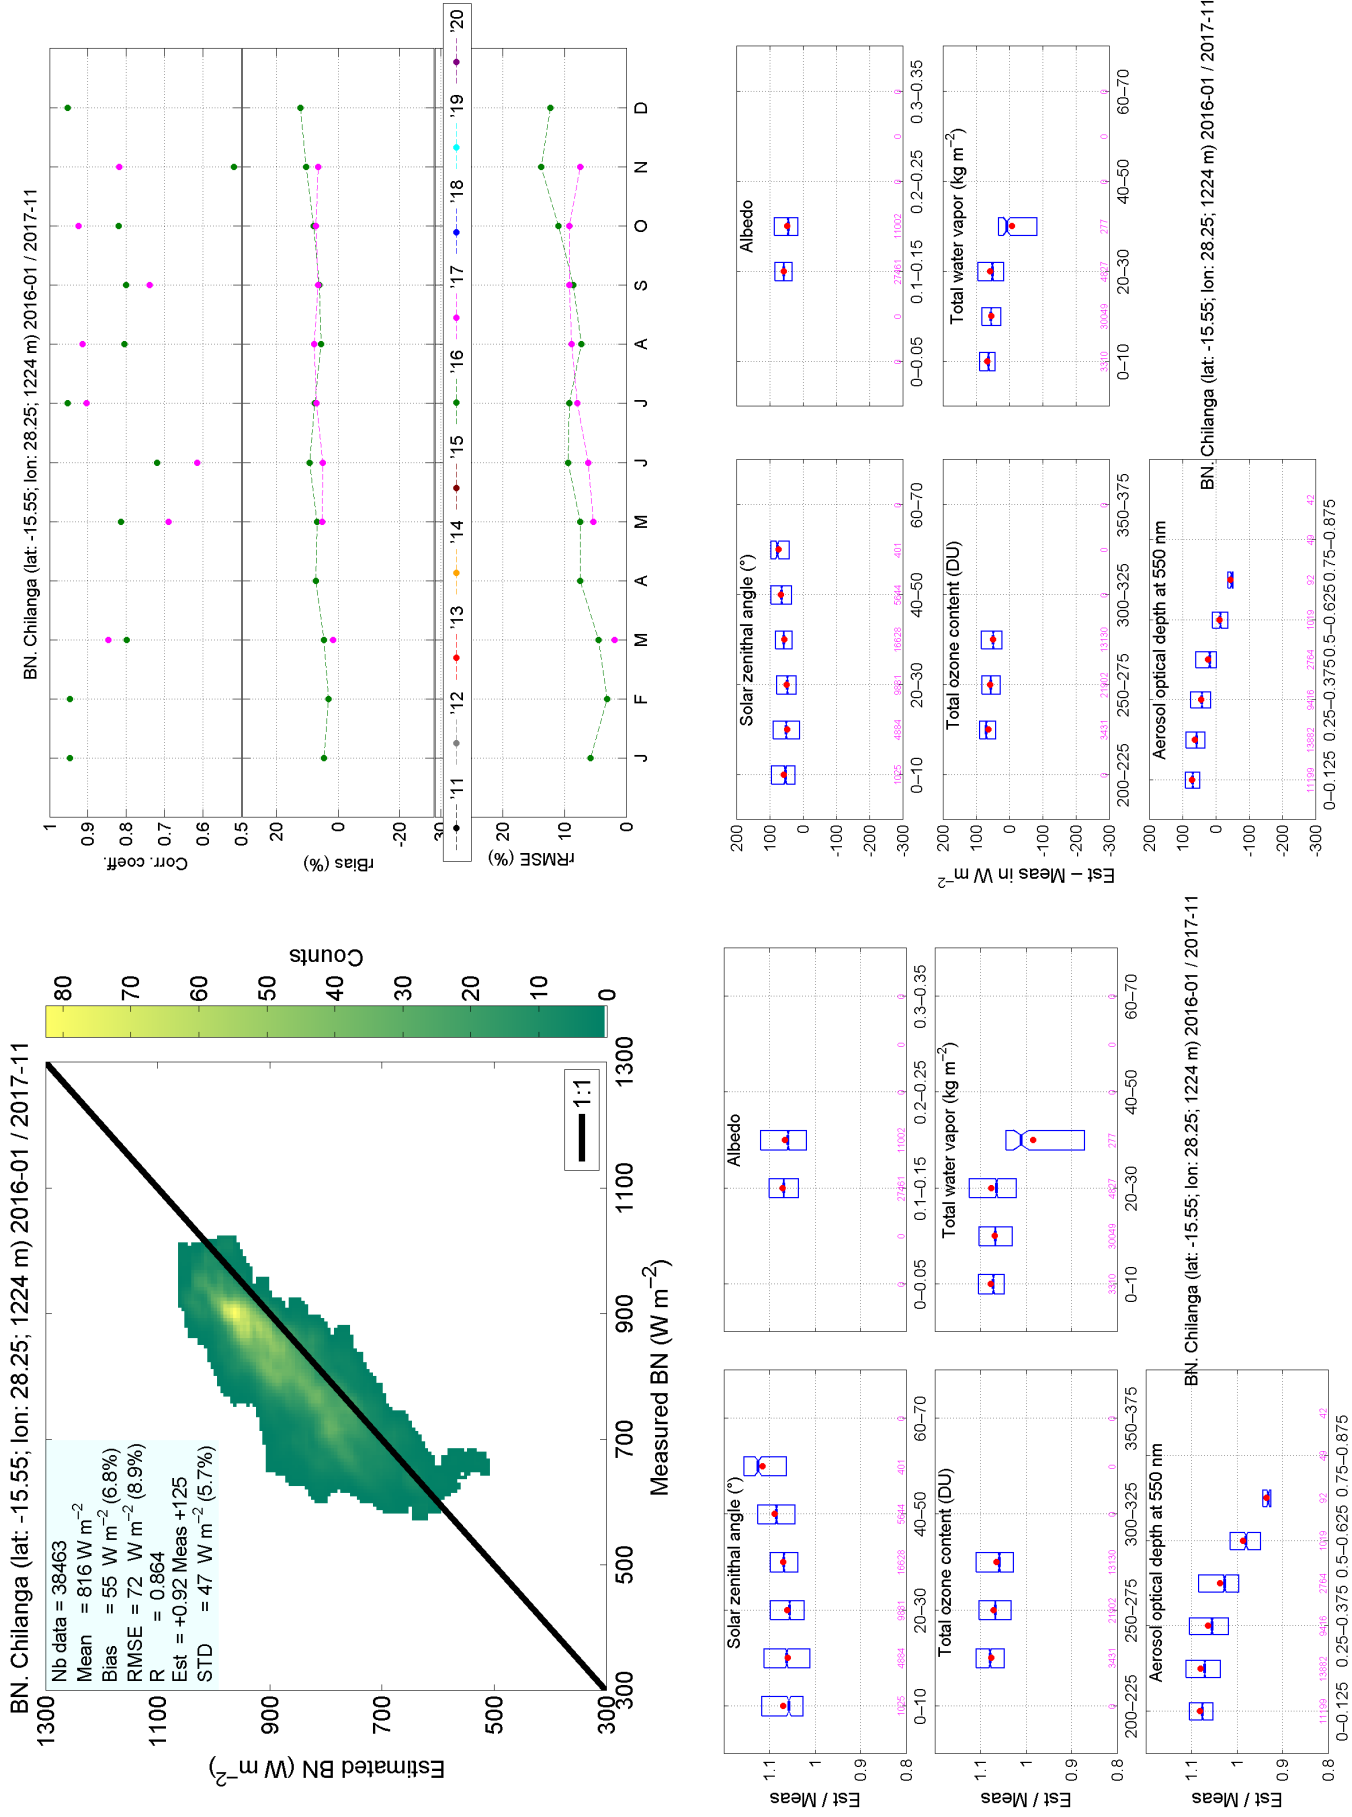

Figure S90: Comparison on direct component at normal irradiance at Chilanga

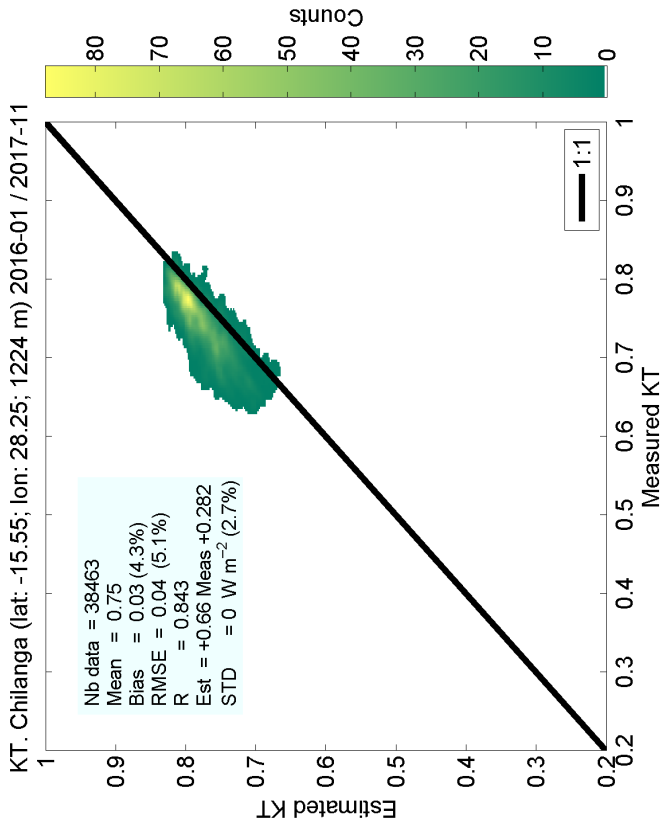

KT. Chilanga (lat: -15.55; lon: 28.25; 1224 m) 2016-01 / 2017-11

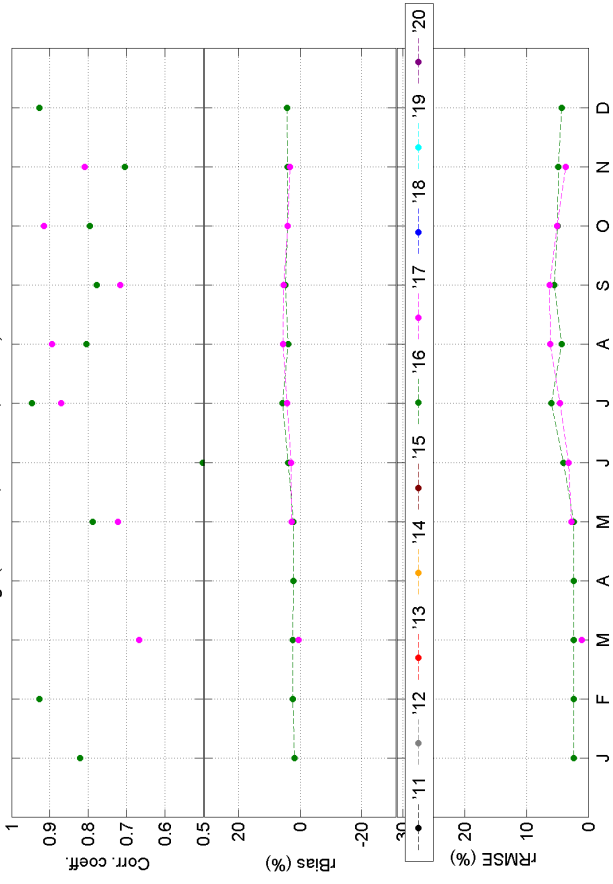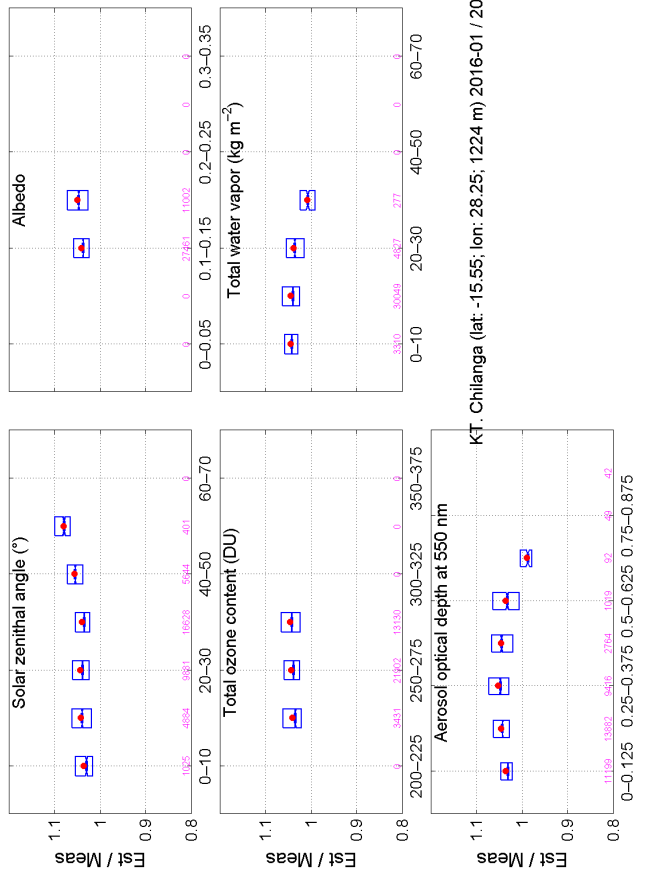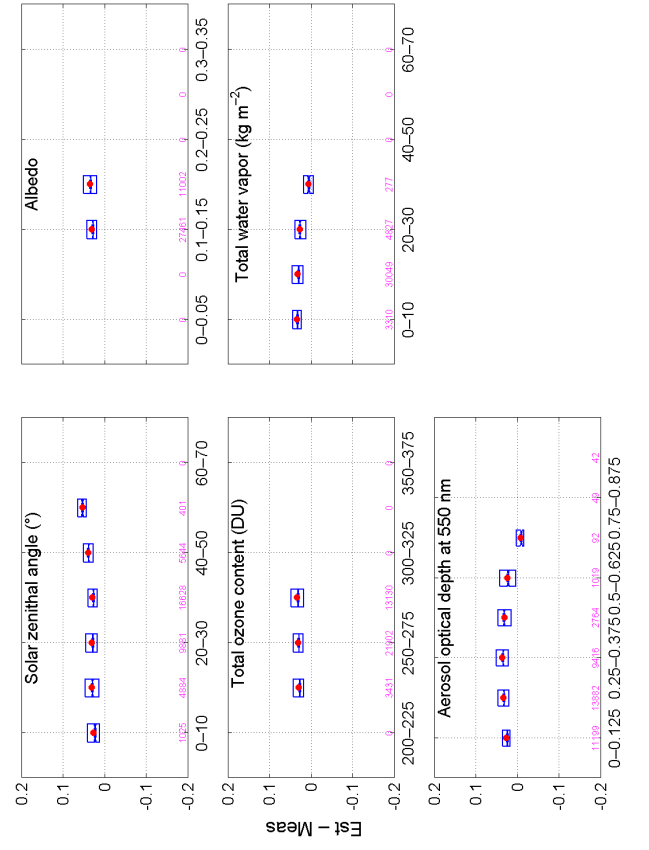

Figure S91: Comparison on clearness index at Chilanga

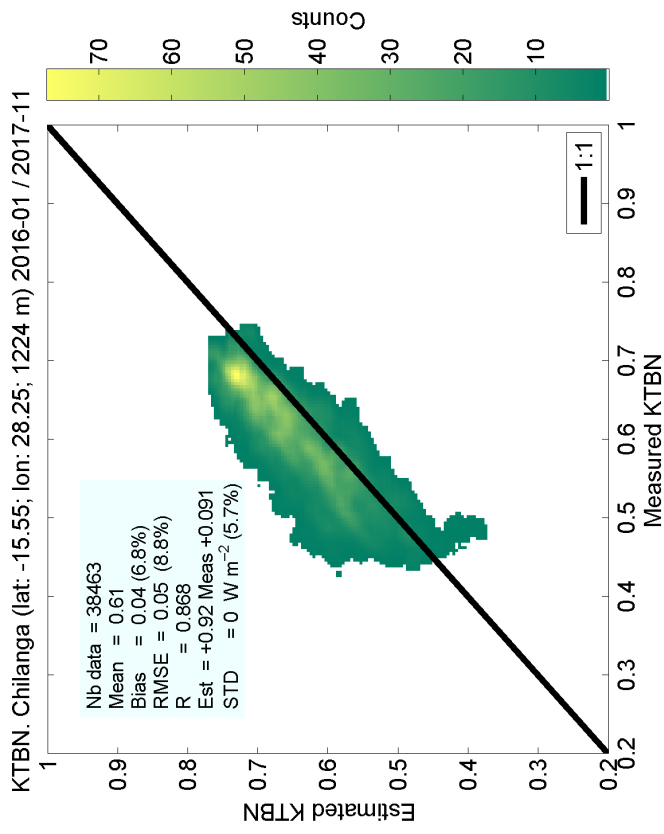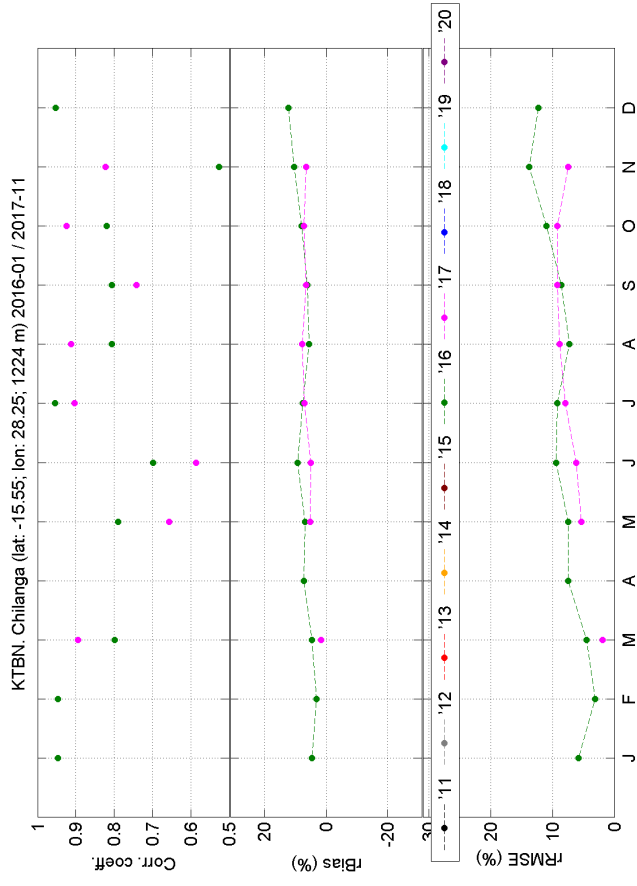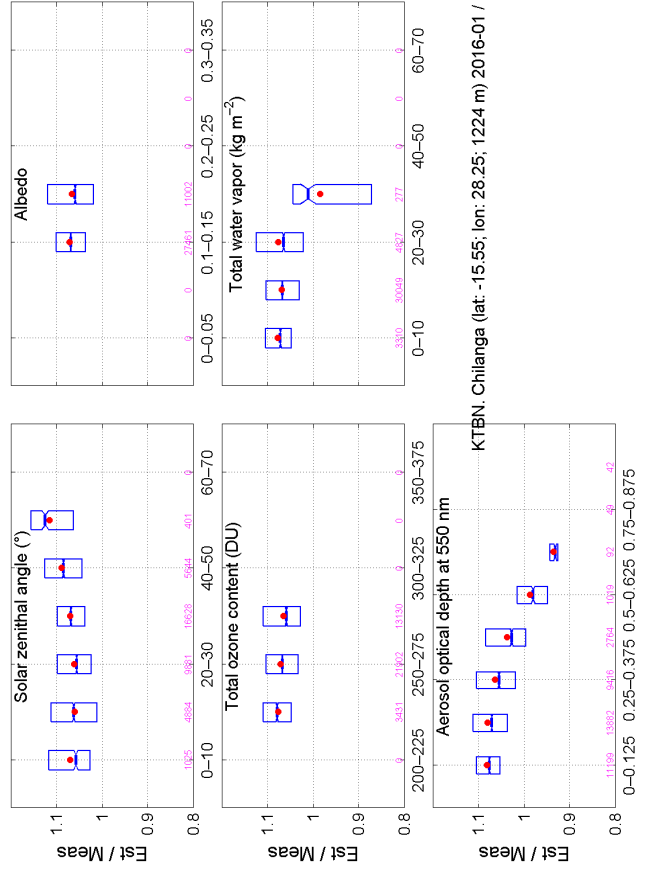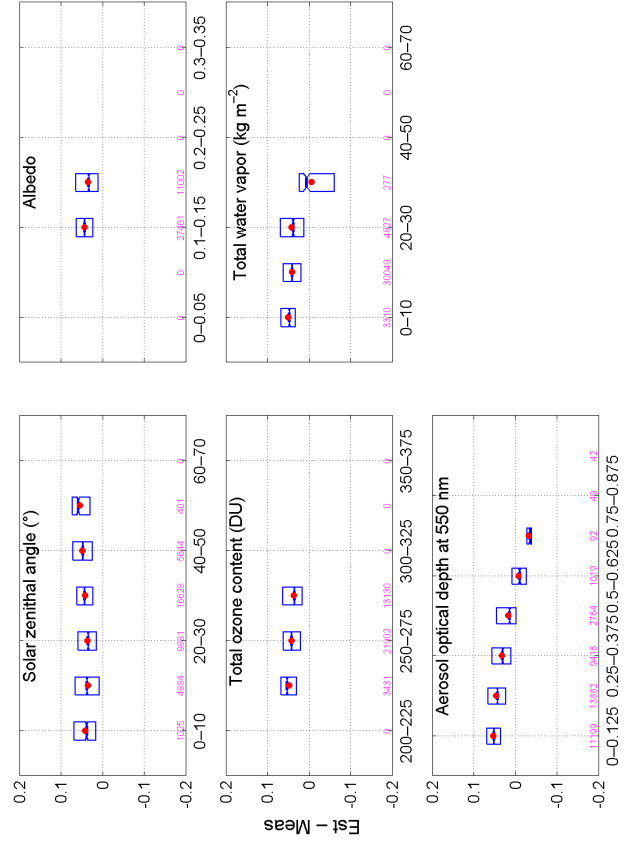

Figure S92: Comparison on direct clearness index at Chilanga

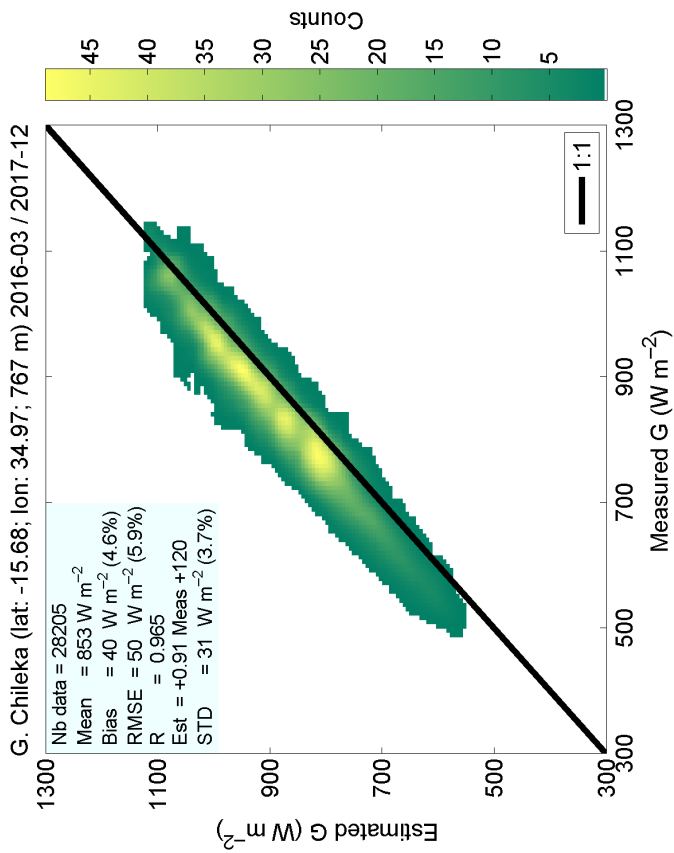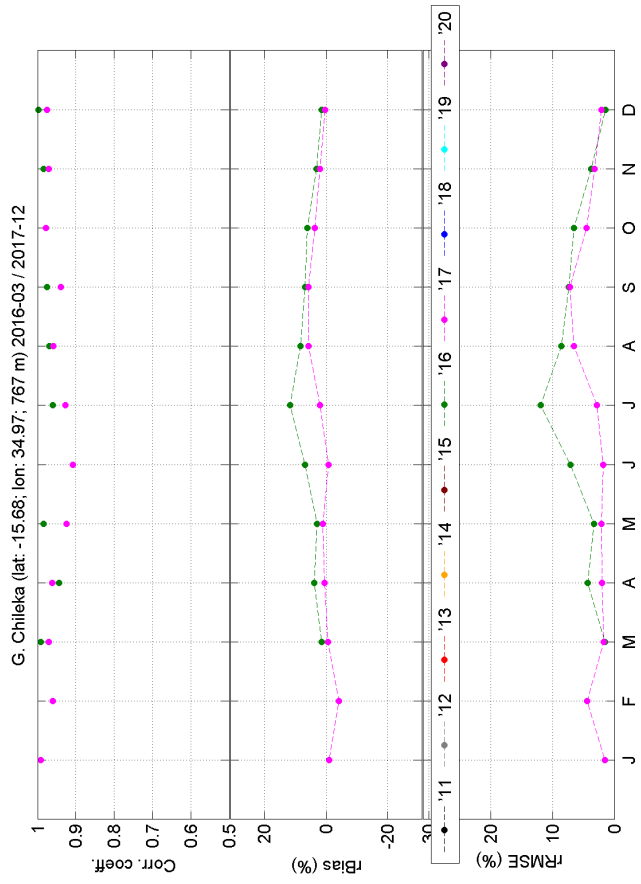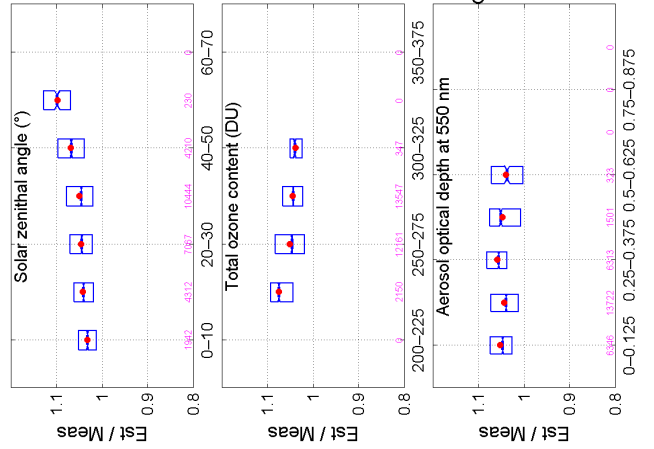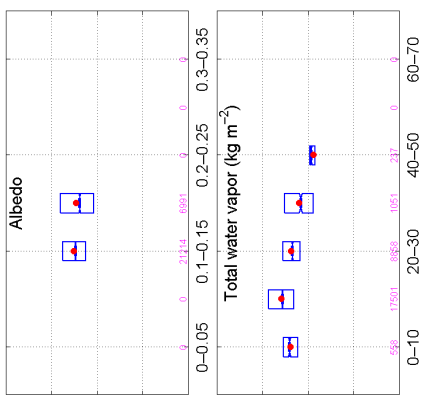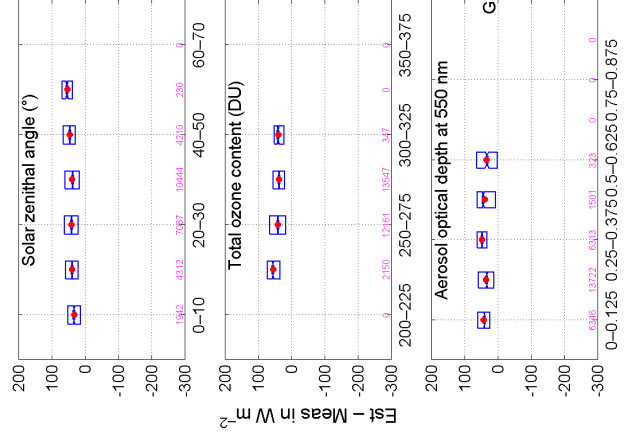

G. Chileka (lat: -15.68; lon: 34.97; 767 m) 2016-03 / 2017-12

Figure S93: Comparison on global irradiance at Chileka

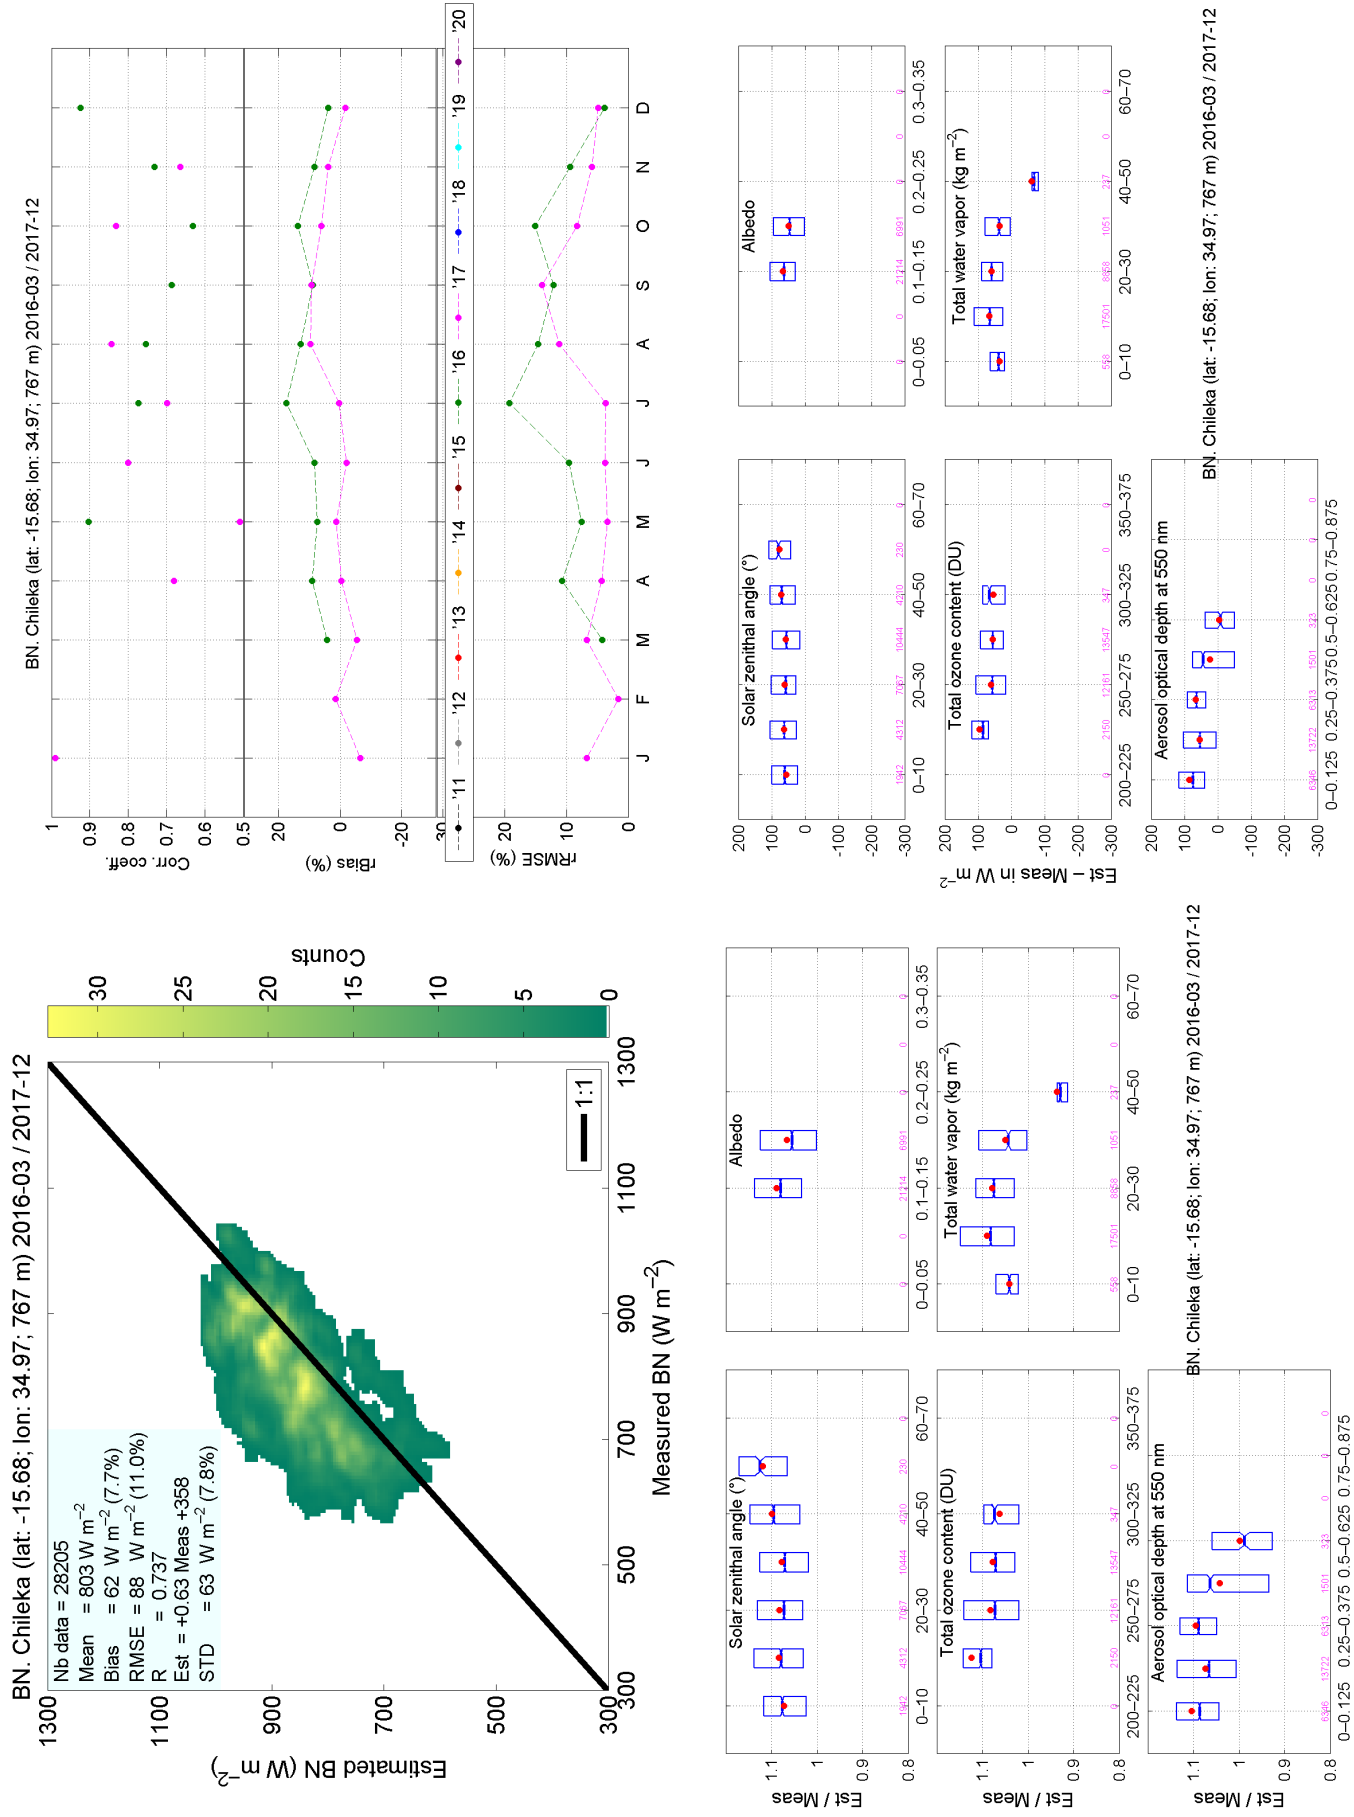

Figure S94: Comparison on direct component at normal irradiance at Chileka



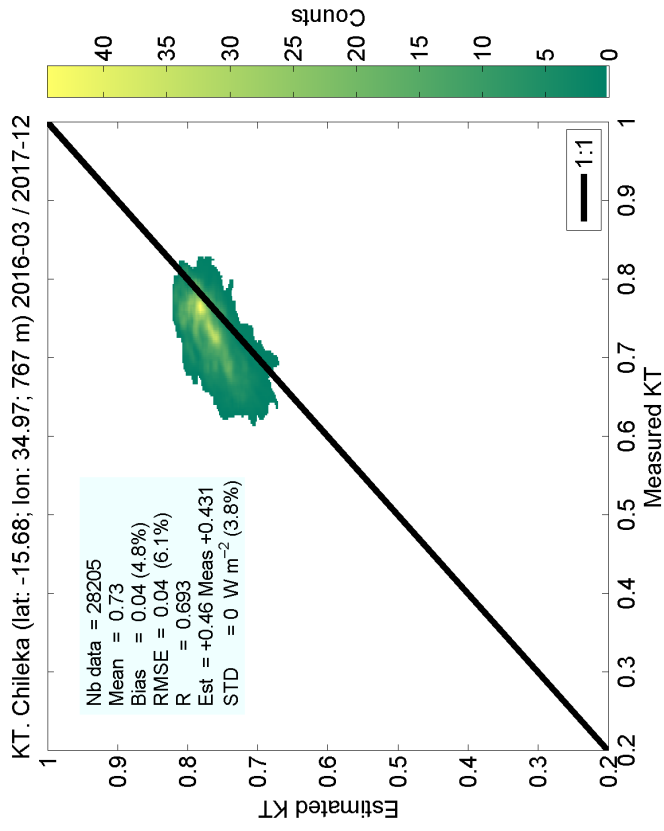

KT, Chileka (lat: -15.68; lon: 34.97; 767 m) 2016-03 / 2017-12

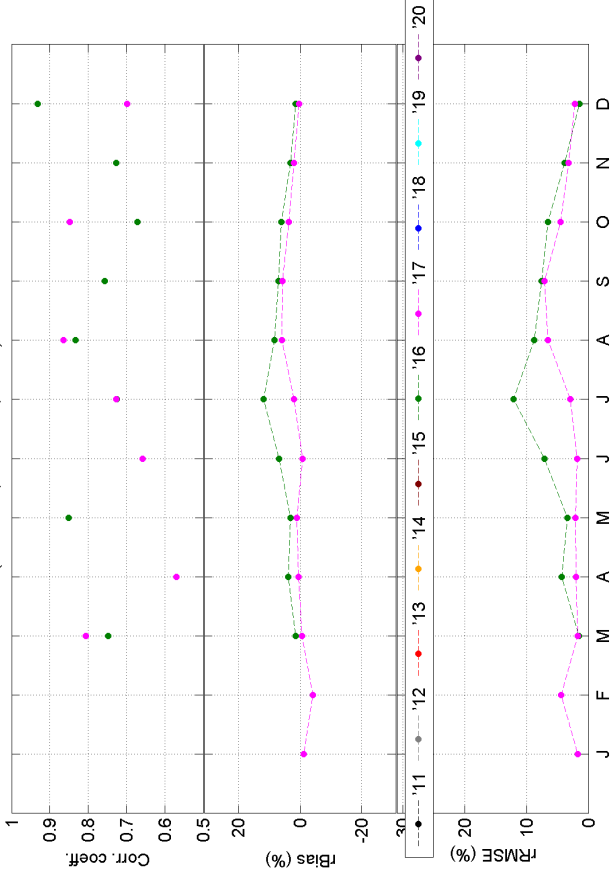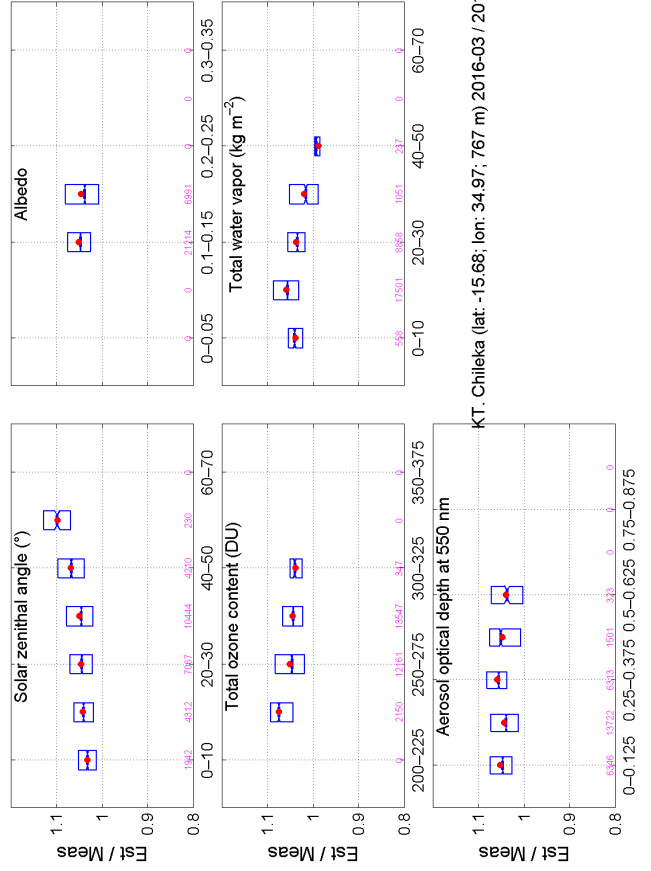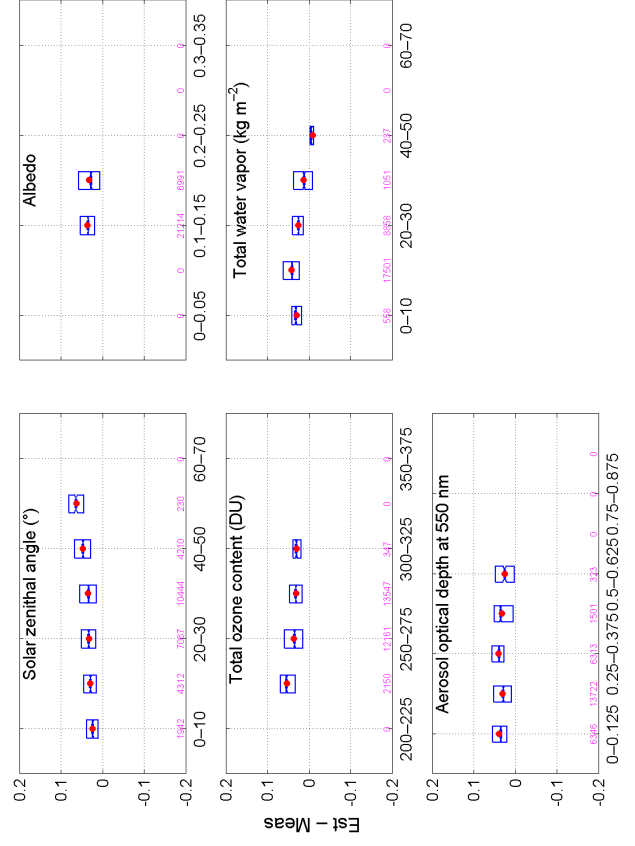

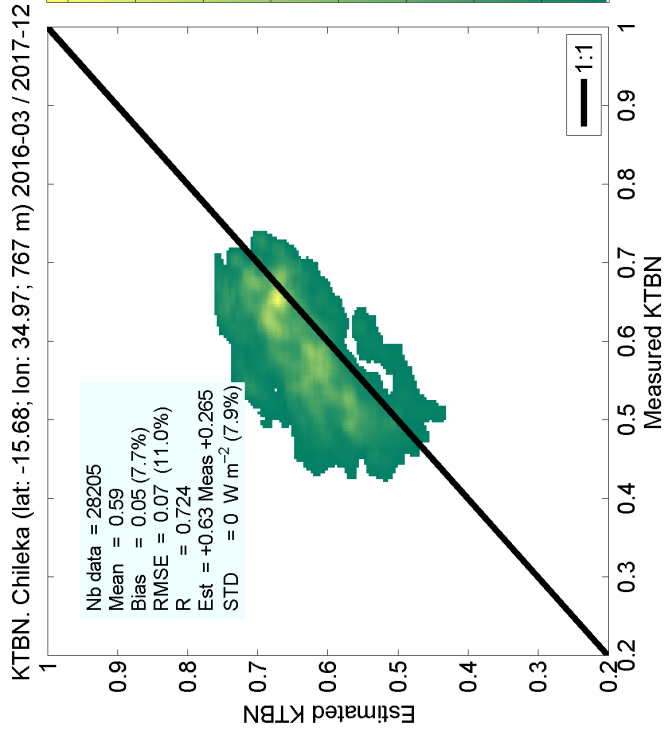

KTBN, Chileka (lat: -15.68; lon: 34.97; 767 m) 2016-03 / 2017-12

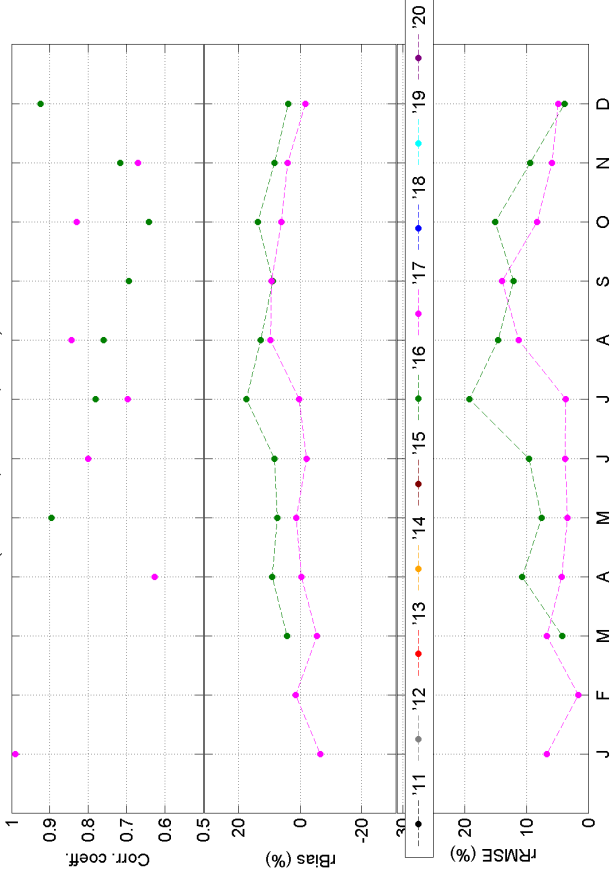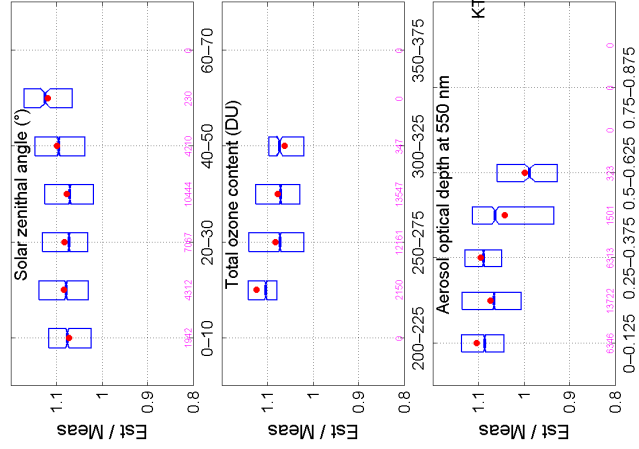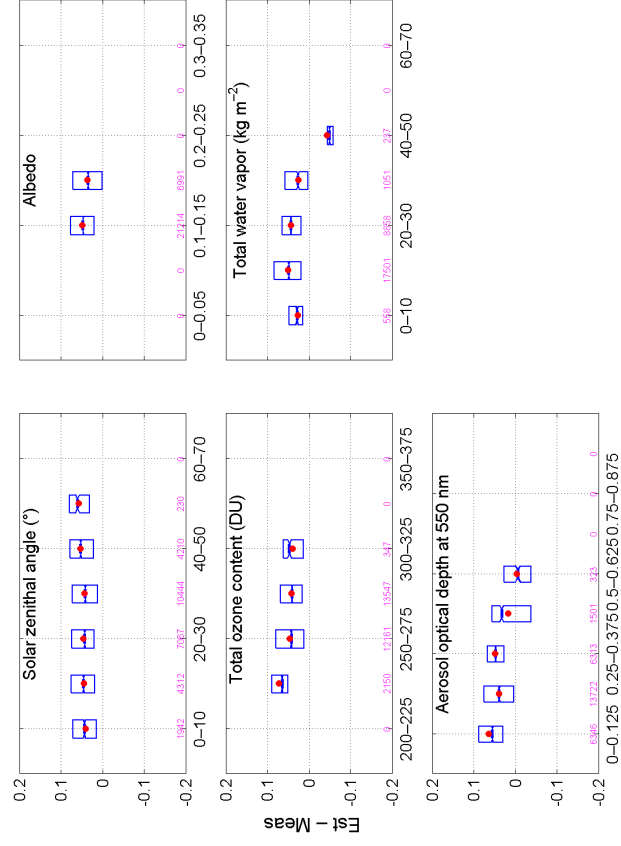

Figure S96: Comparison on direct clearness index at Chileka

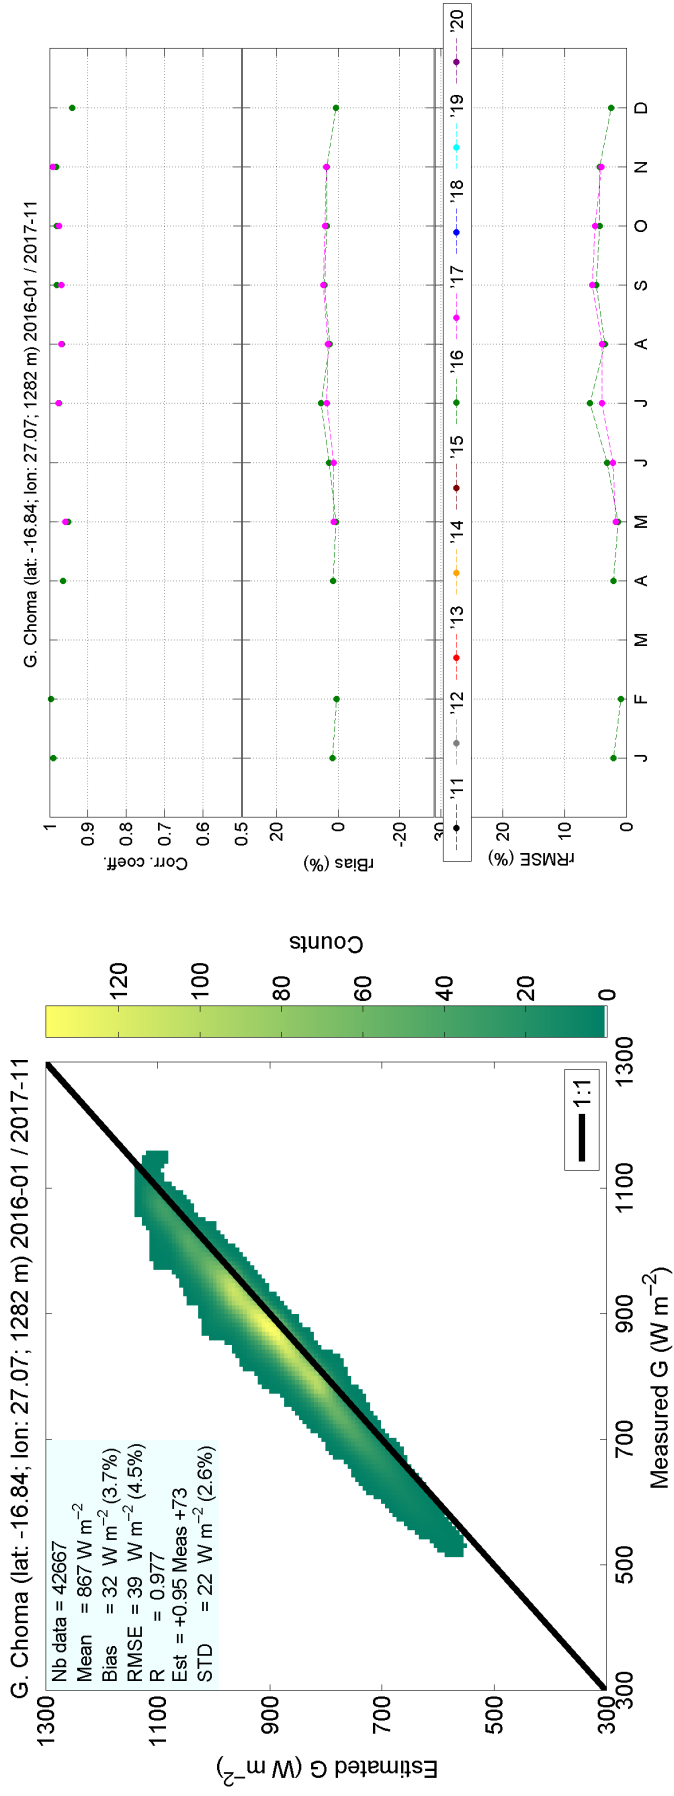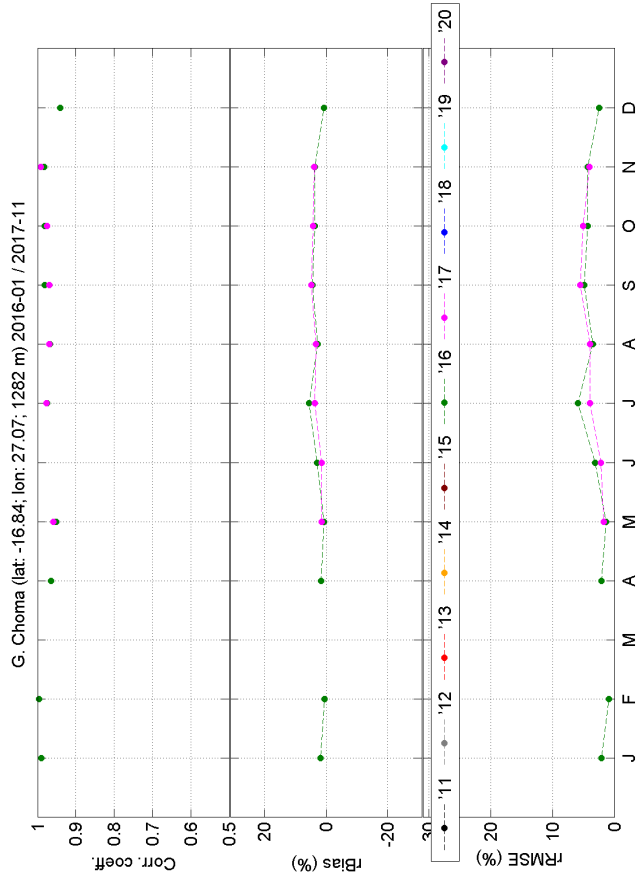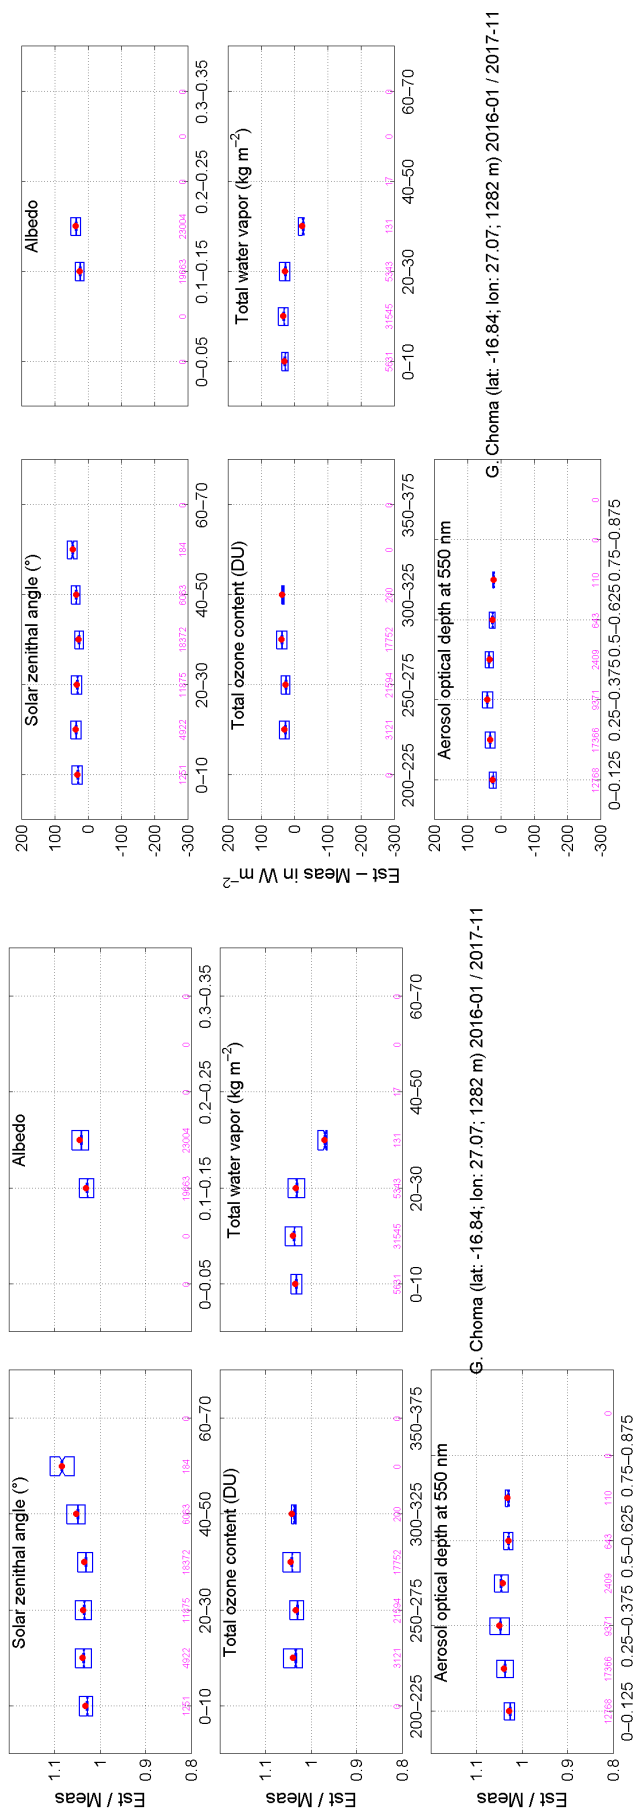

Figure S97: Comparison on global irradiance at Choma

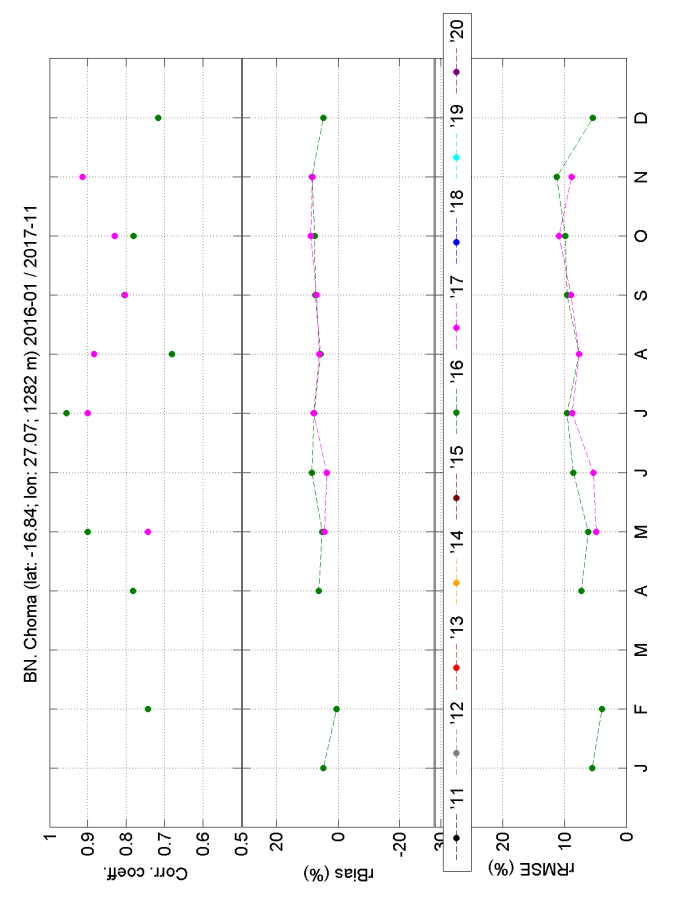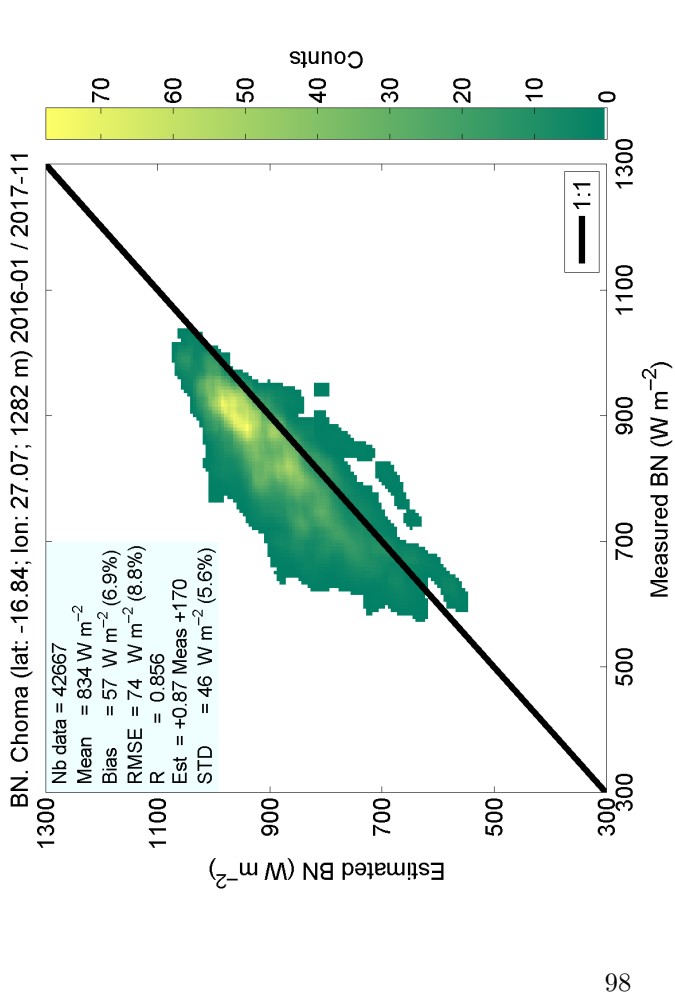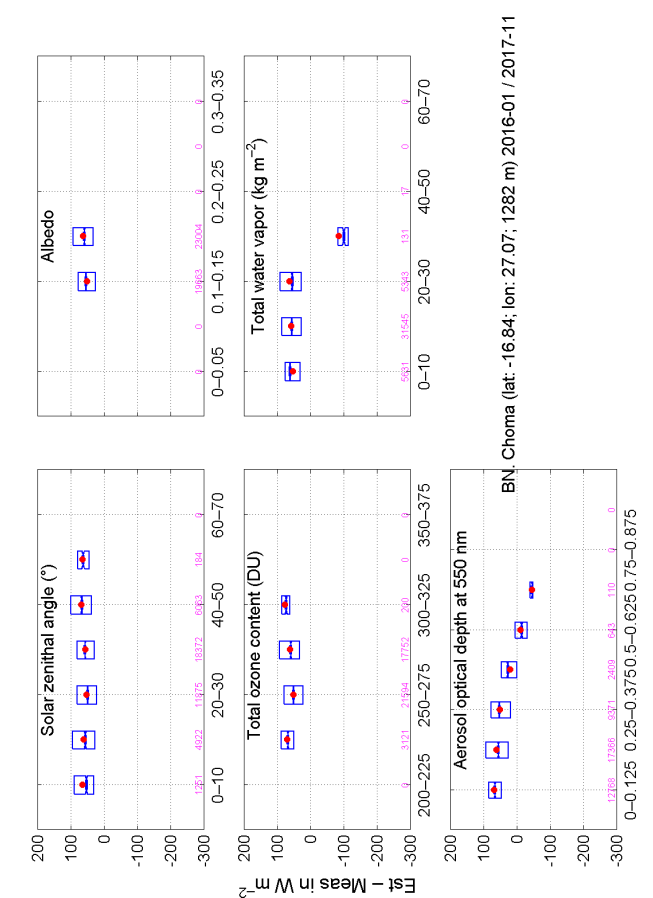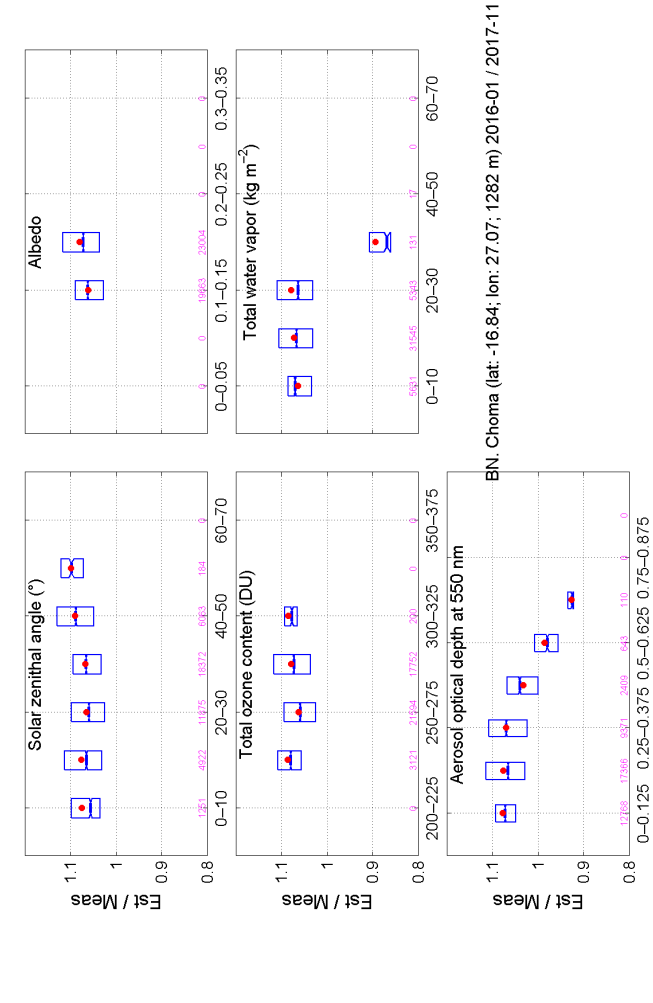

Figure S98: Comparison on direct component at normal irradiance at Choma

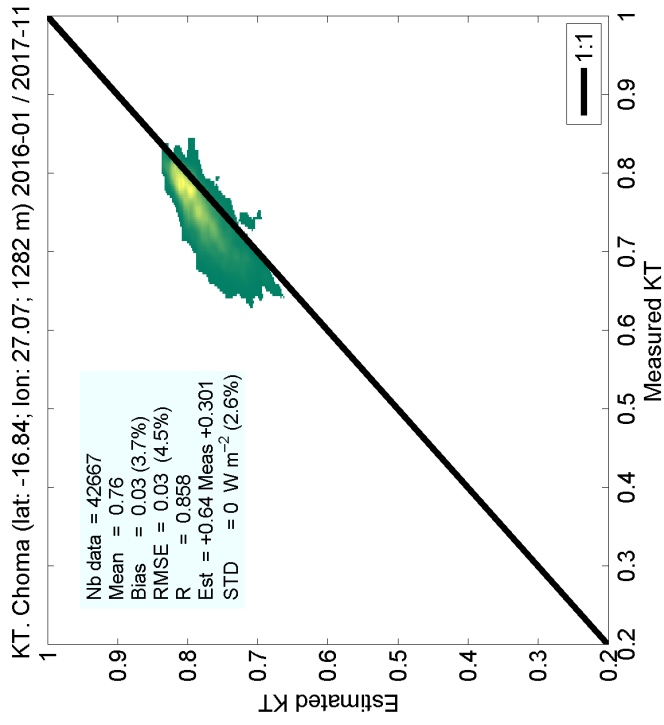

KT. Choma (lat: -16.84; lon: 27.07; 1282 m) 2016-01 / 2017-11

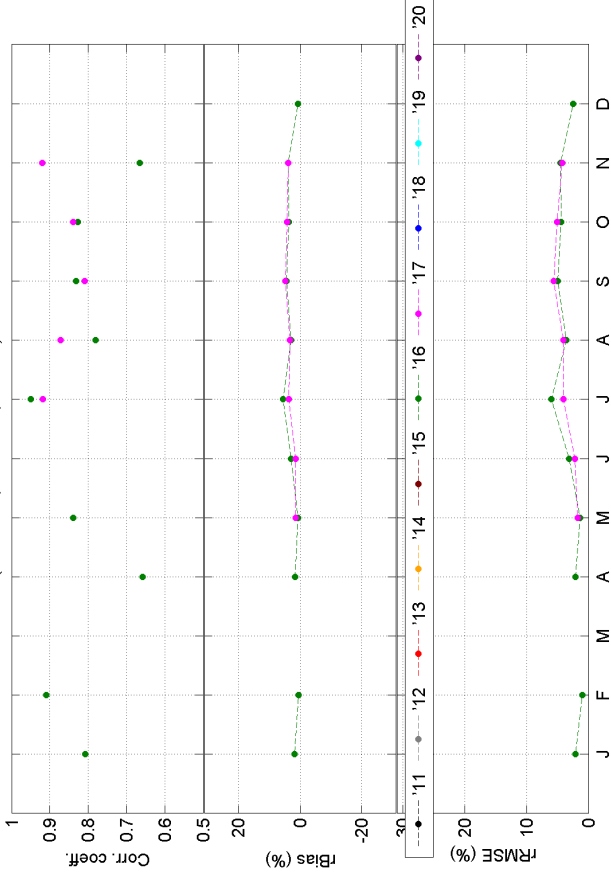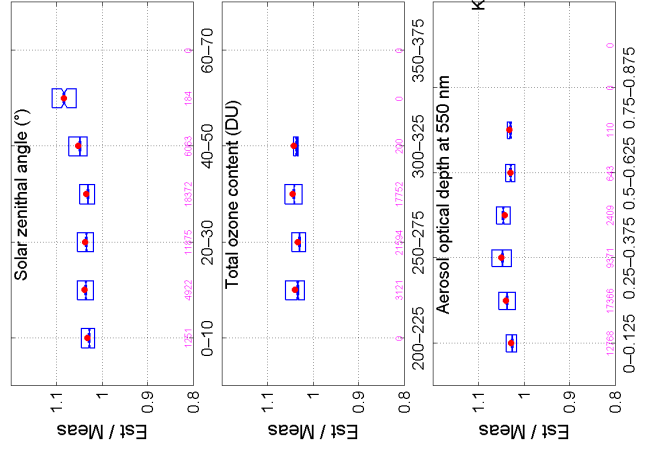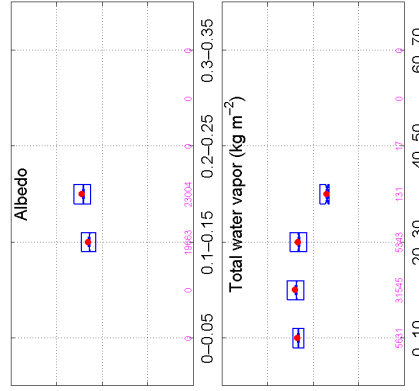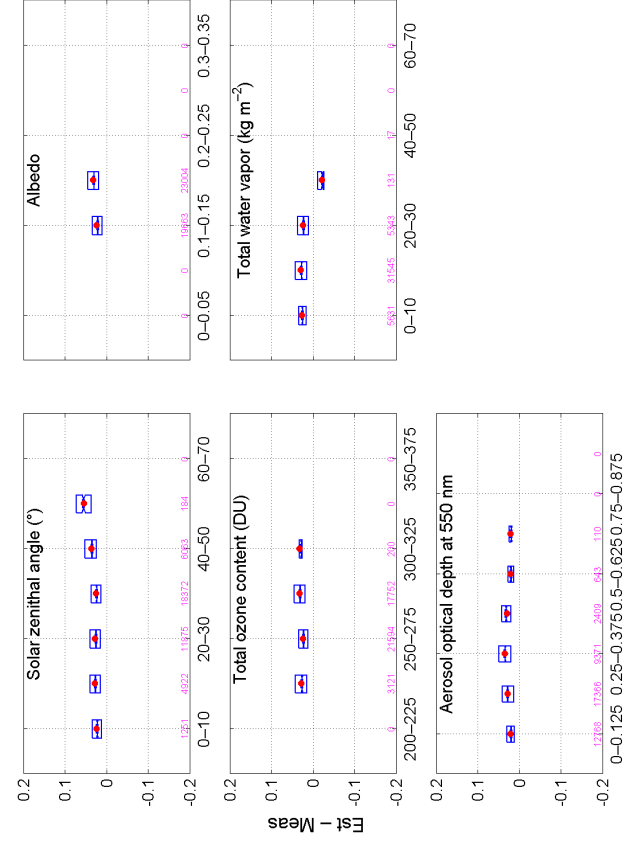

Figure S99: Comparison on clearness index at Choma

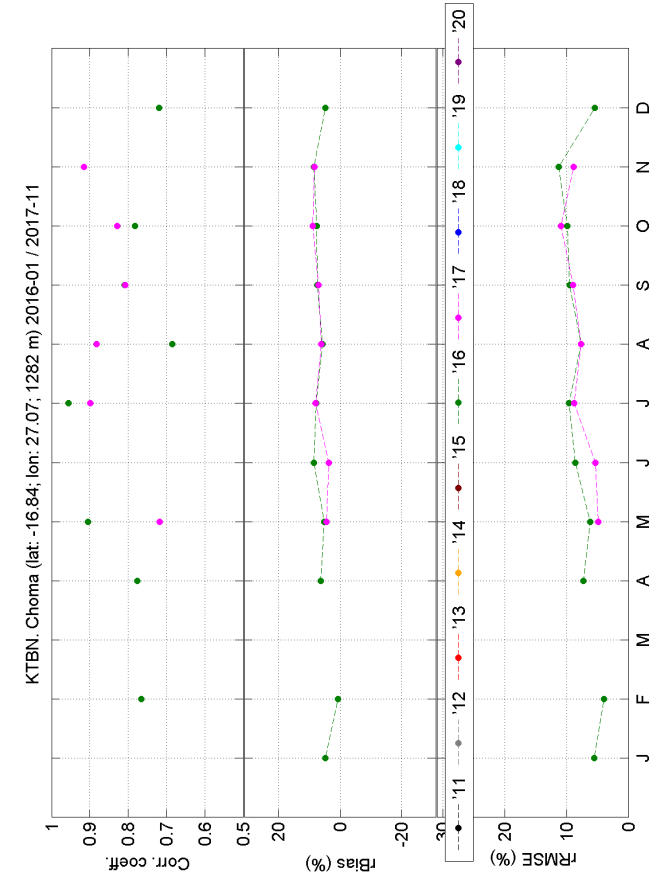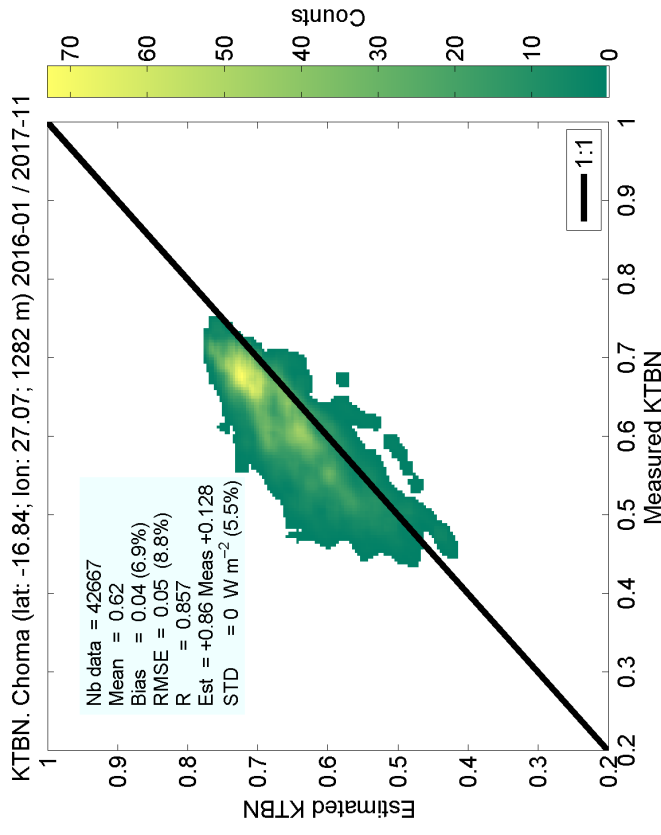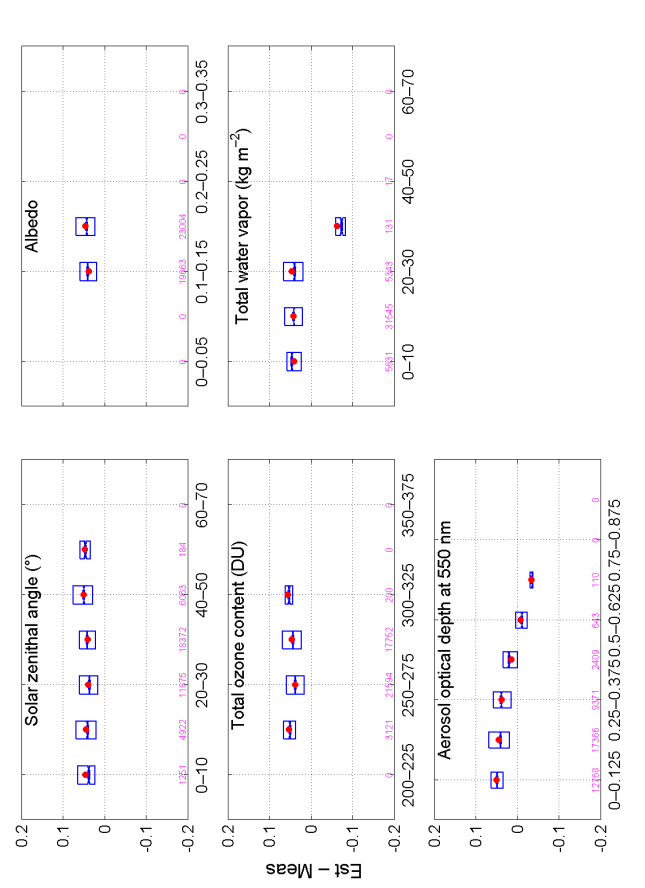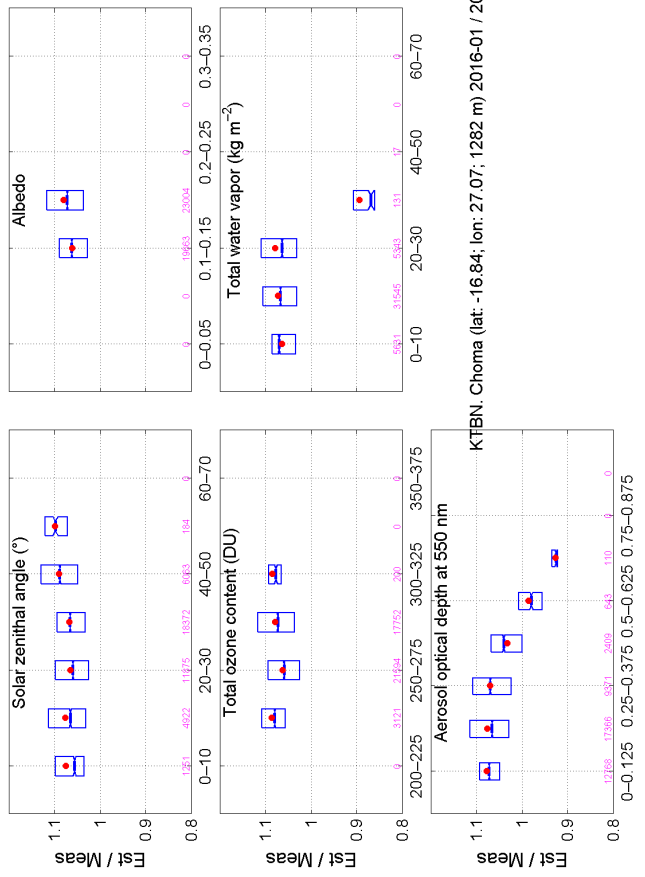

Figure S100: Comparison on direct clearness index at Choma

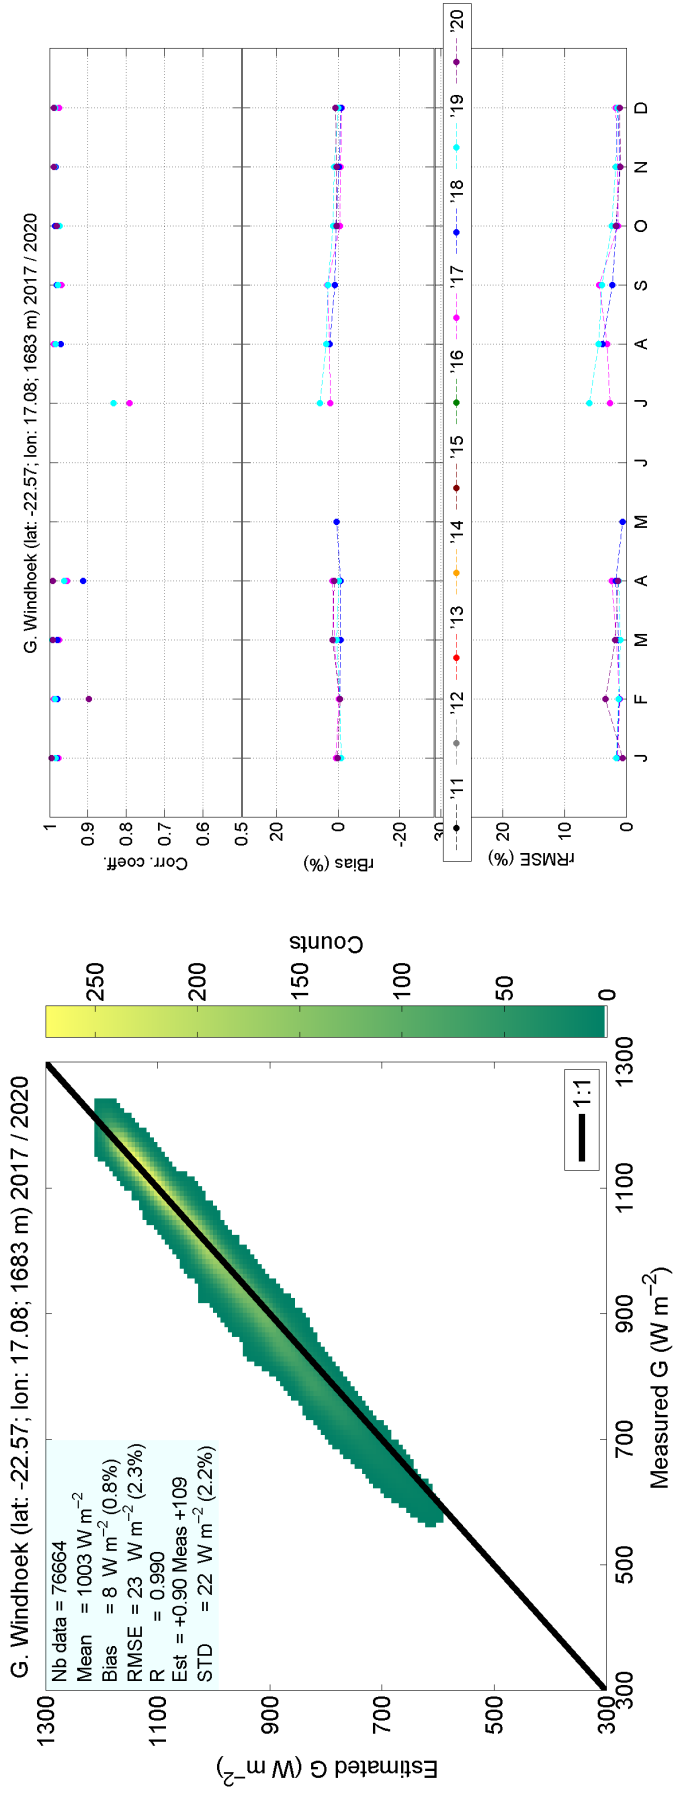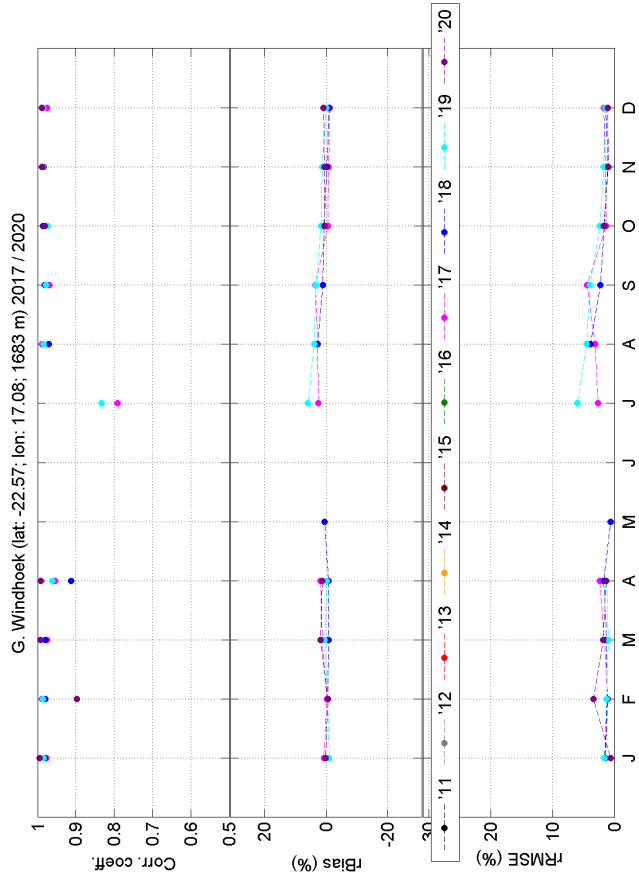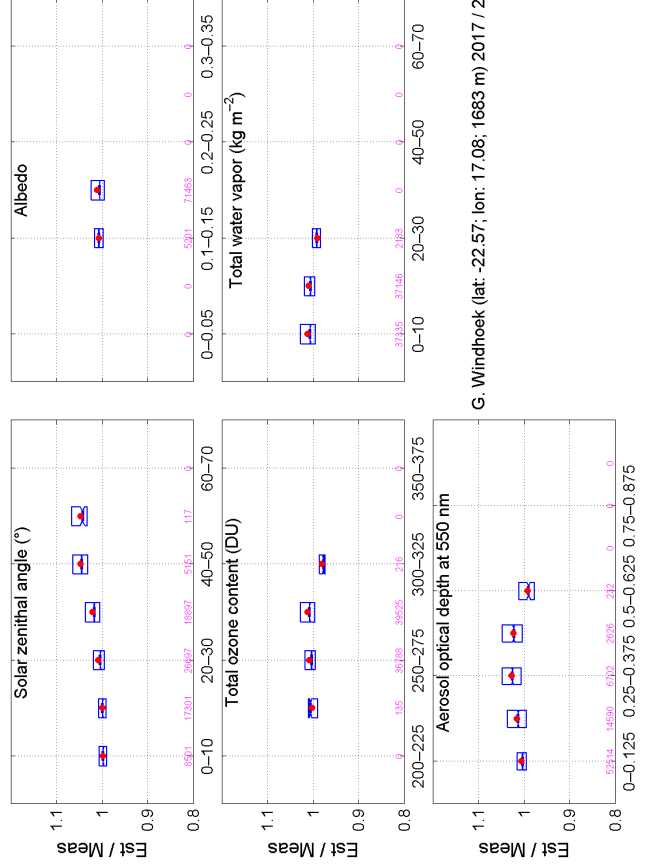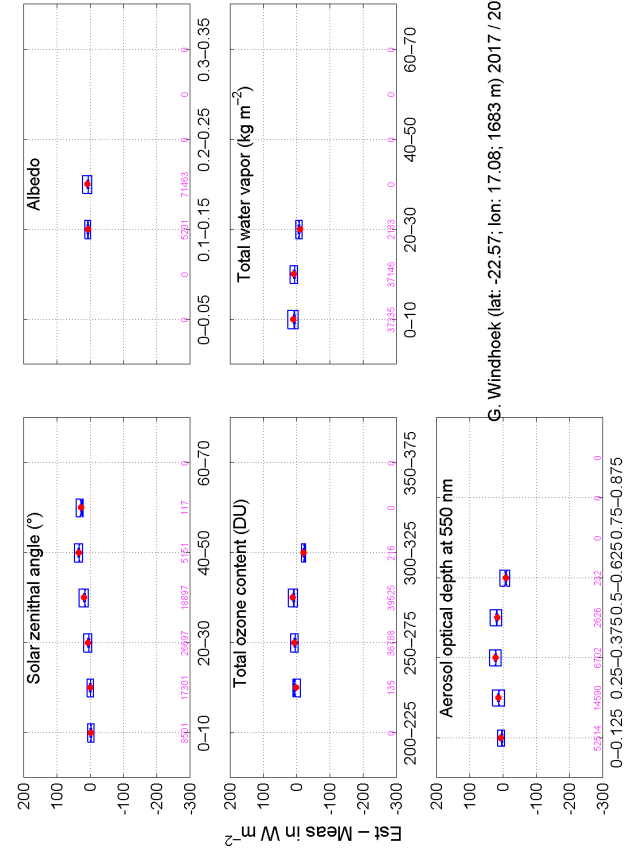

Figure S101: Comparison on global irradiance at Windhoek

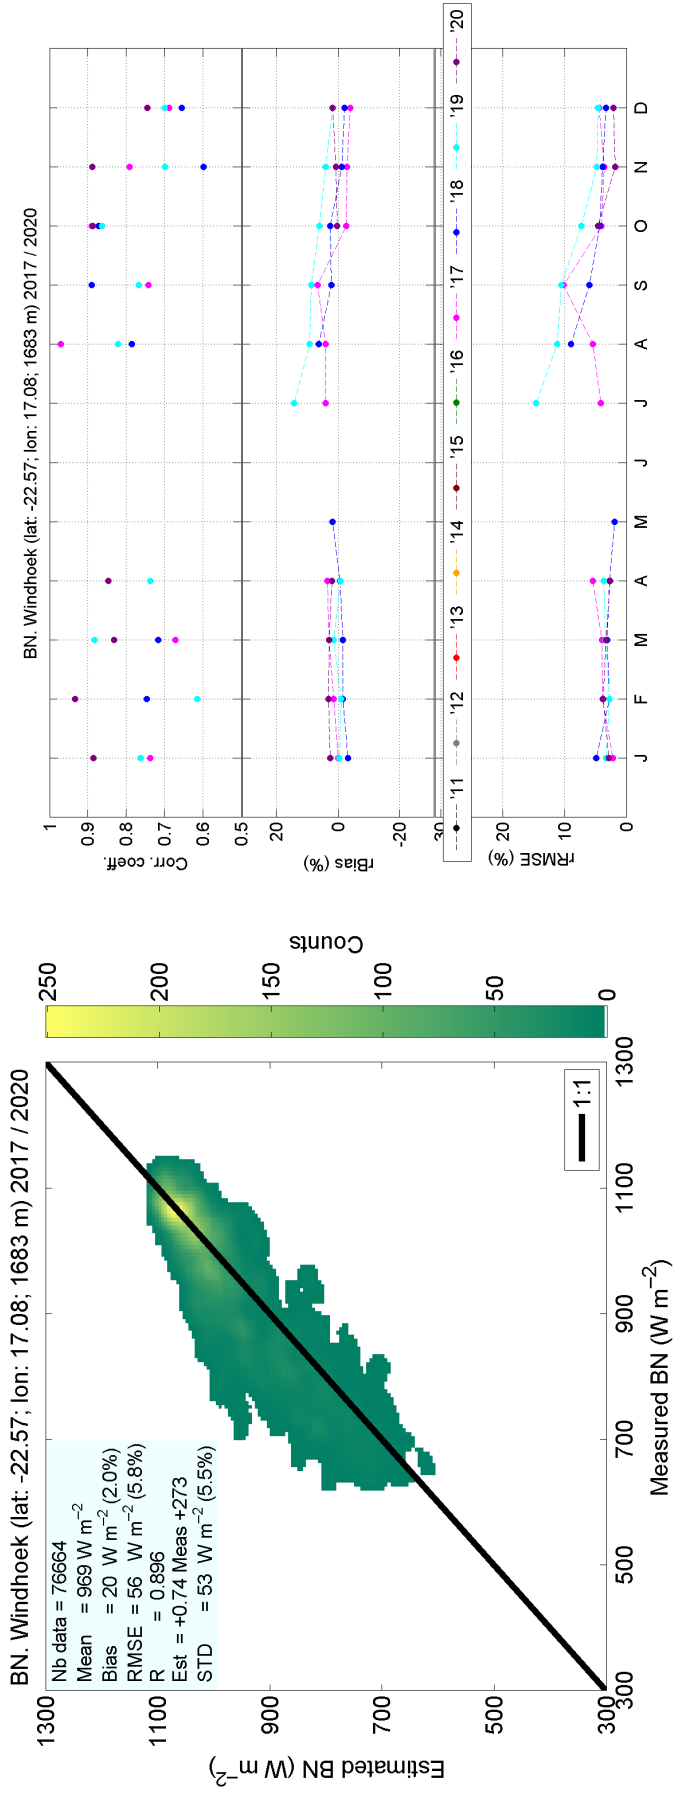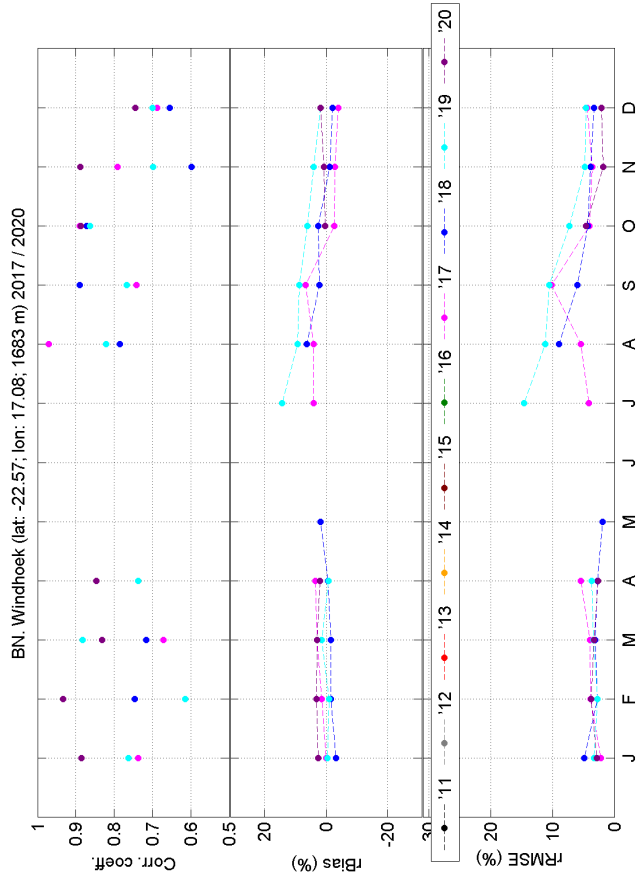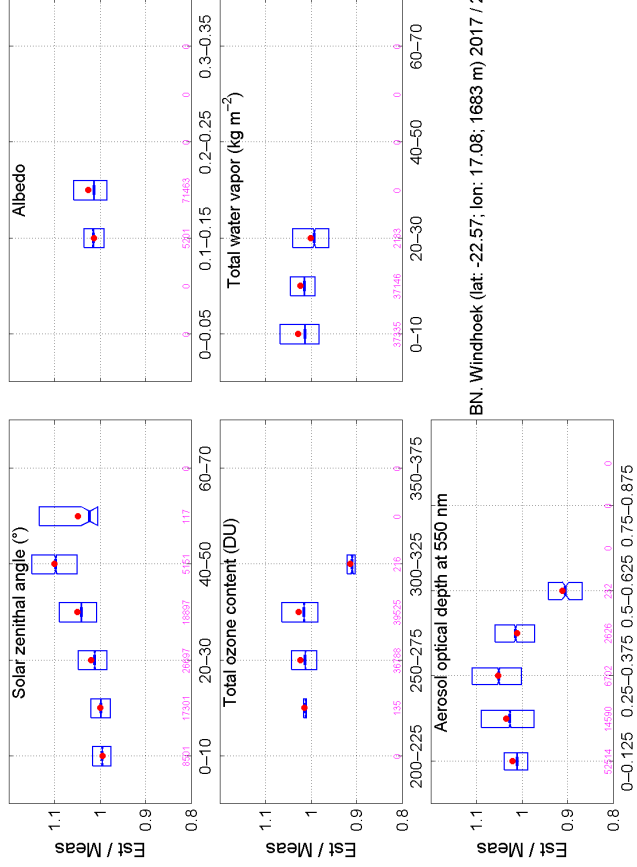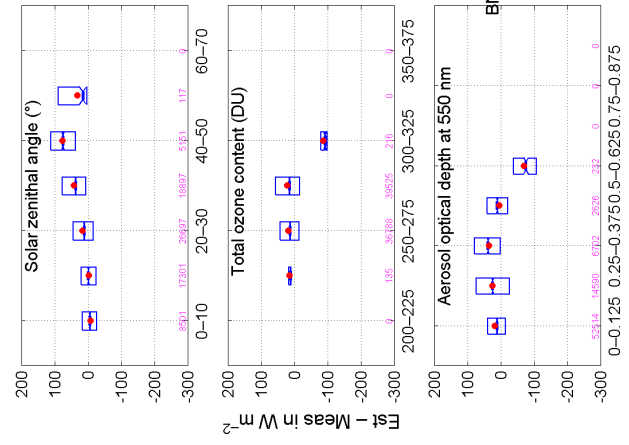

Figure S102: Comparison on direct component at normal irradiance at Windhoek



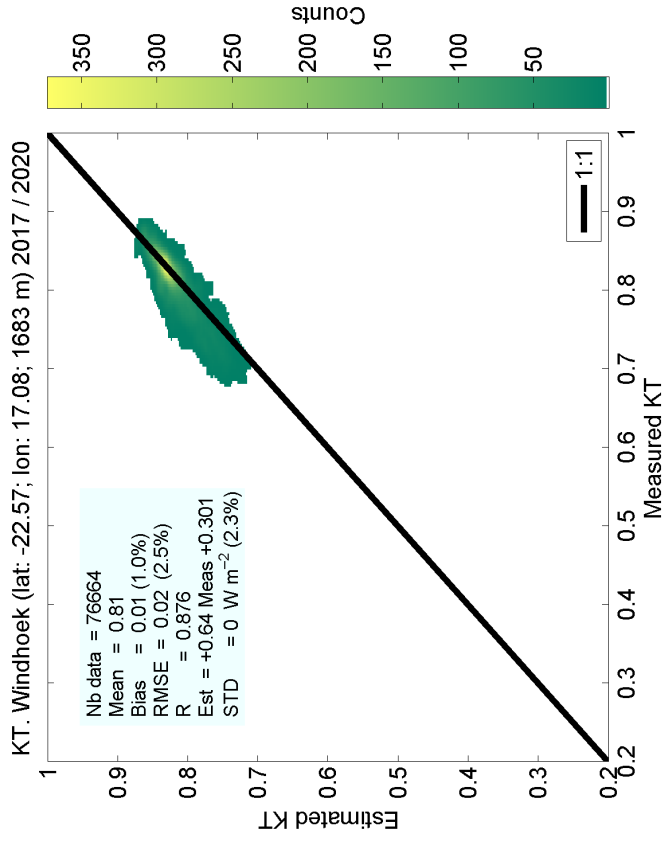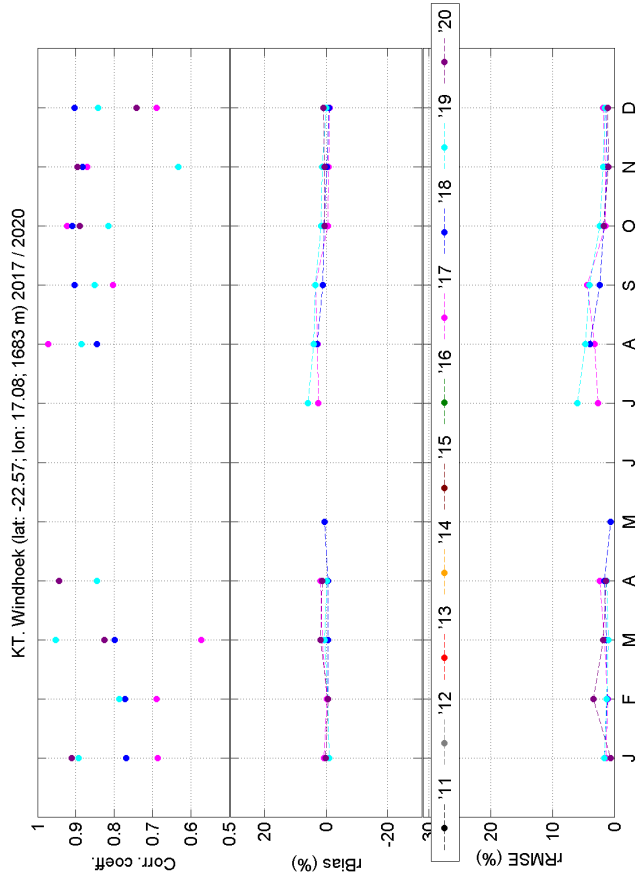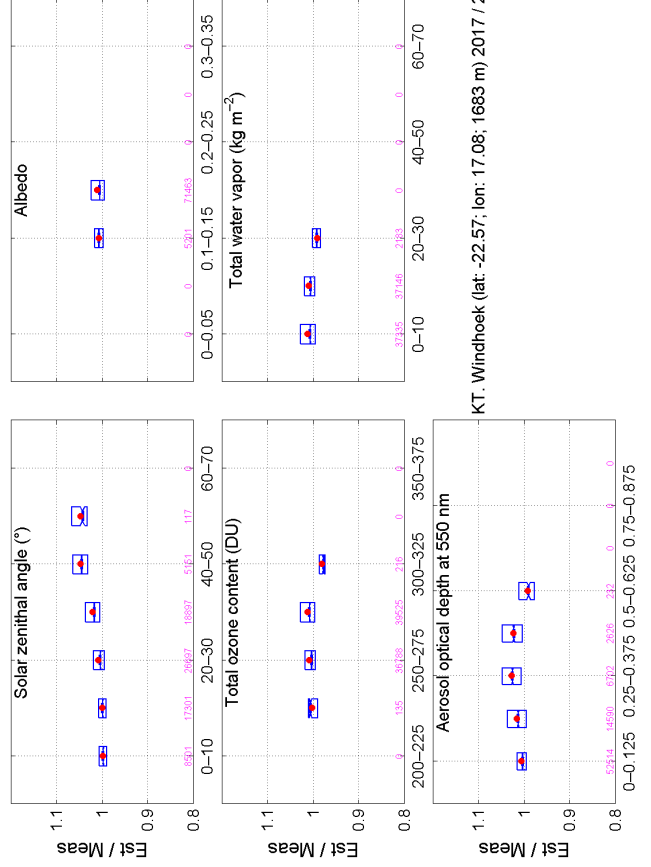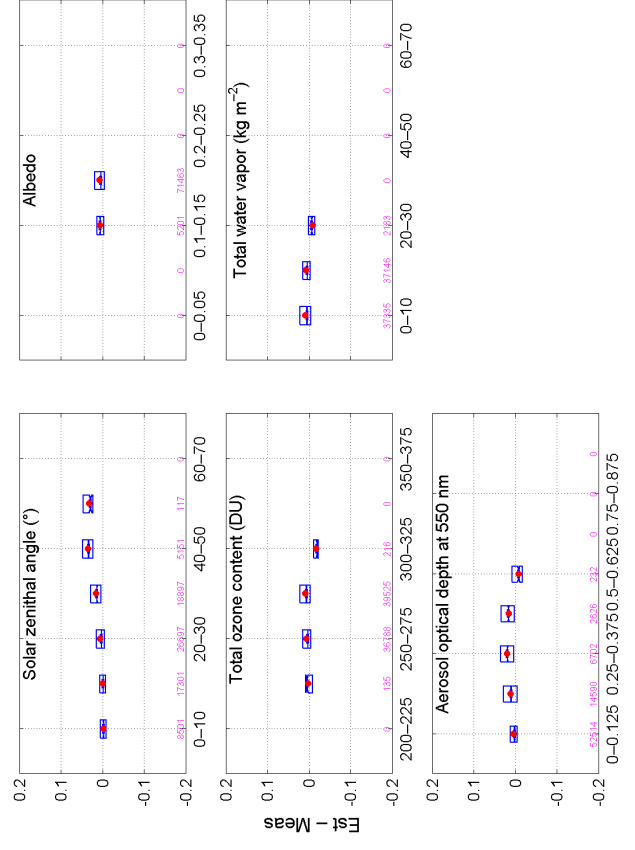

Figure S103: Comparison on clearness index at Windhoek

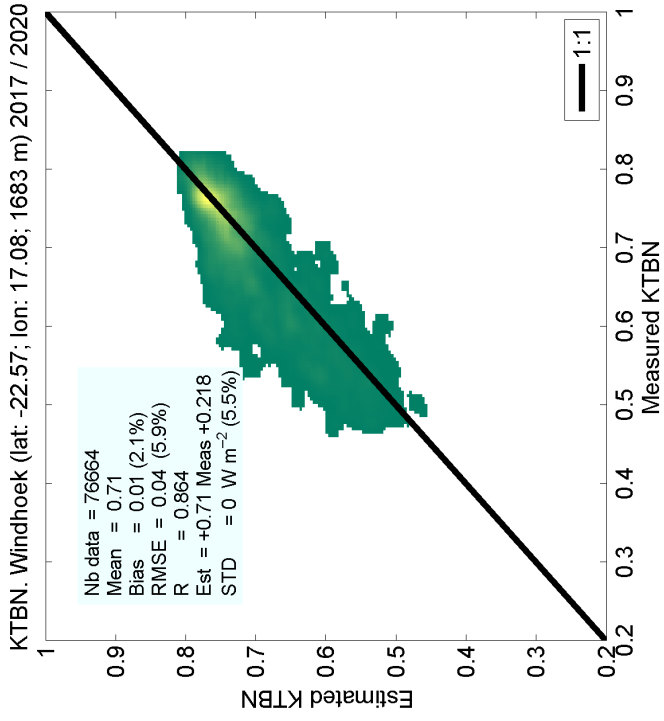

KTBN, Windhoek (lat: -22.57; lon: 17.08; 1683 m) 2017 / 2020

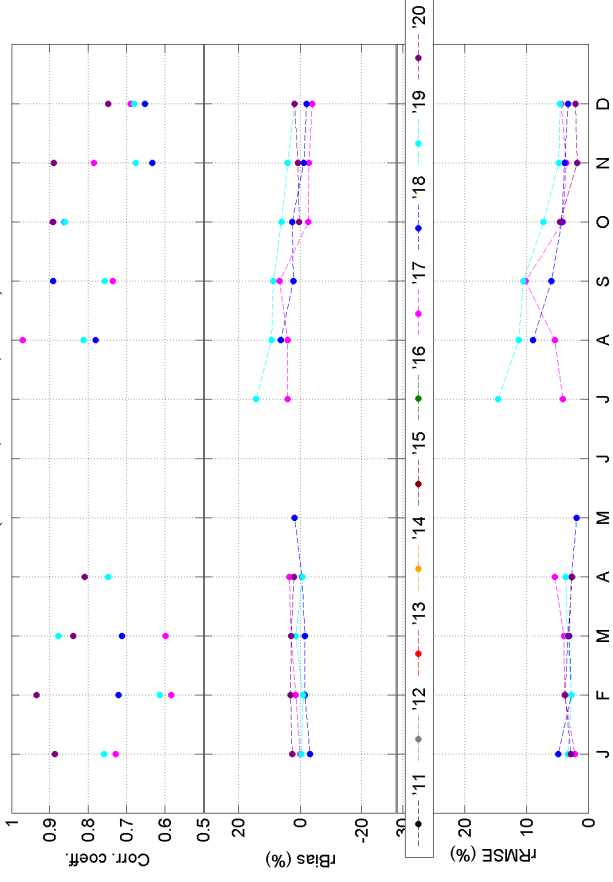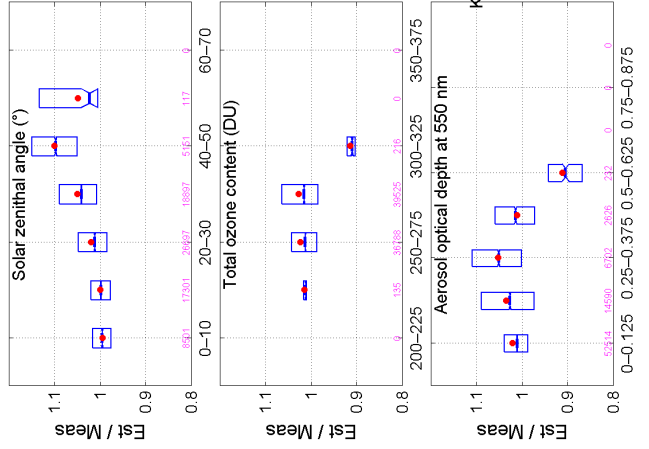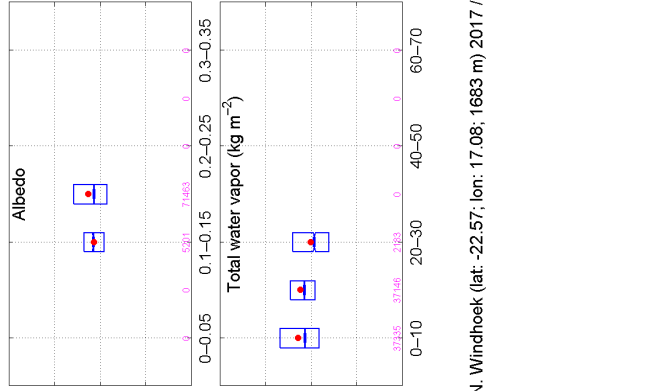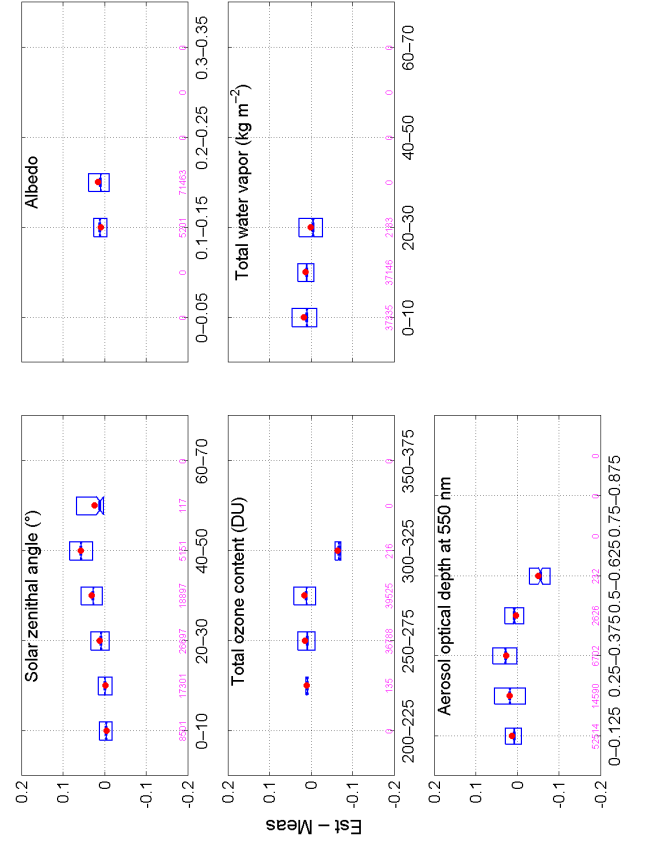

Figure S104: Comparison on direct clearness index at Windhoek

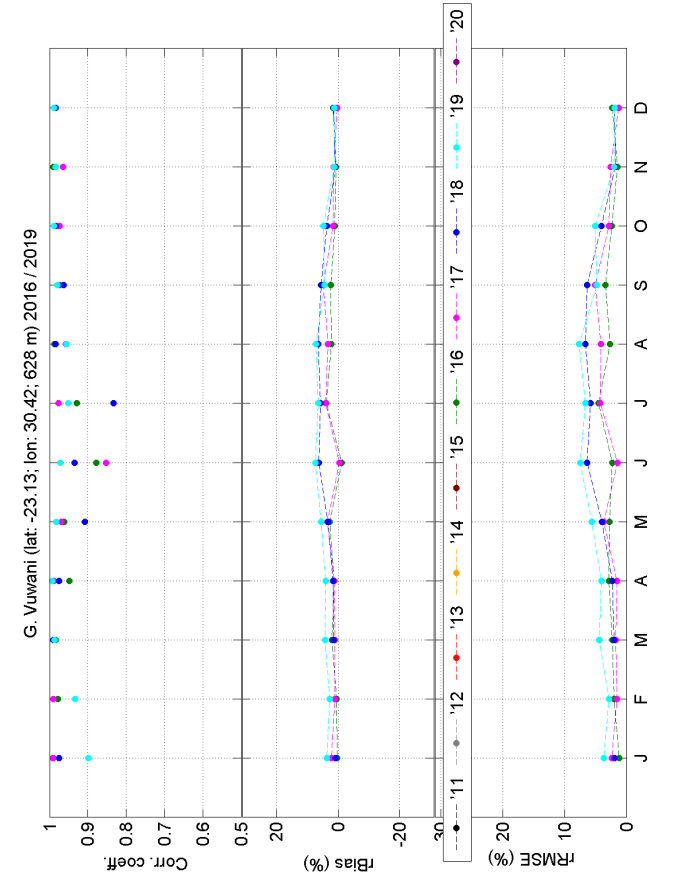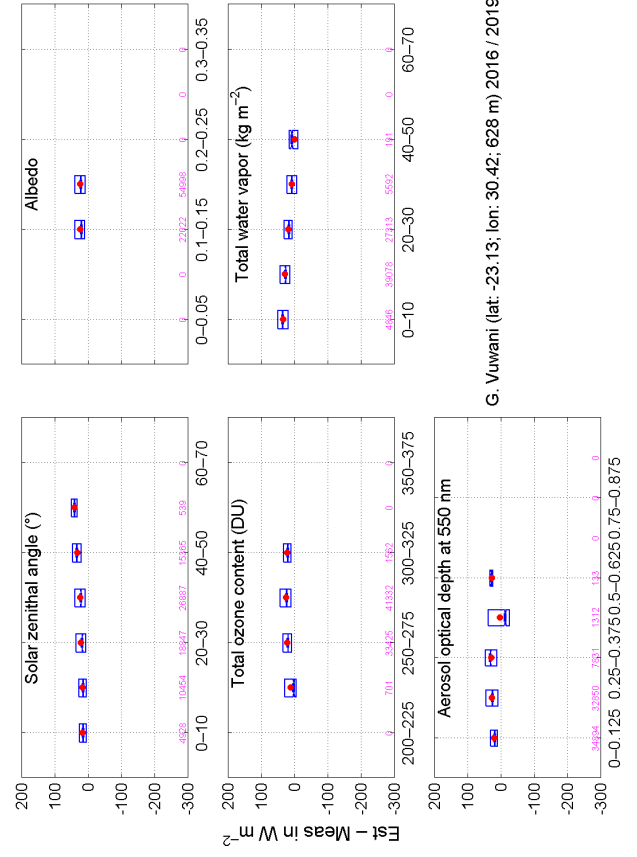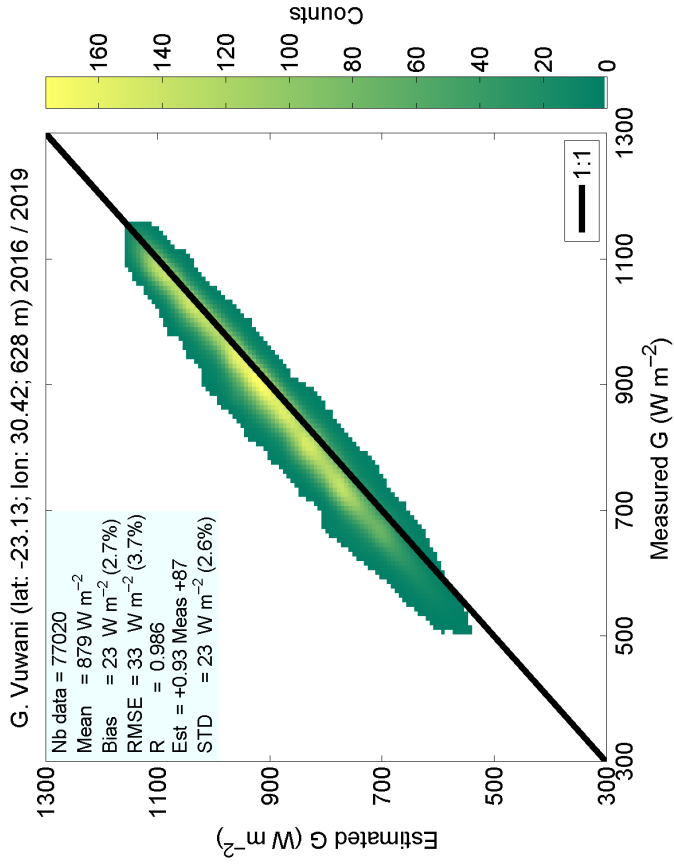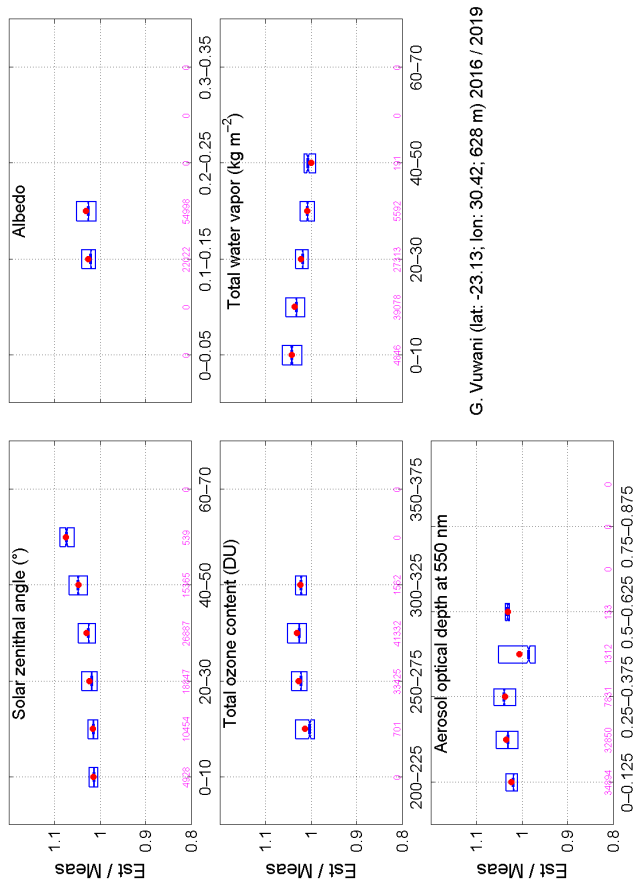

Figure S105: Comparison on global irradiance at Vuwani

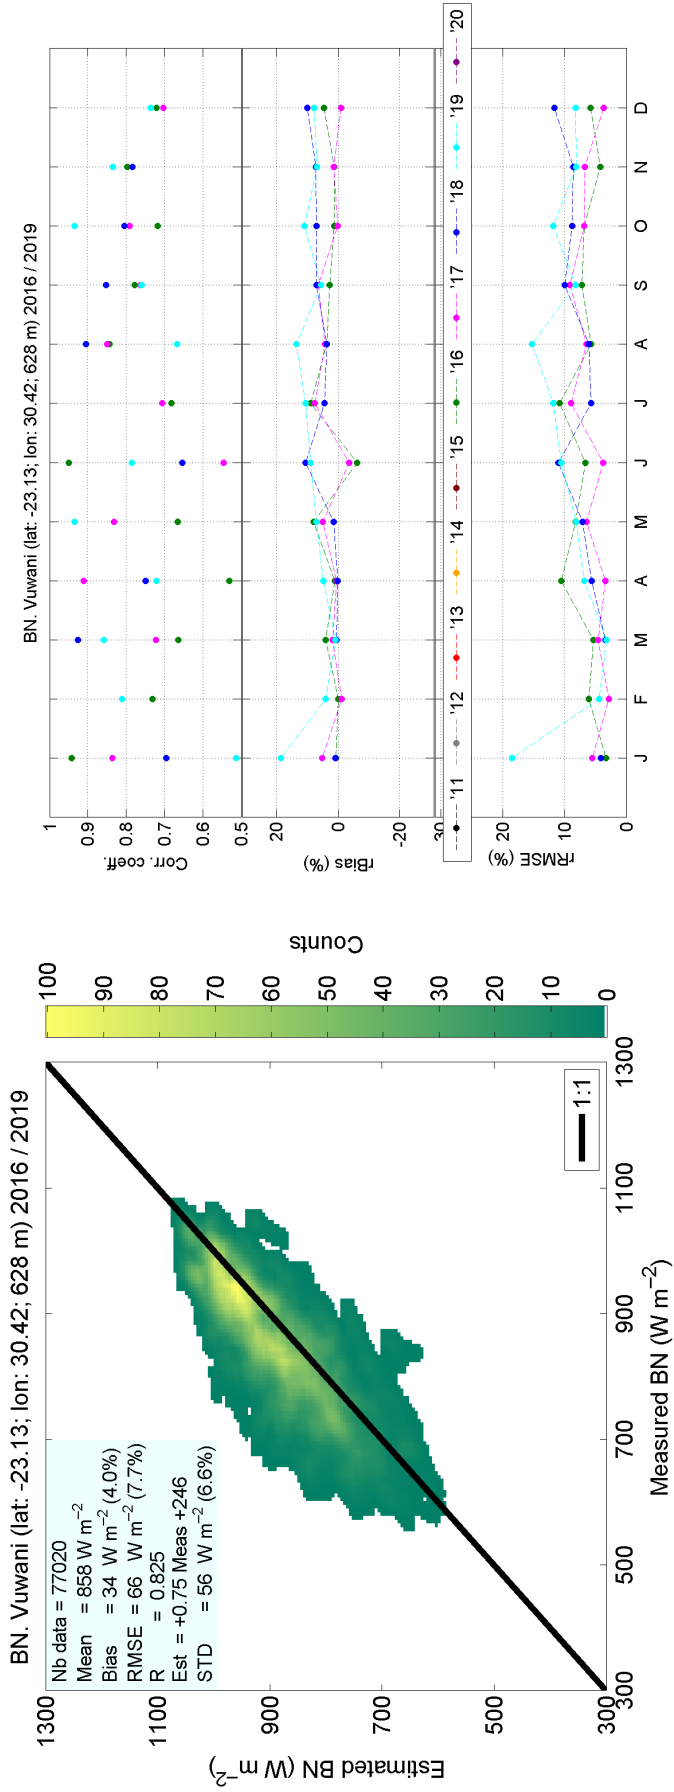

Figure S106: Comparison on direct component at normal irradiance at Vuwani

KT. Vuwani (lat: -23.13; lon: 30.42; 628 m) 2016 / 2019

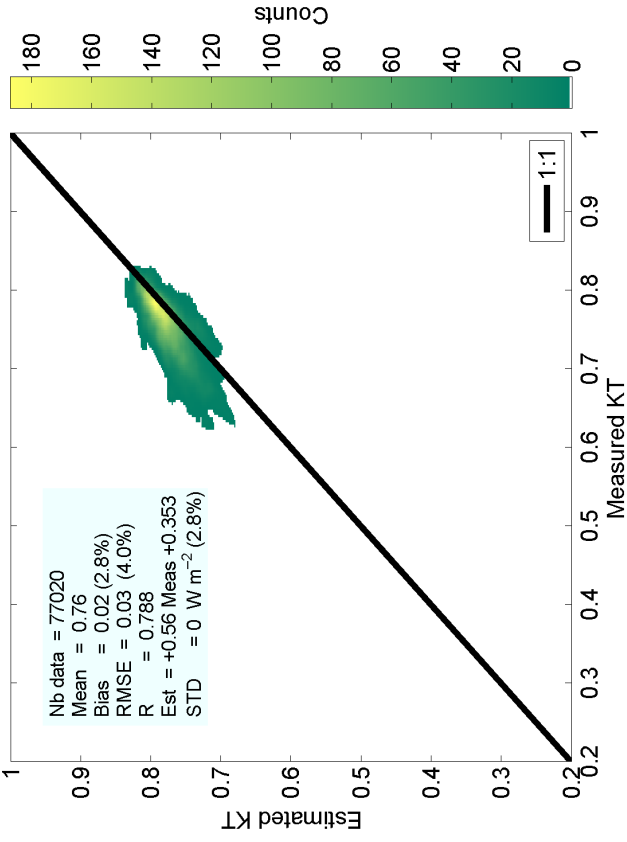

KT. Vuwani (lat: -23.13; lon: 30.42; 628 m) 2016 / 2019

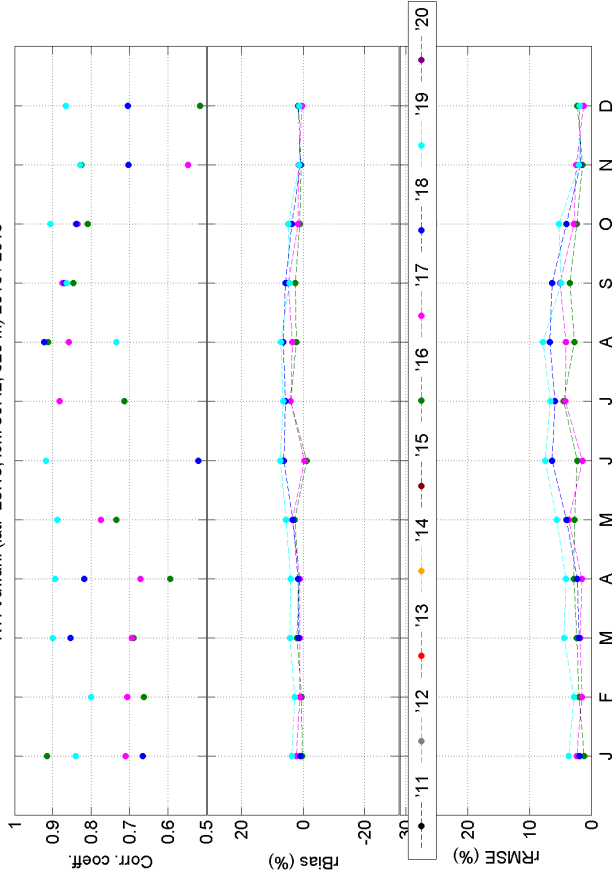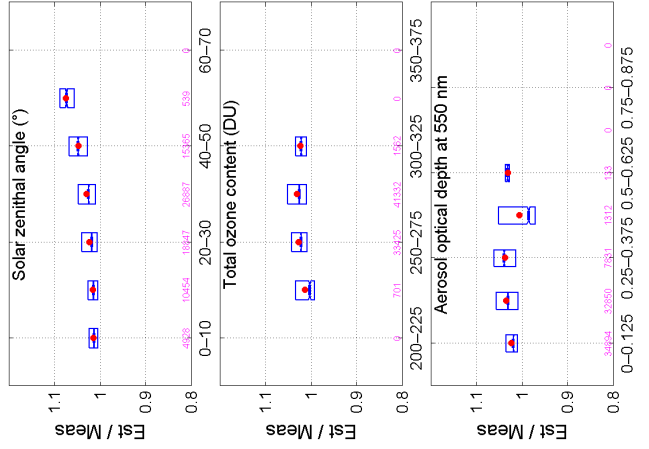

KT. Vuwani (lat: -23.13; lon: 30.42; 628 m) 2016 / 2019

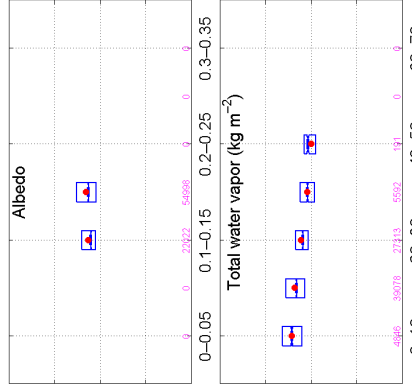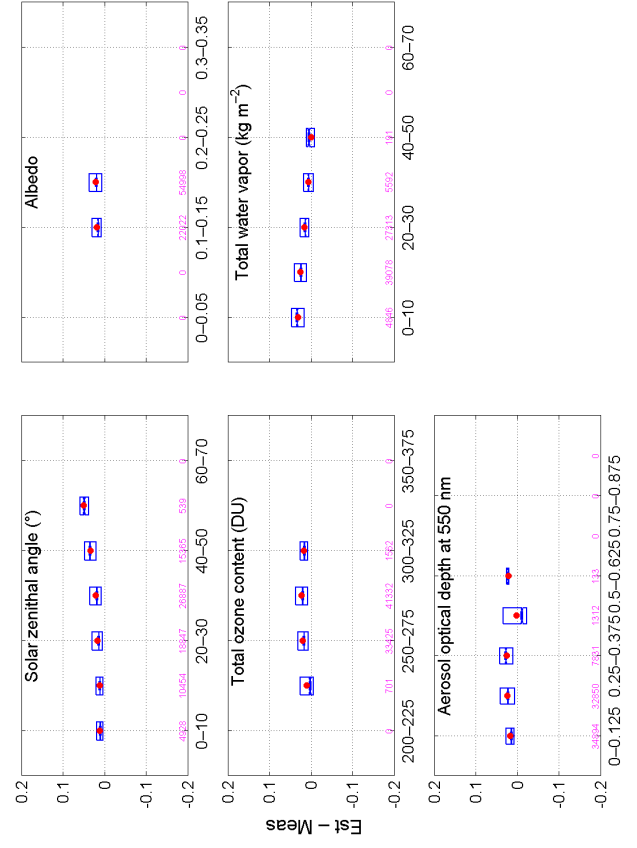

Figure S107: Comparison on clearness index at Vuwani

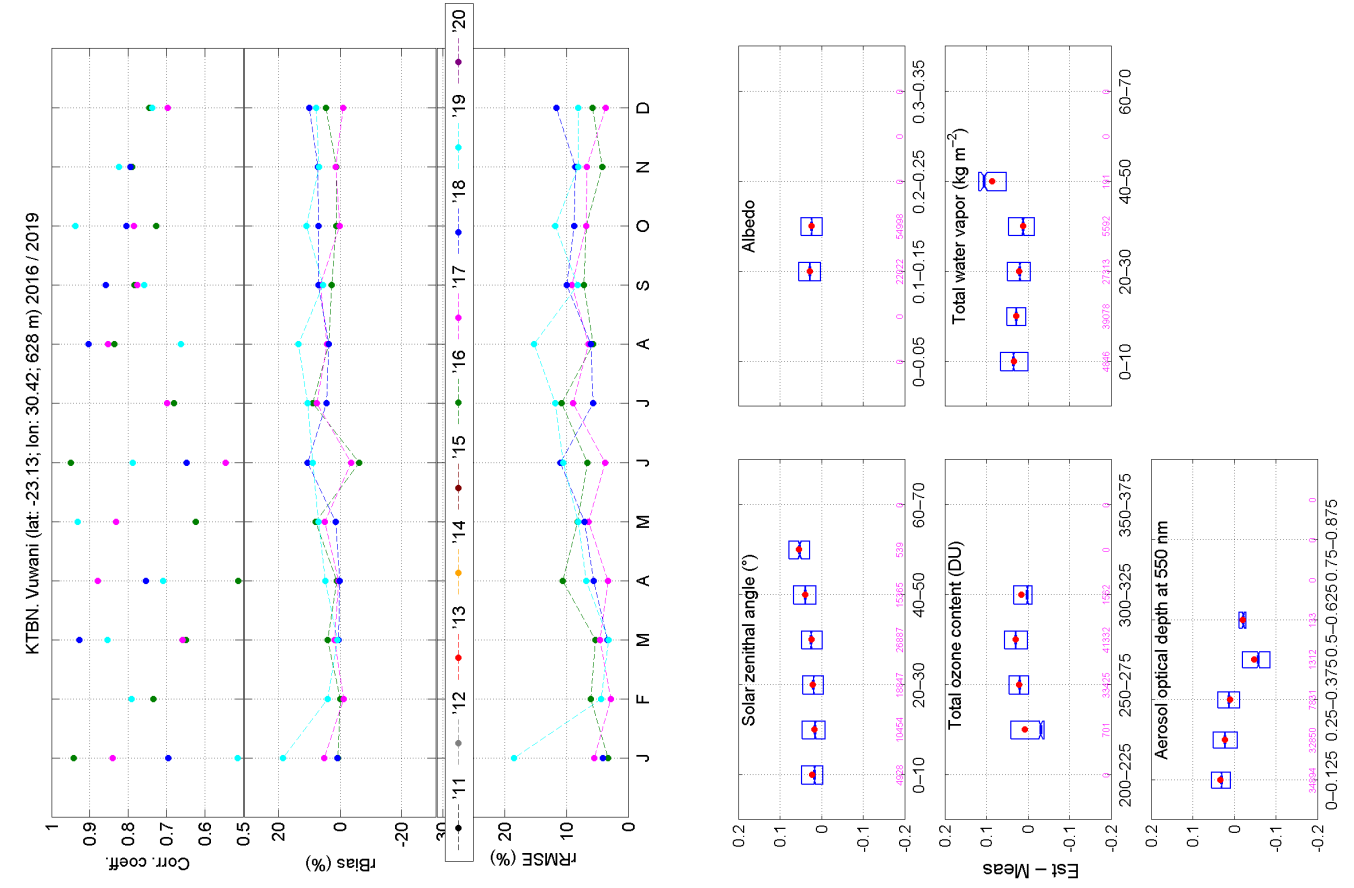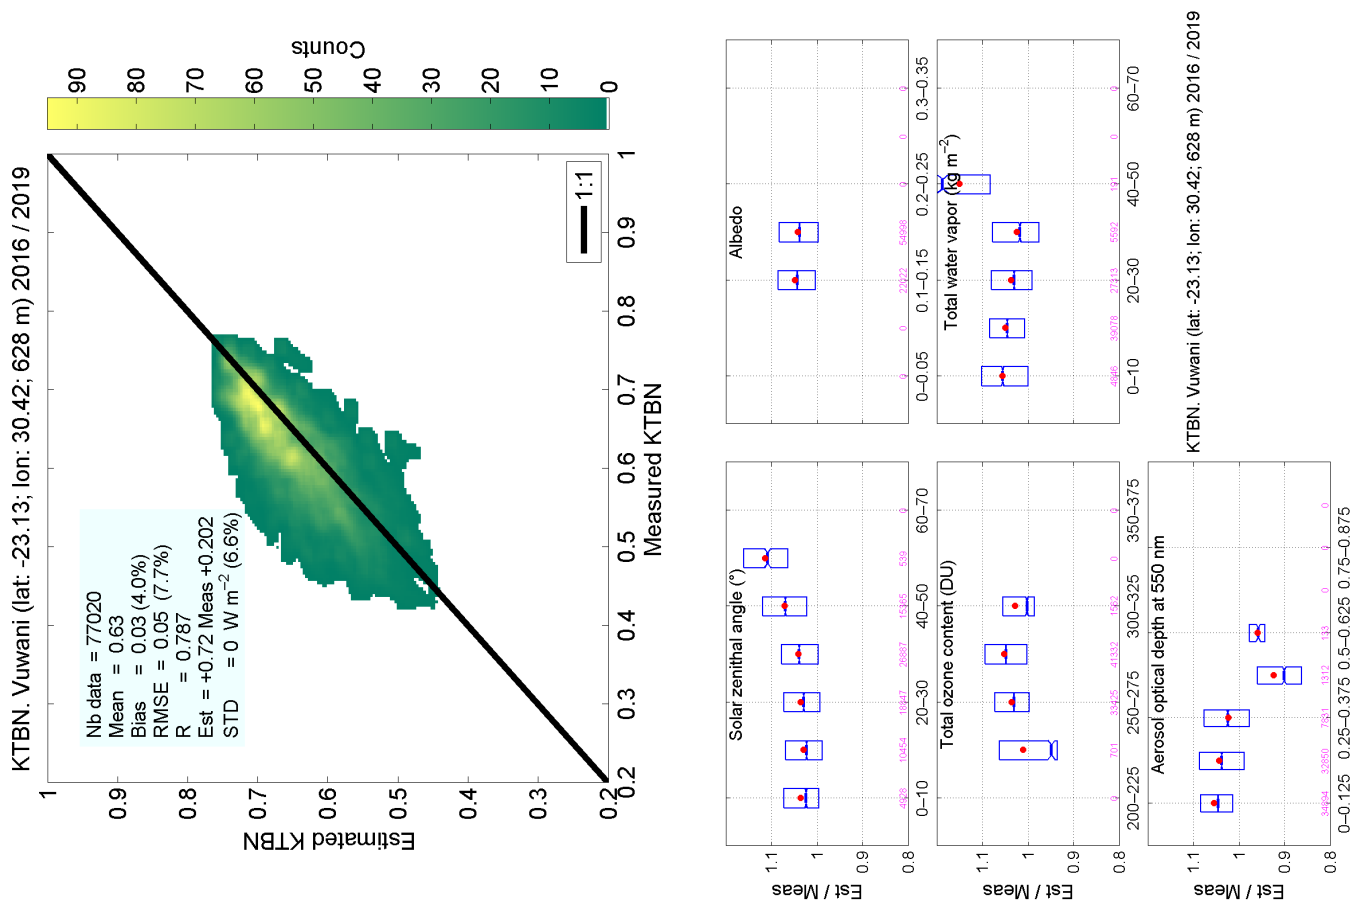

Figure S108: Comparison on direct clearness index at Vuwani

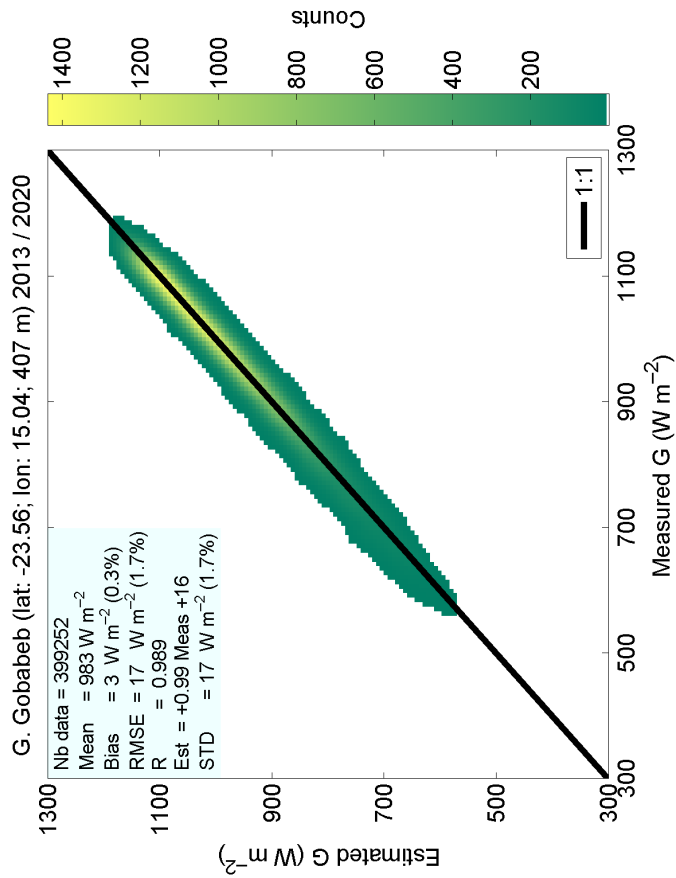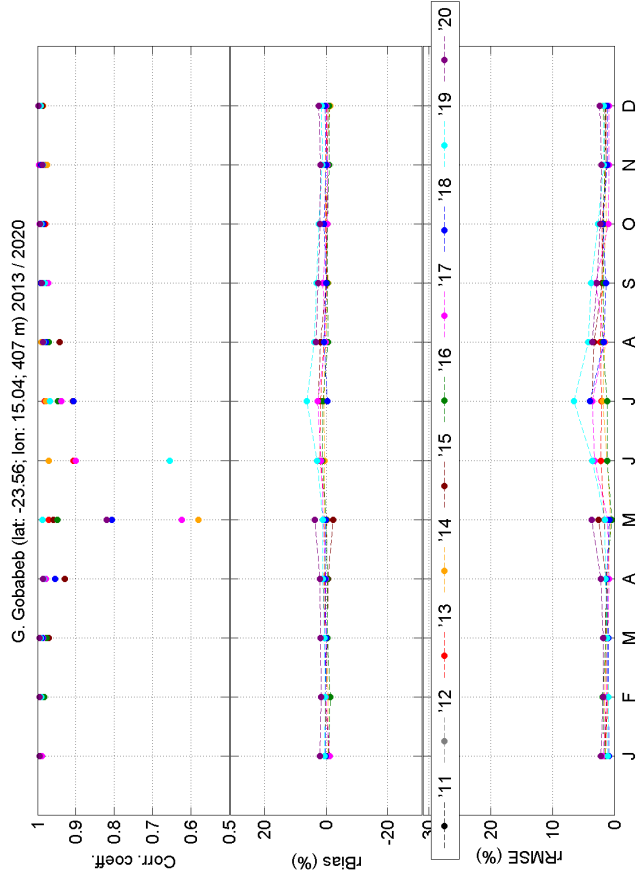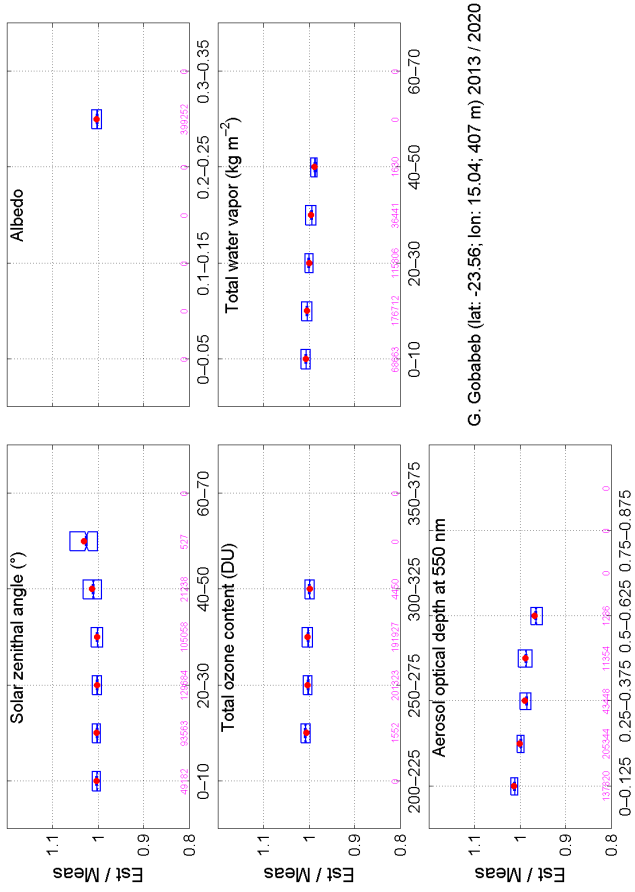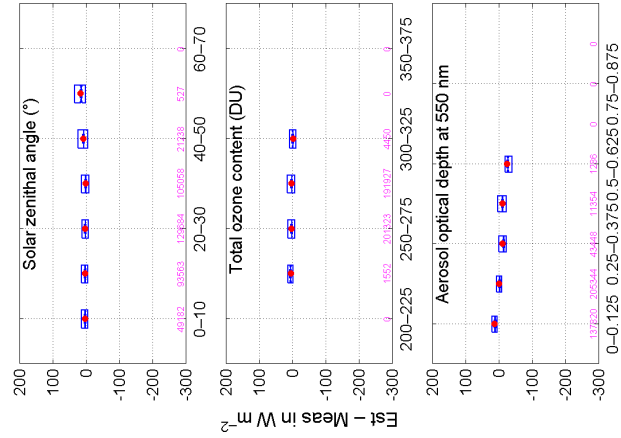

Figure S109: Comparison on global irradiance at Gobabeb

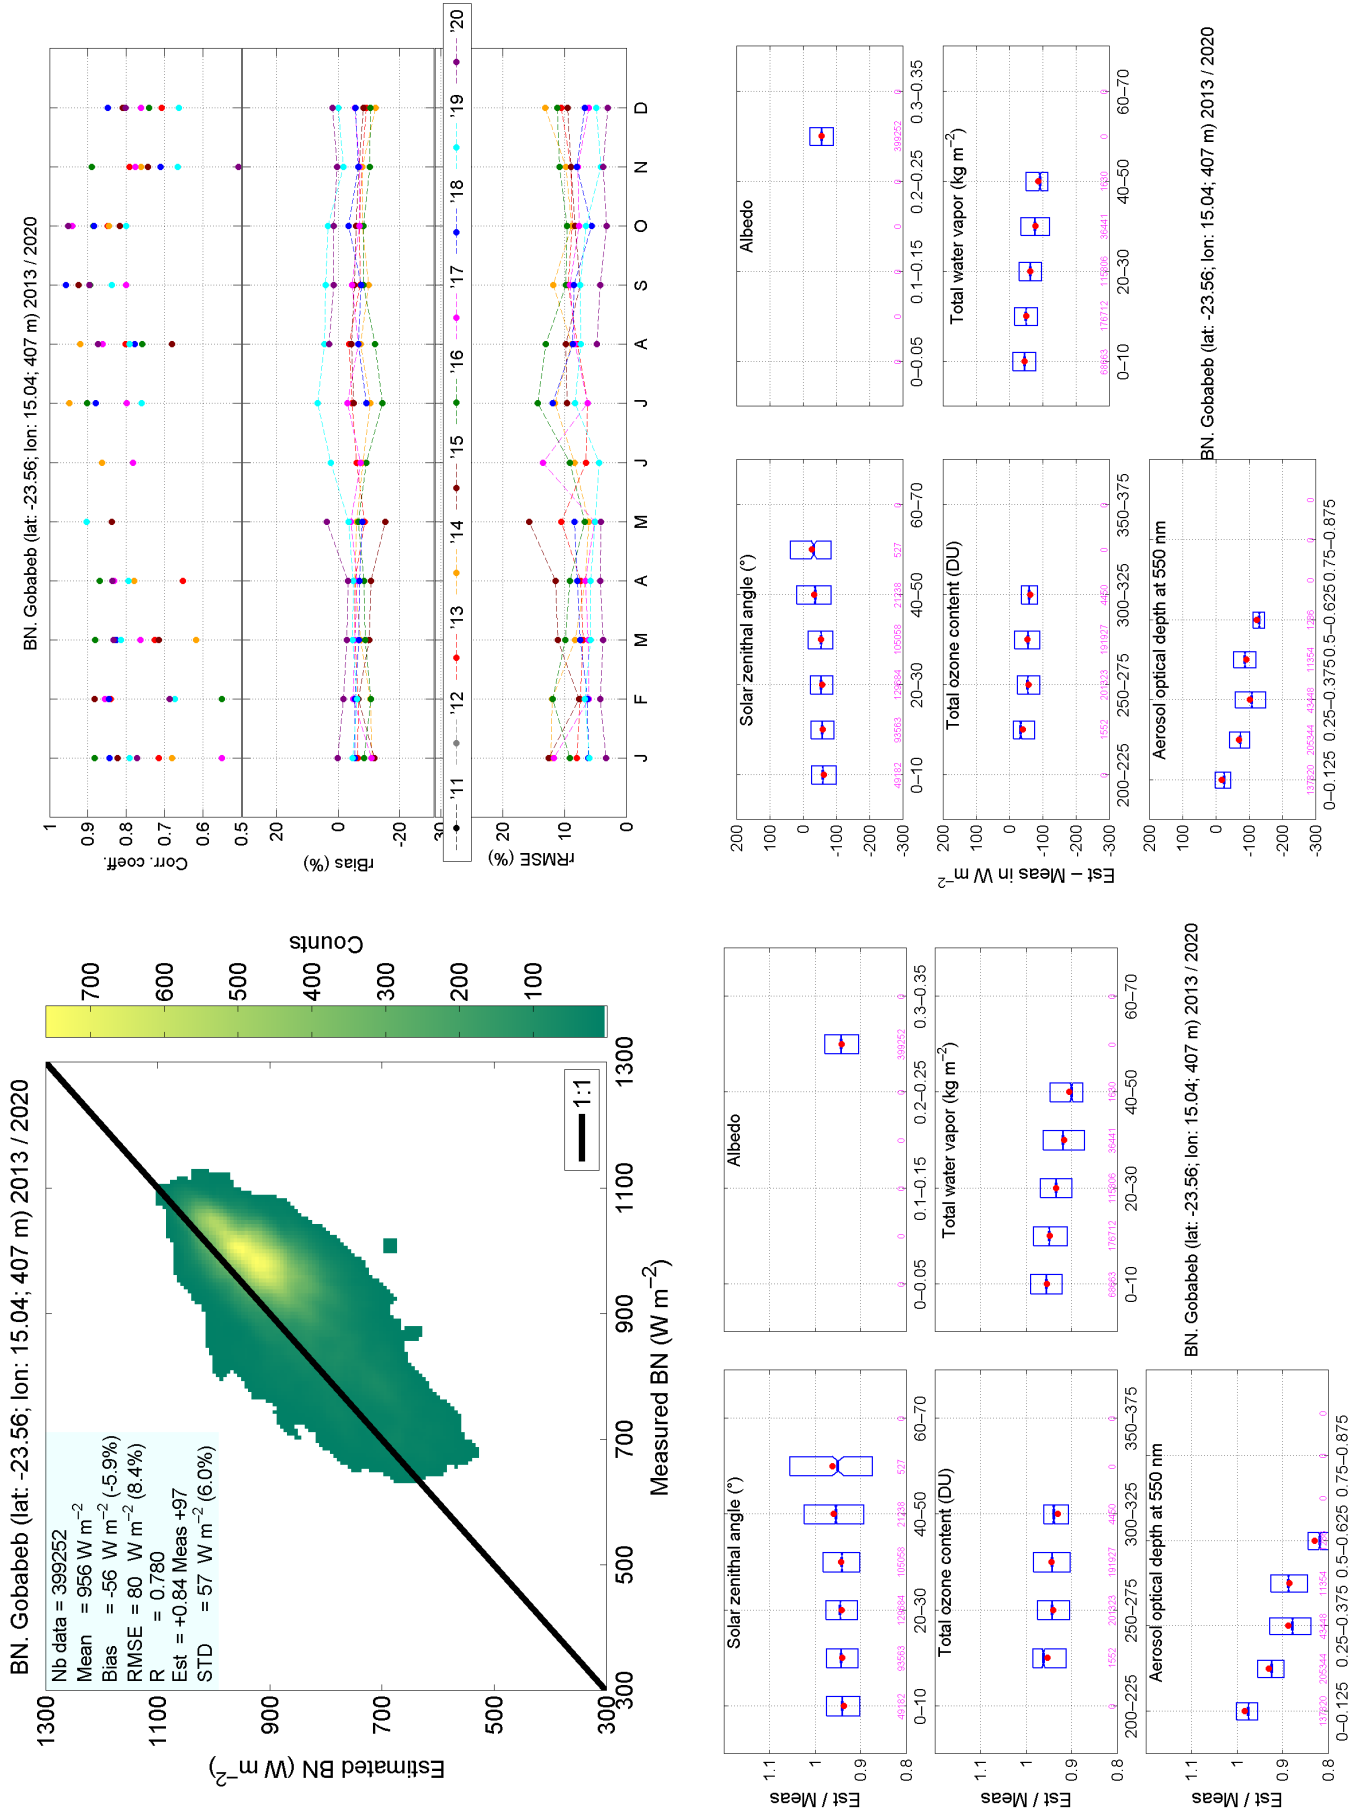

BN, Gobabeb (lat: -23.56; lon: 15.04; 407 m) 2013 / 2020

BN, Gobabeb (lat: -23.56; lon: 15.04; 407 m) 2013 / 2020

Figure S110: Comparison on direct component at normal irradiance at Gobabeb



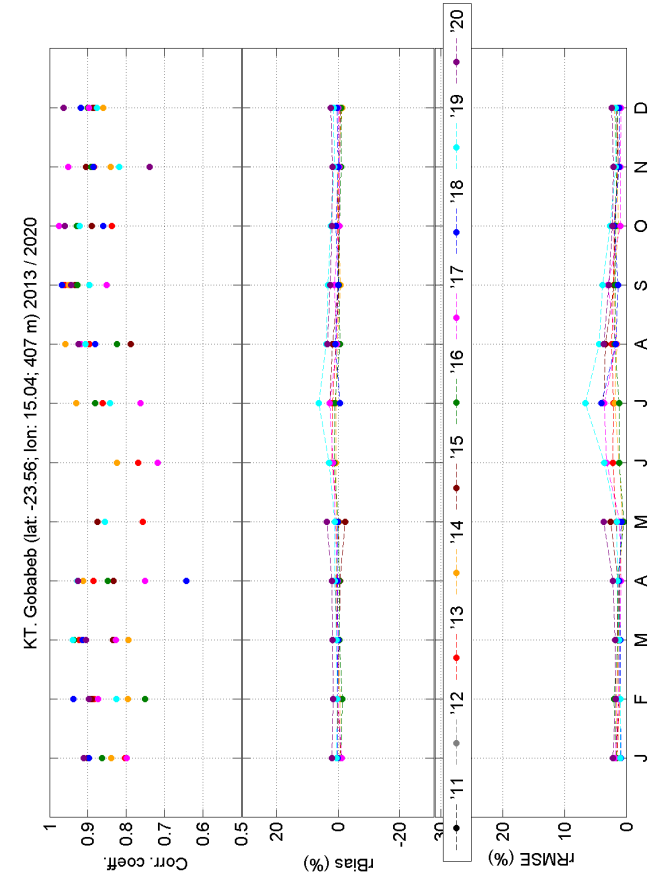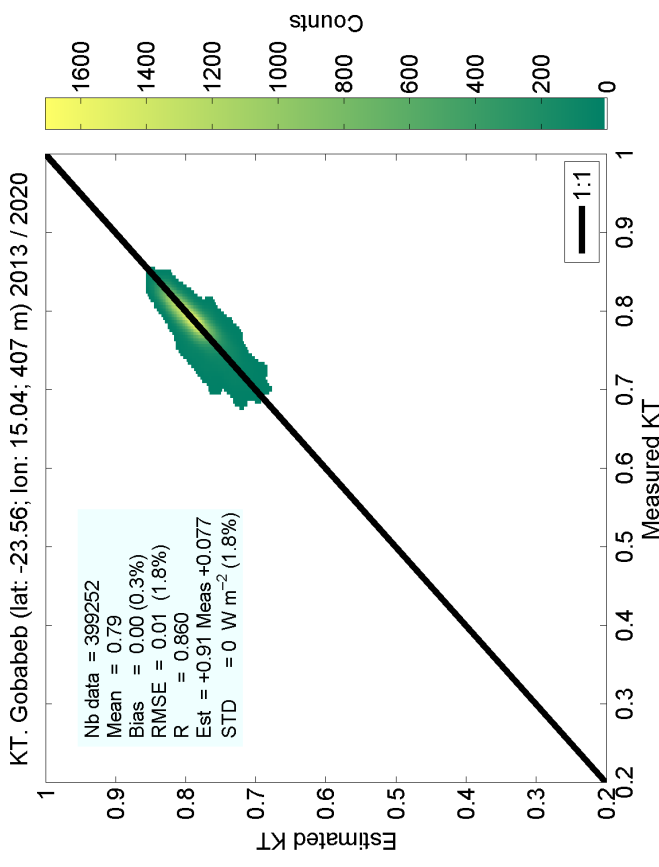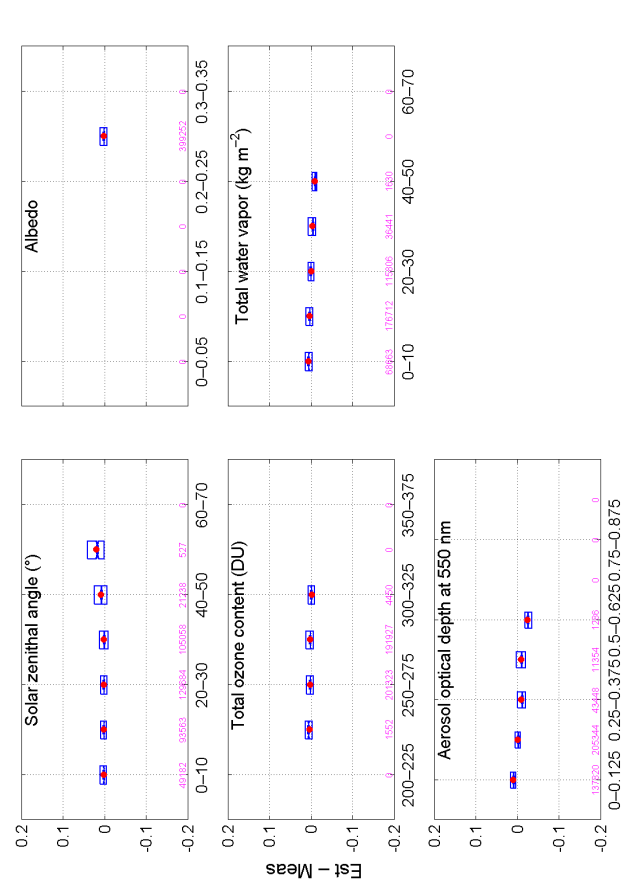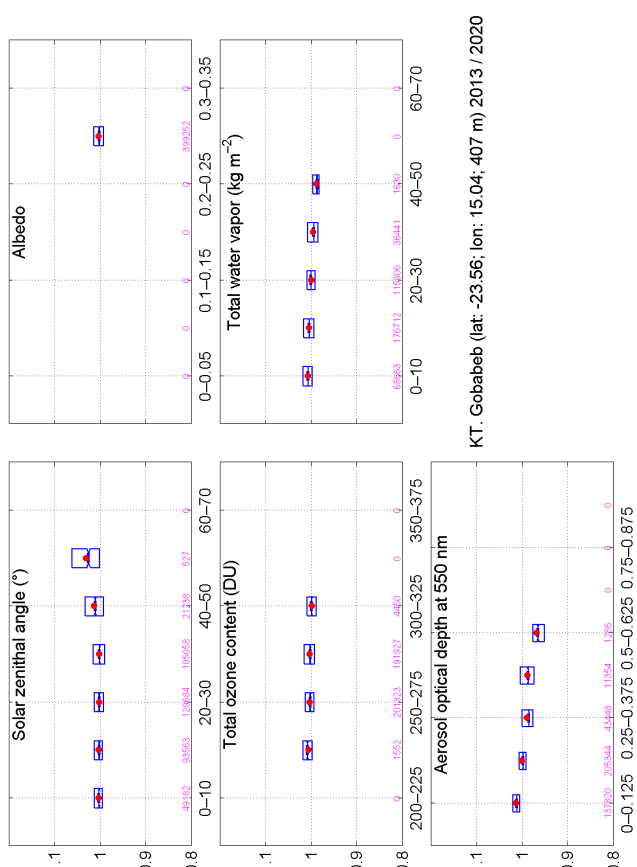

Figure S111: Comparison on clearness index at Gobabeb

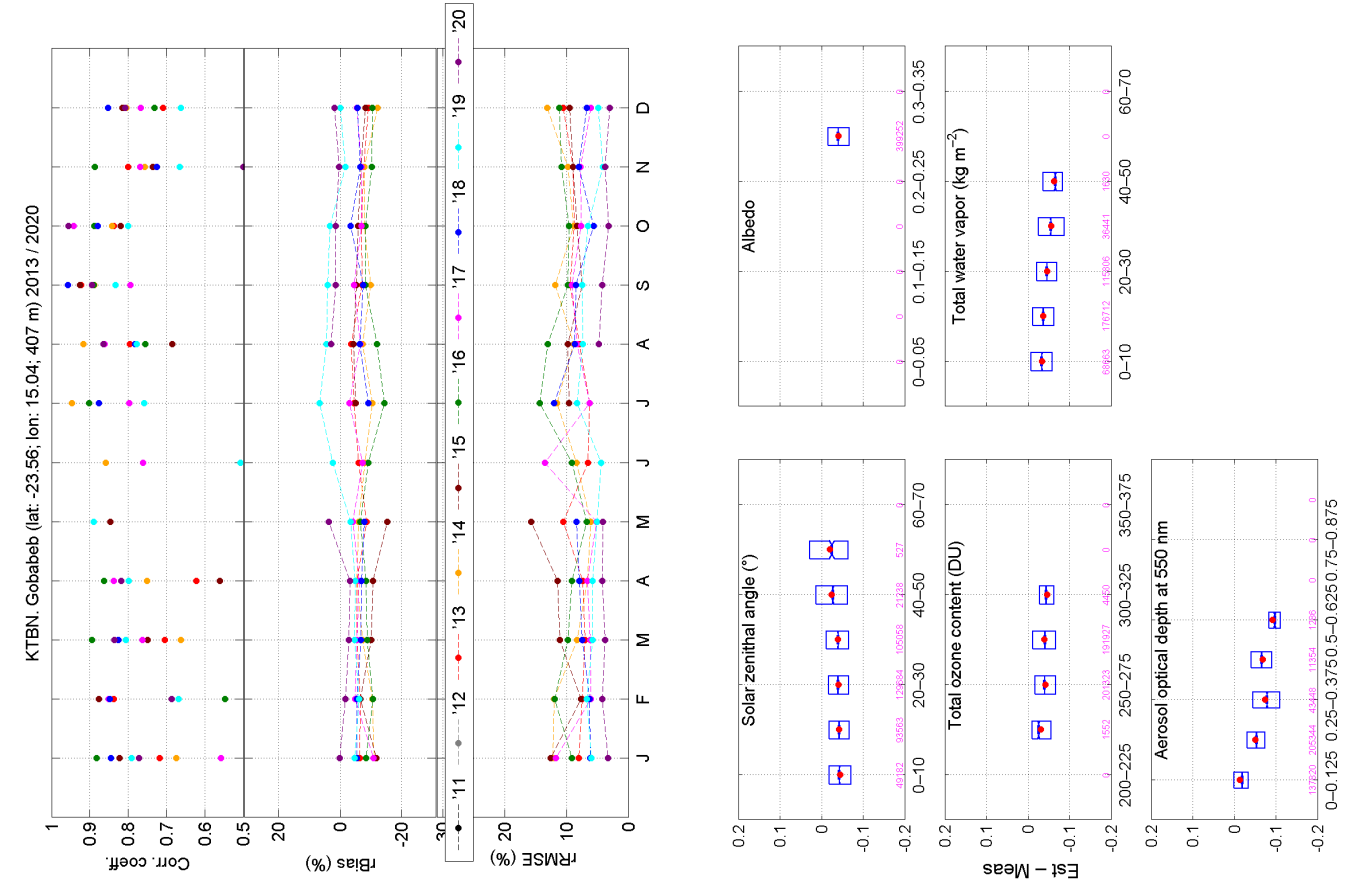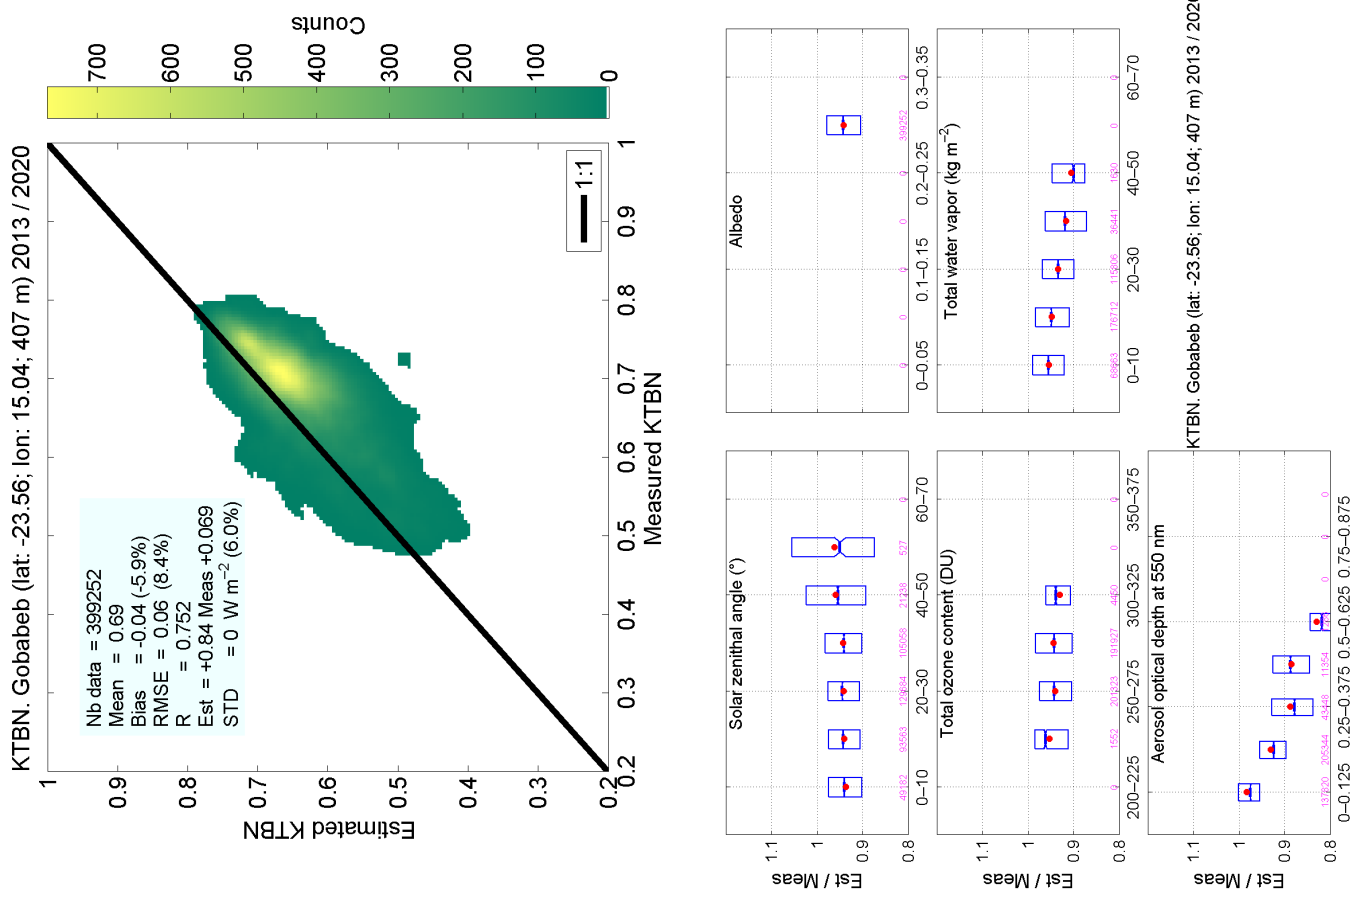

Figure S112: Comparison on direct clearness index at Gobabeb

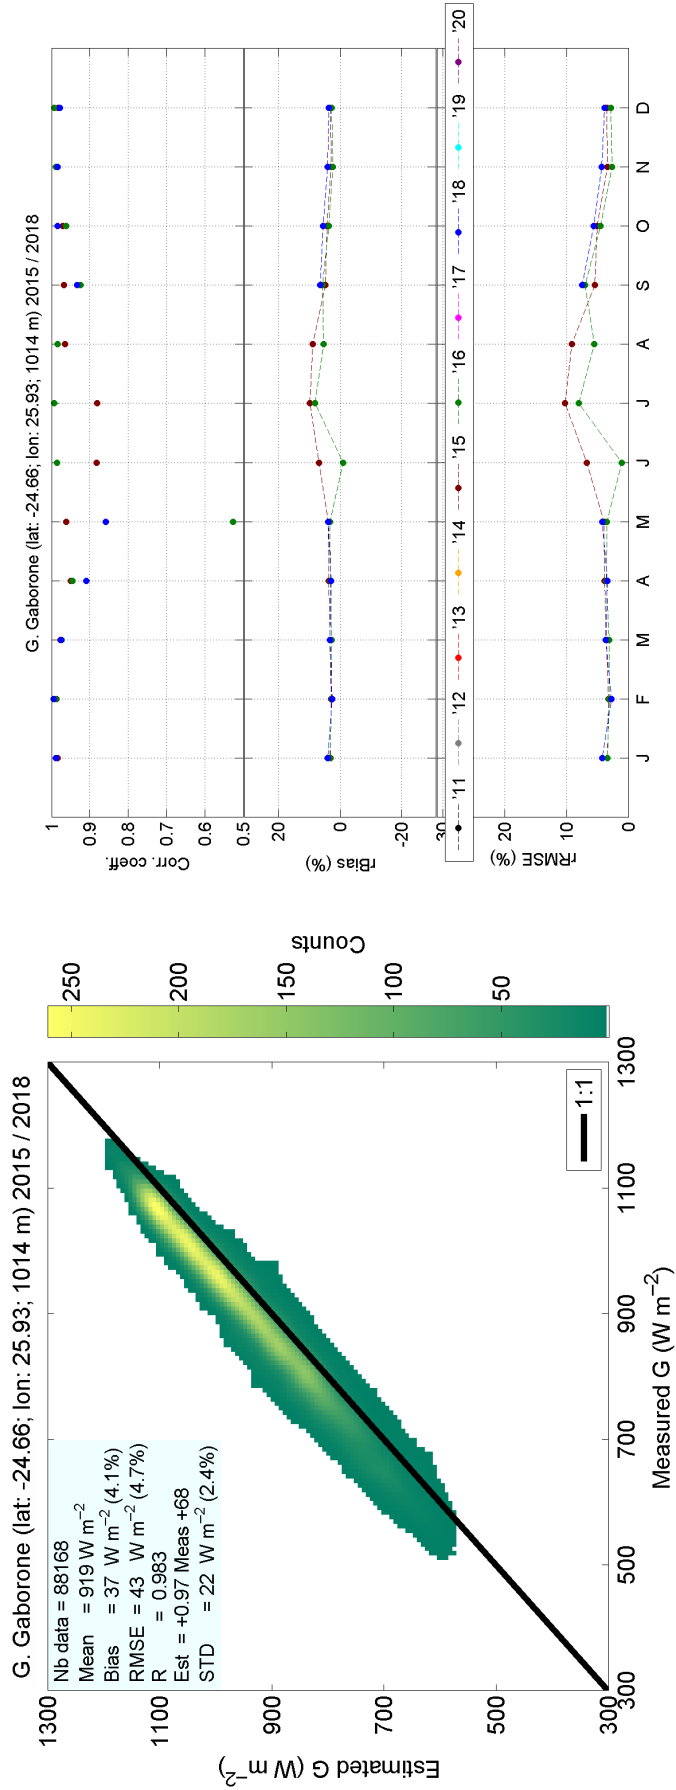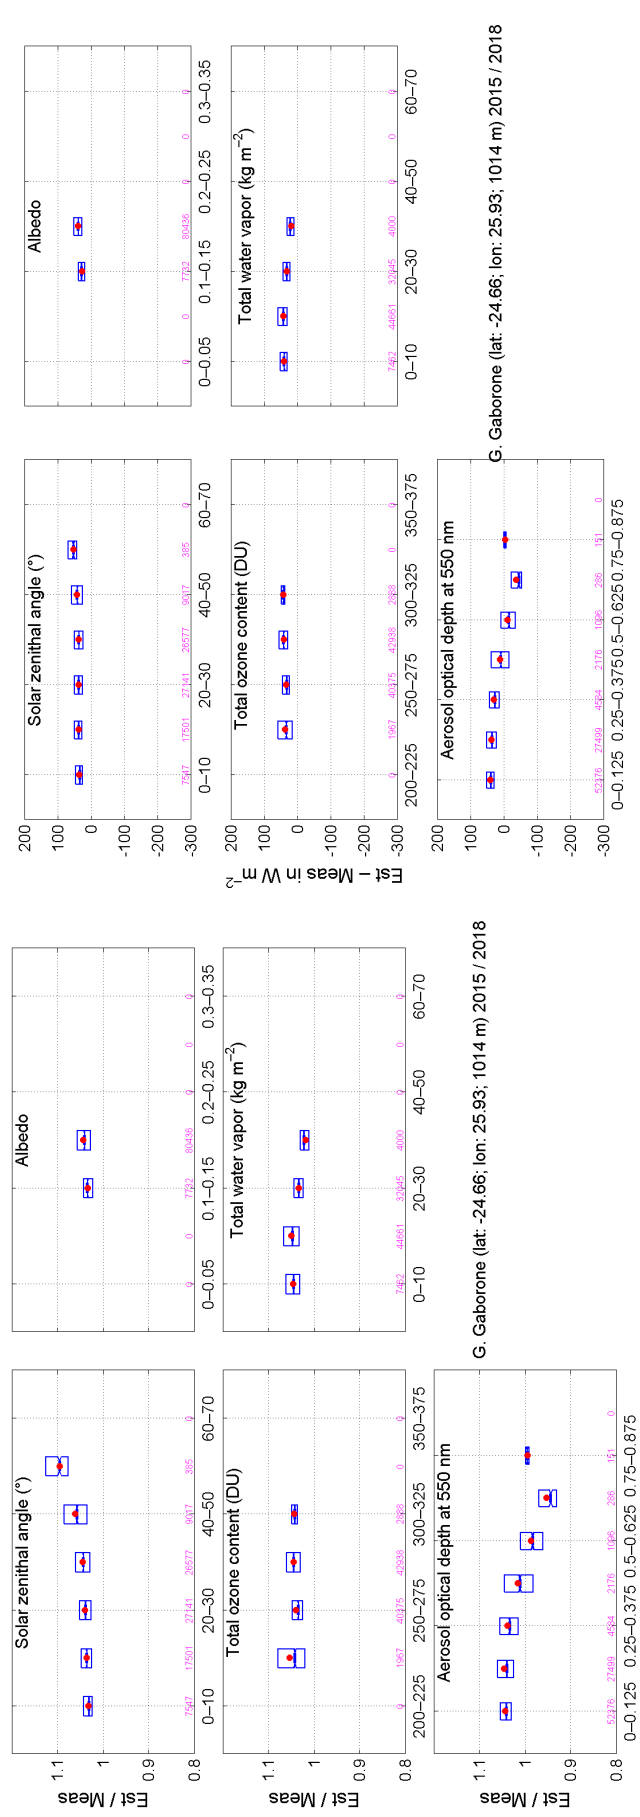

Figure S113: Comparison on global irradiance at Gaborone

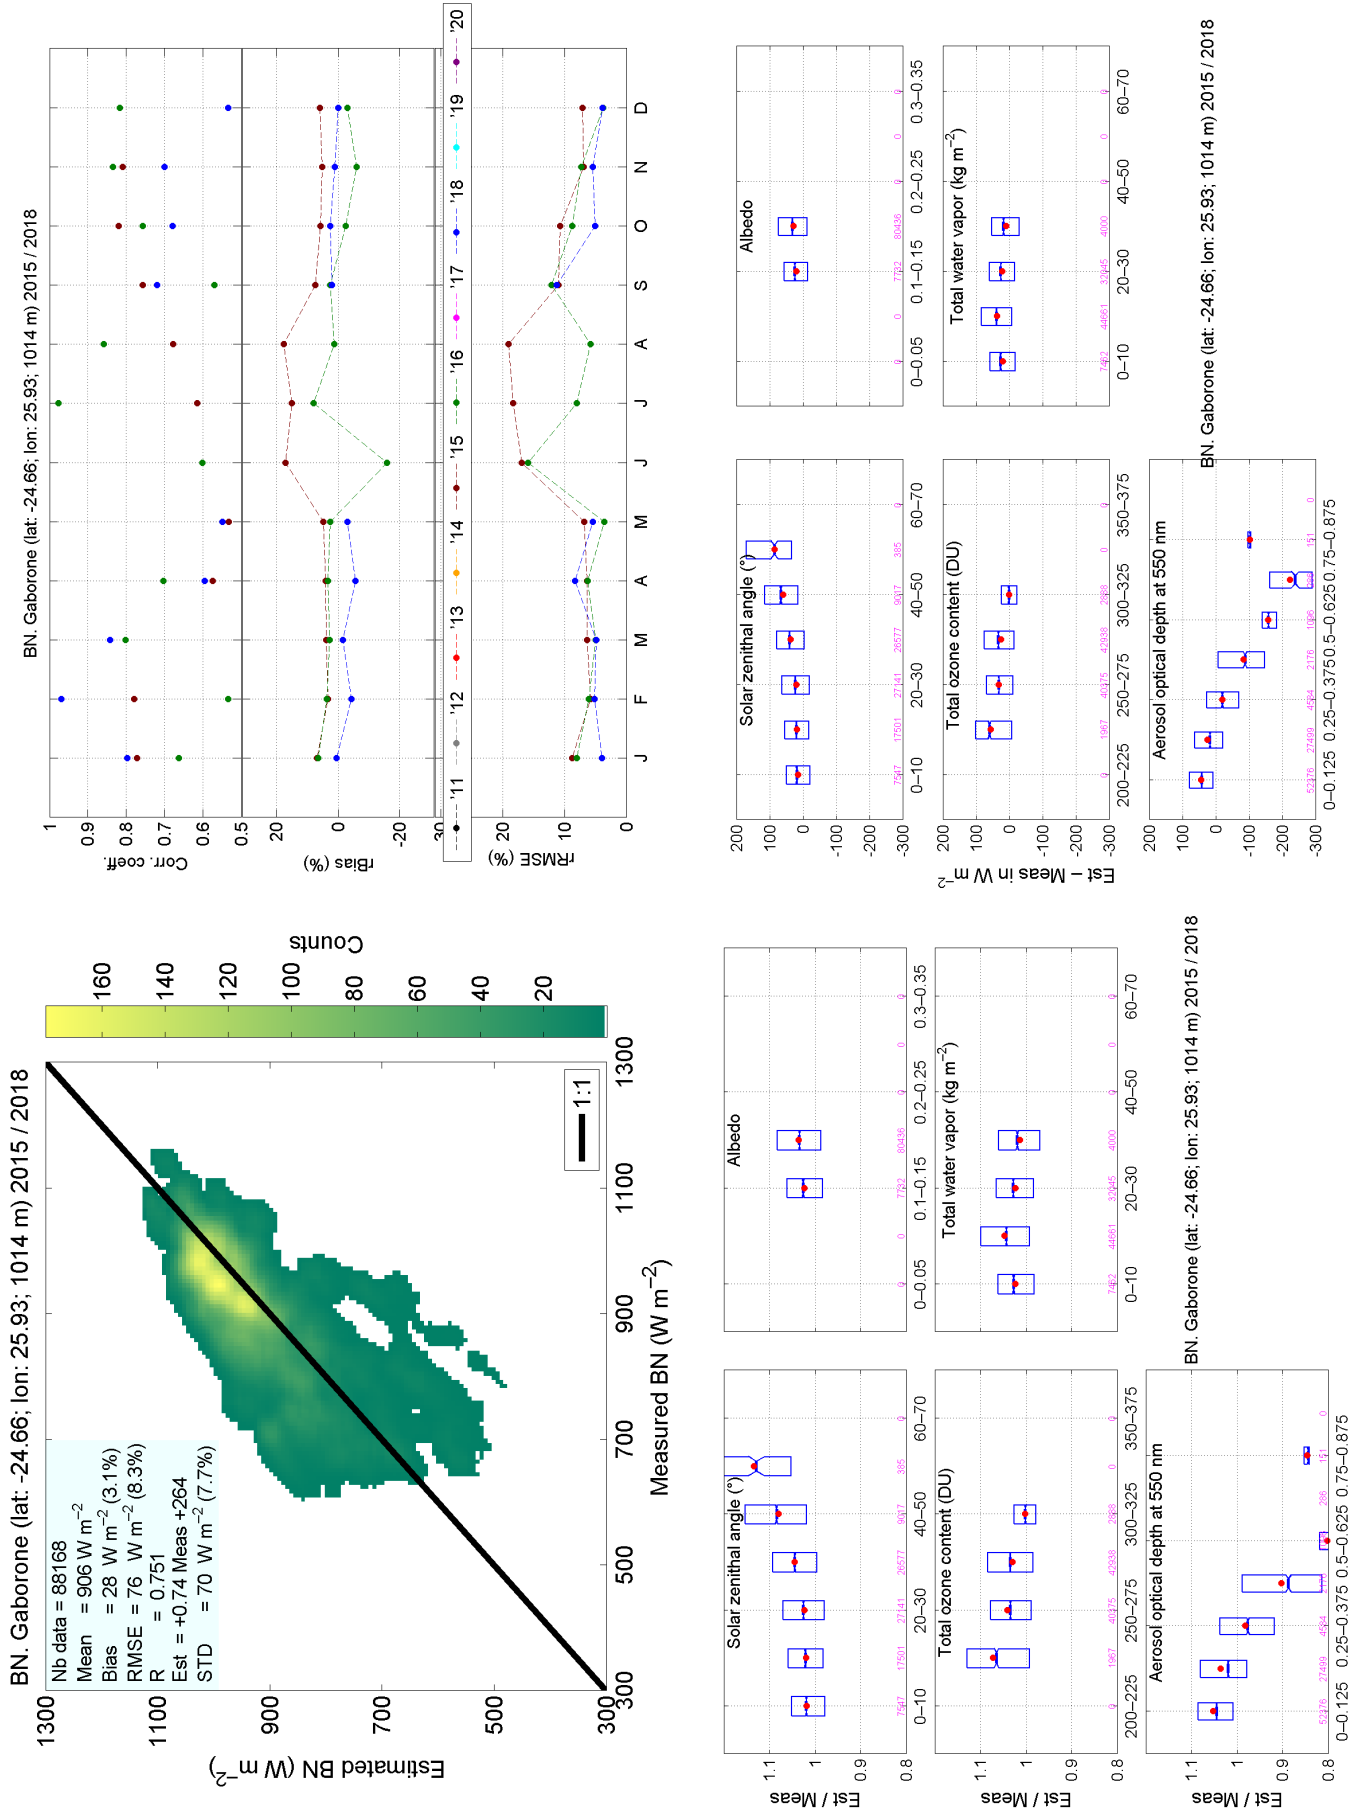

Figure S114: Comparison on direct component at normal irradiance at Gaborone

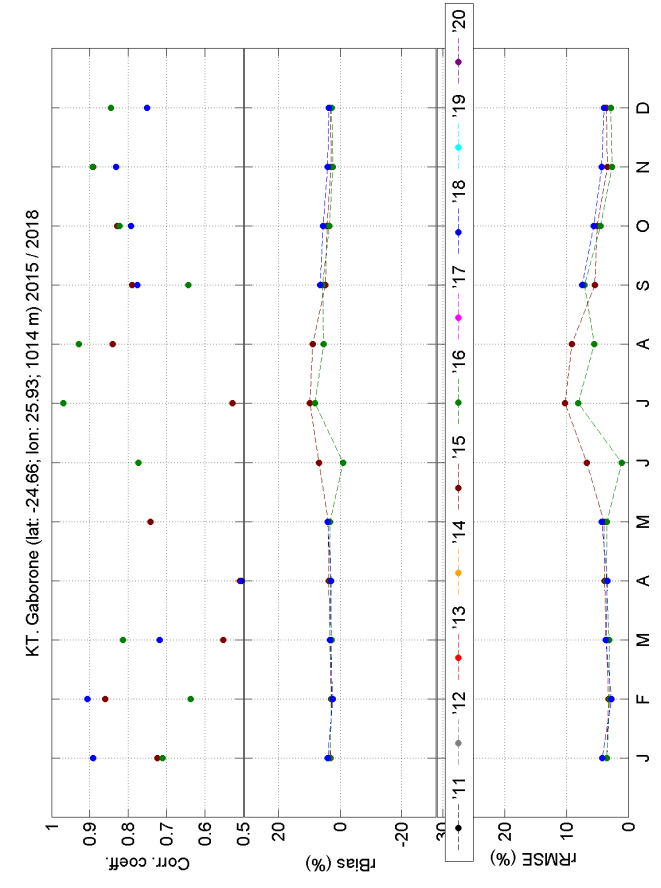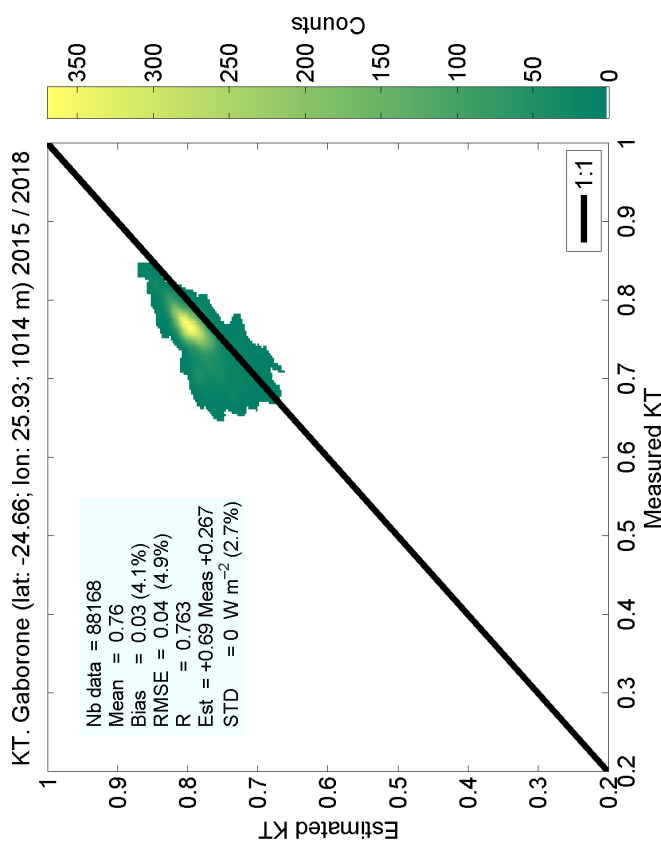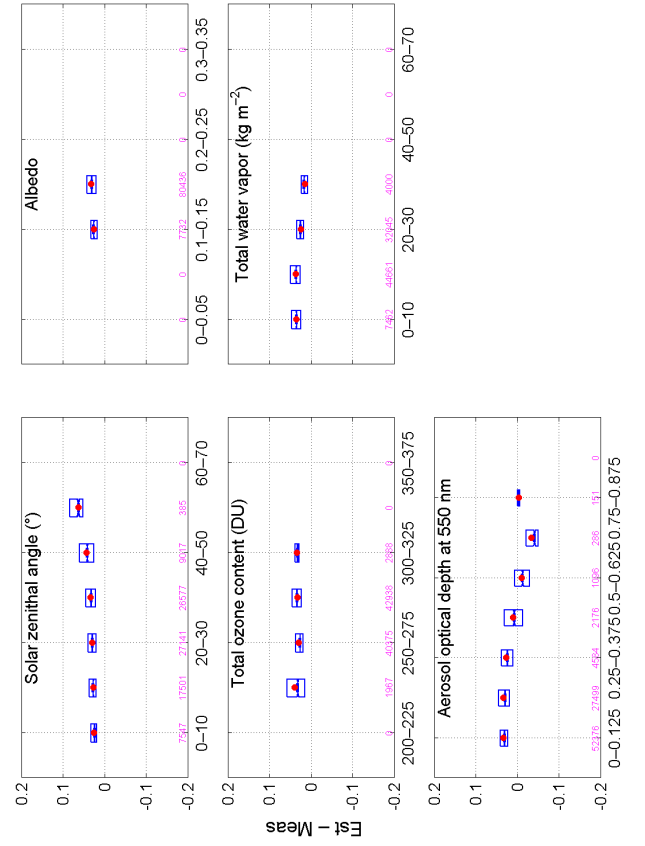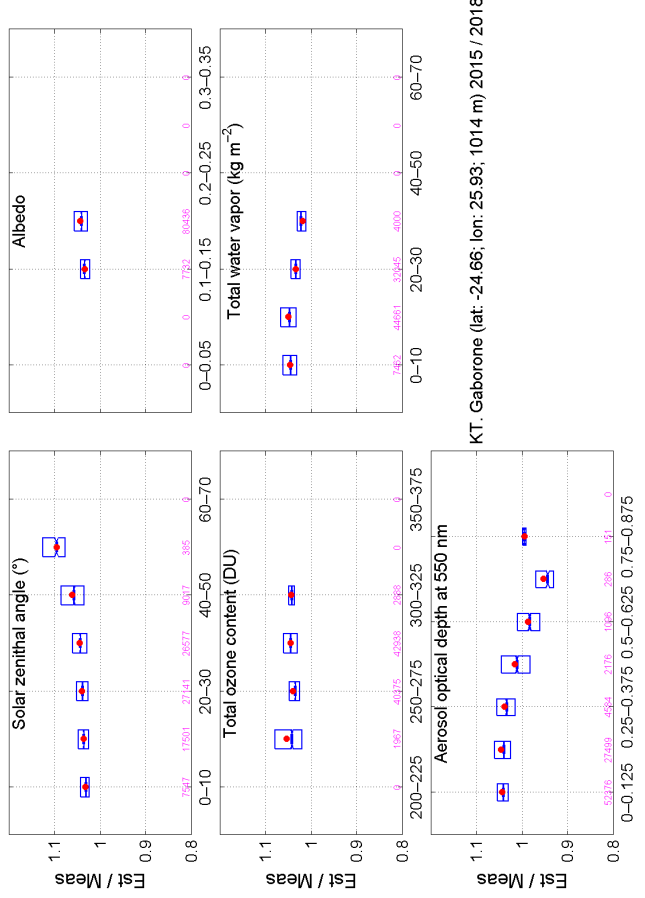

Figure S115: Comparison on clearness index at Gaborone

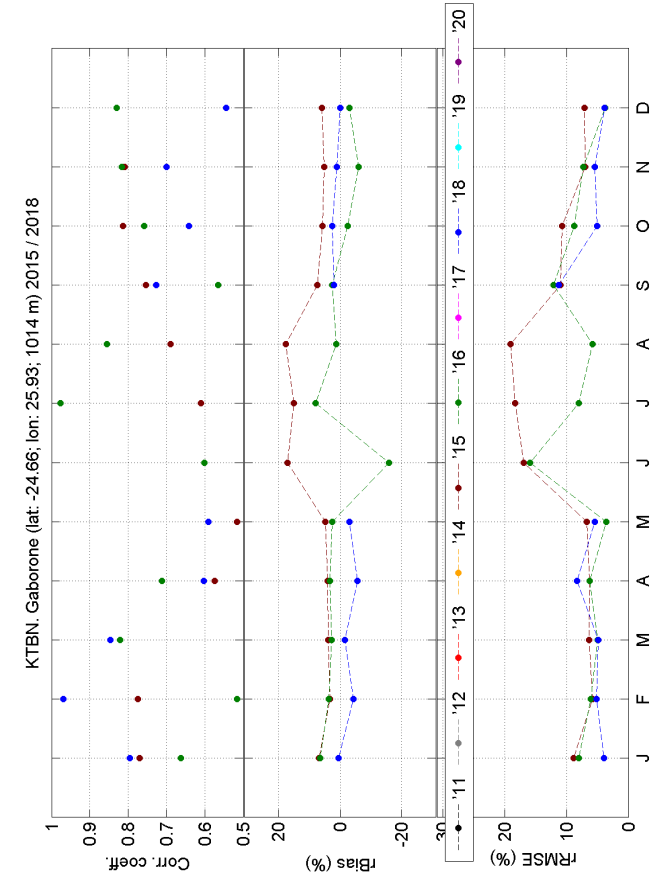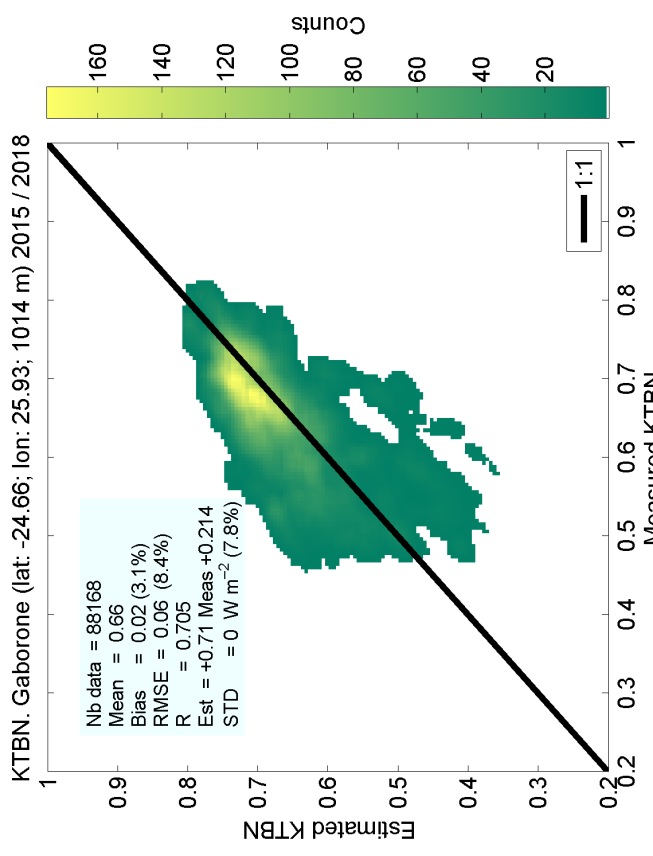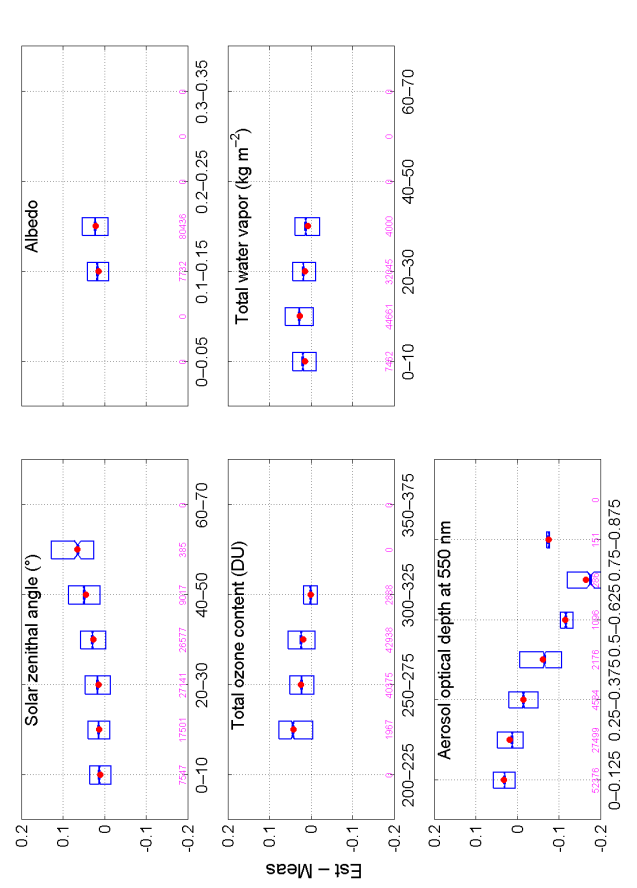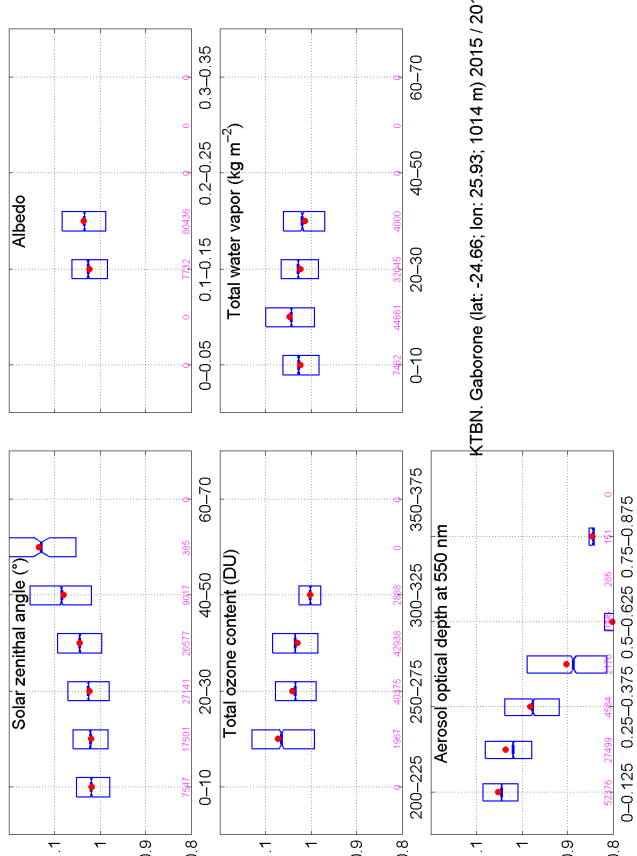

Figure S116: Comparison on direct clearness index at Gaborone

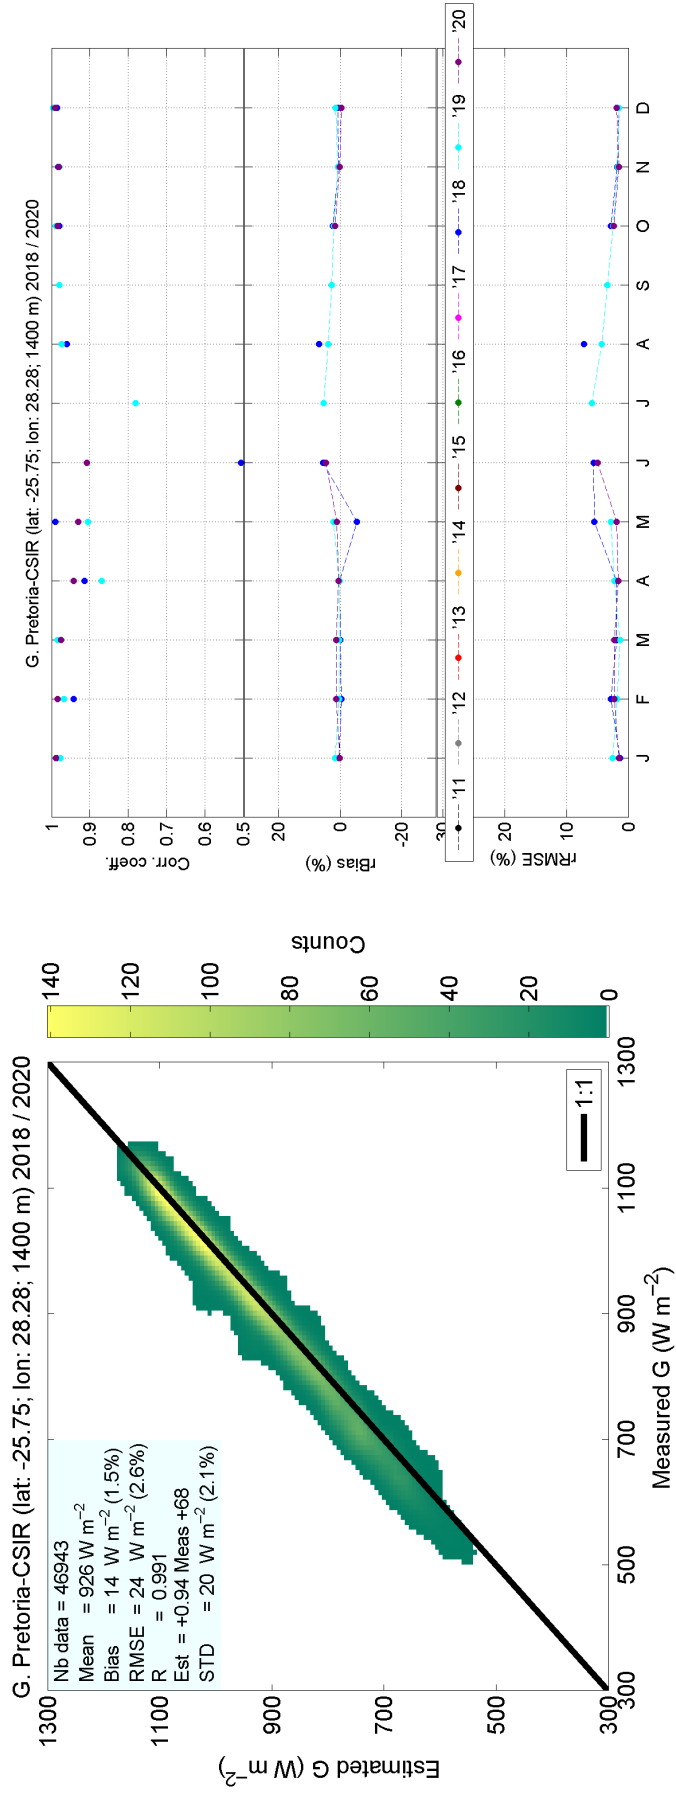

G. Pretoria-CSIR (lat: -25.75; lon: 28.28; 1400 m) 2018 / 2020

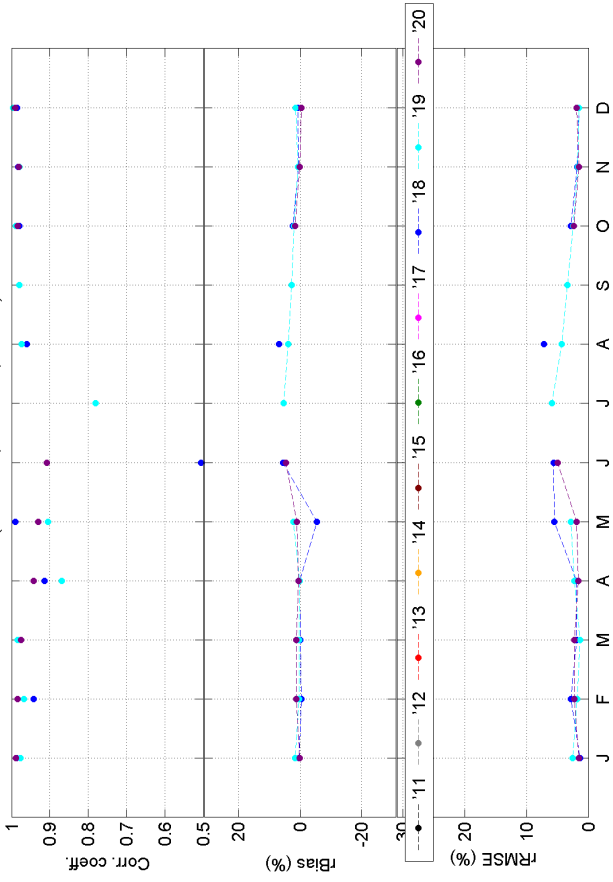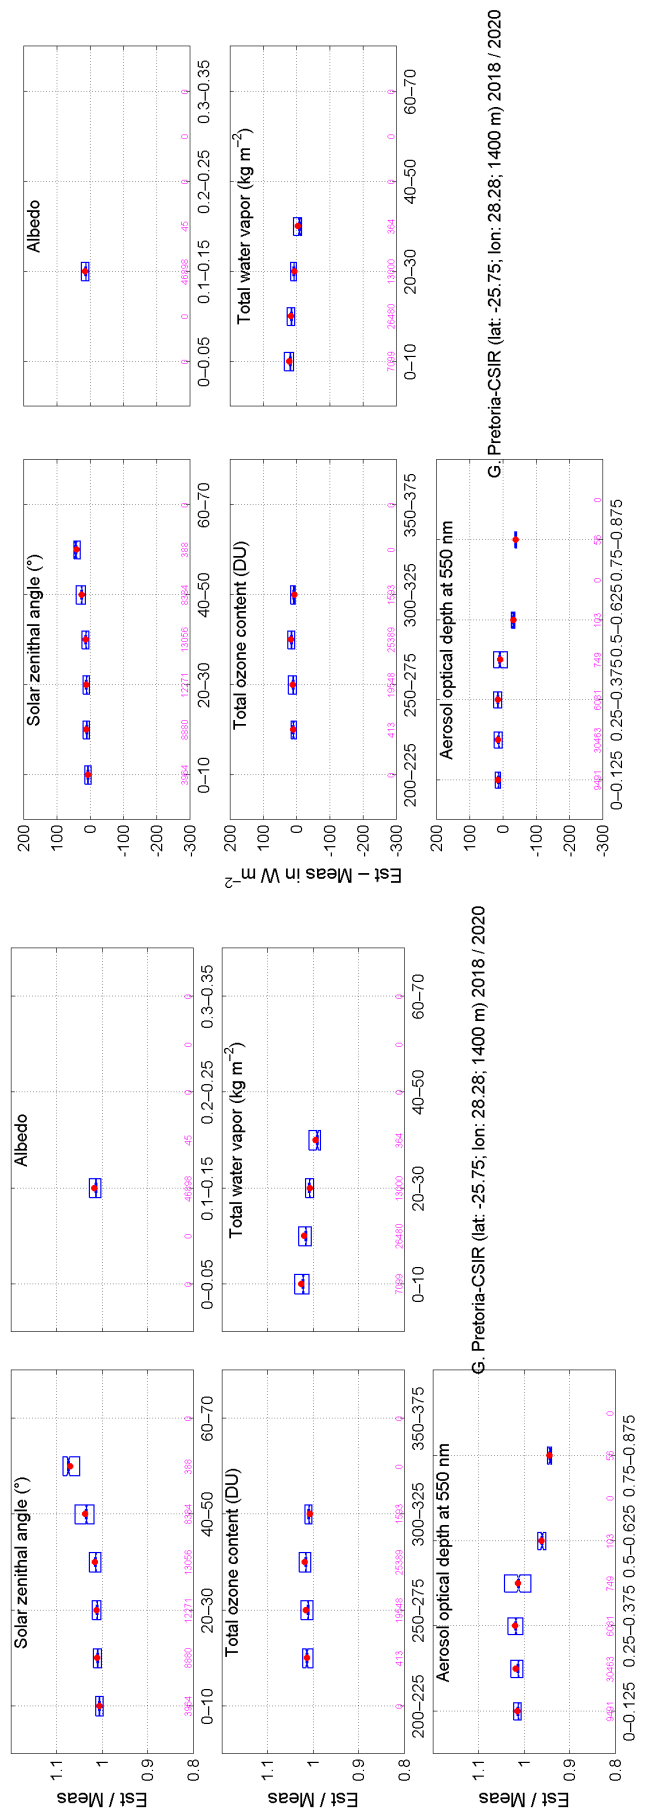

Figure S117: Comparison on global irradiance at Pretoria-CSIR

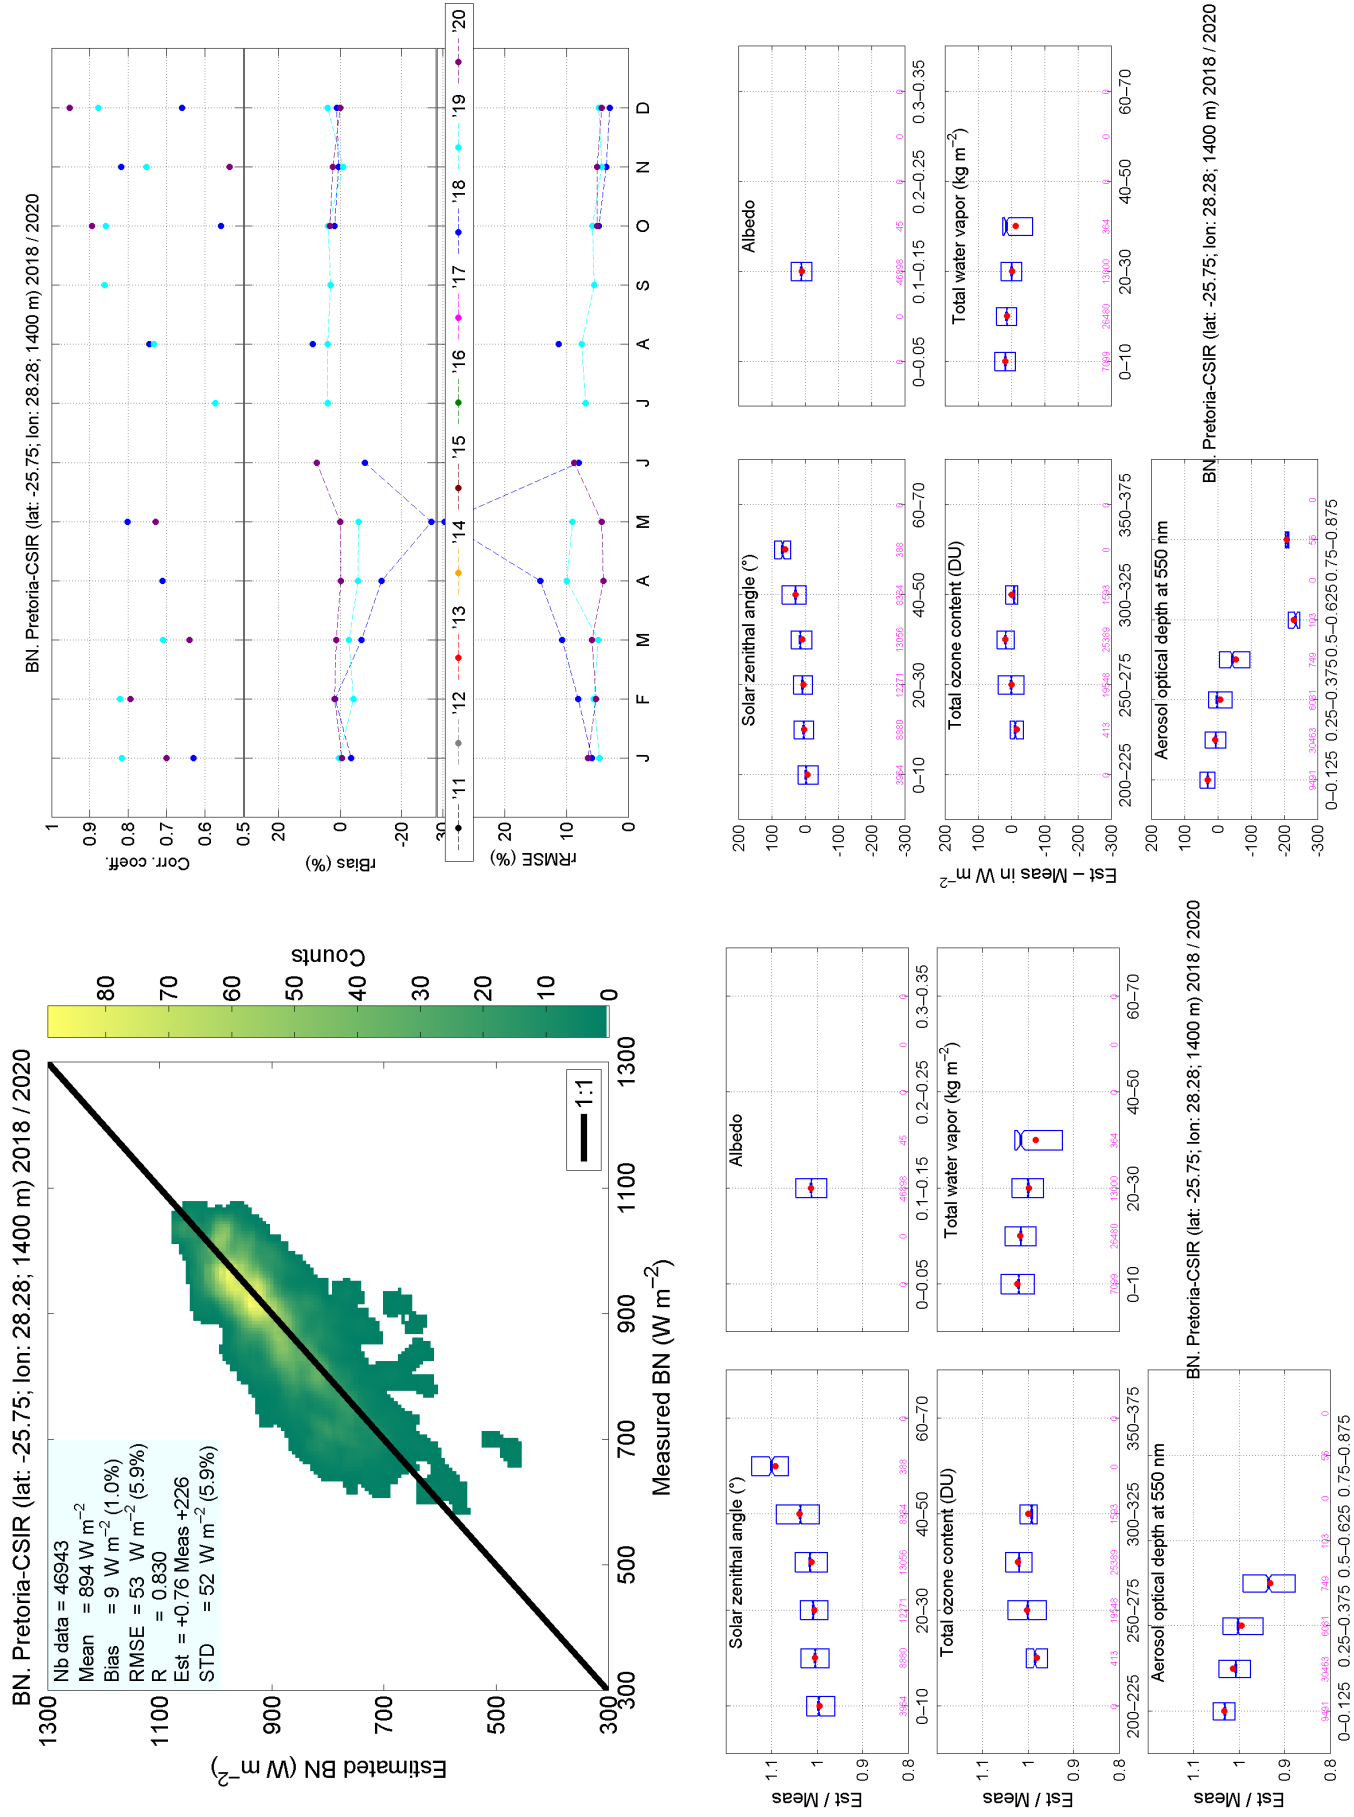

Figure S118: Comparison on direct component at normal irradiance at Pretoria-CSIR



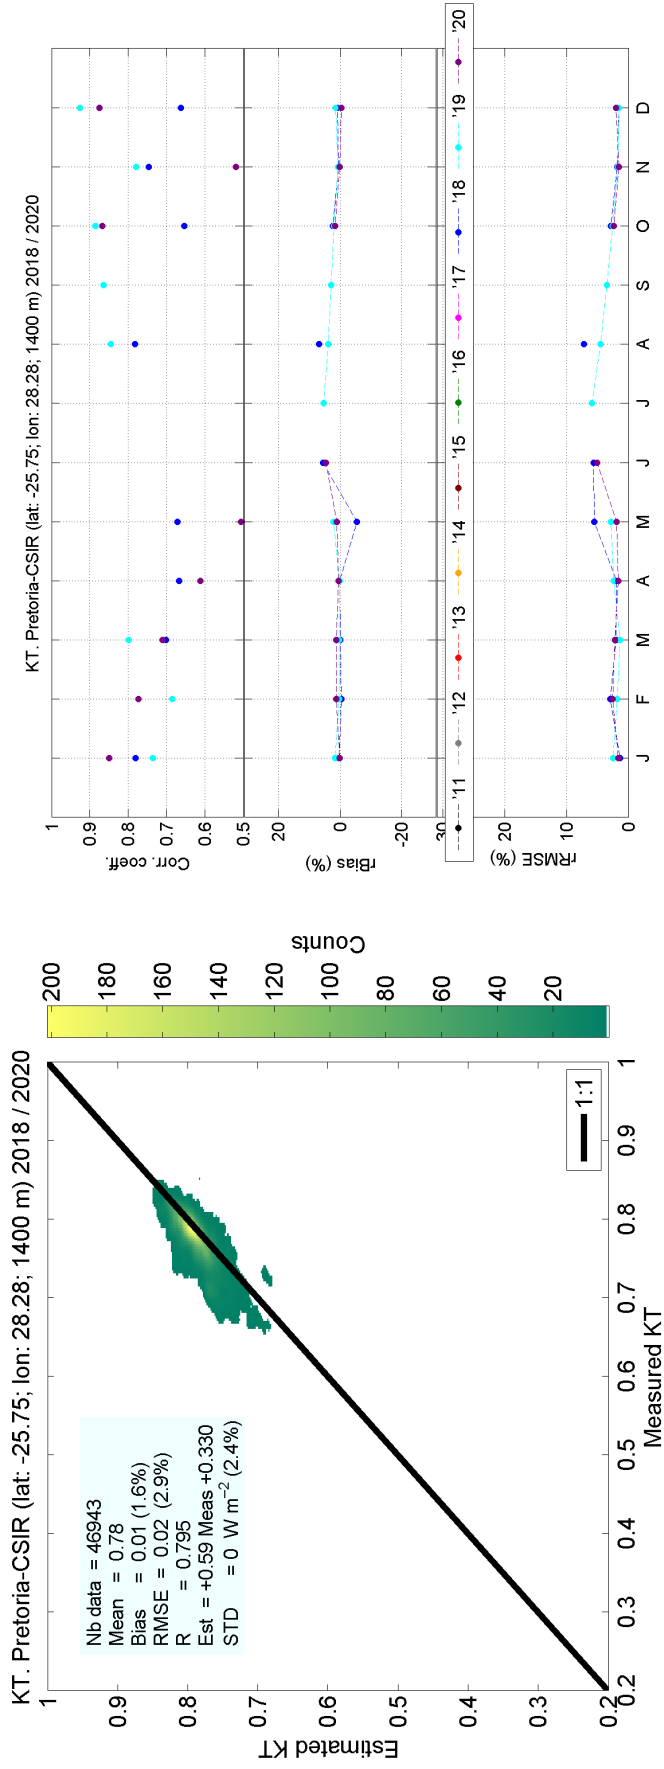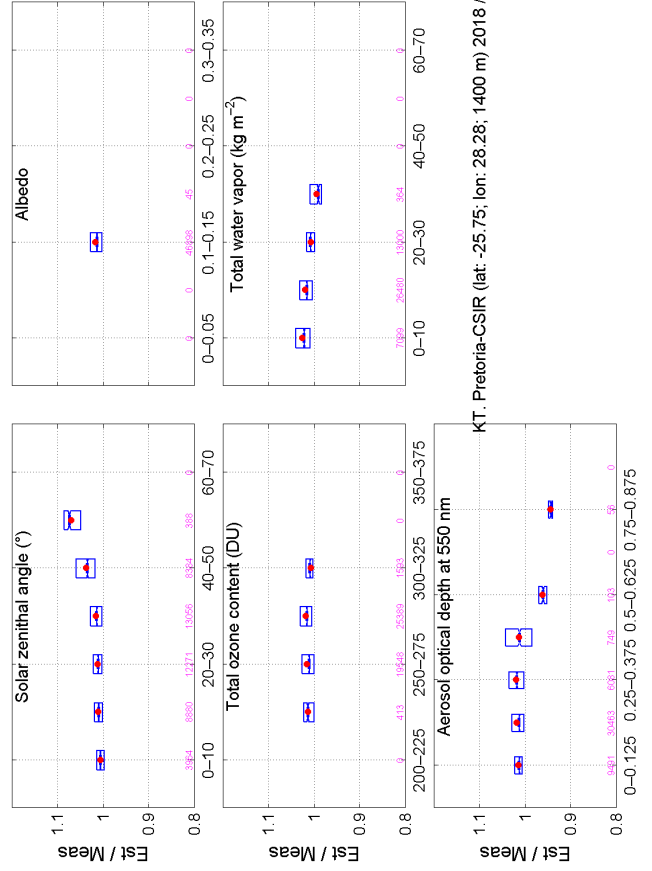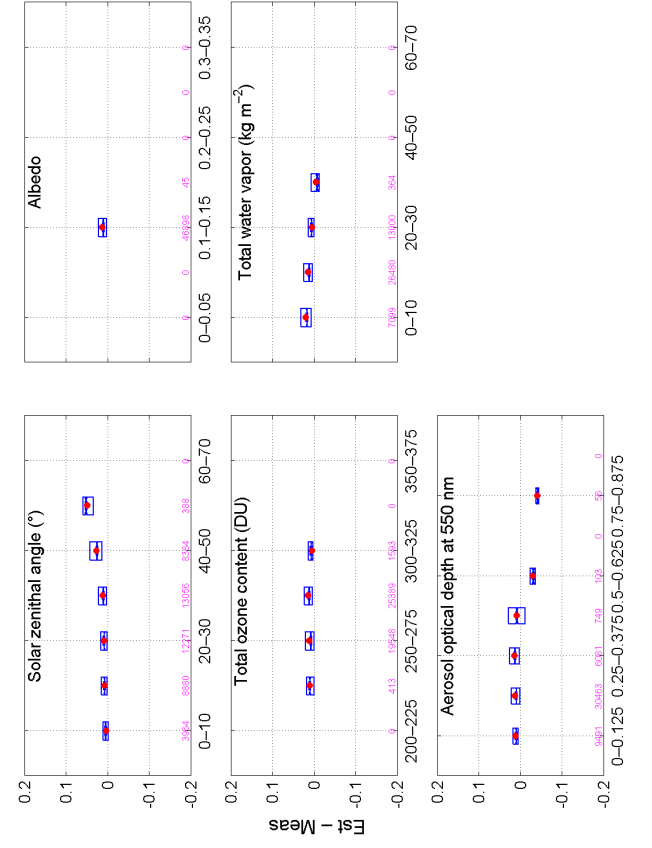

Figure S119: Comparison on clearness index at Pretoria-CSIR

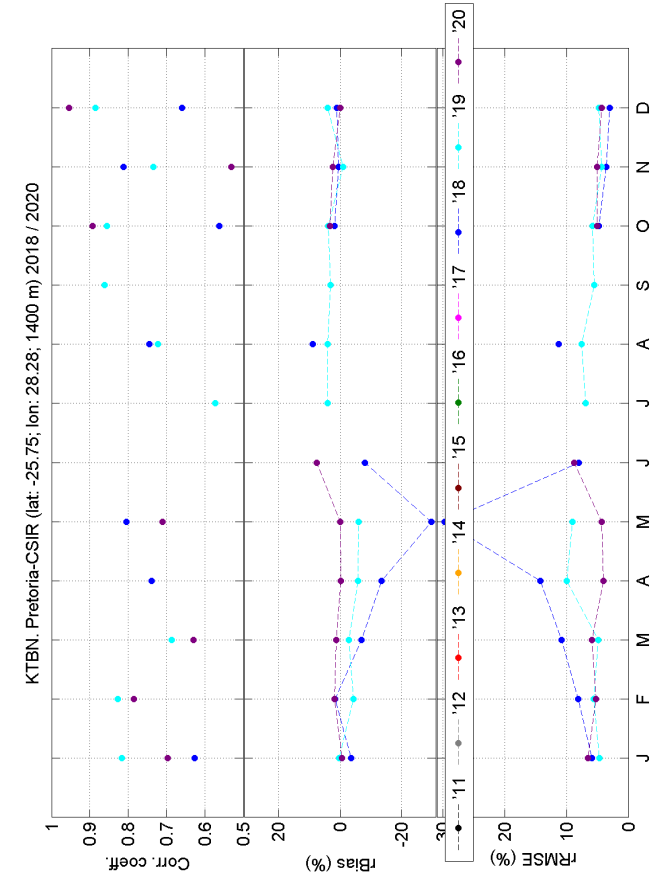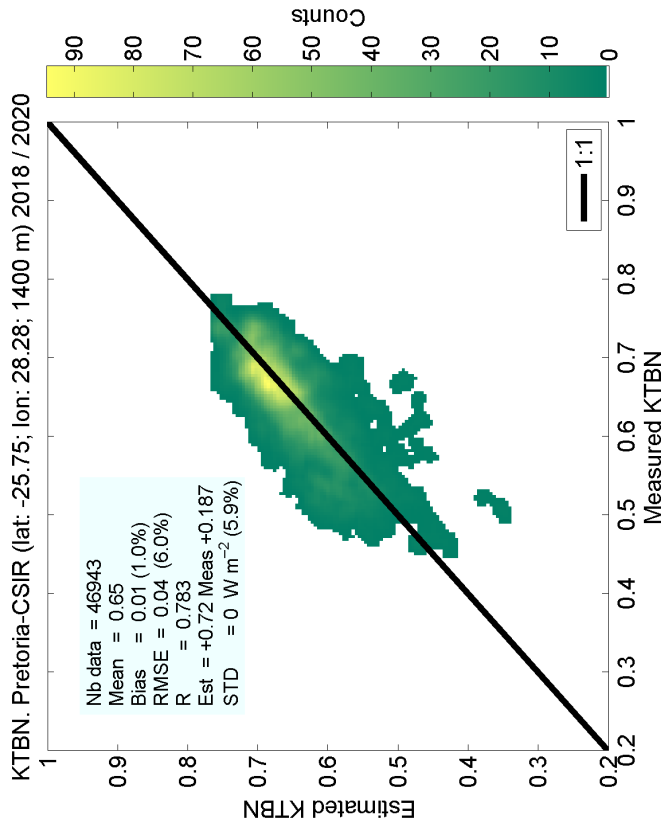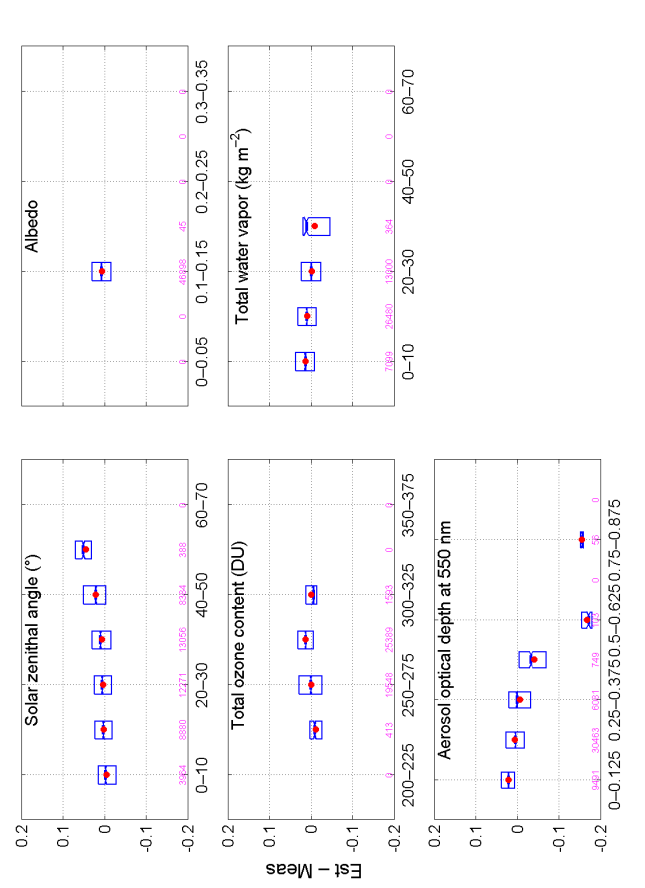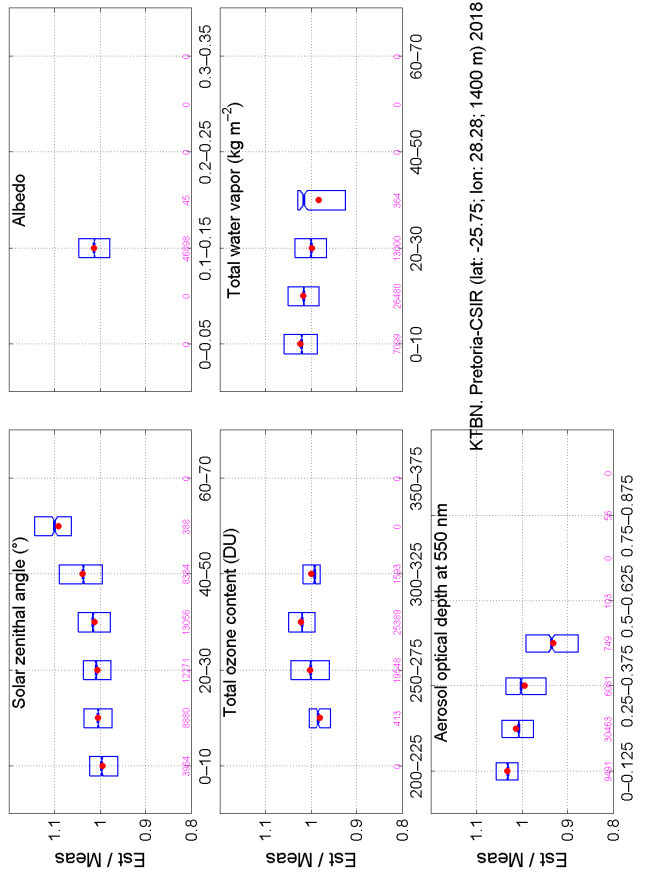

Figure S120: Comparison on direct clearness index at Pretoria-CSIR

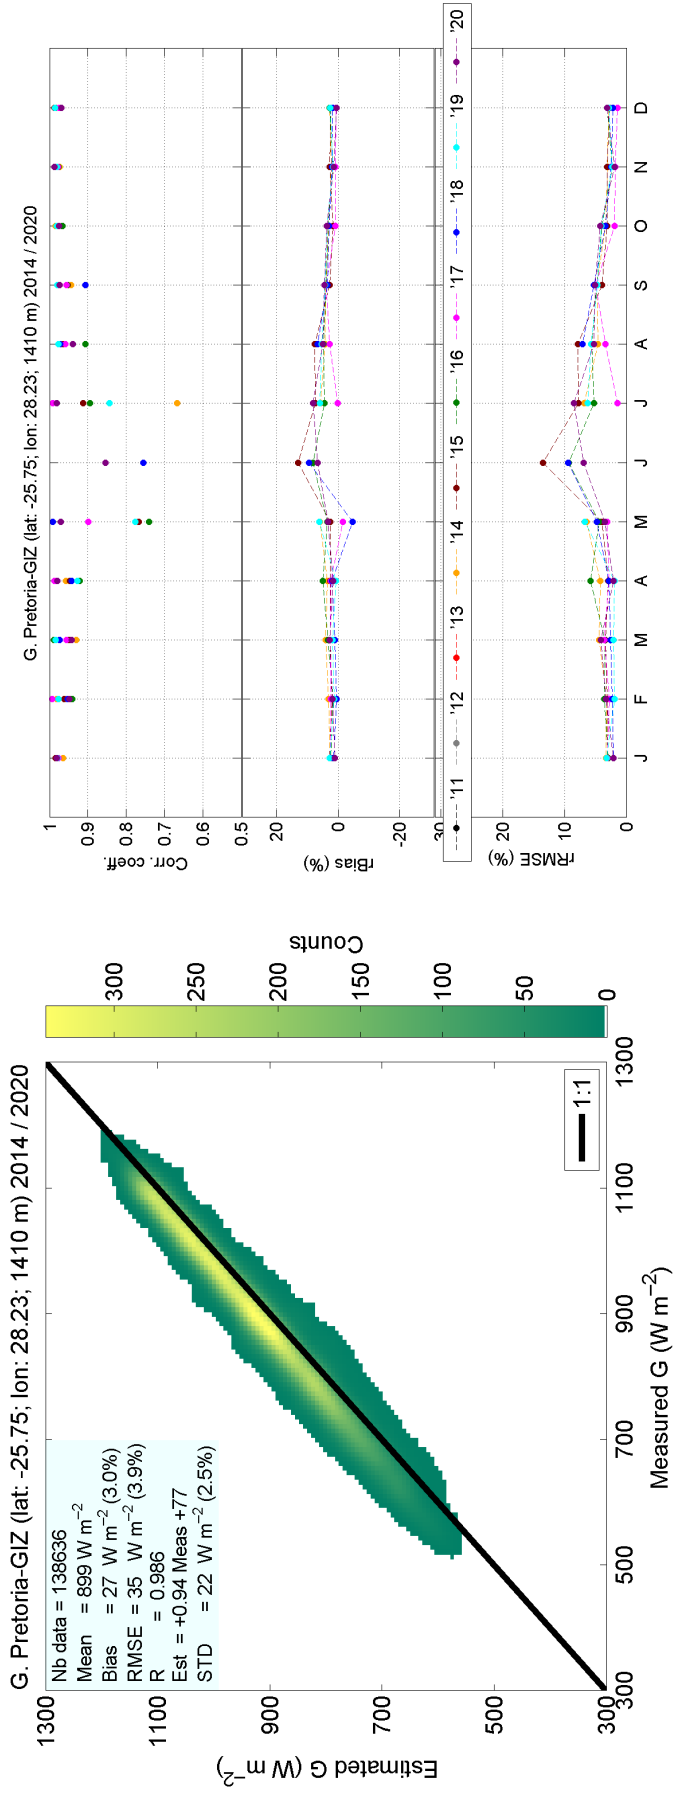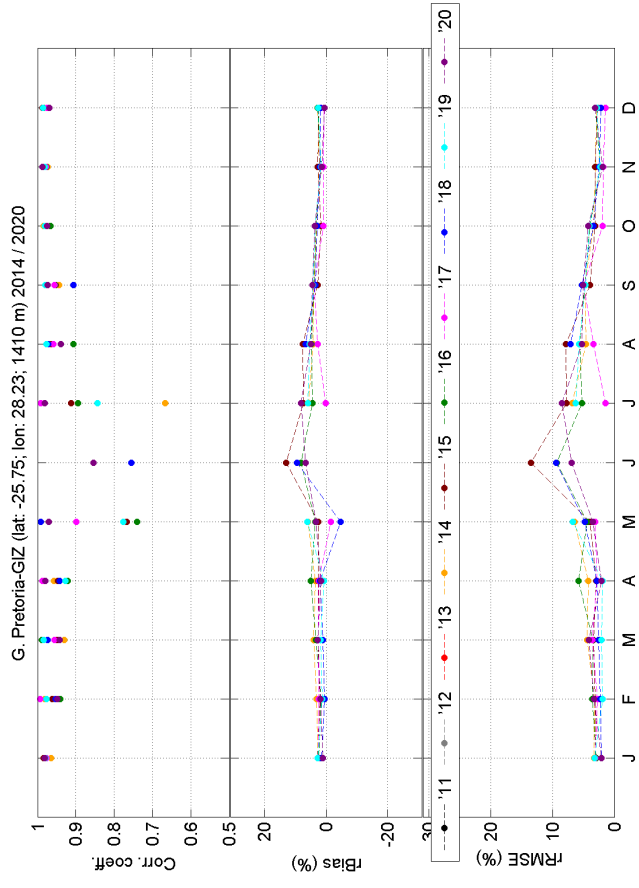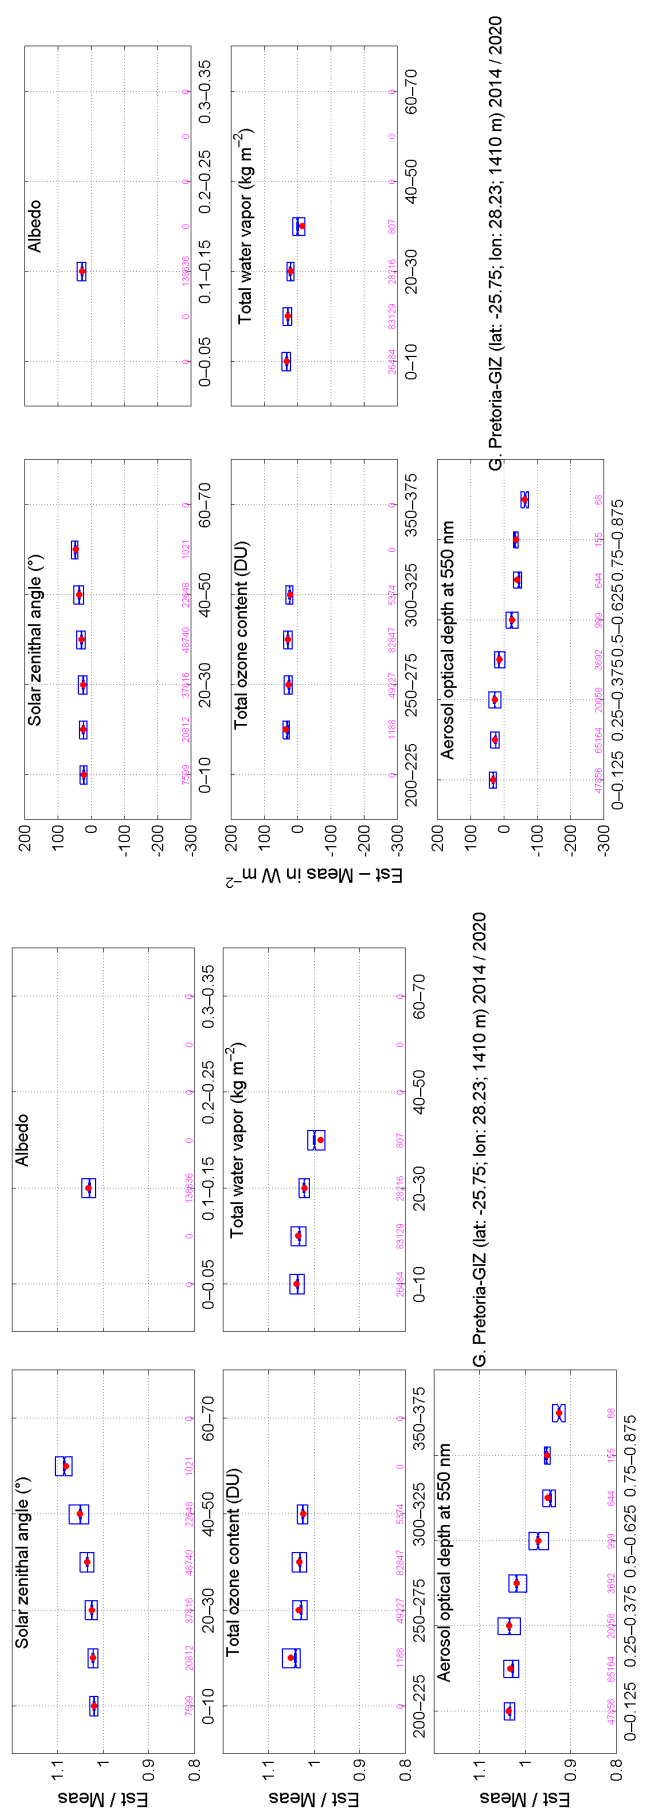

Figure S121: Comparison on global irradiance at Pretoria-GIZ

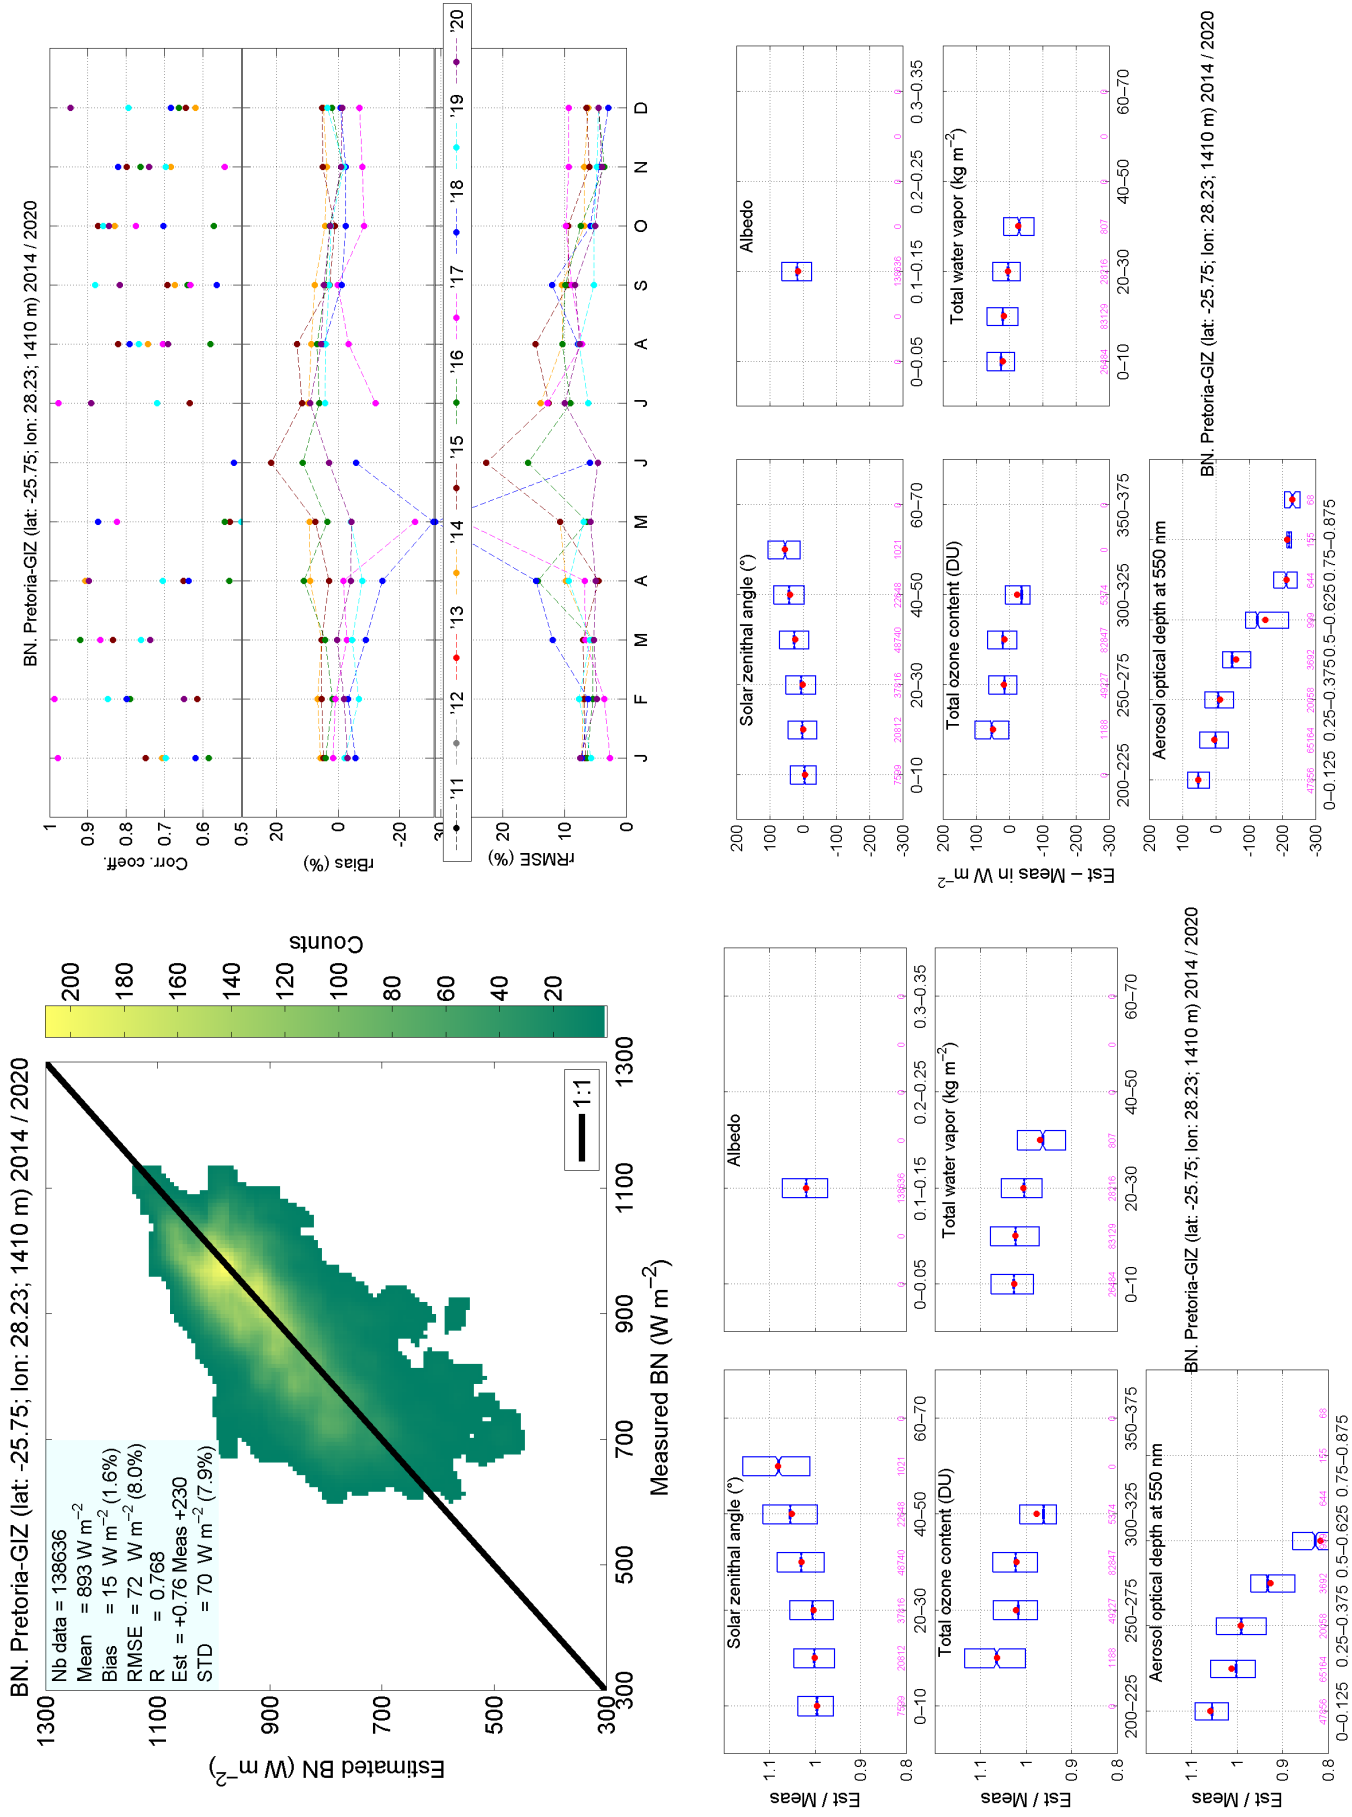

Figure S122: Comparison on direct component at Pretoria-GIZ

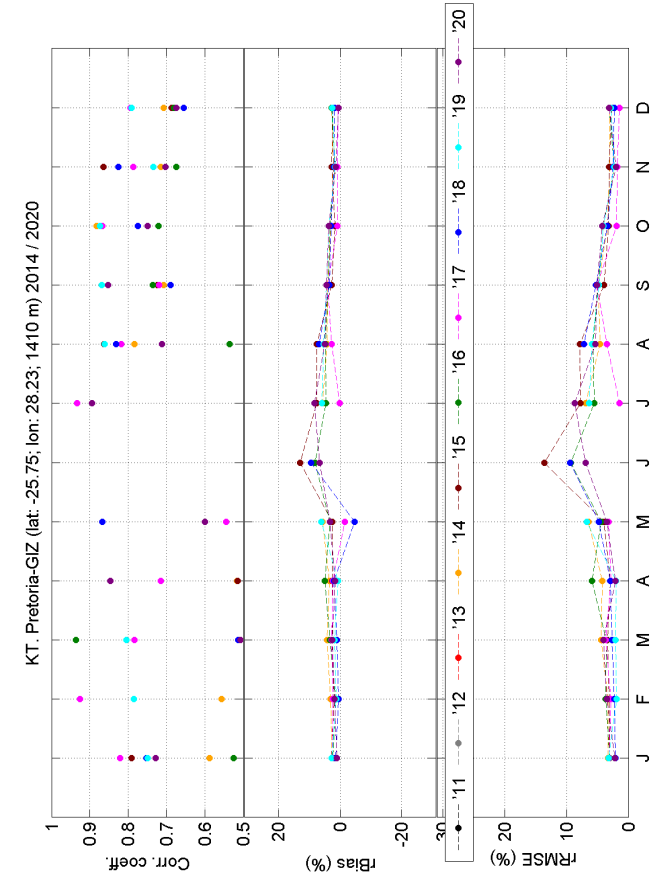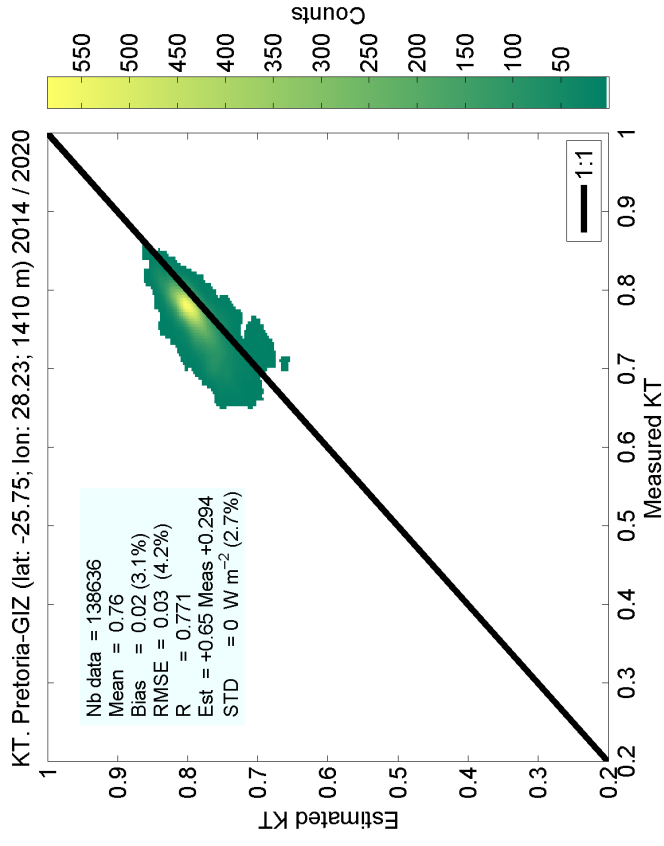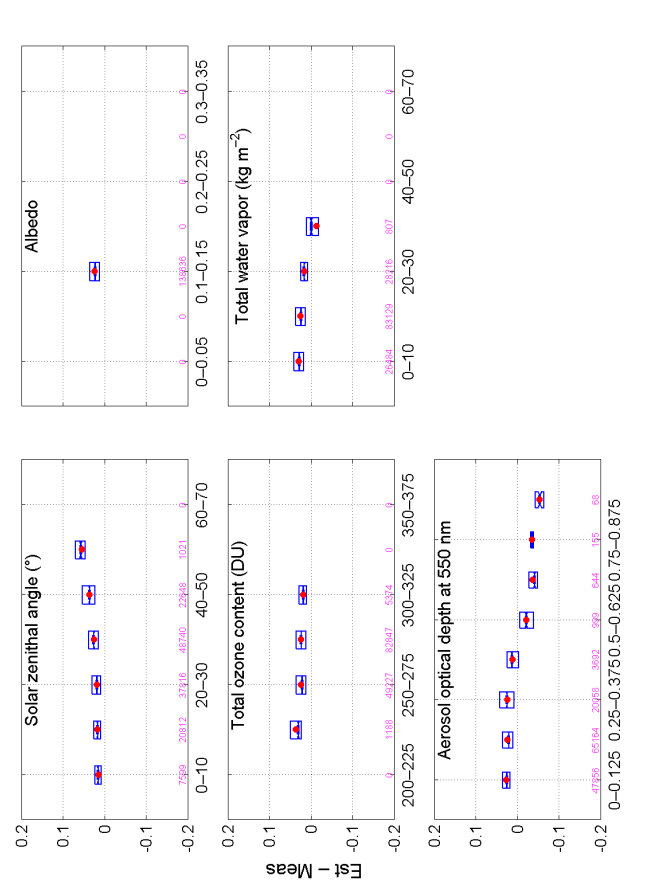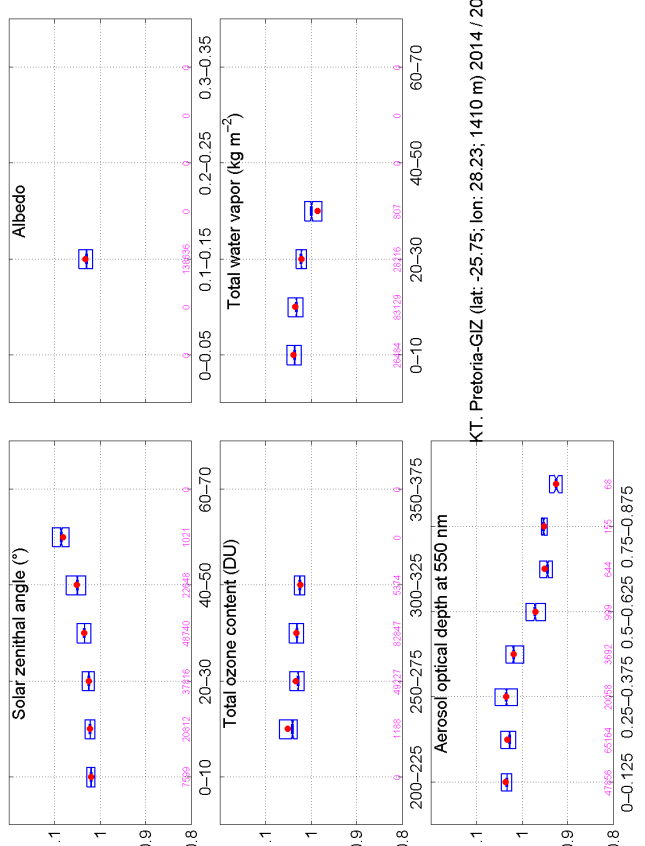

Figure S123: Comparison on clearness index at Pretoria-GIZ

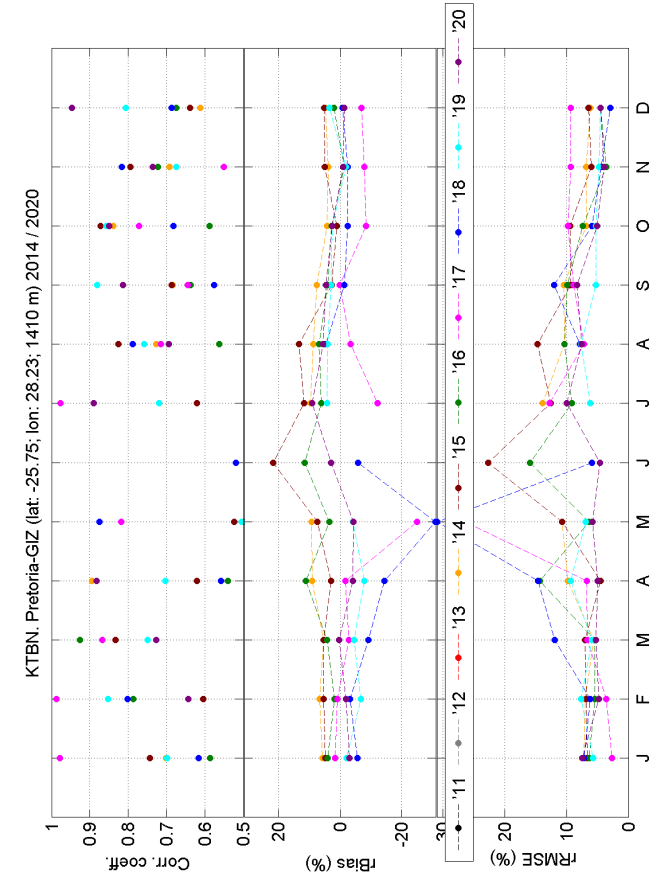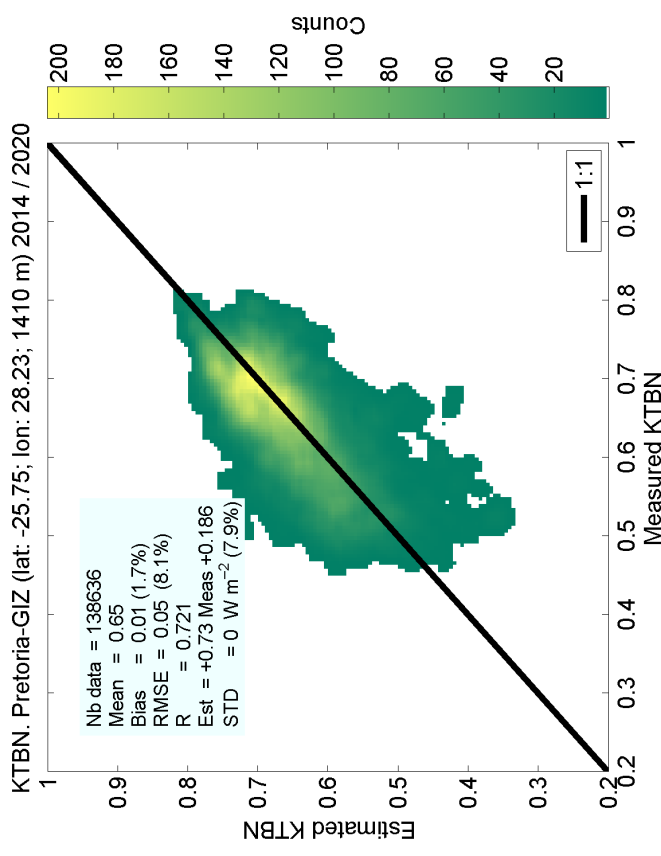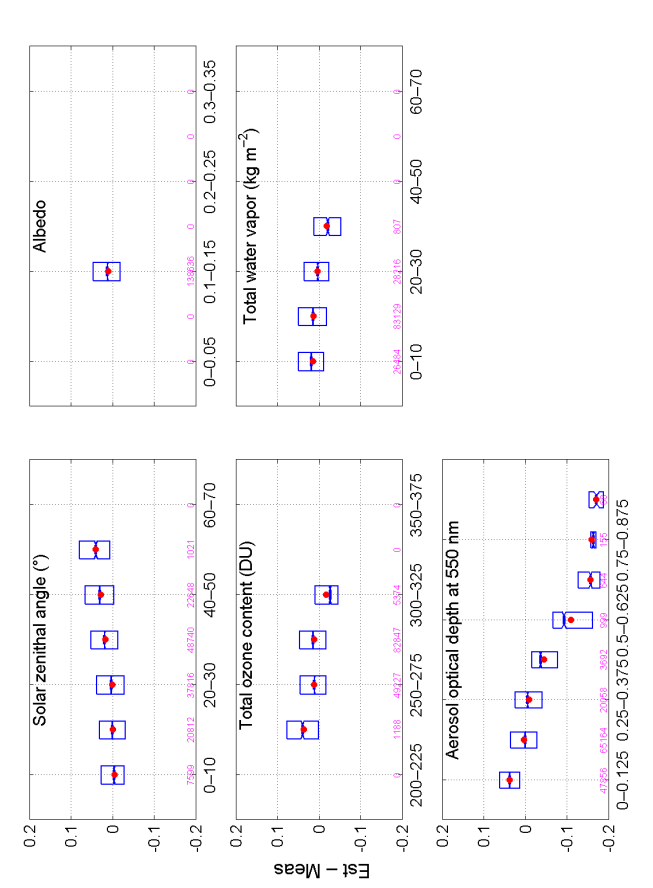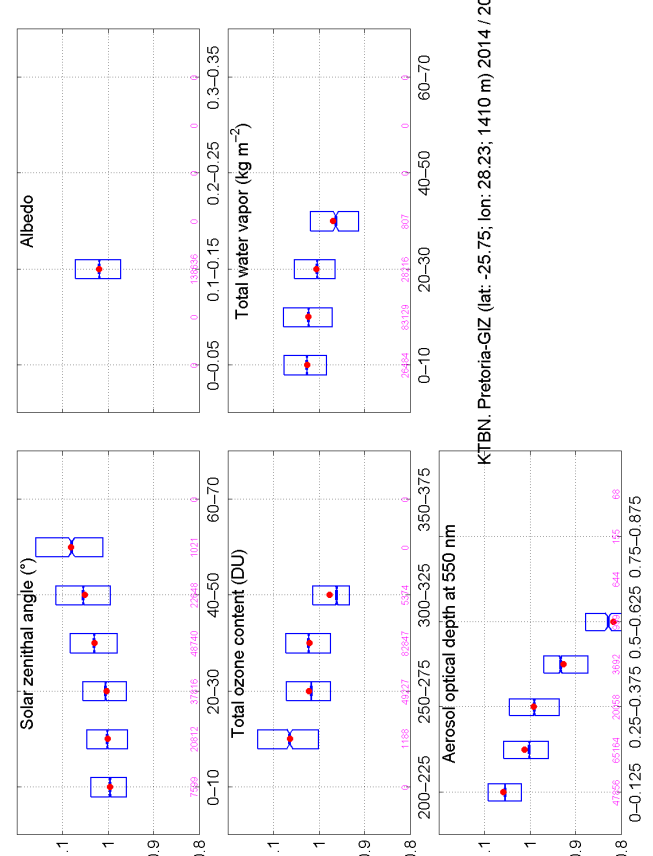

Figure S124: Comparison on direct clearness index at Pretoria-GIZ

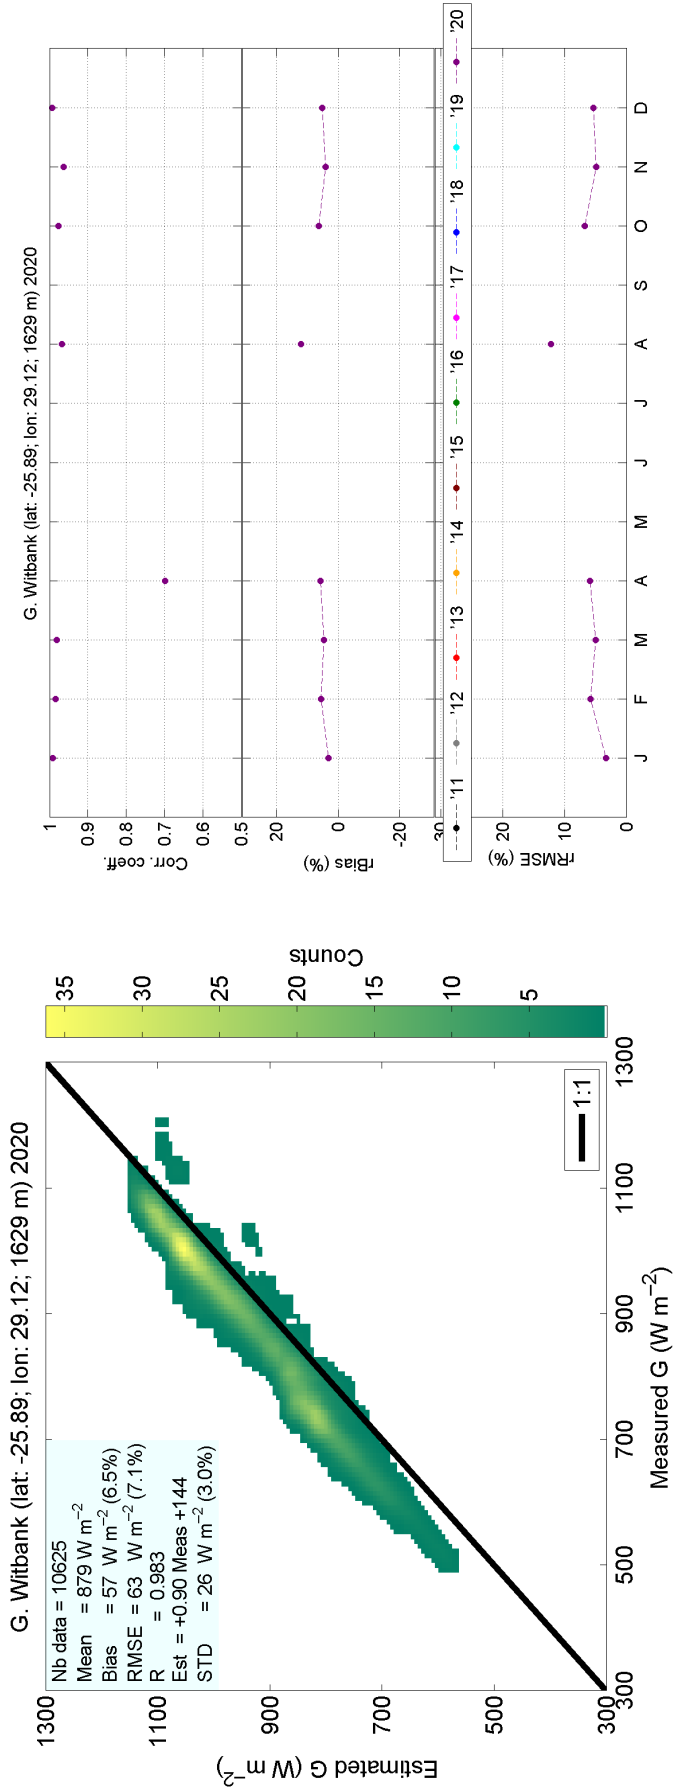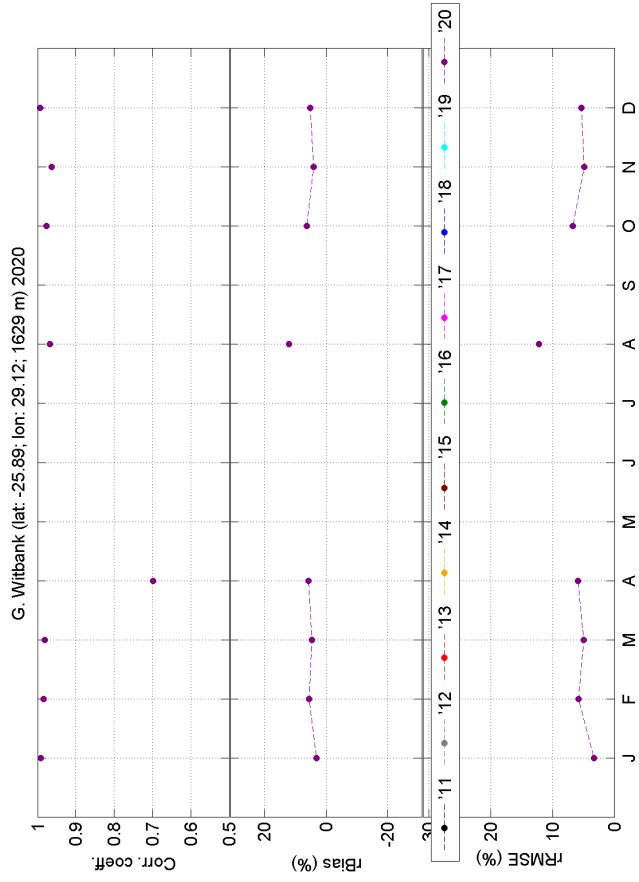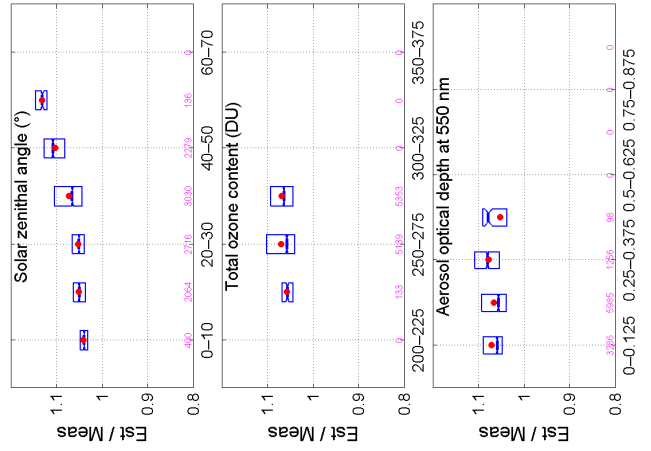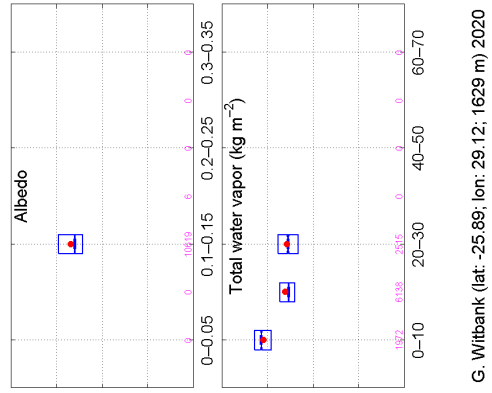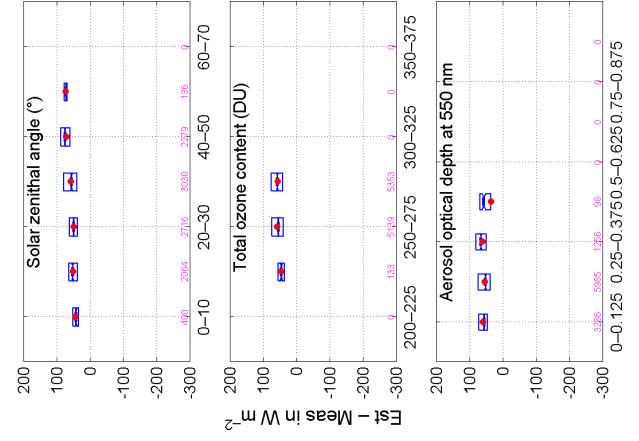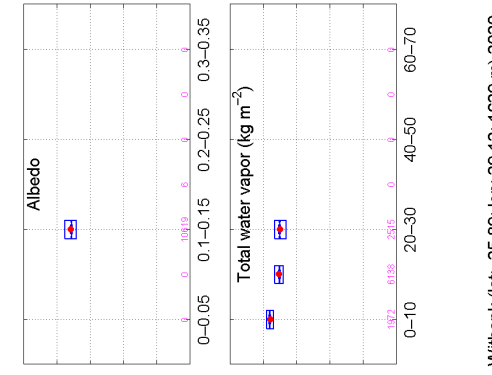

Figure S125: Comparison on global irradiance at Witbank

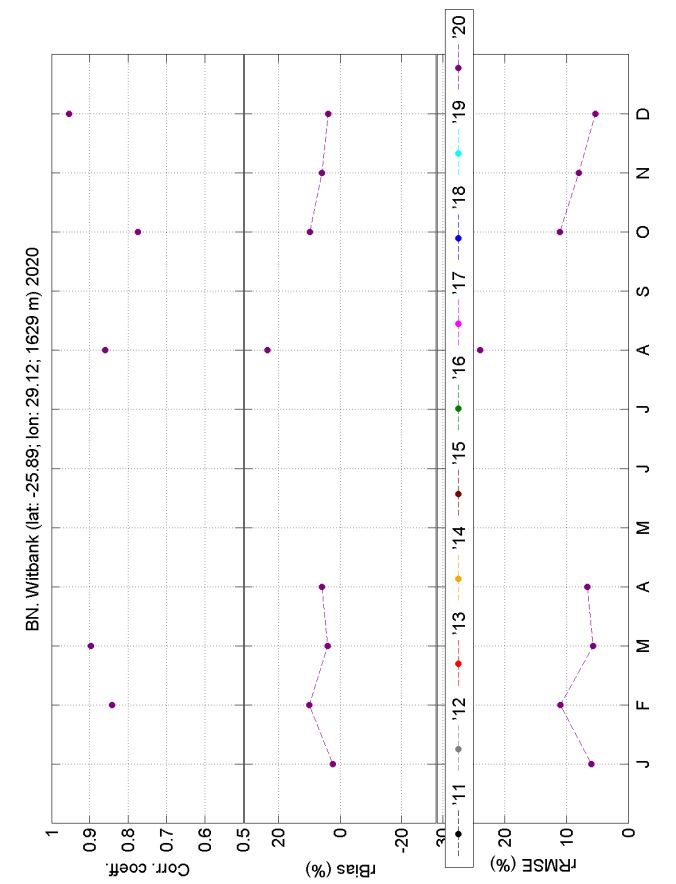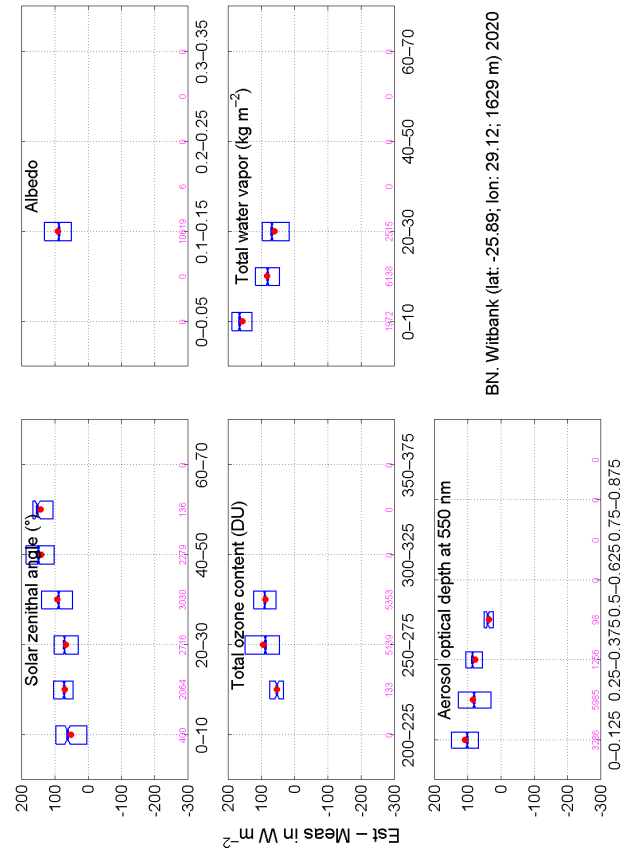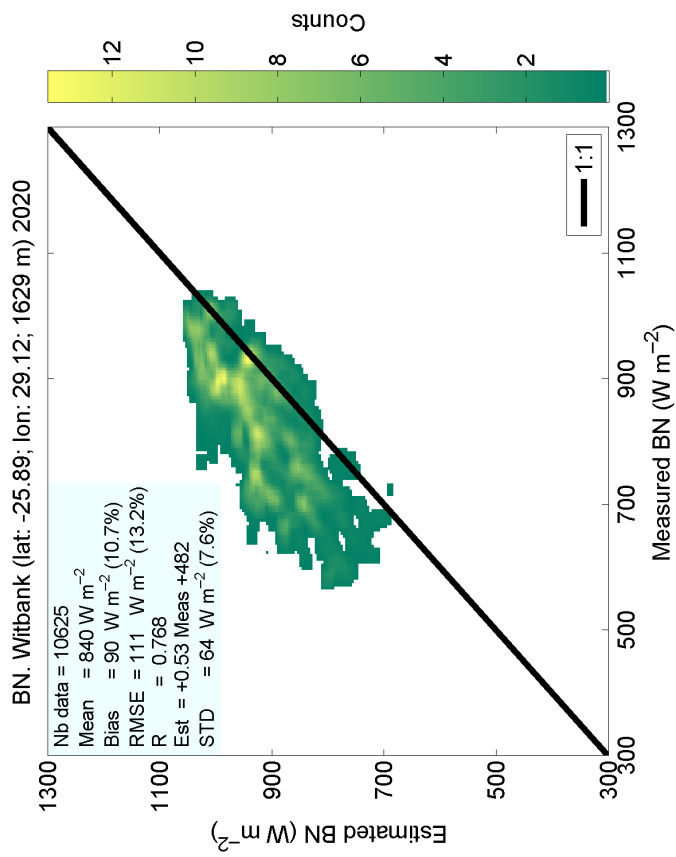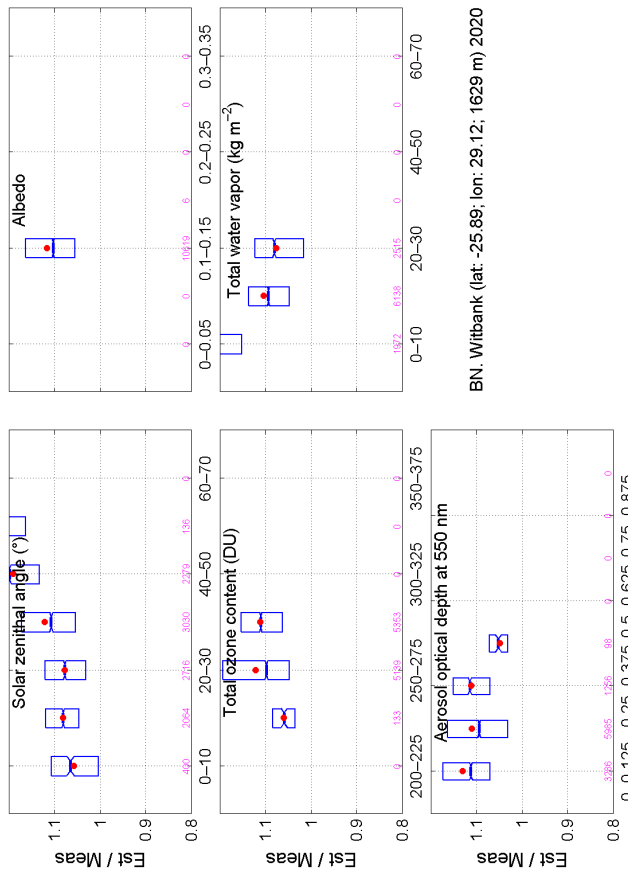

Figure S126: Comparison on direct component at normal irradiance at Witbank



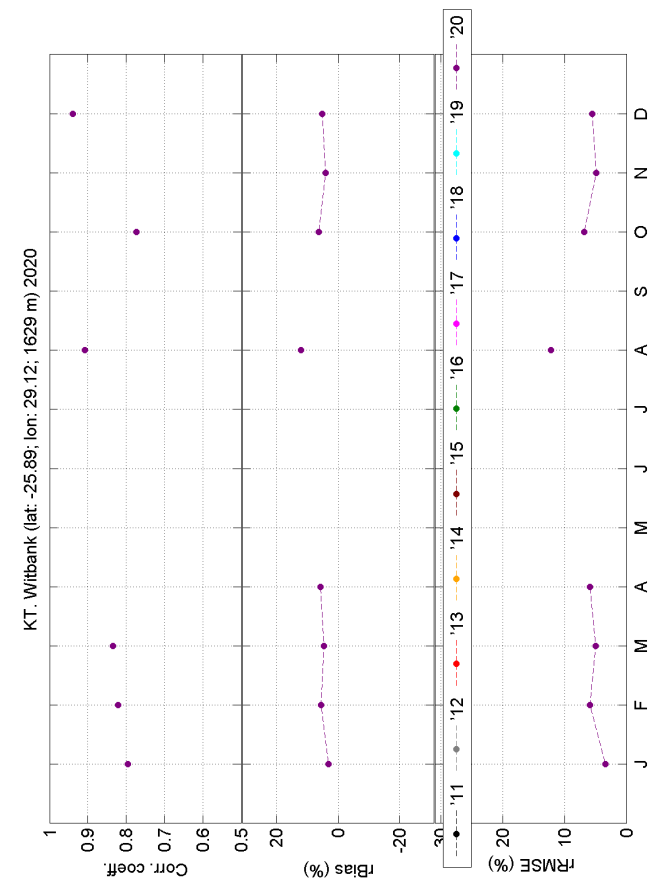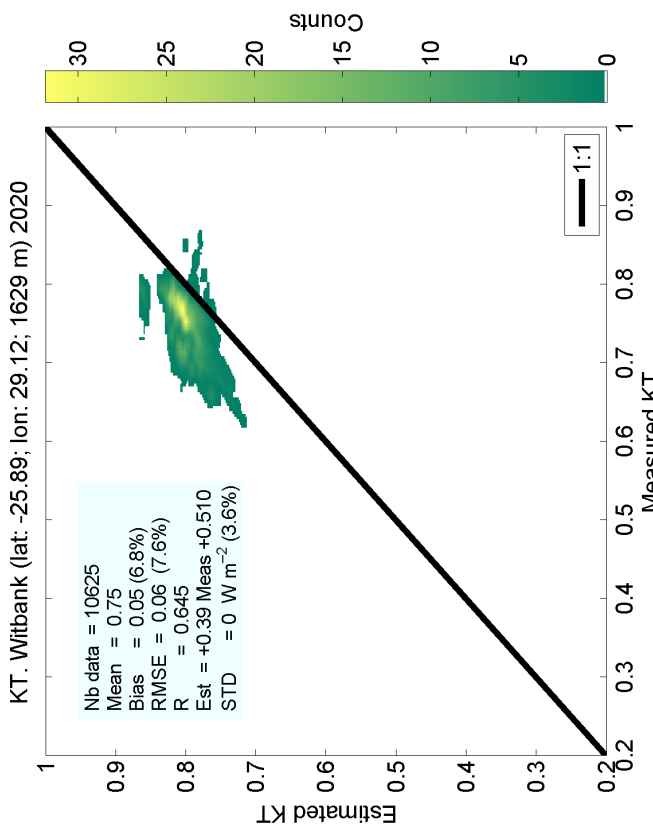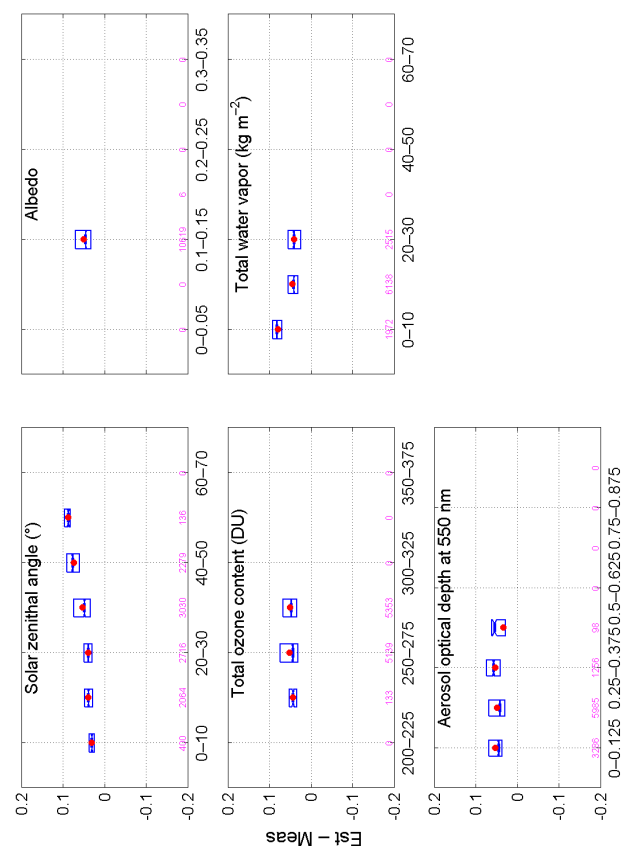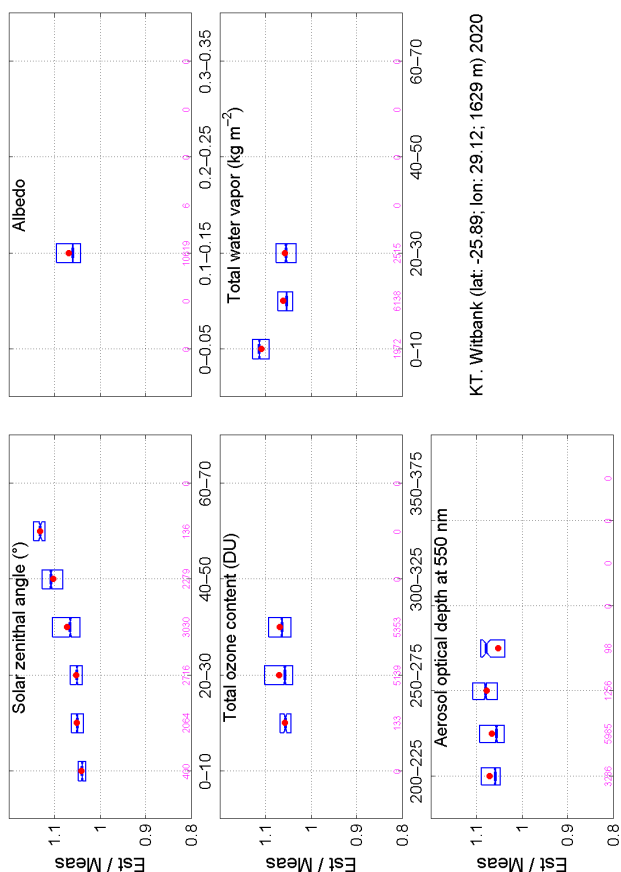

Figure S127: Comparison on clearness index at Witbank

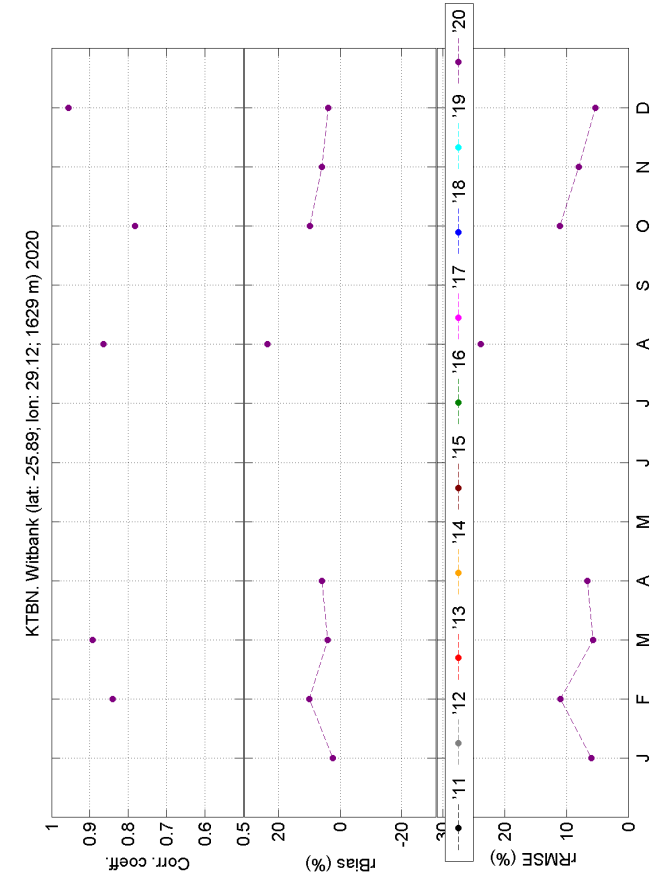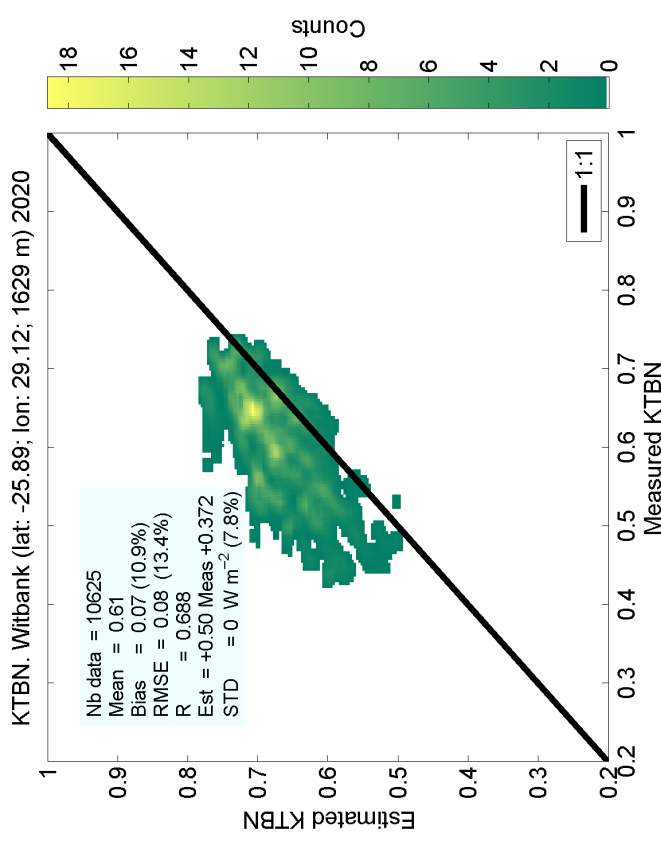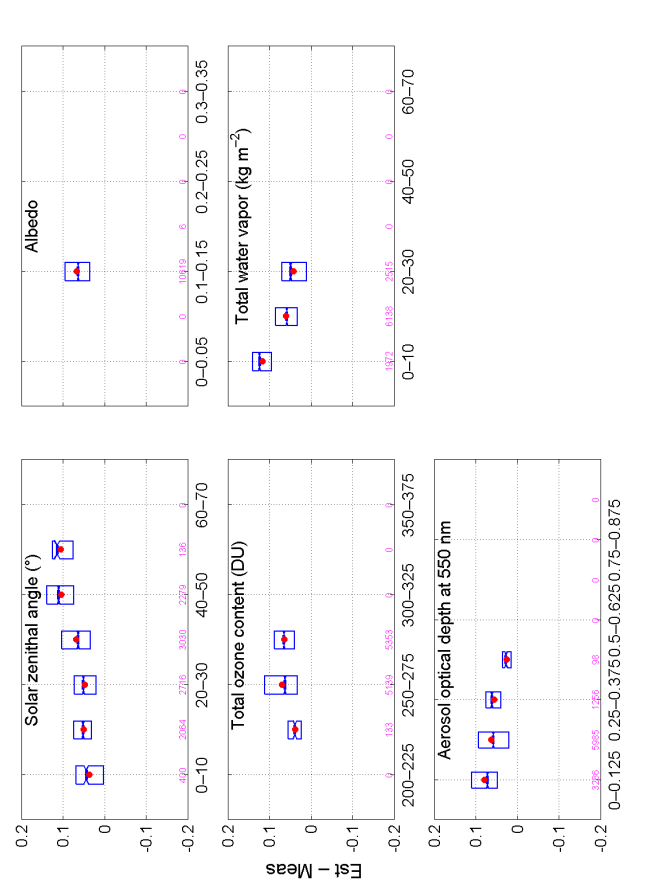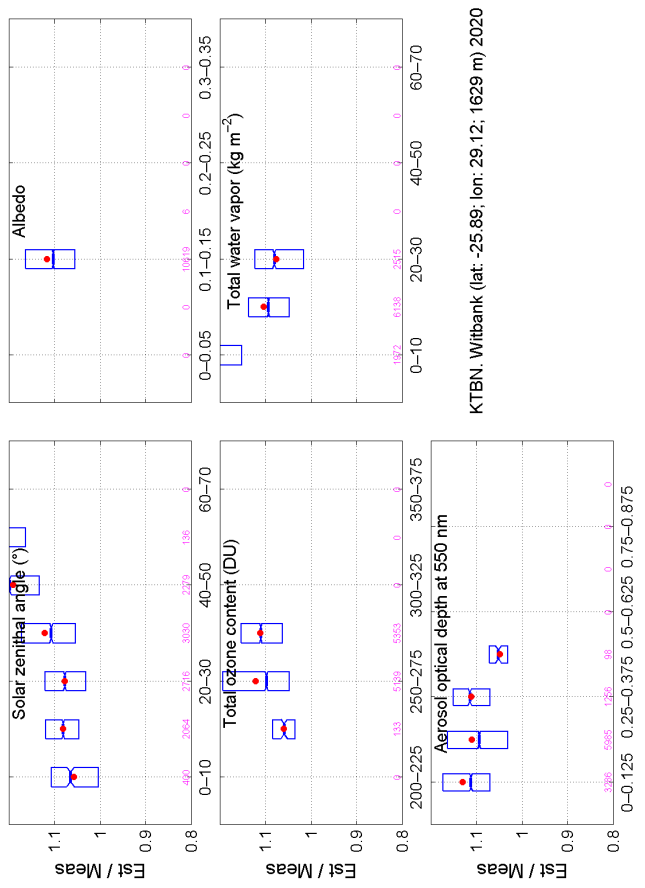

Figure S128: Comparison on direct clearness index at Witbank

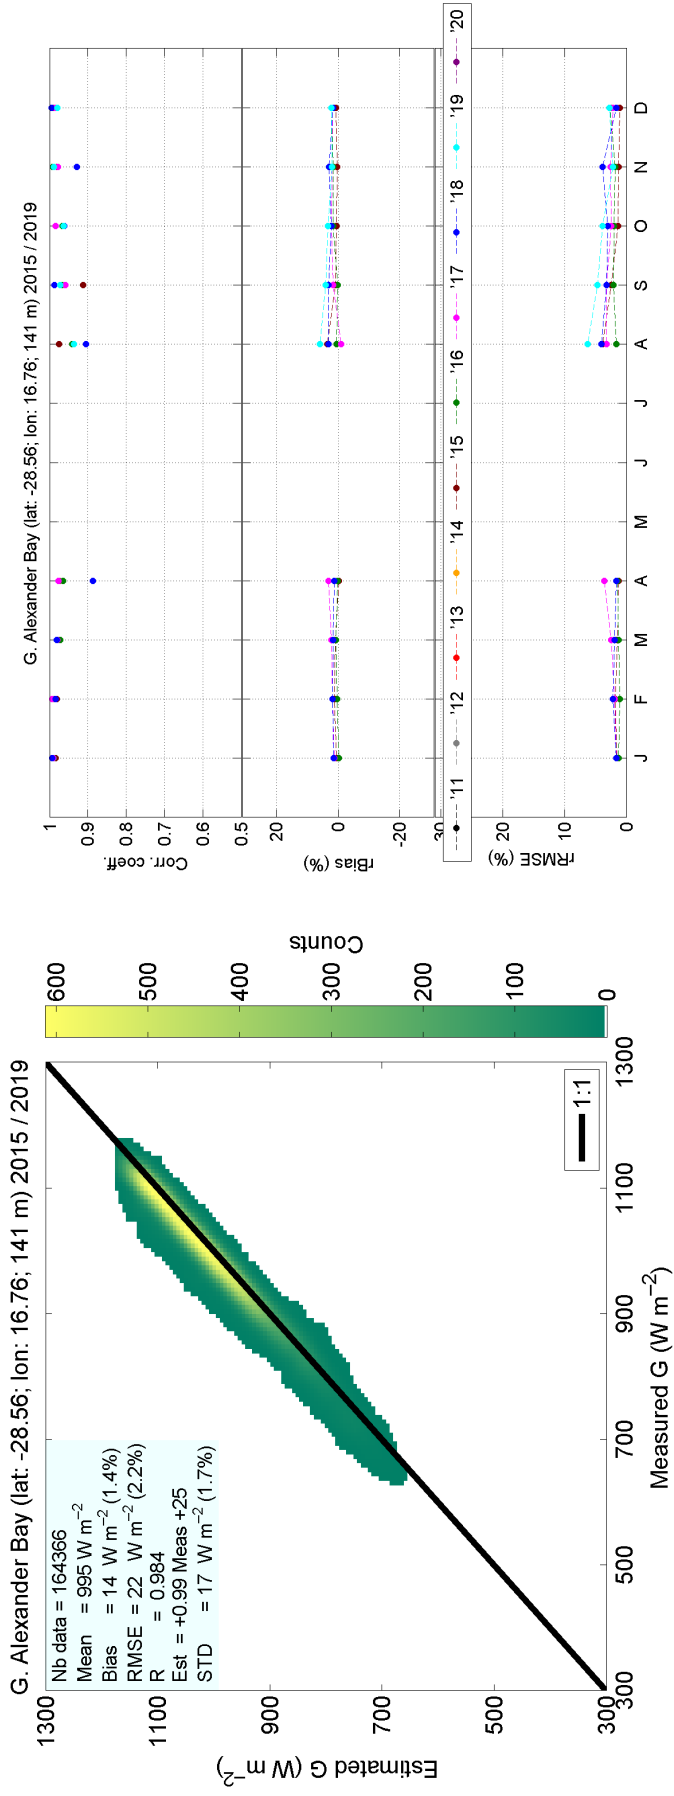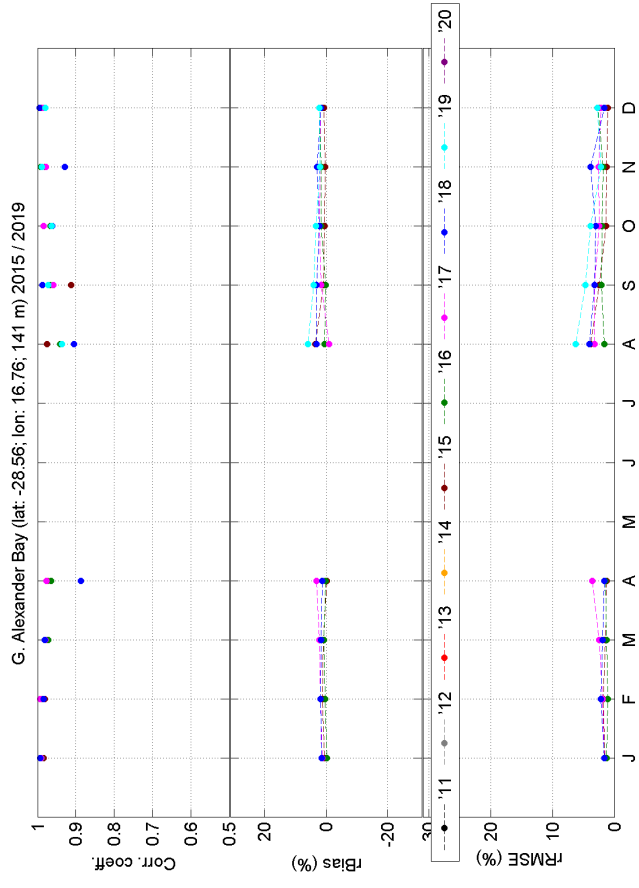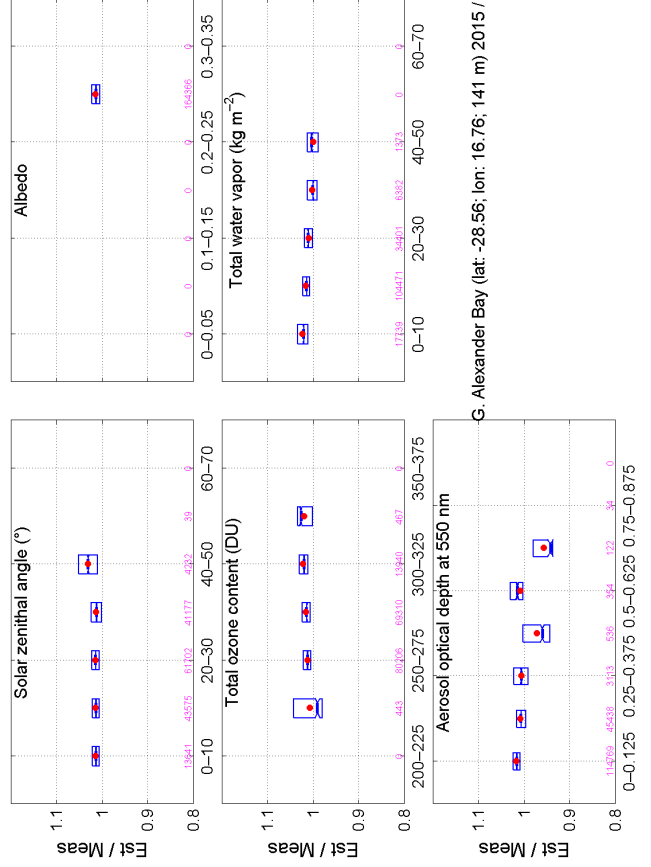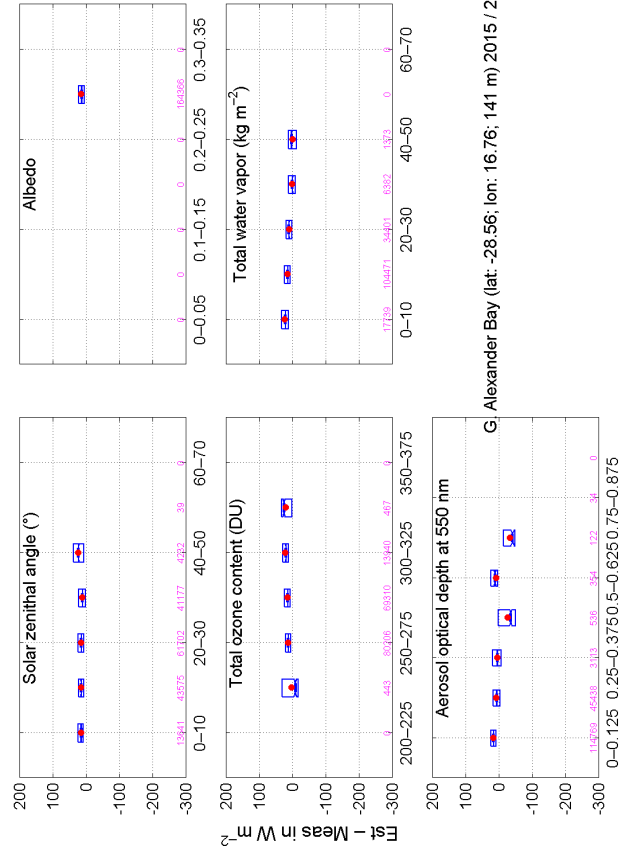

Figure S129: Comparison on global irradiance at Alexander Bay

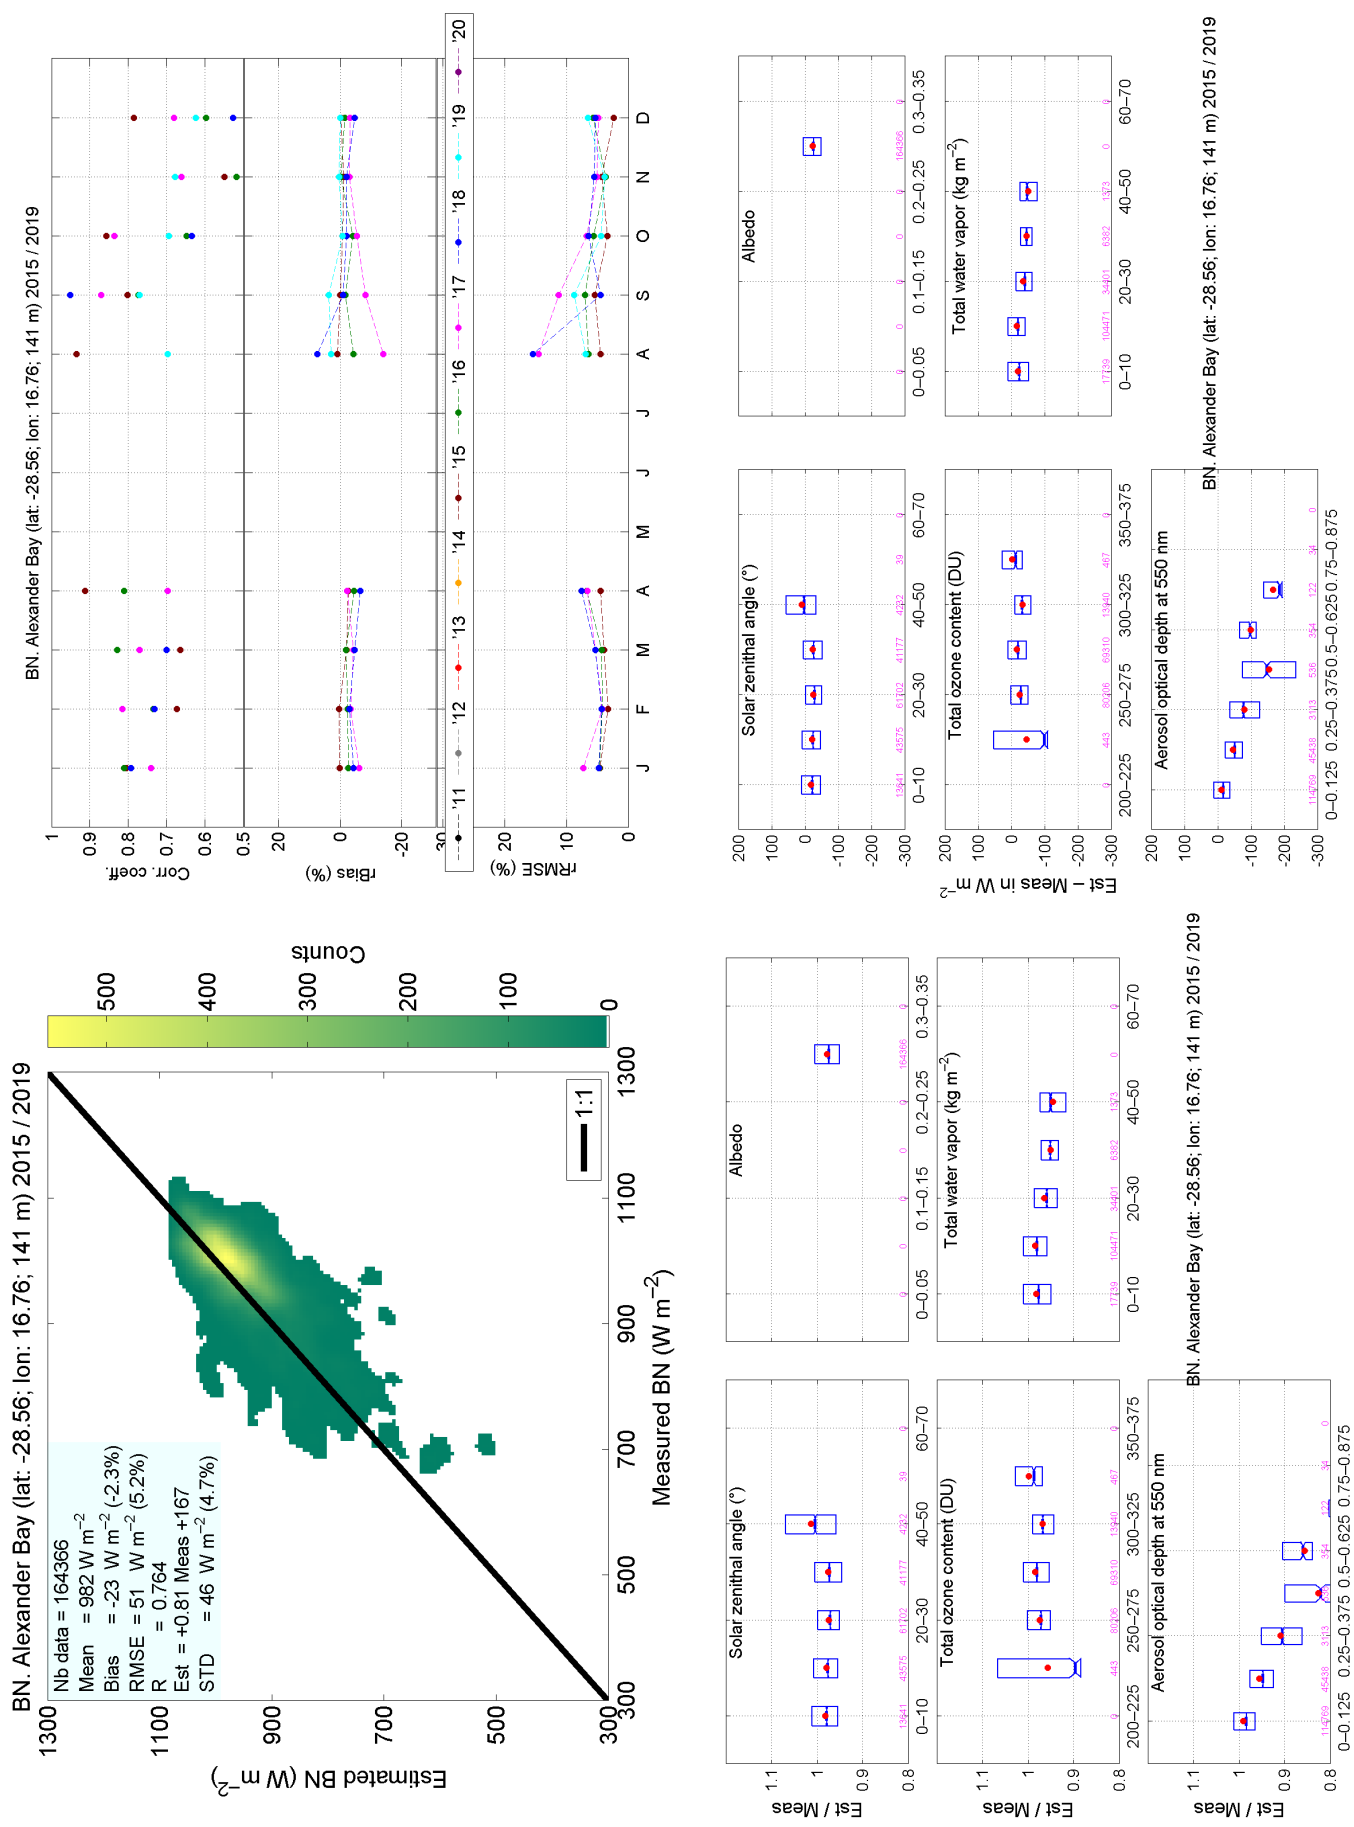

Figure S130: Comparison on direct component at normal irradiance at Alexander Bay

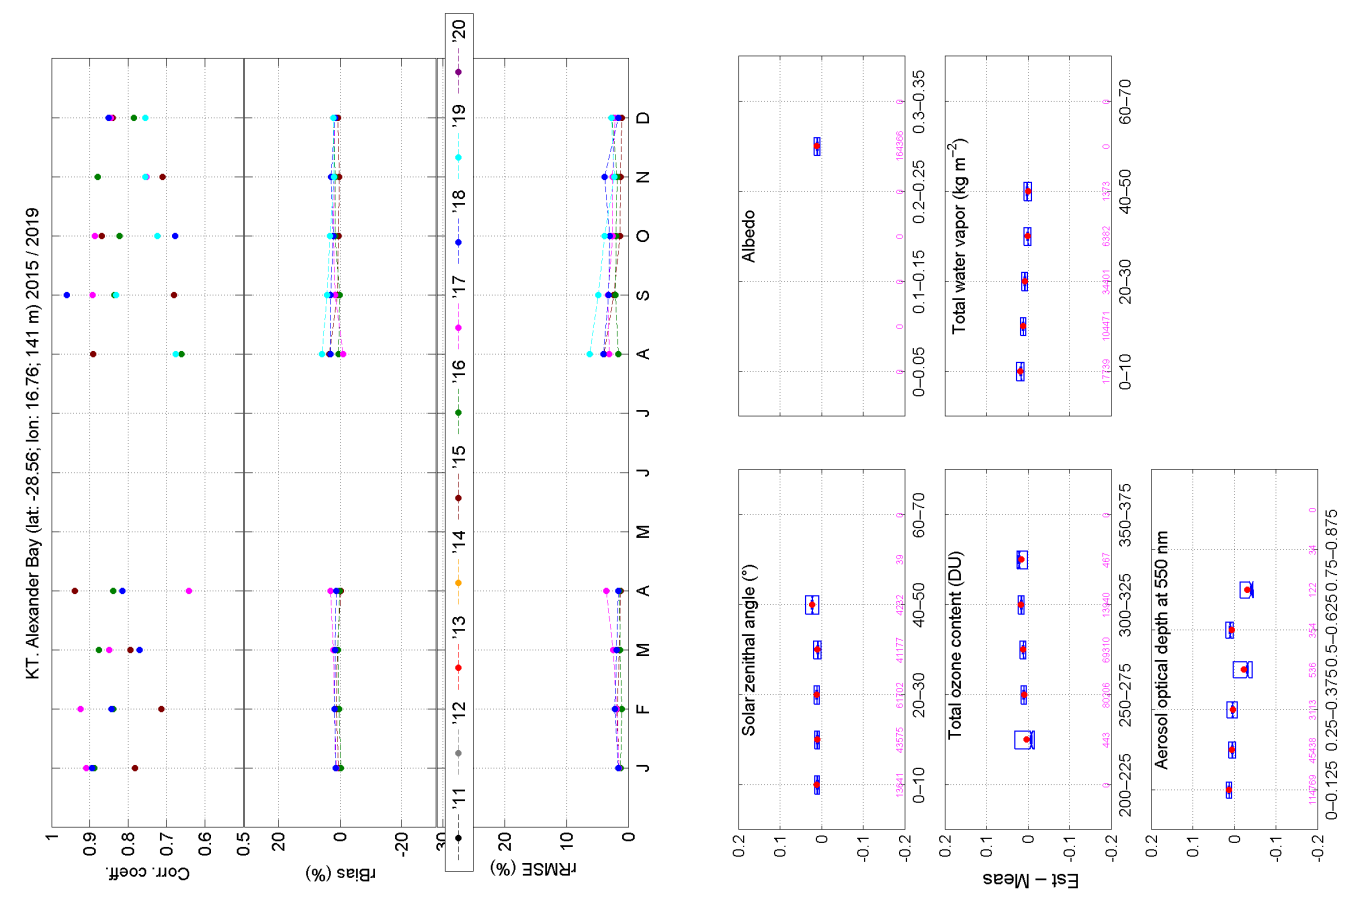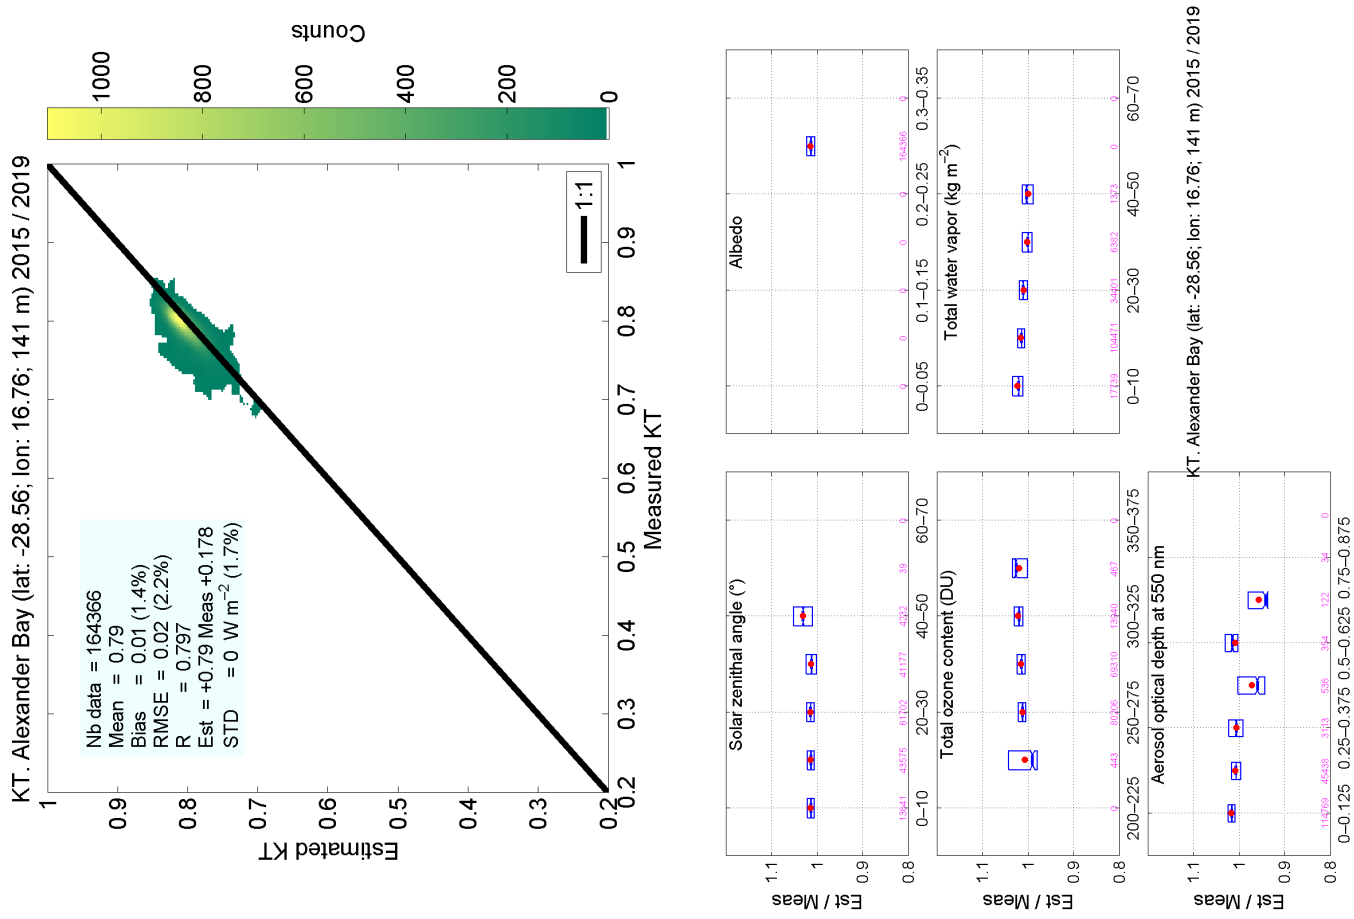

Figure S131: Comparison on clearness index at Alexander Bay

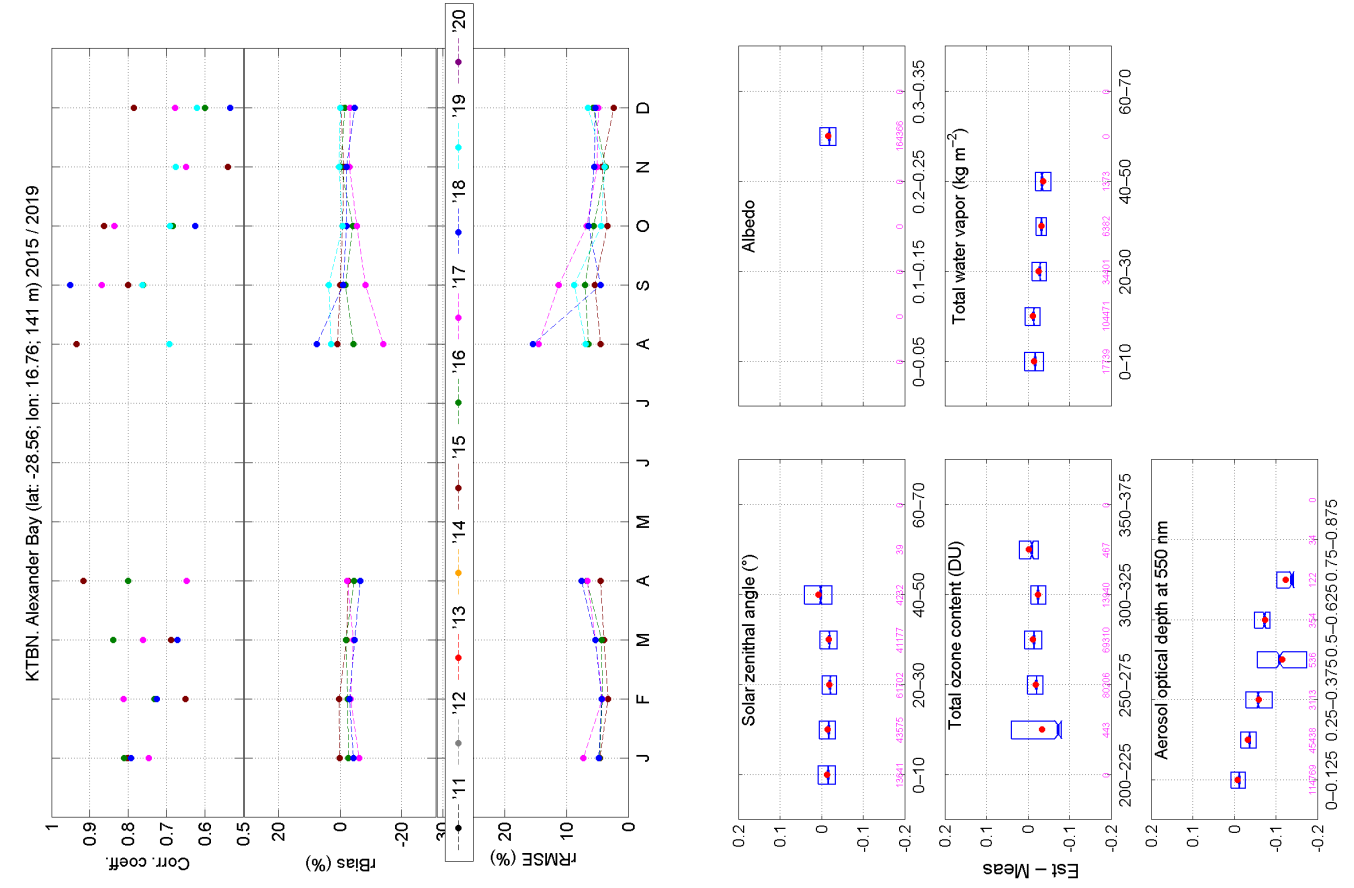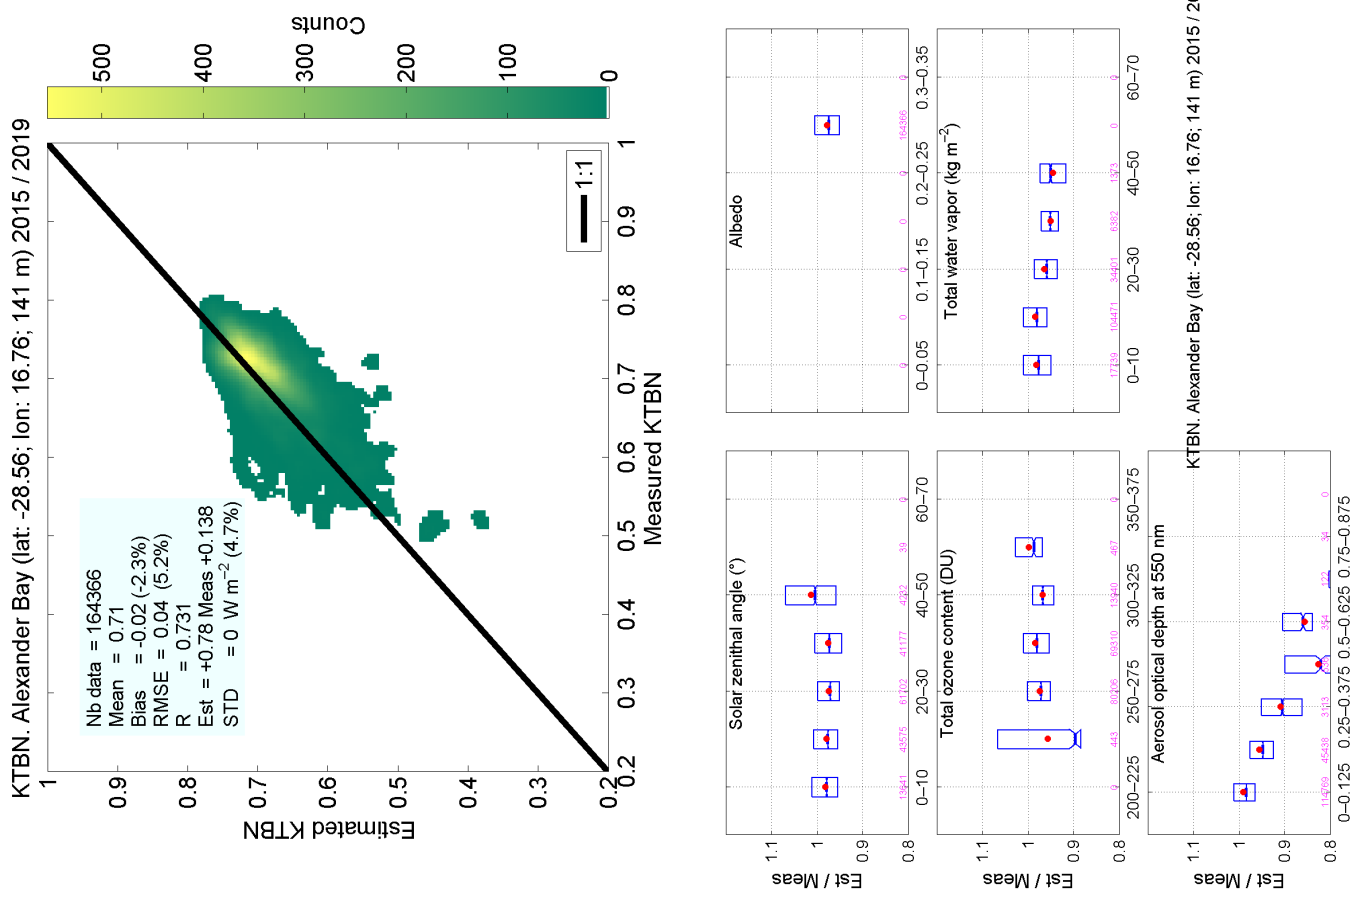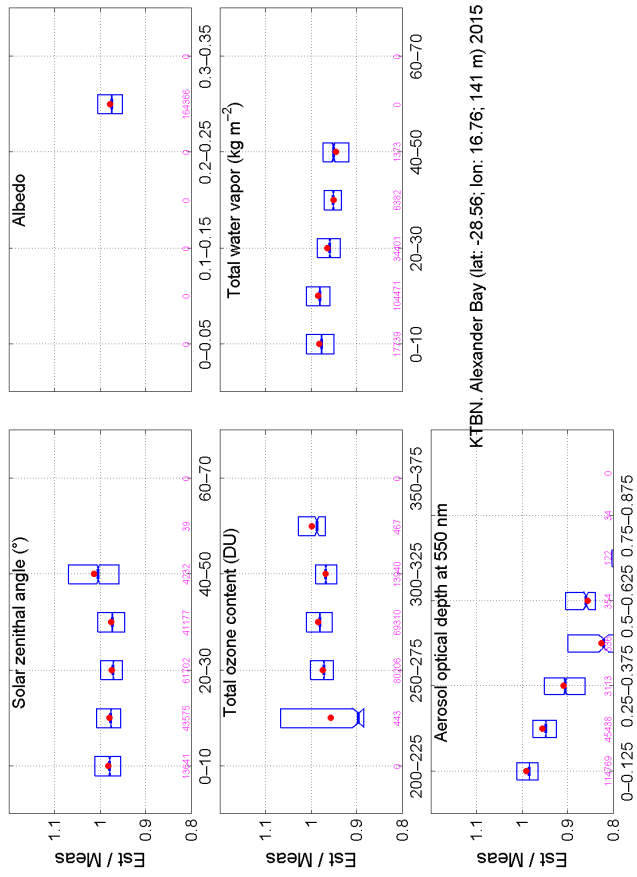

Figure S132: Comparison on direct clearness index at Alexander Bay

G. Kwadlangezwa (lat: -28.85; lon: 31.85; 90 m) 2016-02 / 2020-12

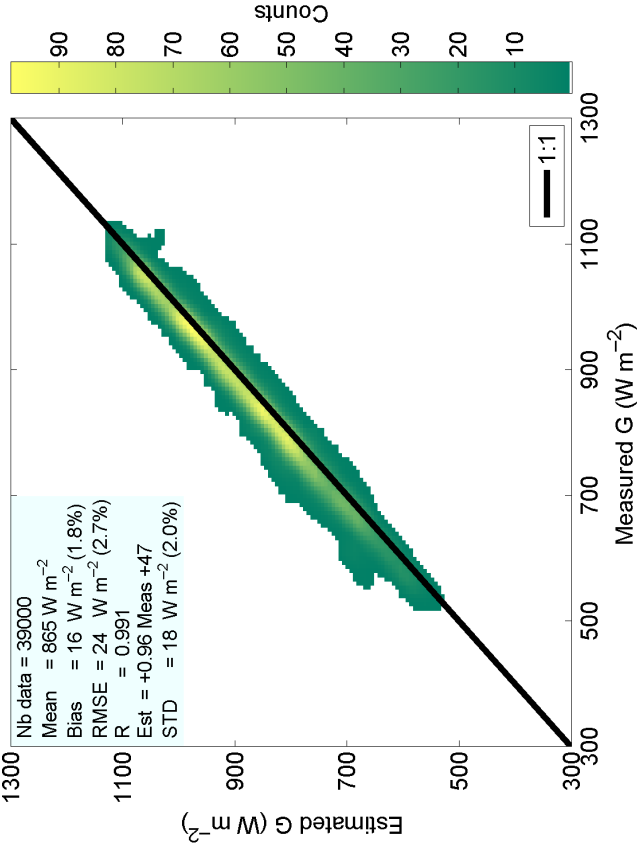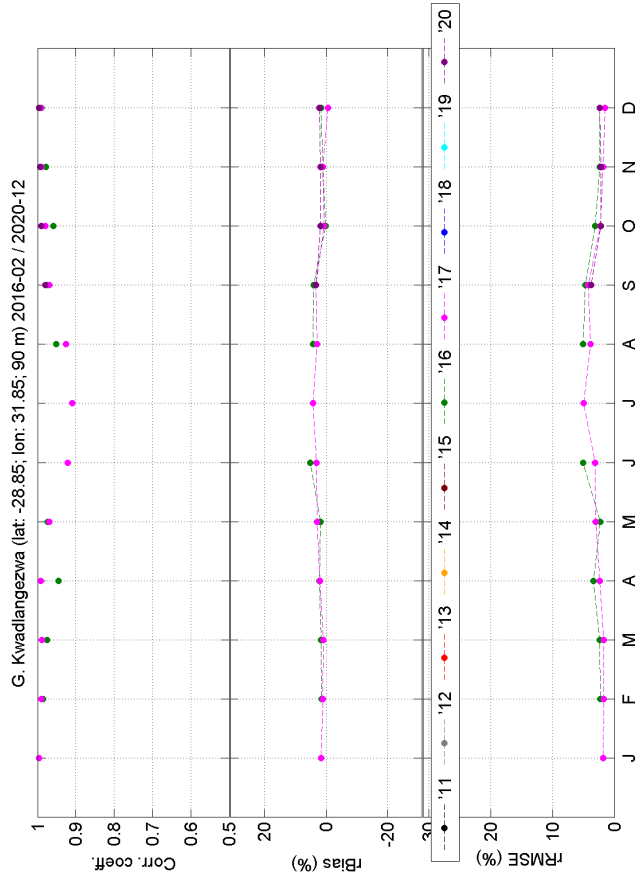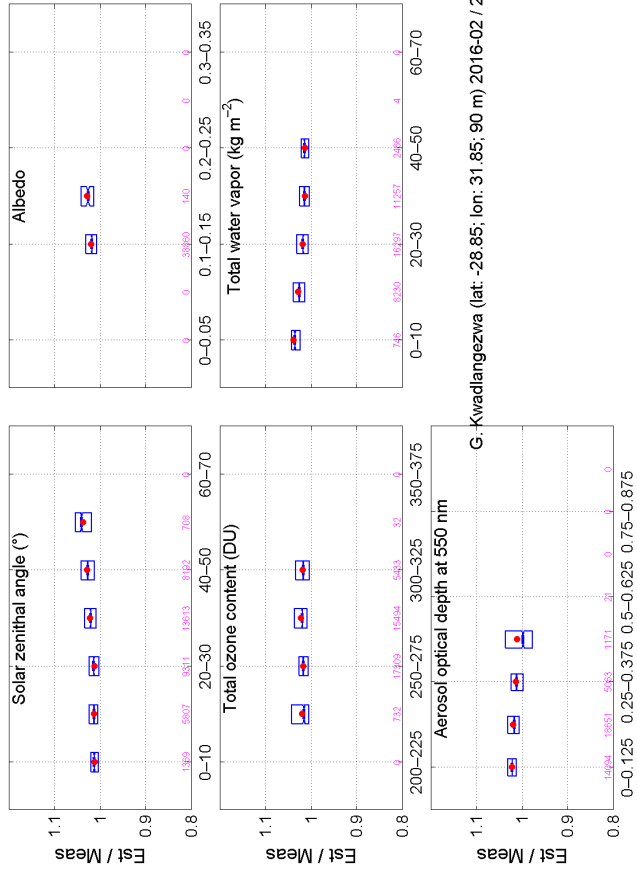

G. Kwadlangezwa (lat: -28.85; lon: 31.85; 90 m) 2016-02 / 2020-1:

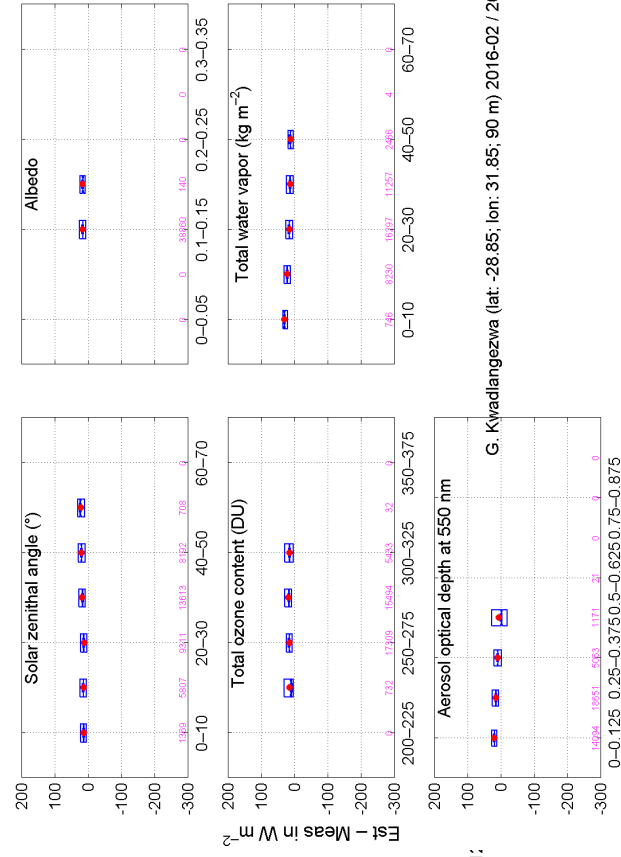

G. Kwadlangezwa (lat: -28.85; lon: 31.85; 90 m) 2016-02 / 2020-12

Figure S133: Comparison on global irradiance at Kwadlangezwa

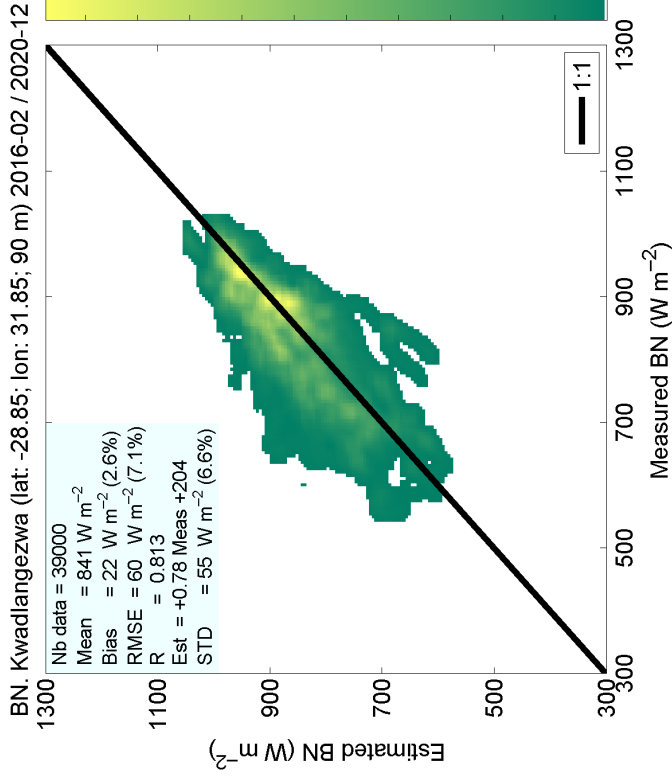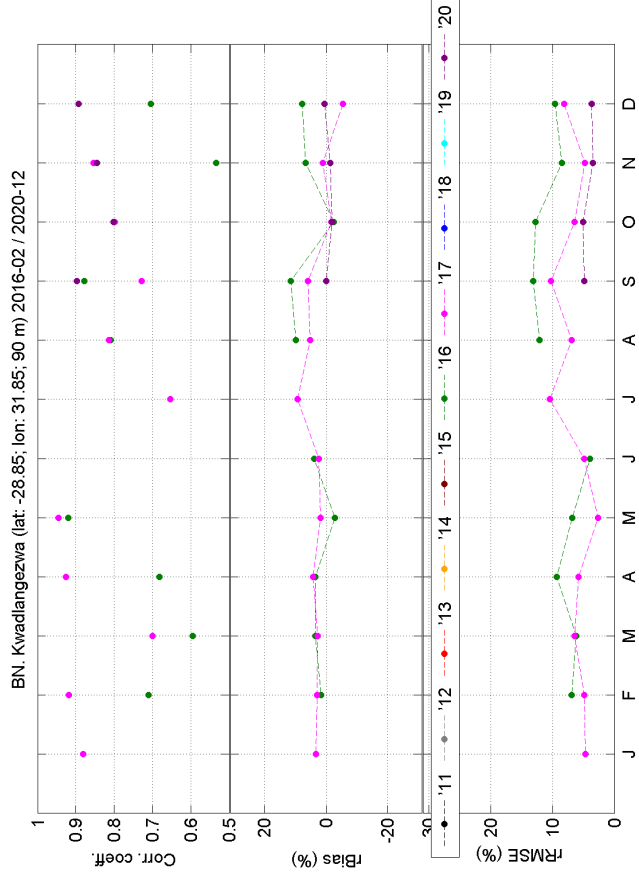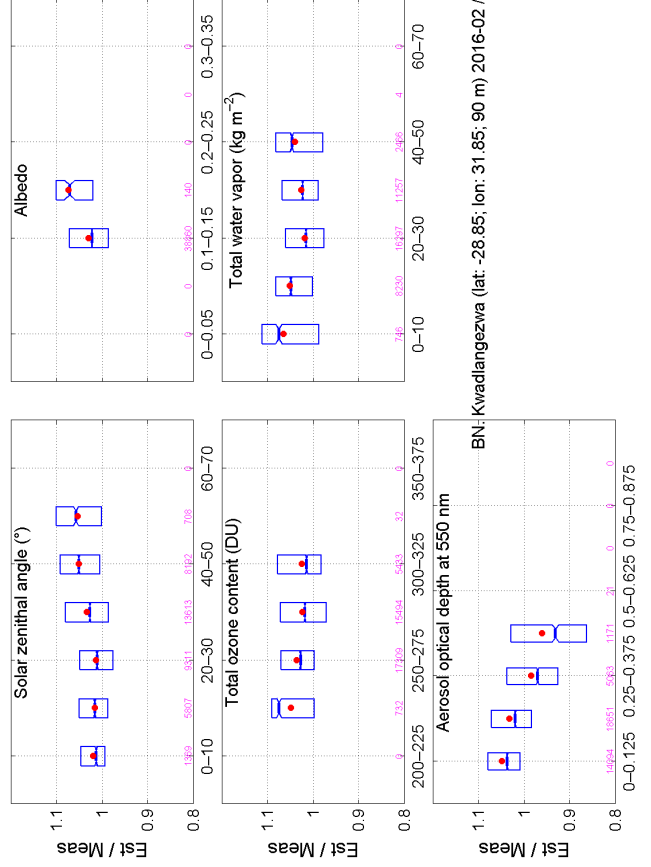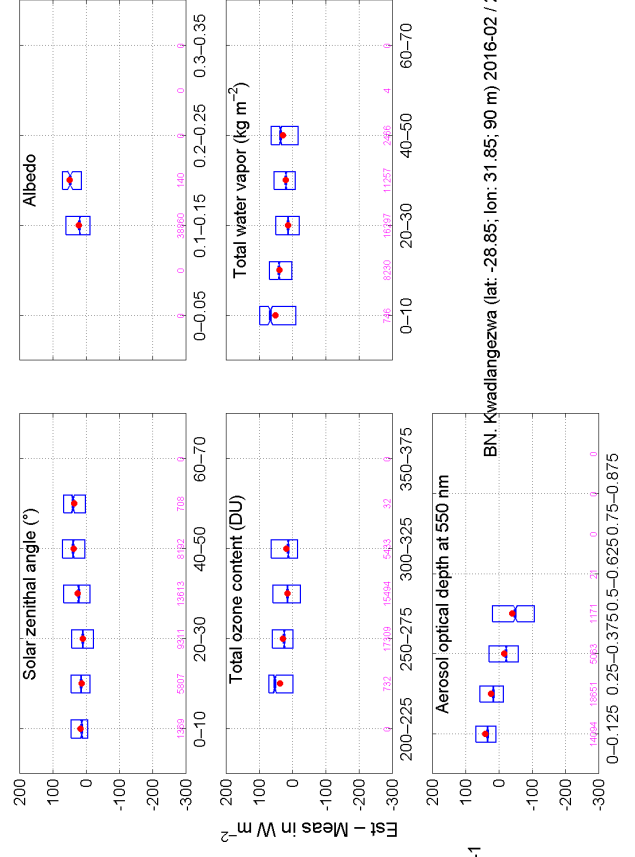

Figure S134: Comparison on direct component at normal irradiance at Kwadlangezwa



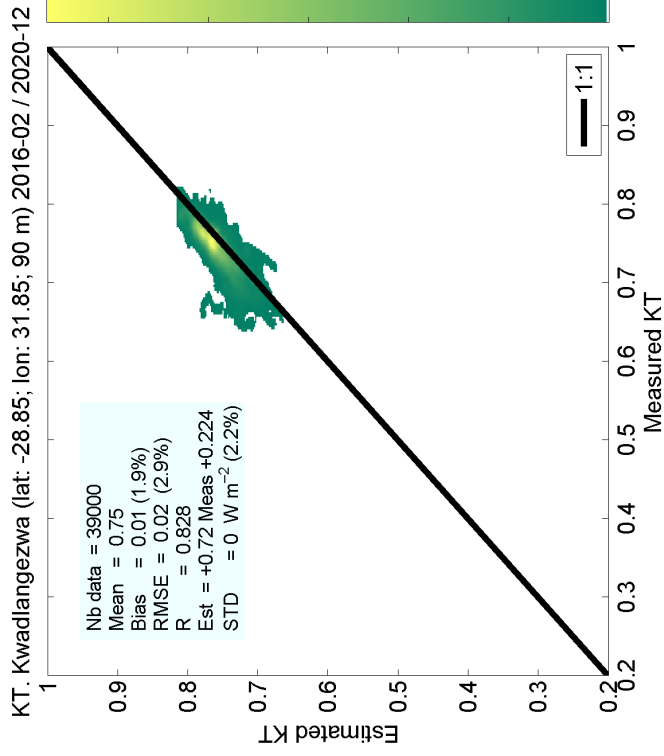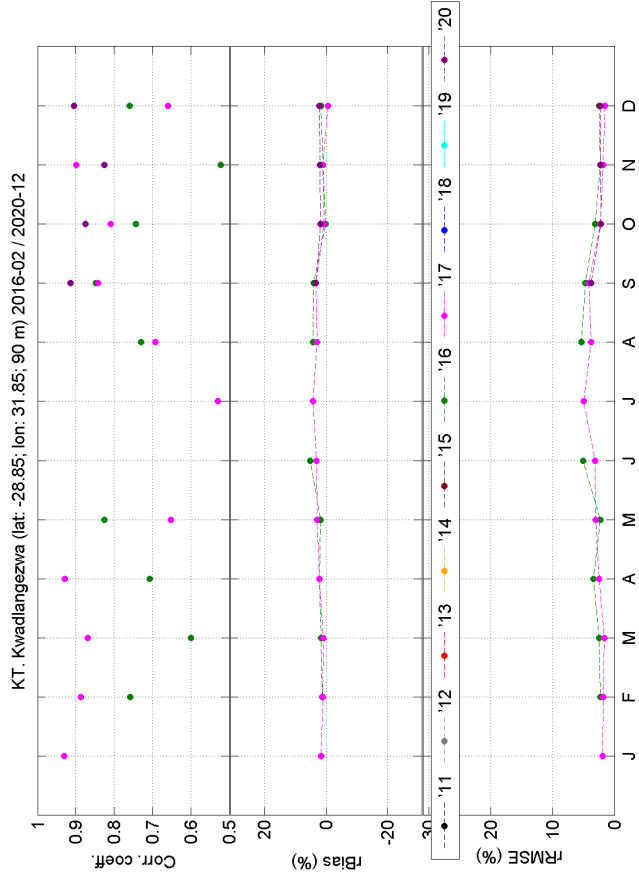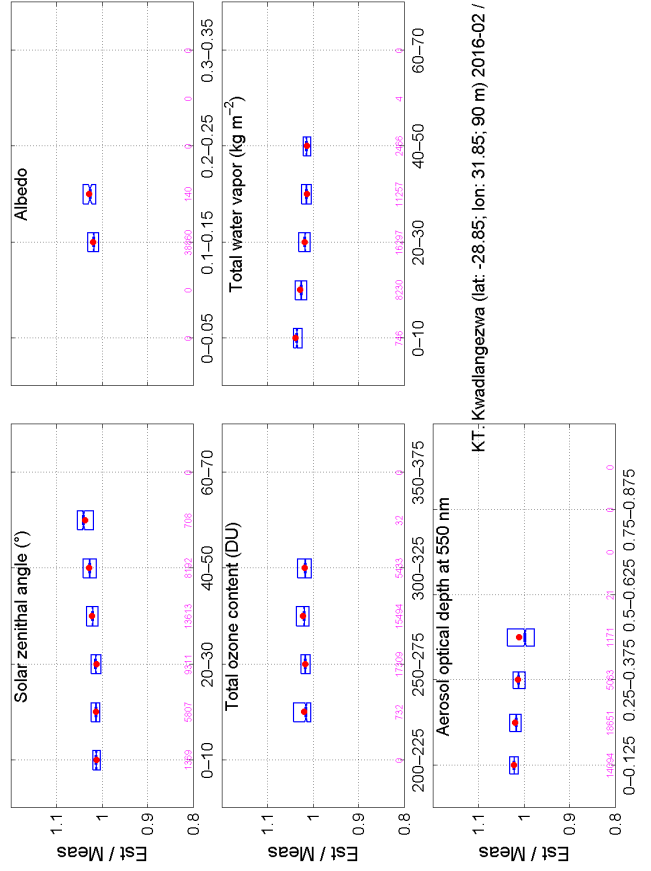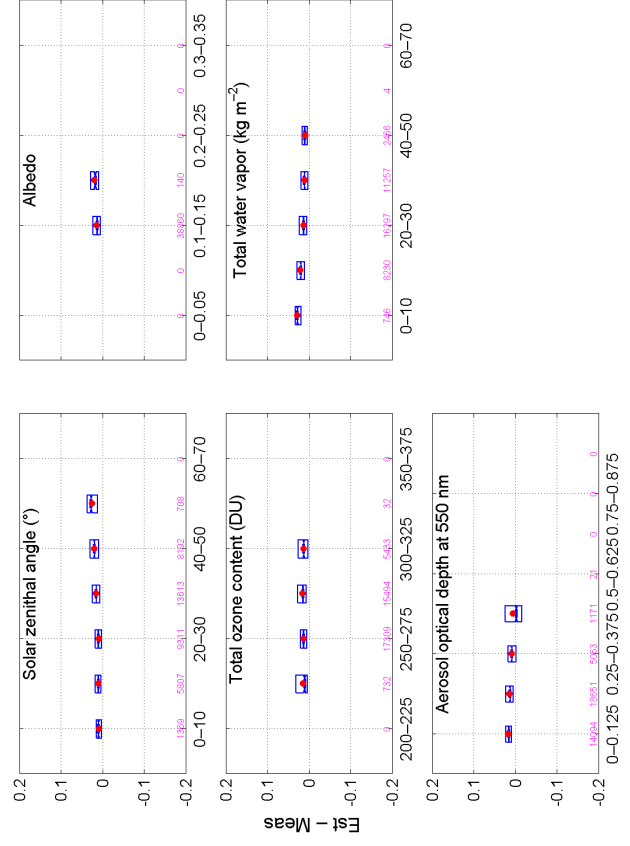

Figure S135: Comparison on clearness index at Kwadlangezwa

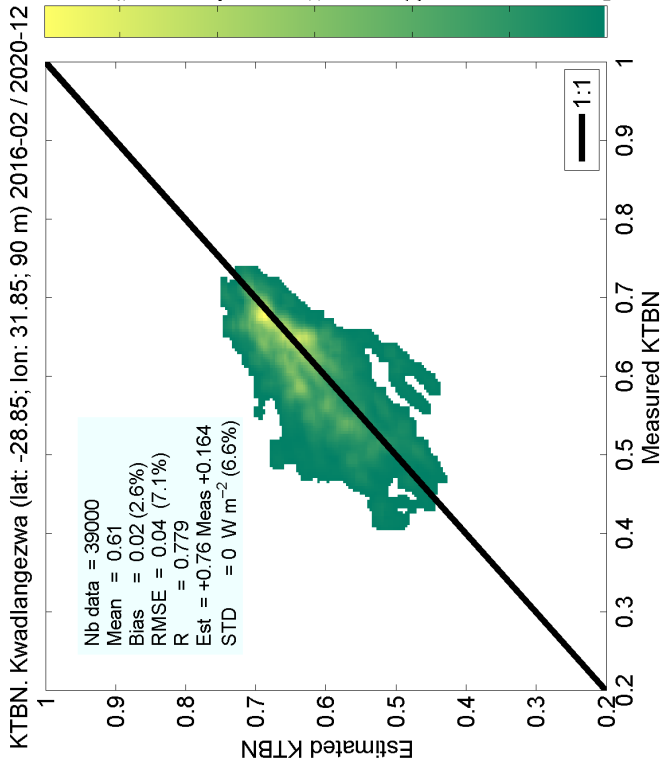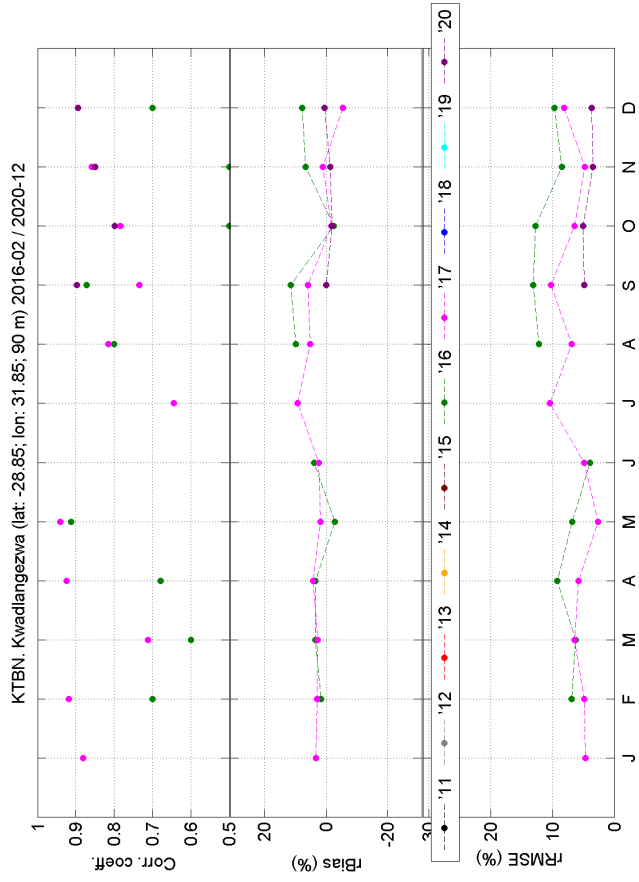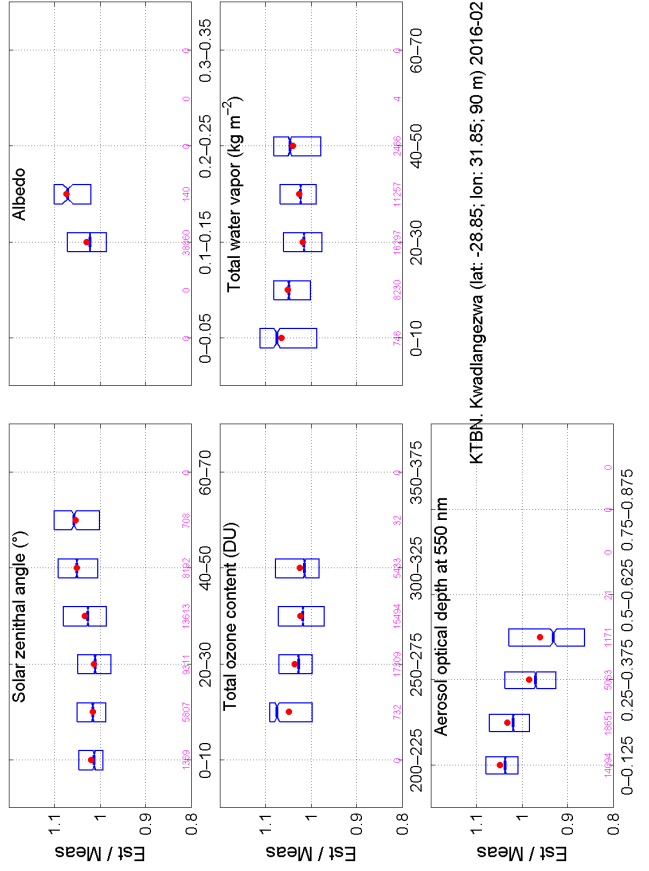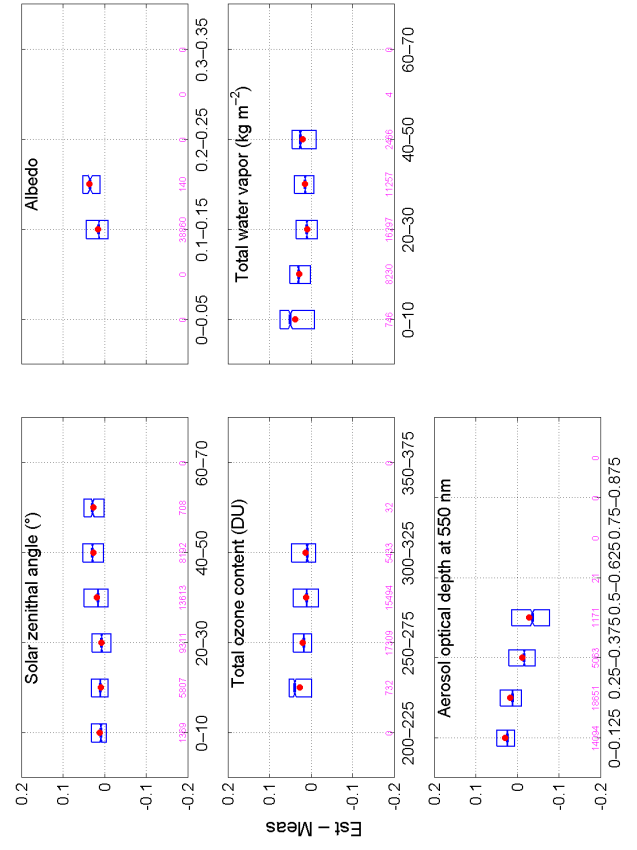

Figure S136: Comparison on direct clearness index at Kwadlangezwa

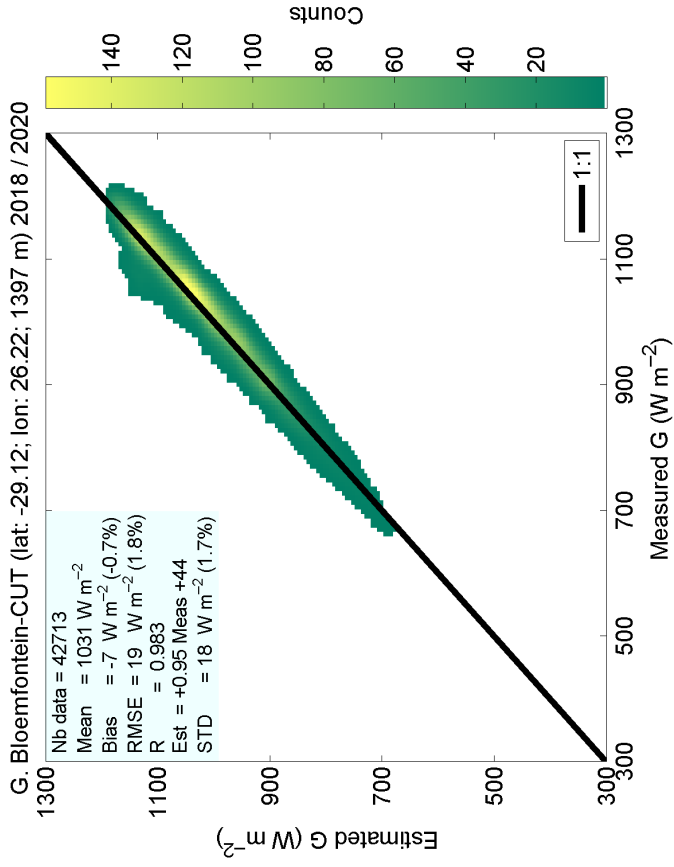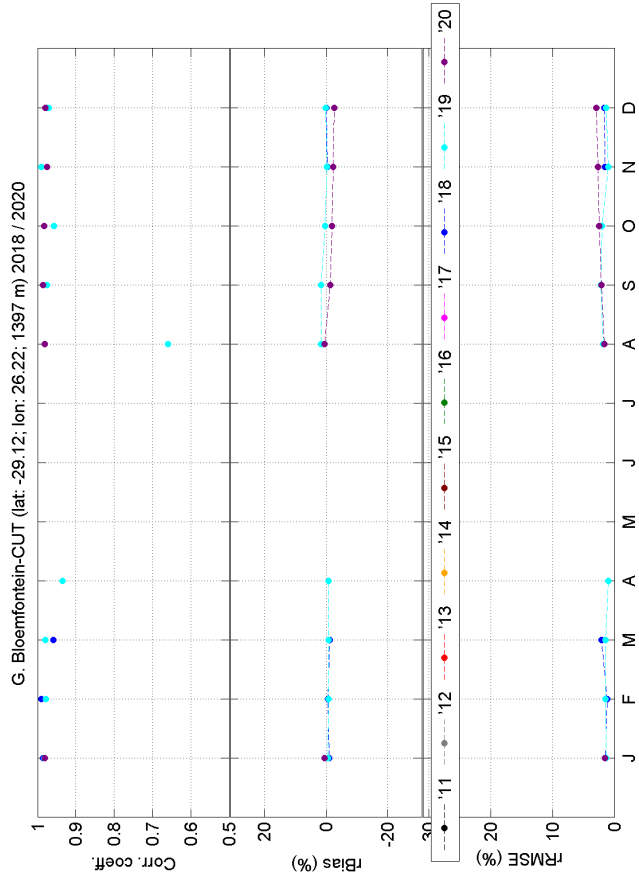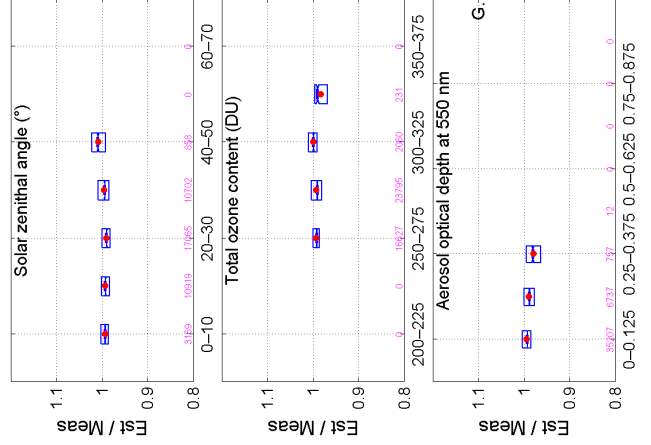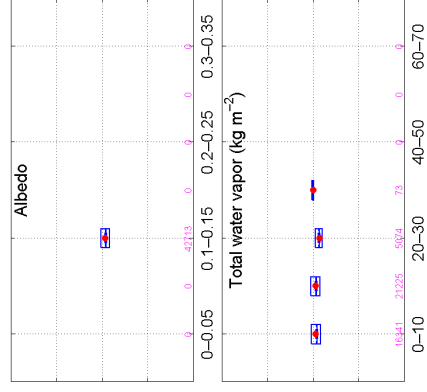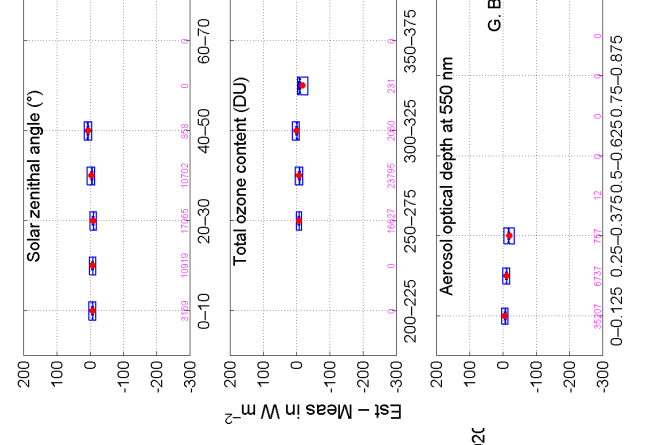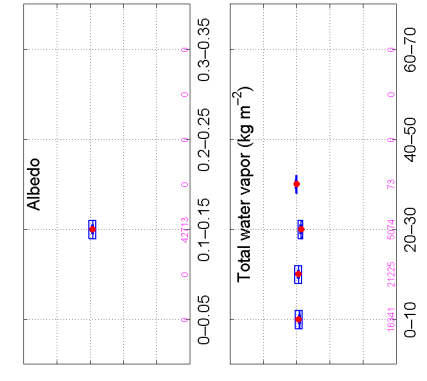

Figure S137: Comparison on global irradiance at Bloemfontein-CUT

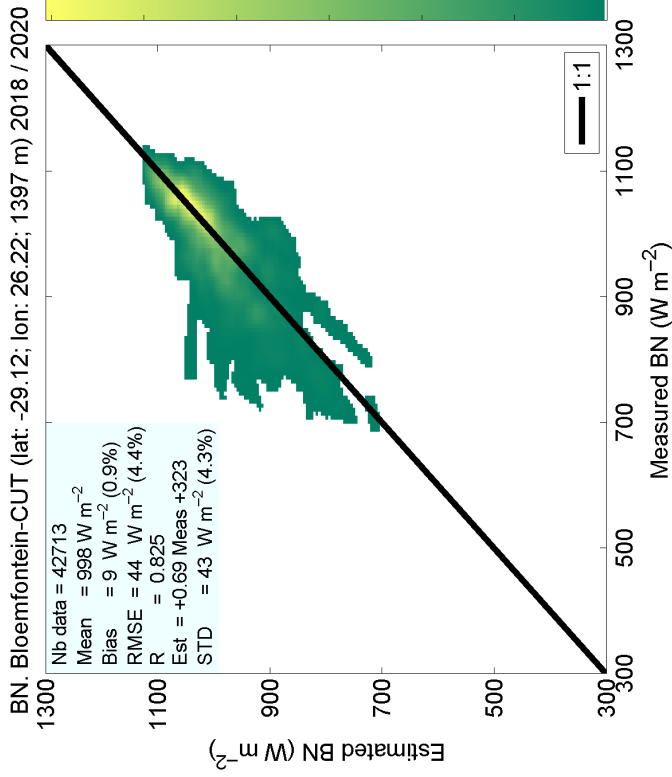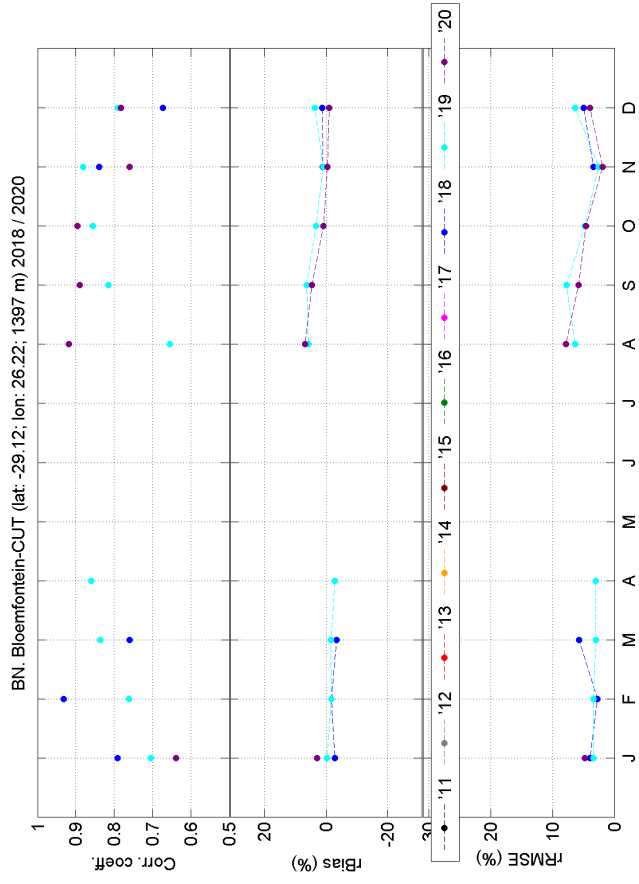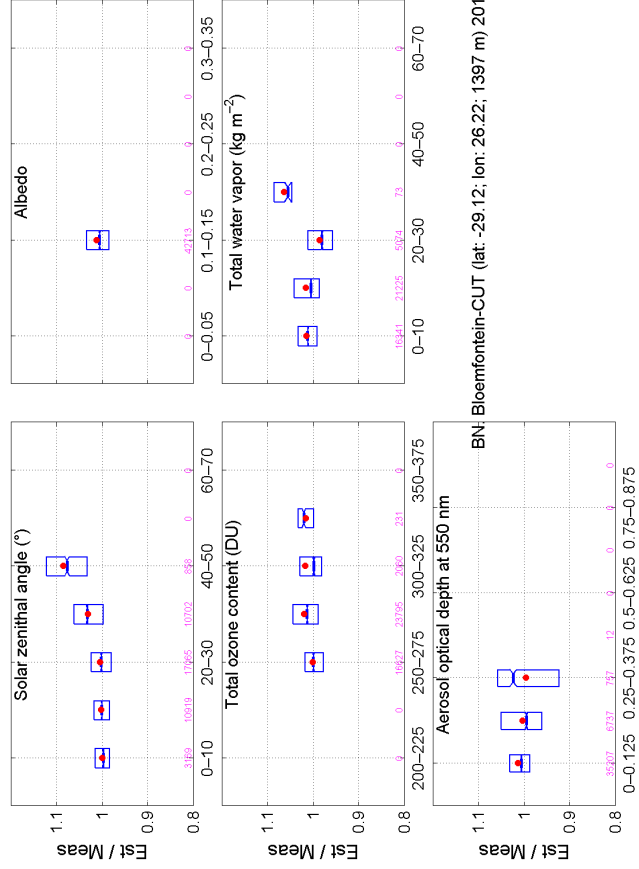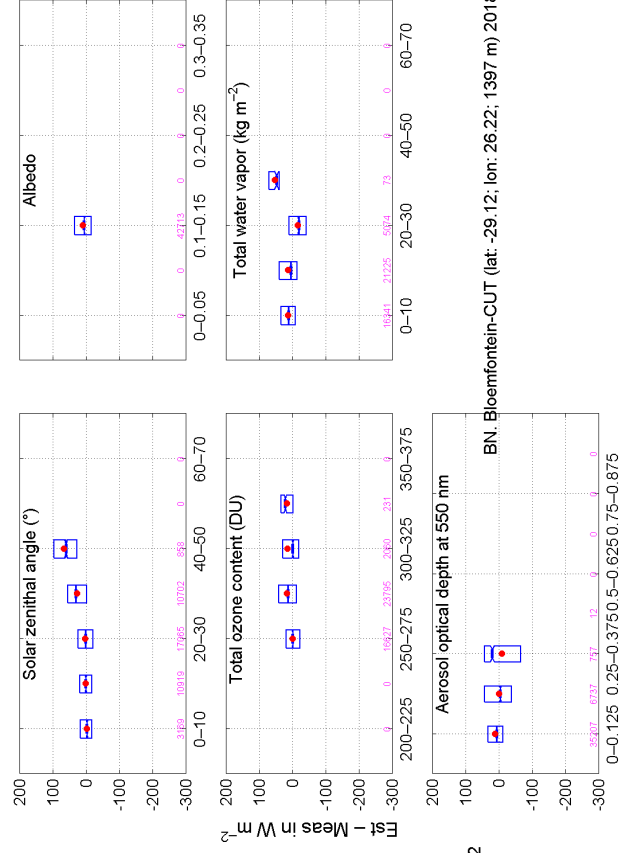

Figure S138: Comparison on direct component at Bloemfontein-CUT

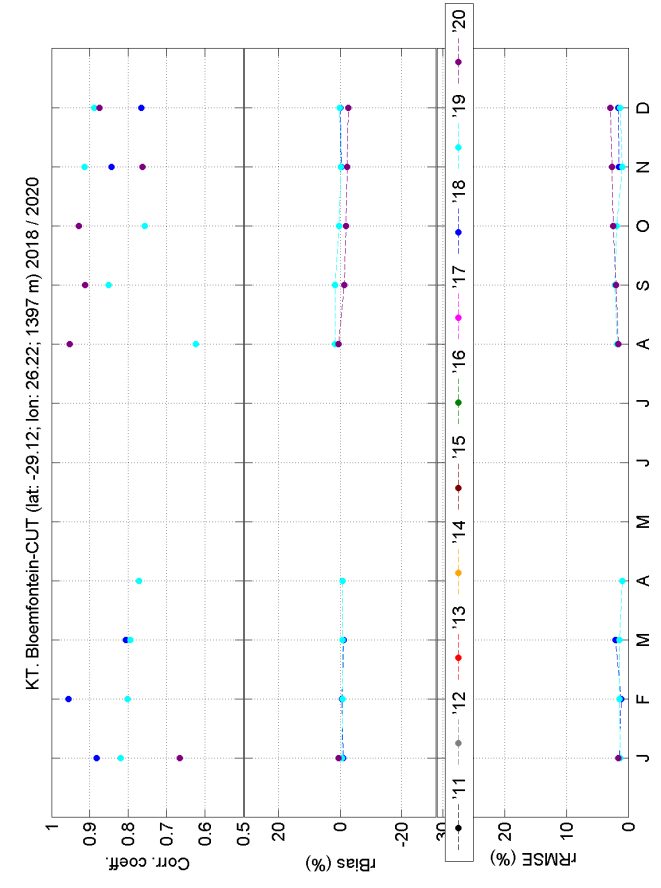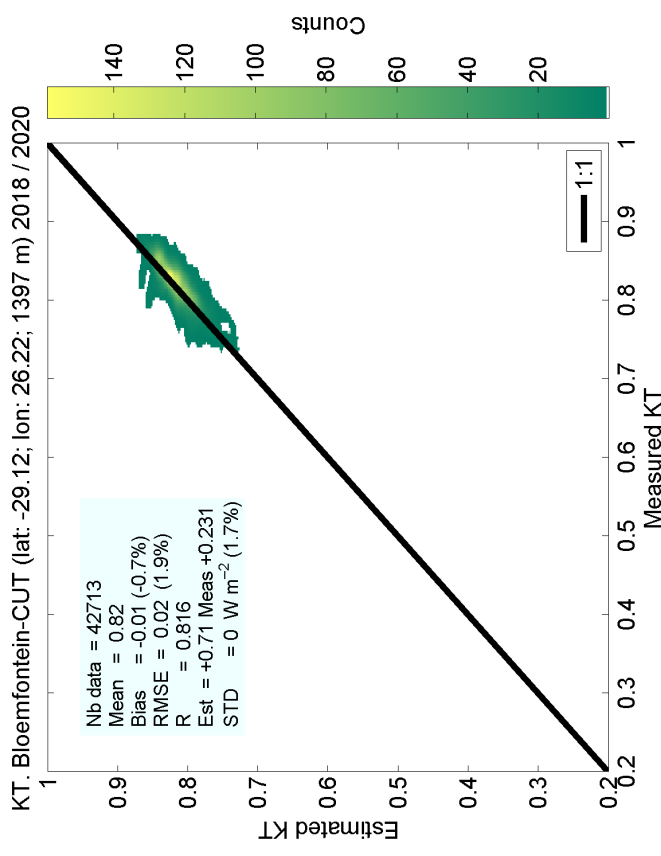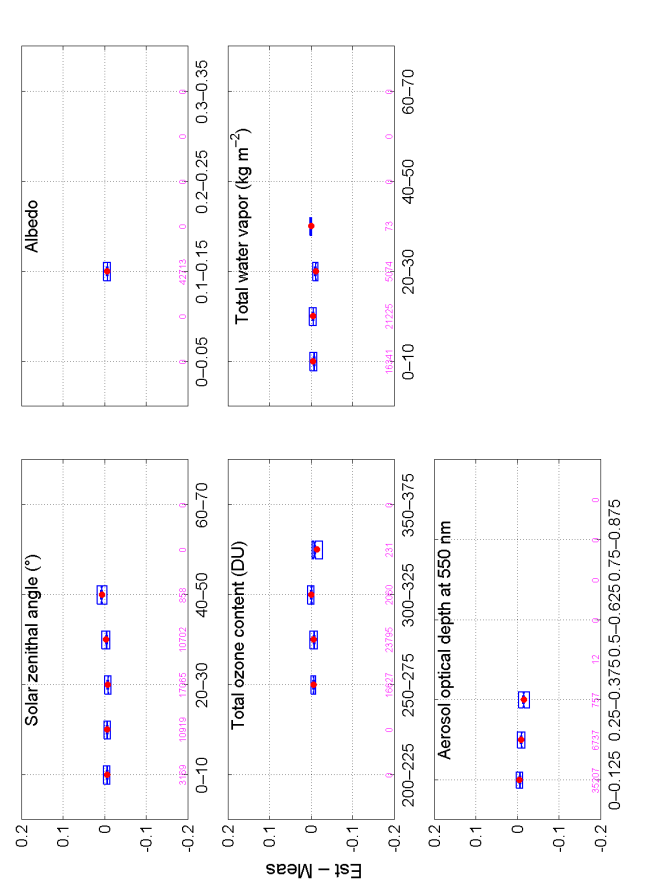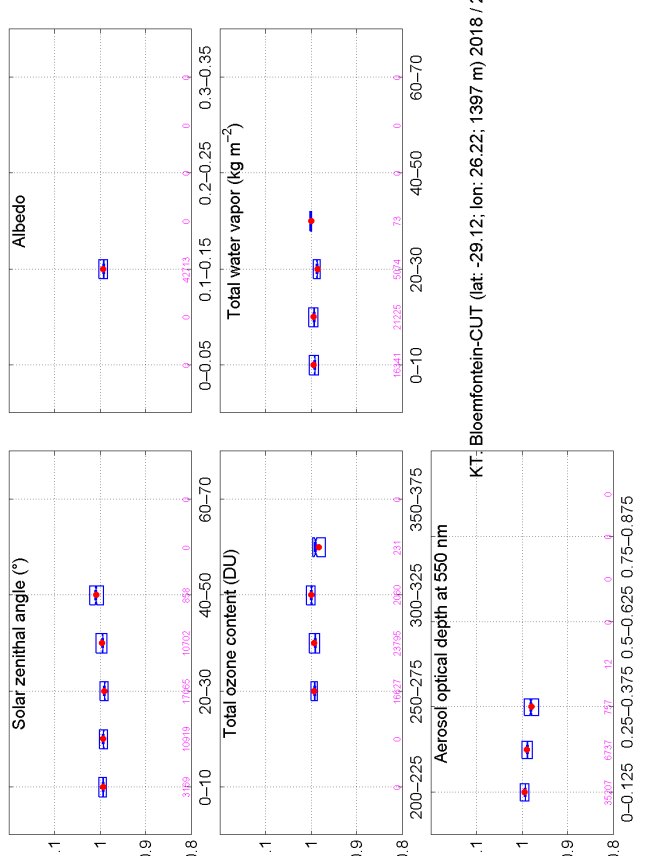

Figure S139: Comparison on clearness index at Bloemfontein-CUT

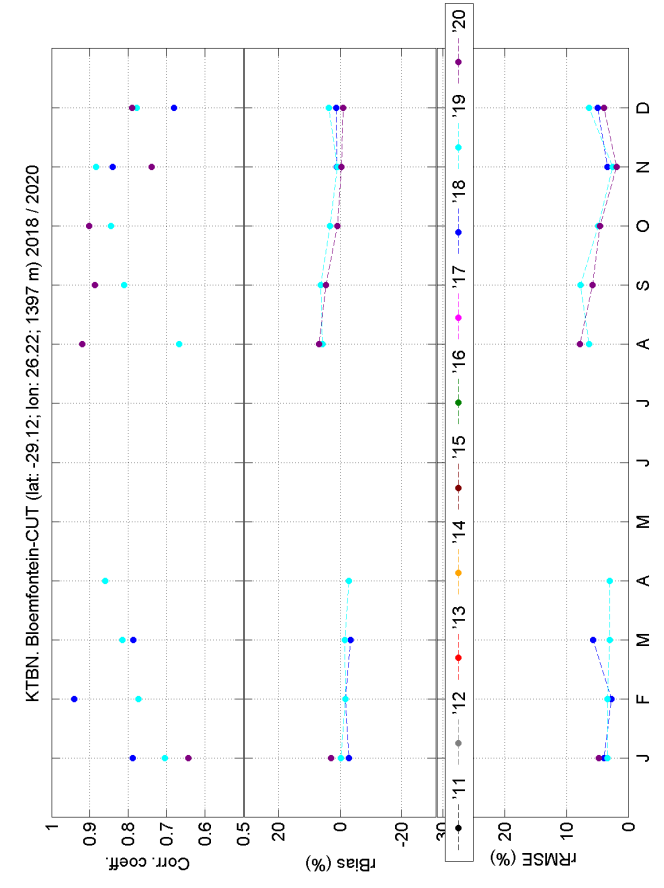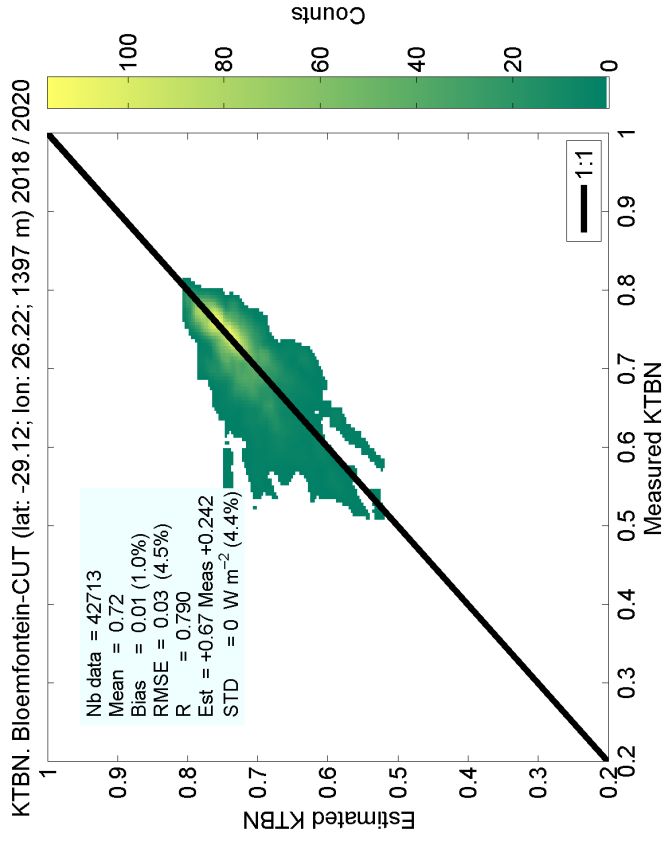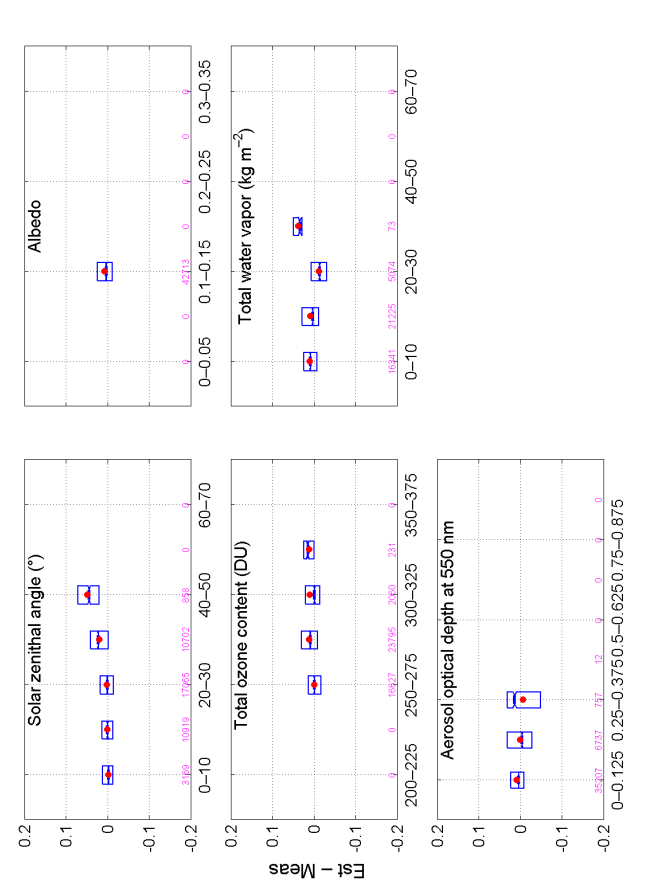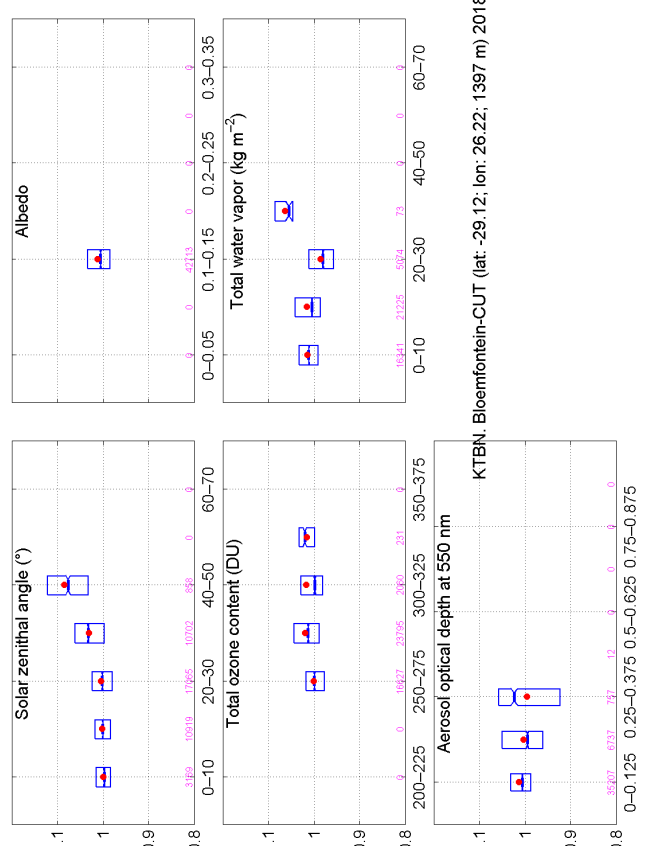

Figure S140: Comparison on direct clearness index at Bloemfontein-CUT

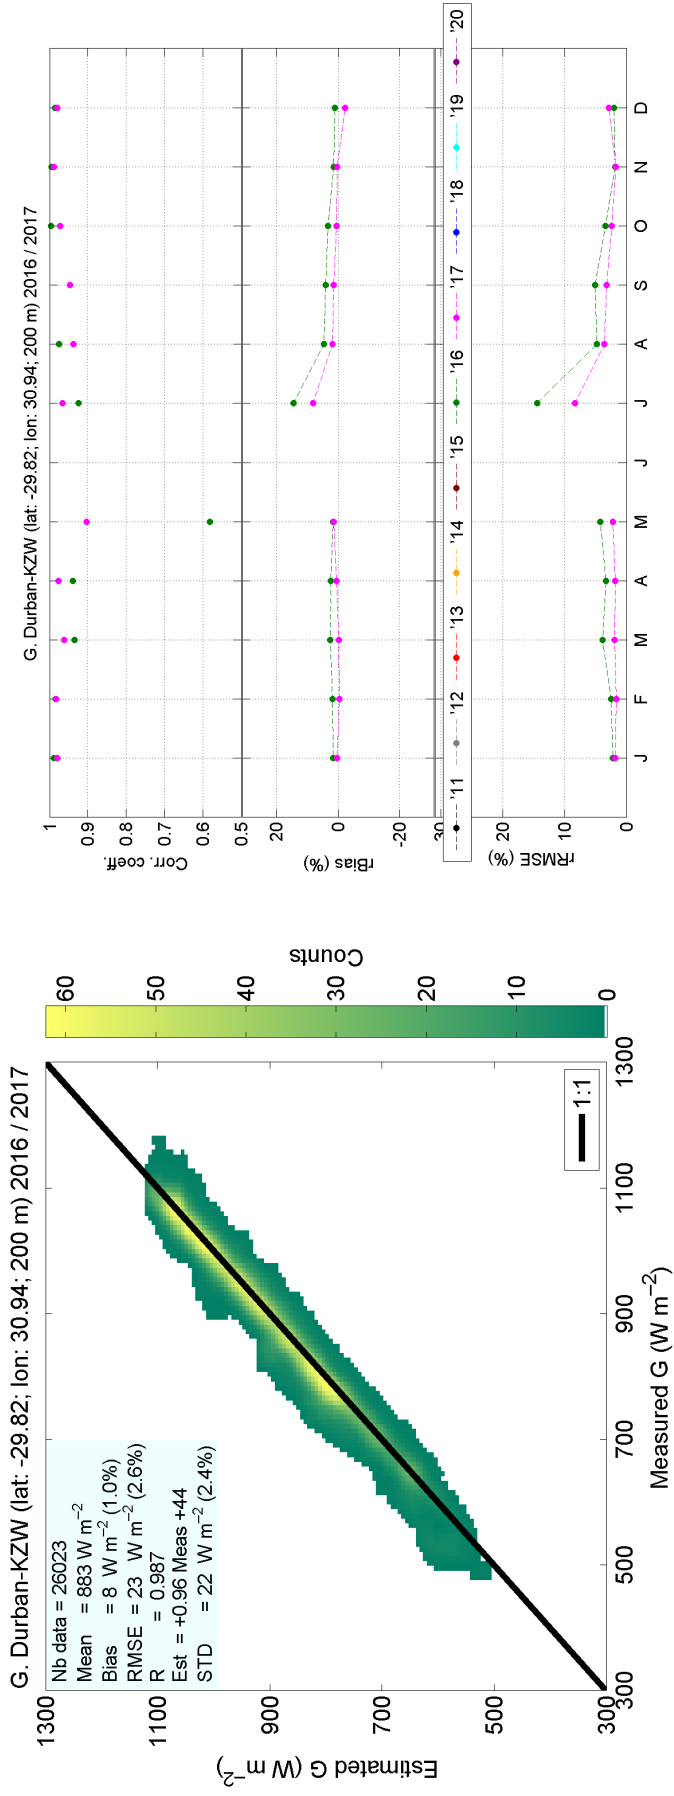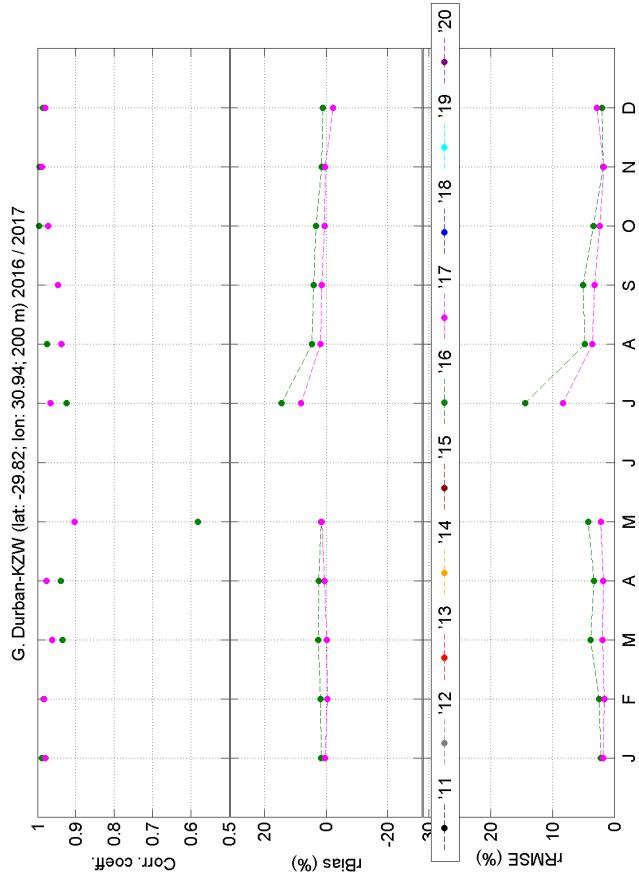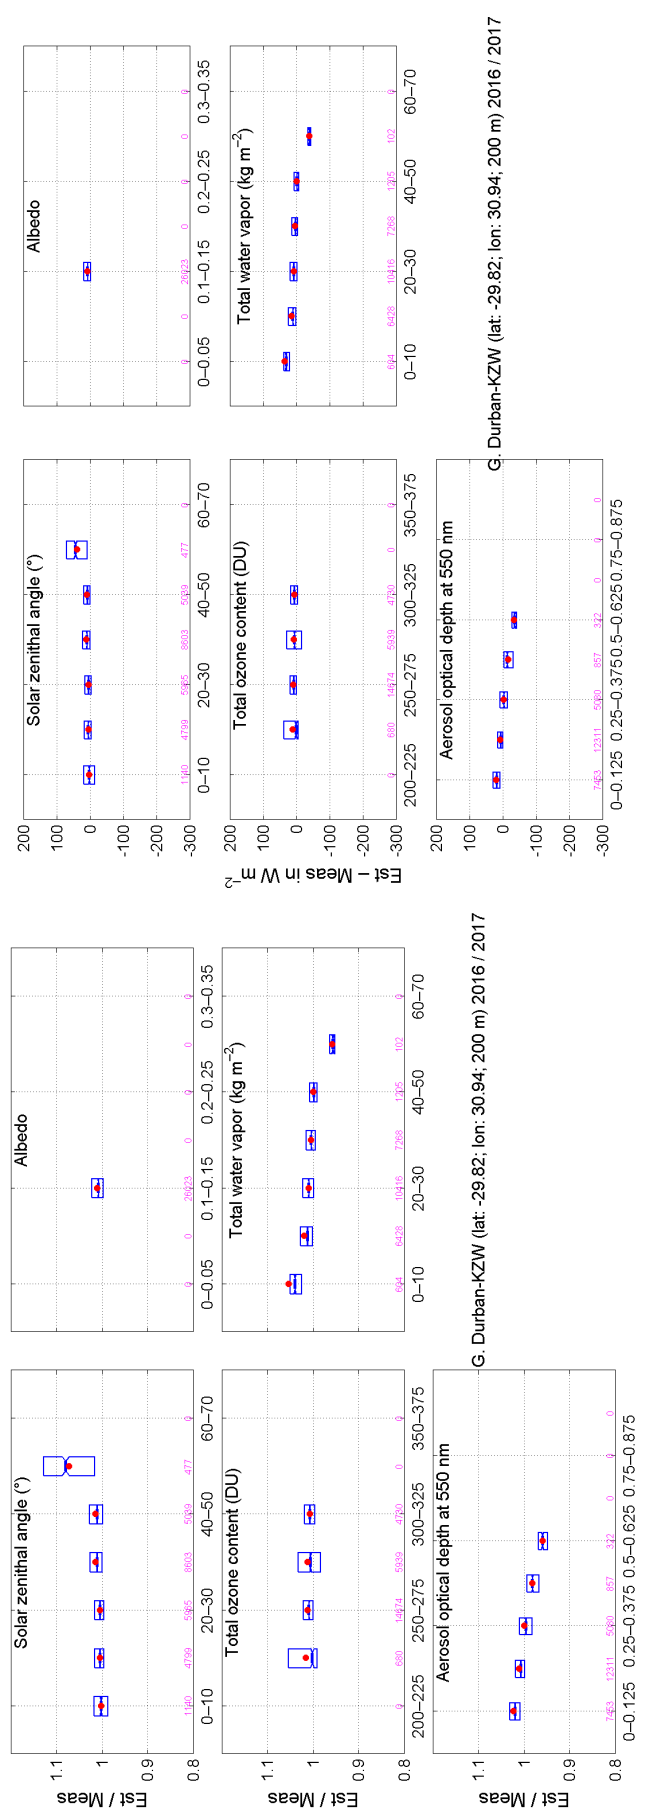

Figure S141: Comparison on global irradiance at Durban-KZW

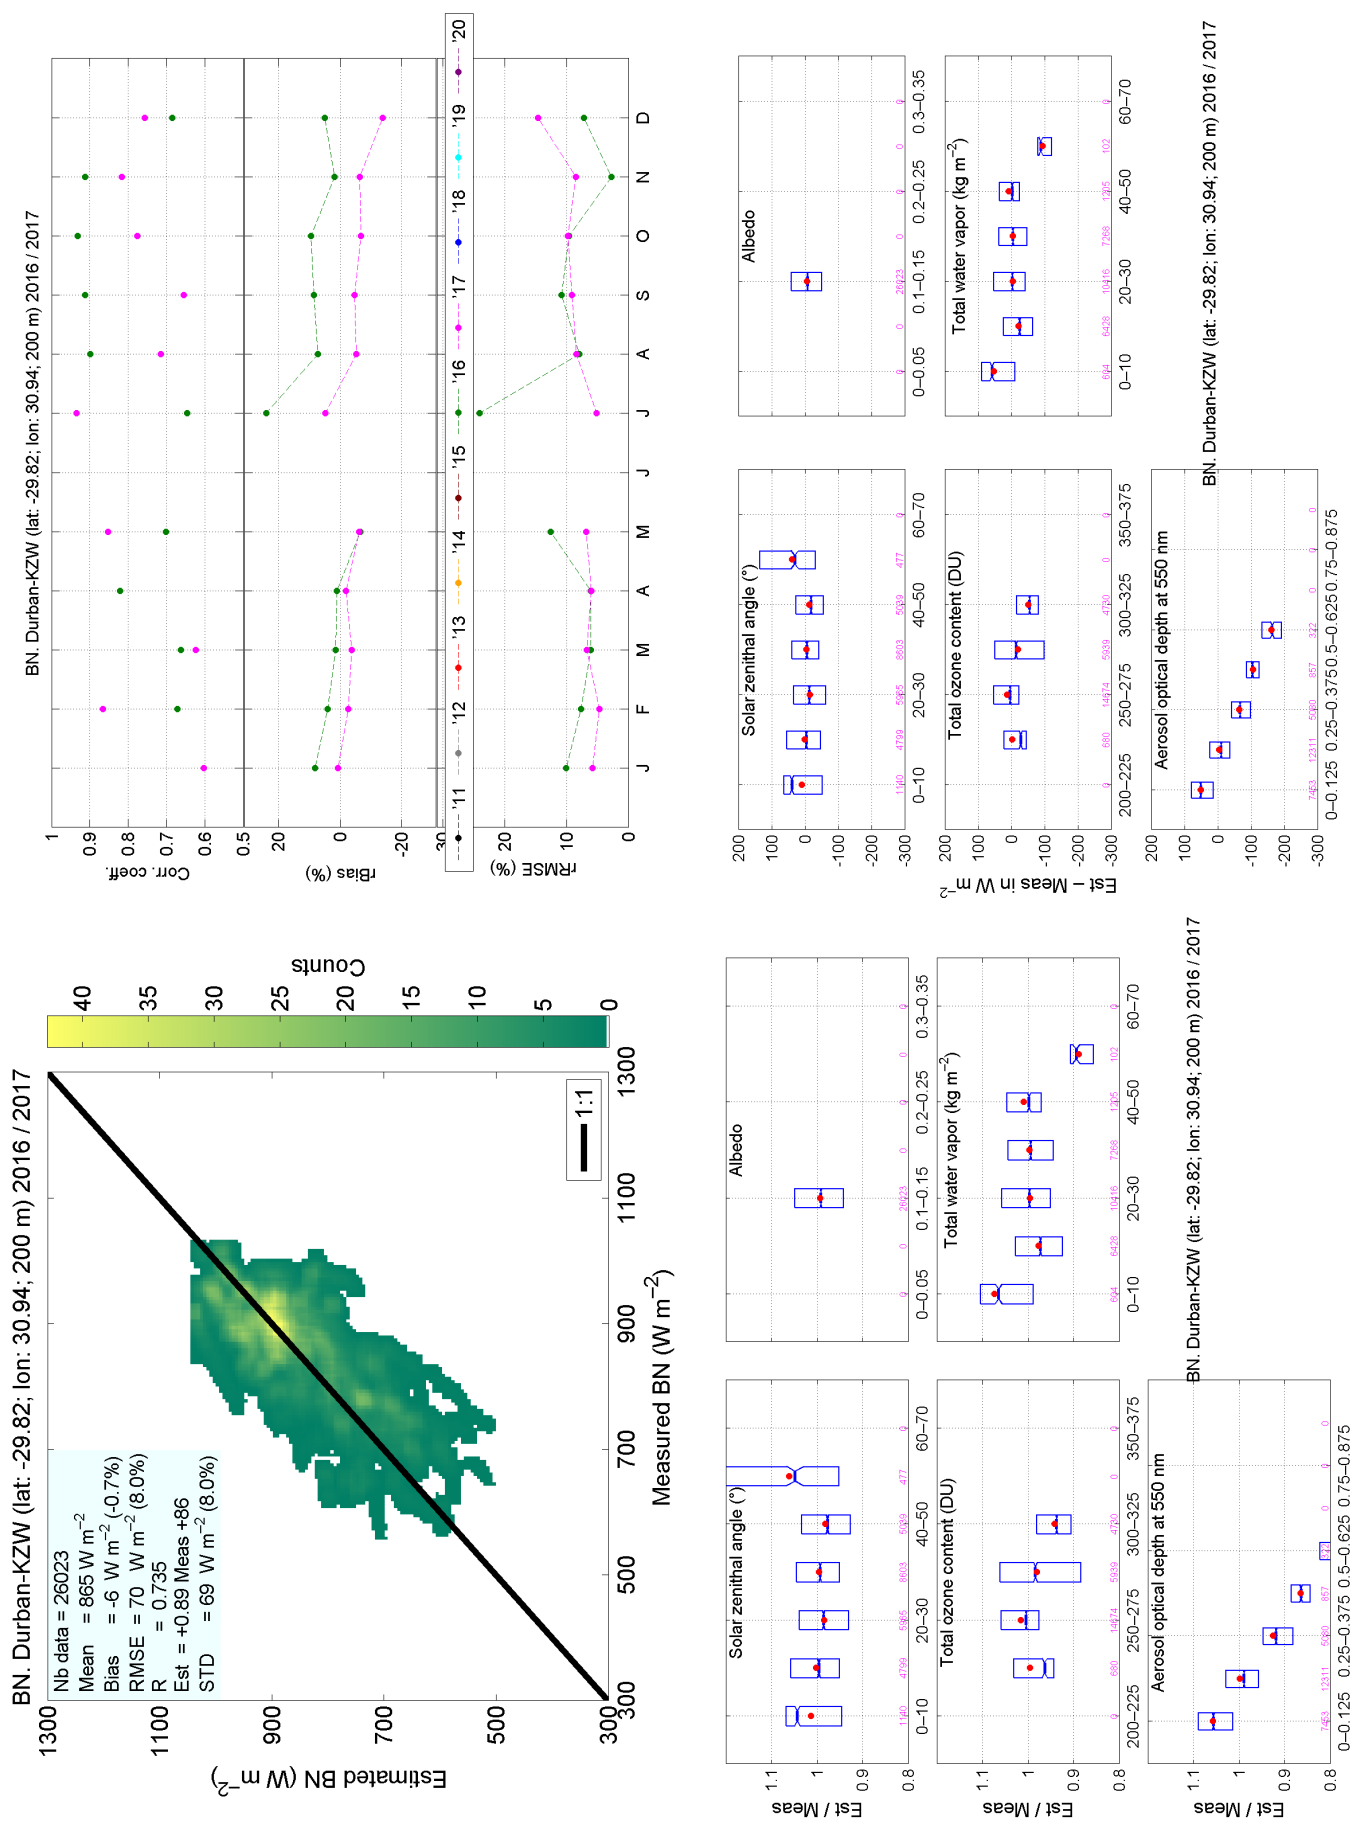

Figure S142: Comparison on direct component at normal irradiance at Durban-KZW



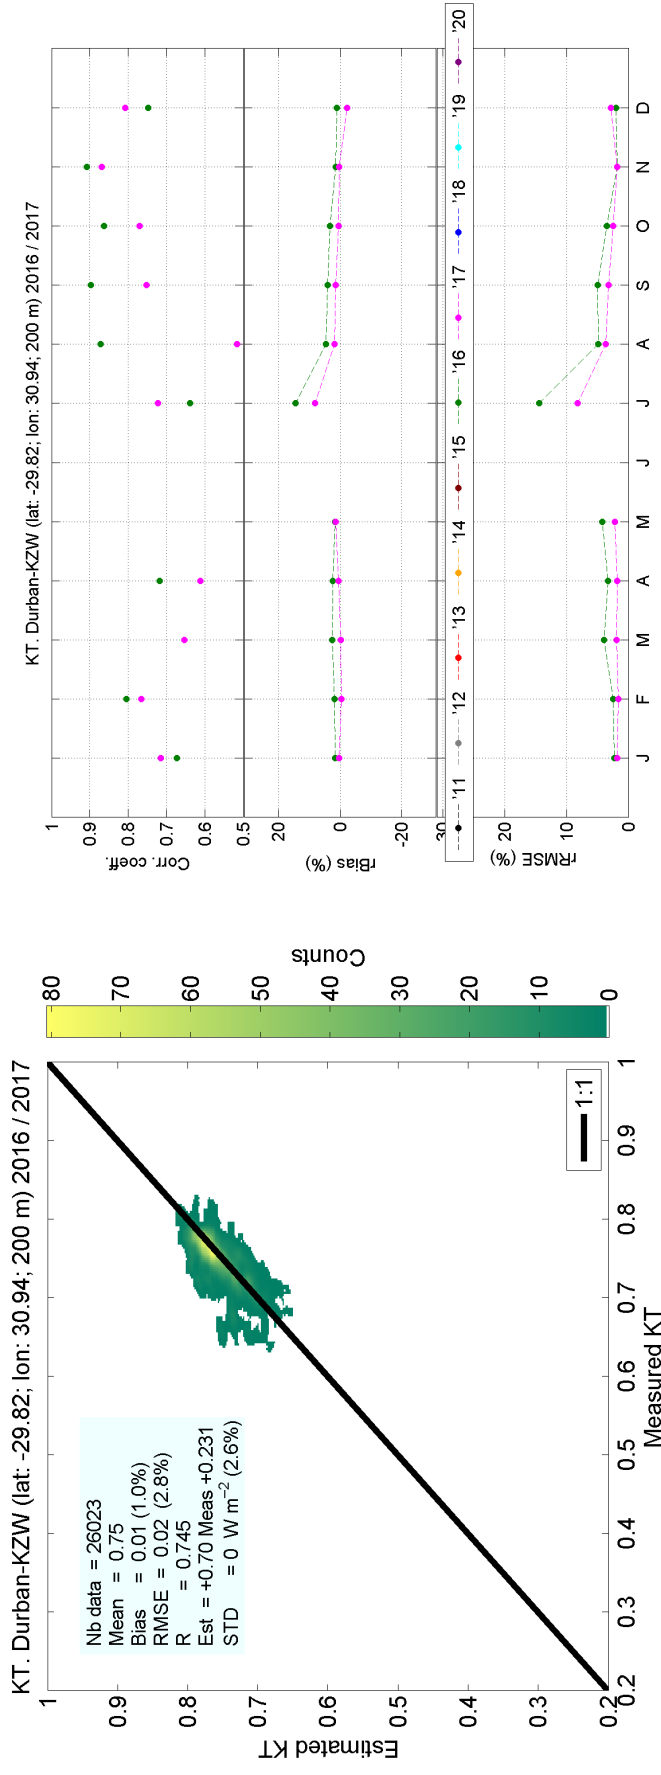

KT. Durban-KZW (lat: -29.82; lon: 30.94; 200 m) 2016 / 2017

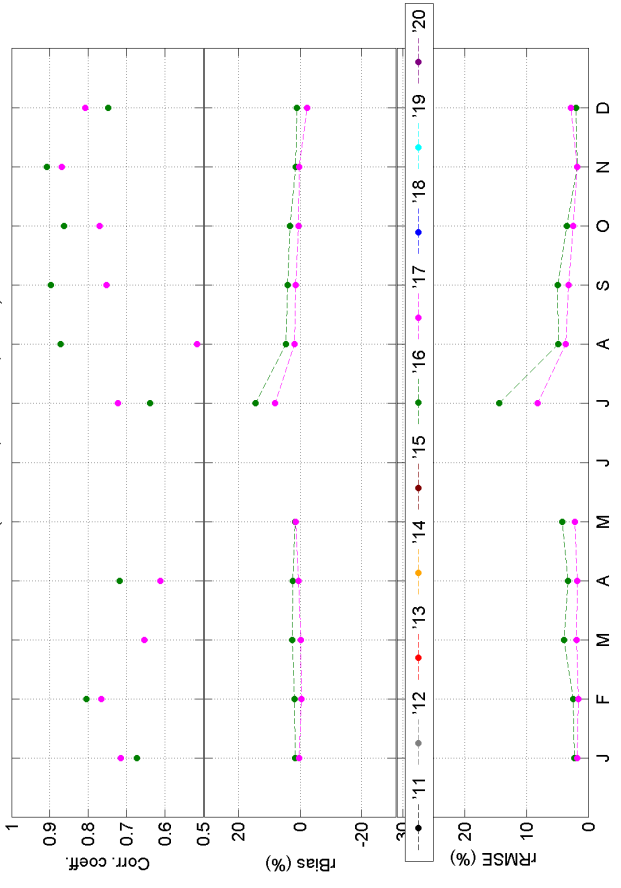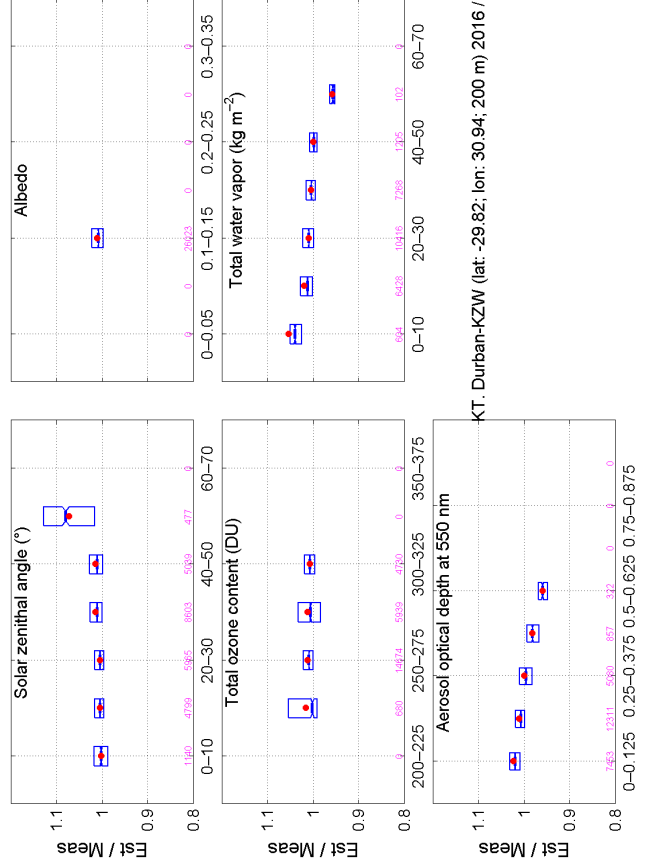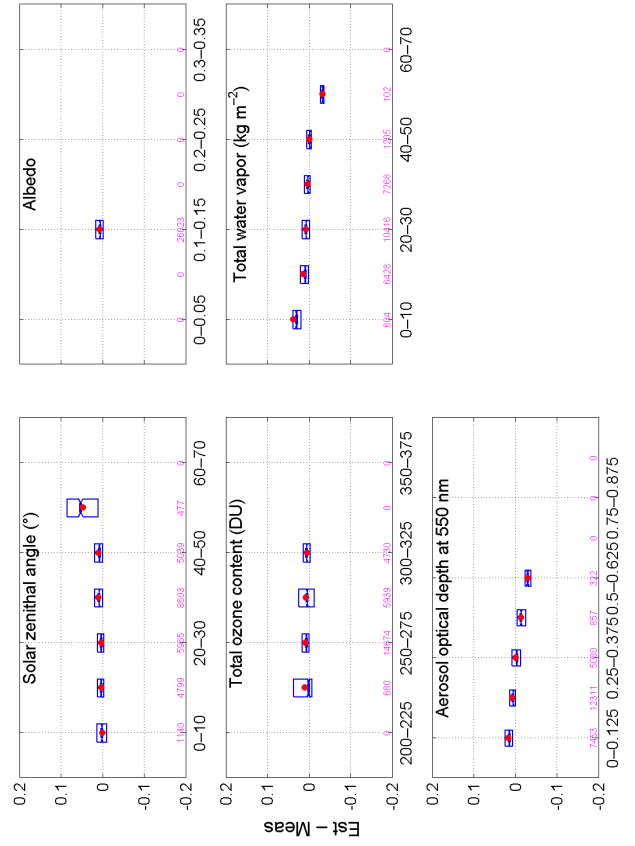

Figure S143: Comparison on clearness index at Durban-KZW

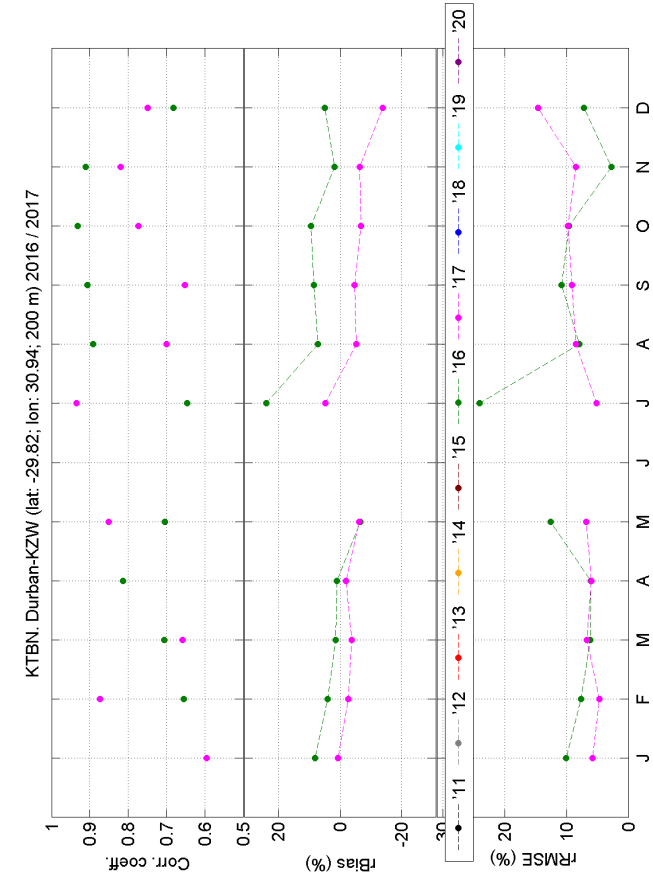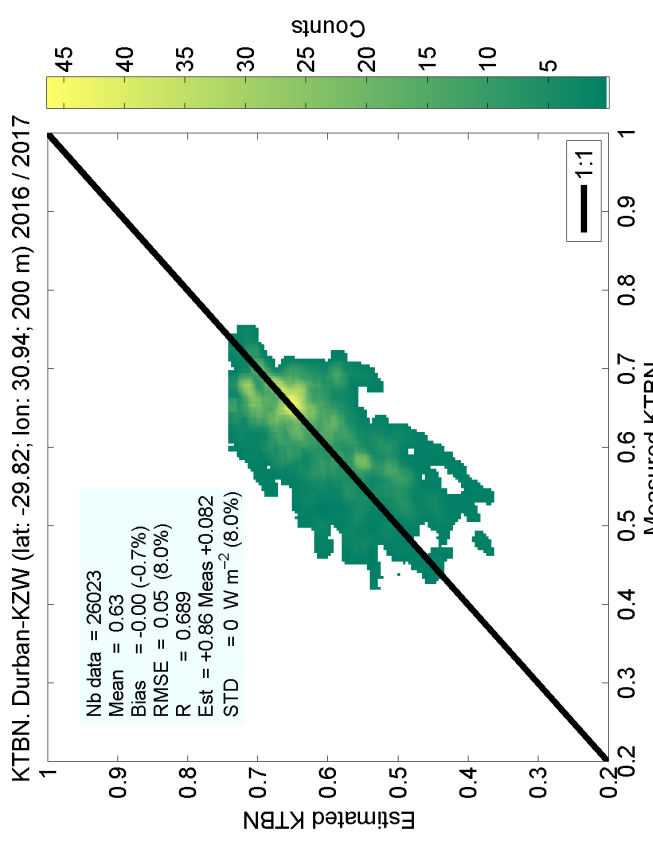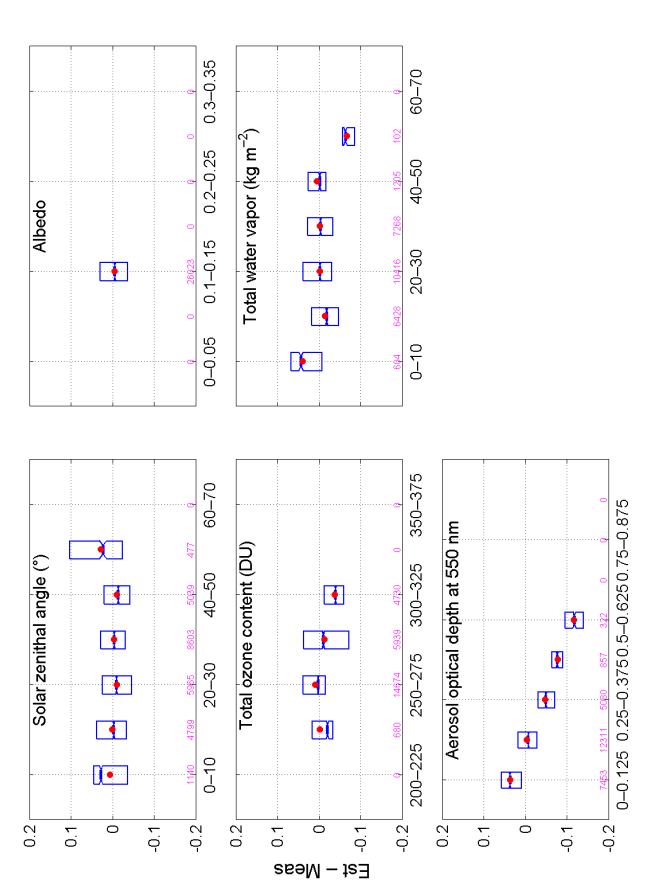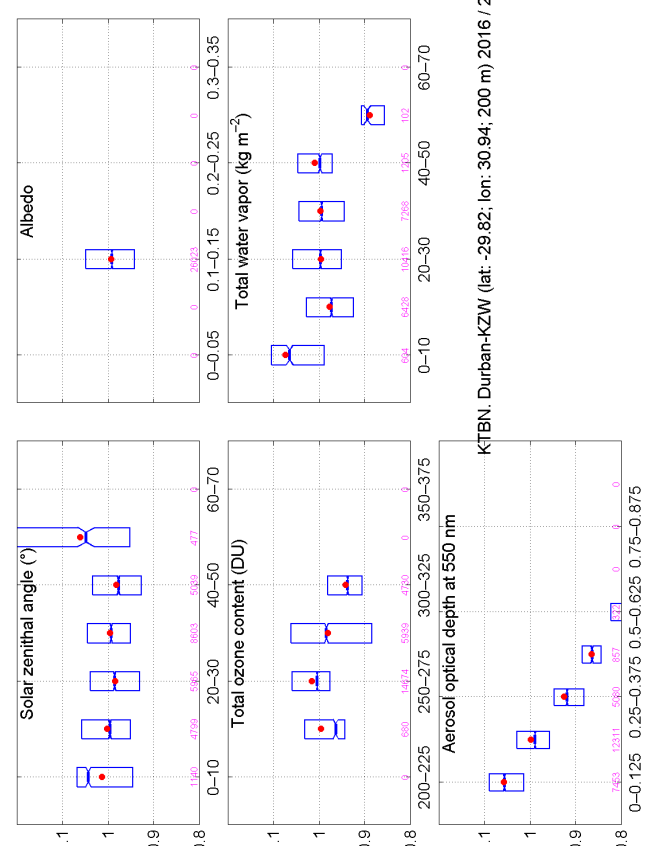

Figure S144: Comparison on direct clearness index at Durban-KZW

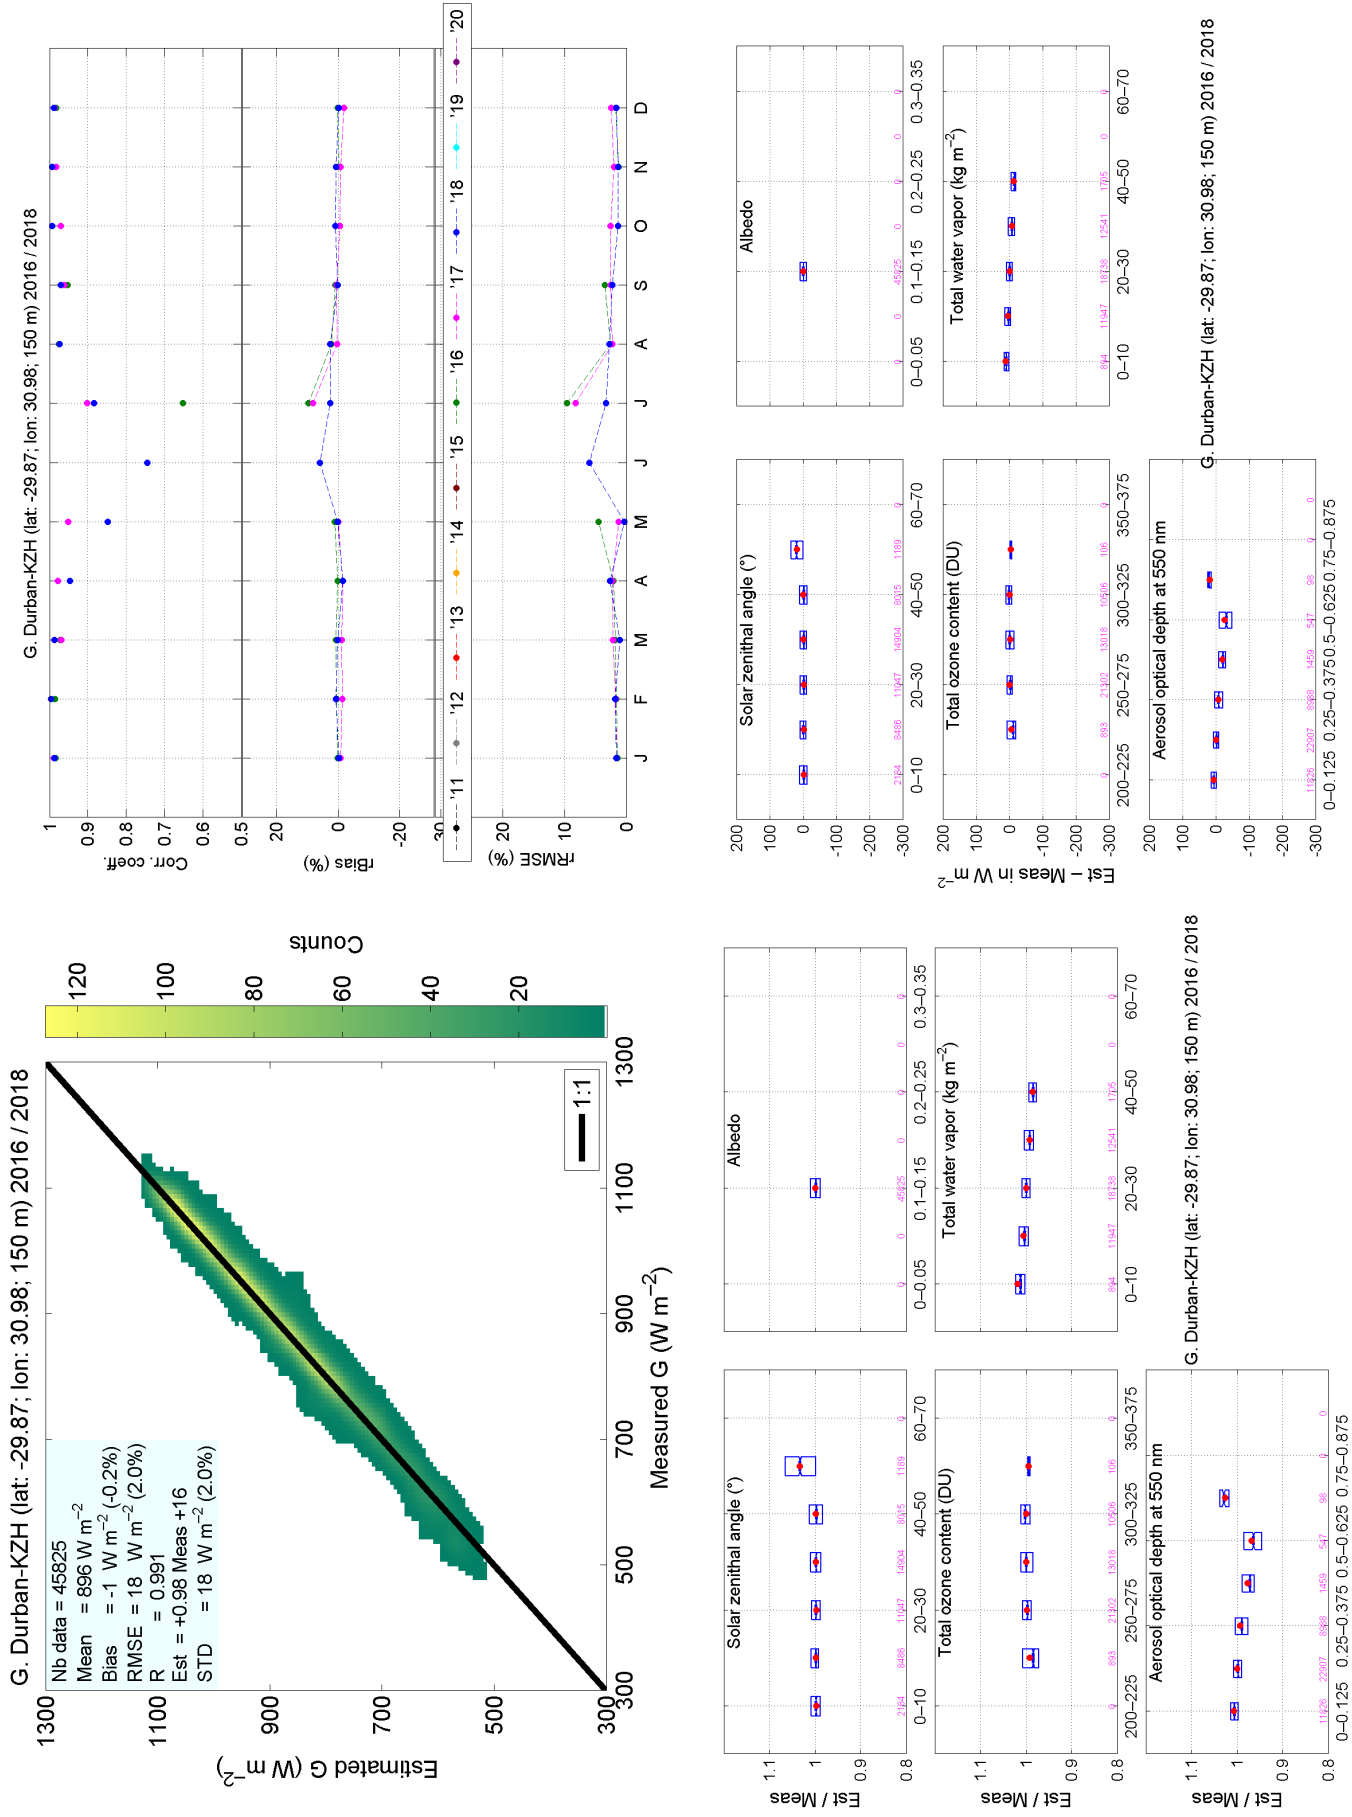

Figure S145: Comparison on global irradiance at Durban-KZH

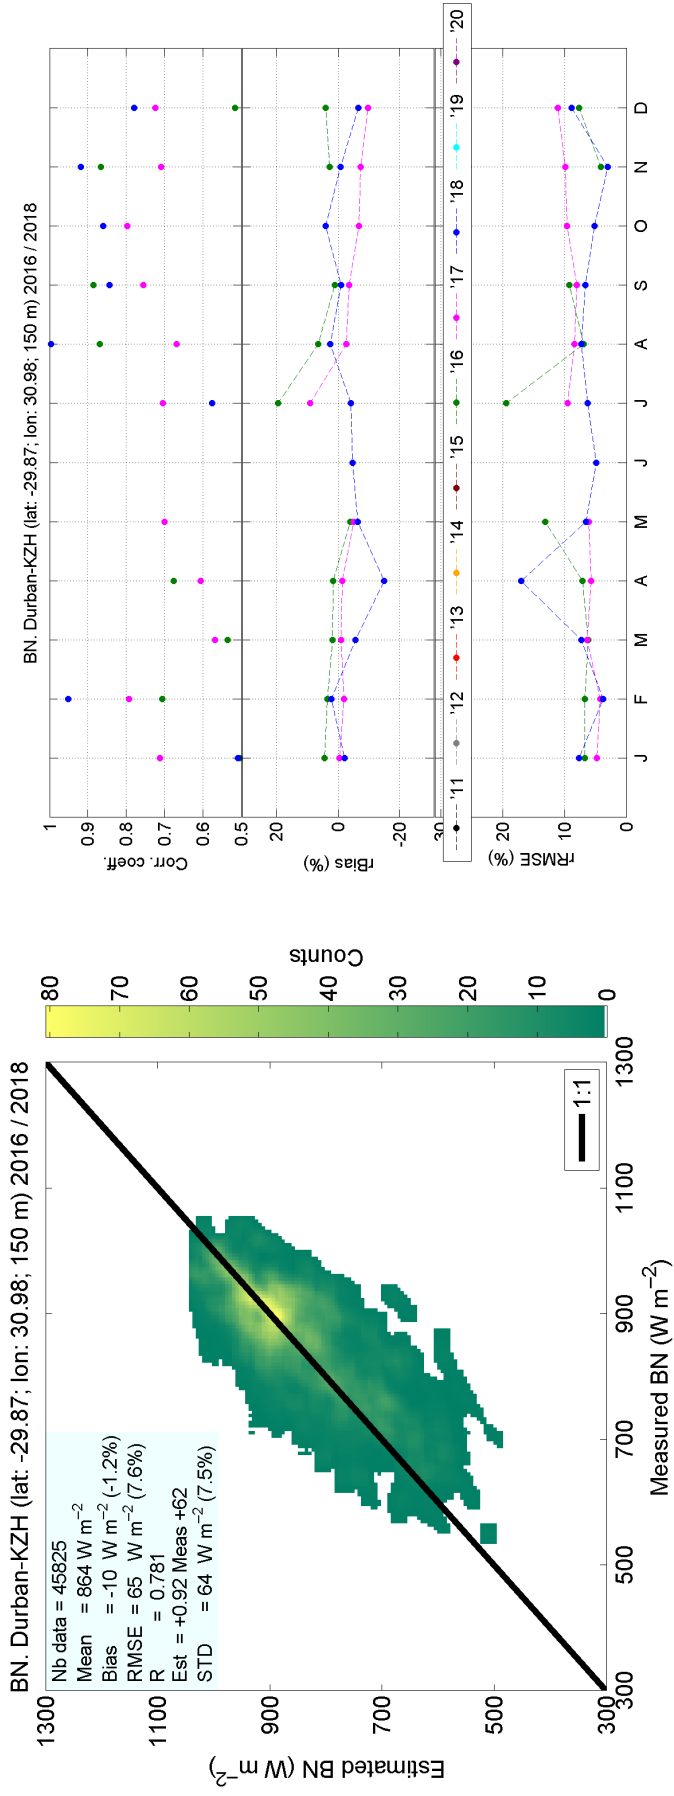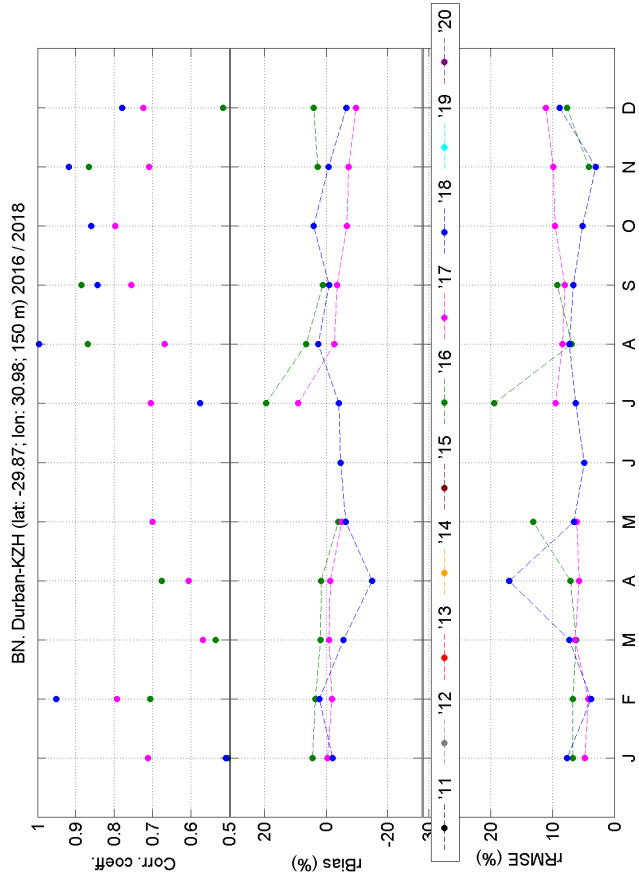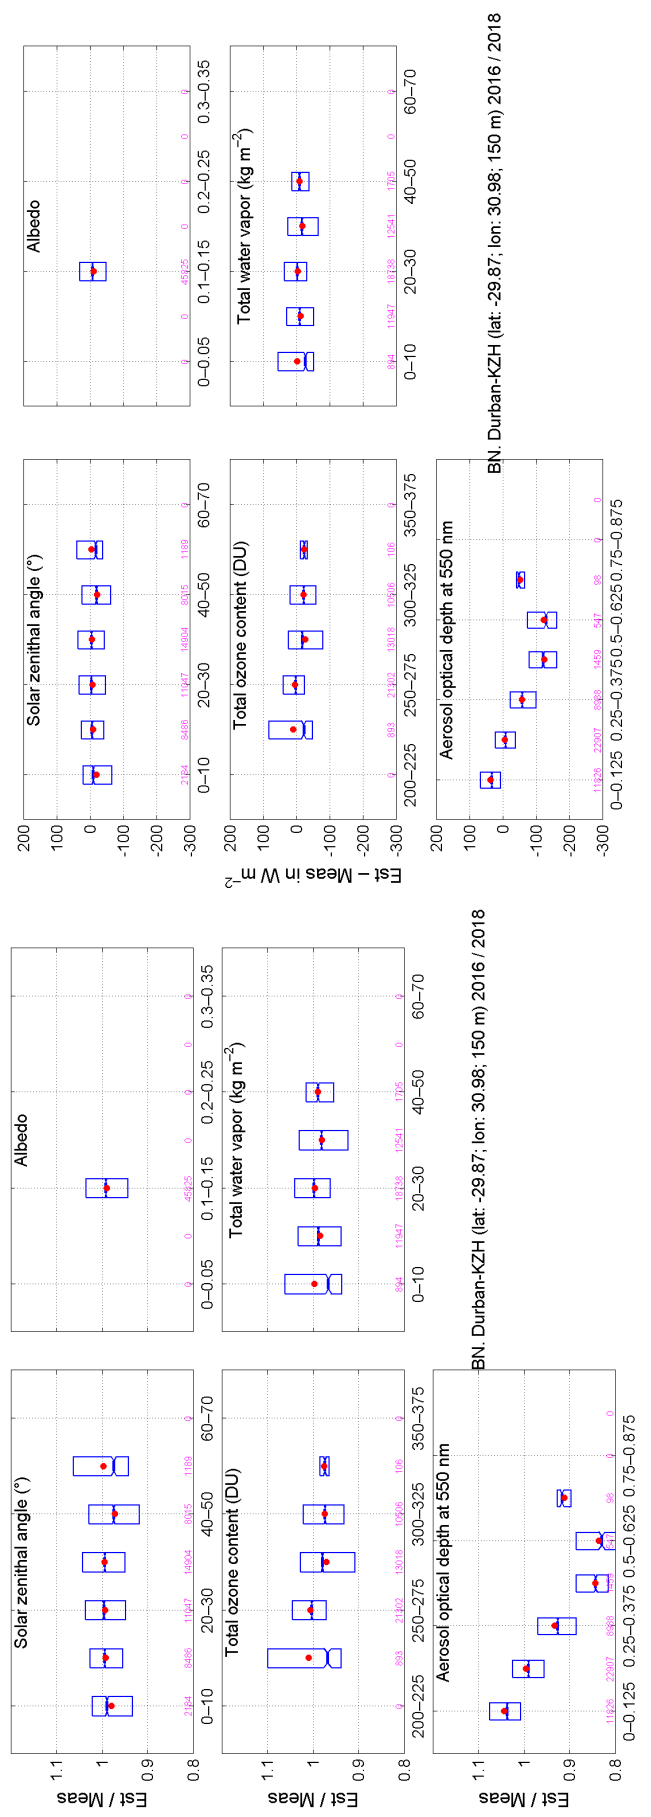

Figure S146: Comparison on direct component at normal irradiance at Durban-KZH

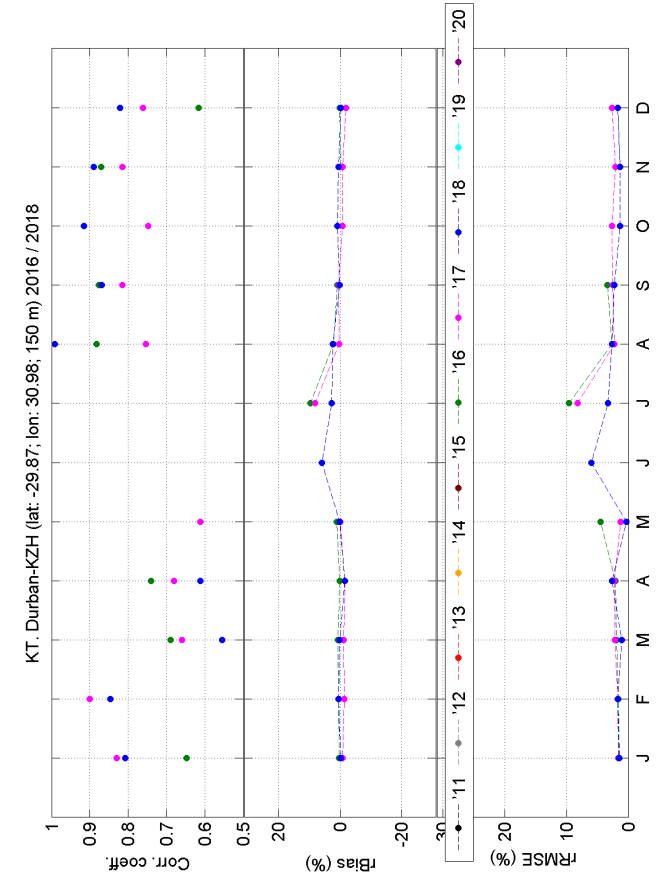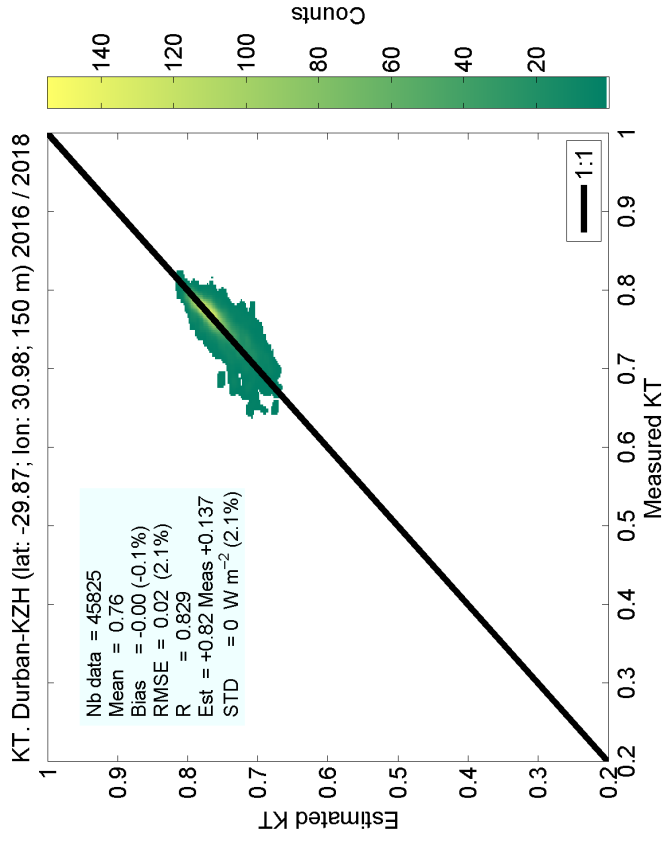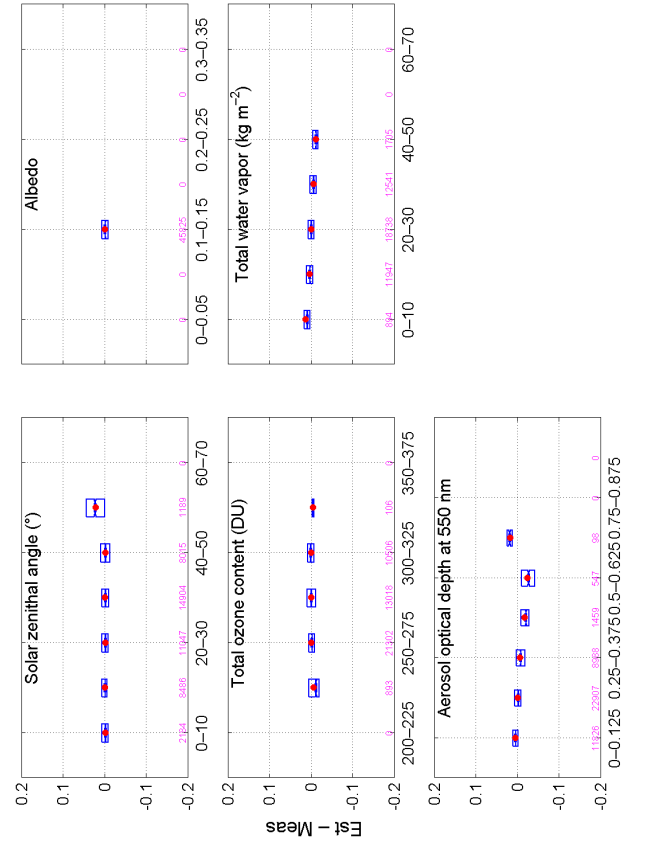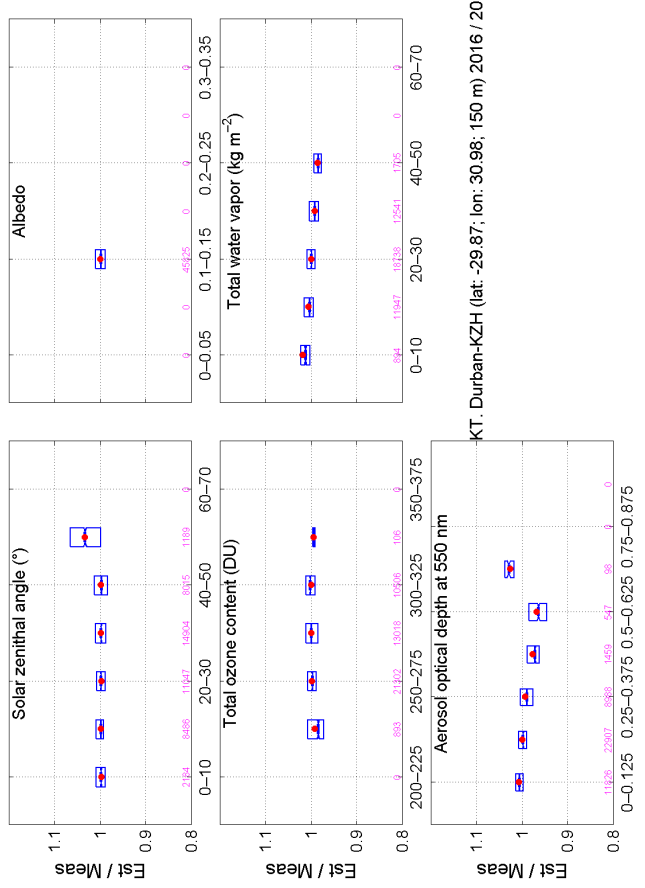

Figure S147: Comparison on clearness index at Durban-KZH

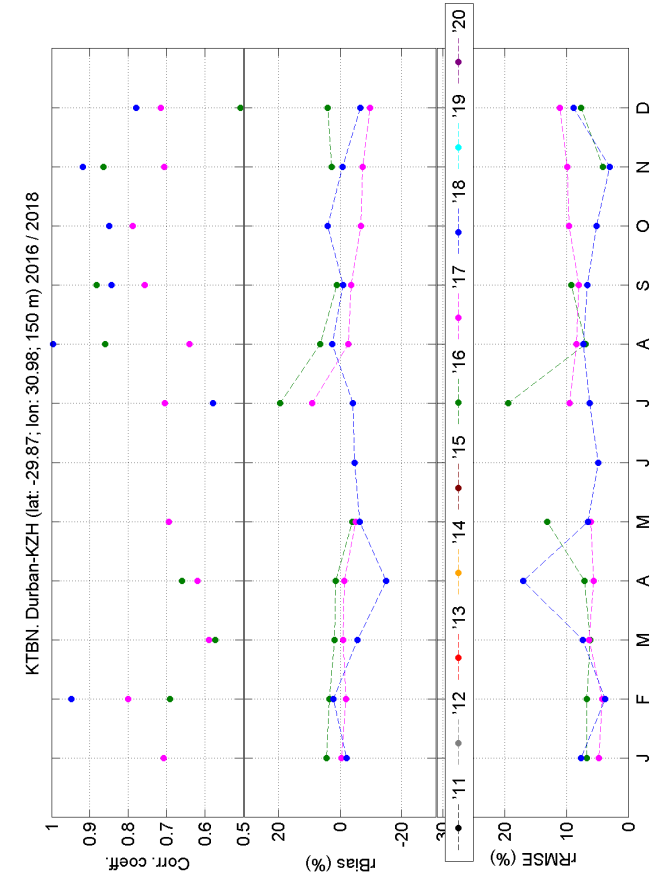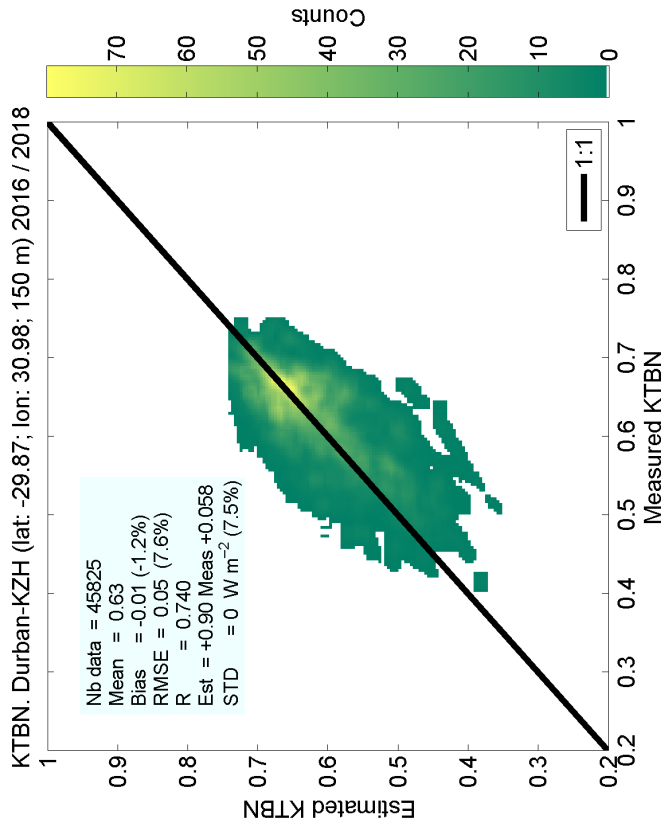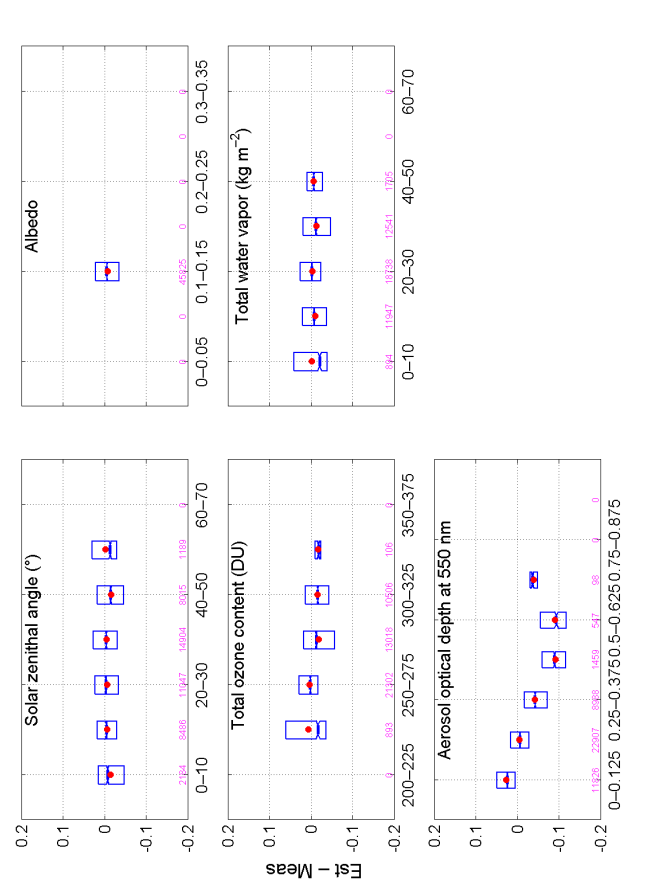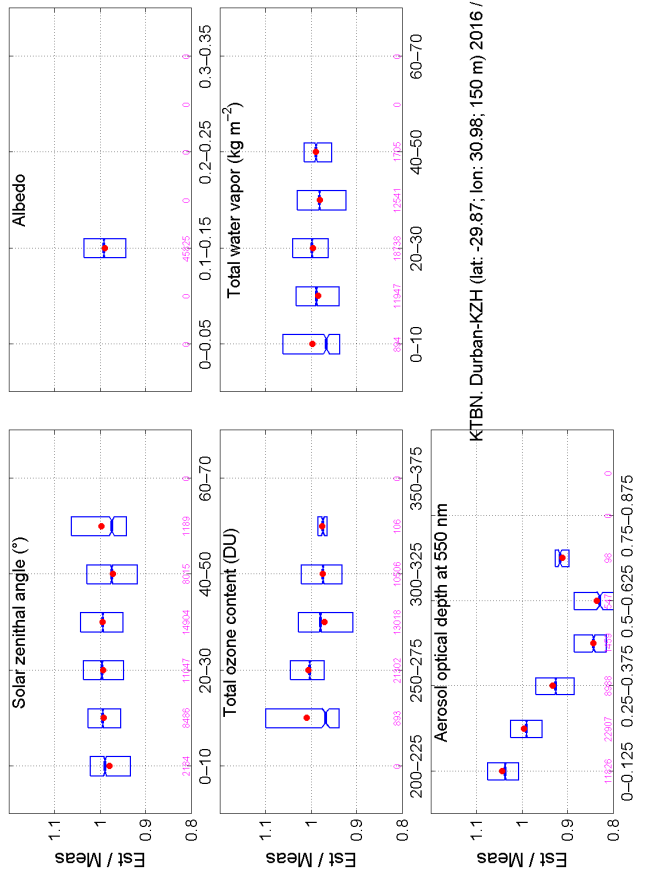

Figure S148: Comparison on direct clearness index at Durban-KZH

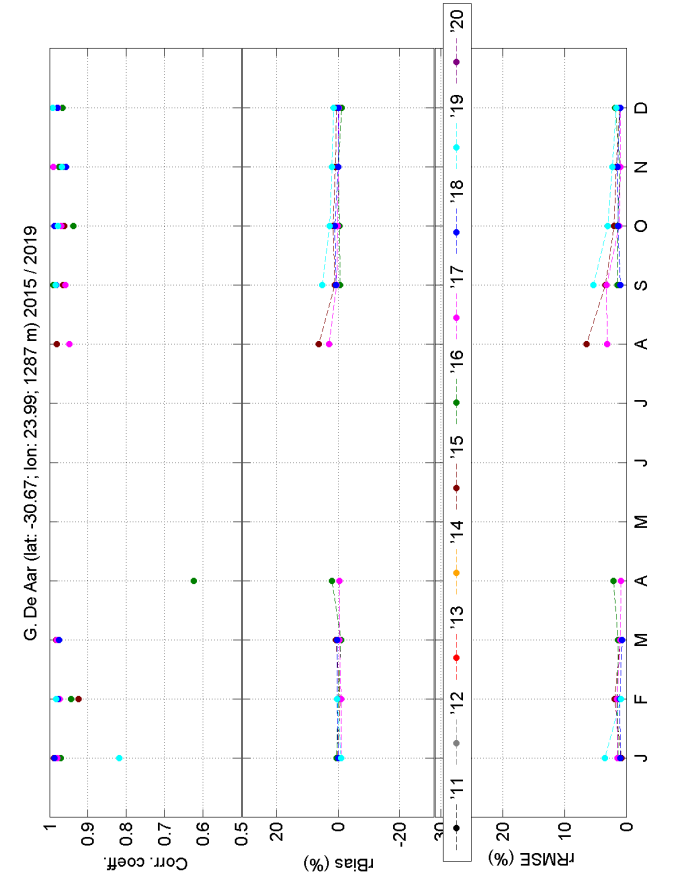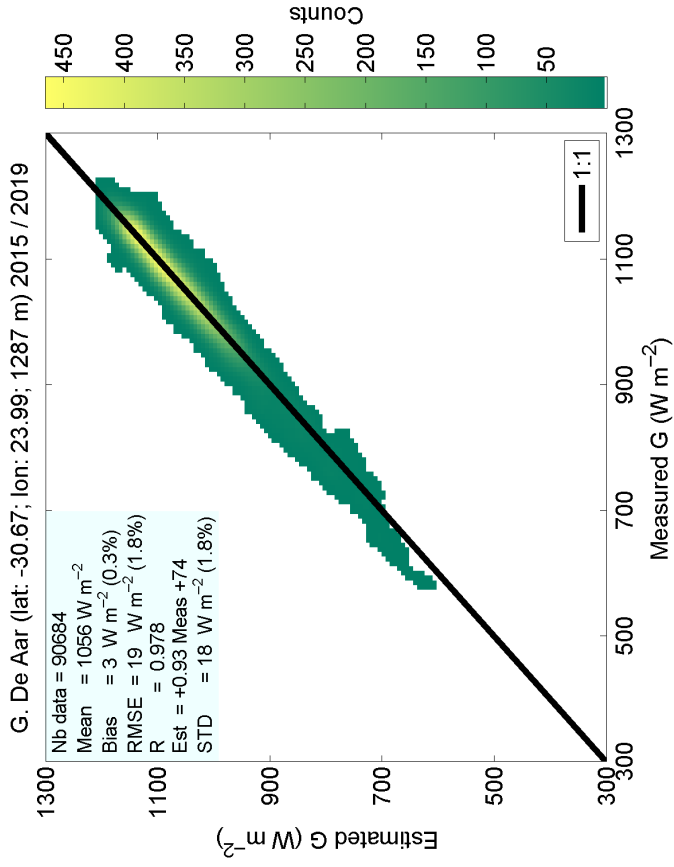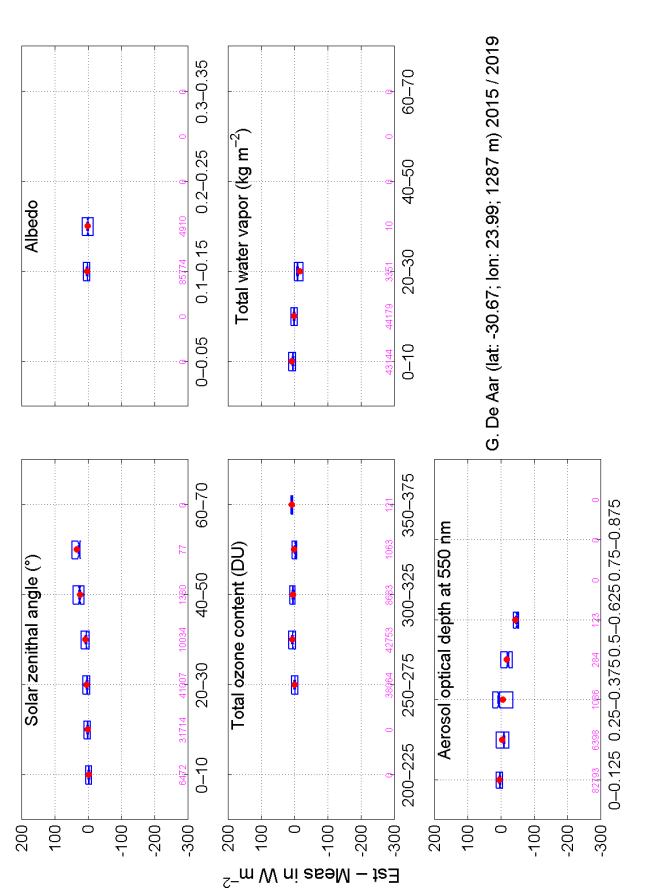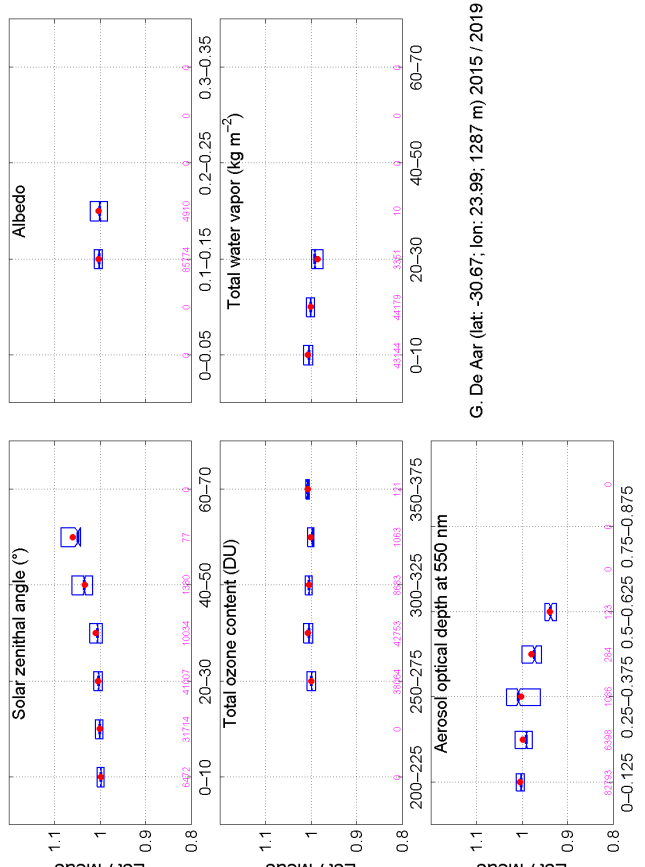

Figure S149: Comparison on global irradiance at De Aar

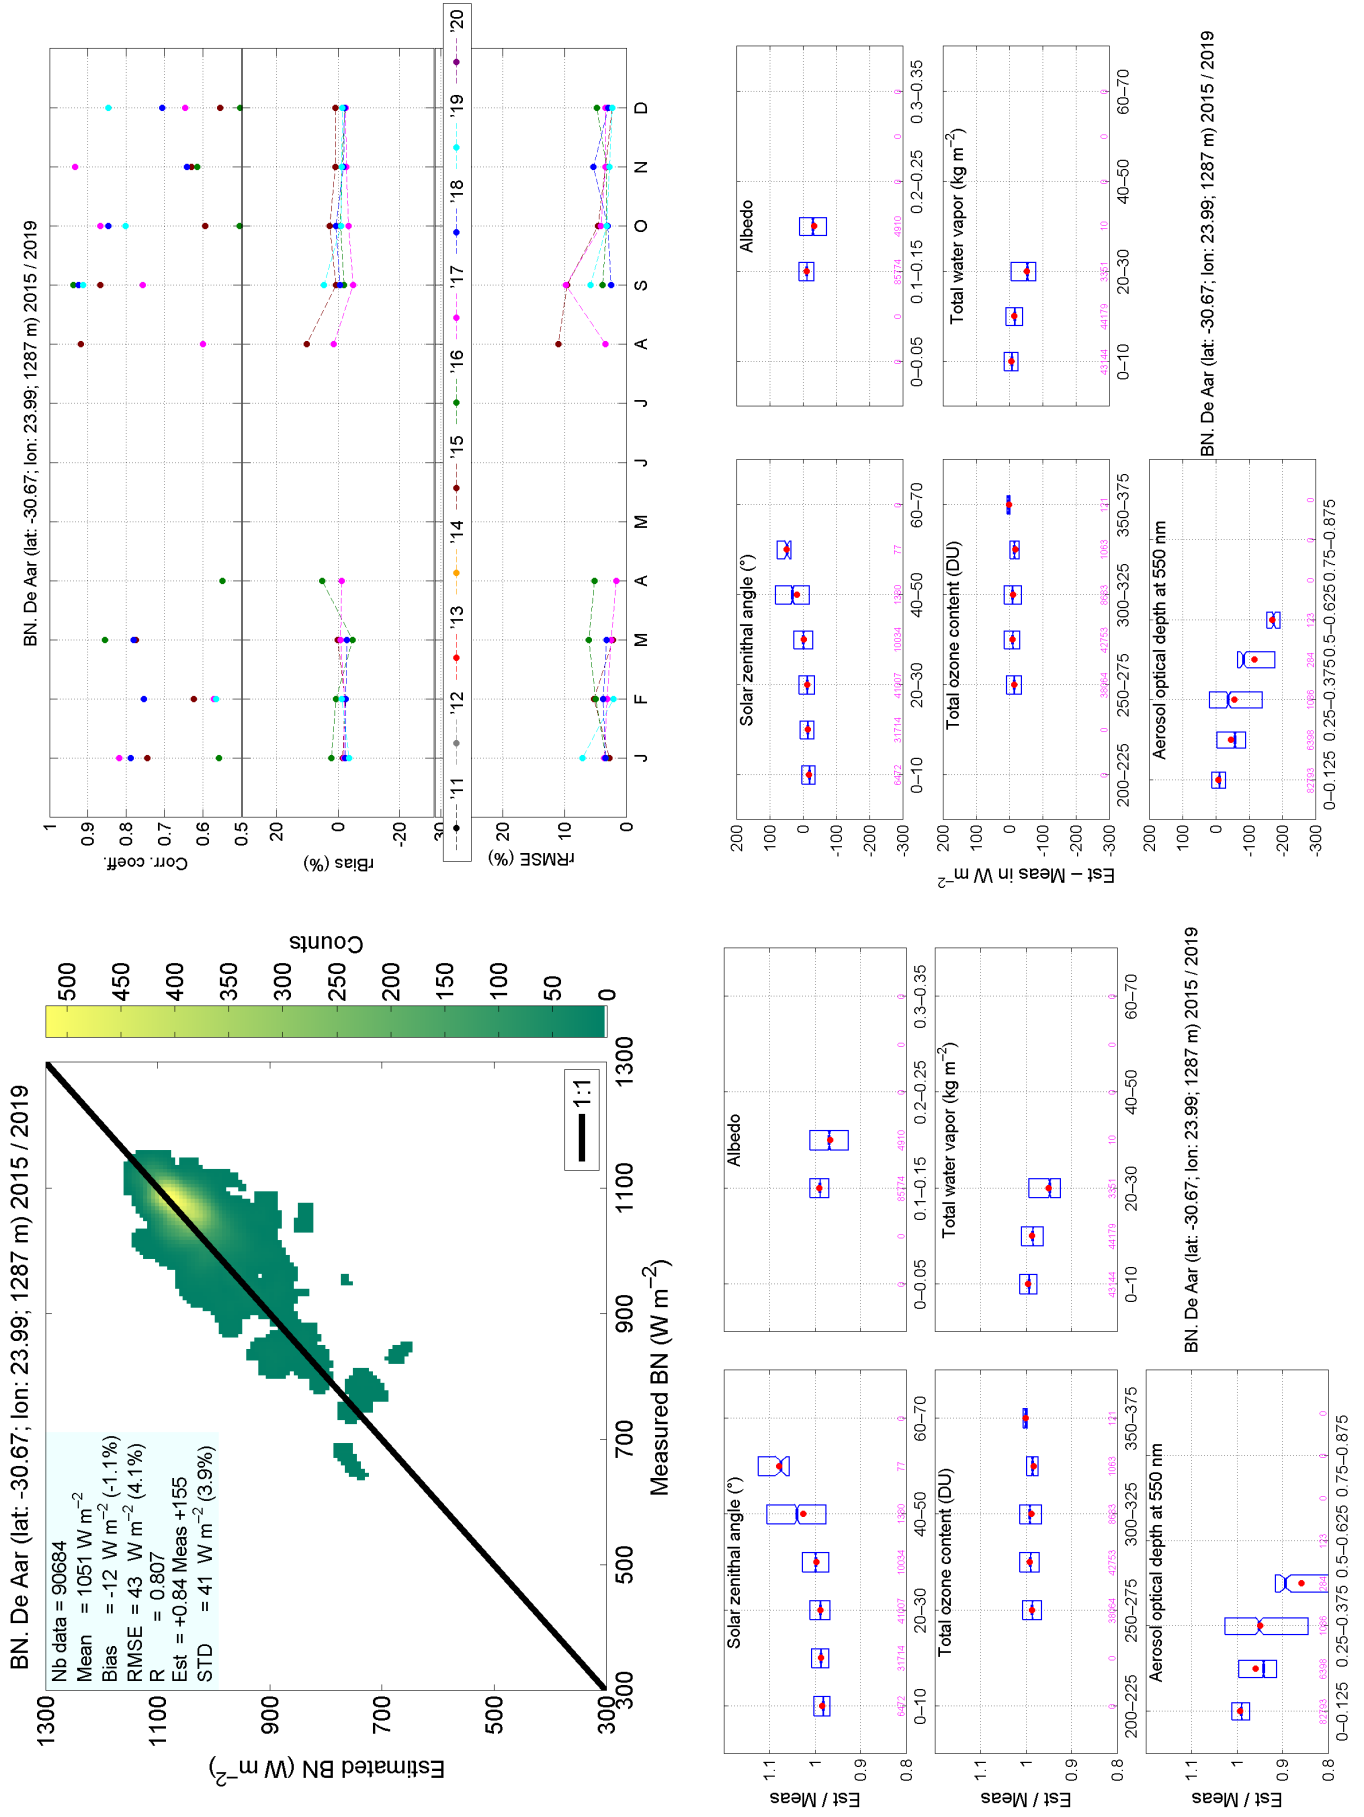

Figure S150: Comparison on direct component at normal irradiance at De Aar



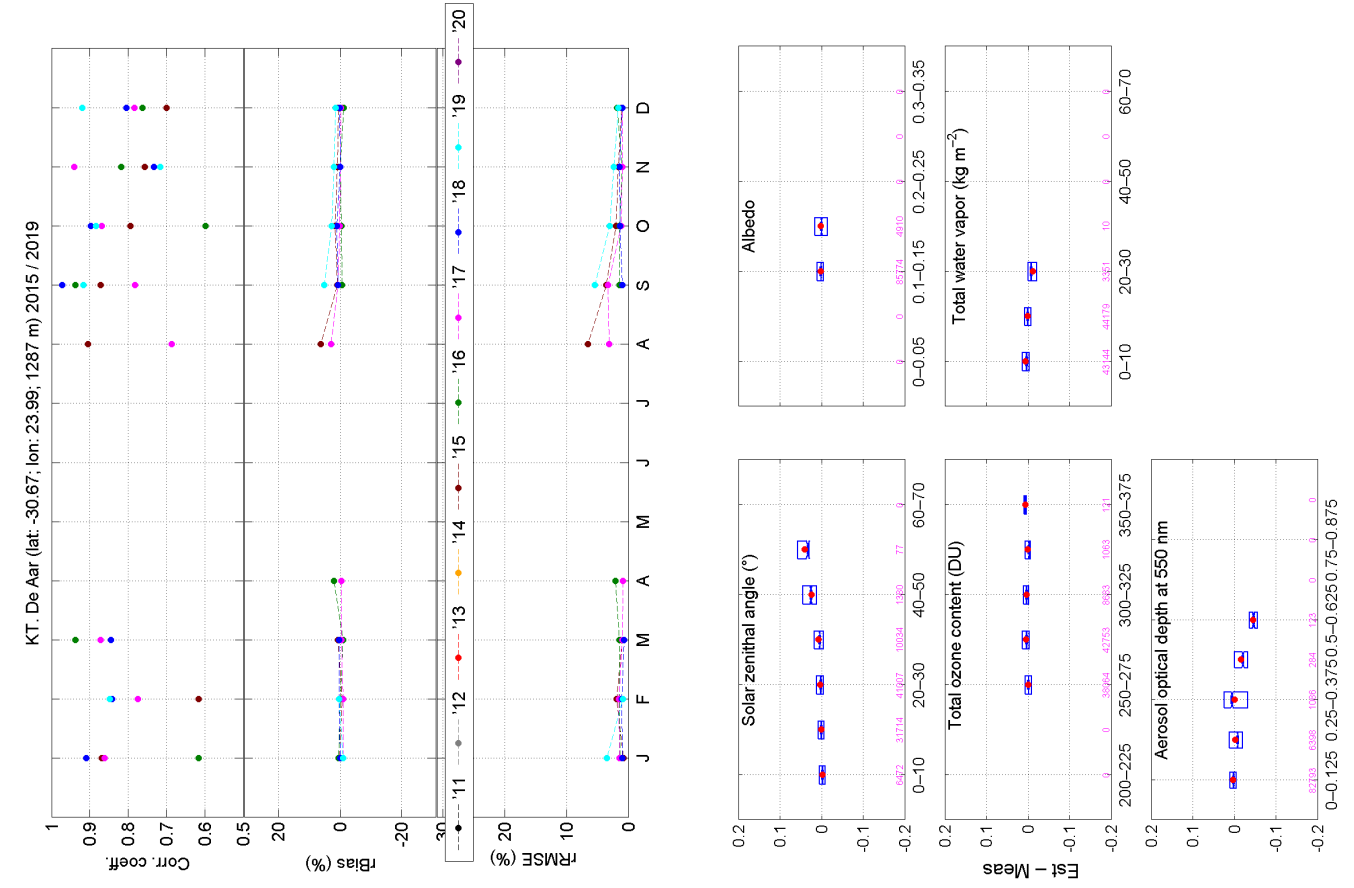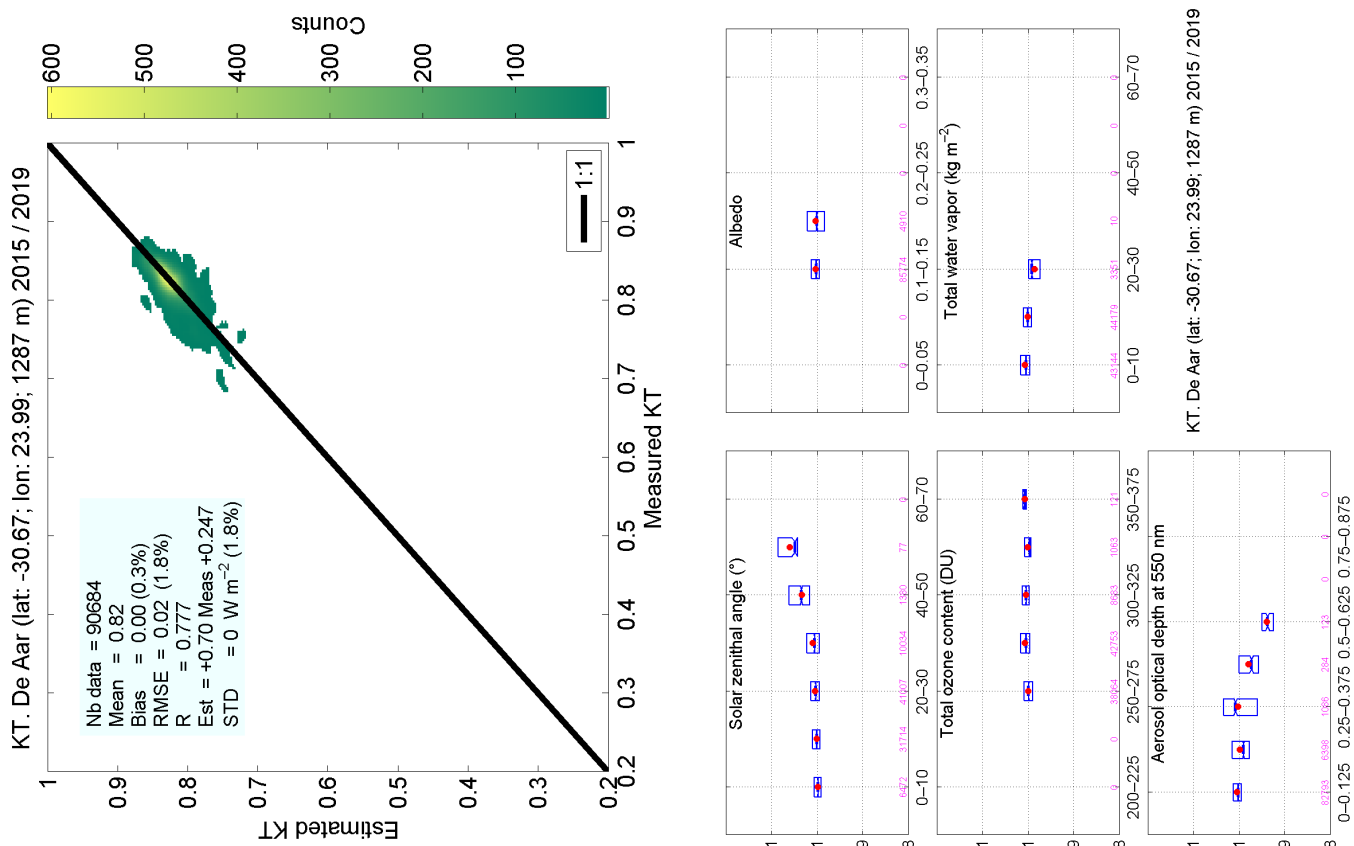

Figure S151: Comparison on clearness index at De Aar

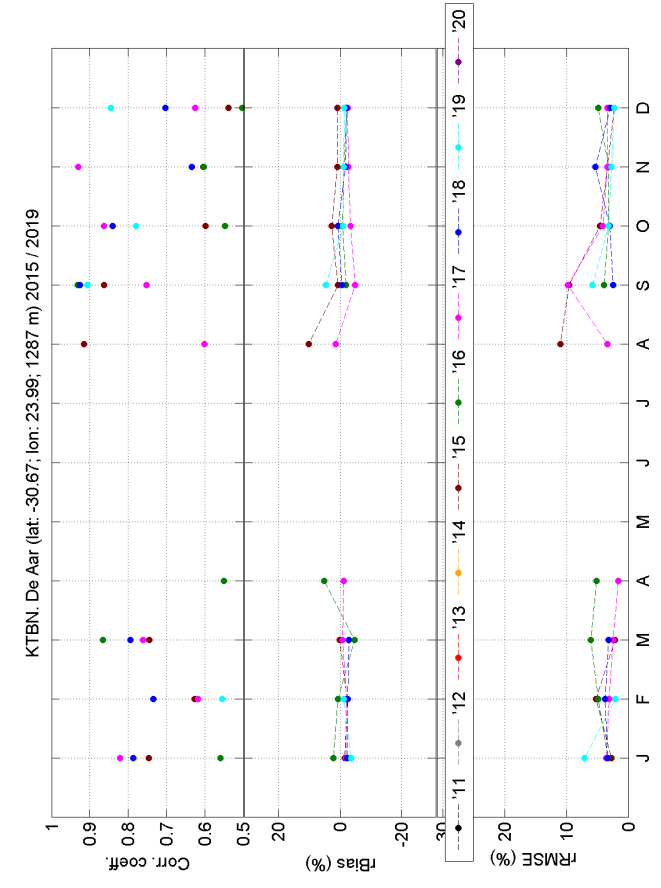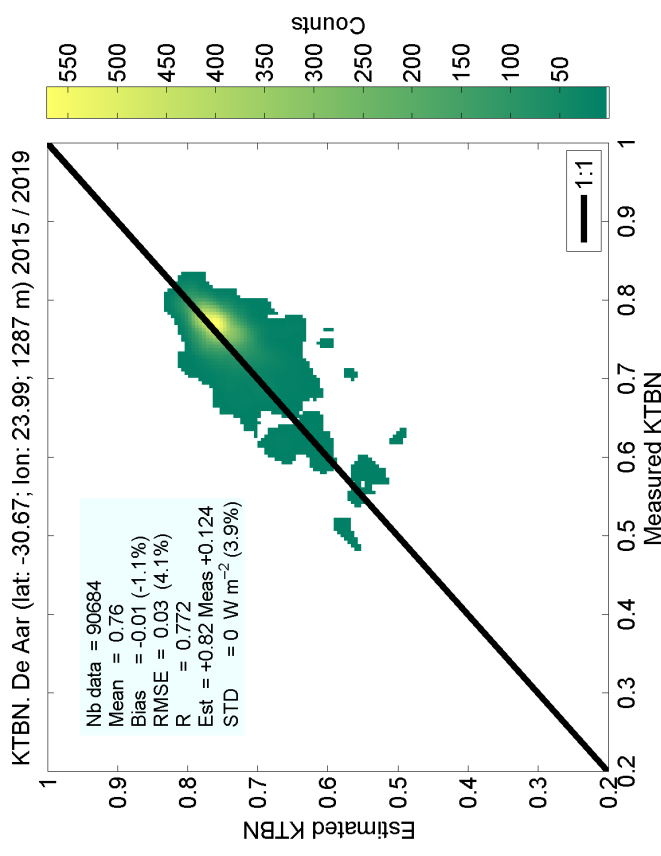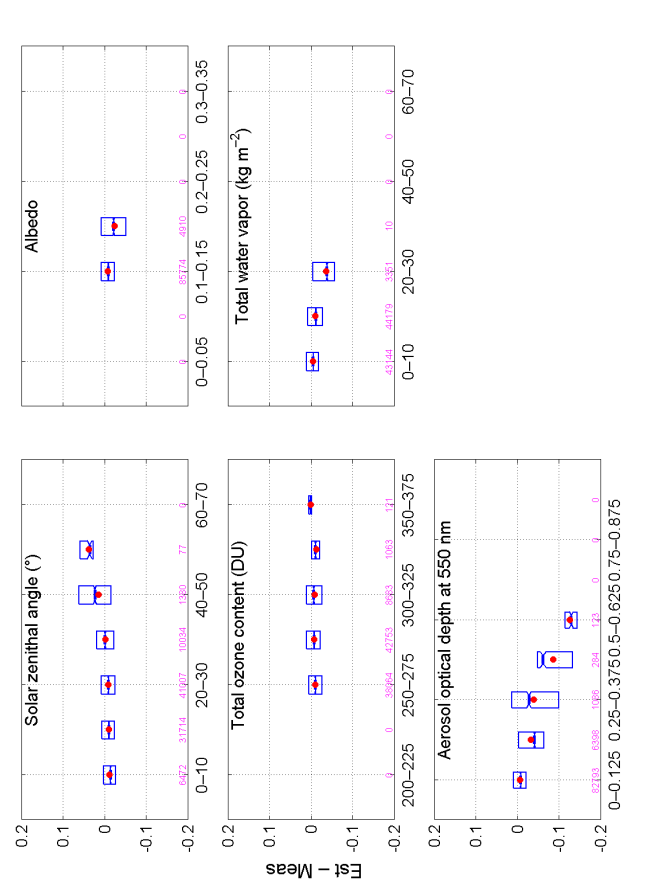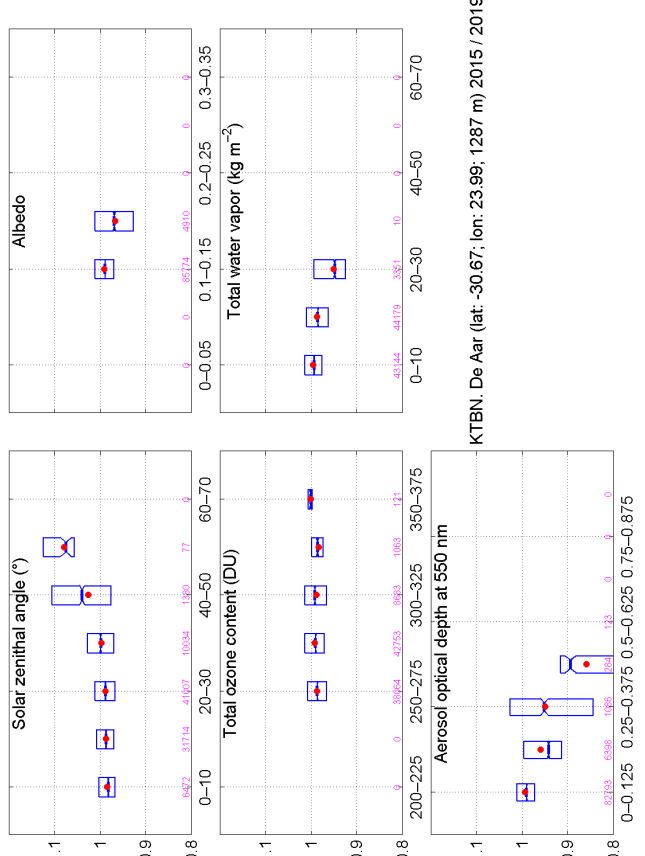

Figure S152: Comparison on direct clearness index at De Aar

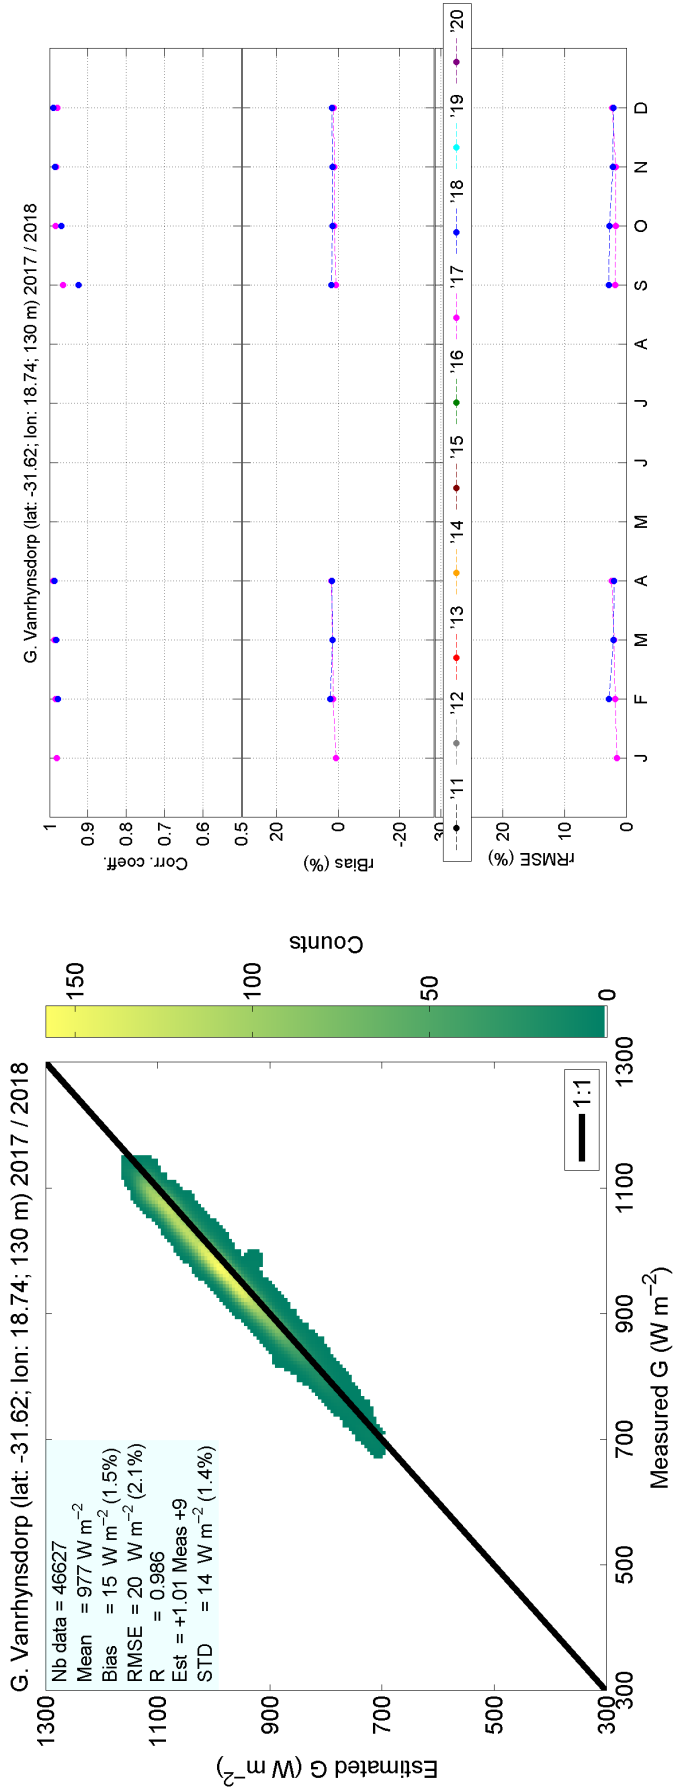

G. Vanrhynsdorp (lat: -31.62; lon: 18.74; 130 m) 2017 / 2018

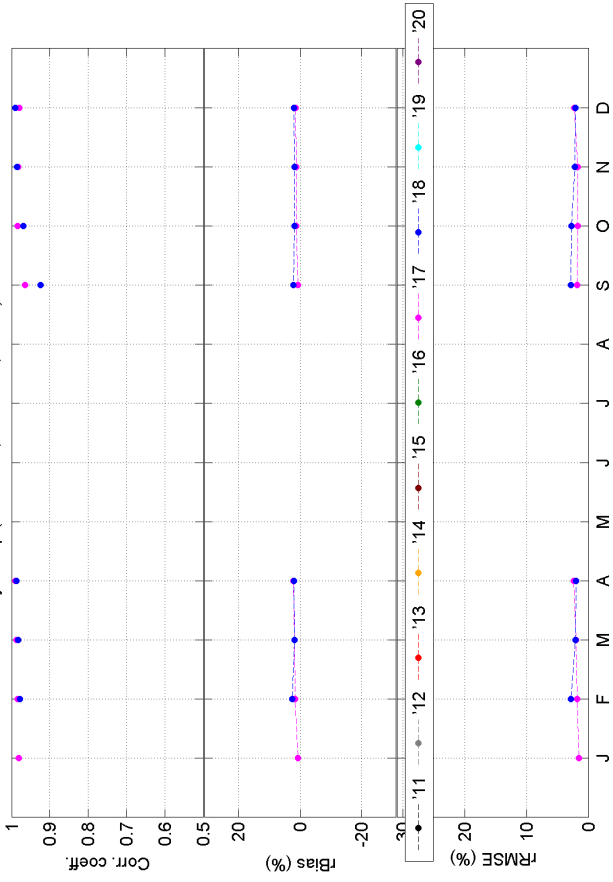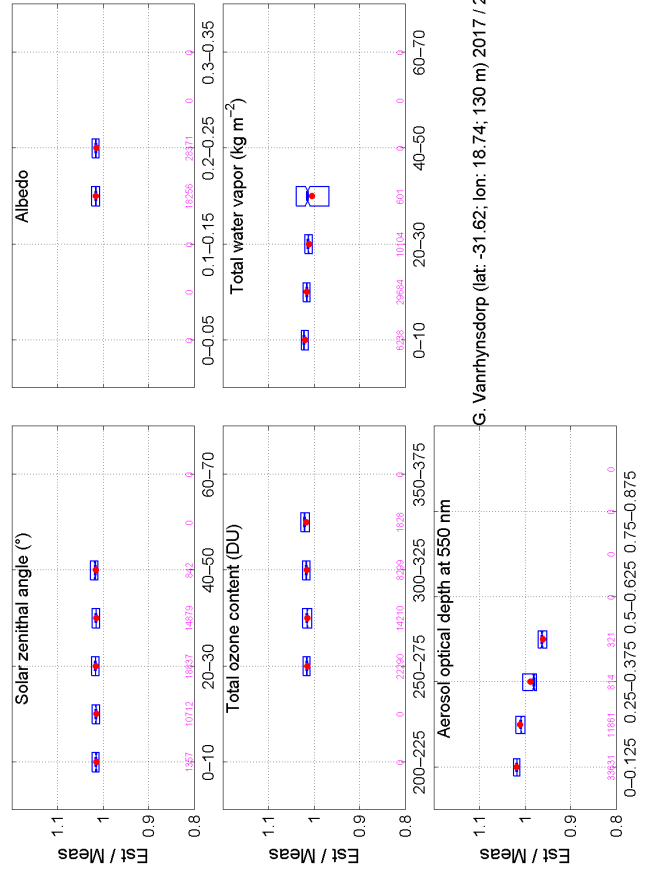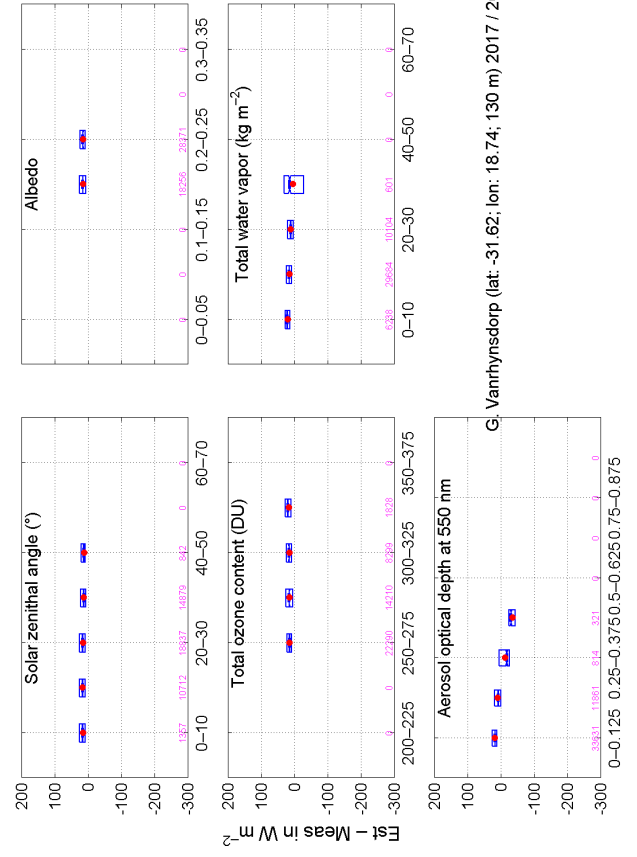

Figure S153: Comparison on global irradiance at Vanrhynsdorp

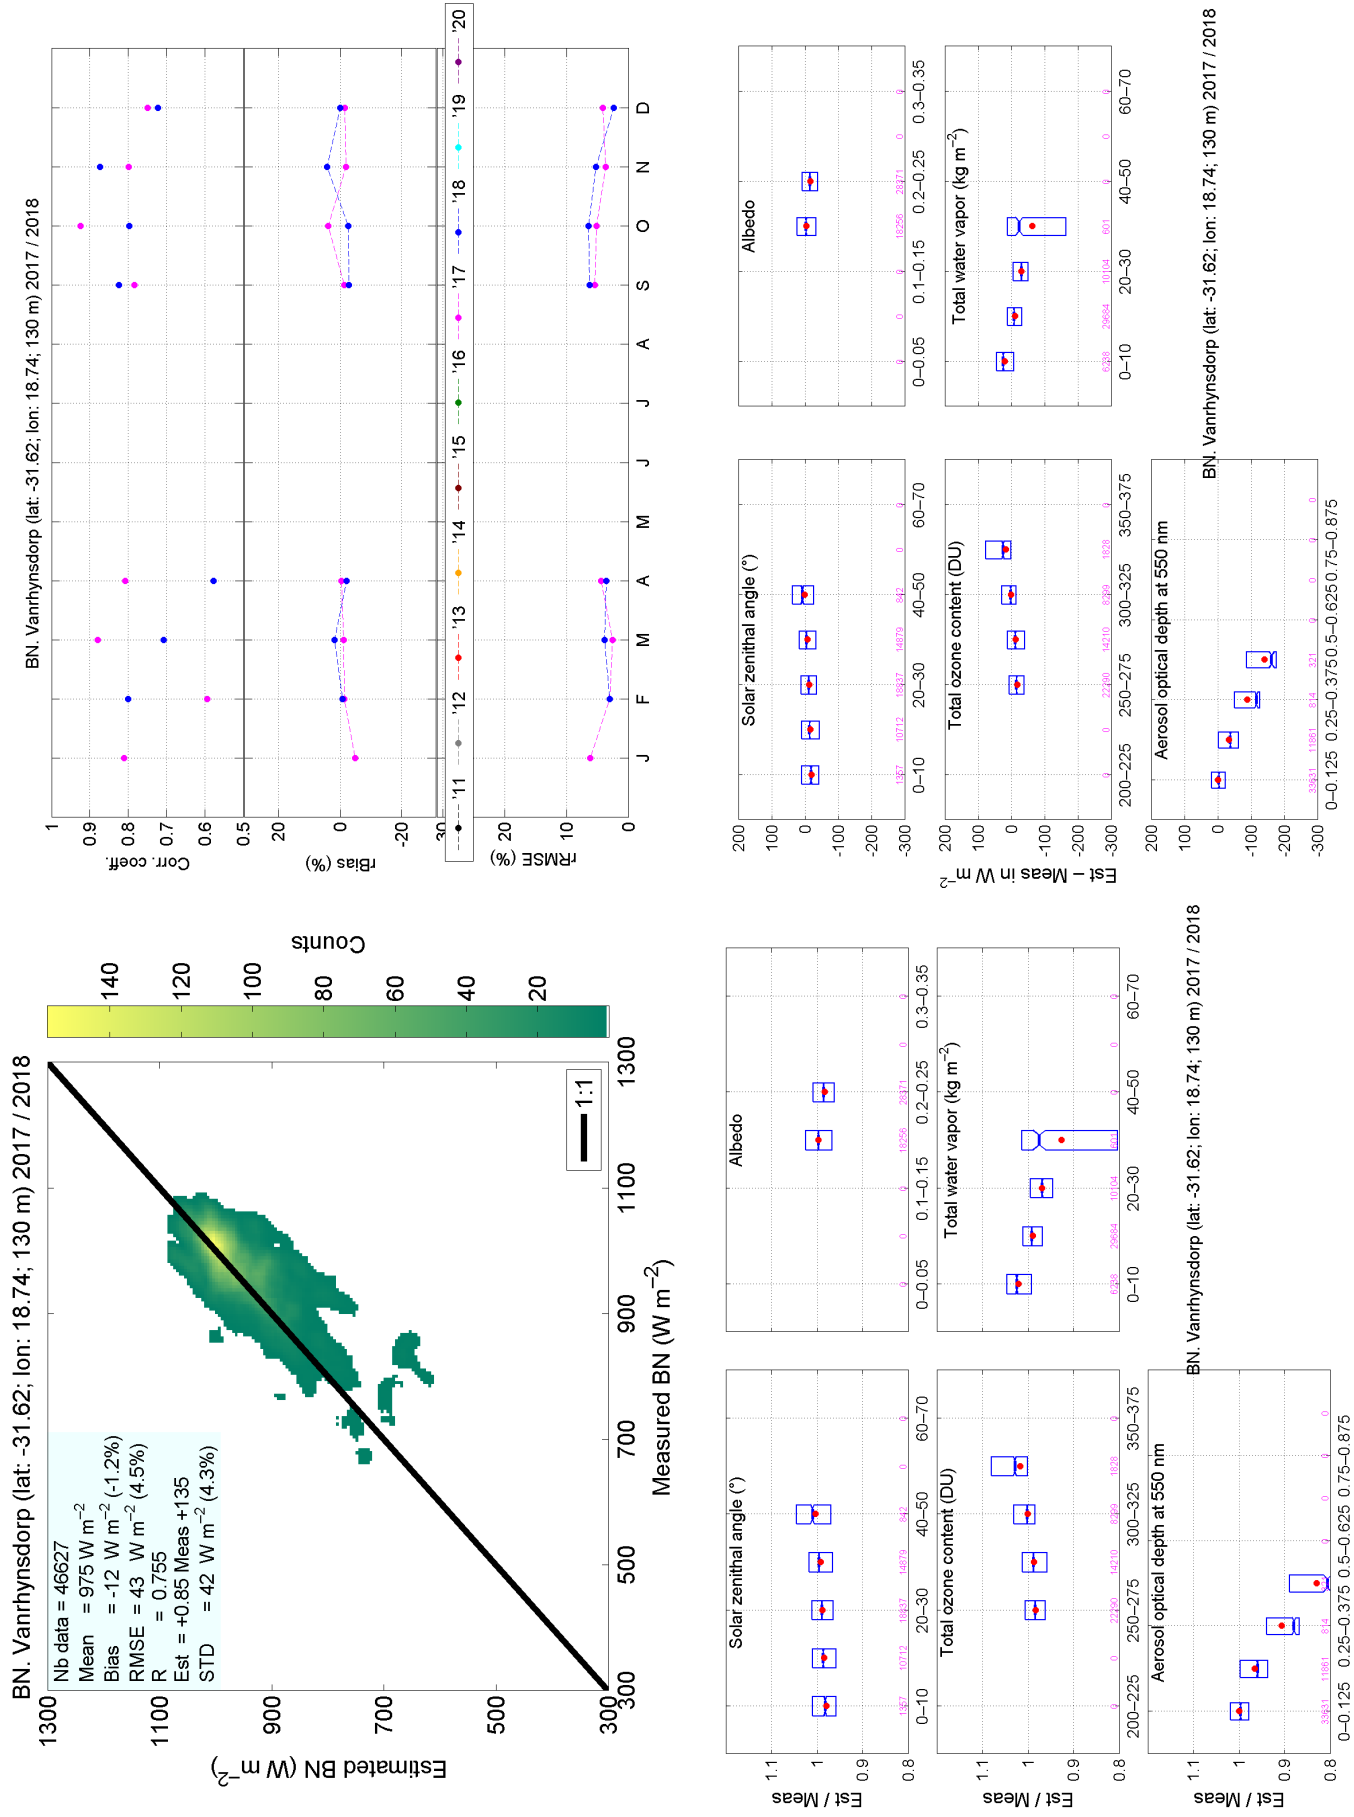

Figure S154: Comparison on direct component at normal irradiance at Vanrhynsdorp

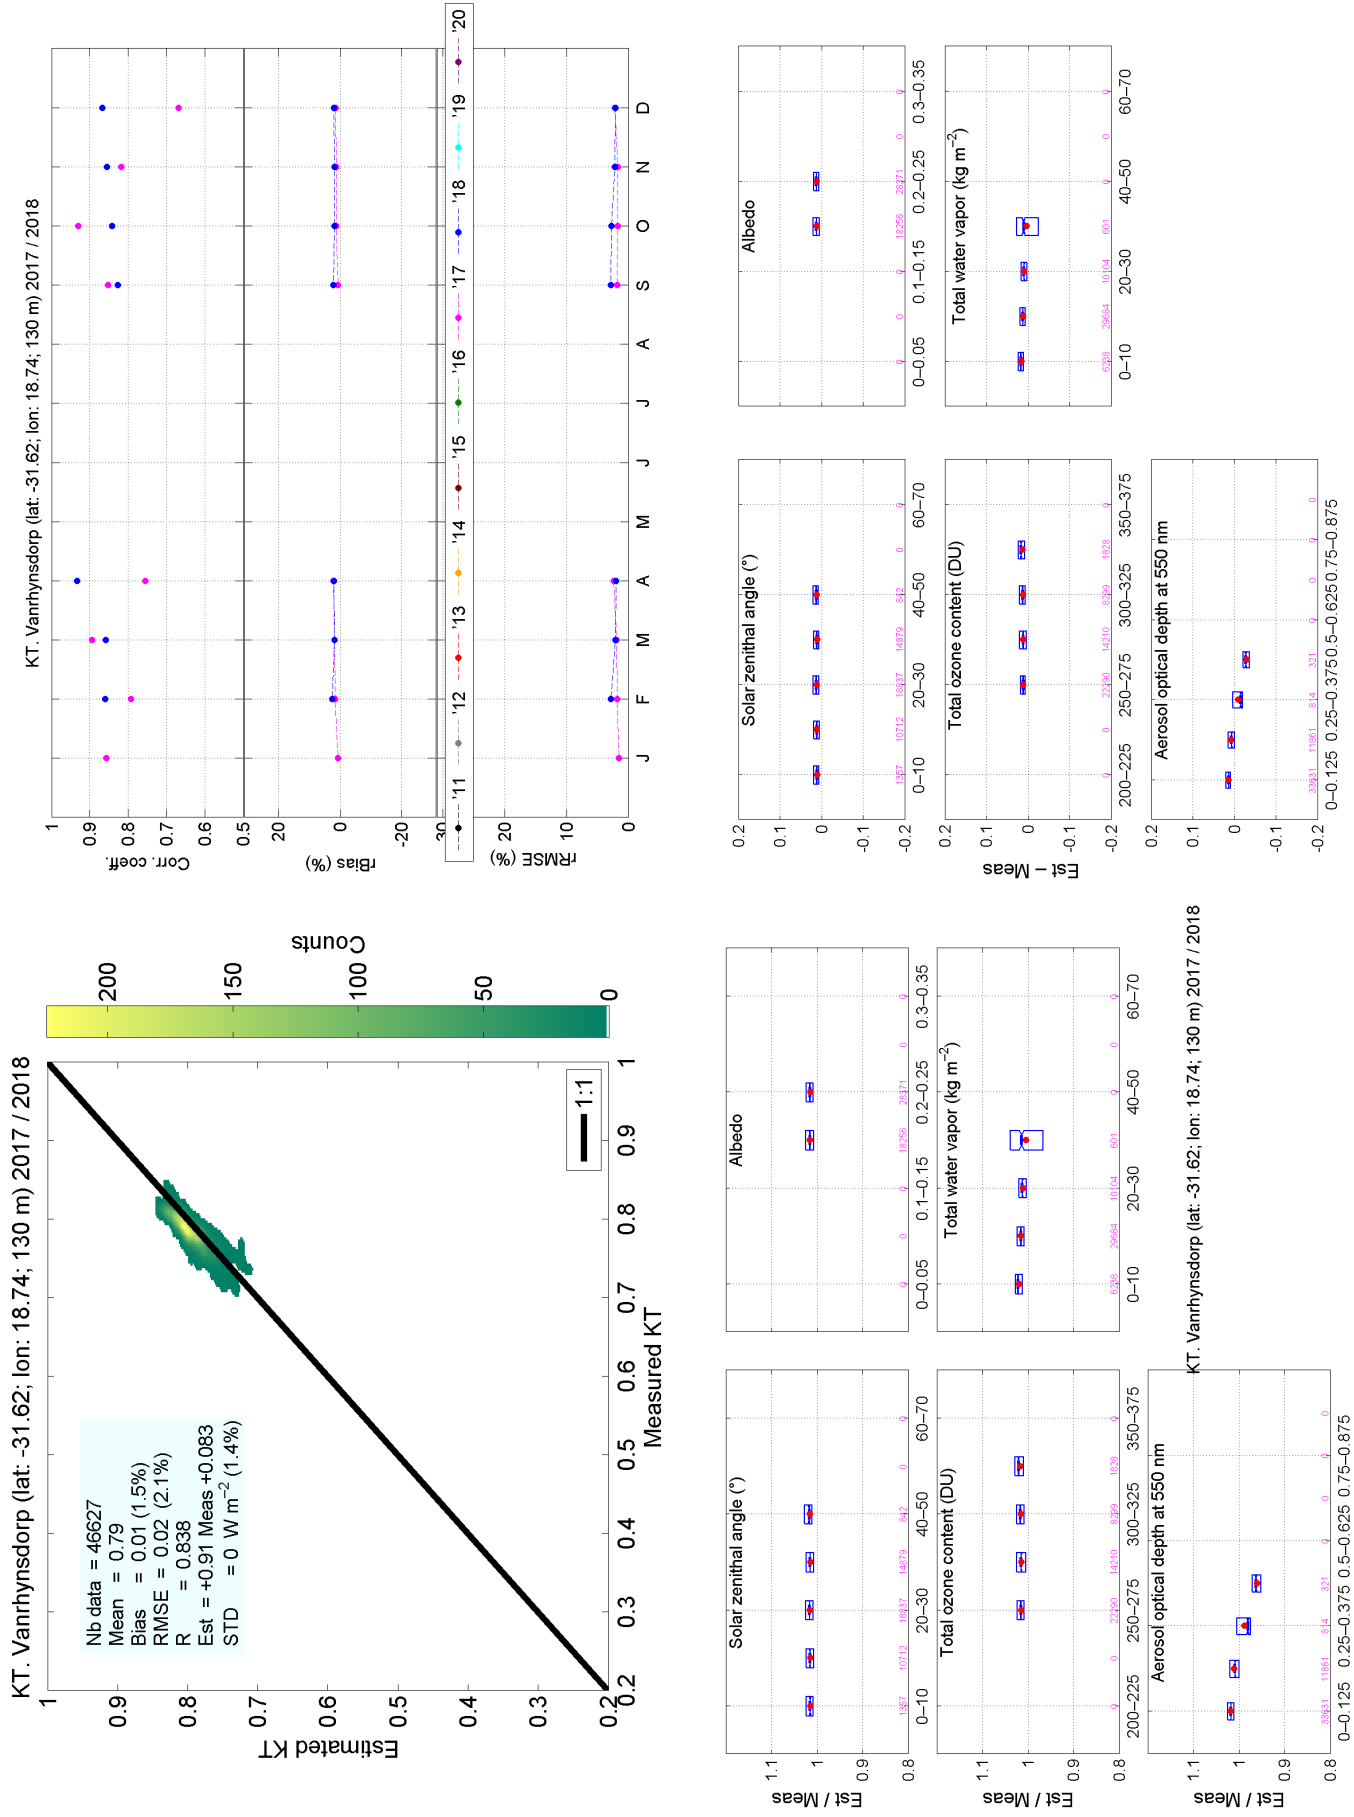

Figure S155: Comparison on clearness index at Vamrhynsdorp

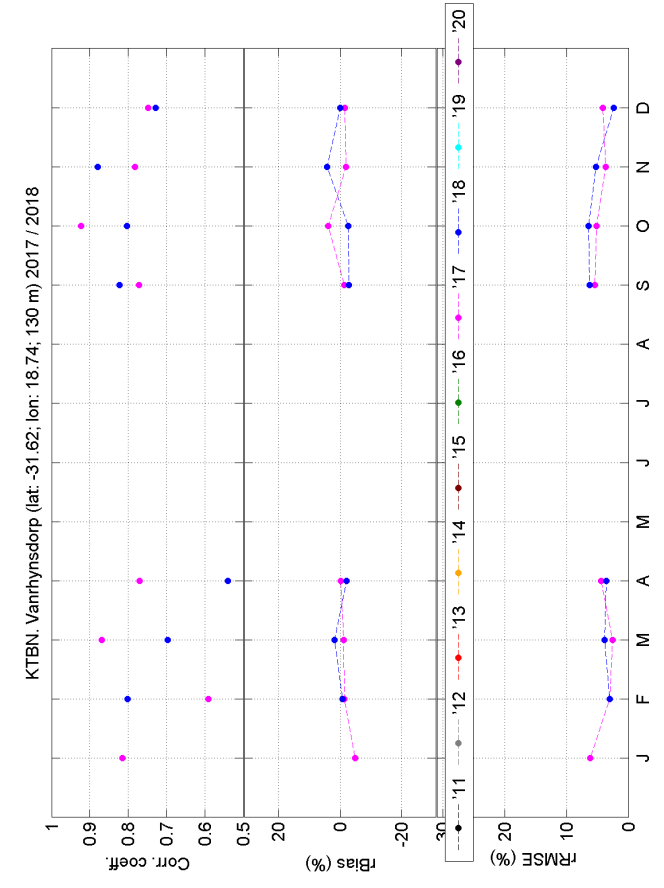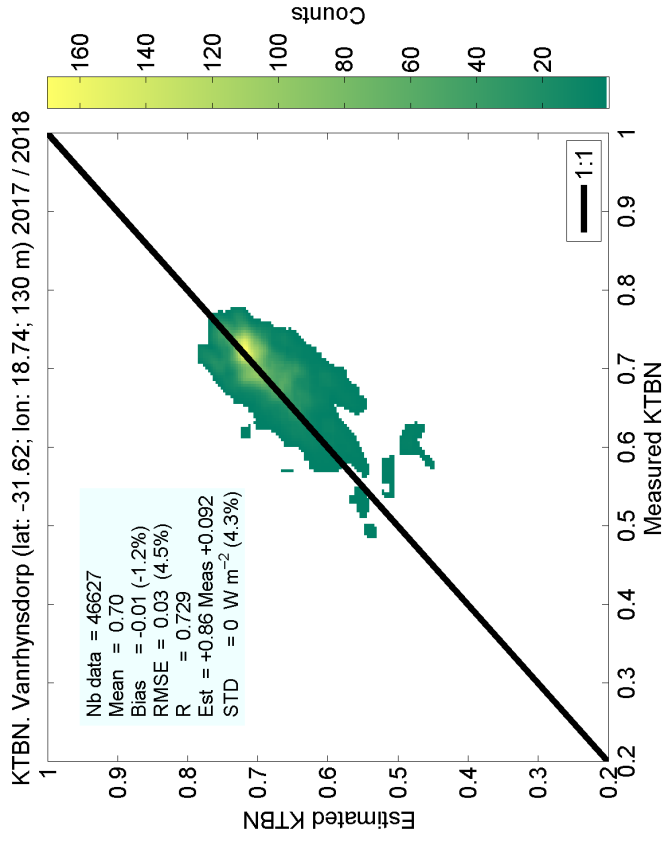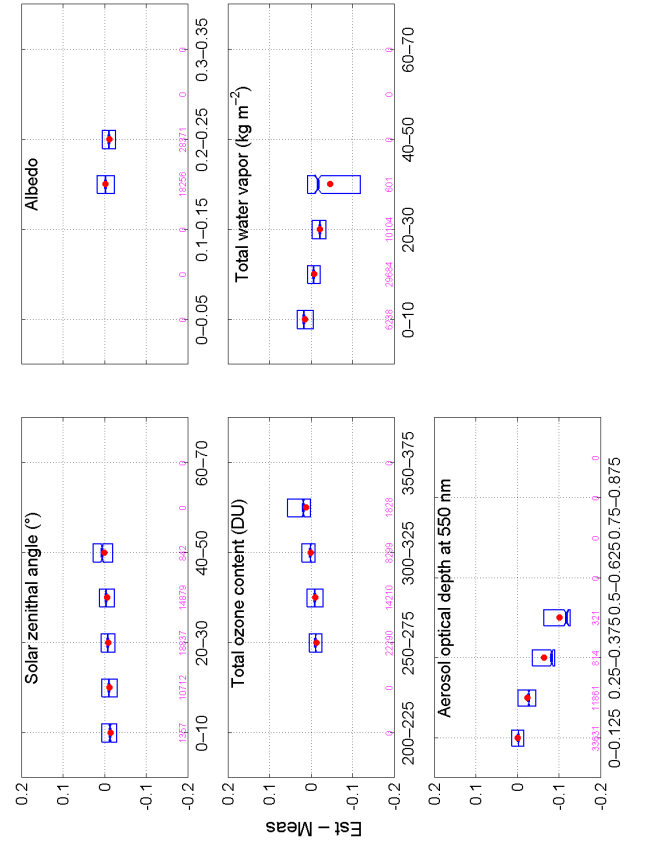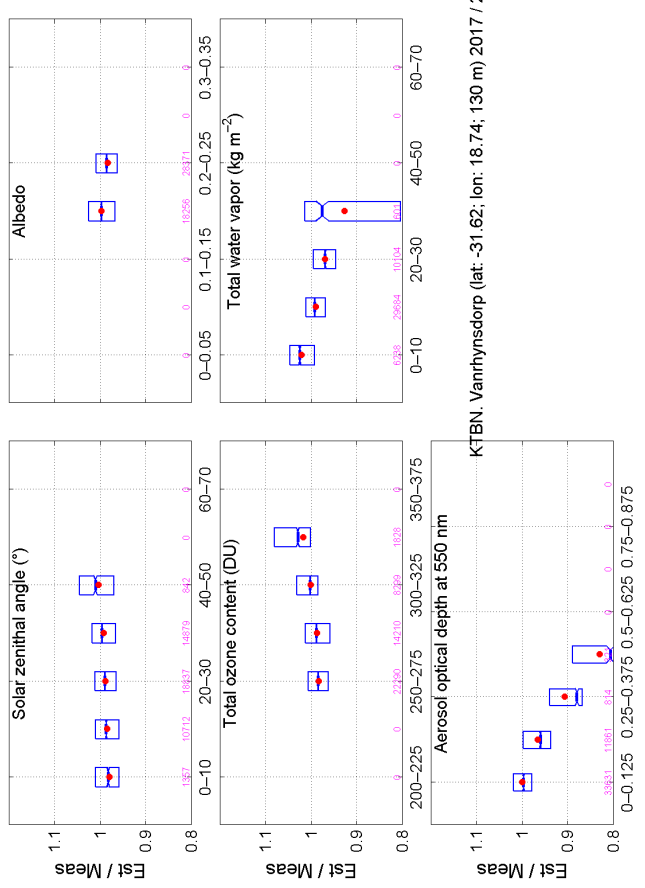

Figure S156: Comparison on direct clearness index at Vanrhynsdorp

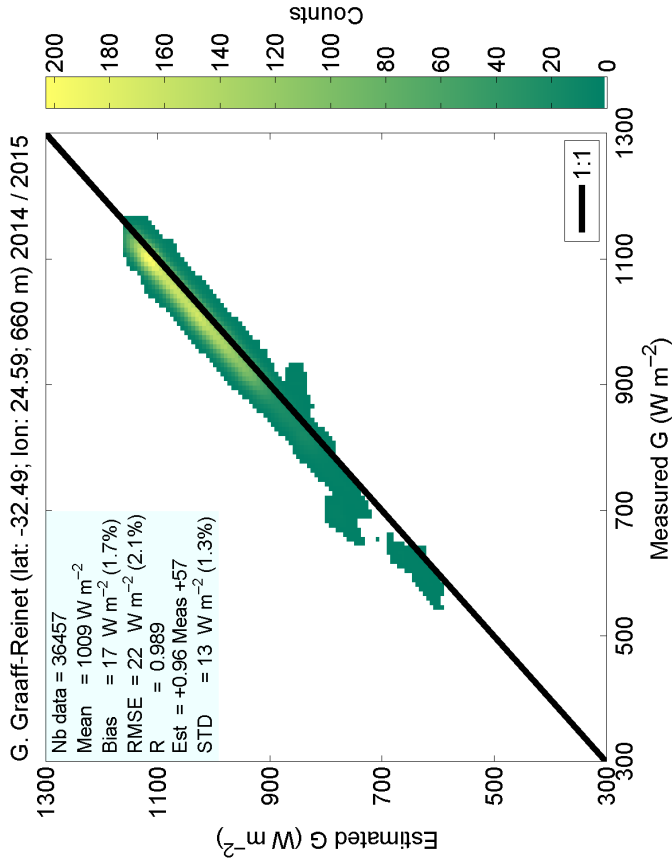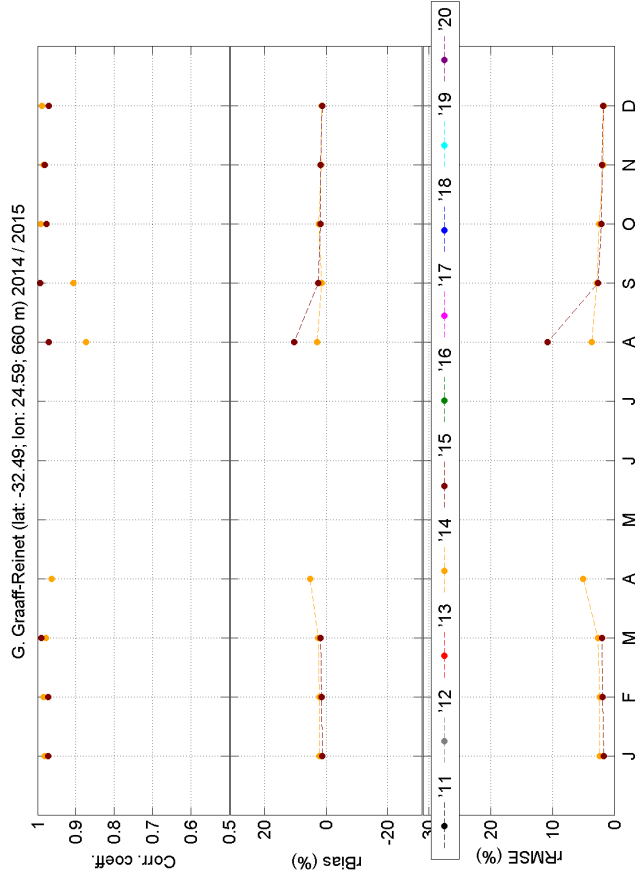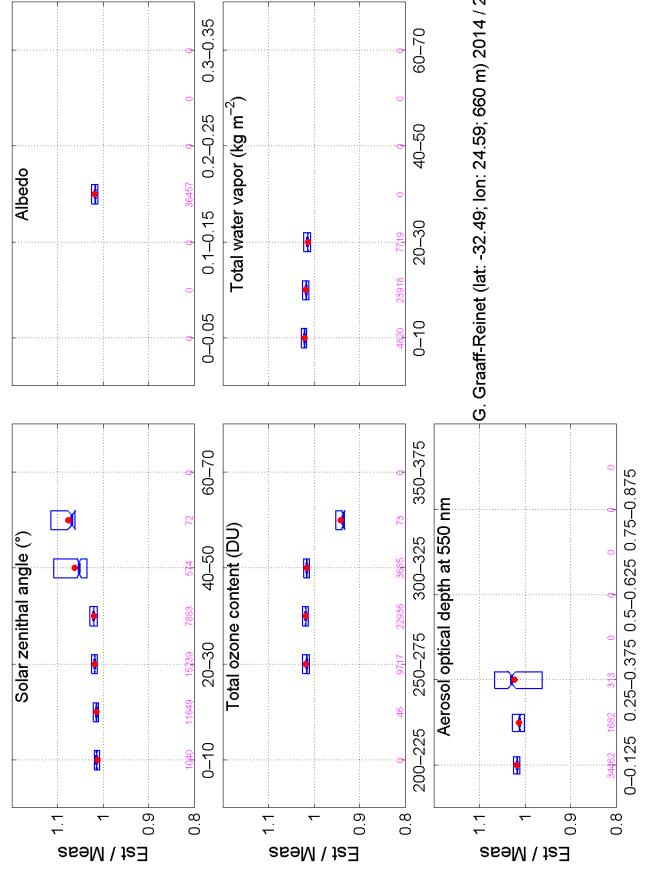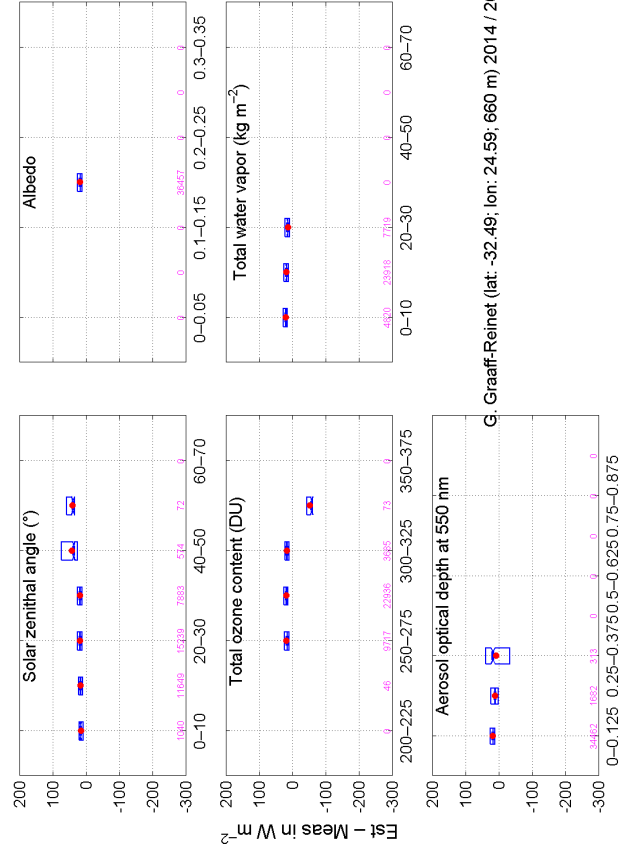

Figure S157: Comparison on global irradiance at Graaff-Reinet

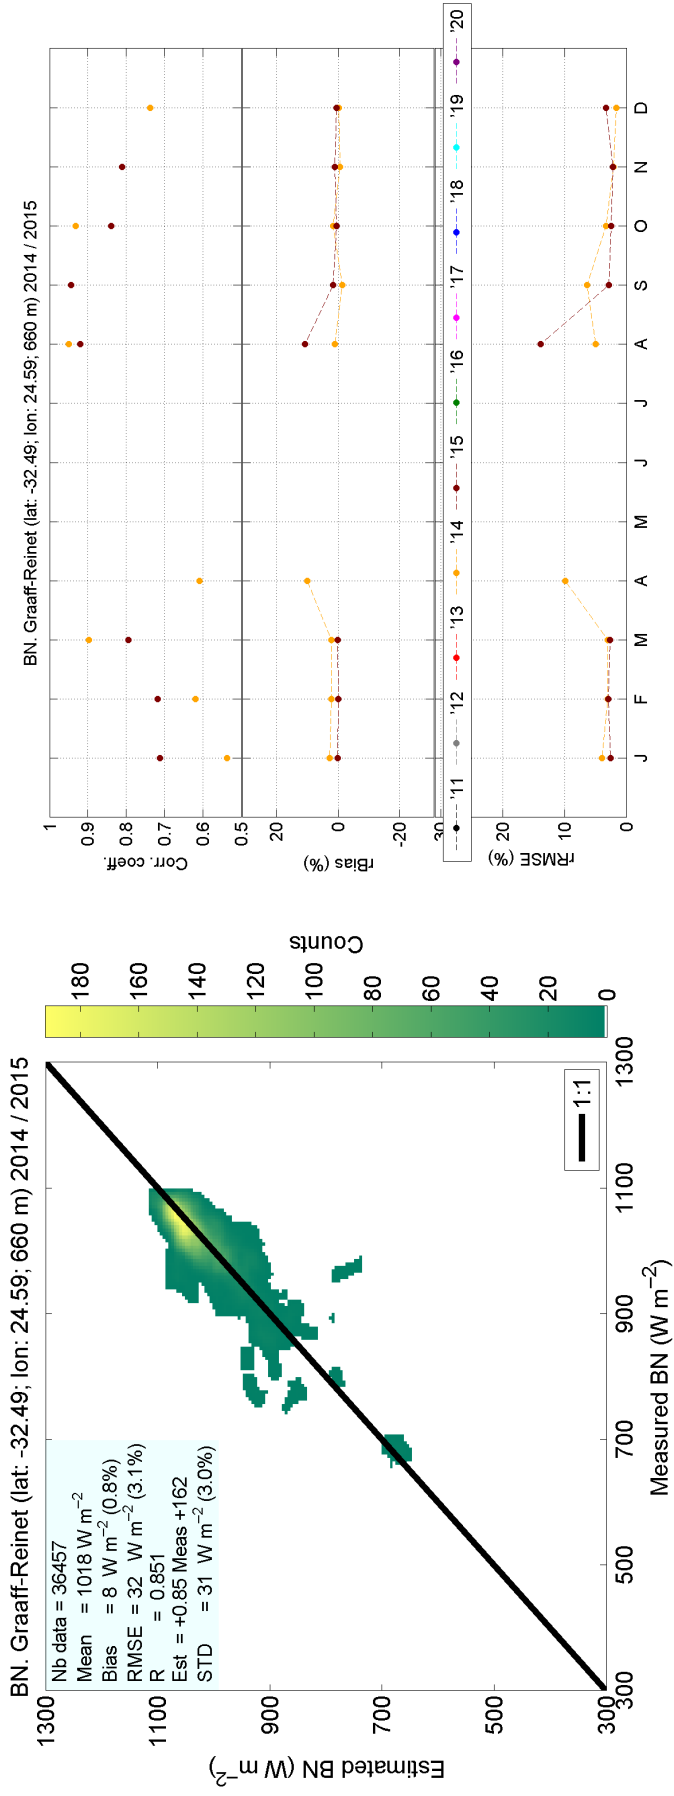

BN. Graaff-Reinet (lat: -32.49; lon: 24.59; 660 m) 2014 / 2015

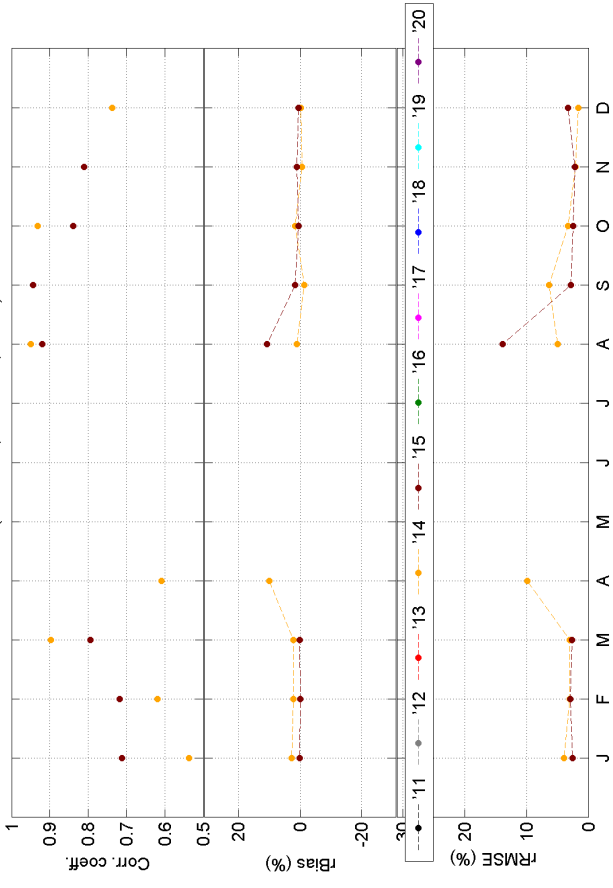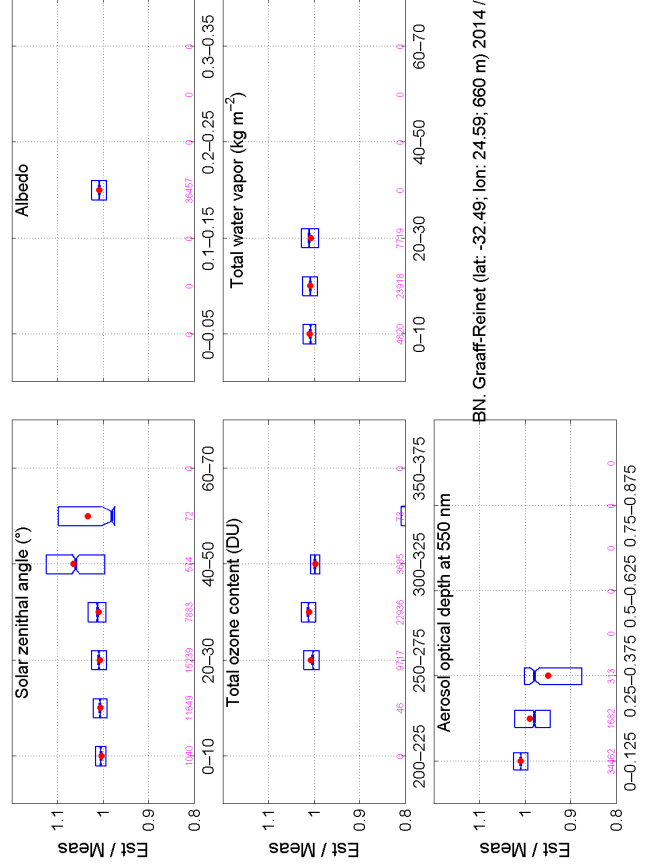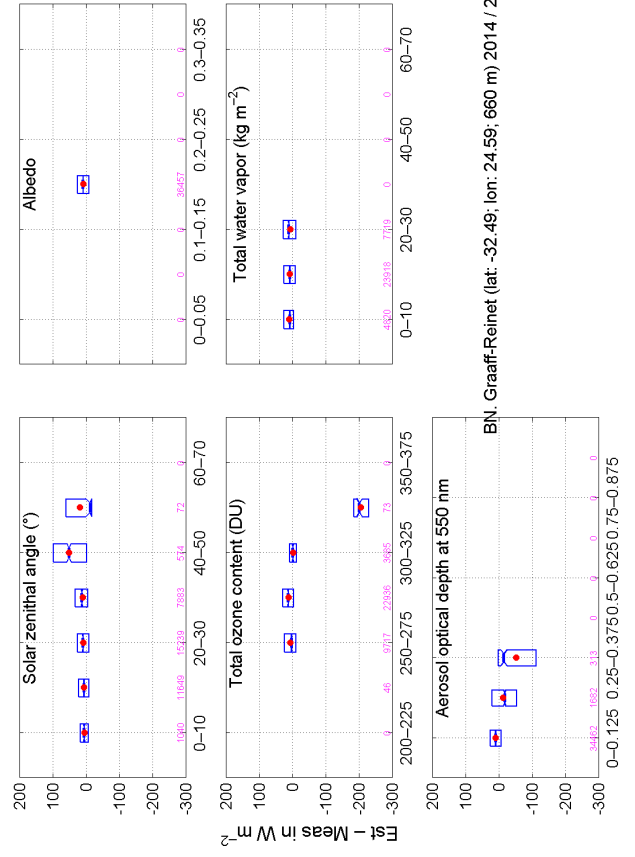

Figure S158: Comparison on direct component at normal irradiance at Graaff-Reinet



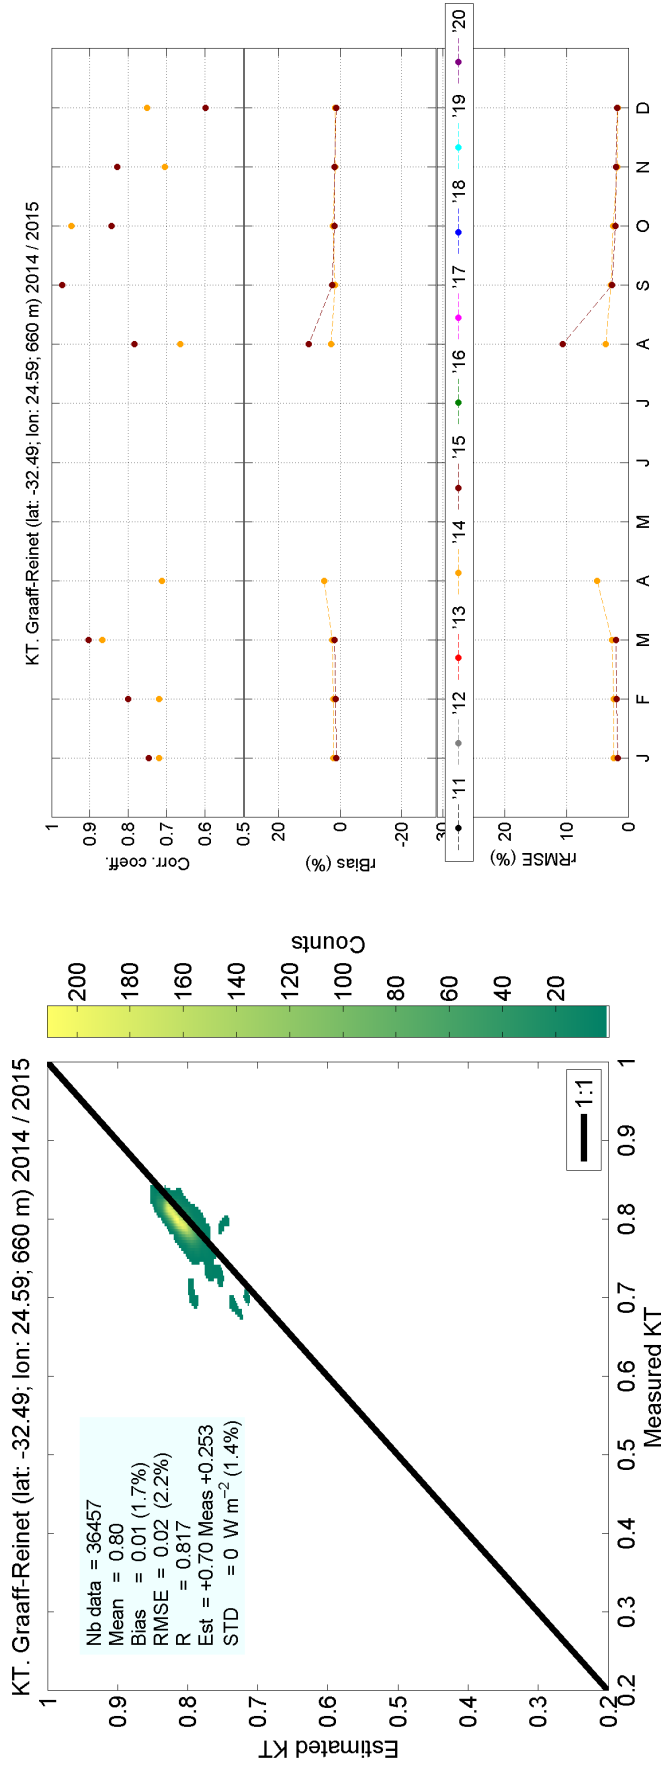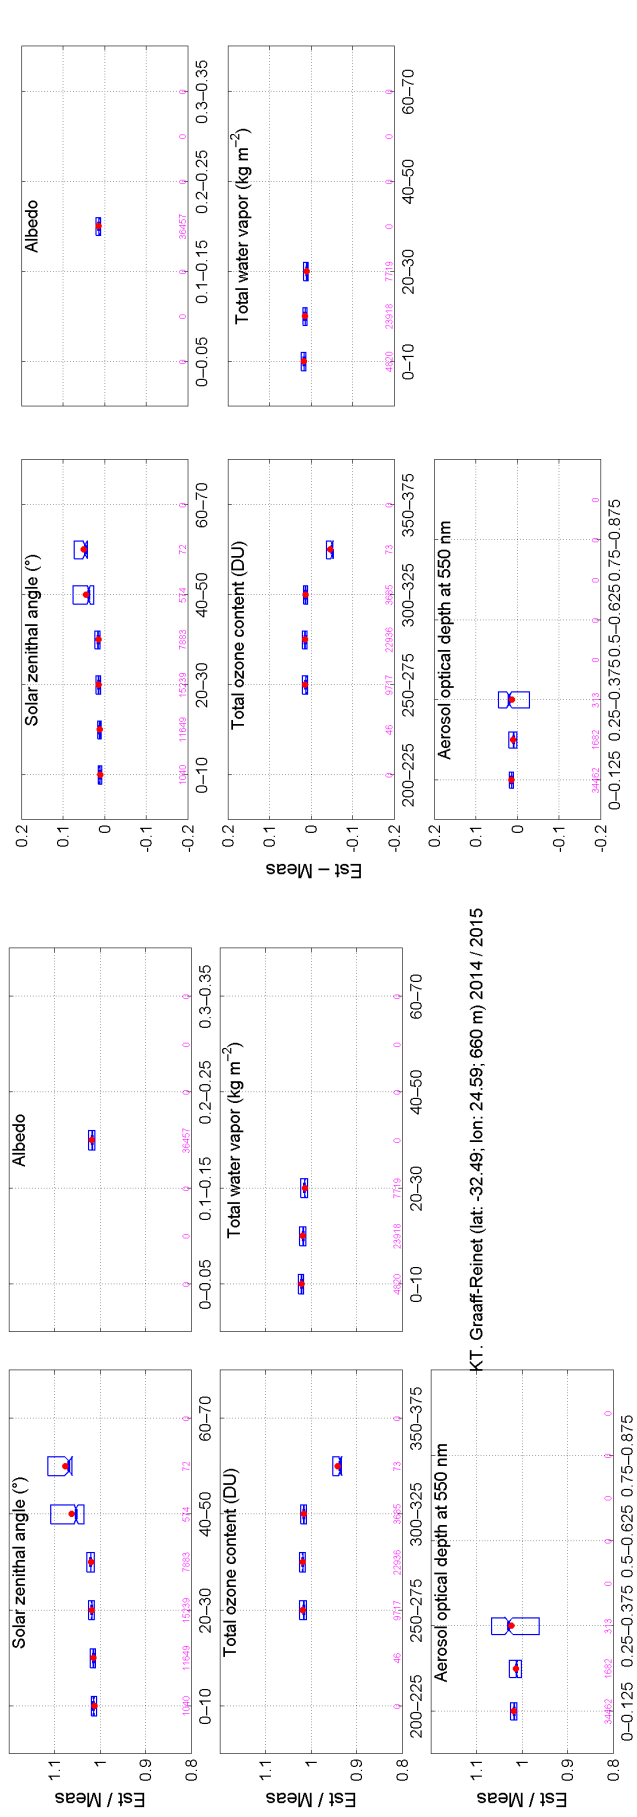

Figure S159: Comparison on clearness index at Graaff-Reinet

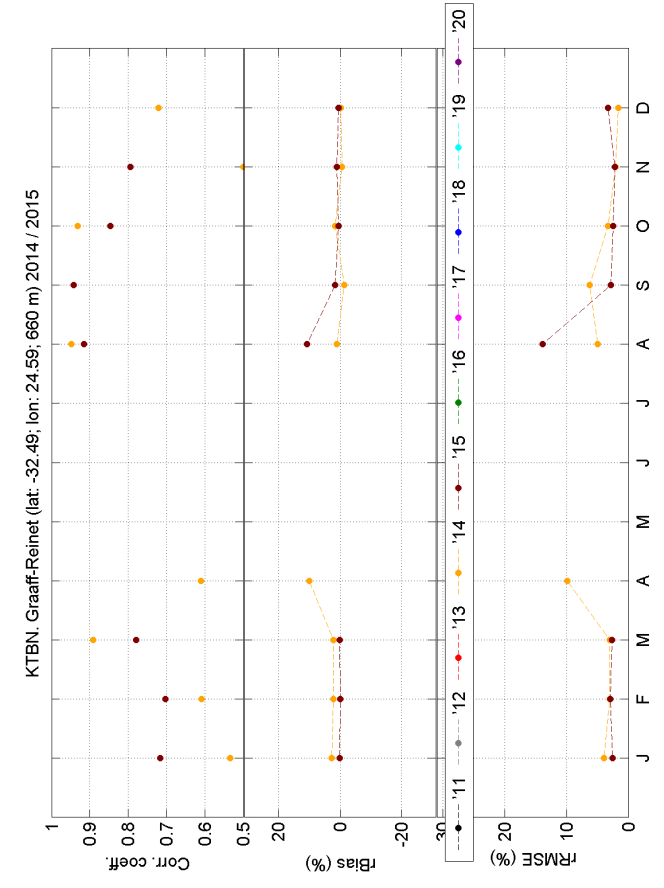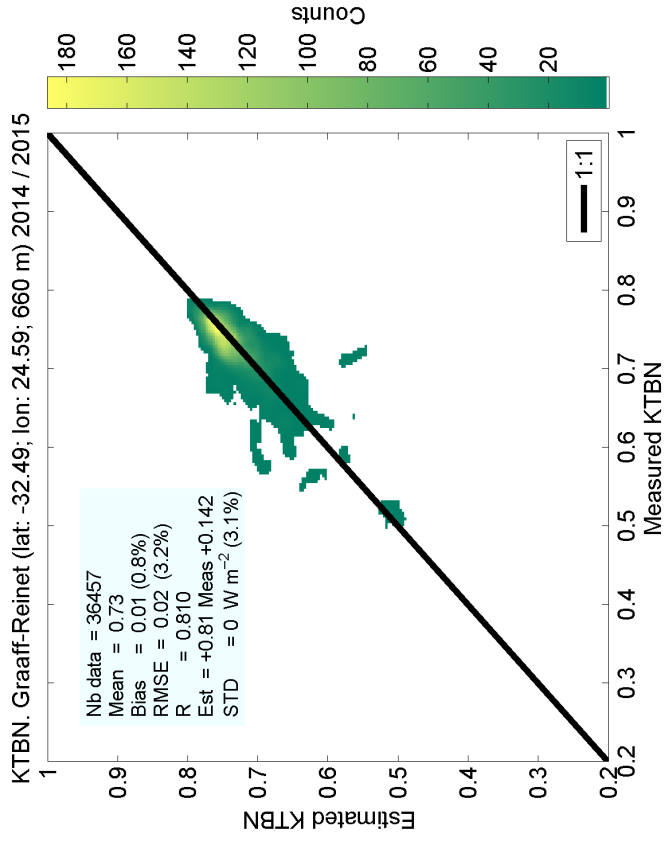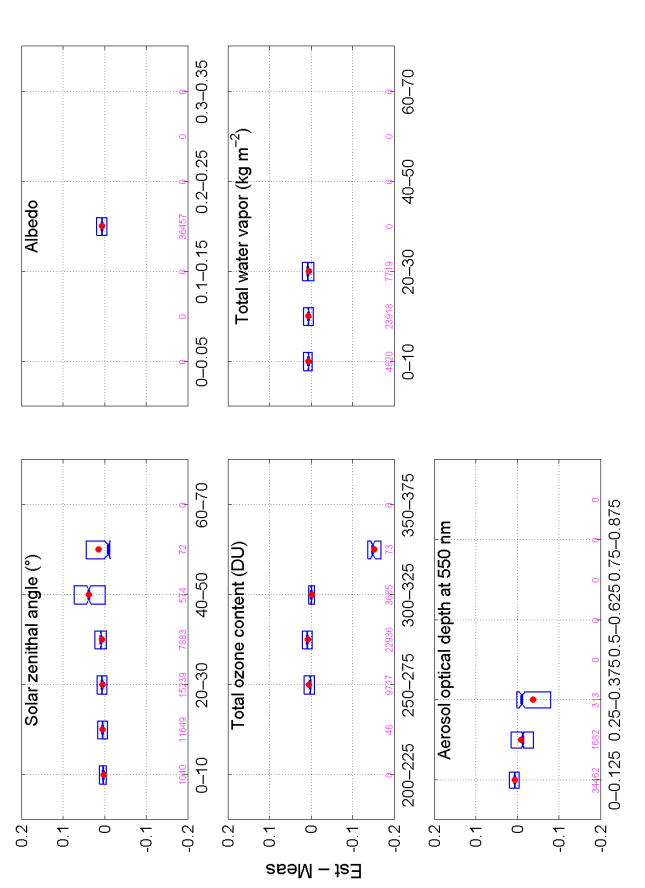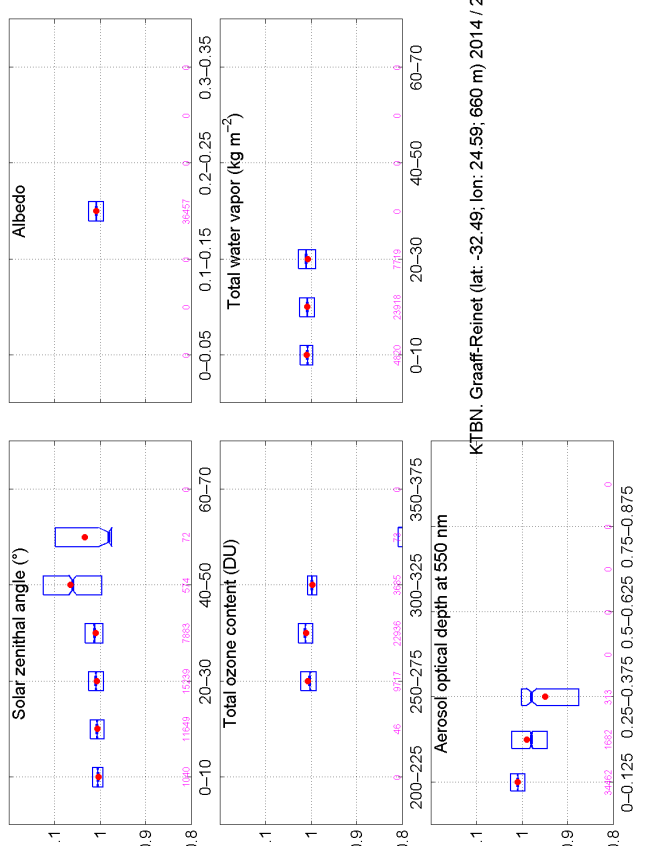

Figure S160: Comparison on direct clearness index at Graaff-Reinet

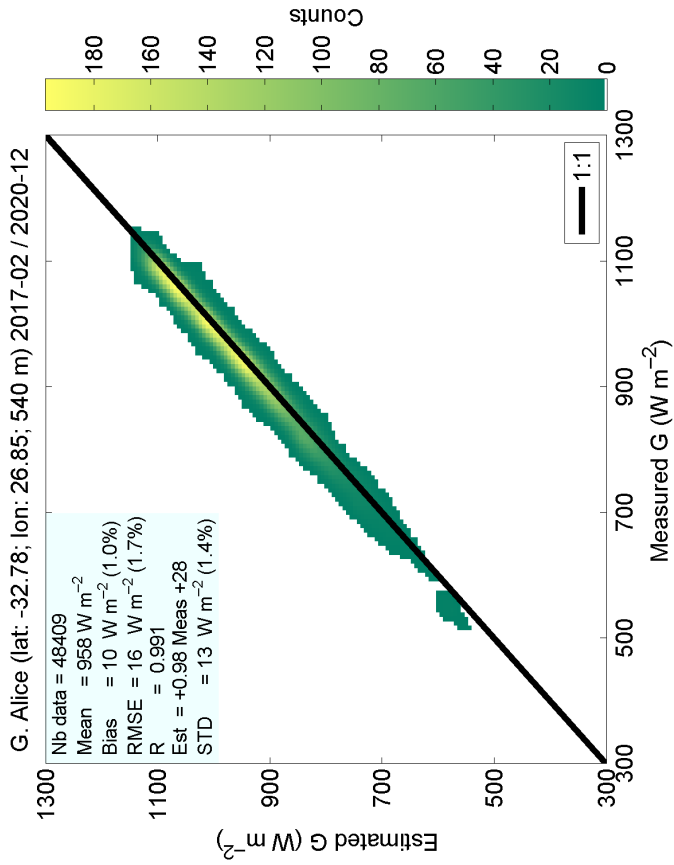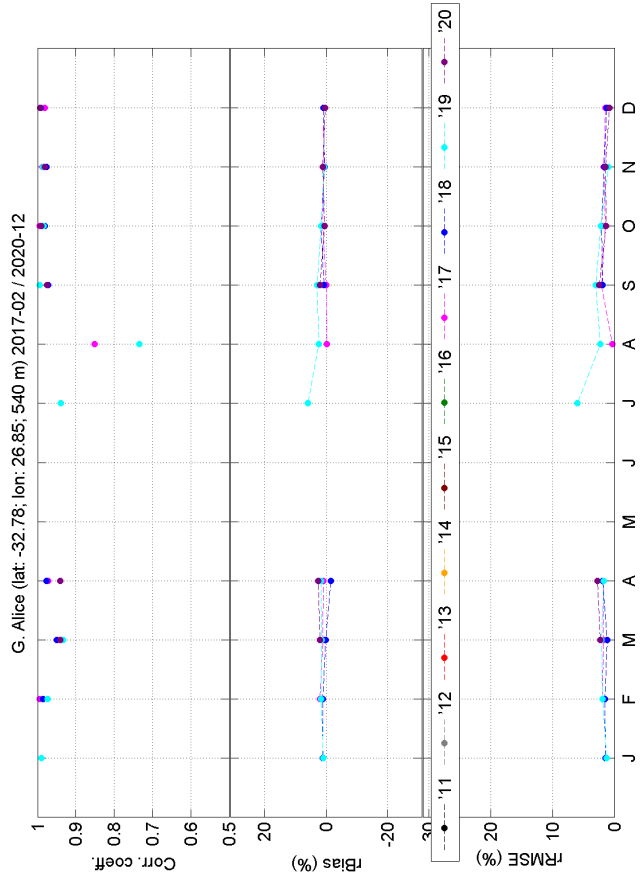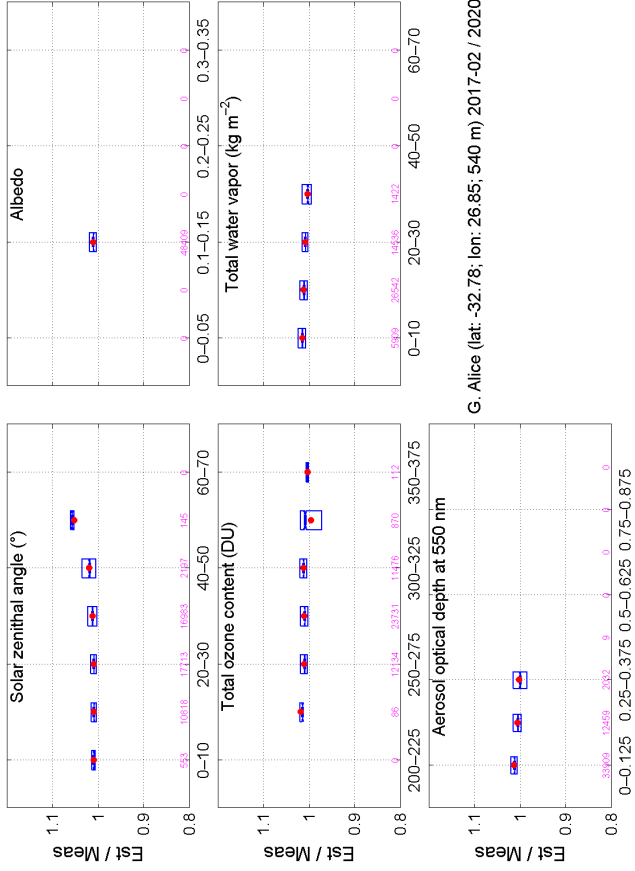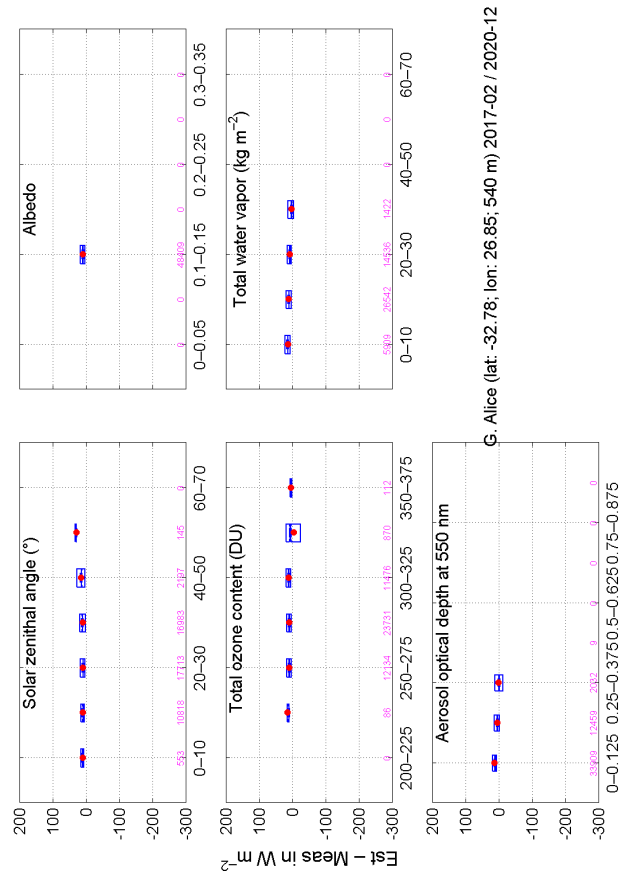

Figure S161: Comparison on global irradiance at Alice

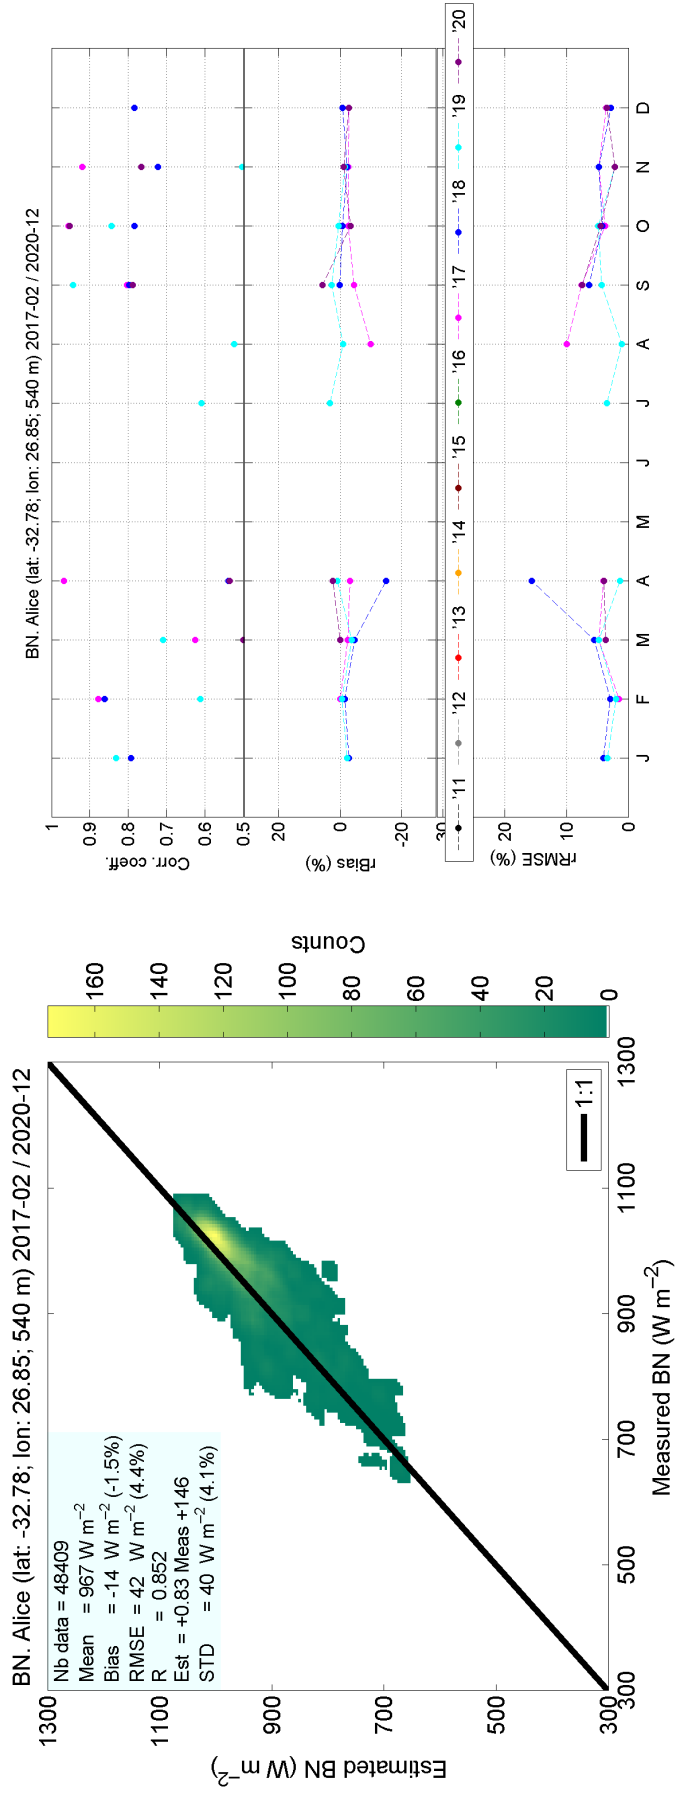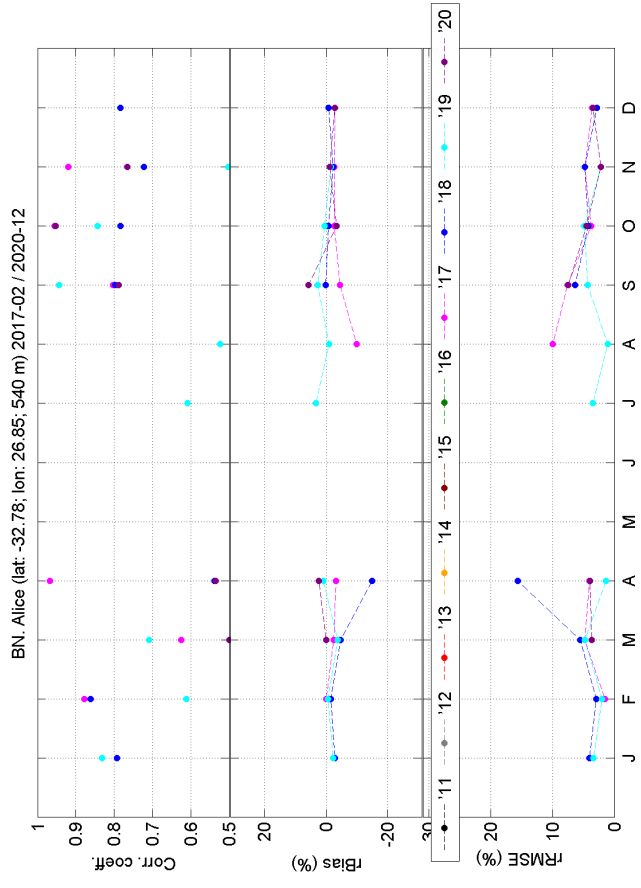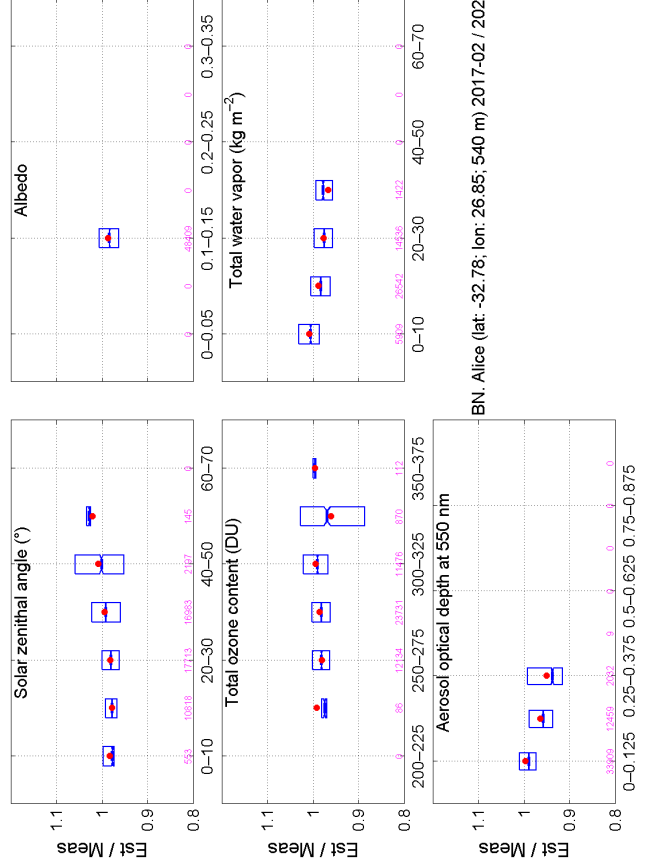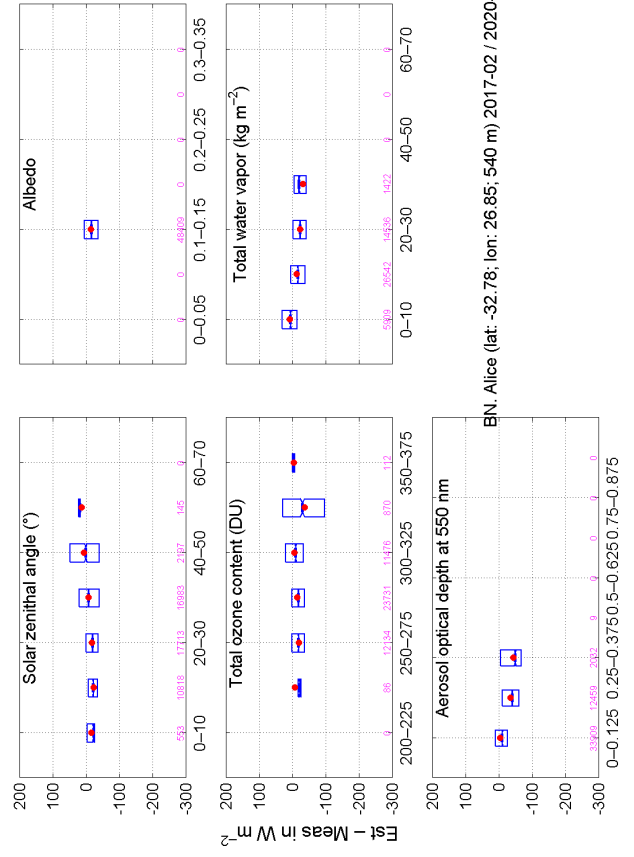

Figure S162: Comparison on direct component at normal irradiance at Alice

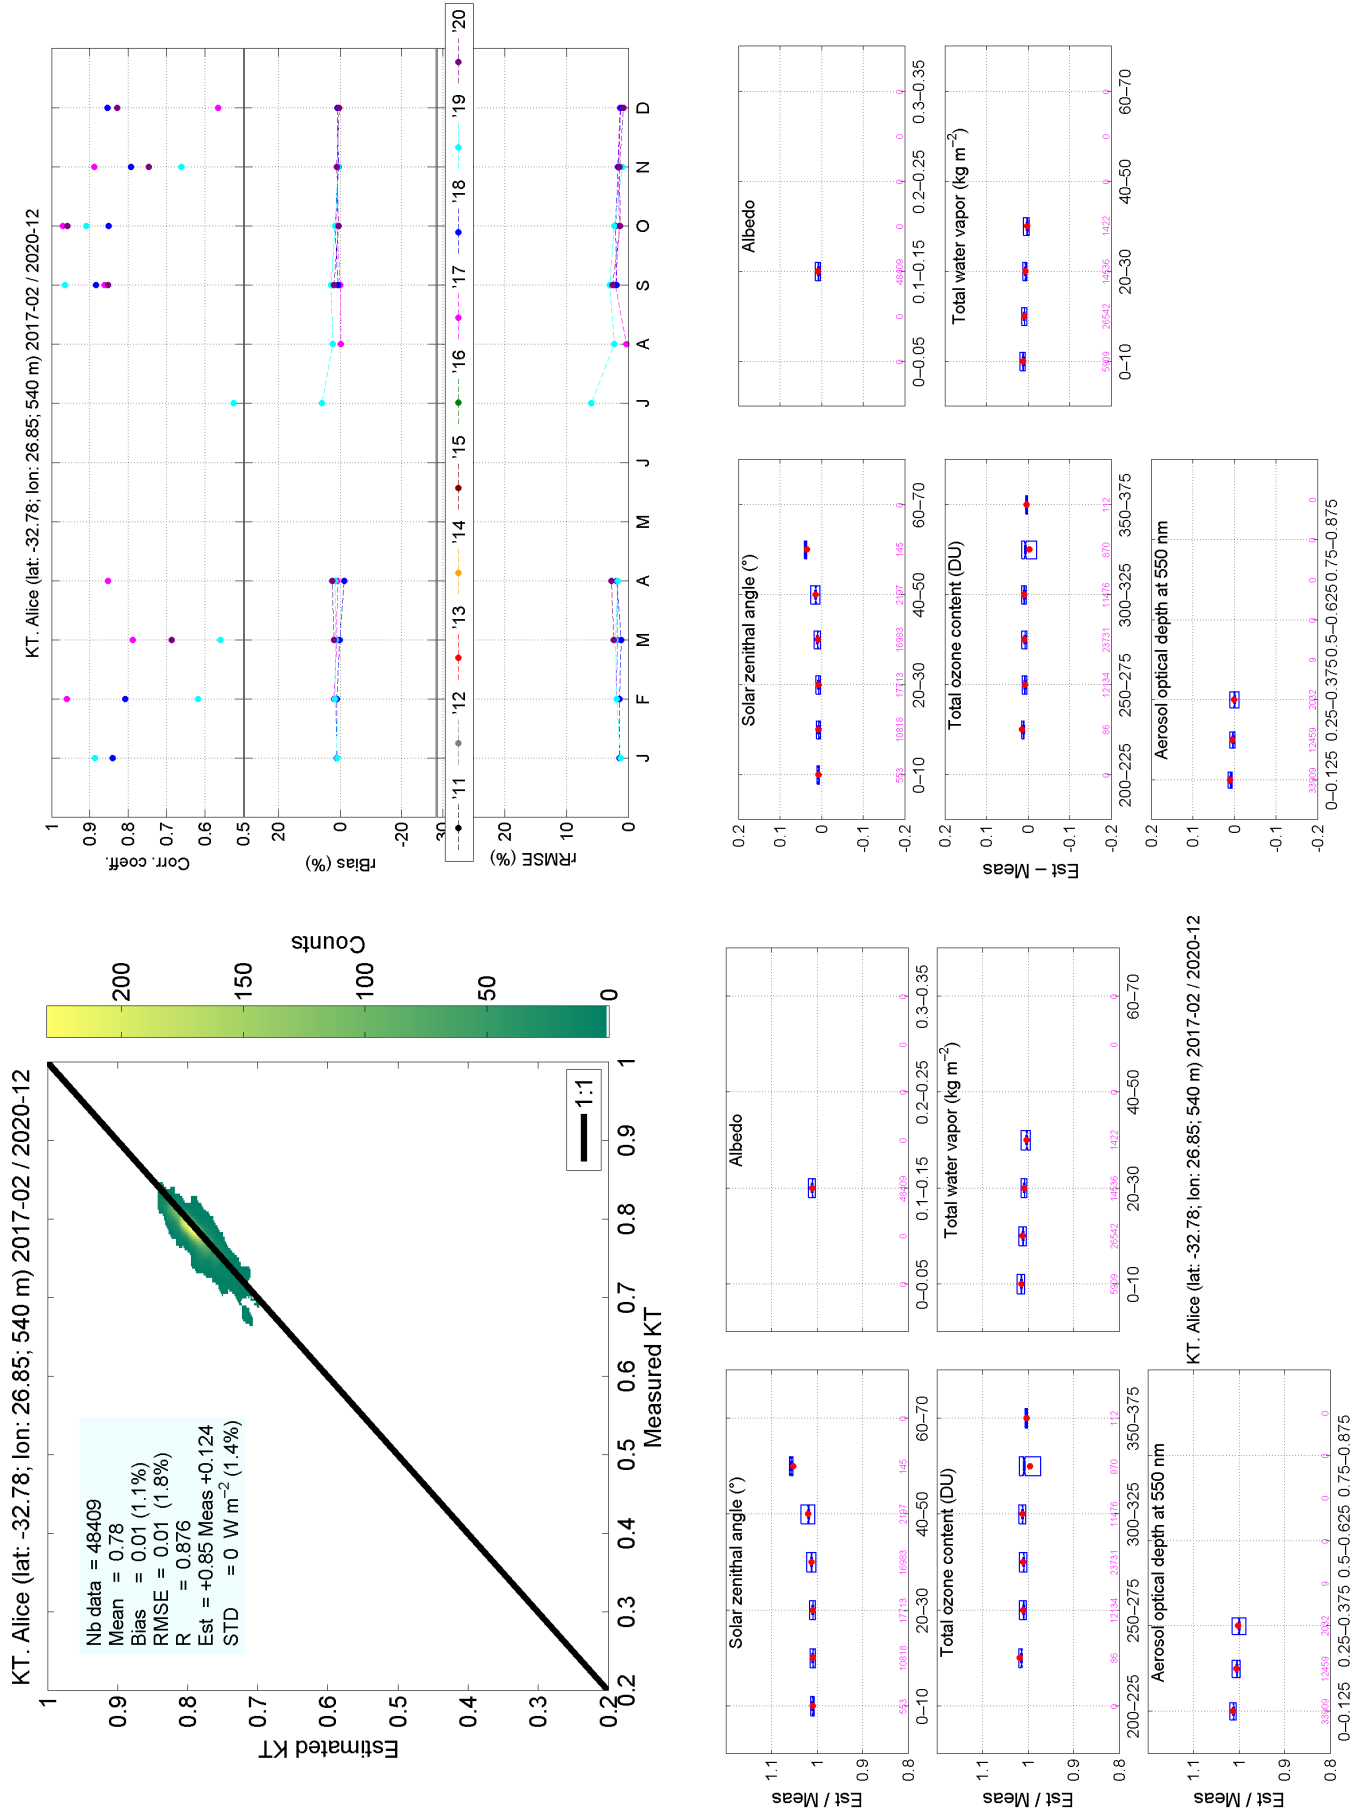

Figure S163: Comparison on clearness index at Alice

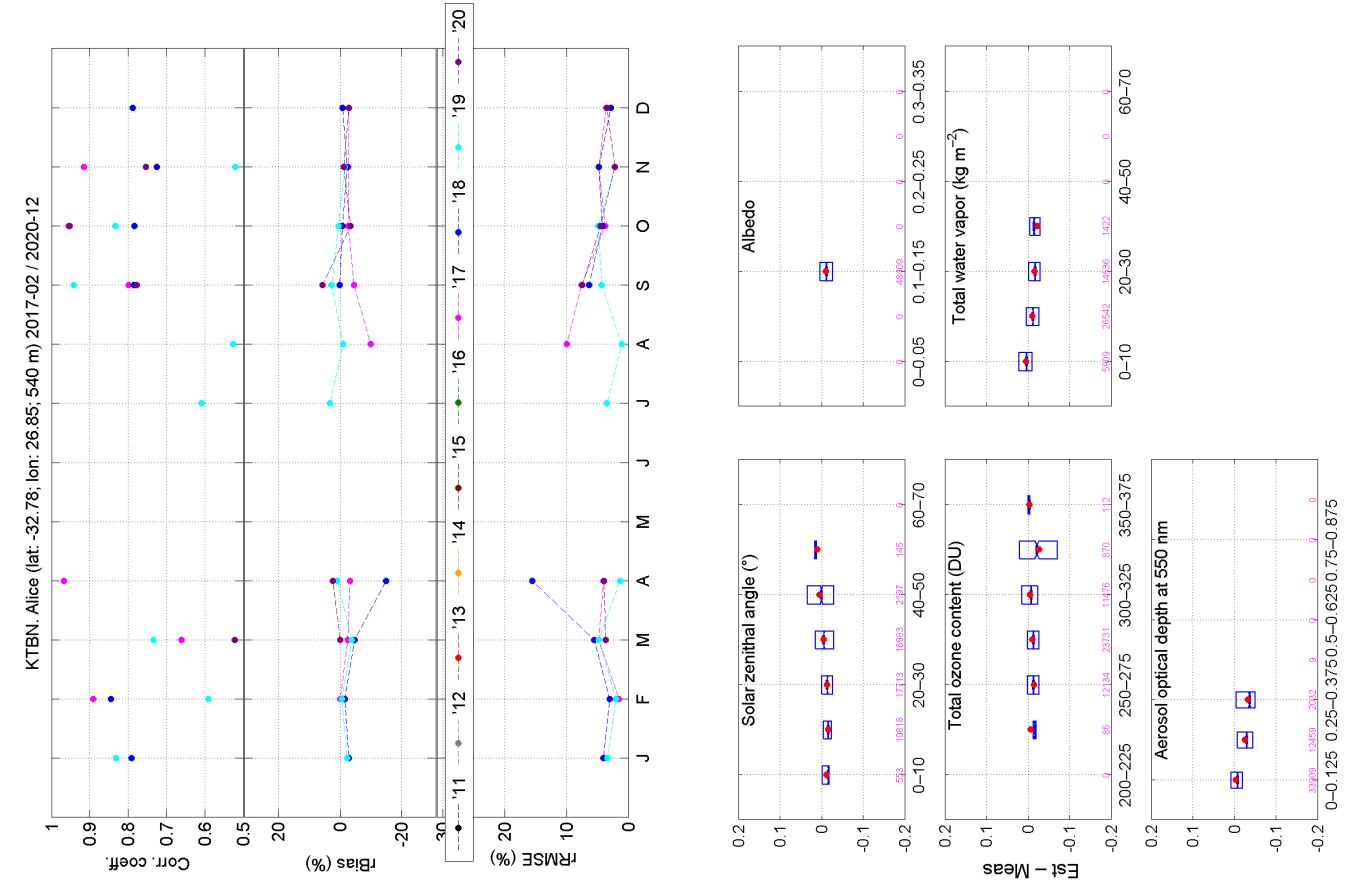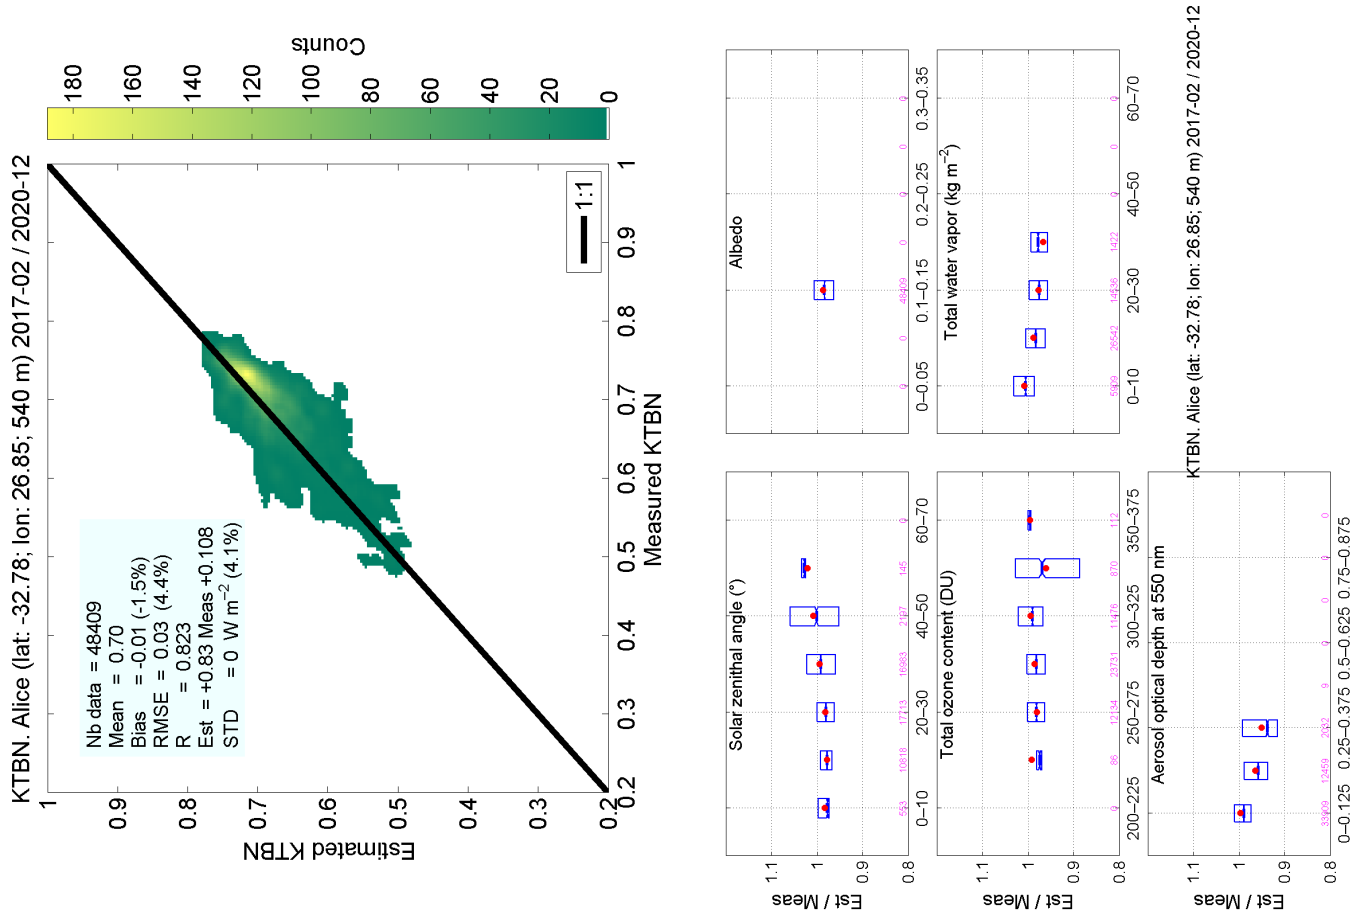

Figure S164: Comparison on direct clearness index at Alice

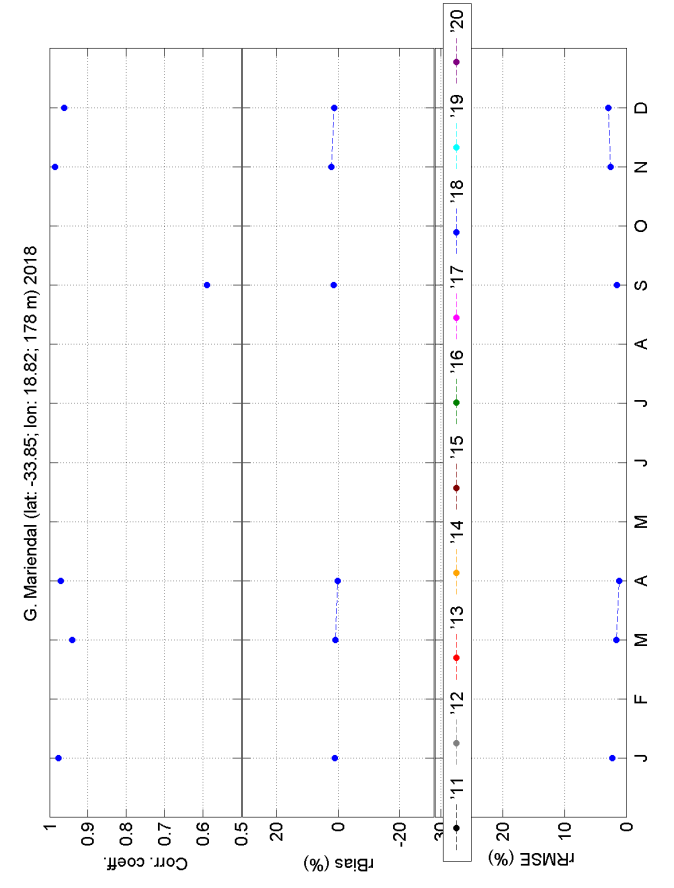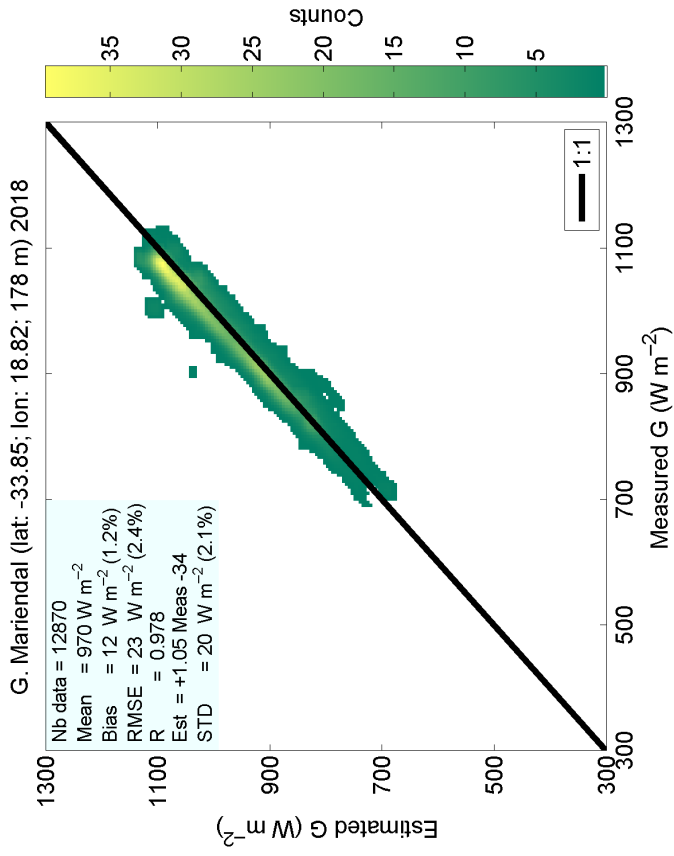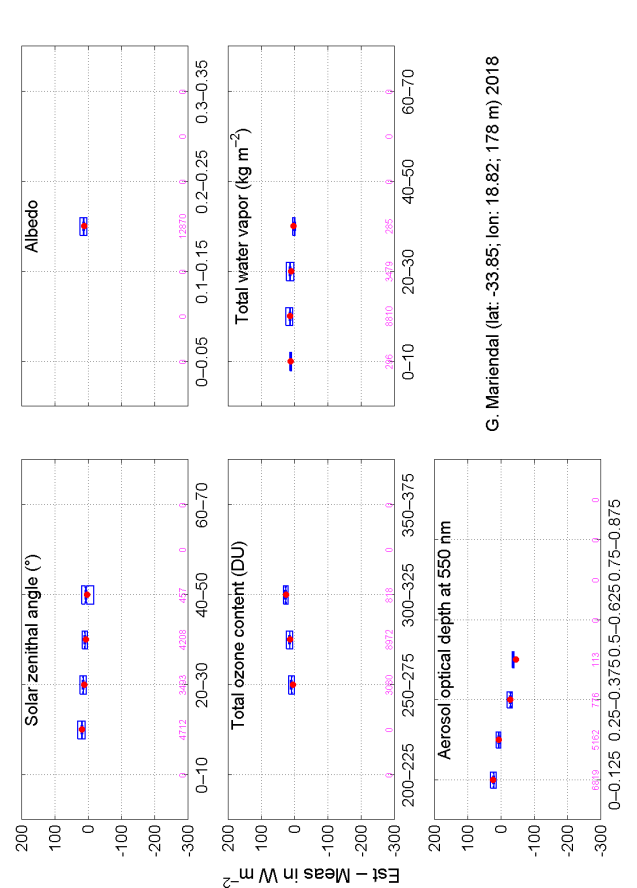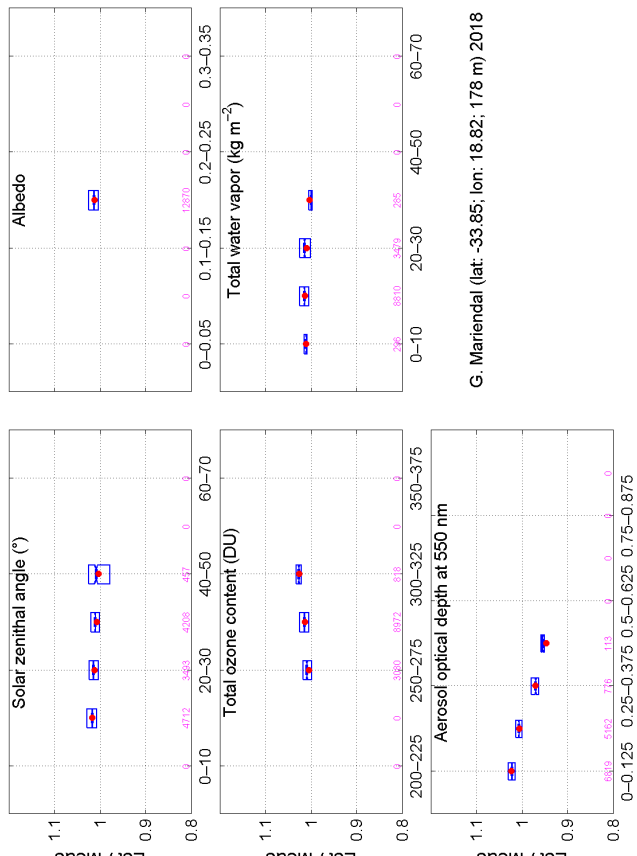

Figure S165: Comparison on global irradiance at Mariendal

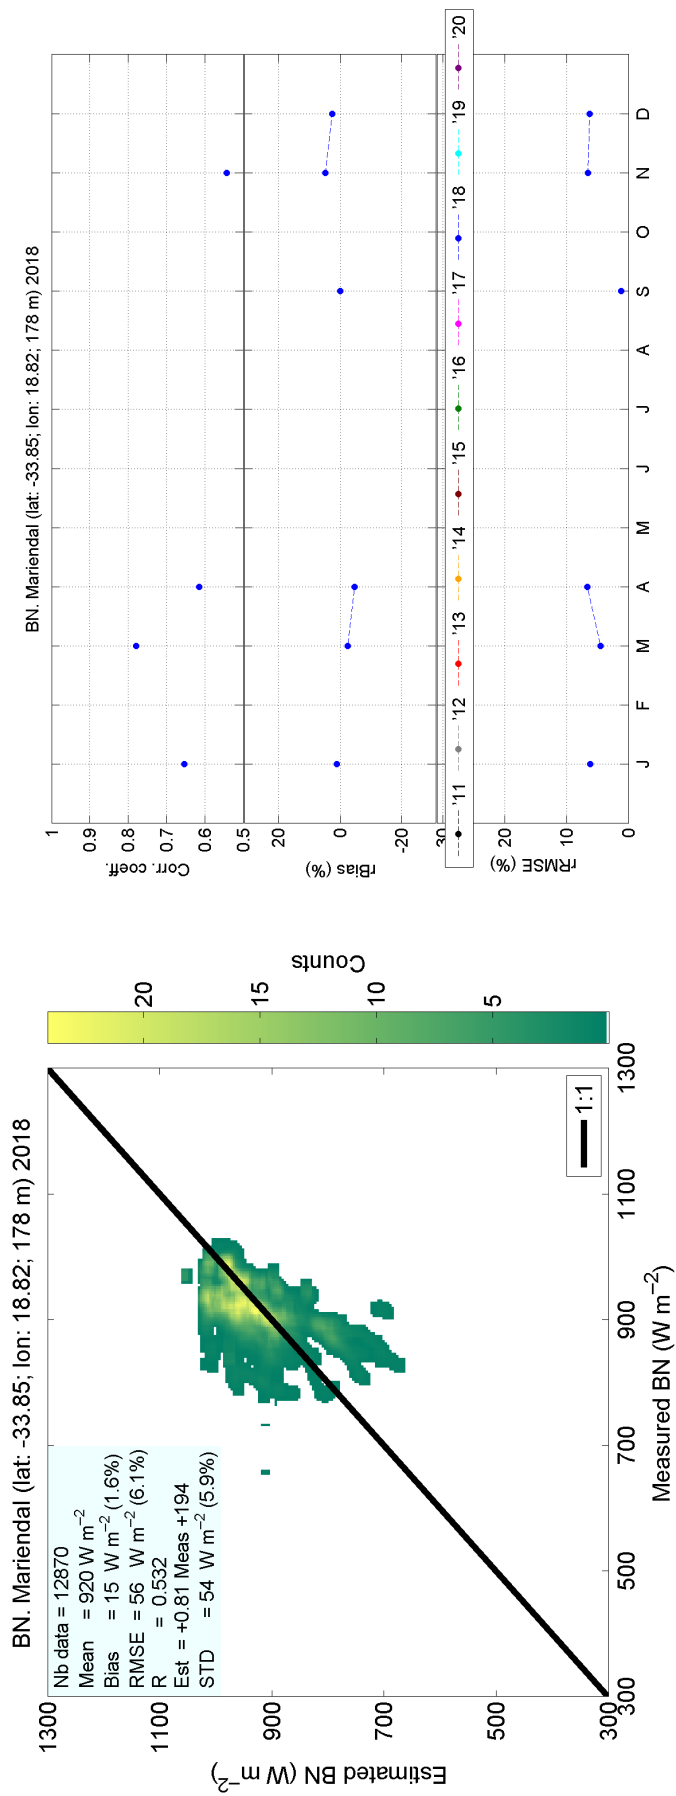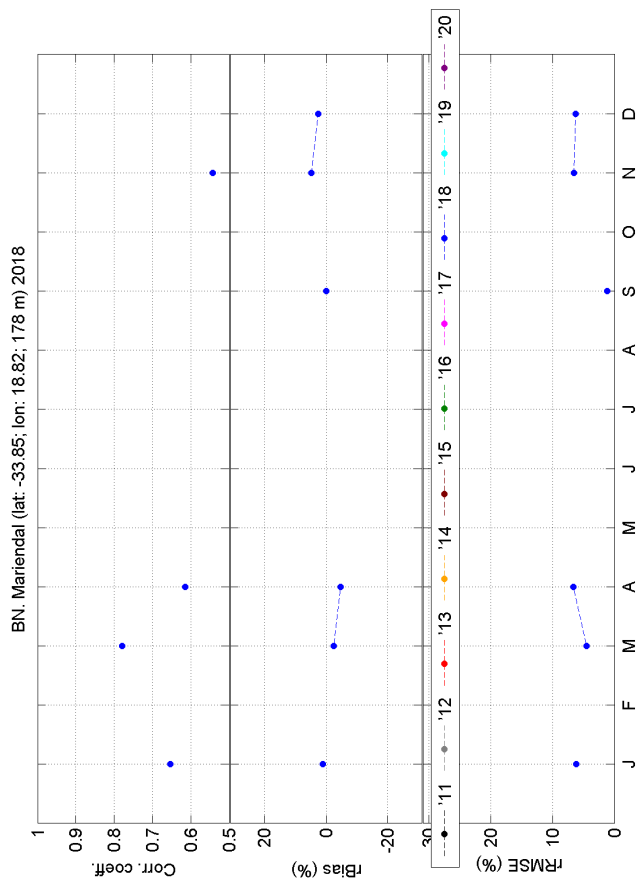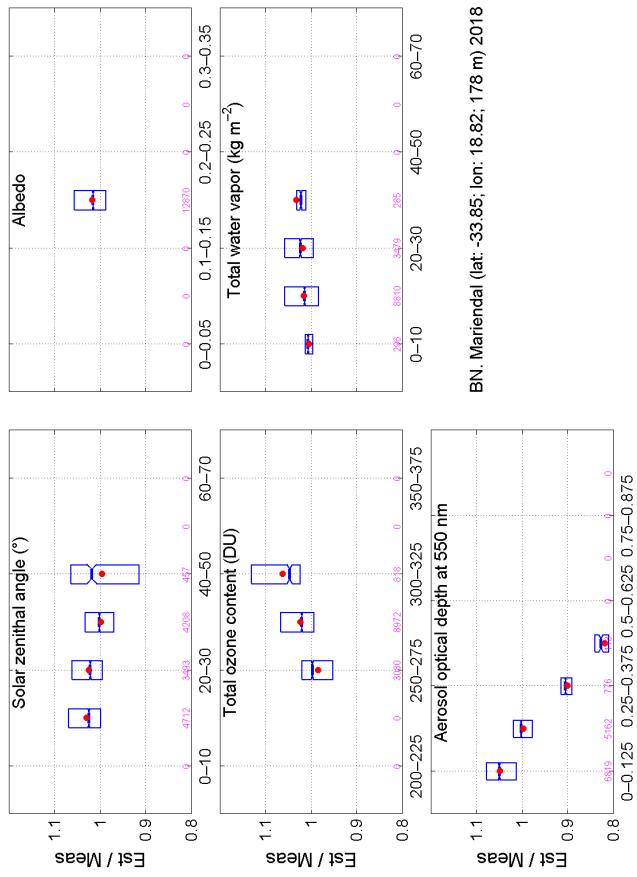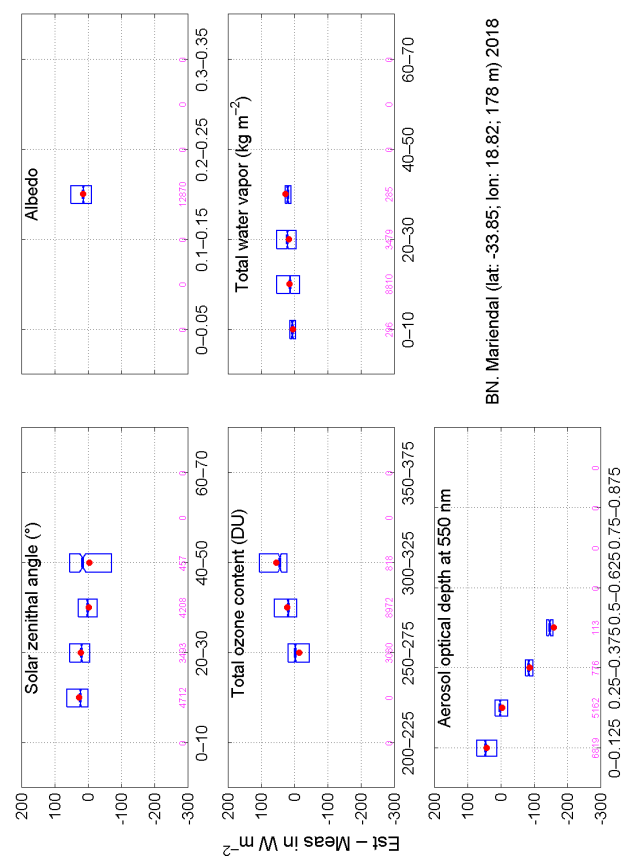

Figure S166: Comparison on direct component at Mariendal



KT. Mariendal (lat: -33.85; lon: 18.82; 178 m) 2018

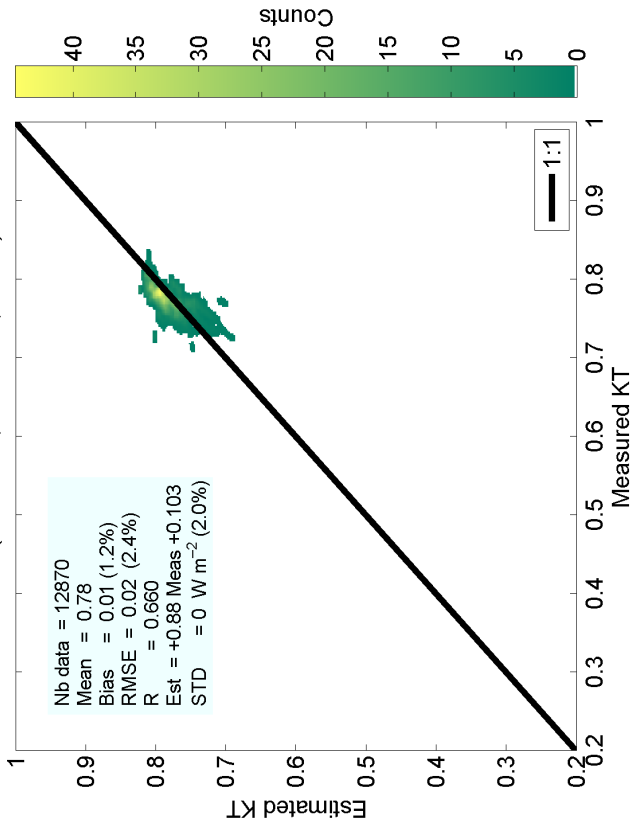

KT. Mariendal (lat: -33.85; lon: 18.82; 178 m) 2018

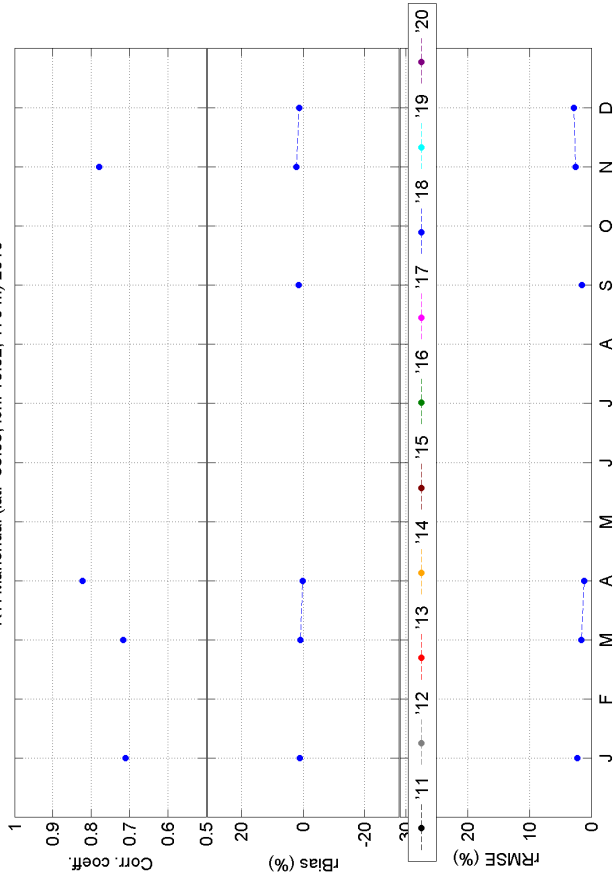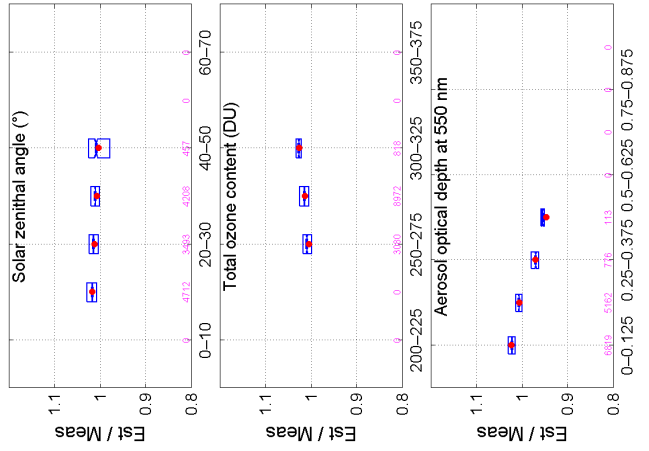

KT. Mariendal (lat: -33.85; lon: 18.82; 178 m) 2018

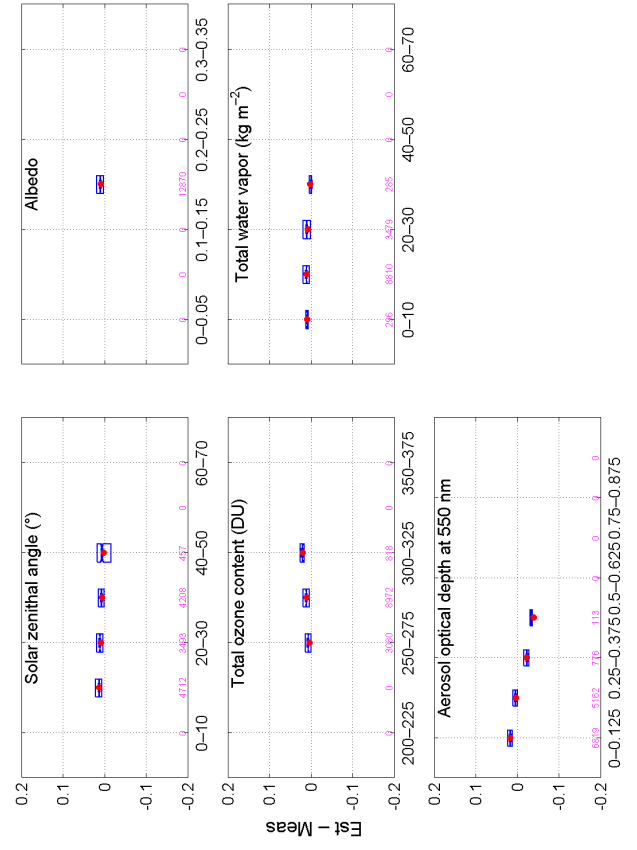

KTBN, Mariendal (lat: -33.85; lon: 18.82; 178 m) 2018

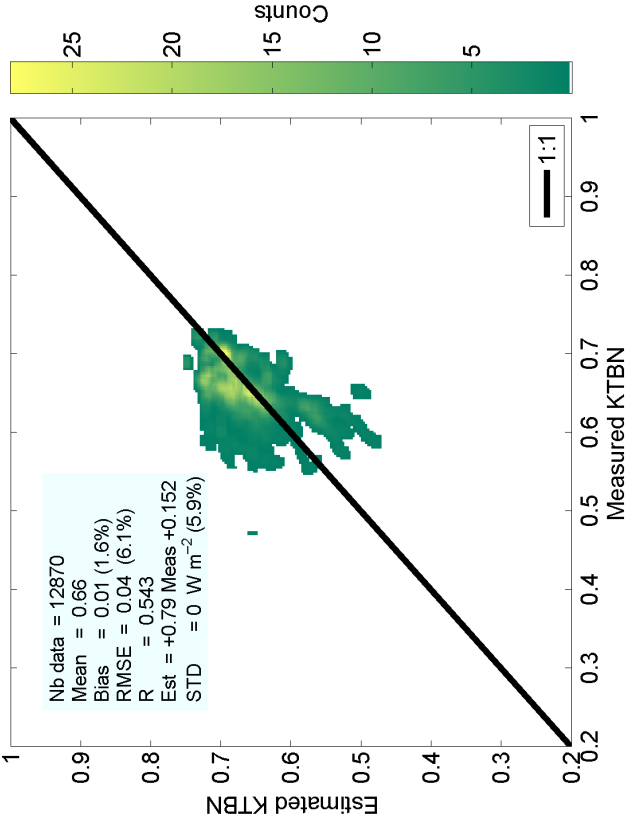

KTBN, Mariendal (lat: -33.85; lon: 18.82; 178 m) 2018

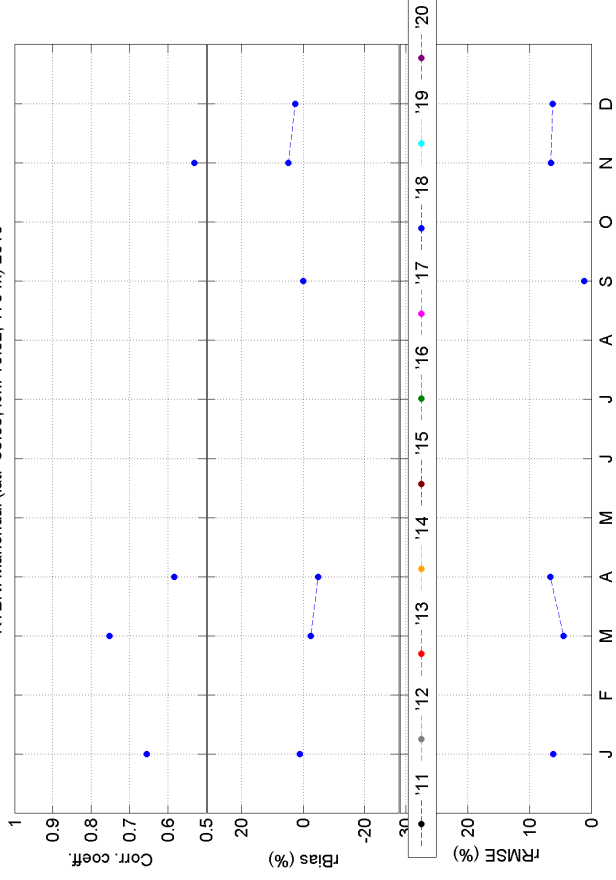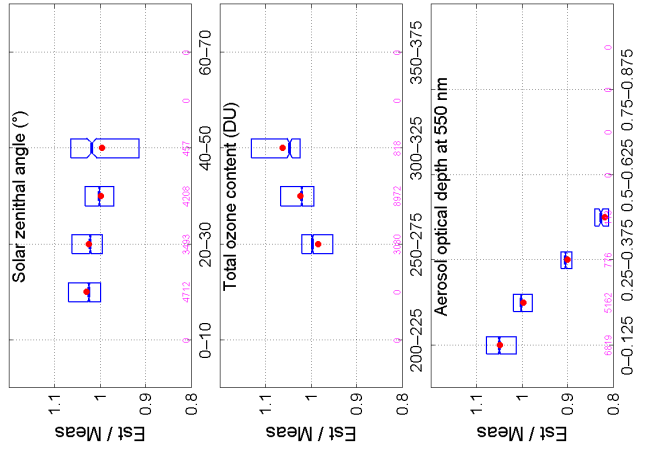

KTBN, Mariendal (lat: -33.85; lon: 18.82; 178 m) 2018

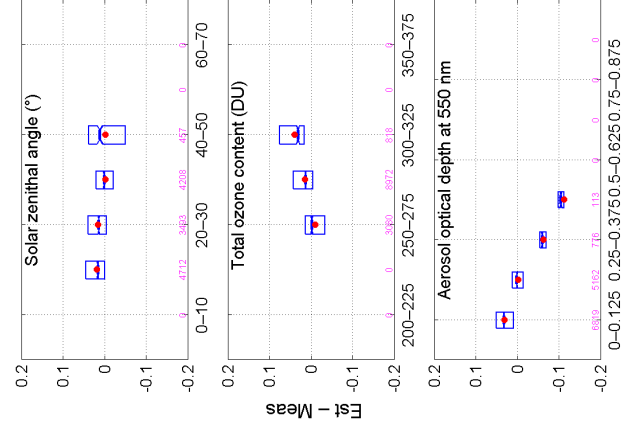

Figure S168: Comparison on direct clearness index at Mariendal

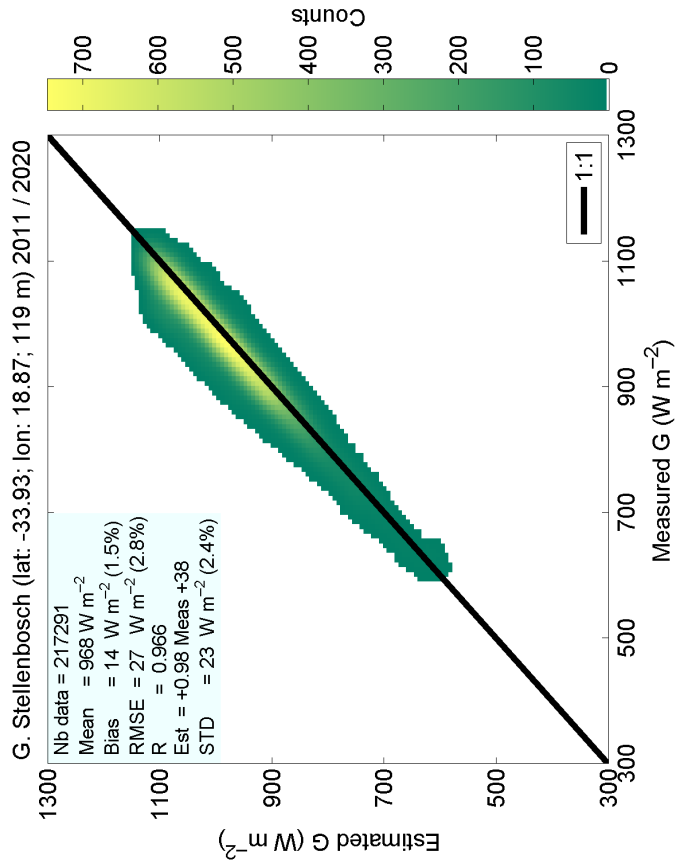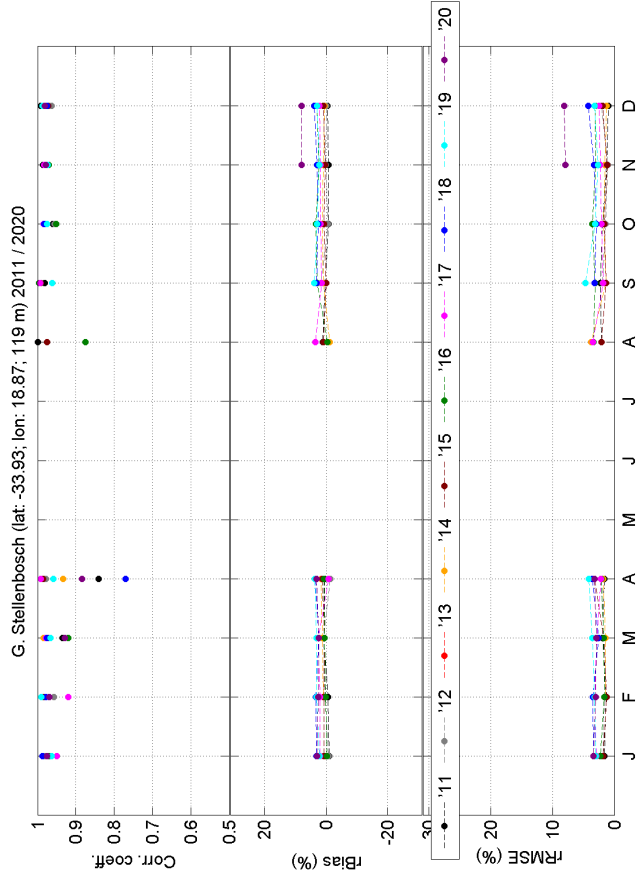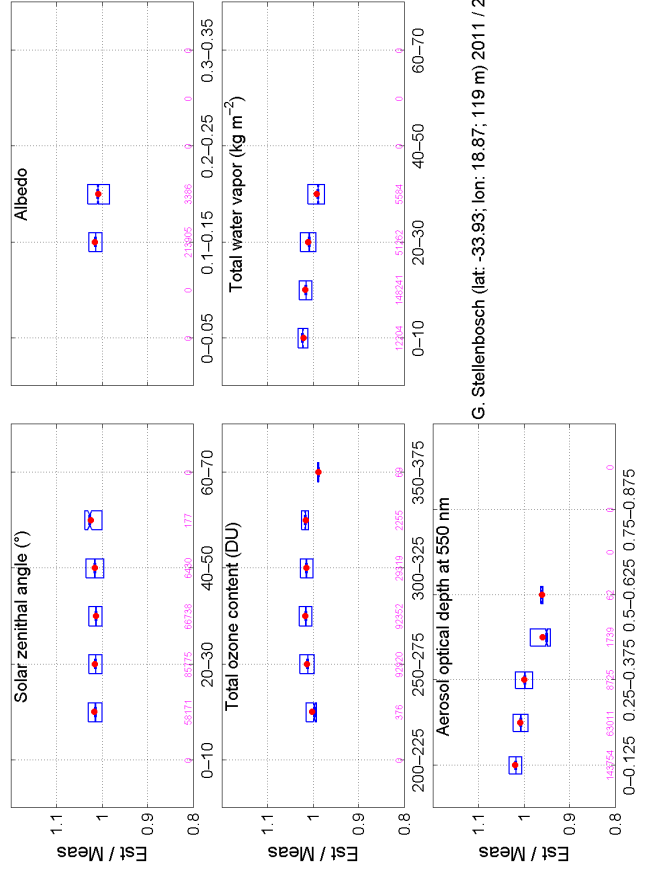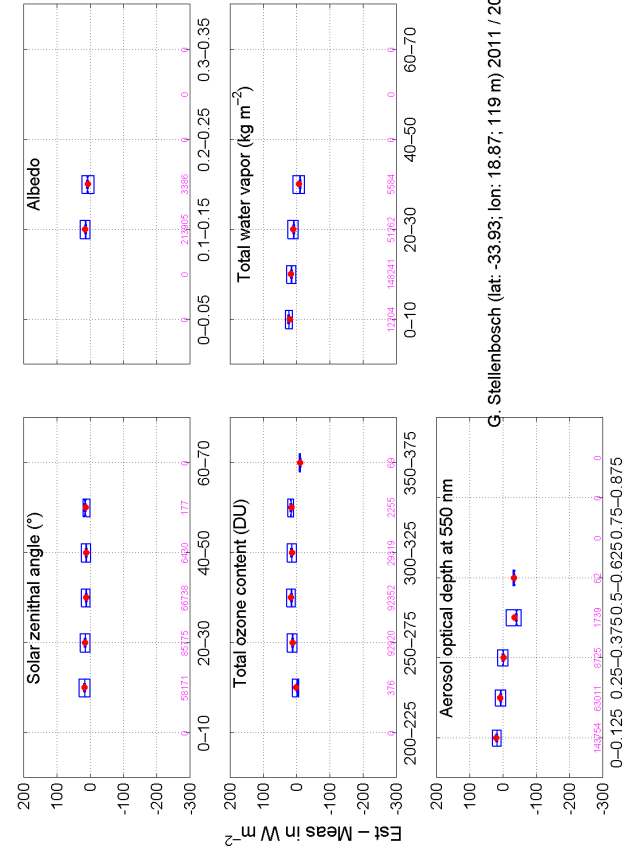

Figure S169: Comparison on global irradiance at Stellenbosch

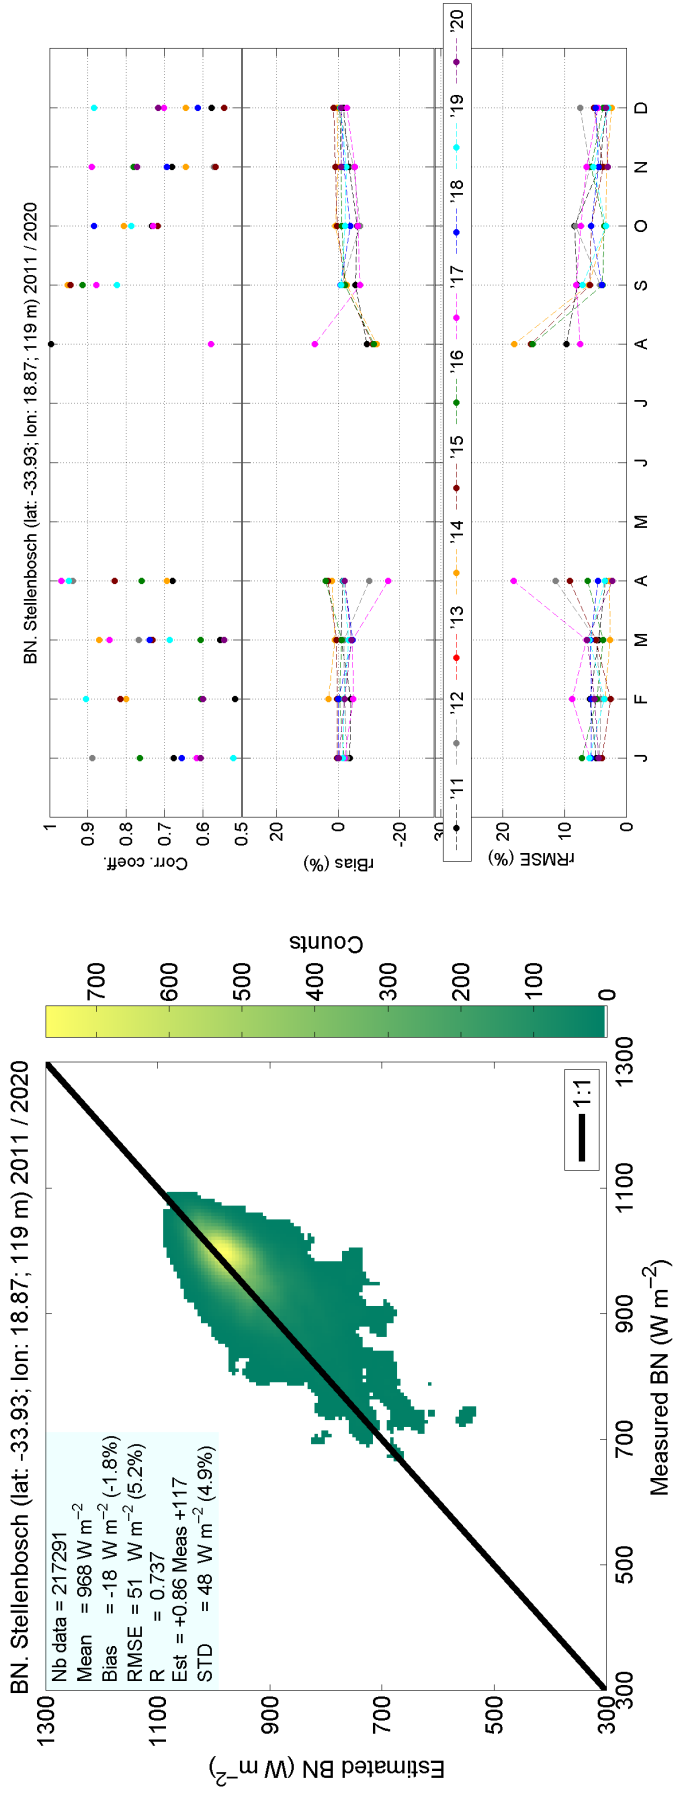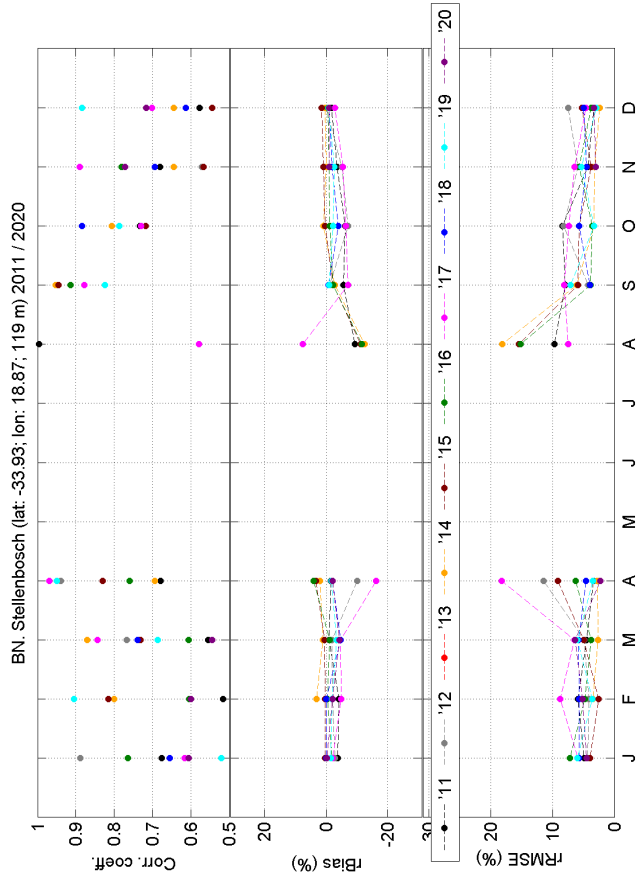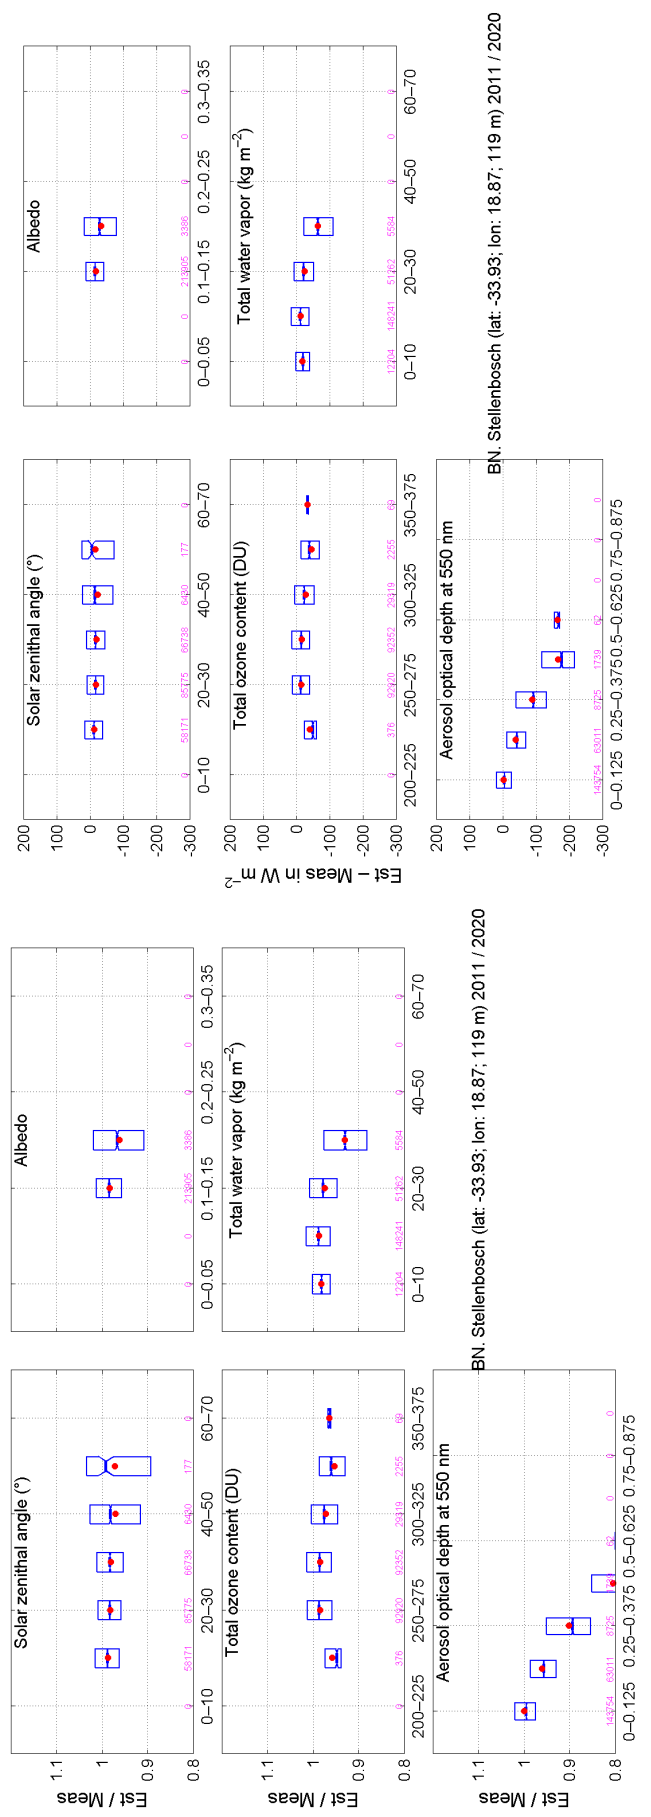

Figure S170: Comparison on direct component at Stellenbosch

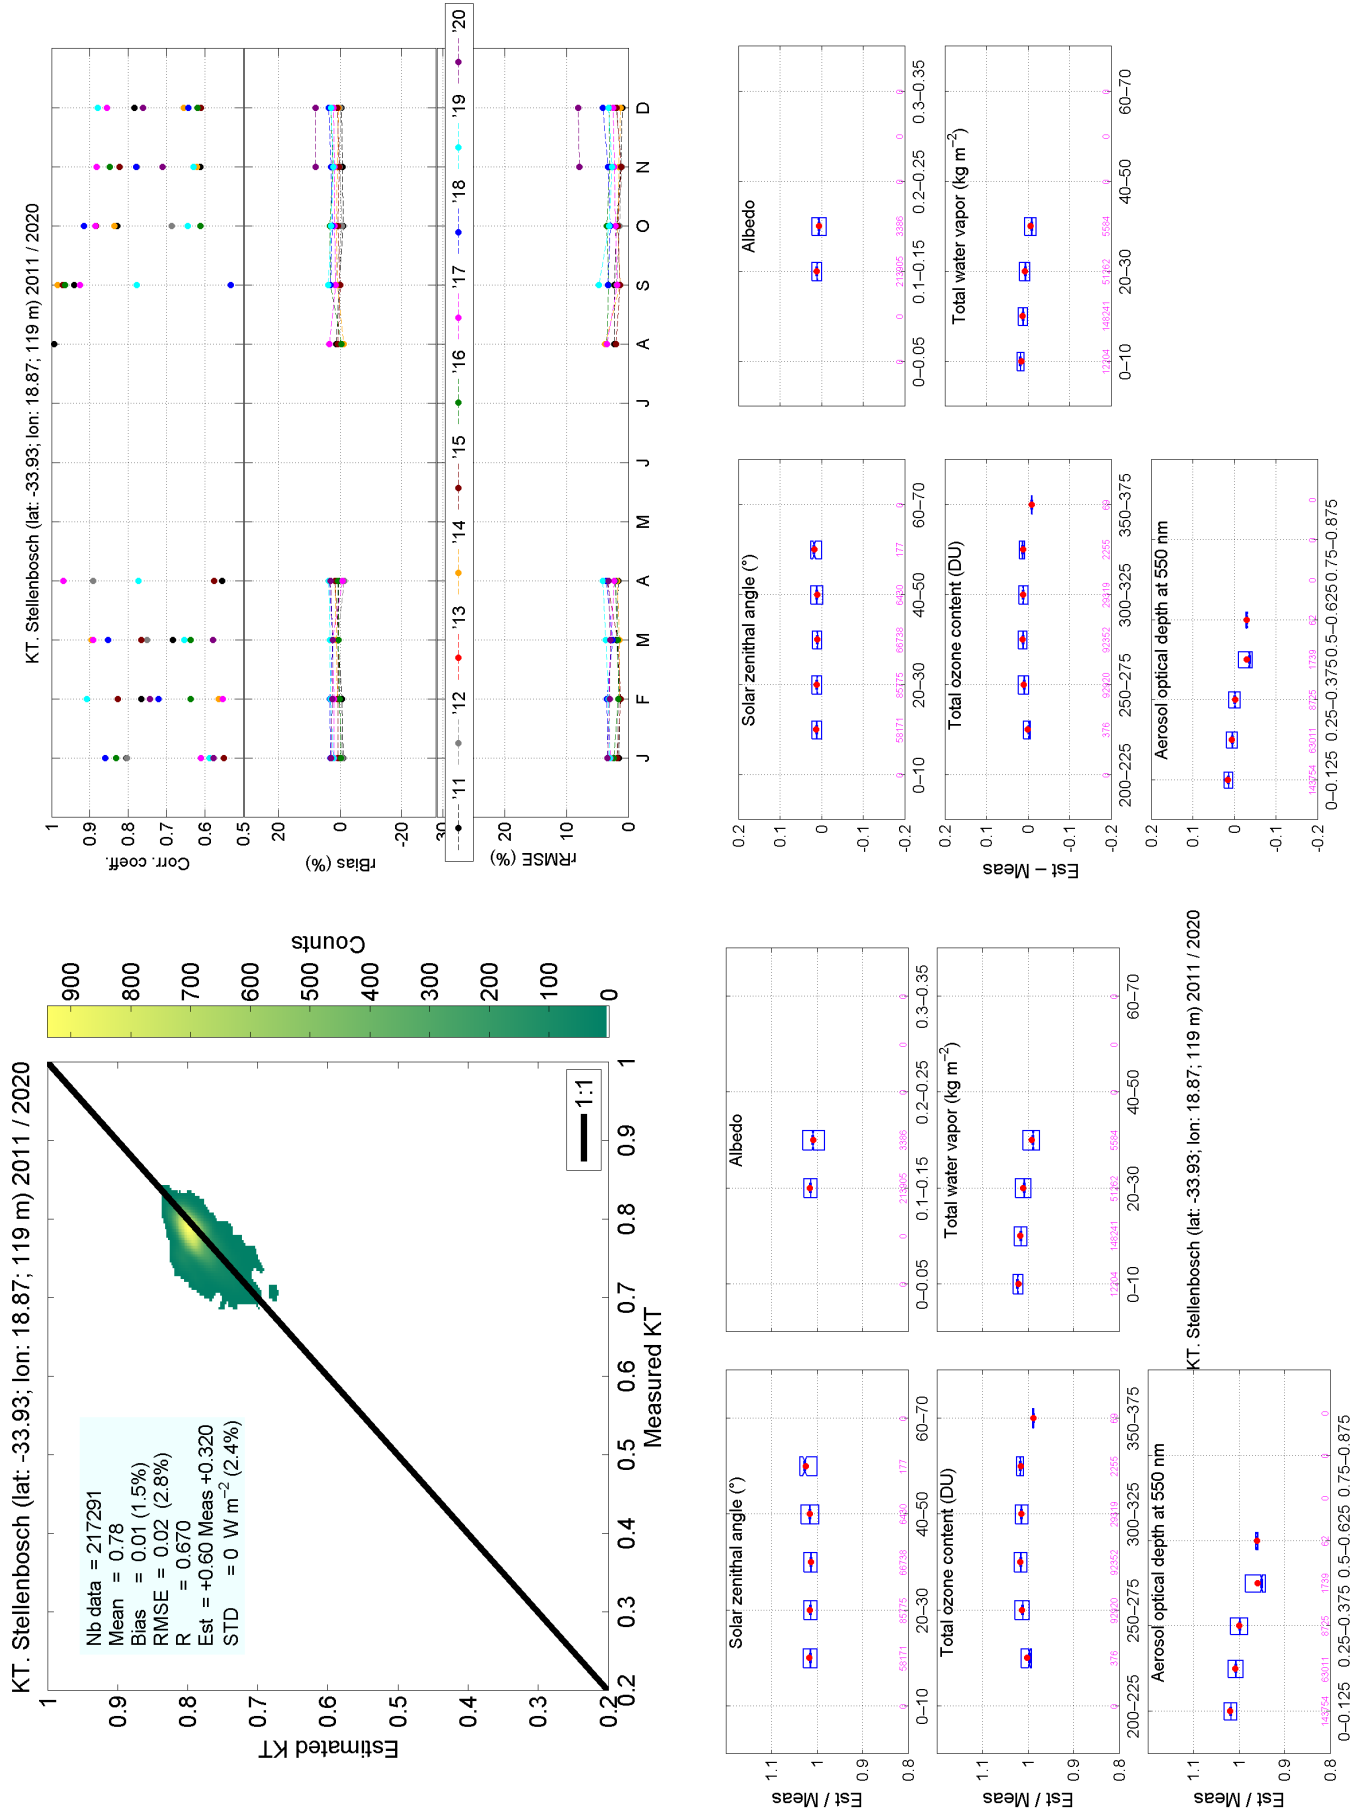

Figure S171: Comparison on clearness index at Stellenbosch

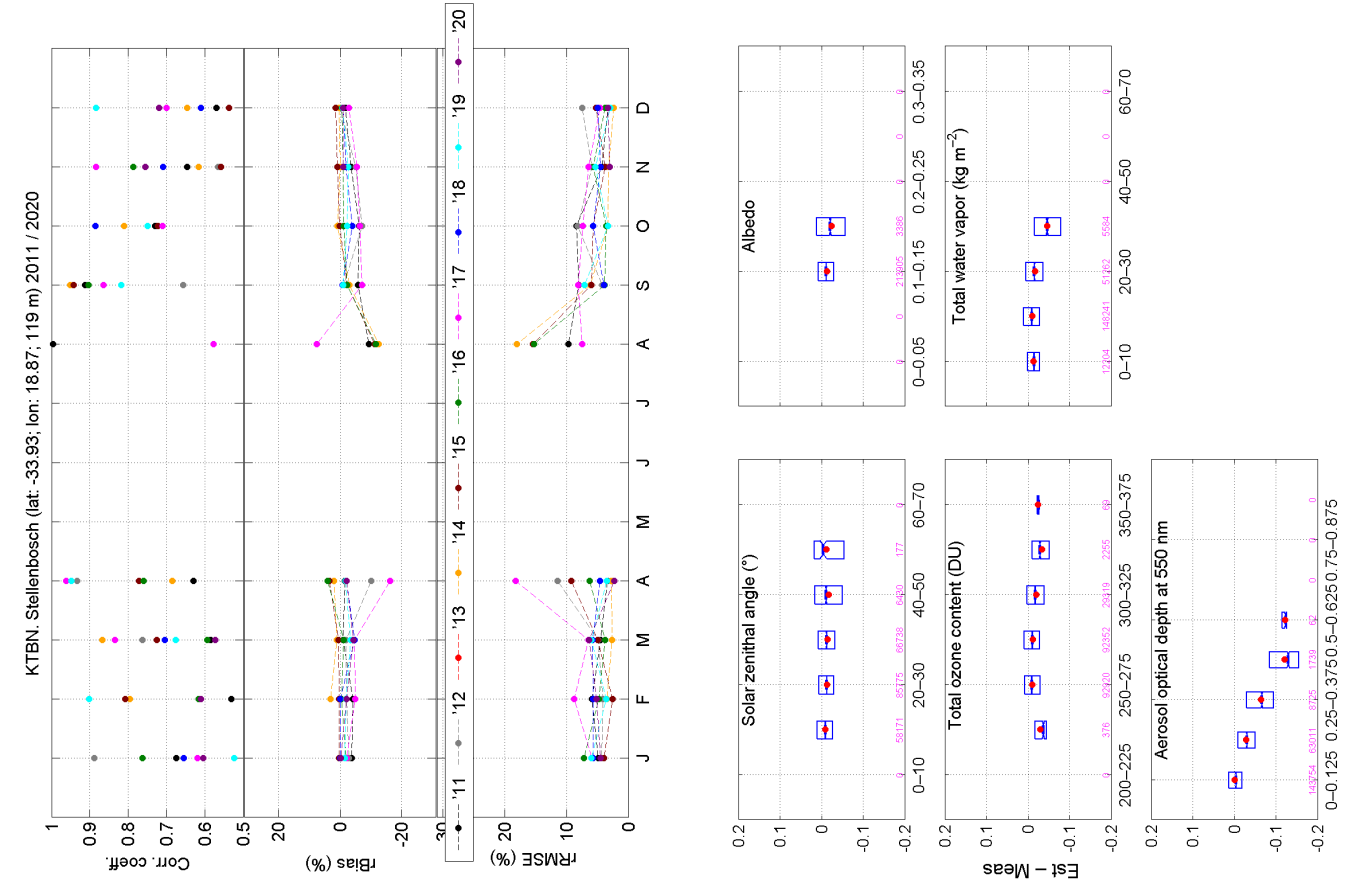

Figure S172: Comparison on direct clearness index at Stellenbosch

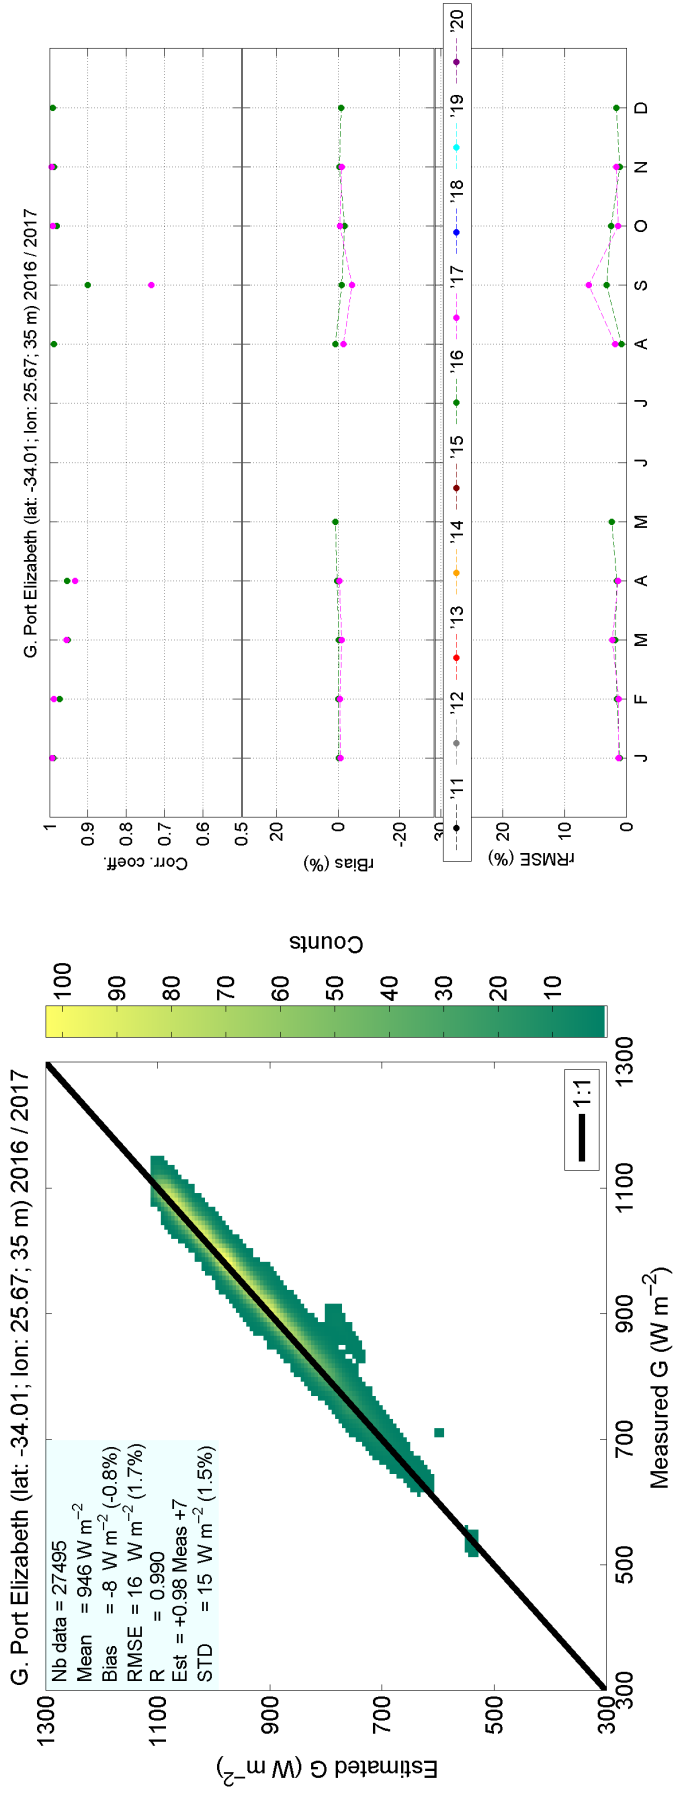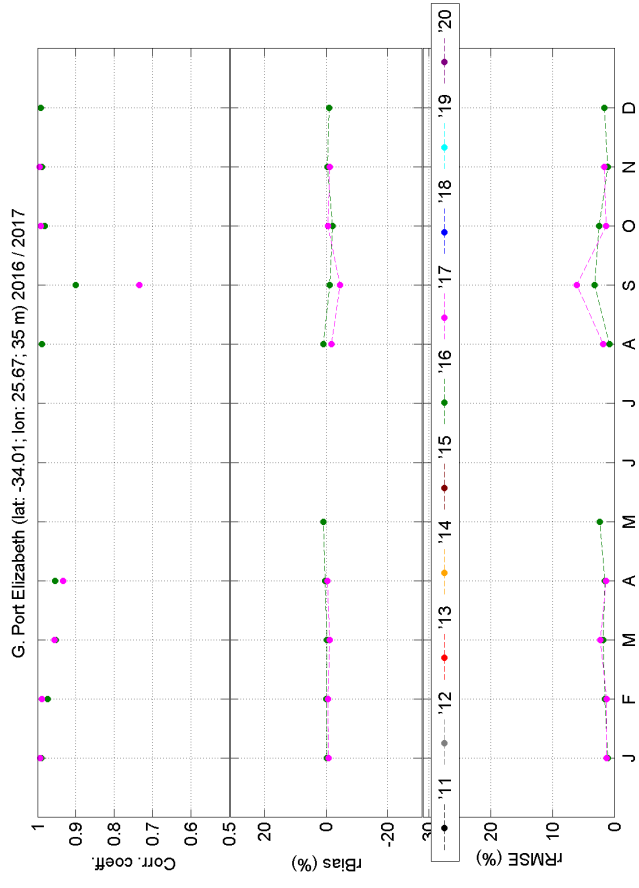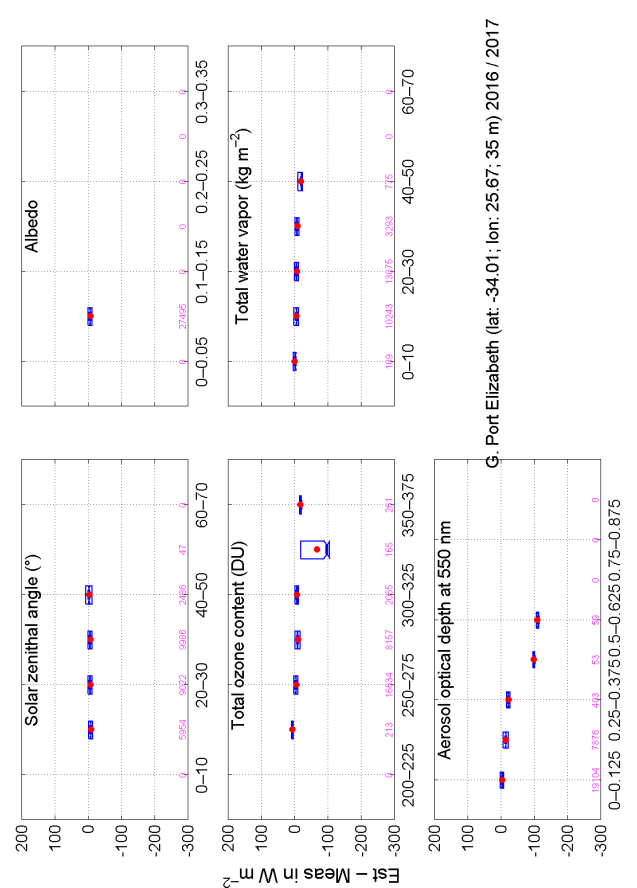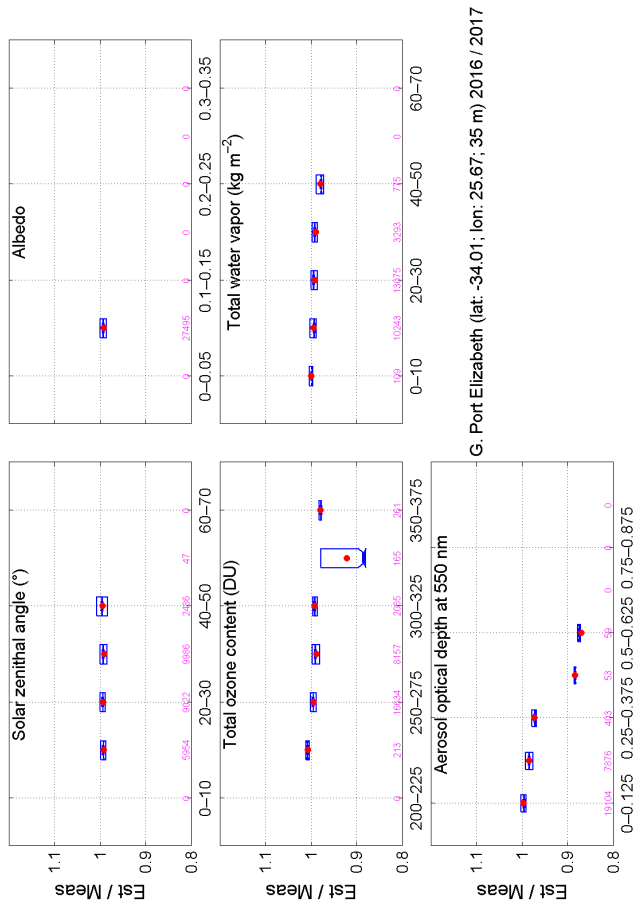

Figure S173: Comparison on global irradiance at Port Elizabeth

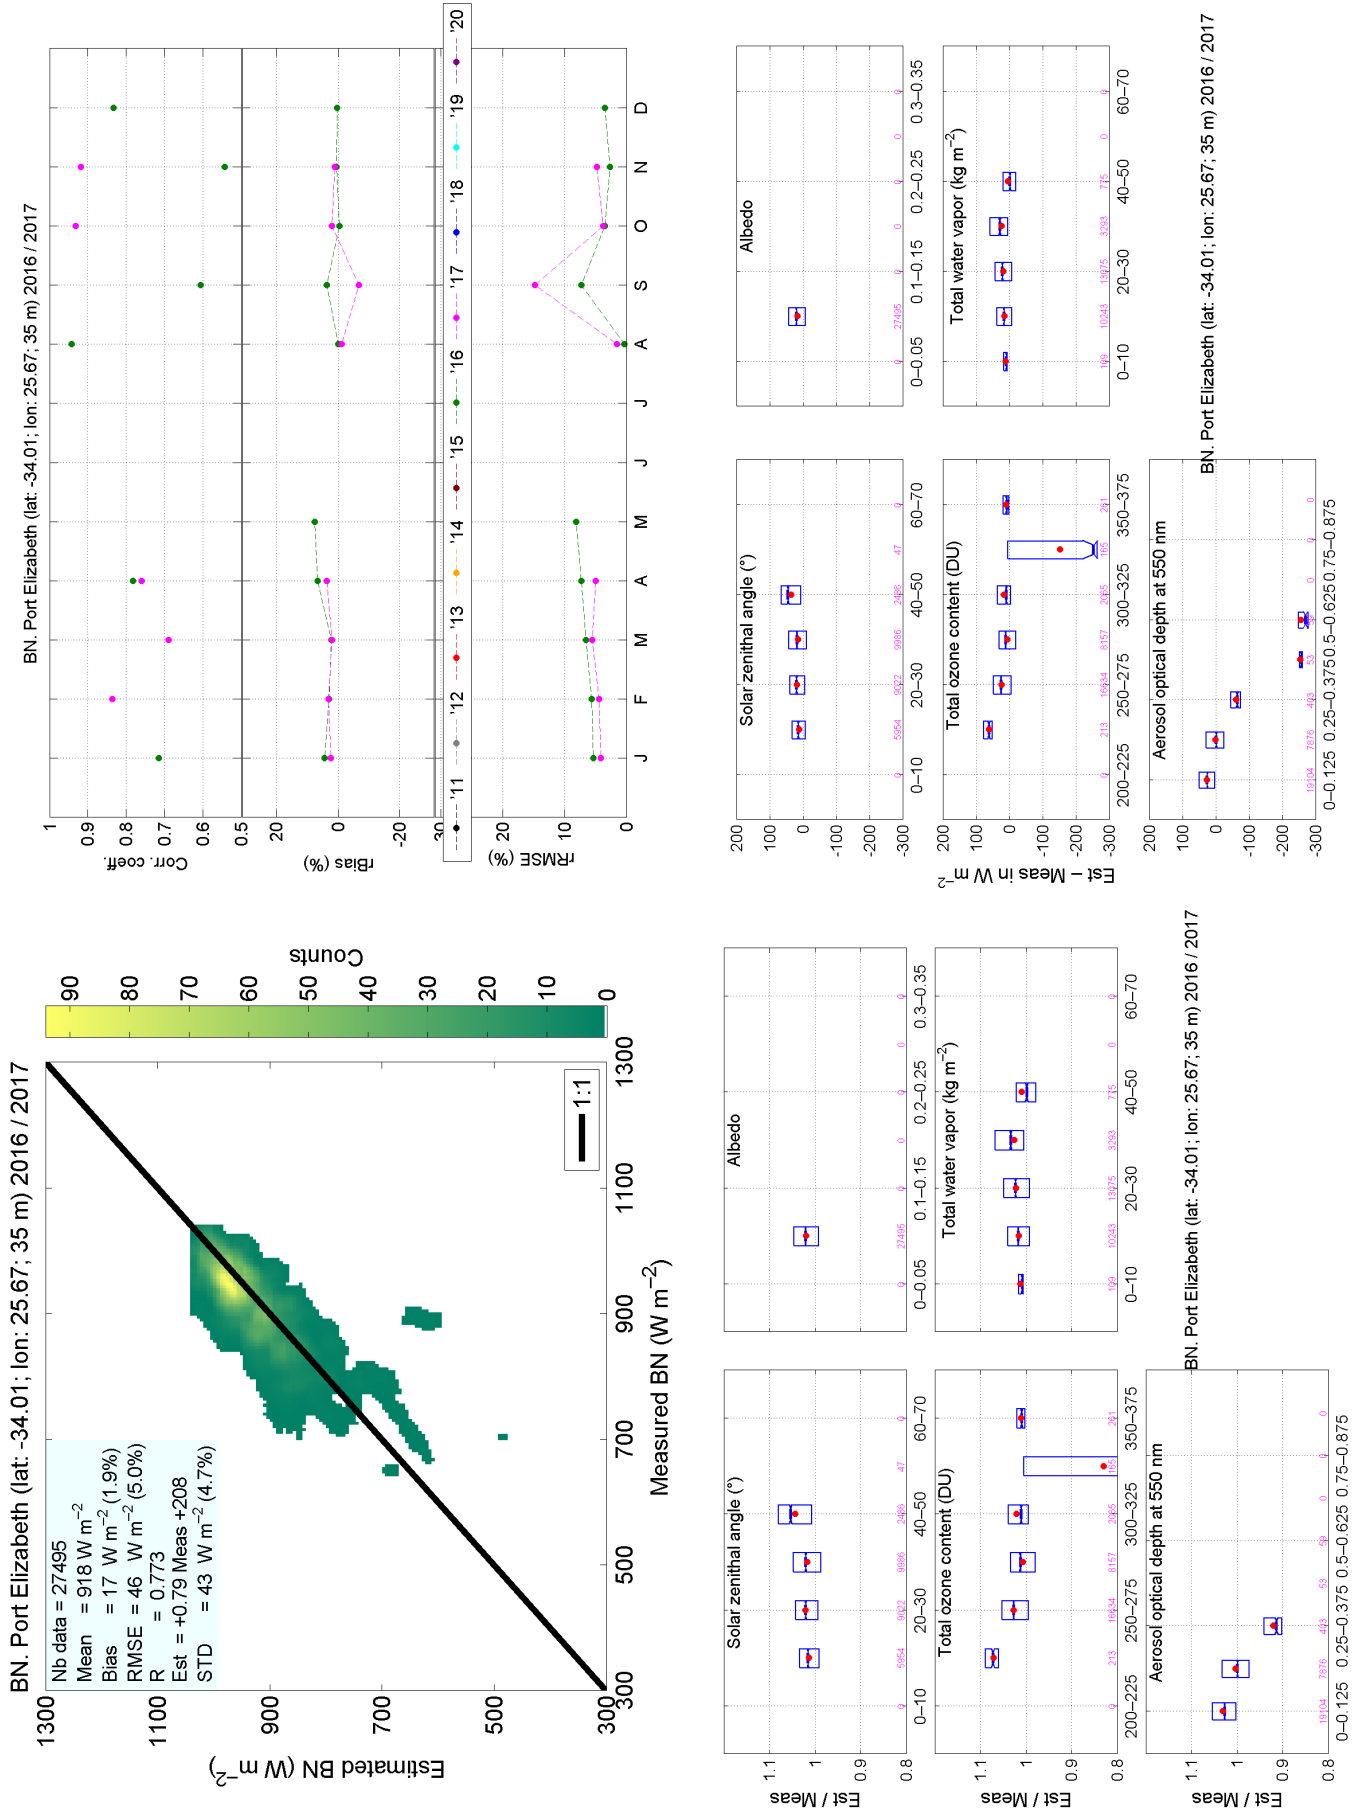

Figure S174: Comparison on direct component at normal irradiance at Port Elizabeth



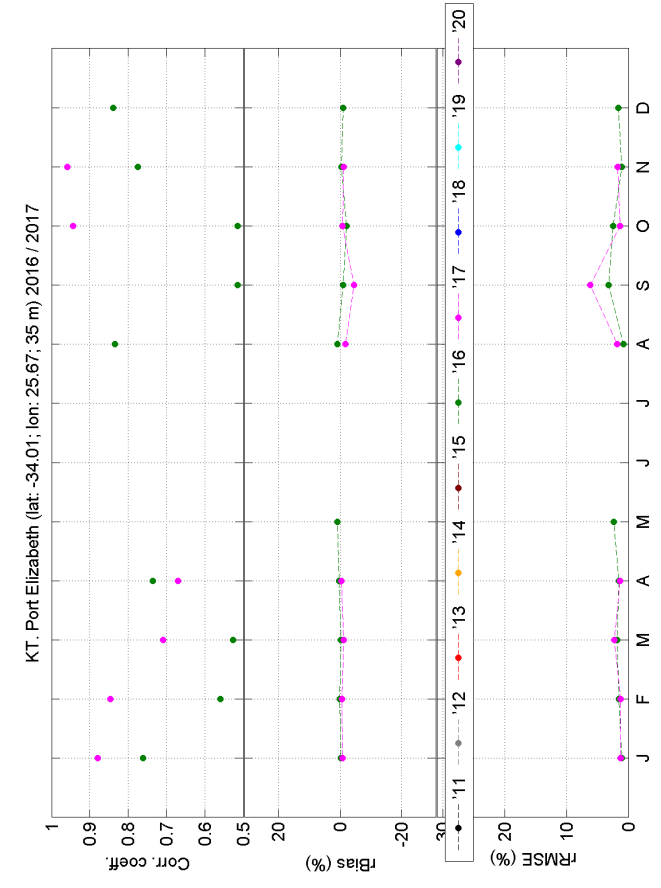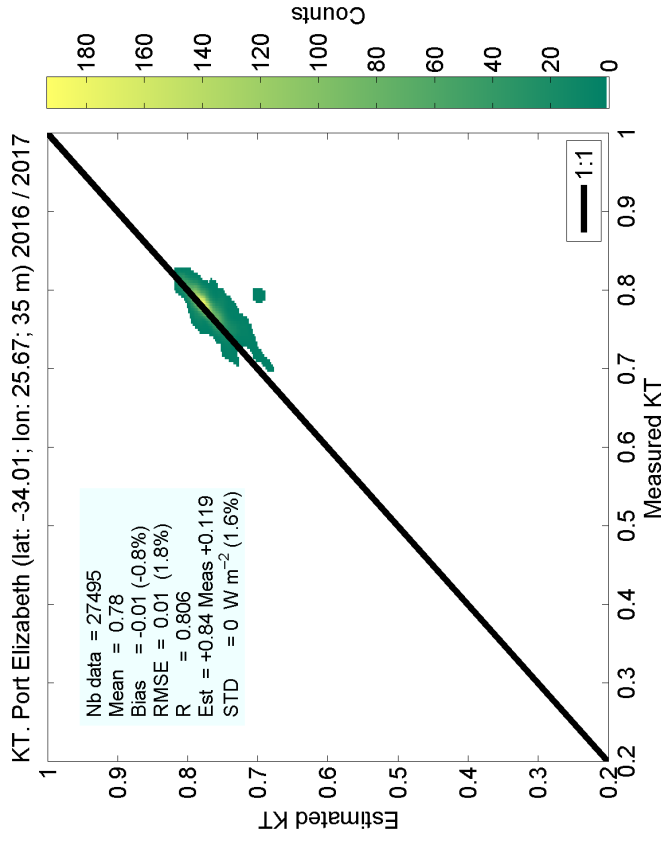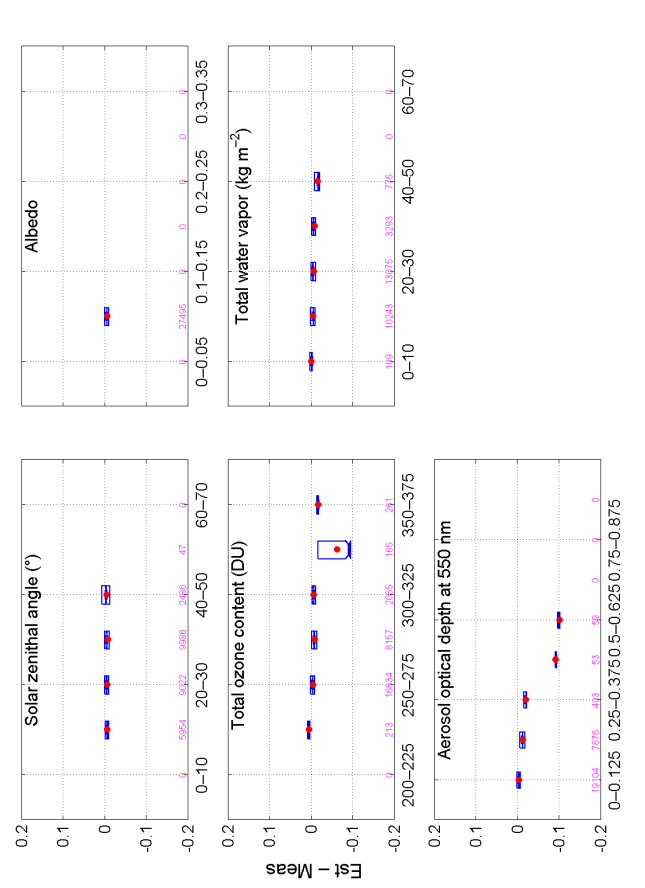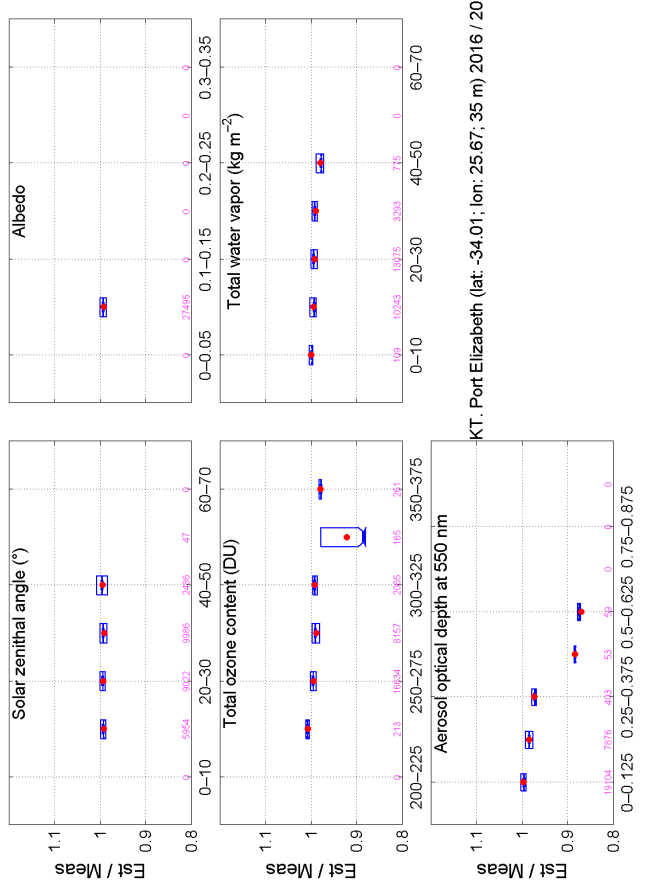

Figure S175: Comparison on clearness index at Port Elizabeth

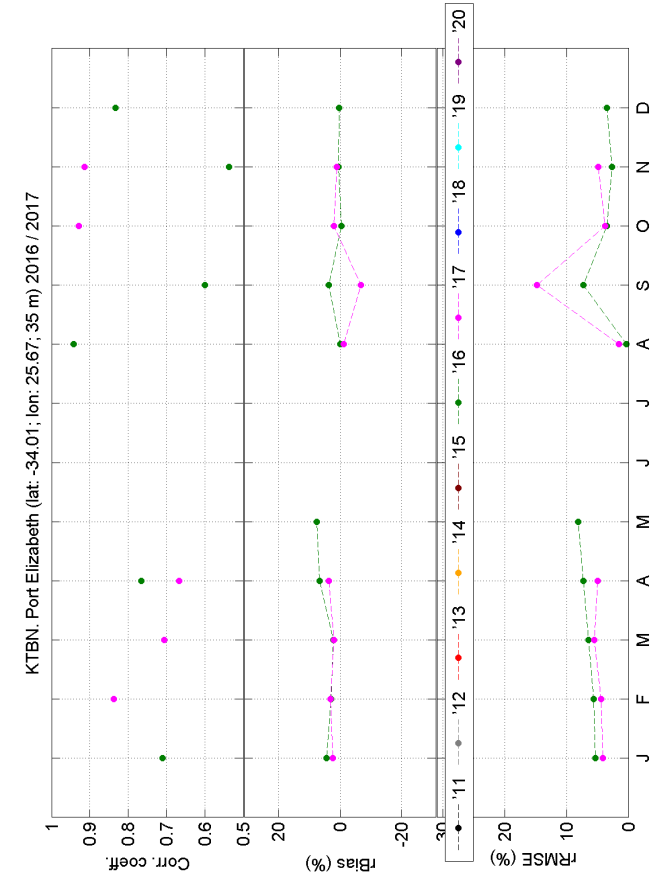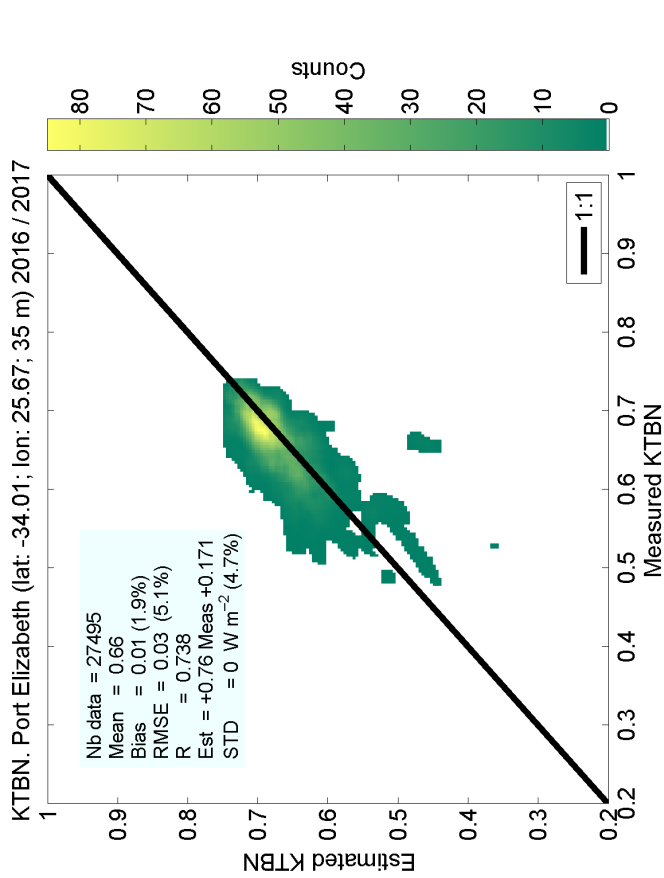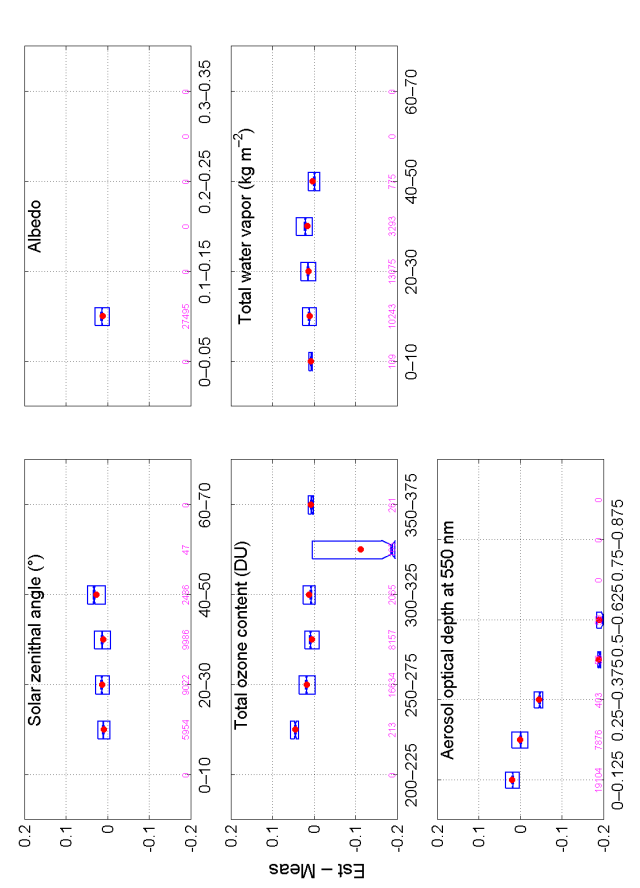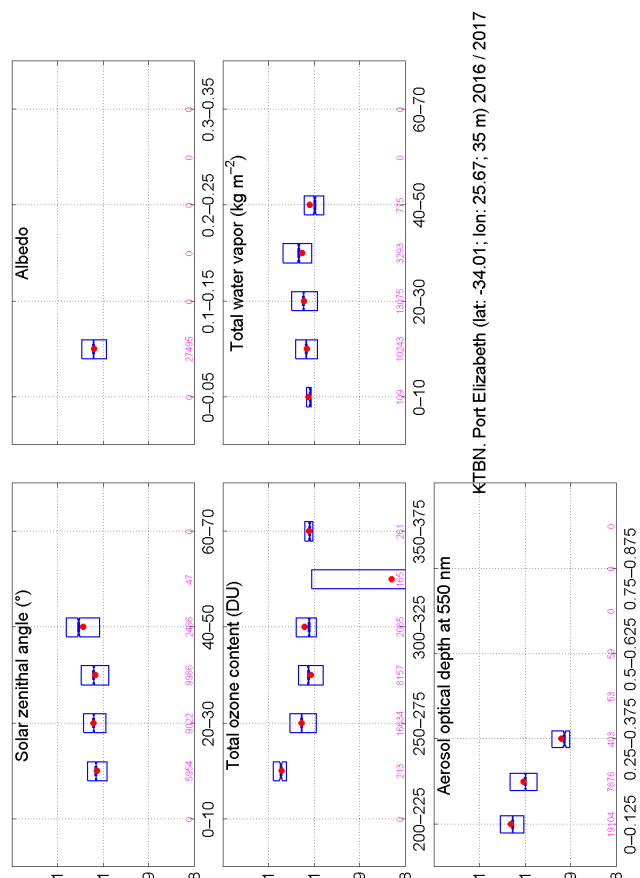

Figure S176: Comparison on direct clearness index at Port Elizabeth
